# Supplementary material for: Electronic Structure, Spectroscopic (IR, Raman, UV-Vis, NMR), Optoelectronic, and NLO Properties Investigations of Rubescin E (C31H36O7) Molecule in Gas Phase and Chloroform Solution Using Ab Initio and DFT Methods
Source: Hindawi journal article supplement (doi:10.1155/2019/4246810), 2019-01-02
Supplement: f1 [file 4246810.f1.zip]

## SUPPLEMENTARY MATERIAL S1

### RUBESCIN E GEOMETRIC PARAMETER

#### Optimized parameters

#### 1. opt=tight hf/6-311++g(d,p) nosymm

|                             |            |        |                  |   |
|-----------------------------|------------|--------|------------------|---|
| -----                       |            |        |                  |   |
| ! Optimized Parameters !    |            |        |                  |   |
| ! (Angstroms and Degrees) ! |            |        |                  |   |
| -----                       |            |        |                  |   |
| ! Name                      | Definition | Value  | Derivative Info. | ! |
| -----                       |            |        |                  |   |
| ! R1                        | R(1,2)     | 1.5503 | -DE/DX = 0.0     | ! |
| ! R2                        | R(1,3)     | 1.5698 | -DE/DX = 0.0     | ! |
| ! R3                        | R(1,20)    | 1.5167 | -DE/DX = 0.0     | ! |
| ! R4                        | R(1,22)    | 1.5474 | -DE/DX = 0.0     | ! |
| ! R5                        | R(2,7)     | 1.19   | -DE/DX = 0.0     | ! |
| ! R6                        | R(2,34)    | 1.5041 | -DE/DX = 0.0     | ! |
| ! R7                        | R(3,4)     | 1.5898 | -DE/DX = 0.0     | ! |
| ! R8                        | R(3,40)    | 1.4814 | -DE/DX = 0.0     | ! |
| ! R9                        | R(3,59)    | 1.3994 | -DE/DX = 0.0     | ! |
| ! R10                       | R(4,5)     | 1.5515 | -DE/DX = 0.0     | ! |
| ! R11                       | R(4,12)    | 1.5707 | -DE/DX = 0.0     | ! |
| ! R12                       | R(4,36)    | 1.5501 | -DE/DX = 0.0     | ! |
| ! R13                       | R(5,6)     | 1.5428 | -DE/DX = 0.0     | ! |
| ! R14                       | R(5,46)    | 1.4556 | -DE/DX = 0.0     | ! |
| ! R15                       | R(5,61)    | 1.4206 | -DE/DX = 0.0     | ! |
| ! R16                       | R(6,26)    | 1.5259 | -DE/DX = 0.0     | ! |
| ! R17                       | R(6,42)    | 1.5352 | -DE/DX = 0.0     | ! |
| ! R18                       | R(6,51)    | 1.5703 | -DE/DX = 0.0     | ! |
| ! R19                       | R(8,16)    | 1.5423 | -DE/DX = 0.0     | ! |
| ! R20                       | R(8,20)    | 1.5256 | -DE/DX = 0.0     | ! |
| ! R21                       | R(8,29)    | 1.5405 | -DE/DX = 0.0     | ! |
| ! R22                       | R(8,32)    | 1.5036 | -DE/DX = 0.0     | ! |
| ! R23                       | R(9,10)    | 1.0829 | -DE/DX = 0.0     | ! |
| ! R24                       | R(9,11)    | 1.412  | -DE/DX = 0.0     | ! |
| ! R25                       | R(9,12)    | 1.5288 | -DE/DX = 0.0     | ! |
| ! R26                       | R(9,20)    | 1.4997 | -DE/DX = 0.0     | ! |
| ! R27                       | R(11,29)   | 1.4261 | -DE/DX = 0.0     | ! |
| ! R28                       | R(12,13)   | 1.0811 | -DE/DX = 0.0     | ! |
| ! R29                       | R(12,60)   | 1.4104 | -DE/DX = 0.0     | ! |
| ! R30                       | R(14,51)   | 1.5035 | -DE/DX = 0.0     | ! |
| ! R31                       | R(14,53)   | 1.4493 | -DE/DX = 0.0     | ! |
| ! R32                       | R(14,57)   | 1.3411 | -DE/DX = 0.0     | ! |
| ! R33                       | R(15,55)   | 1.3382 | -DE/DX = 0.0     | ! |
| ! R34                       | R(15,57)   | 1.3467 | -DE/DX = 0.0     | ! |
| ! R35                       | R(16,17)   | 1.0867 | -DE/DX = 0.0     | ! |
| ! R36                       | R(16,18)   | 1.0847 | -DE/DX = 0.0     | ! |
| ! R37                       | R(16,19)   | 1.0801 | -DE/DX = 0.0     | ! |
| ! R38                       | R(20,21)   | 1.0877 | -DE/DX = 0.0     | ! |

|       |            |          |              |   |
|-------|------------|----------|--------------|---|
| ! R39 | R(22,23)   | 1.0823   | -DE/DX = 0.0 | ! |
| ! R40 | R(22,24)   | 1.0817   | -DE/DX = 0.0 | ! |
| ! R41 | R(22,25)   | 1.0804   | -DE/DX = 0.0 | ! |
| ! R42 | R(26,27)   | 1.0852   | -DE/DX = 0.0 | ! |
| ! R43 | R(26,28)   | 1.0849   | -DE/DX = 0.0 | ! |
| ! R44 | R(26,40)   | 1.5162   | -DE/DX = 0.0 | ! |
| ! R45 | R(29,30)   | 1.0847   | -DE/DX = 0.0 | ! |
| ! R46 | R(29,31)   | 1.0824   | -DE/DX = 0.0 | ! |
| ! R47 | R(32,33)   | 1.079    | -DE/DX = 0.0 | ! |
| ! R48 | R(32,34)   | 1.327    | -DE/DX = 0.0 | ! |
| ! R49 | R(34,35)   | 1.0757   | -DE/DX = 0.0 | ! |
| ! R50 | R(36,37)   | 1.0831   | -DE/DX = 0.0 | ! |
| ! R51 | R(36,38)   | 1.0769   | -DE/DX = 0.0 | ! |
| ! R52 | R(36,39)   | 1.0814   | -DE/DX = 0.0 | ! |
| ! R53 | R(40,41)   | 1.0705   | -DE/DX = 0.0 | ! |
| ! R54 | R(40,59)   | 1.401    | -DE/DX = 0.0 | ! |
| ! R55 | R(42,43)   | 1.0839   | -DE/DX = 0.0 | ! |
| ! R56 | R(42,44)   | 1.0814   | -DE/DX = 0.0 | ! |
| ! R57 | R(42,45)   | 1.0801   | -DE/DX = 0.0 | ! |
| ! R58 | R(46,47)   | 1.0753   | -DE/DX = 0.0 | ! |
| ! R59 | R(46,48)   | 1.5086   | -DE/DX = 0.0 | ! |
| ! R60 | R(46,61)   | 1.4005   | -DE/DX = 0.0 | ! |
| ! R61 | R(48,49)   | 1.0854   | -DE/DX = 0.0 | ! |
| ! R62 | R(48,50)   | 1.0863   | -DE/DX = 0.0 | ! |
| ! R63 | R(48,51)   | 1.5407   | -DE/DX = 0.0 | ! |
| ! R64 | R(51,52)   | 1.0819   | -DE/DX = 0.0 | ! |
| ! R65 | R(53,54)   | 1.0706   | -DE/DX = 0.0 | ! |
| ! R66 | R(53,55)   | 1.3381   | -DE/DX = 0.0 | ! |
| ! R67 | R(55,56)   | 1.0688   | -DE/DX = 0.0 | ! |
| ! R68 | R(57,58)   | 1.0679   | -DE/DX = 0.0 | ! |
| ! R69 | R(60,62)   | 1.3485   | -DE/DX = 0.0 | ! |
| ! R70 | R(62,63)   | 1.5033   | -DE/DX = 0.0 | ! |
| ! R71 | R(62,65)   | 1.181    | -DE/DX = 0.0 | ! |
| ! R72 | R(63,64)   | 1.3222   | -DE/DX = 0.0 | ! |
| ! R73 | R(63,71)   | 1.5153   | -DE/DX = 0.0 | ! |
| ! R74 | R(64,66)   | 1.0764   | -DE/DX = 0.0 | ! |
| ! R75 | R(64,67)   | 1.5001   | -DE/DX = 0.0 | ! |
| ! R76 | R(67,68)   | 1.0821   | -DE/DX = 0.0 | ! |
| ! R77 | R(67,69)   | 1.087    | -DE/DX = 0.0 | ! |
| ! R78 | R(67,70)   | 1.0873   | -DE/DX = 0.0 | ! |
| ! R79 | R(71,72)   | 1.0826   | -DE/DX = 0.0 | ! |
| ! R80 | R(71,73)   | 1.0865   | -DE/DX = 0.0 | ! |
| ! R81 | R(71,74)   | 1.0827   | -DE/DX = 0.0 | ! |
| ! A1  | A(2,1,3)   | 115.3869 | -DE/DX = 0.0 | ! |
| ! A2  | A(2,1,20)  | 104.9116 | -DE/DX = 0.0 | ! |
| ! A3  | A(2,1,22)  | 104.6632 | -DE/DX = 0.0 | ! |
| ! A4  | A(3,1,20)  | 105.4487 | -DE/DX = 0.0 | ! |
| ! A5  | A(3,1,22)  | 110.0598 | -DE/DX = 0.0 | ! |
| ! A6  | A(20,1,22) | 116.6507 | -DE/DX = 0.0 | ! |
| ! A7  | A(1,2,7)   | 122.6712 | -DE/DX = 0.0 | ! |
| ! A8  | A(1,2,34)  | 118.8294 | -DE/DX = 0.0 | ! |
| ! A9  | A(7,2,34)  | 118.3115 | -DE/DX = 0.0 | ! |

|       |             |          |              |   |
|-------|-------------|----------|--------------|---|
| ! A10 | A(1,3,4)    | 117.4677 | -DE/DX = 0.0 | ! |
| ! A11 | A(1,3,40)   | 120.4116 | -DE/DX = 0.0 | ! |
| ! A12 | A(1,3,59)   | 113.5239 | -DE/DX = 0.0 | ! |
| ! A13 | A(4,3,40)   | 119.7989 | -DE/DX = 0.0 | ! |
| ! A14 | A(4,3,59)   | 110.9192 | -DE/DX = 0.0 | ! |
| ! A15 | A(3,4,5)    | 108.2815 | -DE/DX = 0.0 | ! |
| ! A16 | A(3,4,12)   | 116.9097 | -DE/DX = 0.0 | ! |
| ! A17 | A(3,4,36)   | 107.3533 | -DE/DX = 0.0 | ! |
| ! A18 | A(5,4,12)   | 110.9502 | -DE/DX = 0.0 | ! |
| ! A19 | A(5,4,36)   | 108.2096 | -DE/DX = 0.0 | ! |
| ! A20 | A(12,4,36)  | 104.7402 | -DE/DX = 0.0 | ! |
| ! A21 | A(4,5,6)    | 122.3963 | -DE/DX = 0.0 | ! |
| ! A22 | A(4,5,46)   | 126.1434 | -DE/DX = 0.0 | ! |
| ! A23 | A(4,5,61)   | 113.7557 | -DE/DX = 0.0 | ! |
| ! A24 | A(6,5,46)   | 108.4092 | -DE/DX = 0.0 | ! |
| ! A25 | A(6,5,61)   | 109.3436 | -DE/DX = 0.0 | ! |
| ! A26 | A(5,6,26)   | 106.9225 | -DE/DX = 0.0 | ! |
| ! A27 | A(5,6,42)   | 114.7934 | -DE/DX = 0.0 | ! |
| ! A28 | A(5,6,51)   | 101.8612 | -DE/DX = 0.0 | ! |
| ! A29 | A(26,6,42)  | 108.8679 | -DE/DX = 0.0 | ! |
| ! A30 | A(26,6,51)  | 113.8205 | -DE/DX = 0.0 | ! |
| ! A31 | A(42,6,51)  | 110.5307 | -DE/DX = 0.0 | ! |
| ! A32 | A(16,8,20)  | 117.8467 | -DE/DX = 0.0 | ! |
| ! A33 | A(16,8,29)  | 108.395  | -DE/DX = 0.0 | ! |
| ! A34 | A(16,8,32)  | 109.5455 | -DE/DX = 0.0 | ! |
| ! A35 | A(20,8,29)  | 96.3773  | -DE/DX = 0.0 | ! |
| ! A36 | A(20,8,32)  | 106.3315 | -DE/DX = 0.0 | ! |
| ! A37 | A(29,8,32)  | 118.2843 | -DE/DX = 0.0 | ! |
| ! A38 | A(10,9,11)  | 108.4342 | -DE/DX = 0.0 | ! |
| ! A39 | A(10,9,12)  | 109.1563 | -DE/DX = 0.0 | ! |
| ! A40 | A(10,9,20)  | 113.4351 | -DE/DX = 0.0 | ! |
| ! A41 | A(11,9,12)  | 113.2108 | -DE/DX = 0.0 | ! |
| ! A42 | A(11,9,20)  | 103.336  | -DE/DX = 0.0 | ! |
| ! A43 | A(12,9,20)  | 109.2549 | -DE/DX = 0.0 | ! |
| ! A44 | A(9,11,29)  | 111.1841 | -DE/DX = 0.0 | ! |
| ! A45 | A(4,12,9)   | 110.4259 | -DE/DX = 0.0 | ! |
| ! A46 | A(4,12,13)  | 107.0388 | -DE/DX = 0.0 | ! |
| ! A47 | A(4,12,60)  | 111.1499 | -DE/DX = 0.0 | ! |
| ! A48 | A(9,12,13)  | 110.1207 | -DE/DX = 0.0 | ! |
| ! A49 | A(9,12,60)  | 109.0864 | -DE/DX = 0.0 | ! |
| ! A50 | A(13,12,60) | 108.9921 | -DE/DX = 0.0 | ! |
| ! A51 | A(51,14,53) | 126.042  | -DE/DX = 0.0 | ! |
| ! A52 | A(51,14,57) | 129.3418 | -DE/DX = 0.0 | ! |
| ! A53 | A(53,14,57) | 104.5893 | -DE/DX = 0.0 | ! |
| ! A54 | A(55,15,57) | 107.1084 | -DE/DX = 0.0 | ! |
| ! A55 | A(8,16,17)  | 108.9763 | -DE/DX = 0.0 | ! |
| ! A56 | A(8,16,18)  | 111.4211 | -DE/DX = 0.0 | ! |
| ! A57 | A(8,16,19)  | 112.6942 | -DE/DX = 0.0 | ! |
| ! A58 | A(17,16,18) | 107.3927 | -DE/DX = 0.0 | ! |
| ! A59 | A(17,16,19) | 107.4116 | -DE/DX = 0.0 | ! |
| ! A60 | A(18,16,19) | 108.7317 | -DE/DX = 0.0 | ! |
| ! A61 | A(1,20,8)   | 121.1479 | -DE/DX = 0.0 | ! |

|        |             |          |              |   |
|--------|-------------|----------|--------------|---|
| ! A62  | A(1,20,9)   | 118.7226 | -DE/DX = 0.0 | ! |
| ! A63  | A(1,20,21)  | 103.9684 | -DE/DX = 0.0 | ! |
| ! A64  | A(8,20,9)   | 103.812  | -DE/DX = 0.0 | ! |
| ! A65  | A(8,20,21)  | 102.8648 | -DE/DX = 0.0 | ! |
| ! A66  | A(9,20,21)  | 103.9251 | -DE/DX = 0.0 | ! |
| ! A67  | A(1,22,23)  | 111.2273 | -DE/DX = 0.0 | ! |
| ! A68  | A(1,22,24)  | 112.4028 | -DE/DX = 0.0 | ! |
| ! A69  | A(1,22,25)  | 108.9904 | -DE/DX = 0.0 | ! |
| ! A70  | A(23,22,24) | 107.6973 | -DE/DX = 0.0 | ! |
| ! A71  | A(23,22,25) | 107.5798 | -DE/DX = 0.0 | ! |
| ! A72  | A(24,22,25) | 108.8015 | -DE/DX = 0.0 | ! |
| ! A73  | A(6,26,27)  | 110.4567 | -DE/DX = 0.0 | ! |
| ! A74  | A(6,26,28)  | 110.7901 | -DE/DX = 0.0 | ! |
| ! A75  | A(6,26,40)  | 111.4945 | -DE/DX = 0.0 | ! |
| ! A76  | A(27,26,28) | 107.7426 | -DE/DX = 0.0 | ! |
| ! A77  | A(27,26,40) | 108.8133 | -DE/DX = 0.0 | ! |
| ! A78  | A(28,26,40) | 107.4113 | -DE/DX = 0.0 | ! |
| ! A79  | A(8,29,11)  | 104.4386 | -DE/DX = 0.0 | ! |
| ! A80  | A(8,29,30)  | 112.144  | -DE/DX = 0.0 | ! |
| ! A81  | A(8,29,31)  | 113.6297 | -DE/DX = 0.0 | ! |
| ! A82  | A(11,29,30) | 109.4369 | -DE/DX = 0.0 | ! |
| ! A83  | A(11,29,31) | 107.748  | -DE/DX = 0.0 | ! |
| ! A84  | A(30,29,31) | 109.2024 | -DE/DX = 0.0 | ! |
| ! A85  | A(8,32,33)  | 119.7184 | -DE/DX = 0.0 | ! |
| ! A86  | A(8,32,34)  | 120.4664 | -DE/DX = 0.0 | ! |
| ! A87  | A(33,32,34) | 119.714  | -DE/DX = 0.0 | ! |
| ! A88  | A(2,34,32)  | 125.2907 | -DE/DX = 0.0 | ! |
| ! A89  | A(2,34,35)  | 113.2592 | -DE/DX = 0.0 | ! |
| ! A90  | A(32,34,35) | 121.3309 | -DE/DX = 0.0 | ! |
| ! A91  | A(4,36,37)  | 110.5187 | -DE/DX = 0.0 | ! |
| ! A92  | A(4,36,38)  | 110.7606 | -DE/DX = 0.0 | ! |
| ! A93  | A(4,36,39)  | 111.3595 | -DE/DX = 0.0 | ! |
| ! A94  | A(37,36,38) | 107.9887 | -DE/DX = 0.0 | ! |
| ! A95  | A(37,36,39) | 107.4908 | -DE/DX = 0.0 | ! |
| ! A96  | A(38,36,39) | 108.5956 | -DE/DX = 0.0 | ! |
| ! A97  | A(3,40,26)  | 124.7594 | -DE/DX = 0.0 | ! |
| ! A98  | A(3,40,41)  | 116.9557 | -DE/DX = 0.0 | ! |
| ! A99  | A(26,40,41) | 114.7114 | -DE/DX = 0.0 | ! |
| ! A100 | A(26,40,59) | 116.1404 | -DE/DX = 0.0 | ! |
| ! A101 | A(41,40,59) | 112.6418 | -DE/DX = 0.0 | ! |
| ! A102 | A(6,42,43)  | 108.6831 | -DE/DX = 0.0 | ! |
| ! A103 | A(6,42,44)  | 112.6617 | -DE/DX = 0.0 | ! |
| ! A104 | A(6,42,45)  | 112.2871 | -DE/DX = 0.0 | ! |
| ! A105 | A(43,42,44) | 107.7832 | -DE/DX = 0.0 | ! |
| ! A106 | A(43,42,45) | 107.9888 | -DE/DX = 0.0 | ! |
| ! A107 | A(44,42,45) | 107.2453 | -DE/DX = 0.0 | ! |
| ! A108 | A(5,46,47)  | 123.8413 | -DE/DX = 0.0 | ! |
| ! A109 | A(5,46,48)  | 110.0006 | -DE/DX = 0.0 | ! |
| ! A110 | A(47,46,48) | 120.8648 | -DE/DX = 0.0 | ! |
| ! A111 | A(47,46,61) | 115.3262 | -DE/DX = 0.0 | ! |
| ! A112 | A(48,46,61) | 111.574  | -DE/DX = 0.0 | ! |
| ! A113 | A(46,48,49) | 112.4899 | -DE/DX = 0.0 | ! |

|                    |           |              |   |
|--------------------|-----------|--------------|---|
| ! A114 A(46,48,50) | 109.6211  | -DE/DX = 0.0 | ! |
| ! A115 A(46,48,51) | 102.6704  | -DE/DX = 0.0 | ! |
| ! A116 A(49,48,50) | 107.9435  | -DE/DX = 0.0 | ! |
| ! A117 A(49,48,51) | 111.84    | -DE/DX = 0.0 | ! |
| ! A118 A(50,48,51) | 112.2754  | -DE/DX = 0.0 | ! |
| ! A119 A(6,51,14)  | 116.8638  | -DE/DX = 0.0 | ! |
| ! A120 A(6,51,48)  | 104.4966  | -DE/DX = 0.0 | ! |
| ! A121 A(6,51,52)  | 106.7226  | -DE/DX = 0.0 | ! |
| ! A122 A(14,51,48) | 114.9685  | -DE/DX = 0.0 | ! |
| ! A123 A(14,51,52) | 106.5843  | -DE/DX = 0.0 | ! |
| ! A124 A(48,51,52) | 106.525   | -DE/DX = 0.0 | ! |
| ! A125 A(14,53,54) | 127.4874  | -DE/DX = 0.0 | ! |
| ! A126 A(14,53,55) | 106.1668  | -DE/DX = 0.0 | ! |
| ! A127 A(54,53,55) | 126.3432  | -DE/DX = 0.0 | ! |
| ! A128 A(15,55,53) | 110.7484  | -DE/DX = 0.0 | ! |
| ! A129 A(15,55,56) | 116.5608  | -DE/DX = 0.0 | ! |
| ! A130 A(53,55,56) | 132.6897  | -DE/DX = 0.0 | ! |
| ! A131 A(14,57,15) | 111.3857  | -DE/DX = 0.0 | ! |
| ! A132 A(14,57,58) | 132.9248  | -DE/DX = 0.0 | ! |
| ! A133 A(15,57,58) | 115.6894  | -DE/DX = 0.0 | ! |
| ! A134 A(12,60,62) | 123.1805  | -DE/DX = 0.0 | ! |
| ! A135 A(60,62,63) | 118.3342  | -DE/DX = 0.0 | ! |
| ! A136 A(60,62,65) | 118.3753  | -DE/DX = 0.0 | ! |
| ! A137 A(63,62,65) | 123.0766  | -DE/DX = 0.0 | ! |
| ! A138 A(62,63,64) | 116.9655  | -DE/DX = 0.0 | ! |
| ! A139 A(62,63,71) | 117.8479  | -DE/DX = 0.0 | ! |
| ! A140 A(64,63,71) | 125.0717  | -DE/DX = 0.0 | ! |
| ! A141 A(63,64,66) | 117.3417  | -DE/DX = 0.0 | ! |
| ! A142 A(63,64,67) | 127.2664  | -DE/DX = 0.0 | ! |
| ! A143 A(66,64,67) | 115.3855  | -DE/DX = 0.0 | ! |
| ! A144 A(64,67,68) | 113.2223  | -DE/DX = 0.0 | ! |
| ! A145 A(64,67,69) | 109.8634  | -DE/DX = 0.0 | ! |
| ! A146 A(64,67,70) | 109.9936  | -DE/DX = 0.0 | ! |
| ! A147 A(68,67,69) | 108.1249  | -DE/DX = 0.0 | ! |
| ! A148 A(68,67,70) | 108.4163  | -DE/DX = 0.0 | ! |
| ! A149 A(69,67,70) | 107.0102  | -DE/DX = 0.0 | ! |
| ! A150 A(63,71,72) | 110.8165  | -DE/DX = 0.0 | ! |
| ! A151 A(63,71,73) | 112.6001  | -DE/DX = 0.0 | ! |
| ! A152 A(63,71,74) | 110.4594  | -DE/DX = 0.0 | ! |
| ! A153 A(72,71,73) | 107.8589  | -DE/DX = 0.0 | ! |
| ! A154 A(72,71,74) | 107.2862  | -DE/DX = 0.0 | ! |
| ! A155 A(73,71,74) | 107.6085  | -DE/DX = 0.0 | ! |
| ! D1 D(3,1,2,7)    | -54.0251  | -DE/DX = 0.0 | ! |
| ! D2 D(3,1,2,34)   | 131.0437  | -DE/DX = 0.0 | ! |
| ! D3 D(20,1,2,7)   | -169.5876 | -DE/DX = 0.0 | ! |
| ! D4 D(20,1,2,34)  | 15.4811   | -DE/DX = 0.0 | ! |
| ! D5 D(22,1,2,7)   | 67.0805   | -DE/DX = 0.0 | ! |
| ! D6 D(22,1,2,34)  | -107.8507 | -DE/DX = 0.0 | ! |
| ! D7 D(2,1,3,4)    | -153.6797 | -DE/DX = 0.0 | ! |
| ! D8 D(2,1,3,40)   | 8.9874    | -DE/DX = 0.0 | ! |
| ! D9 D(2,1,3,59)   | 74.6238   | -DE/DX = 0.0 | ! |
| ! D10 D(20,1,3,4)  | -38.4239  | -DE/DX = 0.0 | ! |

|       |               |           |              |   |
|-------|---------------|-----------|--------------|---|
| ! D11 | D(20,1,3,40)  | 124.2431  | -DE/DX = 0.0 | ! |
| ! D12 | D(20,1,3,59)  | -170.1205 | -DE/DX = 0.0 | ! |
| ! D13 | D(22,1,3,4)   | 88.1837   | -DE/DX = 0.0 | ! |
| ! D14 | D(22,1,3,40)  | -109.1492 | -DE/DX = 0.0 | ! |
| ! D15 | D(22,1,3,59)  | -43.5128  | -DE/DX = 0.0 | ! |
| ! D16 | D(2,1,20,8)   | -50.1404  | -DE/DX = 0.0 | ! |
| ! D17 | D(2,1,20,9)   | 179.3716  | -DE/DX = 0.0 | ! |
| ! D18 | D(2,1,20,21)  | 64.5944   | -DE/DX = 0.0 | ! |
| ! D19 | D(3,1,20,8)   | -172.4093 | -DE/DX = 0.0 | ! |
| ! D20 | D(3,1,20,9)   | 57.1027   | -DE/DX = 0.0 | ! |
| ! D21 | D(3,1,20,21)  | -57.6746  | -DE/DX = 0.0 | ! |
| ! D22 | D(22,1,20,8)  | 65.1207   | -DE/DX = 0.0 | ! |
| ! D23 | D(22,1,20,9)  | -65.3673  | -DE/DX = 0.0 | ! |
| ! D24 | D(22,1,20,21) | 179.8555  | -DE/DX = 0.0 | ! |
| ! D25 | D(2,1,22,23)  | 39.5213   | -DE/DX = 0.0 | ! |
| ! D26 | D(2,1,22,24)  | 160.3755  | -DE/DX = 0.0 | ! |
| ! D27 | D(2,1,22,25)  | -78.9254  | -DE/DX = 0.0 | ! |
| ! D28 | D(3,1,22,23)  | 164.0854  | -DE/DX = 0.0 | ! |
| ! D29 | D(3,1,22,24)  | -75.0604  | -DE/DX = 0.0 | ! |
| ! D30 | D(3,1,22,25)  | 45.6387   | -DE/DX = 0.0 | ! |
| ! D31 | D(20,1,22,23) | -75.8783  | -DE/DX = 0.0 | ! |
| ! D32 | D(20,1,22,24) | 44.9759   | -DE/DX = 0.0 | ! |
| ! D33 | D(20,1,22,25) | 165.675   | -DE/DX = 0.0 | ! |
| ! D34 | D(1,2,34,32)  | 7.7985    | -DE/DX = 0.0 | ! |
| ! D35 | D(1,2,34,35)  | -176.1461 | -DE/DX = 0.0 | ! |
| ! D36 | D(7,2,34,32)  | -167.3555 | -DE/DX = 0.0 | ! |
| ! D37 | D(7,2,34,35)  | 8.6999    | -DE/DX = 0.0 | ! |
| ! D38 | D(1,3,4,5)    | 160.6895  | -DE/DX = 0.0 | ! |
| ! D39 | D(1,3,4,12)   | 34.5354   | -DE/DX = 0.0 | ! |
| ! D40 | D(1,3,4,36)   | -82.693   | -DE/DX = 0.0 | ! |
| ! D41 | D(40,3,4,5)   | -2.0881   | -DE/DX = 0.0 | ! |
| ! D42 | D(40,3,4,12)  | -128.2421 | -DE/DX = 0.0 | ! |
| ! D43 | D(40,3,4,36)  | 114.5295  | -DE/DX = 0.0 | ! |
| ! D44 | D(59,3,4,5)   | -66.4436  | -DE/DX = 0.0 | ! |
| ! D45 | D(59,3,4,12)  | 167.4023  | -DE/DX = 0.0 | ! |
| ! D46 | D(59,3,4,36)  | 50.1739   | -DE/DX = 0.0 | ! |
| ! D47 | D(1,3,40,26)  | -158.1678 | -DE/DX = 0.0 | ! |
| ! D48 | D(1,3,40,41)  | -0.6811   | -DE/DX = 0.0 | ! |
| ! D49 | D(4,3,40,26)  | 4.097     | -DE/DX = 0.0 | ! |
| ! D50 | D(4,3,40,41)  | 161.5838  | -DE/DX = 0.0 | ! |
| ! D51 | D(3,4,5,6)    | -31.1298  | -DE/DX = 0.0 | ! |
| ! D52 | D(3,4,5,46)   | 170.9607  | -DE/DX = 0.0 | ! |
| ! D53 | D(3,4,5,61)   | 103.9327  | -DE/DX = 0.0 | ! |
| ! D54 | D(12,4,5,6)   | 98.4288   | -DE/DX = 0.0 | ! |
| ! D55 | D(12,4,5,46)  | -59.4806  | -DE/DX = 0.0 | ! |
| ! D56 | D(12,4,5,61)  | -126.5087 | -DE/DX = 0.0 | ! |
| ! D57 | D(36,4,5,6)   | -147.1927 | -DE/DX = 0.0 | ! |
| ! D58 | D(36,4,5,46)  | 54.8979   | -DE/DX = 0.0 | ! |
| ! D59 | D(36,4,5,61)  | -12.1302  | -DE/DX = 0.0 | ! |
| ! D60 | D(3,4,12,9)   | -39.6689  | -DE/DX = 0.0 | ! |
| ! D61 | D(3,4,12,13)  | -159.5409 | -DE/DX = 0.0 | ! |
| ! D62 | D(3,4,12,60)  | 81.5432   | -DE/DX = 0.0 | ! |

|        |               |           |              |   |
|--------|---------------|-----------|--------------|---|
| ! D63  | D(5,4,12,9)   | -164.4888 | -DE/DX = 0.0 | ! |
| ! D64  | D(5,4,12,13)  | 75.6392   | -DE/DX = 0.0 | ! |
| ! D65  | D(5,4,12,60)  | -43.2767  | -DE/DX = 0.0 | ! |
| ! D66  | D(36,4,12,9)  | 78.9769   | -DE/DX = 0.0 | ! |
| ! D67  | D(36,4,12,13) | -40.895   | -DE/DX = 0.0 | ! |
| ! D68  | D(36,4,12,60) | -159.8109 | -DE/DX = 0.0 | ! |
| ! D69  | D(3,4,36,37)  | -170.9416 | -DE/DX = 0.0 | ! |
| ! D70  | D(3,4,36,38)  | -51.3036  | -DE/DX = 0.0 | ! |
| ! D71  | D(3,4,36,39)  | 69.6558   | -DE/DX = 0.0 | ! |
| ! D72  | D(5,4,36,37)  | -54.2768  | -DE/DX = 0.0 | ! |
| ! D73  | D(5,4,36,38)  | 65.3612   | -DE/DX = 0.0 | ! |
| ! D74  | D(5,4,36,39)  | -173.6794 | -DE/DX = 0.0 | ! |
| ! D75  | D(12,4,36,37) | 64.1325   | -DE/DX = 0.0 | ! |
| ! D76  | D(12,4,36,38) | -176.2295 | -DE/DX = 0.0 | ! |
| ! D77  | D(12,4,36,39) | -55.2702  | -DE/DX = 0.0 | ! |
| ! D78  | D(4,5,6,26)   | 59.7117   | -DE/DX = 0.0 | ! |
| ! D79  | D(4,5,6,42)   | -61.1446  | -DE/DX = 0.0 | ! |
| ! D80  | D(4,5,6,51)   | 179.3988  | -DE/DX = 0.0 | ! |
| ! D81  | D(46,5,6,26)  | -138.9557 | -DE/DX = 0.0 | ! |
| ! D82  | D(46,5,6,42)  | 100.188   | -DE/DX = 0.0 | ! |
| ! D83  | D(46,5,6,51)  | -19.2685  | -DE/DX = 0.0 | ! |
| ! D84  | D(61,5,6,26)  | -77.0396  | -DE/DX = 0.0 | ! |
| ! D85  | D(61,5,6,42)  | 162.1041  | -DE/DX = 0.0 | ! |
| ! D86  | D(61,5,6,51)  | 42.6476   | -DE/DX = 0.0 | ! |
| ! D87  | D(4,5,46,47)  | 4.0207    | -DE/DX = 0.0 | ! |
| ! D88  | D(4,5,46,48)  | 158.3559  | -DE/DX = 0.0 | ! |
| ! D89  | D(6,5,46,47)  | -156.427  | -DE/DX = 0.0 | ! |
| ! D90  | D(6,5,46,48)  | -2.0918   | -DE/DX = 0.0 | ! |
| ! D91  | D(5,6,26,27)  | -172.0749 | -DE/DX = 0.0 | ! |
| ! D92  | D(5,6,26,28)  | 68.6153   | -DE/DX = 0.0 | ! |
| ! D93  | D(5,6,26,40)  | -50.956   | -DE/DX = 0.0 | ! |
| ! D94  | D(42,6,26,27) | -47.52    | -DE/DX = 0.0 | ! |
| ! D95  | D(42,6,26,28) | -166.8298 | -DE/DX = 0.0 | ! |
| ! D96  | D(42,6,26,40) | 73.5989   | -DE/DX = 0.0 | ! |
| ! D97  | D(51,6,26,27) | 76.2605   | -DE/DX = 0.0 | ! |
| ! D98  | D(51,6,26,28) | -43.0493  | -DE/DX = 0.0 | ! |
| ! D99  | D(51,6,26,40) | -162.6206 | -DE/DX = 0.0 | ! |
| ! D100 | D(5,6,42,43)  | -179.4956 | -DE/DX = 0.0 | ! |
| ! D101 | D(5,6,42,44)  | -60.1178  | -DE/DX = 0.0 | ! |
| ! D102 | D(5,6,42,45)  | 61.1028   | -DE/DX = 0.0 | ! |
| ! D103 | D(26,6,42,43) | 60.7223   | -DE/DX = 0.0 | ! |
| ! D104 | D(26,6,42,44) | -179.8999 | -DE/DX = 0.0 | ! |
| ! D105 | D(26,6,42,45) | -58.6793  | -DE/DX = 0.0 | ! |
| ! D106 | D(51,6,42,43) | -64.9916  | -DE/DX = 0.0 | ! |
| ! D107 | D(51,6,42,44) | 54.3862   | -DE/DX = 0.0 | ! |
| ! D108 | D(51,6,42,45) | 175.6067  | -DE/DX = 0.0 | ! |
| ! D109 | D(5,6,51,14)  | 161.3596  | -DE/DX = 0.0 | ! |
| ! D110 | D(5,6,51,48)  | 33.0644   | -DE/DX = 0.0 | ! |
| ! D111 | D(5,6,51,52)  | -79.5447  | -DE/DX = 0.0 | ! |
| ! D112 | D(26,6,51,14) | -83.9417  | -DE/DX = 0.0 | ! |
| ! D113 | D(26,6,51,48) | 147.7632  | -DE/DX = 0.0 | ! |
| ! D114 | D(26,6,51,52) | 35.154    | -DE/DX = 0.0 | ! |

|        |               |           |              |   |
|--------|---------------|-----------|--------------|---|
| ! D115 | D(42,6,51,14) | 38.9334   | -DE/DX = 0.0 | ! |
| ! D116 | D(42,6,51,48) | -89.3618  | -DE/DX = 0.0 | ! |
| ! D117 | D(42,6,51,52) | 158.0291  | -DE/DX = 0.0 | ! |
| ! D118 | D(20,8,16,17) | -173.7757 | -DE/DX = 0.0 | ! |
| ! D119 | D(20,8,16,18) | -55.4515  | -DE/DX = 0.0 | ! |
| ! D120 | D(20,8,16,19) | 67.0947   | -DE/DX = 0.0 | ! |
| ! D121 | D(29,8,16,17) | -65.8327  | -DE/DX = 0.0 | ! |
| ! D122 | D(29,8,16,18) | 52.4915   | -DE/DX = 0.0 | ! |
| ! D123 | D(29,8,16,19) | 175.0377  | -DE/DX = 0.0 | ! |
| ! D124 | D(32,8,16,17) | 64.5551   | -DE/DX = 0.0 | ! |
| ! D125 | D(32,8,16,18) | -177.1207 | -DE/DX = 0.0 | ! |
| ! D126 | D(32,8,16,19) | -54.5745  | -DE/DX = 0.0 | ! |
| ! D127 | D(16,8,20,1)  | -65.974   | -DE/DX = 0.0 | ! |
| ! D128 | D(16,8,20,9)  | 70.6469   | -DE/DX = 0.0 | ! |
| ! D129 | D(16,8,20,21) | 178.7271  | -DE/DX = 0.0 | ! |
| ! D130 | D(29,8,20,1)  | 179.3076  | -DE/DX = 0.0 | ! |
| ! D131 | D(29,8,20,9)  | -44.0715  | -DE/DX = 0.0 | ! |
| ! D132 | D(29,8,20,21) | 64.0086   | -DE/DX = 0.0 | ! |
| ! D133 | D(32,8,20,1)  | 57.3296   | -DE/DX = 0.0 | ! |
| ! D134 | D(32,8,20,9)  | -166.0495 | -DE/DX = 0.0 | ! |
| ! D135 | D(32,8,20,21) | -57.9694  | -DE/DX = 0.0 | ! |
| ! D136 | D(16,8,29,11) | -83.1384  | -DE/DX = 0.0 | ! |
| ! D137 | D(16,8,29,30) | 158.4524  | -DE/DX = 0.0 | ! |
| ! D138 | D(16,8,29,31) | 34.0055   | -DE/DX = 0.0 | ! |
| ! D139 | D(20,8,29,11) | 39.0357   | -DE/DX = 0.0 | ! |
| ! D140 | D(20,8,29,30) | -79.3736  | -DE/DX = 0.0 | ! |
| ! D141 | D(20,8,29,31) | 156.1796  | -DE/DX = 0.0 | ! |
| ! D142 | D(32,8,29,11) | 151.4591  | -DE/DX = 0.0 | ! |
| ! D143 | D(32,8,29,30) | 33.0498   | -DE/DX = 0.0 | ! |
| ! D144 | D(32,8,29,31) | -91.397   | -DE/DX = 0.0 | ! |
| ! D145 | D(16,8,32,33) | -75.4656  | -DE/DX = 0.0 | ! |
| ! D146 | D(16,8,32,34) | 100.8667  | -DE/DX = 0.0 | ! |
| ! D147 | D(20,8,32,33) | 156.1792  | -DE/DX = 0.0 | ! |
| ! D148 | D(20,8,32,34) | -27.4885  | -DE/DX = 0.0 | ! |
| ! D149 | D(29,8,32,33) | 49.3746   | -DE/DX = 0.0 | ! |
| ! D150 | D(29,8,32,34) | -134.293  | -DE/DX = 0.0 | ! |
| ! D151 | D(10,9,11,29) | 112.6116  | -DE/DX = 0.0 | ! |
| ! D152 | D(12,9,11,29) | -126.1035 | -DE/DX = 0.0 | ! |
| ! D153 | D(20,9,11,29) | -8.0425   | -DE/DX = 0.0 | ! |
| ! D154 | D(10,9,12,4)  | -72.4472  | -DE/DX = 0.0 | ! |
| ! D155 | D(10,9,12,13) | 45.5506   | -DE/DX = 0.0 | ! |
| ! D156 | D(10,9,12,60) | 165.1225  | -DE/DX = 0.0 | ! |
| ! D157 | D(11,9,12,4)  | 166.6757  | -DE/DX = 0.0 | ! |
| ! D158 | D(11,9,12,13) | -75.3266  | -DE/DX = 0.0 | ! |
| ! D159 | D(11,9,12,60) | 44.2453   | -DE/DX = 0.0 | ! |
| ! D160 | D(20,9,12,4)  | 52.1161   | -DE/DX = 0.0 | ! |
| ! D161 | D(20,9,12,13) | 170.1138  | -DE/DX = 0.0 | ! |
| ! D162 | D(20,9,12,60) | -70.3142  | -DE/DX = 0.0 | ! |
| ! D163 | D(10,9,20,1)  | 54.739    | -DE/DX = 0.0 | ! |
| ! D164 | D(10,9,20,8)  | -83.1723  | -DE/DX = 0.0 | ! |
| ! D165 | D(10,9,20,21) | 169.5395  | -DE/DX = 0.0 | ! |
| ! D166 | D(11,9,20,1)  | 171.9296  | -DE/DX = 0.0 | ! |



|                       |           |              |   |
|-----------------------|-----------|--------------|---|
| ! D167 D(11,9,20,8)   | 34.0183   | -DE/DX = 0.0 | ! |
| ! D168 D(11,9,20,21)  | -73.2699  | -DE/DX = 0.0 | ! |
| ! D169 D(12,9,20,1)   | -67.2837  | -DE/DX = 0.0 | ! |
| ! D170 D(12,9,20,8)   | 154.805   | -DE/DX = 0.0 | ! |
| ! D171 D(12,9,20,21)  | 47.5168   | -DE/DX = 0.0 | ! |
| ! D172 D(9,11,29,8)   | -20.6978  | -DE/DX = 0.0 | ! |
| ! D173 D(9,11,29,30)  | 99.5413   | -DE/DX = 0.0 | ! |
| ! D174 D(9,11,29,31)  | -141.8283 | -DE/DX = 0.0 | ! |
| ! D175 D(4,12,60,62)  | 167.566   | -DE/DX = 0.0 | ! |
| ! D176 D(9,12,60,62)  | -70.4399  | -DE/DX = 0.0 | ! |
| ! D177 D(13,12,60,62) | 49.8287   | -DE/DX = 0.0 | ! |
| ! D178 D(53,14,51,6)  | 74.303    | -DE/DX = 0.0 | ! |
| ! D179 D(53,14,51,48) | -162.6452 | -DE/DX = 0.0 | ! |
| ! D180 D(53,14,51,52) | -44.867   | -DE/DX = 0.0 | ! |
| ! D181 D(57,14,51,6)  | -107.8839 | -DE/DX = 0.0 | ! |
| ! D182 D(57,14,51,48) | 15.1679   | -DE/DX = 0.0 | ! |
| ! D183 D(57,14,51,52) | 132.9462  | -DE/DX = 0.0 | ! |
| ! D184 D(51,14,53,54) | -0.8266   | -DE/DX = 0.0 | ! |
| ! D185 D(51,14,53,55) | 178.6105  | -DE/DX = 0.0 | ! |
| ! D186 D(57,14,53,54) | -179.0791 | -DE/DX = 0.0 | ! |
| ! D187 D(57,14,53,55) | 0.3579    | -DE/DX = 0.0 | ! |
| ! D188 D(51,14,57,15) | -178.5301 | -DE/DX = 0.0 | ! |
| ! D189 D(51,14,57,58) | 1.3371    | -DE/DX = 0.0 | ! |
| ! D190 D(53,14,57,15) | -0.3572   | -DE/DX = 0.0 | ! |
| ! D191 D(53,14,57,58) | 179.5101  | -DE/DX = 0.0 | ! |
| ! D192 D(57,15,55,53) | 0.0259    | -DE/DX = 0.0 | ! |
| ! D193 D(57,15,55,56) | 179.6887  | -DE/DX = 0.0 | ! |
| ! D194 D(55,15,57,14) | 0.2231    | -DE/DX = 0.0 | ! |
| ! D195 D(55,15,57,58) | -179.669  | -DE/DX = 0.0 | ! |
| ! D196 D(6,26,40,3)   | 24.7883   | -DE/DX = 0.0 | ! |
| ! D197 D(6,26,40,41)  | -133.1439 | -DE/DX = 0.0 | ! |
| ! D198 D(6,26,40,59)  | 92.5968   | -DE/DX = 0.0 | ! |
| ! D199 D(27,26,40,3)  | 146.8604  | -DE/DX = 0.0 | ! |
| ! D200 D(27,26,40,41) | -11.0718  | -DE/DX = 0.0 | ! |
| ! D201 D(27,26,40,59) | -145.3311 | -DE/DX = 0.0 | ! |
| ! D202 D(28,26,40,3)  | -96.7648  | -DE/DX = 0.0 | ! |
| ! D203 D(28,26,40,41) | 105.3029  | -DE/DX = 0.0 | ! |
| ! D204 D(28,26,40,59) | -28.9564  | -DE/DX = 0.0 | ! |
| ! D205 D(8,32,34,2)   | -0.863    | -DE/DX = 0.0 | ! |
| ! D206 D(8,32,34,35)  | -176.6198 | -DE/DX = 0.0 | ! |
| ! D207 D(33,32,34,2)  | 175.4695  | -DE/DX = 0.0 | ! |
| ! D208 D(33,32,34,35) | -0.2873   | -DE/DX = 0.0 | ! |
| ! D209 D(5,46,48,49)  | 143.4151  | -DE/DX = 0.0 | ! |
| ! D210 D(5,46,48,50)  | -96.4798  | -DE/DX = 0.0 | ! |
| ! D211 D(5,46,48,51)  | 23.033    | -DE/DX = 0.0 | ! |
| ! D212 D(47,46,48,49) | -61.3614  | -DE/DX = 0.0 | ! |
| ! D213 D(47,46,48,50) | 58.7437   | -DE/DX = 0.0 | ! |
| ! D214 D(47,46,48,51) | 178.2565  | -DE/DX = 0.0 | ! |
| ! D215 D(61,46,48,49) | 79.1907   | -DE/DX = 0.0 | ! |
| ! D216 D(61,46,48,50) | -160.7043 | -DE/DX = 0.0 | ! |
| ! D217 D(61,46,48,51) | -41.1914  | -DE/DX = 0.0 | ! |
| ! D218 D(46,48,51,6)  | -34.491   | -DE/DX = 0.0 | ! |

|        |                |           |              |   |
|--------|----------------|-----------|--------------|---|
| ! D219 | D(46,48,51,14) | -163.929  | -DE/DX = 0.0 | ! |
| ! D220 | D(46,48,51,52) | 78.2593   | -DE/DX = 0.0 | ! |
| ! D221 | D(49,48,51,6)  | -155.3207 | -DE/DX = 0.0 | ! |
| ! D222 | D(49,48,51,14) | 75.2413   | -DE/DX = 0.0 | ! |
| ! D223 | D(49,48,51,52) | -42.5704  | -DE/DX = 0.0 | ! |
| ! D224 | D(50,48,51,6)  | 83.1563   | -DE/DX = 0.0 | ! |
| ! D225 | D(50,48,51,14) | -46.2817  | -DE/DX = 0.0 | ! |
| ! D226 | D(50,48,51,52) | -164.0934 | -DE/DX = 0.0 | ! |
| ! D227 | D(14,53,55,15) | -0.2396   | -DE/DX = 0.0 | ! |
| ! D228 | D(14,53,55,56) | -179.8292 | -DE/DX = 0.0 | ! |
| ! D229 | D(54,53,55,15) | 179.2058  | -DE/DX = 0.0 | ! |
| ! D230 | D(54,53,55,56) | -0.3838   | -DE/DX = 0.0 | ! |
| ! D231 | D(12,60,62,63) | -45.3512  | -DE/DX = 0.0 | ! |
| ! D232 | D(12,60,62,65) | 139.7972  | -DE/DX = 0.0 | ! |
| ! D233 | D(60,62,63,64) | 134.4528  | -DE/DX = 0.0 | ! |
| ! D234 | D(60,62,63,71) | -49.2459  | -DE/DX = 0.0 | ! |
| ! D235 | D(65,62,63,64) | -50.9538  | -DE/DX = 0.0 | ! |
| ! D236 | D(65,62,63,71) | 125.3475  | -DE/DX = 0.0 | ! |
| ! D237 | D(62,63,64,66) | -2.151    | -DE/DX = 0.0 | ! |
| ! D238 | D(62,63,64,67) | 178.8186  | -DE/DX = 0.0 | ! |
| ! D239 | D(71,63,64,66) | -178.1547 | -DE/DX = 0.0 | ! |
| ! D240 | D(71,63,64,67) | 2.8149    | -DE/DX = 0.0 | ! |
| ! D241 | D(62,63,71,72) | -19.5718  | -DE/DX = 0.0 | ! |
| ! D242 | D(62,63,71,73) | 101.3349  | -DE/DX = 0.0 | ! |
| ! D243 | D(62,63,71,74) | -138.3317 | -DE/DX = 0.0 | ! |
| ! D244 | D(64,63,71,72) | 156.3998  | -DE/DX = 0.0 | ! |
| ! D245 | D(64,63,71,73) | -82.6935  | -DE/DX = 0.0 | ! |
| ! D246 | D(64,63,71,74) | 37.6399   | -DE/DX = 0.0 | ! |
| ! D247 | D(63,64,67,68) | 1.1408    | -DE/DX = 0.0 | ! |
| ! D248 | D(63,64,67,69) | 122.1342  | -DE/DX = 0.0 | ! |
| ! D249 | D(63,64,67,70) | -120.3209 | -DE/DX = 0.0 | ! |
| ! D250 | D(66,64,67,68) | -177.9059 | -DE/DX = 0.0 | ! |
| ! D251 | D(66,64,67,69) | -56.9125  | -DE/DX = 0.0 | ! |
| ! D252 | D(66,64,67,70) | 60.6324   | -DE/DX = 0.0 | ! |

## 2. opt=tight hf/6-311++g(d,p) scrf=(cpcm,solvent=chloroform,read) nosymm

```

-----
! Optimized Parameters !
! (Angstroms and Degrees) !
-----
! Name Definition      Value      Derivative Info.      !
-----
! R1  R(1,2)           1.549      -DE/DX = 0.0          !
! R2  R(1,3)           1.5672     -DE/DX = 0.0          !
! R3  R(1,20)          1.5157     -DE/DX = 0.0          !
! R4  R(1,22)          1.5481     -DE/DX = 0.0          !
! R5  R(2,7)           1.1948     -DE/DX = 0.0          !
! R6  R(2,34)          1.4992     -DE/DX = 0.0          !
! R7  R(3,4)           1.5887     -DE/DX = 0.0          !

```

|       |          |        |              |   |
|-------|----------|--------|--------------|---|
| ! R8  | R(3,40)  | 1.48   | -DE/DX = 0.0 | ! |
| ! R9  | R(3,59)  | 1.4024 | -DE/DX = 0.0 | ! |
| ! R10 | R(4,5)   | 1.5518 | -DE/DX = 0.0 | ! |
| ! R11 | R(4,12)  | 1.5733 | -DE/DX = 0.0 | ! |
| ! R12 | R(4,36)  | 1.5503 | -DE/DX = 0.0 | ! |
| ! R13 | R(5,6)   | 1.5442 | -DE/DX = 0.0 | ! |
| ! R14 | R(5,46)  | 1.4553 | -DE/DX = 0.0 | ! |
| ! R15 | R(5,61)  | 1.4235 | -DE/DX = 0.0 | ! |
| ! R16 | R(6,26)  | 1.526  | -DE/DX = 0.0 | ! |
| ! R17 | R(6,42)  | 1.535  | -DE/DX = 0.0 | ! |
| ! R18 | R(6,51)  | 1.5708 | -DE/DX = 0.0 | ! |
| ! R19 | R(8,16)  | 1.5424 | -DE/DX = 0.0 | ! |
| ! R20 | R(8,20)  | 1.5244 | -DE/DX = 0.0 | ! |
| ! R21 | R(8,29)  | 1.5402 | -DE/DX = 0.0 | ! |
| ! R22 | R(8,32)  | 1.5036 | -DE/DX = 0.0 | ! |
| ! R23 | R(9,10)  | 1.0821 | -DE/DX = 0.0 | ! |
| ! R24 | R(9,11)  | 1.4133 | -DE/DX = 0.0 | ! |
| ! R25 | R(9,12)  | 1.5302 | -DE/DX = 0.0 | ! |
| ! R26 | R(9,20)  | 1.4993 | -DE/DX = 0.0 | ! |
| ! R27 | R(11,29) | 1.4287 | -DE/DX = 0.0 | ! |
| ! R28 | R(12,13) | 1.0795 | -DE/DX = 0.0 | ! |
| ! R29 | R(12,60) | 1.4131 | -DE/DX = 0.0 | ! |
| ! R30 | R(14,51) | 1.5041 | -DE/DX = 0.0 | ! |
| ! R31 | R(14,53) | 1.4505 | -DE/DX = 0.0 | ! |
| ! R32 | R(14,57) | 1.341  | -DE/DX = 0.0 | ! |
| ! R33 | R(15,55) | 1.3412 | -DE/DX = 0.0 | ! |
| ! R34 | R(15,57) | 1.3496 | -DE/DX = 0.0 | ! |
| ! R35 | R(16,17) | 1.0861 | -DE/DX = 0.0 | ! |
| ! R36 | R(16,18) | 1.0846 | -DE/DX = 0.0 | ! |
| ! R37 | R(16,19) | 1.0803 | -DE/DX = 0.0 | ! |
| ! R38 | R(20,21) | 1.0878 | -DE/DX = 0.0 | ! |
| ! R39 | R(22,23) | 1.0819 | -DE/DX = 0.0 | ! |
| ! R40 | R(22,24) | 1.0806 | -DE/DX = 0.0 | ! |
| ! R41 | R(22,25) | 1.0807 | -DE/DX = 0.0 | ! |
| ! R42 | R(26,27) | 1.0845 | -DE/DX = 0.0 | ! |
| ! R43 | R(26,28) | 1.0849 | -DE/DX = 0.0 | ! |
| ! R44 | R(26,40) | 1.5158 | -DE/DX = 0.0 | ! |
| ! R45 | R(29,30) | 1.0847 | -DE/DX = 0.0 | ! |
| ! R46 | R(29,31) | 1.0814 | -DE/DX = 0.0 | ! |
| ! R47 | R(32,33) | 1.0783 | -DE/DX = 0.0 | ! |
| ! R48 | R(32,34) | 1.3285 | -DE/DX = 0.0 | ! |
| ! R49 | R(34,35) | 1.0758 | -DE/DX = 0.0 | ! |
| ! R50 | R(36,37) | 1.0824 | -DE/DX = 0.0 | ! |
| ! R51 | R(36,38) | 1.0773 | -DE/DX = 0.0 | ! |
| ! R52 | R(36,39) | 1.0807 | -DE/DX = 0.0 | ! |
| ! R53 | R(40,41) | 1.0706 | -DE/DX = 0.0 | ! |
| ! R54 | R(40,59) | 1.4054 | -DE/DX = 0.0 | ! |
| ! R55 | R(42,43) | 1.084  | -DE/DX = 0.0 | ! |
| ! R56 | R(42,44) | 1.0814 | -DE/DX = 0.0 | ! |
| ! R57 | R(42,45) | 1.0802 | -DE/DX = 0.0 | ! |
| ! R58 | R(46,47) | 1.0744 | -DE/DX = 0.0 | ! |
| ! R59 | R(46,48) | 1.5076 | -DE/DX = 0.0 | ! |

|       |            |          |              |   |
|-------|------------|----------|--------------|---|
| ! R60 | R(46,61)   | 1.4051   | -DE/DX = 0.0 | ! |
| ! R61 | R(48,49)   | 1.0852   | -DE/DX = 0.0 | ! |
| ! R62 | R(48,50)   | 1.0855   | -DE/DX = 0.0 | ! |
| ! R63 | R(48,51)   | 1.5405   | -DE/DX = 0.0 | ! |
| ! R64 | R(51,52)   | 1.0819   | -DE/DX = 0.0 | ! |
| ! R65 | R(53,54)   | 1.0707   | -DE/DX = 0.0 | ! |
| ! R66 | R(53,55)   | 1.3381   | -DE/DX = 0.0 | ! |
| ! R67 | R(55,56)   | 1.0689   | -DE/DX = 0.0 | ! |
| ! R68 | R(57,58)   | 1.0681   | -DE/DX = 0.0 | ! |
| ! R69 | R(60,62)   | 1.3397   | -DE/DX = 0.0 | ! |
| ! R70 | R(62,63)   | 1.503    | -DE/DX = 0.0 | ! |
| ! R71 | R(62,65)   | 1.1873   | -DE/DX = 0.0 | ! |
| ! R72 | R(63,64)   | 1.323    | -DE/DX = 0.0 | ! |
| ! R73 | R(63,71)   | 1.5159   | -DE/DX = 0.0 | ! |
| ! R74 | R(64,66)   | 1.0768   | -DE/DX = 0.0 | ! |
| ! R75 | R(64,67)   | 1.5002   | -DE/DX = 0.0 | ! |
| ! R76 | R(67,68)   | 1.0817   | -DE/DX = 0.0 | ! |
| ! R77 | R(67,69)   | 1.0868   | -DE/DX = 0.0 | ! |
| ! R78 | R(67,70)   | 1.0871   | -DE/DX = 0.0 | ! |
| ! R79 | R(71,72)   | 1.083    | -DE/DX = 0.0 | ! |
| ! R80 | R(71,73)   | 1.0857   | -DE/DX = 0.0 | ! |
| ! R81 | R(71,74)   | 1.0821   | -DE/DX = 0.0 | ! |
| ! A1  | A(2,1,3)   | 115.1538 | -DE/DX = 0.0 | ! |
| ! A2  | A(2,1,20)  | 105.236  | -DE/DX = 0.0 | ! |
| ! A3  | A(2,1,22)  | 104.8093 | -DE/DX = 0.0 | ! |
| ! A4  | A(3,1,20)  | 104.9239 | -DE/DX = 0.0 | ! |
| ! A5  | A(3,1,22)  | 110.4677 | -DE/DX = 0.0 | ! |
| ! A6  | A(20,1,22) | 116.5134 | -DE/DX = 0.0 | ! |
| ! A7  | A(1,2,7)   | 122.1731 | -DE/DX = 0.0 | ! |
| ! A8  | A(1,2,34)  | 119.0297 | -DE/DX = 0.0 | ! |
| ! A9  | A(7,2,34)  | 118.606  | -DE/DX = 0.0 | ! |
| ! A10 | A(1,3,4)   | 117.2546 | -DE/DX = 0.0 | ! |
| ! A11 | A(1,3,40)  | 120.3391 | -DE/DX = 0.0 | ! |
| ! A12 | A(1,3,59)  | 113.6346 | -DE/DX = 0.0 | ! |
| ! A13 | A(4,3,40)  | 119.8618 | -DE/DX = 0.0 | ! |
| ! A14 | A(4,3,59)  | 111.3348 | -DE/DX = 0.0 | ! |
| ! A15 | A(3,4,5)   | 108.0767 | -DE/DX = 0.0 | ! |
| ! A16 | A(3,4,12)  | 116.9148 | -DE/DX = 0.0 | ! |
| ! A17 | A(3,4,36)  | 107.5825 | -DE/DX = 0.0 | ! |
| ! A18 | A(5,4,12)  | 111.259  | -DE/DX = 0.0 | ! |
| ! A19 | A(5,4,36)  | 108.39   | -DE/DX = 0.0 | ! |
| ! A20 | A(12,4,36) | 104.2361 | -DE/DX = 0.0 | ! |
| ! A21 | A(4,5,6)   | 122.516  | -DE/DX = 0.0 | ! |
| ! A22 | A(4,5,46)  | 126.0858 | -DE/DX = 0.0 | ! |
| ! A23 | A(4,5,61)  | 113.5947 | -DE/DX = 0.0 | ! |
| ! A24 | A(6,5,46)  | 108.4312 | -DE/DX = 0.0 | ! |
| ! A25 | A(6,5,61)  | 109.1575 | -DE/DX = 0.0 | ! |
| ! A26 | A(5,6,26)  | 107.1323 | -DE/DX = 0.0 | ! |
| ! A27 | A(5,6,42)  | 114.8607 | -DE/DX = 0.0 | ! |
| ! A28 | A(5,6,51)  | 101.883  | -DE/DX = 0.0 | ! |
| ! A29 | A(26,6,42) | 108.6162 | -DE/DX = 0.0 | ! |
| ! A30 | A(26,6,51) | 113.8653 | -DE/DX = 0.0 | ! |

|       |             |          |              |   |
|-------|-------------|----------|--------------|---|
| ! A31 | A(42,6,51)  | 110.4727 | -DE/DX = 0.0 | ! |
| ! A32 | A(16,8,20)  | 117.8806 | -DE/DX = 0.0 | ! |
| ! A33 | A(16,8,29)  | 108.5431 | -DE/DX = 0.0 | ! |
| ! A34 | A(16,8,32)  | 109.4283 | -DE/DX = 0.0 | ! |
| ! A35 | A(20,8,29)  | 96.4321  | -DE/DX = 0.0 | ! |
| ! A36 | A(20,8,32)  | 106.2487 | -DE/DX = 0.0 | ! |
| ! A37 | A(29,8,32)  | 118.2659 | -DE/DX = 0.0 | ! |
| ! A38 | A(10,9,11)  | 108.5073 | -DE/DX = 0.0 | ! |
| ! A39 | A(10,9,12)  | 109.1246 | -DE/DX = 0.0 | ! |
| ! A40 | A(10,9,20)  | 113.4735 | -DE/DX = 0.0 | ! |
| ! A41 | A(11,9,12)  | 113.1065 | -DE/DX = 0.0 | ! |
| ! A42 | A(11,9,20)  | 103.1494 | -DE/DX = 0.0 | ! |
| ! A43 | A(12,9,20)  | 109.4574 | -DE/DX = 0.0 | ! |
| ! A44 | A(9,11,29)  | 111.2217 | -DE/DX = 0.0 | ! |
| ! A45 | A(4,12,9)   | 110.6951 | -DE/DX = 0.0 | ! |
| ! A46 | A(4,12,13)  | 106.8893 | -DE/DX = 0.0 | ! |
| ! A47 | A(4,12,60)  | 111.457  | -DE/DX = 0.0 | ! |
| ! A48 | A(9,12,13)  | 110.1609 | -DE/DX = 0.0 | ! |
| ! A49 | A(9,12,60)  | 108.7044 | -DE/DX = 0.0 | ! |
| ! A50 | A(13,12,60) | 108.9106 | -DE/DX = 0.0 | ! |
| ! A51 | A(51,14,53) | 126.0928 | -DE/DX = 0.0 | ! |
| ! A52 | A(51,14,57) | 129.1716 | -DE/DX = 0.0 | ! |
| ! A53 | A(53,14,57) | 104.7043 | -DE/DX = 0.0 | ! |
| ! A54 | A(55,15,57) | 107.1499 | -DE/DX = 0.0 | ! |
| ! A55 | A(8,16,17)  | 108.8652 | -DE/DX = 0.0 | ! |
| ! A56 | A(8,16,18)  | 111.4173 | -DE/DX = 0.0 | ! |
| ! A57 | A(8,16,19)  | 112.6197 | -DE/DX = 0.0 | ! |
| ! A58 | A(17,16,18) | 107.5584 | -DE/DX = 0.0 | ! |
| ! A59 | A(17,16,19) | 107.5116 | -DE/DX = 0.0 | ! |
| ! A60 | A(18,16,19) | 108.6716 | -DE/DX = 0.0 | ! |
| ! A61 | A(1,20,8)   | 121.0073 | -DE/DX = 0.0 | ! |
| ! A62 | A(1,20,9)   | 118.522  | -DE/DX = 0.0 | ! |
| ! A63 | A(1,20,21)  | 103.9894 | -DE/DX = 0.0 | ! |
| ! A64 | A(8,20,9)   | 103.9439 | -DE/DX = 0.0 | ! |
| ! A65 | A(8,20,21)  | 102.9416 | -DE/DX = 0.0 | ! |
| ! A66 | A(9,20,21)  | 104.1273 | -DE/DX = 0.0 | ! |
| ! A67 | A(1,22,23)  | 111.2058 | -DE/DX = 0.0 | ! |
| ! A68 | A(1,22,24)  | 112.4545 | -DE/DX = 0.0 | ! |
| ! A69 | A(1,22,25)  | 109.2493 | -DE/DX = 0.0 | ! |
| ! A70 | A(23,22,24) | 107.5329 | -DE/DX = 0.0 | ! |
| ! A71 | A(23,22,25) | 107.5345 | -DE/DX = 0.0 | ! |
| ! A72 | A(24,22,25) | 108.7106 | -DE/DX = 0.0 | ! |
| ! A73 | A(6,26,27)  | 110.5061 | -DE/DX = 0.0 | ! |
| ! A74 | A(6,26,28)  | 110.915  | -DE/DX = 0.0 | ! |
| ! A75 | A(6,26,40)  | 111.6304 | -DE/DX = 0.0 | ! |
| ! A76 | A(27,26,28) | 107.4709 | -DE/DX = 0.0 | ! |
| ! A77 | A(27,26,40) | 108.7293 | -DE/DX = 0.0 | ! |
| ! A78 | A(28,26,40) | 107.4383 | -DE/DX = 0.0 | ! |
| ! A79 | A(8,29,11)  | 104.4819 | -DE/DX = 0.0 | ! |
| ! A80 | A(8,29,30)  | 111.9908 | -DE/DX = 0.0 | ! |
| ! A81 | A(8,29,31)  | 113.6619 | -DE/DX = 0.0 | ! |
| ! A82 | A(11,29,30) | 109.4335 | -DE/DX = 0.0 | ! |

|        |             |          |              |   |
|--------|-------------|----------|--------------|---|
| ! A83  | A(11,29,31) | 107.9166 | -DE/DX = 0.0 | ! |
| ! A84  | A(30,29,31) | 109.1339 | -DE/DX = 0.0 | ! |
| ! A85  | A(8,32,33)  | 119.7061 | -DE/DX = 0.0 | ! |
| ! A86  | A(8,32,34)  | 120.4528 | -DE/DX = 0.0 | ! |
| ! A87  | A(33,32,34) | 119.7329 | -DE/DX = 0.0 | ! |
| ! A88  | A(2,34,32)  | 124.9802 | -DE/DX = 0.0 | ! |
| ! A89  | A(2,34,35)  | 113.7128 | -DE/DX = 0.0 | ! |
| ! A90  | A(32,34,35) | 121.1452 | -DE/DX = 0.0 | ! |
| ! A91  | A(4,36,37)  | 110.4219 | -DE/DX = 0.0 | ! |
| ! A92  | A(4,36,38)  | 110.9466 | -DE/DX = 0.0 | ! |
| ! A93  | A(4,36,39)  | 111.3694 | -DE/DX = 0.0 | ! |
| ! A94  | A(37,36,38) | 108.1825 | -DE/DX = 0.0 | ! |
| ! A95  | A(37,36,39) | 107.2528 | -DE/DX = 0.0 | ! |
| ! A96  | A(38,36,39) | 108.5338 | -DE/DX = 0.0 | ! |
| ! A97  | A(3,40,26)  | 125.1561 | -DE/DX = 0.0 | ! |
| ! A98  | A(3,40,41)  | 116.9571 | -DE/DX = 0.0 | ! |
| ! A99  | A(26,40,41) | 114.4095 | -DE/DX = 0.0 | ! |
| ! A100 | A(26,40,59) | 115.9652 | -DE/DX = 0.0 | ! |
| ! A101 | A(41,40,59) | 112.7468 | -DE/DX = 0.0 | ! |
| ! A102 | A(6,42,43)  | 108.5321 | -DE/DX = 0.0 | ! |
| ! A103 | A(6,42,44)  | 112.5203 | -DE/DX = 0.0 | ! |
| ! A104 | A(6,42,45)  | 112.1348 | -DE/DX = 0.0 | ! |
| ! A105 | A(43,42,44) | 107.9804 | -DE/DX = 0.0 | ! |
| ! A106 | A(43,42,45) | 107.8314 | -DE/DX = 0.0 | ! |
| ! A107 | A(44,42,45) | 107.6632 | -DE/DX = 0.0 | ! |
| ! A108 | A(5,46,47)  | 123.9077 | -DE/DX = 0.0 | ! |
| ! A109 | A(5,46,48)  | 110.0212 | -DE/DX = 0.0 | ! |
| ! A110 | A(47,46,48) | 120.8359 | -DE/DX = 0.0 | ! |
| ! A111 | A(47,46,61) | 115.2615 | -DE/DX = 0.0 | ! |
| ! A112 | A(48,46,61) | 111.5456 | -DE/DX = 0.0 | ! |
| ! A113 | A(46,48,49) | 112.3782 | -DE/DX = 0.0 | ! |
| ! A114 | A(46,48,50) | 109.4427 | -DE/DX = 0.0 | ! |
| ! A115 | A(46,48,51) | 102.7788 | -DE/DX = 0.0 | ! |
| ! A116 | A(49,48,50) | 107.9181 | -DE/DX = 0.0 | ! |
| ! A117 | A(49,48,51) | 111.9371 | -DE/DX = 0.0 | ! |
| ! A118 | A(50,48,51) | 112.383  | -DE/DX = 0.0 | ! |
| ! A119 | A(6,51,14)  | 116.8705 | -DE/DX = 0.0 | ! |
| ! A120 | A(6,51,48)  | 104.5425 | -DE/DX = 0.0 | ! |
| ! A121 | A(6,51,52)  | 106.7389 | -DE/DX = 0.0 | ! |
| ! A122 | A(14,51,48) | 114.8714 | -DE/DX = 0.0 | ! |
| ! A123 | A(14,51,52) | 106.3982 | -DE/DX = 0.0 | ! |
| ! A124 | A(48,51,52) | 106.7767 | -DE/DX = 0.0 | ! |
| ! A125 | A(14,53,54) | 127.4942 | -DE/DX = 0.0 | ! |
| ! A126 | A(14,53,55) | 106.2381 | -DE/DX = 0.0 | ! |
| ! A127 | A(54,53,55) | 126.2662 | -DE/DX = 0.0 | ! |
| ! A128 | A(15,55,53) | 110.6455 | -DE/DX = 0.0 | ! |
| ! A129 | A(15,55,56) | 116.6182 | -DE/DX = 0.0 | ! |
| ! A130 | A(53,55,56) | 132.7354 | -DE/DX = 0.0 | ! |
| ! A131 | A(14,57,15) | 111.2607 | -DE/DX = 0.0 | ! |
| ! A132 | A(14,57,58) | 132.9729 | -DE/DX = 0.0 | ! |
| ! A133 | A(15,57,58) | 115.7663 | -DE/DX = 0.0 | ! |
| ! A134 | A(12,60,62) | 123.4264 | -DE/DX = 0.0 | ! |

|        |               |           |              |   |
|--------|---------------|-----------|--------------|---|
| ! A135 | A(60,62,63)   | 119.1473  | -DE/DX = 0.0 | ! |
| ! A136 | A(60,62,65)   | 117.9395  | -DE/DX = 0.0 | ! |
| ! A137 | A(63,62,65)   | 122.6884  | -DE/DX = 0.0 | ! |
| ! A138 | A(62,63,64)   | 117.195   | -DE/DX = 0.0 | ! |
| ! A139 | A(62,63,71)   | 117.3833  | -DE/DX = 0.0 | ! |
| ! A140 | A(64,63,71)   | 125.2904  | -DE/DX = 0.0 | ! |
| ! A141 | A(63,64,66)   | 117.5683  | -DE/DX = 0.0 | ! |
| ! A142 | A(63,64,67)   | 127.2197  | -DE/DX = 0.0 | ! |
| ! A143 | A(66,64,67)   | 115.2014  | -DE/DX = 0.0 | ! |
| ! A144 | A(64,67,68)   | 113.1831  | -DE/DX = 0.0 | ! |
| ! A145 | A(64,67,69)   | 109.7504  | -DE/DX = 0.0 | ! |
| ! A146 | A(64,67,70)   | 109.9132  | -DE/DX = 0.0 | ! |
| ! A147 | A(68,67,69)   | 108.2422  | -DE/DX = 0.0 | ! |
| ! A148 | A(68,67,70)   | 108.5522  | -DE/DX = 0.0 | ! |
| ! A149 | A(69,67,70)   | 106.9961  | -DE/DX = 0.0 | ! |
| ! A150 | A(63,71,72)   | 110.8324  | -DE/DX = 0.0 | ! |
| ! A151 | A(63,71,73)   | 112.5587  | -DE/DX = 0.0 | ! |
| ! A152 | A(63,71,74)   | 110.3331  | -DE/DX = 0.0 | ! |
| ! A153 | A(72,71,73)   | 108.0379  | -DE/DX = 0.0 | ! |
| ! A154 | A(72,71,74)   | 107.2605  | -DE/DX = 0.0 | ! |
| ! A155 | A(73,71,74)   | 107.6129  | -DE/DX = 0.0 | ! |
| ! D1   | D(3,1,2,7)    | -56.793   | -DE/DX = 0.0 | ! |
| ! D2   | D(3,1,2,34)   | 128.3036  | -DE/DX = 0.0 | ! |
| ! D3   | D(20,1,2,7)   | -171.8032 | -DE/DX = 0.0 | ! |
| ! D4   | D(20,1,2,34)  | 13.2934   | -DE/DX = 0.0 | ! |
| ! D5   | D(22,1,2,7)   | 64.7902   | -DE/DX = 0.0 | ! |
| ! D6   | D(22,1,2,34)  | -110.1132 | -DE/DX = 0.0 | ! |
| ! D7   | D(2,1,3,4)    | -155.7271 | -DE/DX = 0.0 | ! |
| ! D8   | D(2,1,3,40)   | 6.162     | -DE/DX = 0.0 | ! |
| ! D9   | D(2,1,3,59)   | 72.0397   | -DE/DX = 0.0 | ! |
| ! D10  | D(20,1,3,4)   | -40.5374  | -DE/DX = 0.0 | ! |
| ! D11  | D(20,1,3,40)  | 121.3518  | -DE/DX = 0.0 | ! |
| ! D12  | D(20,1,3,59)  | -172.7706 | -DE/DX = 0.0 | ! |
| ! D13  | D(22,1,3,4)   | 85.8044   | -DE/DX = 0.0 | ! |
| ! D14  | D(22,1,3,40)  | -112.3065 | -DE/DX = 0.0 | ! |
| ! D15  | D(22,1,3,59)  | -46.4288  | -DE/DX = 0.0 | ! |
| ! D16  | D(2,1,20,8)   | -48.9288  | -DE/DX = 0.0 | ! |
| ! D17  | D(2,1,20,9)   | -179.2158 | -DE/DX = 0.0 | ! |
| ! D18  | D(2,1,20,21)  | 65.8438   | -DE/DX = 0.0 | ! |
| ! D19  | D(3,1,20,8)   | -170.8333 | -DE/DX = 0.0 | ! |
| ! D20  | D(3,1,20,9)   | 58.8797   | -DE/DX = 0.0 | ! |
| ! D21  | D(3,1,20,21)  | -56.0607  | -DE/DX = 0.0 | ! |
| ! D22  | D(22,1,20,8)  | 66.6611   | -DE/DX = 0.0 | ! |
| ! D23  | D(22,1,20,9)  | -63.6259  | -DE/DX = 0.0 | ! |
| ! D24  | D(22,1,20,21) | -178.5662 | -DE/DX = 0.0 | ! |
| ! D25  | D(2,1,22,23)  | 38.7537   | -DE/DX = 0.0 | ! |
| ! D26  | D(2,1,22,24)  | 159.4171  | -DE/DX = 0.0 | ! |
| ! D27  | D(2,1,22,25)  | -79.7873  | -DE/DX = 0.0 | ! |
| ! D28  | D(3,1,22,23)  | 163.3617  | -DE/DX = 0.0 | ! |
| ! D29  | D(3,1,22,24)  | -75.9749  | -DE/DX = 0.0 | ! |
| ! D30  | D(3,1,22,25)  | 44.8208   | -DE/DX = 0.0 | ! |
| ! D31  | D(20,1,22,23) | -77.074   | -DE/DX = 0.0 | ! |

|       |               |           |              |   |
|-------|---------------|-----------|--------------|---|
| ! D32 | D(20,1,22,24) | 43.5894   | -DE/DX = 0.0 | ! |
| ! D33 | D(20,1,22,25) | 164.385   | -DE/DX = 0.0 | ! |
| ! D34 | D(1,2,34,32)  | 9.9453    | -DE/DX = 0.0 | ! |
| ! D35 | D(1,2,34,35)  | -174.6536 | -DE/DX = 0.0 | ! |
| ! D36 | D(7,2,34,32)  | -165.1413 | -DE/DX = 0.0 | ! |
| ! D37 | D(7,2,34,35)  | 10.2598   | -DE/DX = 0.0 | ! |
| ! D38 | D(1,3,4,5)    | 161.7983  | -DE/DX = 0.0 | ! |
| ! D39 | D(1,3,4,12)   | 35.3967   | -DE/DX = 0.0 | ! |
| ! D40 | D(1,3,4,36)   | -81.3581  | -DE/DX = 0.0 | ! |
| ! D41 | D(40,3,4,5)   | -0.1811   | -DE/DX = 0.0 | ! |
| ! D42 | D(40,3,4,12)  | -126.5827 | -DE/DX = 0.0 | ! |
| ! D43 | D(40,3,4,36)  | 116.6625  | -DE/DX = 0.0 | ! |
| ! D44 | D(59,3,4,5)   | -64.9386  | -DE/DX = 0.0 | ! |
| ! D45 | D(59,3,4,12)  | 168.6598  | -DE/DX = 0.0 | ! |
| ! D46 | D(59,3,4,36)  | 51.905    | -DE/DX = 0.0 | ! |
| ! D47 | D(1,3,40,26)  | -158.2857 | -DE/DX = 0.0 | ! |
| ! D48 | D(1,3,40,41)  | -0.5791   | -DE/DX = 0.0 | ! |
| ! D49 | D(4,3,40,26)  | 3.1327    | -DE/DX = 0.0 | ! |
| ! D50 | D(4,3,40,41)  | 160.8394  | -DE/DX = 0.0 | ! |
| ! D51 | D(3,4,5,6)    | -32.6051  | -DE/DX = 0.0 | ! |
| ! D52 | D(3,4,5,46)   | 169.1834  | -DE/DX = 0.0 | ! |
| ! D53 | D(3,4,5,61)   | 102.0716  | -DE/DX = 0.0 | ! |
| ! D54 | D(12,4,5,6)   | 97.0322   | -DE/DX = 0.0 | ! |
| ! D55 | D(12,4,5,46)  | -61.1793  | -DE/DX = 0.0 | ! |
| ! D56 | D(12,4,5,61)  | -128.2911 | -DE/DX = 0.0 | ! |
| ! D57 | D(36,4,5,6)   | -148.9247 | -DE/DX = 0.0 | ! |
| ! D58 | D(36,4,5,46)  | 52.8638   | -DE/DX = 0.0 | ! |
| ! D59 | D(36,4,5,61)  | -14.2481  | -DE/DX = 0.0 | ! |
| ! D60 | D(3,4,12,9)   | -38.5421  | -DE/DX = 0.0 | ! |
| ! D61 | D(3,4,12,13)  | -158.5247 | -DE/DX = 0.0 | ! |
| ! D62 | D(3,4,12,60)  | 82.5767   | -DE/DX = 0.0 | ! |
| ! D63 | D(5,4,12,9)   | -163.3551 | -DE/DX = 0.0 | ! |
| ! D64 | D(5,4,12,13)  | 76.6623   | -DE/DX = 0.0 | ! |
| ! D65 | D(5,4,12,60)  | -42.2363  | -DE/DX = 0.0 | ! |
| ! D66 | D(36,4,12,9)  | 80.0326   | -DE/DX = 0.0 | ! |
| ! D67 | D(36,4,12,13) | -39.95    | -DE/DX = 0.0 | ! |
| ! D68 | D(36,4,12,60) | -158.8486 | -DE/DX = 0.0 | ! |
| ! D69 | D(3,4,36,37)  | -169.1227 | -DE/DX = 0.0 | ! |
| ! D70 | D(3,4,36,38)  | -49.1848  | -DE/DX = 0.0 | ! |
| ! D71 | D(3,4,36,39)  | 71.8302   | -DE/DX = 0.0 | ! |
| ! D72 | D(5,4,36,37)  | -52.4839  | -DE/DX = 0.0 | ! |
| ! D73 | D(5,4,36,38)  | 67.454    | -DE/DX = 0.0 | ! |
| ! D74 | D(5,4,36,39)  | -171.531  | -DE/DX = 0.0 | ! |
| ! D75 | D(12,4,36,37) | 66.107    | -DE/DX = 0.0 | ! |
| ! D76 | D(12,4,36,38) | -173.9551 | -DE/DX = 0.0 | ! |
| ! D77 | D(12,4,36,39) | -52.9401  | -DE/DX = 0.0 | ! |
| ! D78 | D(4,5,6,26)   | 59.6444   | -DE/DX = 0.0 | ! |
| ! D79 | D(4,5,6,42)   | -61.086   | -DE/DX = 0.0 | ! |
| ! D80 | D(4,5,6,51)   | 179.4798  | -DE/DX = 0.0 | ! |
| ! D81 | D(46,5,6,26)  | -138.788  | -DE/DX = 0.0 | ! |
| ! D82 | D(46,5,6,42)  | 100.4817  | -DE/DX = 0.0 | ! |
| ! D83 | D(46,5,6,51)  | -18.9526  | -DE/DX = 0.0 | ! |



|        |               |           |              |   |
|--------|---------------|-----------|--------------|---|
| ! D84  | D(61,5,6,26)  | -76.738   | -DE/DX = 0.0 | ! |
| ! D85  | D(61,5,6,42)  | 162.5316  | -DE/DX = 0.0 | ! |
| ! D86  | D(61,5,6,51)  | 43.0974   | -DE/DX = 0.0 | ! |
| ! D87  | D(4,5,46,47)  | 4.0179    | -DE/DX = 0.0 | ! |
| ! D88  | D(4,5,46,48)  | 158.4761  | -DE/DX = 0.0 | ! |
| ! D89  | D(6,5,46,47)  | -156.7182 | -DE/DX = 0.0 | ! |
| ! D90  | D(6,5,46,48)  | -2.26     | -DE/DX = 0.0 | ! |
| ! D91  | D(5,6,26,27)  | -170.7155 | -DE/DX = 0.0 | ! |
| ! D92  | D(5,6,26,28)  | 70.2018   | -DE/DX = 0.0 | ! |
| ! D93  | D(5,6,26,40)  | -49.5776  | -DE/DX = 0.0 | ! |
| ! D94  | D(42,6,26,27) | -46.1004  | -DE/DX = 0.0 | ! |
| ! D95  | D(42,6,26,28) | -165.1831 | -DE/DX = 0.0 | ! |
| ! D96  | D(42,6,26,40) | 75.0375   | -DE/DX = 0.0 | ! |
| ! D97  | D(51,6,26,27) | 77.4456   | -DE/DX = 0.0 | ! |
| ! D98  | D(51,6,26,28) | -41.6371  | -DE/DX = 0.0 | ! |
| ! D99  | D(51,6,26,40) | -161.4165 | -DE/DX = 0.0 | ! |
| ! D100 | D(5,6,42,43)  | -179.2159 | -DE/DX = 0.0 | ! |
| ! D101 | D(5,6,42,44)  | -59.7806  | -DE/DX = 0.0 | ! |
| ! D102 | D(5,6,42,45)  | 61.7706   | -DE/DX = 0.0 | ! |
| ! D103 | D(26,6,42,43) | 60.8719   | -DE/DX = 0.0 | ! |
| ! D104 | D(26,6,42,44) | -179.6927 | -DE/DX = 0.0 | ! |
| ! D105 | D(26,6,42,45) | -58.1415  | -DE/DX = 0.0 | ! |
| ! D106 | D(51,6,42,43) | -64.682   | -DE/DX = 0.0 | ! |
| ! D107 | D(51,6,42,44) | 54.7533   | -DE/DX = 0.0 | ! |
| ! D108 | D(51,6,42,45) | 176.3045  | -DE/DX = 0.0 | ! |
| ! D109 | D(5,6,51,14)  | 160.9117  | -DE/DX = 0.0 | ! |
| ! D110 | D(5,6,51,48)  | 32.7026   | -DE/DX = 0.0 | ! |
| ! D111 | D(5,6,51,52)  | -80.2152  | -DE/DX = 0.0 | ! |
| ! D112 | D(26,6,51,14) | -84.1103  | -DE/DX = 0.0 | ! |
| ! D113 | D(26,6,51,48) | 147.6806  | -DE/DX = 0.0 | ! |
| ! D114 | D(26,6,51,52) | 34.7628   | -DE/DX = 0.0 | ! |
| ! D115 | D(42,6,51,14) | 38.4223   | -DE/DX = 0.0 | ! |
| ! D116 | D(42,6,51,48) | -89.7868  | -DE/DX = 0.0 | ! |
| ! D117 | D(42,6,51,52) | 157.2954  | -DE/DX = 0.0 | ! |
| ! D118 | D(20,8,16,17) | -173.6877 | -DE/DX = 0.0 | ! |
| ! D119 | D(20,8,16,18) | -55.232   | -DE/DX = 0.0 | ! |
| ! D120 | D(20,8,16,19) | 67.1785   | -DE/DX = 0.0 | ! |
| ! D121 | D(29,8,16,17) | -65.5602  | -DE/DX = 0.0 | ! |
| ! D122 | D(29,8,16,18) | 52.8955   | -DE/DX = 0.0 | ! |
| ! D123 | D(29,8,16,19) | 175.306   | -DE/DX = 0.0 | ! |
| ! D124 | D(32,8,16,17) | 64.8282   | -DE/DX = 0.0 | ! |
| ! D125 | D(32,8,16,18) | -176.7161 | -DE/DX = 0.0 | ! |
| ! D126 | D(32,8,16,19) | -54.3056  | -DE/DX = 0.0 | ! |
| ! D127 | D(16,8,20,1)  | -65.5414  | -DE/DX = 0.0 | ! |
| ! D128 | D(16,8,20,9)  | 70.7821   | -DE/DX = 0.0 | ! |
| ! D129 | D(16,8,20,21) | 179.1488  | -DE/DX = 0.0 | ! |
| ! D130 | D(29,8,20,1)  | 179.5167  | -DE/DX = 0.0 | ! |
| ! D131 | D(29,8,20,9)  | -44.1598  | -DE/DX = 0.0 | ! |
| ! D132 | D(29,8,20,21) | 64.2069   | -DE/DX = 0.0 | ! |
| ! D133 | D(32,8,20,1)  | 57.562    | -DE/DX = 0.0 | ! |
| ! D134 | D(32,8,20,9)  | -166.1145 | -DE/DX = 0.0 | ! |
| ! D135 | D(32,8,20,21) | -57.7478  | -DE/DX = 0.0 | ! |

|                       |           |              |   |
|-----------------------|-----------|--------------|---|
| ! D136 D(16,8,29,11)  | -83.7169  | -DE/DX = 0.0 | ! |
| ! D137 D(16,8,29,30)  | 157.9304  | -DE/DX = 0.0 | ! |
| ! D138 D(16,8,29,31)  | 33.6742   | -DE/DX = 0.0 | ! |
| ! D139 D(20,8,29,11)  | 38.5711   | -DE/DX = 0.0 | ! |
| ! D140 D(20,8,29,30)  | -79.7815  | -DE/DX = 0.0 | ! |
| ! D141 D(20,8,29,31)  | 155.9623  | -DE/DX = 0.0 | ! |
| ! D142 D(32,8,29,11)  | 150.9243  | -DE/DX = 0.0 | ! |
| ! D143 D(32,8,29,30)  | 32.5717   | -DE/DX = 0.0 | ! |
| ! D144 D(32,8,29,31)  | -91.6845  | -DE/DX = 0.0 | ! |
| ! D145 D(16,8,32,33)  | -76.2573  | -DE/DX = 0.0 | ! |
| ! D146 D(16,8,32,34)  | 99.952    | -DE/DX = 0.0 | ! |
| ! D147 D(20,8,32,33)  | 155.4781  | -DE/DX = 0.0 | ! |
| ! D148 D(20,8,32,34)  | -28.3125  | -DE/DX = 0.0 | ! |
| ! D149 D(29,8,32,33)  | 48.6687   | -DE/DX = 0.0 | ! |
| ! D150 D(29,8,32,34)  | -135.1219 | -DE/DX = 0.0 | ! |
| ! D151 D(10,9,11,29)  | 111.8478  | -DE/DX = 0.0 | ! |
| ! D152 D(12,9,11,29)  | -126.924  | -DE/DX = 0.0 | ! |
| ! D153 D(20,9,11,29)  | -8.7866   | -DE/DX = 0.0 | ! |
| ! D154 D(10,9,12,4)   | -74.1898  | -DE/DX = 0.0 | ! |
| ! D155 D(10,9,12,13)  | 43.8143   | -DE/DX = 0.0 | ! |
| ! D156 D(10,9,12,60)  | 163.0762  | -DE/DX = 0.0 | ! |
| ! D157 D(11,9,12,4)   | 164.9314  | -DE/DX = 0.0 | ! |
| ! D158 D(11,9,12,13)  | -77.0646  | -DE/DX = 0.0 | ! |
| ! D159 D(11,9,12,60)  | 42.1974   | -DE/DX = 0.0 | ! |
| ! D160 D(20,9,12,4)   | 50.5349   | -DE/DX = 0.0 | ! |
| ! D161 D(20,9,12,13)  | 168.5389  | -DE/DX = 0.0 | ! |
| ! D162 D(20,9,12,60)  | -72.1991  | -DE/DX = 0.0 | ! |
| ! D163 D(10,9,20,1)   | 54.9534   | -DE/DX = 0.0 | ! |
| ! D164 D(10,9,20,8)   | -82.6962  | -DE/DX = 0.0 | ! |
| ! D165 D(10,9,20,21)  | 169.8194  | -DE/DX = 0.0 | ! |
| ! D166 D(11,9,20,1)   | 172.1364  | -DE/DX = 0.0 | ! |
| ! D167 D(11,9,20,8)   | 34.4867   | -DE/DX = 0.0 | ! |
| ! D168 D(11,9,20,21)  | -72.9976  | -DE/DX = 0.0 | ! |
| ! D169 D(12,9,20,1)   | -67.203   | -DE/DX = 0.0 | ! |
| ! D170 D(12,9,20,8)   | 155.1473  | -DE/DX = 0.0 | ! |
| ! D171 D(12,9,20,21)  | 47.663    | -DE/DX = 0.0 | ! |
| ! D172 D(9,11,29,8)   | -19.909   | -DE/DX = 0.0 | ! |
| ! D173 D(9,11,29,30)  | 100.1727  | -DE/DX = 0.0 | ! |
| ! D174 D(9,11,29,31)  | -141.1836 | -DE/DX = 0.0 | ! |
| ! D175 D(4,12,60,62)  | 163.4066  | -DE/DX = 0.0 | ! |
| ! D176 D(9,12,60,62)  | -74.3203  | -DE/DX = 0.0 | ! |
| ! D177 D(13,12,60,62) | 45.721    | -DE/DX = 0.0 | ! |
| ! D178 D(53,14,51,6)  | 73.6315   | -DE/DX = 0.0 | ! |
| ! D179 D(53,14,51,48) | -163.3334 | -DE/DX = 0.0 | ! |
| ! D180 D(53,14,51,52) | -45.4248  | -DE/DX = 0.0 | ! |
| ! D181 D(57,14,51,6)  | -108.7185 | -DE/DX = 0.0 | ! |
| ! D182 D(57,14,51,48) | 14.3165   | -DE/DX = 0.0 | ! |
| ! D183 D(57,14,51,52) | 132.2252  | -DE/DX = 0.0 | ! |
| ! D184 D(51,14,53,54) | -1.0996   | -DE/DX = 0.0 | ! |
| ! D185 D(51,14,53,55) | 178.4808  | -DE/DX = 0.0 | ! |
| ! D186 D(57,14,53,54) | -179.2162 | -DE/DX = 0.0 | ! |
| ! D187 D(57,14,53,55) | 0.3641    | -DE/DX = 0.0 | ! |

|        |                |           |              |   |
|--------|----------------|-----------|--------------|---|
| ! D188 | D(51,14,57,15) | -178.4028 | -DE/DX = 0.0 | ! |
| ! D189 | D(51,14,57,58) | 1.4817    | -DE/DX = 0.0 | ! |
| ! D190 | D(53,14,57,15) | -0.3658   | -DE/DX = 0.0 | ! |
| ! D191 | D(53,14,57,58) | 179.5186  | -DE/DX = 0.0 | ! |
| ! D192 | D(57,15,55,53) | 0.0207    | -DE/DX = 0.0 | ! |
| ! D193 | D(57,15,55,56) | 179.7192  | -DE/DX = 0.0 | ! |
| ! D194 | D(55,15,57,14) | 0.2319    | -DE/DX = 0.0 | ! |
| ! D195 | D(55,15,57,58) | -179.6742 | -DE/DX = 0.0 | ! |
| ! D196 | D(6,26,40,3)   | 24.0065   | -DE/DX = 0.0 | ! |
| ! D197 | D(6,26,40,41)  | -134.1964 | -DE/DX = 0.0 | ! |
| ! D198 | D(6,26,40,59)  | 91.9128   | -DE/DX = 0.0 | ! |
| ! D199 | D(27,26,40,3)  | 146.1717  | -DE/DX = 0.0 | ! |
| ! D200 | D(27,26,40,41) | -12.0311  | -DE/DX = 0.0 | ! |
| ! D201 | D(27,26,40,59) | -145.922  | -DE/DX = 0.0 | ! |
| ! D202 | D(28,26,40,3)  | -97.8022  | -DE/DX = 0.0 | ! |
| ! D203 | D(28,26,40,41) | 103.995   | -DE/DX = 0.0 | ! |
| ! D204 | D(28,26,40,59) | -29.8959  | -DE/DX = 0.0 | ! |
| ! D205 | D(8,32,34,2)   | -1.2518   | -DE/DX = 0.0 | ! |
| ! D206 | D(8,32,34,35)  | -176.3313 | -DE/DX = 0.0 | ! |
| ! D207 | D(33,32,34,2)  | 174.9565  | -DE/DX = 0.0 | ! |
| ! D208 | D(33,32,34,35) | -0.123    | -DE/DX = 0.0 | ! |
| ! D209 | D(5,46,48,49)  | 143.5014  | -DE/DX = 0.0 | ! |
| ! D210 | D(5,46,48,50)  | -96.6197  | -DE/DX = 0.0 | ! |
| ! D211 | D(5,46,48,51)  | 22.9935   | -DE/DX = 0.0 | ! |
| ! D212 | D(47,46,48,49) | -61.1286  | -DE/DX = 0.0 | ! |
| ! D213 | D(47,46,48,50) | 58.7503   | -DE/DX = 0.0 | ! |
| ! D214 | D(47,46,48,51) | 178.3635  | -DE/DX = 0.0 | ! |
| ! D215 | D(61,46,48,49) | 79.2294   | -DE/DX = 0.0 | ! |
| ! D216 | D(61,46,48,50) | -160.8917 | -DE/DX = 0.0 | ! |
| ! D217 | D(61,46,48,51) | -41.2785  | -DE/DX = 0.0 | ! |
| ! D218 | D(46,48,51,6)  | -34.2585  | -DE/DX = 0.0 | ! |
| ! D219 | D(46,48,51,14) | -163.6729 | -DE/DX = 0.0 | ! |
| ! D220 | D(46,48,51,52) | 78.6323   | -DE/DX = 0.0 | ! |
| ! D221 | D(49,48,51,6)  | -155.0694 | -DE/DX = 0.0 | ! |
| ! D222 | D(49,48,51,14) | 75.5162   | -DE/DX = 0.0 | ! |
| ! D223 | D(49,48,51,52) | -42.1786  | -DE/DX = 0.0 | ! |
| ! D224 | D(50,48,51,6)  | 83.2921   | -DE/DX = 0.0 | ! |
| ! D225 | D(50,48,51,14) | -46.1223  | -DE/DX = 0.0 | ! |
| ! D226 | D(50,48,51,52) | -163.8171 | -DE/DX = 0.0 | ! |
| ! D227 | D(14,53,55,15) | -0.2397   | -DE/DX = 0.0 | ! |
| ! D228 | D(14,53,55,56) | -179.8726 | -DE/DX = 0.0 | ! |
| ! D229 | D(54,53,55,15) | 179.3474  | -DE/DX = 0.0 | ! |
| ! D230 | D(54,53,55,56) | -0.2856   | -DE/DX = 0.0 | ! |
| ! D231 | D(12,60,62,63) | -39.6919  | -DE/DX = 0.0 | ! |
| ! D232 | D(12,60,62,65) | 145.6078  | -DE/DX = 0.0 | ! |
| ! D233 | D(60,62,63,64) | 130.513   | -DE/DX = 0.0 | ! |
| ! D234 | D(60,62,63,71) | -53.4296  | -DE/DX = 0.0 | ! |
| ! D235 | D(65,62,63,64) | -55.0508  | -DE/DX = 0.0 | ! |
| ! D236 | D(65,62,63,71) | 121.0066  | -DE/DX = 0.0 | ! |
| ! D237 | D(62,63,64,66) | -2.5448   | -DE/DX = 0.0 | ! |
| ! D238 | D(62,63,64,67) | 178.7043  | -DE/DX = 0.0 | ! |
| ! D239 | D(71,63,64,66) | -178.2552 | -DE/DX = 0.0 | ! |

|        |                |           |              |   |
|--------|----------------|-----------|--------------|---|
| ! D240 | D(71,63,64,67) | 2.9939    | -DE/DX = 0.0 | ! |
| ! D241 | D(62,63,71,72) | -21.2499  | -DE/DX = 0.0 | ! |
| ! D242 | D(62,63,71,73) | 99.8696   | -DE/DX = 0.0 | ! |
| ! D243 | D(62,63,71,74) | -139.9074 | -DE/DX = 0.0 | ! |
| ! D244 | D(64,63,71,72) | 154.4533  | -DE/DX = 0.0 | ! |
| ! D245 | D(64,63,71,73) | -84.4272  | -DE/DX = 0.0 | ! |
| ! D246 | D(64,63,71,74) | 35.7957   | -DE/DX = 0.0 | ! |
| ! D247 | D(63,64,67,68) | 0.7973    | -DE/DX = 0.0 | ! |
| ! D248 | D(63,64,67,69) | 121.8333  | -DE/DX = 0.0 | ! |
| ! D249 | D(63,64,67,70) | -120.7542 | -DE/DX = 0.0 | ! |
| ! D250 | D(66,64,67,68) | -177.9789 | -DE/DX = 0.0 | ! |
| ! D251 | D(66,64,67,69) | -56.9428  | -DE/DX = 0.0 | ! |
| ! D252 | D(66,64,67,70) | 60.4696   | -DE/DX = 0.0 | ! |

### 3. opt=tight b3lyp/6-311++g(d,p) nosymm

-----  
! Optimized Parameters !  
! (Angstroms and Degrees) !

| ! Name | Definition | Value  | Derivative Info. | ! |
|--------|------------|--------|------------------|---|
| ! R1   | R(1,2)     | 1.5603 | -DE/DX = 0.0     | ! |
| ! R2   | R(1,3)     | 1.5811 | -DE/DX = 0.0     | ! |
| ! R3   | R(1,20)    | 1.5221 | -DE/DX = 0.0     | ! |
| ! R4   | R(1,22)    | 1.551  | -DE/DX = 0.0     | ! |
| ! R5   | R(2,7)     | 1.2167 | -DE/DX = 0.0     | ! |
| ! R6   | R(2,34)    | 1.4966 | -DE/DX = 0.0     | ! |
| ! R7   | R(3,4)     | 1.5973 | -DE/DX = 0.0     | ! |
| ! R8   | R(3,40)    | 1.4972 | -DE/DX = 0.0     | ! |
| ! R9   | R(3,59)    | 1.4311 | -DE/DX = 0.0     | ! |
| ! R10  | R(4,5)     | 1.5549 | -DE/DX = 0.0     | ! |
| ! R11  | R(4,12)    | 1.5756 | -DE/DX = 0.0     | ! |
| ! R12  | R(4,36)    | 1.5543 | -DE/DX = 0.0     | ! |
| ! R13  | R(5,6)     | 1.5477 | -DE/DX = 0.0     | ! |
| ! R14  | R(5,46)    | 1.472  | -DE/DX = 0.0     | ! |
| ! R15  | R(5,61)    | 1.4568 | -DE/DX = 0.0     | ! |
| ! R16  | R(6,26)    | 1.5306 | -DE/DX = 0.0     | ! |
| ! R17  | R(6,42)    | 1.5373 | -DE/DX = 0.0     | ! |
| ! R18  | R(6,51)    | 1.581  | -DE/DX = 0.0     | ! |
| ! R19  | R(8,16)    | 1.5477 | -DE/DX = 0.0     | ! |
| ! R20  | R(8,20)    | 1.5348 | -DE/DX = 0.0     | ! |
| ! R21  | R(8,29)    | 1.5479 | -DE/DX = 0.0     | ! |
| ! R22  | R(8,32)    | 1.501  | -DE/DX = 0.0     | ! |
| ! R23  | R(9,10)    | 1.0935 | -DE/DX = 0.0     | ! |
| ! R24  | R(9,11)    | 1.4389 | -DE/DX = 0.0     | ! |
| ! R25  | R(9,12)    | 1.5357 | -DE/DX = 0.0     | ! |
| ! R26  | R(9,20)    | 1.5044 | -DE/DX = 0.0     | ! |
| ! R27  | R(11,29)   | 1.453  | -DE/DX = 0.0     | ! |
| ! R28  | R(12,13)   | 1.0914 | -DE/DX = 0.0     | ! |
| ! R29  | R(12,60)   | 1.4339 | -DE/DX = 0.0     | ! |

|       |          |        |              |   |
|-------|----------|--------|--------------|---|
| ! R30 | R(14,51) | 1.5003 | -DE/DX = 0.0 | ! |
| ! R31 | R(14,53) | 1.4428 | -DE/DX = 0.0 | ! |
| ! R32 | R(14,57) | 1.3621 | -DE/DX = 0.0 | ! |
| ! R33 | R(15,55) | 1.3609 | -DE/DX = 0.0 | ! |
| ! R34 | R(15,57) | 1.3659 | -DE/DX = 0.0 | ! |
| ! R35 | R(16,17) | 1.0941 | -DE/DX = 0.0 | ! |
| ! R36 | R(16,18) | 1.0926 | -DE/DX = 0.0 | ! |
| ! R37 | R(16,19) | 1.0884 | -DE/DX = 0.0 | ! |
| ! R38 | R(20,21) | 1.0979 | -DE/DX = 0.0 | ! |
| ! R39 | R(22,23) | 1.0902 | -DE/DX = 0.0 | ! |
| ! R40 | R(22,24) | 1.0907 | -DE/DX = 0.0 | ! |
| ! R41 | R(22,25) | 1.0894 | -DE/DX = 0.0 | ! |
| ! R42 | R(26,27) | 1.0937 | -DE/DX = 0.0 | ! |
| ! R43 | R(26,28) | 1.0944 | -DE/DX = 0.0 | ! |
| ! R44 | R(26,40) | 1.519  | -DE/DX = 0.0 | ! |
| ! R45 | R(29,30) | 1.095  | -DE/DX = 0.0 | ! |
| ! R46 | R(29,31) | 1.0914 | -DE/DX = 0.0 | ! |
| ! R47 | R(32,33) | 1.0881 | -DE/DX = 0.0 | ! |
| ! R48 | R(32,34) | 1.3431 | -DE/DX = 0.0 | ! |
| ! R49 | R(34,35) | 1.0852 | -DE/DX = 0.0 | ! |
| ! R50 | R(36,37) | 1.0911 | -DE/DX = 0.0 | ! |
| ! R51 | R(36,38) | 1.086  | -DE/DX = 0.0 | ! |
| ! R52 | R(36,39) | 1.0896 | -DE/DX = 0.0 | ! |
| ! R53 | R(40,41) | 1.0823 | -DE/DX = 0.0 | ! |
| ! R54 | R(40,59) | 1.4353 | -DE/DX = 0.0 | ! |
| ! R55 | R(42,43) | 1.0923 | -DE/DX = 0.0 | ! |
| ! R56 | R(42,44) | 1.0897 | -DE/DX = 0.0 | ! |
| ! R57 | R(42,45) | 1.0882 | -DE/DX = 0.0 | ! |
| ! R58 | R(46,47) | 1.0858 | -DE/DX = 0.0 | ! |
| ! R59 | R(46,48) | 1.5135 | -DE/DX = 0.0 | ! |
| ! R60 | R(46,61) | 1.4326 | -DE/DX = 0.0 | ! |
| ! R61 | R(48,49) | 1.0934 | -DE/DX = 0.0 | ! |
| ! R62 | R(48,50) | 1.0953 | -DE/DX = 0.0 | ! |
| ! R63 | R(48,51) | 1.5478 | -DE/DX = 0.0 | ! |
| ! R64 | R(51,52) | 1.0918 | -DE/DX = 0.0 | ! |
| ! R65 | R(53,54) | 1.079  | -DE/DX = 0.0 | ! |
| ! R66 | R(53,55) | 1.3567 | -DE/DX = 0.0 | ! |
| ! R67 | R(55,56) | 1.077  | -DE/DX = 0.0 | ! |
| ! R68 | R(57,58) | 1.0764 | -DE/DX = 0.0 | ! |
| ! R69 | R(60,62) | 1.3805 | -DE/DX = 0.0 | ! |
| ! R70 | R(62,63) | 1.4998 | -DE/DX = 0.0 | ! |
| ! R71 | R(62,65) | 1.2059 | -DE/DX = 0.0 | ! |
| ! R72 | R(63,64) | 1.3402 | -DE/DX = 0.0 | ! |
| ! R73 | R(63,71) | 1.5127 | -DE/DX = 0.0 | ! |
| ! R74 | R(64,66) | 1.0859 | -DE/DX = 0.0 | ! |
| ! R75 | R(64,67) | 1.4954 | -DE/DX = 0.0 | ! |
| ! R76 | R(67,68) | 1.0903 | -DE/DX = 0.0 | ! |
| ! R77 | R(67,69) | 1.0961 | -DE/DX = 0.0 | ! |
| ! R78 | R(67,70) | 1.0959 | -DE/DX = 0.0 | ! |
| ! R79 | R(71,72) | 1.0897 | -DE/DX = 0.0 | ! |
| ! R80 | R(71,73) | 1.0954 | -DE/DX = 0.0 | ! |
| ! R81 | R(71,74) | 1.0915 | -DE/DX = 0.0 | ! |

|       |             |          |              |   |
|-------|-------------|----------|--------------|---|
| ! A1  | A(2,1,3)    | 115.3519 | -DE/DX = 0.0 | ! |
| ! A2  | A(2,1,20)   | 104.8861 | -DE/DX = 0.0 | ! |
| ! A3  | A(2,1,22)   | 104.8467 | -DE/DX = 0.0 | ! |
| ! A4  | A(3,1,20)   | 106.0693 | -DE/DX = 0.0 | ! |
| ! A5  | A(3,1,22)   | 109.3407 | -DE/DX = 0.0 | ! |
| ! A6  | A(20,1,22)  | 116.6409 | -DE/DX = 0.0 | ! |
| ! A7  | A(1,2,7)    | 122.589  | -DE/DX = 0.0 | ! |
| ! A8  | A(1,2,34)   | 118.552  | -DE/DX = 0.0 | ! |
| ! A9  | A(7,2,34)   | 118.675  | -DE/DX = 0.0 | ! |
| ! A10 | A(1,3,4)    | 117.5179 | -DE/DX = 0.0 | ! |
| ! A11 | A(1,3,40)   | 120.5229 | -DE/DX = 0.0 | ! |
| ! A12 | A(1,3,59)   | 113.2288 | -DE/DX = 0.0 | ! |
| ! A13 | A(4,3,40)   | 119.6777 | -DE/DX = 0.0 | ! |
| ! A14 | A(4,3,59)   | 110.6687 | -DE/DX = 0.0 | ! |
| ! A15 | A(3,4,5)    | 108.5292 | -DE/DX = 0.0 | ! |
| ! A16 | A(3,4,12)   | 116.6545 | -DE/DX = 0.0 | ! |
| ! A17 | A(3,4,36)   | 107.2145 | -DE/DX = 0.0 | ! |
| ! A18 | A(5,4,12)   | 110.8879 | -DE/DX = 0.0 | ! |
| ! A19 | A(5,4,36)   | 108.2857 | -DE/DX = 0.0 | ! |
| ! A20 | A(12,4,36)  | 104.883  | -DE/DX = 0.0 | ! |
| ! A21 | A(4,5,6)    | 122.2095 | -DE/DX = 0.0 | ! |
| ! A22 | A(4,5,46)   | 126.2488 | -DE/DX = 0.0 | ! |
| ! A23 | A(4,5,61)   | 113.7382 | -DE/DX = 0.0 | ! |
| ! A24 | A(6,5,46)   | 108.2407 | -DE/DX = 0.0 | ! |
| ! A25 | A(6,5,61)   | 109.785  | -DE/DX = 0.0 | ! |
| ! A26 | A(5,6,26)   | 107.1725 | -DE/DX = 0.0 | ! |
| ! A27 | A(5,6,42)   | 114.4807 | -DE/DX = 0.0 | ! |
| ! A28 | A(5,6,51)   | 101.9281 | -DE/DX = 0.0 | ! |
| ! A29 | A(26,6,42)  | 109.1102 | -DE/DX = 0.0 | ! |
| ! A30 | A(26,6,51)  | 113.9931 | -DE/DX = 0.0 | ! |
| ! A31 | A(42,6,51)  | 110.1102 | -DE/DX = 0.0 | ! |
| ! A32 | A(16,8,20)  | 117.522  | -DE/DX = 0.0 | ! |
| ! A33 | A(16,8,29)  | 108.4117 | -DE/DX = 0.0 | ! |
| ! A34 | A(16,8,32)  | 109.5034 | -DE/DX = 0.0 | ! |
| ! A35 | A(20,8,29)  | 96.6032  | -DE/DX = 0.0 | ! |
| ! A36 | A(20,8,32)  | 106.428  | -DE/DX = 0.0 | ! |
| ! A37 | A(29,8,32)  | 118.3155 | -DE/DX = 0.0 | ! |
| ! A38 | A(10,9,11)  | 108.1241 | -DE/DX = 0.0 | ! |
| ! A39 | A(10,9,12)  | 109.219  | -DE/DX = 0.0 | ! |
| ! A40 | A(10,9,20)  | 113.6829 | -DE/DX = 0.0 | ! |
| ! A41 | A(11,9,12)  | 113.2048 | -DE/DX = 0.0 | ! |
| ! A42 | A(11,9,20)  | 103.8285 | -DE/DX = 0.0 | ! |
| ! A43 | A(12,9,20)  | 108.7908 | -DE/DX = 0.0 | ! |
| ! A44 | A(9,11,29)  | 109.8976 | -DE/DX = 0.0 | ! |
| ! A45 | A(4,12,9)   | 110.0123 | -DE/DX = 0.0 | ! |
| ! A46 | A(4,12,13)  | 107.3123 | -DE/DX = 0.0 | ! |
| ! A47 | A(4,12,60)  | 110.9644 | -DE/DX = 0.0 | ! |
| ! A48 | A(9,12,13)  | 110.4492 | -DE/DX = 0.0 | ! |
| ! A49 | A(9,12,60)  | 108.7314 | -DE/DX = 0.0 | ! |
| ! A50 | A(13,12,60) | 109.3677 | -DE/DX = 0.0 | ! |
| ! A51 | A(51,14,53) | 126.1043 | -DE/DX = 0.0 | ! |
| ! A52 | A(51,14,57) | 128.8385 | -DE/DX = 0.0 | ! |

|        |             |          |              |   |
|--------|-------------|----------|--------------|---|
| ! A53  | A(53,14,57) | 105.0493 | -DE/DX = 0.0 | ! |
| ! A54  | A(55,15,57) | 106.7602 | -DE/DX = 0.0 | ! |
| ! A55  | A(8,16,17)  | 109.1935 | -DE/DX = 0.0 | ! |
| ! A56  | A(8,16,18)  | 111.1802 | -DE/DX = 0.0 | ! |
| ! A57  | A(8,16,19)  | 112.5413 | -DE/DX = 0.0 | ! |
| ! A58  | A(17,16,18) | 107.4834 | -DE/DX = 0.0 | ! |
| ! A59  | A(17,16,19) | 107.5463 | -DE/DX = 0.0 | ! |
| ! A60  | A(18,16,19) | 108.7072 | -DE/DX = 0.0 | ! |
| ! A61  | A(1,20,8)   | 120.9097 | -DE/DX = 0.0 | ! |
| ! A62  | A(1,20,9)   | 118.7478 | -DE/DX = 0.0 | ! |
| ! A63  | A(1,20,21)  | 103.9084 | -DE/DX = 0.0 | ! |
| ! A64  | A(8,20,9)   | 104.2023 | -DE/DX = 0.0 | ! |
| ! A65  | A(8,20,21)  | 102.8345 | -DE/DX = 0.0 | ! |
| ! A66  | A(9,20,21)  | 103.8017 | -DE/DX = 0.0 | ! |
| ! A67  | A(1,22,23)  | 111.5061 | -DE/DX = 0.0 | ! |
| ! A68  | A(1,22,24)  | 112.2128 | -DE/DX = 0.0 | ! |
| ! A69  | A(1,22,25)  | 108.5736 | -DE/DX = 0.0 | ! |
| ! A70  | A(23,22,24) | 107.8544 | -DE/DX = 0.0 | ! |
| ! A71  | A(23,22,25) | 107.8603 | -DE/DX = 0.0 | ! |
| ! A72  | A(24,22,25) | 108.7098 | -DE/DX = 0.0 | ! |
| ! A73  | A(6,26,27)  | 110.4015 | -DE/DX = 0.0 | ! |
| ! A74  | A(6,26,28)  | 110.4847 | -DE/DX = 0.0 | ! |
| ! A75  | A(6,26,40)  | 111.4804 | -DE/DX = 0.0 | ! |
| ! A76  | A(27,26,28) | 107.6552 | -DE/DX = 0.0 | ! |
| ! A77  | A(27,26,40) | 109.0851 | -DE/DX = 0.0 | ! |
| ! A78  | A(28,26,40) | 107.6129 | -DE/DX = 0.0 | ! |
| ! A79  | A(8,29,11)  | 104.6594 | -DE/DX = 0.0 | ! |
| ! A80  | A(8,29,30)  | 112.1608 | -DE/DX = 0.0 | ! |
| ! A81  | A(8,29,31)  | 113.6071 | -DE/DX = 0.0 | ! |
| ! A82  | A(11,29,30) | 109.2789 | -DE/DX = 0.0 | ! |
| ! A83  | A(11,29,31) | 107.1977 | -DE/DX = 0.0 | ! |
| ! A84  | A(30,29,31) | 109.6381 | -DE/DX = 0.0 | ! |
| ! A85  | A(8,32,33)  | 119.4842 | -DE/DX = 0.0 | ! |
| ! A86  | A(8,32,34)  | 120.5688 | -DE/DX = 0.0 | ! |
| ! A87  | A(33,32,34) | 119.825  | -DE/DX = 0.0 | ! |
| ! A88  | A(2,34,32)  | 125.5569 | -DE/DX = 0.0 | ! |
| ! A89  | A(2,34,35)  | 113.2158 | -DE/DX = 0.0 | ! |
| ! A90  | A(32,34,35) | 121.0796 | -DE/DX = 0.0 | ! |
| ! A91  | A(4,36,37)  | 110.6514 | -DE/DX = 0.0 | ! |
| ! A92  | A(4,36,38)  | 110.2611 | -DE/DX = 0.0 | ! |
| ! A93  | A(4,36,39)  | 111.4605 | -DE/DX = 0.0 | ! |
| ! A94  | A(37,36,38) | 107.9835 | -DE/DX = 0.0 | ! |
| ! A95  | A(37,36,39) | 107.8359 | -DE/DX = 0.0 | ! |
| ! A96  | A(38,36,39) | 108.5364 | -DE/DX = 0.0 | ! |
| ! A97  | A(3,40,26)  | 124.3752 | -DE/DX = 0.0 | ! |
| ! A98  | A(3,40,41)  | 116.3572 | -DE/DX = 0.0 | ! |
| ! A99  | A(26,40,41) | 115.5633 | -DE/DX = 0.0 | ! |
| ! A100 | A(26,40,59) | 116.0868 | -DE/DX = 0.0 | ! |
| ! A101 | A(41,40,59) | 112.1713 | -DE/DX = 0.0 | ! |
| ! A102 | A(6,42,43)  | 108.655  | -DE/DX = 0.0 | ! |
| ! A103 | A(6,42,44)  | 112.5453 | -DE/DX = 0.0 | ! |
| ! A104 | A(6,42,45)  | 112.3985 | -DE/DX = 0.0 | ! |

|                    |          |              |   |
|--------------------|----------|--------------|---|
| ! A105 A(43,42,44) | 107.8542 | -DE/DX = 0.0 | ! |
| ! A106 A(43,42,45) | 108.1767 | -DE/DX = 0.0 | ! |
| ! A107 A(44,42,45) | 107.0318 | -DE/DX = 0.0 | ! |
| ! A108 A(5,46,47)  | 123.3677 | -DE/DX = 0.0 | ! |
| ! A109 A(5,46,48)  | 109.8202 | -DE/DX = 0.0 | ! |
| ! A110 A(47,46,48) | 121.1683 | -DE/DX = 0.0 | ! |
| ! A111 A(47,46,61) | 115.1313 | -DE/DX = 0.0 | ! |
| ! A112 A(48,46,61) | 111.7313 | -DE/DX = 0.0 | ! |
| ! A113 A(46,48,49) | 112.6208 | -DE/DX = 0.0 | ! |
| ! A114 A(46,48,50) | 109.5706 | -DE/DX = 0.0 | ! |
| ! A115 A(46,48,51) | 102.857  | -DE/DX = 0.0 | ! |
| ! A116 A(49,48,50) | 107.8033 | -DE/DX = 0.0 | ! |
| ! A117 A(49,48,51) | 111.8888 | -DE/DX = 0.0 | ! |
| ! A118 A(50,48,51) | 112.1114 | -DE/DX = 0.0 | ! |
| ! A119 A(6,51,14)  | 116.6829 | -DE/DX = 0.0 | ! |
| ! A120 A(6,51,48)  | 104.2867 | -DE/DX = 0.0 | ! |
| ! A121 A(6,51,52)  | 106.1393 | -DE/DX = 0.0 | ! |
| ! A122 A(14,51,48) | 115.2826 | -DE/DX = 0.0 | ! |
| ! A123 A(14,51,52) | 107.1892 | -DE/DX = 0.0 | ! |
| ! A124 A(48,51,52) | 106.51   | -DE/DX = 0.0 | ! |
| ! A125 A(14,53,54) | 126.9823 | -DE/DX = 0.0 | ! |
| ! A126 A(14,53,55) | 106.7966 | -DE/DX = 0.0 | ! |
| ! A127 A(54,53,55) | 126.2177 | -DE/DX = 0.0 | ! |
| ! A128 A(15,55,53) | 110.3339 | -DE/DX = 0.0 | ! |
| ! A129 A(15,55,56) | 116.0077 | -DE/DX = 0.0 | ! |
| ! A130 A(53,55,56) | 133.6564 | -DE/DX = 0.0 | ! |
| ! A131 A(14,57,15) | 111.0591 | -DE/DX = 0.0 | ! |
| ! A132 A(14,57,58) | 133.6057 | -DE/DX = 0.0 | ! |
| ! A133 A(15,57,58) | 115.3348 | -DE/DX = 0.0 | ! |
| ! A134 A(12,60,62) | 122.452  | -DE/DX = 0.0 | ! |
| ! A135 A(60,62,63) | 118.6681 | -DE/DX = 0.0 | ! |
| ! A136 A(60,62,65) | 117.5454 | -DE/DX = 0.0 | ! |
| ! A137 A(63,62,65) | 123.472  | -DE/DX = 0.0 | ! |
| ! A138 A(62,63,64) | 116.2922 | -DE/DX = 0.0 | ! |
| ! A139 A(62,63,71) | 119.4971 | -DE/DX = 0.0 | ! |
| ! A140 A(64,63,71) | 124.1105 | -DE/DX = 0.0 | ! |
| ! A141 A(63,64,66) | 116.9604 | -DE/DX = 0.0 | ! |
| ! A142 A(63,64,67) | 127.2301 | -DE/DX = 0.0 | ! |
| ! A143 A(66,64,67) | 115.8042 | -DE/DX = 0.0 | ! |
| ! A144 A(64,67,68) | 113.4828 | -DE/DX = 0.0 | ! |
| ! A145 A(64,67,69) | 110.1791 | -DE/DX = 0.0 | ! |
| ! A146 A(64,67,70) | 110.3058 | -DE/DX = 0.0 | ! |
| ! A147 A(68,67,69) | 107.9366 | -DE/DX = 0.0 | ! |
| ! A148 A(68,67,70) | 108.3499 | -DE/DX = 0.0 | ! |
| ! A149 A(69,67,70) | 106.3016 | -DE/DX = 0.0 | ! |
| ! A150 A(63,71,72) | 110.9819 | -DE/DX = 0.0 | ! |
| ! A151 A(63,71,73) | 112.869  | -DE/DX = 0.0 | ! |
| ! A152 A(63,71,74) | 110.5308 | -DE/DX = 0.0 | ! |
| ! A153 A(72,71,73) | 107.7057 | -DE/DX = 0.0 | ! |
| ! A154 A(72,71,74) | 107.4152 | -DE/DX = 0.0 | ! |
| ! A155 A(73,71,74) | 107.0977 | -DE/DX = 0.0 | ! |
| ! D1 D(3,1,2,7)    | -51.4632 | -DE/DX = 0.0 | ! |



|       |               |           |              |   |
|-------|---------------|-----------|--------------|---|
| ! D2  | D(3,1,2,34)   | 133.5355  | -DE/DX = 0.0 | ! |
| ! D3  | D(20,1,2,7)   | -167.7511 | -DE/DX = 0.0 | ! |
| ! D4  | D(20,1,2,34)  | 17.2477   | -DE/DX = 0.0 | ! |
| ! D5  | D(22,1,2,7)   | 68.8505   | -DE/DX = 0.0 | ! |
| ! D6  | D(22,1,2,34)  | -106.1507 | -DE/DX = 0.0 | ! |
| ! D7  | D(2,1,3,4)    | -152.0105 | -DE/DX = 0.0 | ! |
| ! D8  | D(2,1,3,40)   | 10.7826   | -DE/DX = 0.0 | ! |
| ! D9  | D(2,1,3,59)   | 76.9413   | -DE/DX = 0.0 | ! |
| ! D10 | D(20,1,3,4)   | -36.3958  | -DE/DX = 0.0 | ! |
| ! D11 | D(20,1,3,40)  | 126.3972  | -DE/DX = 0.0 | ! |
| ! D12 | D(20,1,3,59)  | -167.444  | -DE/DX = 0.0 | ! |
| ! D13 | D(22,1,3,4)   | 90.1627   | -DE/DX = 0.0 | ! |
| ! D14 | D(22,1,3,40)  | -107.0443 | -DE/DX = 0.0 | ! |
| ! D15 | D(22,1,3,59)  | -40.8855  | -DE/DX = 0.0 | ! |
| ! D16 | D(2,1,20,8)   | -51.1391  | -DE/DX = 0.0 | ! |
| ! D17 | D(2,1,20,9)   | 177.9718  | -DE/DX = 0.0 | ! |
| ! D18 | D(2,1,20,21)  | 63.3794   | -DE/DX = 0.0 | ! |
| ! D19 | D(3,1,20,8)   | -173.6616 | -DE/DX = 0.0 | ! |
| ! D20 | D(3,1,20,9)   | 55.4493   | -DE/DX = 0.0 | ! |
| ! D21 | D(3,1,20,21)  | -59.1431  | -DE/DX = 0.0 | ! |
| ! D22 | D(22,1,20,8)  | 64.3268   | -DE/DX = 0.0 | ! |
| ! D23 | D(22,1,20,9)  | -66.5623  | -DE/DX = 0.0 | ! |
| ! D24 | D(22,1,20,21) | 178.8453  | -DE/DX = 0.0 | ! |
| ! D25 | D(2,1,22,23)  | 42.1086   | -DE/DX = 0.0 | ! |
| ! D26 | D(2,1,22,24)  | 163.2307  | -DE/DX = 0.0 | ! |
| ! D27 | D(2,1,22,25)  | -76.5876  | -DE/DX = 0.0 | ! |
| ! D28 | D(3,1,22,23)  | 166.3375  | -DE/DX = 0.0 | ! |
| ! D29 | D(3,1,22,24)  | -72.5404  | -DE/DX = 0.0 | ! |
| ! D30 | D(3,1,22,25)  | 47.6413   | -DE/DX = 0.0 | ! |
| ! D31 | D(20,1,22,23) | -73.3793  | -DE/DX = 0.0 | ! |
| ! D32 | D(20,1,22,24) | 47.7429   | -DE/DX = 0.0 | ! |
| ! D33 | D(20,1,22,25) | 167.9246  | -DE/DX = 0.0 | ! |
| ! D34 | D(1,2,34,32)  | 6.5901    | -DE/DX = 0.0 | ! |
| ! D35 | D(1,2,34,35)  | -177.8138 | -DE/DX = 0.0 | ! |
| ! D36 | D(7,2,34,32)  | -168.6099 | -DE/DX = 0.0 | ! |
| ! D37 | D(7,2,34,35)  | 6.9862    | -DE/DX = 0.0 | ! |
| ! D38 | D(1,3,4,5)    | 160.1013  | -DE/DX = 0.0 | ! |
| ! D39 | D(1,3,4,12)   | 34.0165   | -DE/DX = 0.0 | ! |
| ! D40 | D(1,3,4,36)   | -83.1376  | -DE/DX = 0.0 | ! |
| ! D41 | D(40,3,4,5)   | -2.8428   | -DE/DX = 0.0 | ! |
| ! D42 | D(40,3,4,12)  | -128.9276 | -DE/DX = 0.0 | ! |
| ! D43 | D(40,3,4,36)  | 113.9183  | -DE/DX = 0.0 | ! |
| ! D44 | D(59,3,4,5)   | -67.6895  | -DE/DX = 0.0 | ! |
| ! D45 | D(59,3,4,12)  | 166.2257  | -DE/DX = 0.0 | ! |
| ! D46 | D(59,3,4,36)  | 49.0716   | -DE/DX = 0.0 | ! |
| ! D47 | D(1,3,40,26)  | -158.0127 | -DE/DX = 0.0 | ! |
| ! D48 | D(1,3,40,41)  | -0.7315   | -DE/DX = 0.0 | ! |
| ! D49 | D(4,3,40,26)  | 4.4115    | -DE/DX = 0.0 | ! |
| ! D50 | D(4,3,40,41)  | 161.6927  | -DE/DX = 0.0 | ! |
| ! D51 | D(3,4,5,6)    | -30.325   | -DE/DX = 0.0 | ! |
| ! D52 | D(3,4,5,46)   | 172.6592  | -DE/DX = 0.0 | ! |
| ! D53 | D(3,4,5,61)   | 105.242   | -DE/DX = 0.0 | ! |

|        |               |           |              |   |
|--------|---------------|-----------|--------------|---|
| ! D54  | D(12,4,5,6)   | 99.0448   | -DE/DX = 0.0 | ! |
| ! D55  | D(12,4,5,46)  | -57.971   | -DE/DX = 0.0 | ! |
| ! D56  | D(12,4,5,61)  | -125.3883 | -DE/DX = 0.0 | ! |
| ! D57  | D(36,4,5,6)   | -146.3957 | -DE/DX = 0.0 | ! |
| ! D58  | D(36,4,5,46)  | 56.5885   | -DE/DX = 0.0 | ! |
| ! D59  | D(36,4,5,61)  | -10.8288  | -DE/DX = 0.0 | ! |
| ! D60  | D(3,4,12,9)   | -41.522   | -DE/DX = 0.0 | ! |
| ! D61  | D(3,4,12,13)  | -161.7206 | -DE/DX = 0.0 | ! |
| ! D62  | D(3,4,12,60)  | 78.8455   | -DE/DX = 0.0 | ! |
| ! D63  | D(5,4,12,9)   | -166.4218 | -DE/DX = 0.0 | ! |
| ! D64  | D(5,4,12,13)  | 73.3796   | -DE/DX = 0.0 | ! |
| ! D65  | D(5,4,12,60)  | -46.0543  | -DE/DX = 0.0 | ! |
| ! D66  | D(36,4,12,9)  | 76.9048   | -DE/DX = 0.0 | ! |
| ! D67  | D(36,4,12,13) | -43.2938  | -DE/DX = 0.0 | ! |
| ! D68  | D(36,4,12,60) | -162.7277 | -DE/DX = 0.0 | ! |
| ! D69  | D(3,4,36,37)  | -172.2578 | -DE/DX = 0.0 | ! |
| ! D70  | D(3,4,36,38)  | -52.8623  | -DE/DX = 0.0 | ! |
| ! D71  | D(3,4,36,39)  | 67.7506   | -DE/DX = 0.0 | ! |
| ! D72  | D(5,4,36,37)  | -55.3366  | -DE/DX = 0.0 | ! |
| ! D73  | D(5,4,36,38)  | 64.0589   | -DE/DX = 0.0 | ! |
| ! D74  | D(5,4,36,39)  | -175.3282 | -DE/DX = 0.0 | ! |
| ! D75  | D(12,4,36,37) | 63.1111   | -DE/DX = 0.0 | ! |
| ! D76  | D(12,4,36,38) | -177.4935 | -DE/DX = 0.0 | ! |
| ! D77  | D(12,4,36,39) | -56.8806  | -DE/DX = 0.0 | ! |
| ! D78  | D(4,5,6,26)   | 59.6292   | -DE/DX = 0.0 | ! |
| ! D79  | D(4,5,6,42)   | -61.5164  | -DE/DX = 0.0 | ! |
| ! D80  | D(4,5,6,51)   | 179.6472  | -DE/DX = 0.0 | ! |
| ! D81  | D(46,5,6,26)  | -139.7346 | -DE/DX = 0.0 | ! |
| ! D82  | D(46,5,6,42)  | 99.1198   | -DE/DX = 0.0 | ! |
| ! D83  | D(46,5,6,51)  | -19.7165  | -DE/DX = 0.0 | ! |
| ! D84  | D(61,5,6,26)  | -77.4453  | -DE/DX = 0.0 | ! |
| ! D85  | D(61,5,6,42)  | 161.4092  | -DE/DX = 0.0 | ! |
| ! D86  | D(61,5,6,51)  | 42.5728   | -DE/DX = 0.0 | ! |
| ! D87  | D(4,5,46,47)  | 4.1793    | -DE/DX = 0.0 | ! |
| ! D88  | D(4,5,46,48)  | 157.8284  | -DE/DX = 0.0 | ! |
| ! D89  | D(6,5,46,47)  | -155.4639 | -DE/DX = 0.0 | ! |
| ! D90  | D(6,5,46,48)  | -1.8148   | -DE/DX = 0.0 | ! |
| ! D91  | D(5,6,26,27)  | -173.022  | -DE/DX = 0.0 | ! |
| ! D92  | D(5,6,26,28)  | 68.0065   | -DE/DX = 0.0 | ! |
| ! D93  | D(5,6,26,40)  | -51.6058  | -DE/DX = 0.0 | ! |
| ! D94  | D(42,6,26,27) | -48.5441  | -DE/DX = 0.0 | ! |
| ! D95  | D(42,6,26,28) | -167.5155 | -DE/DX = 0.0 | ! |
| ! D96  | D(42,6,26,40) | 72.8722   | -DE/DX = 0.0 | ! |
| ! D97  | D(51,6,26,27) | 74.9951   | -DE/DX = 0.0 | ! |
| ! D98  | D(51,6,26,28) | -43.9764  | -DE/DX = 0.0 | ! |
| ! D99  | D(51,6,26,40) | -163.5887 | -DE/DX = 0.0 | ! |
| ! D100 | D(5,6,42,43)  | -178.7818 | -DE/DX = 0.0 | ! |
| ! D101 | D(5,6,42,44)  | -59.4065  | -DE/DX = 0.0 | ! |
| ! D102 | D(5,6,42,45)  | 61.5317   | -DE/DX = 0.0 | ! |
| ! D103 | D(26,6,42,43) | 61.1459   | -DE/DX = 0.0 | ! |
| ! D104 | D(26,6,42,44) | -179.4789 | -DE/DX = 0.0 | ! |
| ! D105 | D(26,6,42,45) | -58.5407  | -DE/DX = 0.0 | ! |

|                      |           |              |   |
|----------------------|-----------|--------------|---|
| ! D106 D(51,6,42,43) | -64.6674  | -DE/DX = 0.0 | ! |
| ! D107 D(51,6,42,44) | 54.7078   | -DE/DX = 0.0 | ! |
| ! D108 D(51,6,42,45) | 175.646   | -DE/DX = 0.0 | ! |
| ! D109 D(5,6,51,14)  | 161.948   | -DE/DX = 0.0 | ! |
| ! D110 D(5,6,51,48)  | 33.5426   | -DE/DX = 0.0 | ! |
| ! D111 D(5,6,51,52)  | -78.7275  | -DE/DX = 0.0 | ! |
| ! D112 D(26,6,51,14) | -82.944   | -DE/DX = 0.0 | ! |
| ! D113 D(26,6,51,48) | 148.6506  | -DE/DX = 0.0 | ! |
| ! D114 D(26,6,51,52) | 36.3805   | -DE/DX = 0.0 | ! |
| ! D115 D(42,6,51,14) | 40.0521   | -DE/DX = 0.0 | ! |
| ! D116 D(42,6,51,48) | -88.3533  | -DE/DX = 0.0 | ! |
| ! D117 D(42,6,51,52) | 159.3766  | -DE/DX = 0.0 | ! |
| ! D118 D(20,8,16,17) | -173.7189 | -DE/DX = 0.0 | ! |
| ! D119 D(20,8,16,18) | -55.2917  | -DE/DX = 0.0 | ! |
| ! D120 D(20,8,16,19) | 66.9332   | -DE/DX = 0.0 | ! |
| ! D121 D(29,8,16,17) | -65.6529  | -DE/DX = 0.0 | ! |
| ! D122 D(29,8,16,18) | 52.7743   | -DE/DX = 0.0 | ! |
| ! D123 D(29,8,16,19) | 174.9992  | -DE/DX = 0.0 | ! |
| ! D124 D(32,8,16,17) | 64.7569   | -DE/DX = 0.0 | ! |
| ! D125 D(32,8,16,18) | -176.816  | -DE/DX = 0.0 | ! |
| ! D126 D(32,8,16,19) | -54.591   | -DE/DX = 0.0 | ! |
| ! D127 D(16,8,20,1)  | -66.2056  | -DE/DX = 0.0 | ! |
| ! D128 D(16,8,20,9)  | 70.6612   | -DE/DX = 0.0 | ! |
| ! D129 D(16,8,20,21) | 178.7234  | -DE/DX = 0.0 | ! |
| ! D130 D(29,8,20,1)  | 179.0329  | -DE/DX = 0.0 | ! |
| ! D131 D(29,8,20,9)  | -44.1003  | -DE/DX = 0.0 | ! |
| ! D132 D(29,8,20,21) | 63.9619   | -DE/DX = 0.0 | ! |
| ! D133 D(32,8,20,1)  | 56.8957   | -DE/DX = 0.0 | ! |
| ! D134 D(32,8,20,9)  | -166.2375 | -DE/DX = 0.0 | ! |
| ! D135 D(32,8,20,21) | -58.1754  | -DE/DX = 0.0 | ! |
| ! D136 D(16,8,29,11) | -82.4537  | -DE/DX = 0.0 | ! |
| ! D137 D(16,8,29,30) | 159.1842  | -DE/DX = 0.0 | ! |
| ! D138 D(16,8,29,31) | 34.1525   | -DE/DX = 0.0 | ! |
| ! D139 D(20,8,29,11) | 39.4711   | -DE/DX = 0.0 | ! |
| ! D140 D(20,8,29,30) | -78.891   | -DE/DX = 0.0 | ! |
| ! D141 D(20,8,29,31) | 156.0772  | -DE/DX = 0.0 | ! |
| ! D142 D(32,8,29,11) | 152.1623  | -DE/DX = 0.0 | ! |
| ! D143 D(32,8,29,30) | 33.8002   | -DE/DX = 0.0 | ! |
| ! D144 D(32,8,29,31) | -91.2316  | -DE/DX = 0.0 | ! |
| ! D145 D(16,8,32,33) | -74.4097  | -DE/DX = 0.0 | ! |
| ! D146 D(16,8,32,34) | 101.5671  | -DE/DX = 0.0 | ! |
| ! D147 D(20,8,32,33) | 157.6012  | -DE/DX = 0.0 | ! |
| ! D148 D(20,8,32,34) | -26.4219  | -DE/DX = 0.0 | ! |
| ! D149 D(29,8,32,33) | 50.4411   | -DE/DX = 0.0 | ! |
| ! D150 D(29,8,32,34) | -133.5821 | -DE/DX = 0.0 | ! |
| ! D151 D(10,9,11,29) | 113.8911  | -DE/DX = 0.0 | ! |
| ! D152 D(12,9,11,29) | -124.9661 | -DE/DX = 0.0 | ! |
| ! D153 D(20,9,11,29) | -7.1618   | -DE/DX = 0.0 | ! |
| ! D154 D(10,9,12,4)  | -70.1426  | -DE/DX = 0.0 | ! |
| ! D155 D(10,9,12,13) | 48.1393   | -DE/DX = 0.0 | ! |
| ! D156 D(10,9,12,60) | 168.1503  | -DE/DX = 0.0 | ! |
| ! D157 D(11,9,12,4)  | 169.3346  | -DE/DX = 0.0 | ! |

|                       |           |              |   |
|-----------------------|-----------|--------------|---|
| ! D158 D(11,9,12,13)  | -72.3836  | -DE/DX = 0.0 | ! |
| ! D159 D(11,9,12,60)  | 47.6274   | -DE/DX = 0.0 | ! |
| ! D160 D(20,9,12,4)   | 54.4646   | -DE/DX = 0.0 | ! |
| ! D161 D(20,9,12,13)  | 172.7464  | -DE/DX = 0.0 | ! |
| ! D162 D(20,9,12,60)  | -67.2426  | -DE/DX = 0.0 | ! |
| ! D163 D(10,9,20,1)   | 54.1742   | -DE/DX = 0.0 | ! |
| ! D164 D(10,9,20,8)   | -83.8311  | -DE/DX = 0.0 | ! |
| ! D165 D(10,9,20,21)  | 168.824   | -DE/DX = 0.0 | ! |
| ! D166 D(11,9,20,1)   | 171.4187  | -DE/DX = 0.0 | ! |
| ! D167 D(11,9,20,8)   | 33.4134   | -DE/DX = 0.0 | ! |
| ! D168 D(11,9,20,21)  | -73.9315  | -DE/DX = 0.0 | ! |
| ! D169 D(12,9,20,1)   | -67.7589  | -DE/DX = 0.0 | ! |
| ! D170 D(12,9,20,8)   | 154.2358  | -DE/DX = 0.0 | ! |
| ! D171 D(12,9,20,21)  | 46.891    | -DE/DX = 0.0 | ! |
| ! D172 D(9,11,29,8)   | -21.4745  | -DE/DX = 0.0 | ! |
| ! D173 D(9,11,29,30)  | 98.8278   | -DE/DX = 0.0 | ! |
| ! D174 D(9,11,29,31)  | -142.4234 | -DE/DX = 0.0 | ! |
| ! D175 D(4,12,60,62)  | 171.0431  | -DE/DX = 0.0 | ! |
| ! D176 D(9,12,60,62)  | -67.8322  | -DE/DX = 0.0 | ! |
| ! D177 D(13,12,60,62) | 52.8479   | -DE/DX = 0.0 | ! |
| ! D178 D(53,14,51,6)  | 76.8263   | -DE/DX = 0.0 | ! |
| ! D179 D(53,14,51,48) | -160.2976 | -DE/DX = 0.0 | ! |
| ! D180 D(53,14,51,52) | -41.9322  | -DE/DX = 0.0 | ! |
| ! D181 D(57,14,51,6)  | -104.3544 | -DE/DX = 0.0 | ! |
| ! D182 D(57,14,51,48) | 18.5217   | -DE/DX = 0.0 | ! |
| ! D183 D(57,14,51,52) | 136.8872  | -DE/DX = 0.0 | ! |
| ! D184 D(51,14,53,54) | -0.023    | -DE/DX = 0.0 | ! |
| ! D185 D(51,14,53,55) | 179.3422  | -DE/DX = 0.0 | ! |
| ! D186 D(57,14,53,54) | -179.0707 | -DE/DX = 0.0 | ! |
| ! D187 D(57,14,53,55) | 0.2945    | -DE/DX = 0.0 | ! |
| ! D188 D(51,14,57,15) | -179.2521 | -DE/DX = 0.0 | ! |
| ! D189 D(51,14,57,58) | 0.5073    | -DE/DX = 0.0 | ! |
| ! D190 D(53,14,57,15) | -0.2399   | -DE/DX = 0.0 | ! |
| ! D191 D(53,14,57,58) | 179.5195  | -DE/DX = 0.0 | ! |
| ! D192 D(57,15,55,53) | 0.1047    | -DE/DX = 0.0 | ! |
| ! D193 D(57,15,55,56) | 179.6613  | -DE/DX = 0.0 | ! |
| ! D194 D(55,15,57,14) | 0.0948    | -DE/DX = 0.0 | ! |
| ! D195 D(55,15,57,58) | -179.7125 | -DE/DX = 0.0 | ! |
| ! D196 D(6,26,40,3)   | 25.0846   | -DE/DX = 0.0 | ! |
| ! D197 D(6,26,40,41)  | -132.3578 | -DE/DX = 0.0 | ! |
| ! D198 D(6,26,40,59)  | 93.2174   | -DE/DX = 0.0 | ! |
| ! D199 D(27,26,40,3)  | 147.2629  | -DE/DX = 0.0 | ! |
| ! D200 D(27,26,40,41) | -10.1794  | -DE/DX = 0.0 | ! |
| ! D201 D(27,26,40,59) | -144.6043 | -DE/DX = 0.0 | ! |
| ! D202 D(28,26,40,3)  | -96.2143  | -DE/DX = 0.0 | ! |
| ! D203 D(28,26,40,41) | 106.3433  | -DE/DX = 0.0 | ! |
| ! D204 D(28,26,40,59) | -28.0816  | -DE/DX = 0.0 | ! |
| ! D205 D(8,32,34,2)   | -1.2789   | -DE/DX = 0.0 | ! |
| ! D206 D(8,32,34,35)  | -176.5525 | -DE/DX = 0.0 | ! |
| ! D207 D(33,32,34,2)  | 174.6843  | -DE/DX = 0.0 | ! |
| ! D208 D(33,32,34,35) | -0.5893   | -DE/DX = 0.0 | ! |
| ! D209 D(5,46,48,49)  | 143.7376  | -DE/DX = 0.0 | ! |

|        |                |           |              |   |
|--------|----------------|-----------|--------------|---|
| ! D210 | D(5,46,48,50)  | -96.284   | -DE/DX = 0.0 | ! |
| ! D211 | D(5,46,48,51)  | 23.1159   | -DE/DX = 0.0 | ! |
| ! D212 | D(47,46,48,49) | -61.9356  | -DE/DX = 0.0 | ! |
| ! D213 | D(47,46,48,50) | 58.0428   | -DE/DX = 0.0 | ! |
| ! D214 | D(47,46,48,51) | 177.4427  | -DE/DX = 0.0 | ! |
| ! D215 | D(61,46,48,49) | 78.9059   | -DE/DX = 0.0 | ! |
| ! D216 | D(61,46,48,50) | -161.1157 | -DE/DX = 0.0 | ! |
| ! D217 | D(61,46,48,51) | -41.7158  | -DE/DX = 0.0 | ! |
| ! D218 | D(46,48,51,6)  | -34.8421  | -DE/DX = 0.0 | ! |
| ! D219 | D(46,48,51,14) | -164.0955 | -DE/DX = 0.0 | ! |
| ! D220 | D(46,48,51,52) | 77.1611   | -DE/DX = 0.0 | ! |
| ! D221 | D(49,48,51,6)  | -155.9649 | -DE/DX = 0.0 | ! |
| ! D222 | D(49,48,51,14) | 74.7818   | -DE/DX = 0.0 | ! |
| ! D223 | D(49,48,51,52) | -43.9616  | -DE/DX = 0.0 | ! |
| ! D224 | D(50,48,51,6)  | 82.7768   | -DE/DX = 0.0 | ! |
| ! D225 | D(50,48,51,14) | -46.4765  | -DE/DX = 0.0 | ! |
| ! D226 | D(50,48,51,52) | -165.22   | -DE/DX = 0.0 | ! |
| ! D227 | D(14,53,55,15) | -0.2497   | -DE/DX = 0.0 | ! |
| ! D228 | D(14,53,55,56) | -179.6989 | -DE/DX = 0.0 | ! |
| ! D229 | D(54,53,55,15) | 179.1218  | -DE/DX = 0.0 | ! |
| ! D230 | D(54,53,55,56) | -0.3275   | -DE/DX = 0.0 | ! |
| ! D231 | D(12,60,62,63) | -49.0612  | -DE/DX = 0.0 | ! |
| ! D232 | D(12,60,62,65) | 137.1517  | -DE/DX = 0.0 | ! |
| ! D233 | D(60,62,63,64) | 148.3287  | -DE/DX = 0.0 | ! |
| ! D234 | D(60,62,63,71) | -35.1627  | -DE/DX = 0.0 | ! |
| ! D235 | D(65,62,63,64) | -38.2768  | -DE/DX = 0.0 | ! |
| ! D236 | D(65,62,63,71) | 138.2318  | -DE/DX = 0.0 | ! |
| ! D237 | D(62,63,64,66) | -1.6992   | -DE/DX = 0.0 | ! |
| ! D238 | D(62,63,64,67) | 179.1798  | -DE/DX = 0.0 | ! |
| ! D239 | D(71,63,64,66) | -178.0287 | -DE/DX = 0.0 | ! |
| ! D240 | D(71,63,64,67) | 2.8503    | -DE/DX = 0.0 | ! |
| ! D241 | D(62,63,71,72) | -20.0731  | -DE/DX = 0.0 | ! |
| ! D242 | D(62,63,71,73) | 100.9422  | -DE/DX = 0.0 | ! |
| ! D243 | D(62,63,71,74) | -139.1452 | -DE/DX = 0.0 | ! |
| ! D244 | D(64,63,71,72) | 156.1459  | -DE/DX = 0.0 | ! |
| ! D245 | D(64,63,71,73) | -82.8389  | -DE/DX = 0.0 | ! |
| ! D246 | D(64,63,71,74) | 37.0738   | -DE/DX = 0.0 | ! |
| ! D247 | D(63,64,67,68) | -2.4028   | -DE/DX = 0.0 | ! |
| ! D248 | D(63,64,67,69) | 118.7552  | -DE/DX = 0.0 | ! |
| ! D249 | D(63,64,67,70) | -124.1891 | -DE/DX = 0.0 | ! |
| ! D250 | D(66,64,67,68) | 178.4674  | -DE/DX = 0.0 | ! |
| ! D251 | D(66,64,67,69) | -60.3746  | -DE/DX = 0.0 | ! |
| ! D252 | D(66,64,67,70) | 56.6811   | -DE/DX = 0.0 | ! |

**4. opt=tight b3lyp/6-311++g(d,p) scrf=(cpcm,solvent=chloroform,read)  
nosymm**

-----  
! Optimized Parameters !  
! (Angstroms and Degrees) !  
-----

| ! Name | Definition | Value  | Derivative Info. | ! |
|--------|------------|--------|------------------|---|
| <hr/>  |            |        |                  |   |
| ! R1   | R(1,2)     | 1.5583 | -DE/DX = 0.0     | ! |
| ! R2   | R(1,3)     | 1.5777 | -DE/DX = 0.0     | ! |
| ! R3   | R(1,20)    | 1.5215 | -DE/DX = 0.0     | ! |
| ! R4   | R(1,22)    | 1.5509 | -DE/DX = 0.0     | ! |
| ! R5   | R(2,7)     | 1.2213 | -DE/DX = 0.0     | ! |
| ! R6   | R(2,34)    | 1.491  | -DE/DX = 0.0     | ! |
| ! R7   | R(3,4)     | 1.5968 | -DE/DX = 0.0     | ! |
| ! R8   | R(3,40)    | 1.4958 | -DE/DX = 0.0     | ! |
| ! R9   | R(3,59)    | 1.4335 | -DE/DX = 0.0     | ! |
| ! R10  | R(4,5)     | 1.5548 | -DE/DX = 0.0     | ! |
| ! R11  | R(4,12)    | 1.5787 | -DE/DX = 0.0     | ! |
| ! R12  | R(4,36)    | 1.5543 | -DE/DX = 0.0     | ! |
| ! R13  | R(5,6)     | 1.5487 | -DE/DX = 0.0     | ! |
| ! R14  | R(5,46)    | 1.4717 | -DE/DX = 0.0     | ! |
| ! R15  | R(5,61)    | 1.459  | -DE/DX = 0.0     | ! |
| ! R16  | R(6,26)    | 1.5307 | -DE/DX = 0.0     | ! |
| ! R17  | R(6,42)    | 1.5373 | -DE/DX = 0.0     | ! |
| ! R18  | R(6,51)    | 1.5814 | -DE/DX = 0.0     | ! |
| ! R19  | R(8,16)    | 1.5481 | -DE/DX = 0.0     | ! |
| ! R20  | R(8,20)    | 1.5335 | -DE/DX = 0.0     | ! |
| ! R21  | R(8,29)    | 1.5468 | -DE/DX = 0.0     | ! |
| ! R22  | R(8,32)    | 1.501  | -DE/DX = 0.0     | ! |
| ! R23  | R(9,10)    | 1.0929 | -DE/DX = 0.0     | ! |
| ! R24  | R(9,11)    | 1.4411 | -DE/DX = 0.0     | ! |
| ! R25  | R(9,12)    | 1.5373 | -DE/DX = 0.0     | ! |
| ! R26  | R(9,20)    | 1.5042 | -DE/DX = 0.0     | ! |
| ! R27  | R(11,29)   | 1.4551 | -DE/DX = 0.0     | ! |
| ! R28  | R(12,13)   | 1.0897 | -DE/DX = 0.0     | ! |
| ! R29  | R(12,60)   | 1.4369 | -DE/DX = 0.0     | ! |
| ! R30  | R(14,51)   | 1.501  | -DE/DX = 0.0     | ! |
| ! R31  | R(14,53)   | 1.4438 | -DE/DX = 0.0     | ! |
| ! R32  | R(14,57)   | 1.3619 | -DE/DX = 0.0     | ! |
| ! R33  | R(15,55)   | 1.3638 | -DE/DX = 0.0     | ! |
| ! R34  | R(15,57)   | 1.3686 | -DE/DX = 0.0     | ! |
| ! R35  | R(16,17)   | 1.0935 | -DE/DX = 0.0     | ! |
| ! R36  | R(16,18)   | 1.0924 | -DE/DX = 0.0     | ! |
| ! R37  | R(16,19)   | 1.0884 | -DE/DX = 0.0     | ! |
| ! R38  | R(20,21)   | 1.0982 | -DE/DX = 0.0     | ! |
| ! R39  | R(22,23)   | 1.09   | -DE/DX = 0.0     | ! |
| ! R40  | R(22,24)   | 1.0897 | -DE/DX = 0.0     | ! |
| ! R41  | R(22,25)   | 1.0896 | -DE/DX = 0.0     | ! |
| ! R42  | R(26,27)   | 1.0932 | -DE/DX = 0.0     | ! |
| ! R43  | R(26,28)   | 1.0943 | -DE/DX = 0.0     | ! |
| ! R44  | R(26,40)   | 1.5181 | -DE/DX = 0.0     | ! |
| ! R45  | R(29,30)   | 1.0949 | -DE/DX = 0.0     | ! |
| ! R46  | R(29,31)   | 1.0905 | -DE/DX = 0.0     | ! |
| ! R47  | R(32,33)   | 1.0874 | -DE/DX = 0.0     | ! |
| ! R48  | R(32,34)   | 1.3445 | -DE/DX = 0.0     | ! |
| ! R49  | R(34,35)   | 1.0852 | -DE/DX = 0.0     | ! |
| ! R50  | R(36,37)   | 1.0905 | -DE/DX = 0.0     | ! |

|       |            |          |              |   |
|-------|------------|----------|--------------|---|
| ! R51 | R(36,38)   | 1.0862   | -DE/DX = 0.0 | ! |
| ! R52 | R(36,39)   | 1.0892   | -DE/DX = 0.0 | ! |
| ! R53 | R(40,41)   | 1.0822   | -DE/DX = 0.0 | ! |
| ! R54 | R(40,59)   | 1.4395   | -DE/DX = 0.0 | ! |
| ! R55 | R(42,43)   | 1.0924   | -DE/DX = 0.0 | ! |
| ! R56 | R(42,44)   | 1.0895   | -DE/DX = 0.0 | ! |
| ! R57 | R(42,45)   | 1.0885   | -DE/DX = 0.0 | ! |
| ! R58 | R(46,47)   | 1.0847   | -DE/DX = 0.0 | ! |
| ! R59 | R(46,48)   | 1.5123   | -DE/DX = 0.0 | ! |
| ! R60 | R(46,61)   | 1.4376   | -DE/DX = 0.0 | ! |
| ! R61 | R(48,49)   | 1.0932   | -DE/DX = 0.0 | ! |
| ! R62 | R(48,50)   | 1.0947   | -DE/DX = 0.0 | ! |
| ! R63 | R(48,51)   | 1.5475   | -DE/DX = 0.0 | ! |
| ! R64 | R(51,52)   | 1.0918   | -DE/DX = 0.0 | ! |
| ! R65 | R(53,54)   | 1.0791   | -DE/DX = 0.0 | ! |
| ! R66 | R(53,55)   | 1.3567   | -DE/DX = 0.0 | ! |
| ! R67 | R(55,56)   | 1.0772   | -DE/DX = 0.0 | ! |
| ! R68 | R(57,58)   | 1.0766   | -DE/DX = 0.0 | ! |
| ! R69 | R(60,62)   | 1.37     | -DE/DX = 0.0 | ! |
| ! R70 | R(62,63)   | 1.5      | -DE/DX = 0.0 | ! |
| ! R71 | R(62,65)   | 1.2113   | -DE/DX = 0.0 | ! |
| ! R72 | R(63,64)   | 1.3403   | -DE/DX = 0.0 | ! |
| ! R73 | R(63,71)   | 1.5135   | -DE/DX = 0.0 | ! |
| ! R74 | R(64,66)   | 1.0862   | -DE/DX = 0.0 | ! |
| ! R75 | R(64,67)   | 1.4959   | -DE/DX = 0.0 | ! |
| ! R76 | R(67,68)   | 1.09     | -DE/DX = 0.0 | ! |
| ! R77 | R(67,69)   | 1.0958   | -DE/DX = 0.0 | ! |
| ! R78 | R(67,70)   | 1.0957   | -DE/DX = 0.0 | ! |
| ! R79 | R(71,72)   | 1.0907   | -DE/DX = 0.0 | ! |
| ! R80 | R(71,73)   | 1.0947   | -DE/DX = 0.0 | ! |
| ! R81 | R(71,74)   | 1.0908   | -DE/DX = 0.0 | ! |
| ! A1  | A(2,1,3)   | 115.0591 | -DE/DX = 0.0 | ! |
| ! A2  | A(2,1,20)  | 105.3058 | -DE/DX = 0.0 | ! |
| ! A3  | A(2,1,22)  | 105.0548 | -DE/DX = 0.0 | ! |
| ! A4  | A(3,1,20)  | 105.3428 | -DE/DX = 0.0 | ! |
| ! A5  | A(3,1,22)  | 109.9326 | -DE/DX = 0.0 | ! |
| ! A6  | A(20,1,22) | 116.416  | -DE/DX = 0.0 | ! |
| ! A7  | A(1,2,7)   | 122.0461 | -DE/DX = 0.0 | ! |
| ! A8  | A(1,2,34)  | 118.858  | -DE/DX = 0.0 | ! |
| ! A9  | A(7,2,34)  | 118.9135 | -DE/DX = 0.0 | ! |
| ! A10 | A(1,3,4)   | 117.3499 | -DE/DX = 0.0 | ! |
| ! A11 | A(1,3,40)  | 120.3696 | -DE/DX = 0.0 | ! |
| ! A12 | A(1,3,59)  | 113.4708 | -DE/DX = 0.0 | ! |
| ! A13 | A(4,3,40)  | 119.7275 | -DE/DX = 0.0 | ! |
| ! A14 | A(4,3,59)  | 111.0566 | -DE/DX = 0.0 | ! |
| ! A15 | A(3,4,5)   | 108.302  | -DE/DX = 0.0 | ! |
| ! A16 | A(3,4,12)  | 116.8466 | -DE/DX = 0.0 | ! |
| ! A17 | A(3,4,36)  | 107.389  | -DE/DX = 0.0 | ! |
| ! A18 | A(5,4,12)  | 111.1131 | -DE/DX = 0.0 | ! |
| ! A19 | A(5,4,36)  | 108.5557 | -DE/DX = 0.0 | ! |
| ! A20 | A(12,4,36) | 104.2585 | -DE/DX = 0.0 | ! |
| ! A21 | A(4,5,6)   | 122.2513 | -DE/DX = 0.0 | ! |

|       |             |          |              |   |
|-------|-------------|----------|--------------|---|
| ! A22 | A(4,5,46)   | 126.1993 | -DE/DX = 0.0 | ! |
| ! A23 | A(4,5,61)   | 113.6922 | -DE/DX = 0.0 | ! |
| ! A24 | A(6,5,46)   | 108.2667 | -DE/DX = 0.0 | ! |
| ! A25 | A(6,5,61)   | 109.6384 | -DE/DX = 0.0 | ! |
| ! A26 | A(5,6,26)   | 107.3025 | -DE/DX = 0.0 | ! |
| ! A27 | A(5,6,42)   | 114.5006 | -DE/DX = 0.0 | ! |
| ! A28 | A(5,6,51)   | 102.0115 | -DE/DX = 0.0 | ! |
| ! A29 | A(26,6,42)  | 108.9149 | -DE/DX = 0.0 | ! |
| ! A30 | A(26,6,51)  | 114.0014 | -DE/DX = 0.0 | ! |
| ! A31 | A(42,6,51)  | 110.0888 | -DE/DX = 0.0 | ! |
| ! A32 | A(16,8,20)  | 117.5381 | -DE/DX = 0.0 | ! |
| ! A33 | A(16,8,29)  | 108.5195 | -DE/DX = 0.0 | ! |
| ! A34 | A(16,8,32)  | 109.3293 | -DE/DX = 0.0 | ! |
| ! A35 | A(20,8,29)  | 96.6193  | -DE/DX = 0.0 | ! |
| ! A36 | A(20,8,32)  | 106.3876 | -DE/DX = 0.0 | ! |
| ! A37 | A(29,8,32)  | 118.42   | -DE/DX = 0.0 | ! |
| ! A38 | A(10,9,11)  | 108.0925 | -DE/DX = 0.0 | ! |
| ! A39 | A(10,9,12)  | 109.175  | -DE/DX = 0.0 | ! |
| ! A40 | A(10,9,20)  | 113.7144 | -DE/DX = 0.0 | ! |
| ! A41 | A(11,9,12)  | 113.206  | -DE/DX = 0.0 | ! |
| ! A42 | A(11,9,20)  | 103.6622 | -DE/DX = 0.0 | ! |
| ! A43 | A(12,9,20)  | 108.9954 | -DE/DX = 0.0 | ! |
| ! A44 | A(9,11,29)  | 109.9018 | -DE/DX = 0.0 | ! |
| ! A45 | A(4,12,9)   | 110.398  | -DE/DX = 0.0 | ! |
| ! A46 | A(4,12,13)  | 107.0937 | -DE/DX = 0.0 | ! |
| ! A47 | A(4,12,60)  | 111.4849 | -DE/DX = 0.0 | ! |
| ! A48 | A(9,12,13)  | 110.5238 | -DE/DX = 0.0 | ! |
| ! A49 | A(9,12,60)  | 108.2508 | -DE/DX = 0.0 | ! |
| ! A50 | A(13,12,60) | 109.0922 | -DE/DX = 0.0 | ! |
| ! A51 | A(51,14,53) | 126.1692 | -DE/DX = 0.0 | ! |
| ! A52 | A(51,14,57) | 128.6558 | -DE/DX = 0.0 | ! |
| ! A53 | A(53,14,57) | 105.1666 | -DE/DX = 0.0 | ! |
| ! A54 | A(55,15,57) | 106.8013 | -DE/DX = 0.0 | ! |
| ! A55 | A(8,16,17)  | 109.074  | -DE/DX = 0.0 | ! |
| ! A56 | A(8,16,18)  | 111.1961 | -DE/DX = 0.0 | ! |
| ! A57 | A(8,16,19)  | 112.4813 | -DE/DX = 0.0 | ! |
| ! A58 | A(17,16,18) | 107.6466 | -DE/DX = 0.0 | ! |
| ! A59 | A(17,16,19) | 107.6132 | -DE/DX = 0.0 | ! |
| ! A60 | A(18,16,19) | 108.6534 | -DE/DX = 0.0 | ! |
| ! A61 | A(1,20,8)   | 120.7705 | -DE/DX = 0.0 | ! |
| ! A62 | A(1,20,9)   | 118.3732 | -DE/DX = 0.0 | ! |
| ! A63 | A(1,20,21)  | 104.0202 | -DE/DX = 0.0 | ! |
| ! A64 | A(8,20,9)   | 104.36   | -DE/DX = 0.0 | ! |
| ! A65 | A(8,20,21)  | 102.9435 | -DE/DX = 0.0 | ! |
| ! A66 | A(9,20,21)  | 104.0736 | -DE/DX = 0.0 | ! |
| ! A67 | A(1,22,23)  | 111.4272 | -DE/DX = 0.0 | ! |
| ! A68 | A(1,22,24)  | 112.3187 | -DE/DX = 0.0 | ! |
| ! A69 | A(1,22,25)  | 108.9347 | -DE/DX = 0.0 | ! |
| ! A70 | A(23,22,24) | 107.6204 | -DE/DX = 0.0 | ! |
| ! A71 | A(23,22,25) | 107.7097 | -DE/DX = 0.0 | ! |
| ! A72 | A(24,22,25) | 108.6917 | -DE/DX = 0.0 | ! |
| ! A73 | A(6,26,27)  | 110.4903 | -DE/DX = 0.0 | ! |



|        |             |          |              |   |
|--------|-------------|----------|--------------|---|
| ! A74  | A(6,26,28)  | 110.5815 | -DE/DX = 0.0 | ! |
| ! A75  | A(6,26,40)  | 111.5216 | -DE/DX = 0.0 | ! |
| ! A76  | A(27,26,28) | 107.3854 | -DE/DX = 0.0 | ! |
| ! A77  | A(27,26,40) | 108.978  | -DE/DX = 0.0 | ! |
| ! A78  | A(28,26,40) | 107.75   | -DE/DX = 0.0 | ! |
| ! A79  | A(8,29,11)  | 104.594  | -DE/DX = 0.0 | ! |
| ! A80  | A(8,29,30)  | 112.0162 | -DE/DX = 0.0 | ! |
| ! A81  | A(8,29,31)  | 113.7035 | -DE/DX = 0.0 | ! |
| ! A82  | A(11,29,30) | 109.3815 | -DE/DX = 0.0 | ! |
| ! A83  | A(11,29,31) | 107.3691 | -DE/DX = 0.0 | ! |
| ! A84  | A(30,29,31) | 109.503  | -DE/DX = 0.0 | ! |
| ! A85  | A(8,32,33)  | 119.5162 | -DE/DX = 0.0 | ! |
| ! A86  | A(8,32,34)  | 120.4387 | -DE/DX = 0.0 | ! |
| ! A87  | A(33,32,34) | 119.8989 | -DE/DX = 0.0 | ! |
| ! A88  | A(2,34,32)  | 125.2584 | -DE/DX = 0.0 | ! |
| ! A89  | A(2,34,35)  | 113.7016 | -DE/DX = 0.0 | ! |
| ! A90  | A(32,34,35) | 120.833  | -DE/DX = 0.0 | ! |
| ! A91  | A(4,36,37)  | 110.4906 | -DE/DX = 0.0 | ! |
| ! A92  | A(4,36,38)  | 110.5298 | -DE/DX = 0.0 | ! |
| ! A93  | A(4,36,39)  | 111.4425 | -DE/DX = 0.0 | ! |
| ! A94  | A(37,36,38) | 108.1527 | -DE/DX = 0.0 | ! |
| ! A95  | A(37,36,39) | 107.6004 | -DE/DX = 0.0 | ! |
| ! A96  | A(38,36,39) | 108.5092 | -DE/DX = 0.0 | ! |
| ! A97  | A(3,40,26)  | 124.7373 | -DE/DX = 0.0 | ! |
| ! A98  | A(3,40,41)  | 116.3885 | -DE/DX = 0.0 | ! |
| ! A99  | A(26,40,41) | 115.2071 | -DE/DX = 0.0 | ! |
| ! A100 | A(26,40,59) | 116.0753 | -DE/DX = 0.0 | ! |
| ! A101 | A(41,40,59) | 112.2757 | -DE/DX = 0.0 | ! |
| ! A102 | A(6,42,43)  | 108.5191 | -DE/DX = 0.0 | ! |
| ! A103 | A(6,42,44)  | 112.4207 | -DE/DX = 0.0 | ! |
| ! A104 | A(6,42,45)  | 112.2378 | -DE/DX = 0.0 | ! |
| ! A105 | A(43,42,44) | 108.0579 | -DE/DX = 0.0 | ! |
| ! A106 | A(43,42,45) | 108.0197 | -DE/DX = 0.0 | ! |
| ! A107 | A(44,42,45) | 107.4199 | -DE/DX = 0.0 | ! |
| ! A108 | A(5,46,47)  | 123.4126 | -DE/DX = 0.0 | ! |
| ! A109 | A(5,46,48)  | 109.8537 | -DE/DX = 0.0 | ! |
| ! A110 | A(47,46,48) | 121.1461 | -DE/DX = 0.0 | ! |
| ! A111 | A(47,46,61) | 115.0803 | -DE/DX = 0.0 | ! |
| ! A112 | A(48,46,61) | 111.7203 | -DE/DX = 0.0 | ! |
| ! A113 | A(46,48,49) | 112.5105 | -DE/DX = 0.0 | ! |
| ! A114 | A(46,48,50) | 109.3906 | -DE/DX = 0.0 | ! |
| ! A115 | A(46,48,51) | 103.0253 | -DE/DX = 0.0 | ! |
| ! A116 | A(49,48,50) | 107.7377 | -DE/DX = 0.0 | ! |
| ! A117 | A(49,48,51) | 111.9812 | -DE/DX = 0.0 | ! |
| ! A118 | A(50,48,51) | 112.2078 | -DE/DX = 0.0 | ! |
| ! A119 | A(6,51,14)  | 116.6156 | -DE/DX = 0.0 | ! |
| ! A120 | A(6,51,48)  | 104.3539 | -DE/DX = 0.0 | ! |
| ! A121 | A(6,51,52)  | 106.1635 | -DE/DX = 0.0 | ! |
| ! A122 | A(14,51,48) | 115.1809 | -DE/DX = 0.0 | ! |
| ! A123 | A(14,51,52) | 107.0351 | -DE/DX = 0.0 | ! |
| ! A124 | A(48,51,52) | 106.7881 | -DE/DX = 0.0 | ! |
| ! A125 | A(14,53,54) | 127.0085 | -DE/DX = 0.0 | ! |

|                    |           |              |   |
|--------------------|-----------|--------------|---|
| ! A126 A(14,53,55) | 106.8606  | -DE/DX = 0.0 | ! |
| ! A127 A(54,53,55) | 126.1289  | -DE/DX = 0.0 | ! |
| ! A128 A(15,55,53) | 110.235   | -DE/DX = 0.0 | ! |
| ! A129 A(15,55,56) | 116.0609  | -DE/DX = 0.0 | ! |
| ! A130 A(53,55,56) | 133.7024  | -DE/DX = 0.0 | ! |
| ! A131 A(14,57,15) | 110.9356  | -DE/DX = 0.0 | ! |
| ! A132 A(14,57,58) | 133.6488  | -DE/DX = 0.0 | ! |
| ! A133 A(15,57,58) | 115.4153  | -DE/DX = 0.0 | ! |
| ! A134 A(12,60,62) | 122.2629  | -DE/DX = 0.0 | ! |
| ! A135 A(60,62,63) | 119.4932  | -DE/DX = 0.0 | ! |
| ! A136 A(60,62,65) | 117.1467  | -DE/DX = 0.0 | ! |
| ! A137 A(63,62,65) | 123.0718  | -DE/DX = 0.0 | ! |
| ! A138 A(62,63,64) | 116.7661  | -DE/DX = 0.0 | ! |
| ! A139 A(62,63,71) | 118.5815  | -DE/DX = 0.0 | ! |
| ! A140 A(64,63,71) | 124.5124  | -DE/DX = 0.0 | ! |
| ! A141 A(63,64,66) | 117.2641  | -DE/DX = 0.0 | ! |
| ! A142 A(63,64,67) | 127.2514  | -DE/DX = 0.0 | ! |
| ! A143 A(66,64,67) | 115.47    | -DE/DX = 0.0 | ! |
| ! A144 A(64,67,68) | 113.4659  | -DE/DX = 0.0 | ! |
| ! A145 A(64,67,69) | 110.1136  | -DE/DX = 0.0 | ! |
| ! A146 A(64,67,70) | 110.2071  | -DE/DX = 0.0 | ! |
| ! A147 A(68,67,69) | 108.0324  | -DE/DX = 0.0 | ! |
| ! A148 A(68,67,70) | 108.4587  | -DE/DX = 0.0 | ! |
| ! A149 A(69,67,70) | 106.2837  | -DE/DX = 0.0 | ! |
| ! A150 A(63,71,72) | 111.0742  | -DE/DX = 0.0 | ! |
| ! A151 A(63,71,73) | 112.906   | -DE/DX = 0.0 | ! |
| ! A152 A(63,71,74) | 110.4081  | -DE/DX = 0.0 | ! |
| ! A153 A(72,71,73) | 107.7672  | -DE/DX = 0.0 | ! |
| ! A154 A(72,71,74) | 107.3475  | -DE/DX = 0.0 | ! |
| ! A155 A(73,71,74) | 107.0925  | -DE/DX = 0.0 | ! |
| ! D1 D(3,1,2,7)    | -55.1299  | -DE/DX = 0.0 | ! |
| ! D2 D(3,1,2,34)   | 129.834   | -DE/DX = 0.0 | ! |
| ! D3 D(20,1,2,7)   | -170.6476 | -DE/DX = 0.0 | ! |
| ! D4 D(20,1,2,34)  | 14.3163   | -DE/DX = 0.0 | ! |
| ! D5 D(22,1,2,7)   | 65.8994   | -DE/DX = 0.0 | ! |
| ! D6 D(22,1,2,34)  | -109.1366 | -DE/DX = 0.0 | ! |
| ! D7 D(2,1,3,4)    | -154.3084 | -DE/DX = 0.0 | ! |
| ! D8 D(2,1,3,40)   | 7.5273    | -DE/DX = 0.0 | ! |
| ! D9 D(2,1,3,59)   | 73.9645   | -DE/DX = 0.0 | ! |
| ! D10 D(20,1,3,4)  | -38.8119  | -DE/DX = 0.0 | ! |
| ! D11 D(20,1,3,40) | 123.0237  | -DE/DX = 0.0 | ! |
| ! D12 D(20,1,3,59) | -170.5391 | -DE/DX = 0.0 | ! |
| ! D13 D(22,1,3,4)  | 87.3609   | -DE/DX = 0.0 | ! |
| ! D14 D(22,1,3,40) | -110.8035 | -DE/DX = 0.0 | ! |
| ! D15 D(22,1,3,59) | -44.3663  | -DE/DX = 0.0 | ! |
| ! D16 D(2,1,20,8)  | -49.39    | -DE/DX = 0.0 | ! |
| ! D17 D(2,1,20,9)  | -179.9046 | -DE/DX = 0.0 | ! |
| ! D18 D(2,1,20,21) | 65.2788   | -DE/DX = 0.0 | ! |
| ! D19 D(3,1,20,8)  | -171.4256 | -DE/DX = 0.0 | ! |
| ! D20 D(3,1,20,9)  | 58.0598   | -DE/DX = 0.0 | ! |
| ! D21 D(3,1,20,21) | -56.7569  | -DE/DX = 0.0 | ! |
| ! D22 D(22,1,20,8) | 66.4997   | -DE/DX = 0.0 | ! |

|       |               |           |              |   |
|-------|---------------|-----------|--------------|---|
| ! D23 | D(22,1,20,9)  | -64.0149  | -DE/DX = 0.0 | ! |
| ! D24 | D(22,1,20,21) | -178.8315 | -DE/DX = 0.0 | ! |
| ! D25 | D(2,1,22,23)  | 40.8735   | -DE/DX = 0.0 | ! |
| ! D26 | D(2,1,22,24)  | 161.7122  | -DE/DX = 0.0 | ! |
| ! D27 | D(2,1,22,25)  | -77.8187  | -DE/DX = 0.0 | ! |
| ! D28 | D(3,1,22,23)  | 165.2131  | -DE/DX = 0.0 | ! |
| ! D29 | D(3,1,22,24)  | -73.9482  | -DE/DX = 0.0 | ! |
| ! D30 | D(3,1,22,25)  | 46.5209   | -DE/DX = 0.0 | ! |
| ! D31 | D(20,1,22,23) | -75.1561  | -DE/DX = 0.0 | ! |
| ! D32 | D(20,1,22,24) | 45.6826   | -DE/DX = 0.0 | ! |
| ! D33 | D(20,1,22,25) | 166.1517  | -DE/DX = 0.0 | ! |
| ! D34 | D(1,2,34,32)  | 9.2672    | -DE/DX = 0.0 | ! |
| ! D35 | D(1,2,34,35)  | -175.9511 | -DE/DX = 0.0 | ! |
| ! D36 | D(7,2,34,32)  | -165.9264 | -DE/DX = 0.0 | ! |
| ! D37 | D(7,2,34,35)  | 8.8552    | -DE/DX = 0.0 | ! |
| ! D38 | D(1,3,4,5)    | 160.7282  | -DE/DX = 0.0 | ! |
| ! D39 | D(1,3,4,12)   | 34.3829   | -DE/DX = 0.0 | ! |
| ! D40 | D(1,3,4,36)   | -82.2187  | -DE/DX = 0.0 | ! |
| ! D41 | D(40,3,4,5)   | -1.2289   | -DE/DX = 0.0 | ! |
| ! D42 | D(40,3,4,12)  | -127.5742 | -DE/DX = 0.0 | ! |
| ! D43 | D(40,3,4,36)  | 115.8242  | -DE/DX = 0.0 | ! |
| ! D44 | D(59,3,4,5)   | -66.4573  | -DE/DX = 0.0 | ! |
| ! D45 | D(59,3,4,12)  | 167.1974  | -DE/DX = 0.0 | ! |
| ! D46 | D(59,3,4,36)  | 50.5958   | -DE/DX = 0.0 | ! |
| ! D47 | D(1,3,40,26)  | -157.7032 | -DE/DX = 0.0 | ! |
| ! D48 | D(1,3,40,41)  | -0.3982   | -DE/DX = 0.0 | ! |
| ! D49 | D(4,3,40,26)  | 3.7028    | -DE/DX = 0.0 | ! |
| ! D50 | D(4,3,40,41)  | 161.0078  | -DE/DX = 0.0 | ! |
| ! D51 | D(3,4,5,6)    | -31.7632  | -DE/DX = 0.0 | ! |
| ! D52 | D(3,4,5,46)   | 171.1527  | -DE/DX = 0.0 | ! |
| ! D53 | D(3,4,5,61)   | 103.5411  | -DE/DX = 0.0 | ! |
| ! D54 | D(12,4,5,6)   | 97.8506   | -DE/DX = 0.0 | ! |
| ! D55 | D(12,4,5,46)  | -59.2335  | -DE/DX = 0.0 | ! |
| ! D56 | D(12,4,5,61)  | -126.8452 | -DE/DX = 0.0 | ! |
| ! D57 | D(36,4,5,6)   | -148.063  | -DE/DX = 0.0 | ! |
| ! D58 | D(36,4,5,46)  | 54.8529   | -DE/DX = 0.0 | ! |
| ! D59 | D(36,4,5,61)  | -12.7587  | -DE/DX = 0.0 | ! |
| ! D60 | D(3,4,12,9)   | -39.4947  | -DE/DX = 0.0 | ! |
| ! D61 | D(3,4,12,13)  | -159.8721 | -DE/DX = 0.0 | ! |
| ! D62 | D(3,4,12,60)  | 80.8661   | -DE/DX = 0.0 | ! |
| ! D63 | D(5,4,12,9)   | -164.4355 | -DE/DX = 0.0 | ! |
| ! D64 | D(5,4,12,13)  | 75.1871   | -DE/DX = 0.0 | ! |
| ! D65 | D(5,4,12,60)  | -44.0747  | -DE/DX = 0.0 | ! |
| ! D66 | D(36,4,12,9)  | 78.8147   | -DE/DX = 0.0 | ! |
| ! D67 | D(36,4,12,13) | -41.5626  | -DE/DX = 0.0 | ! |
| ! D68 | D(36,4,12,60) | -160.8244 | -DE/DX = 0.0 | ! |
| ! D69 | D(3,4,36,37)  | -170.4551 | -DE/DX = 0.0 | ! |
| ! D70 | D(3,4,36,38)  | -50.7795  | -DE/DX = 0.0 | ! |
| ! D71 | D(3,4,36,39)  | 69.969    | -DE/DX = 0.0 | ! |
| ! D72 | D(5,4,36,37)  | -53.5681  | -DE/DX = 0.0 | ! |
| ! D73 | D(5,4,36,38)  | 66.1075   | -DE/DX = 0.0 | ! |
| ! D74 | D(5,4,36,39)  | -173.144  | -DE/DX = 0.0 | ! |

|        |               |           |              |   |
|--------|---------------|-----------|--------------|---|
| ! D75  | D(12,4,36,37) | 64.944    | -DE/DX = 0.0 | ! |
| ! D76  | D(12,4,36,38) | -175.3804 | -DE/DX = 0.0 | ! |
| ! D77  | D(12,4,36,39) | -54.6319  | -DE/DX = 0.0 | ! |
| ! D78  | D(4,5,6,26)   | 59.8821   | -DE/DX = 0.0 | ! |
| ! D79  | D(4,5,6,42)   | -61.1217  | -DE/DX = 0.0 | ! |
| ! D80  | D(4,5,6,51)   | -179.9952 | -DE/DX = 0.0 | ! |
| ! D81  | D(46,5,6,26)  | -139.4408 | -DE/DX = 0.0 | ! |
| ! D82  | D(46,5,6,42)  | 99.5555   | -DE/DX = 0.0 | ! |
| ! D83  | D(46,5,6,51)  | -19.3181  | -DE/DX = 0.0 | ! |
| ! D84  | D(61,5,6,26)  | -76.9735  | -DE/DX = 0.0 | ! |
| ! D85  | D(61,5,6,42)  | 162.0227  | -DE/DX = 0.0 | ! |
| ! D86  | D(61,5,6,51)  | 43.1492   | -DE/DX = 0.0 | ! |
| ! D87  | D(4,5,46,47)  | 4.0084    | -DE/DX = 0.0 | ! |
| ! D88  | D(4,5,46,48)  | 157.7738  | -DE/DX = 0.0 | ! |
| ! D89  | D(6,5,46,47)  | -155.7011 | -DE/DX = 0.0 | ! |
| ! D90  | D(6,5,46,48)  | -1.9358   | -DE/DX = 0.0 | ! |
| ! D91  | D(5,6,26,27)  | -171.9656 | -DE/DX = 0.0 | ! |
| ! D92  | D(5,6,26,28)  | 69.2803   | -DE/DX = 0.0 | ! |
| ! D93  | D(5,6,26,40)  | -50.5963  | -DE/DX = 0.0 | ! |
| ! D94  | D(42,6,26,27) | -47.501   | -DE/DX = 0.0 | ! |
| ! D95  | D(42,6,26,28) | -166.2551 | -DE/DX = 0.0 | ! |
| ! D96  | D(42,6,26,40) | 73.8683   | -DE/DX = 0.0 | ! |
| ! D97  | D(51,6,26,27) | 75.8675   | -DE/DX = 0.0 | ! |
| ! D98  | D(51,6,26,28) | -42.8866  | -DE/DX = 0.0 | ! |
| ! D99  | D(51,6,26,40) | -162.7632 | -DE/DX = 0.0 | ! |
| ! D100 | D(5,6,42,43)  | -178.8413 | -DE/DX = 0.0 | ! |
| ! D101 | D(5,6,42,44)  | -59.3795  | -DE/DX = 0.0 | ! |
| ! D102 | D(5,6,42,45)  | 61.857    | -DE/DX = 0.0 | ! |
| ! D103 | D(26,6,42,43) | 61.0481   | -DE/DX = 0.0 | ! |
| ! D104 | D(26,6,42,44) | -179.4901 | -DE/DX = 0.0 | ! |
| ! D105 | D(26,6,42,45) | -58.2536  | -DE/DX = 0.0 | ! |
| ! D106 | D(51,6,42,43) | -64.6245  | -DE/DX = 0.0 | ! |
| ! D107 | D(51,6,42,44) | 54.8373   | -DE/DX = 0.0 | ! |
| ! D108 | D(51,6,42,45) | 176.0738  | -DE/DX = 0.0 | ! |
| ! D109 | D(5,6,51,14)  | 161.2716  | -DE/DX = 0.0 | ! |
| ! D110 | D(5,6,51,48)  | 32.9937   | -DE/DX = 0.0 | ! |
| ! D111 | D(5,6,51,52)  | -79.6239  | -DE/DX = 0.0 | ! |
| ! D112 | D(26,6,51,14) | -83.4137  | -DE/DX = 0.0 | ! |
| ! D113 | D(26,6,51,48) | 148.3084  | -DE/DX = 0.0 | ! |
| ! D114 | D(26,6,51,52) | 35.6908   | -DE/DX = 0.0 | ! |
| ! D115 | D(42,6,51,14) | 39.3158   | -DE/DX = 0.0 | ! |
| ! D116 | D(42,6,51,48) | -88.962   | -DE/DX = 0.0 | ! |
| ! D117 | D(42,6,51,52) | 158.4203  | -DE/DX = 0.0 | ! |
| ! D118 | D(20,8,16,17) | -173.8232 | -DE/DX = 0.0 | ! |
| ! D119 | D(20,8,16,18) | -55.2606  | -DE/DX = 0.0 | ! |
| ! D120 | D(20,8,16,19) | 66.863    | -DE/DX = 0.0 | ! |
| ! D121 | D(29,8,16,17) | -65.6579  | -DE/DX = 0.0 | ! |
| ! D122 | D(29,8,16,18) | 52.9047   | -DE/DX = 0.0 | ! |
| ! D123 | D(29,8,16,19) | 175.0283  | -DE/DX = 0.0 | ! |
| ! D124 | D(32,8,16,17) | 64.8388   | -DE/DX = 0.0 | ! |
| ! D125 | D(32,8,16,18) | -176.5985 | -DE/DX = 0.0 | ! |
| ! D126 | D(32,8,16,19) | -54.475   | -DE/DX = 0.0 | ! |

|                       |           |              |   |
|-----------------------|-----------|--------------|---|
| ! D127 D(16,8,20,1)   | -65.648   | -DE/DX = 0.0 | ! |
| ! D128 D(16,8,20,9)   | 70.6834   | -DE/DX = 0.0 | ! |
| ! D129 D(16,8,20,21)  | 179.1283  | -DE/DX = 0.0 | ! |
| ! D130 D(29,8,20,1)   | 179.4465  | -DE/DX = 0.0 | ! |
| ! D131 D(29,8,20,9)   | -44.2221  | -DE/DX = 0.0 | ! |
| ! D132 D(29,8,20,21)  | 64.2228   | -DE/DX = 0.0 | ! |
| ! D133 D(32,8,20,1)   | 57.2016   | -DE/DX = 0.0 | ! |
| ! D134 D(32,8,20,9)   | -166.4671 | -DE/DX = 0.0 | ! |
| ! D135 D(32,8,20,21)  | -58.0221  | -DE/DX = 0.0 | ! |
| ! D136 D(16,8,29,11)  | -82.4567  | -DE/DX = 0.0 | ! |
| ! D137 D(16,8,29,30)  | 159.1726  | -DE/DX = 0.0 | ! |
| ! D138 D(16,8,29,31)  | 34.3648   | -DE/DX = 0.0 | ! |
| ! D139 D(20,8,29,11)  | 39.5306   | -DE/DX = 0.0 | ! |
| ! D140 D(20,8,29,30)  | -78.8401  | -DE/DX = 0.0 | ! |
| ! D141 D(20,8,29,31)  | 156.3522  | -DE/DX = 0.0 | ! |
| ! D142 D(32,8,29,11)  | 152.2207  | -DE/DX = 0.0 | ! |
| ! D143 D(32,8,29,30)  | 33.85     | -DE/DX = 0.0 | ! |
| ! D144 D(32,8,29,31)  | -90.9578  | -DE/DX = 0.0 | ! |
| ! D145 D(16,8,32,33)  | -75.4269  | -DE/DX = 0.0 | ! |
| ! D146 D(16,8,32,34)  | 100.1753  | -DE/DX = 0.0 | ! |
| ! D147 D(20,8,32,33)  | 156.7041  | -DE/DX = 0.0 | ! |
| ! D148 D(20,8,32,34)  | -27.6937  | -DE/DX = 0.0 | ! |
| ! D149 D(29,8,32,33)  | 49.501    | -DE/DX = 0.0 | ! |
| ! D150 D(29,8,32,34)  | -134.8968 | -DE/DX = 0.0 | ! |
| ! D151 D(10,9,11,29)  | 113.928   | -DE/DX = 0.0 | ! |
| ! D152 D(12,9,11,29)  | -125.0061 | -DE/DX = 0.0 | ! |
| ! D153 D(20,9,11,29)  | -7.0581   | -DE/DX = 0.0 | ! |
| ! D154 D(10,9,12,4)   | -72.3446  | -DE/DX = 0.0 | ! |
| ! D155 D(10,9,12,13)  | 45.9537   | -DE/DX = 0.0 | ! |
| ! D156 D(10,9,12,60)  | 165.3737  | -DE/DX = 0.0 | ! |
| ! D157 D(11,9,12,4)   | 167.2029  | -DE/DX = 0.0 | ! |
| ! D158 D(11,9,12,13)  | -74.4988  | -DE/DX = 0.0 | ! |
| ! D159 D(11,9,12,60)  | 44.9212   | -DE/DX = 0.0 | ! |
| ! D160 D(20,9,12,4)   | 52.408    | -DE/DX = 0.0 | ! |
| ! D161 D(20,9,12,13)  | 170.7062  | -DE/DX = 0.0 | ! |
| ! D162 D(20,9,12,60)  | -69.8737  | -DE/DX = 0.0 | ! |
| ! D163 D(10,9,20,1)   | 53.8703   | -DE/DX = 0.0 | ! |
| ! D164 D(10,9,20,8)   | -83.7312  | -DE/DX = 0.0 | ! |
| ! D165 D(10,9,20,21)  | 168.658   | -DE/DX = 0.0 | ! |
| ! D166 D(11,9,20,1)   | 170.9896  | -DE/DX = 0.0 | ! |
| ! D167 D(11,9,20,8)   | 33.3881   | -DE/DX = 0.0 | ! |
| ! D168 D(11,9,20,21)  | -74.2227  | -DE/DX = 0.0 | ! |
| ! D169 D(12,9,20,1)   | -68.1772  | -DE/DX = 0.0 | ! |
| ! D170 D(12,9,20,8)   | 154.2213  | -DE/DX = 0.0 | ! |
| ! D171 D(12,9,20,21)  | 46.6105   | -DE/DX = 0.0 | ! |
| ! D172 D(9,11,29,8)   | -21.5706  | -DE/DX = 0.0 | ! |
| ! D173 D(9,11,29,30)  | 98.5772   | -DE/DX = 0.0 | ! |
| ! D174 D(9,11,29,31)  | -142.6814 | -DE/DX = 0.0 | ! |
| ! D175 D(4,12,60,62)  | 164.8348  | -DE/DX = 0.0 | ! |
| ! D176 D(9,12,60,62)  | -73.5505  | -DE/DX = 0.0 | ! |
| ! D177 D(13,12,60,62) | 46.7674   | -DE/DX = 0.0 | ! |
| ! D178 D(53,14,51,6)  | 76.1367   | -DE/DX = 0.0 | ! |

|        |                |           |              |   |
|--------|----------------|-----------|--------------|---|
| ! D179 | D(53,14,51,48) | -161.0426 | -DE/DX = 0.0 | ! |
| ! D180 | D(53,14,51,52) | -42.4965  | -DE/DX = 0.0 | ! |
| ! D181 | D(57,14,51,6)  | -105.0756 | -DE/DX = 0.0 | ! |
| ! D182 | D(57,14,51,48) | 17.7451   | -DE/DX = 0.0 | ! |
| ! D183 | D(57,14,51,52) | 136.2913  | -DE/DX = 0.0 | ! |
| ! D184 | D(51,14,53,54) | -0.1703   | -DE/DX = 0.0 | ! |
| ! D185 | D(51,14,53,55) | 179.3248  | -DE/DX = 0.0 | ! |
| ! D186 | D(57,14,53,54) | -179.1895 | -DE/DX = 0.0 | ! |
| ! D187 | D(57,14,53,55) | 0.3056    | -DE/DX = 0.0 | ! |
| ! D188 | D(51,14,57,15) | -179.2387 | -DE/DX = 0.0 | ! |
| ! D189 | D(51,14,57,58) | 0.5377    | -DE/DX = 0.0 | ! |
| ! D190 | D(53,14,57,15) | -0.2526   | -DE/DX = 0.0 | ! |
| ! D191 | D(53,14,57,58) | 179.5238  | -DE/DX = 0.0 | ! |
| ! D192 | D(57,15,55,53) | 0.1015    | -DE/DX = 0.0 | ! |
| ! D193 | D(57,15,55,56) | 179.6907  | -DE/DX = 0.0 | ! |
| ! D194 | D(55,15,57,14) | 0.105     | -DE/DX = 0.0 | ! |
| ! D195 | D(55,15,57,58) | -179.7159 | -DE/DX = 0.0 | ! |
| ! D196 | D(6,26,40,3)   | 24.4084   | -DE/DX = 0.0 | ! |
| ! D197 | D(6,26,40,41)  | -133.1341 | -DE/DX = 0.0 | ! |
| ! D198 | D(6,26,40,59)  | 92.6964   | -DE/DX = 0.0 | ! |
| ! D199 | D(27,26,40,3)  | 146.6525  | -DE/DX = 0.0 | ! |
| ! D200 | D(27,26,40,41) | -10.89    | -DE/DX = 0.0 | ! |
| ! D201 | D(27,26,40,59) | -145.0595 | -DE/DX = 0.0 | ! |
| ! D202 | D(28,26,40,3)  | -97.1256  | -DE/DX = 0.0 | ! |
| ! D203 | D(28,26,40,41) | 105.3319  | -DE/DX = 0.0 | ! |
| ! D204 | D(28,26,40,59) | -28.8376  | -DE/DX = 0.0 | ! |
| ! D205 | D(8,32,34,2)   | -1.5171   | -DE/DX = 0.0 | ! |
| ! D206 | D(8,32,34,35)  | -175.9514 | -DE/DX = 0.0 | ! |
| ! D207 | D(33,32,34,2)  | 174.0683  | -DE/DX = 0.0 | ! |
| ! D208 | D(33,32,34,35) | -0.366    | -DE/DX = 0.0 | ! |
| ! D209 | D(5,46,48,49)  | 143.696   | -DE/DX = 0.0 | ! |
| ! D210 | D(5,46,48,50)  | -96.6023  | -DE/DX = 0.0 | ! |
| ! D211 | D(5,46,48,51)  | 22.9159   | -DE/DX = 0.0 | ! |
| ! D212 | D(47,46,48,49) | -61.8438  | -DE/DX = 0.0 | ! |
| ! D213 | D(47,46,48,50) | 57.8579   | -DE/DX = 0.0 | ! |
| ! D214 | D(47,46,48,51) | 177.3762  | -DE/DX = 0.0 | ! |
| ! D215 | D(61,46,48,49) | 78.8596   | -DE/DX = 0.0 | ! |
| ! D216 | D(61,46,48,50) | -161.4387 | -DE/DX = 0.0 | ! |
| ! D217 | D(61,46,48,51) | -41.9204  | -DE/DX = 0.0 | ! |
| ! D218 | D(46,48,51,6)  | -34.3925  | -DE/DX = 0.0 | ! |
| ! D219 | D(46,48,51,14) | -163.5395 | -DE/DX = 0.0 | ! |
| ! D220 | D(46,48,51,52) | 77.7768   | -DE/DX = 0.0 | ! |
| ! D221 | D(49,48,51,6)  | -155.5334 | -DE/DX = 0.0 | ! |
| ! D222 | D(49,48,51,14) | 75.3196   | -DE/DX = 0.0 | ! |
| ! D223 | D(49,48,51,52) | -43.3642  | -DE/DX = 0.0 | ! |
| ! D224 | D(50,48,51,6)  | 83.1574   | -DE/DX = 0.0 | ! |
| ! D225 | D(50,48,51,14) | -45.9895  | -DE/DX = 0.0 | ! |
| ! D226 | D(50,48,51,52) | -164.6733 | -DE/DX = 0.0 | ! |
| ! D227 | D(14,53,55,15) | -0.2541   | -DE/DX = 0.0 | ! |
| ! D228 | D(14,53,55,56) | -179.7436 | -DE/DX = 0.0 | ! |
| ! D229 | D(54,53,55,15) | 179.2466  | -DE/DX = 0.0 | ! |
| ! D230 | D(54,53,55,56) | -0.2429   | -DE/DX = 0.0 | ! |

|        |                |           |              |   |
|--------|----------------|-----------|--------------|---|
| ! D231 | D(12,60,62,63) | -40.5681  | -DE/DX = 0.0 | ! |
| ! D232 | D(12,60,62,65) | 145.4084  | -DE/DX = 0.0 | ! |
| ! D233 | D(60,62,63,64) | 138.214   | -DE/DX = 0.0 | ! |
| ! D234 | D(60,62,63,71) | -45.8923  | -DE/DX = 0.0 | ! |
| ! D235 | D(65,62,63,64) | -48.1339  | -DE/DX = 0.0 | ! |
| ! D236 | D(65,62,63,71) | 127.7598  | -DE/DX = 0.0 | ! |
| ! D237 | D(62,63,64,66) | -2.7197   | -DE/DX = 0.0 | ! |
| ! D238 | D(62,63,64,67) | 178.7359  | -DE/DX = 0.0 | ! |
| ! D239 | D(71,63,64,66) | -178.3431 | -DE/DX = 0.0 | ! |
| ! D240 | D(71,63,64,67) | 3.1125    | -DE/DX = 0.0 | ! |
| ! D241 | D(62,63,71,72) | -23.6737  | -DE/DX = 0.0 | ! |
| ! D242 | D(62,63,71,73) | 97.514    | -DE/DX = 0.0 | ! |
| ! D243 | D(62,63,71,74) | -142.6411 | -DE/DX = 0.0 | ! |
| ! D244 | D(64,63,71,72) | 151.8762  | -DE/DX = 0.0 | ! |
| ! D245 | D(64,63,71,73) | -86.936   | -DE/DX = 0.0 | ! |
| ! D246 | D(64,63,71,74) | 32.9089   | -DE/DX = 0.0 | ! |
| ! D247 | D(63,64,67,68) | -2.6458   | -DE/DX = 0.0 | ! |
| ! D248 | D(63,64,67,69) | 118.5765  | -DE/DX = 0.0 | ! |
| ! D249 | D(63,64,67,70) | -124.4883 | -DE/DX = 0.0 | ! |
| ! D250 | D(66,64,67,68) | 178.7874  | -DE/DX = 0.0 | ! |
| ! D251 | D(66,64,67,69) | -59.9903  | -DE/DX = 0.0 | ! |
| ! D252 | D(66,64,67,70) | 56.9449   | -DE/DX = 0.0 | ! |

## 5. opt=tight b3pw91/6-311++g(d,p) nosymm

| -----                       |            |        |                  |   |
|-----------------------------|------------|--------|------------------|---|
| ! Optimized Parameters !    |            |        |                  |   |
| ! (Angstroms and Degrees) ! |            |        |                  |   |
| -----                       |            |        |                  |   |
| ! Name                      | Definition | Value  | Derivative Info. | ! |
| -----                       |            |        |                  |   |
| ! R1                        | R(1,2)     | 1.5521 | -DE/DX = 0.0     | ! |
| ! R2                        | R(1,3)     | 1.5719 | -DE/DX = 0.0     | ! |
| ! R3                        | R(1,20)    | 1.5153 | -DE/DX = 0.0     | ! |
| ! R4                        | R(1,22)    | 1.5439 | -DE/DX = 0.0     | ! |
| ! R5                        | R(2,7)     | 1.2152 | -DE/DX = 0.0     | ! |
| ! R6                        | R(2,34)    | 1.492  | -DE/DX = 0.0     | ! |
| ! R7                        | R(3,4)     | 1.5866 | -DE/DX = 0.0     | ! |
| ! R8                        | R(3,40)    | 1.4931 | -DE/DX = 0.0     | ! |
| ! R9                        | R(3,59)    | 1.4236 | -DE/DX = 0.0     | ! |
| ! R10                       | R(4,5)     | 1.5473 | -DE/DX = 0.0     | ! |
| ! R11                       | R(4,12)    | 1.5676 | -DE/DX = 0.0     | ! |
| ! R12                       | R(4,36)    | 1.5471 | -DE/DX = 0.0     | ! |
| ! R13                       | R(5,6)     | 1.5401 | -DE/DX = 0.0     | ! |
| ! R14                       | R(5,46)    | 1.4686 | -DE/DX = 0.0     | ! |
| ! R15                       | R(5,61)    | 1.4473 | -DE/DX = 0.0     | ! |
| ! R16                       | R(6,26)    | 1.5246 | -DE/DX = 0.0     | ! |
| ! R17                       | R(6,42)    | 1.5298 | -DE/DX = 0.0     | ! |
| ! R18                       | R(6,51)    | 1.5724 | -DE/DX = 0.0     | ! |
| ! R19                       | R(8,16)    | 1.5405 | -DE/DX = 0.0     | ! |
| ! R20                       | R(8,20)    | 1.5276 | -DE/DX = 0.0     | ! |

|       |          |        |              |   |
|-------|----------|--------|--------------|---|
| ! R21 | R(8,29)  | 1.5416 | -DE/DX = 0.0 | ! |
| ! R22 | R(8,32)  | 1.4958 | -DE/DX = 0.0 | ! |
| ! R23 | R(9,10)  | 1.0952 | -DE/DX = 0.0 | ! |
| ! R24 | R(9,11)  | 1.4304 | -DE/DX = 0.0 | ! |
| ! R25 | R(9,12)  | 1.5311 | -DE/DX = 0.0 | ! |
| ! R26 | R(9,20)  | 1.4999 | -DE/DX = 0.0 | ! |
| ! R27 | R(11,29) | 1.4438 | -DE/DX = 0.0 | ! |
| ! R28 | R(12,13) | 1.0936 | -DE/DX = 0.0 | ! |
| ! R29 | R(12,60) | 1.4255 | -DE/DX = 0.0 | ! |
| ! R30 | R(14,51) | 1.4953 | -DE/DX = 0.0 | ! |
| ! R31 | R(14,53) | 1.4387 | -DE/DX = 0.0 | ! |
| ! R32 | R(14,57) | 1.3614 | -DE/DX = 0.0 | ! |
| ! R33 | R(15,55) | 1.3548 | -DE/DX = 0.0 | ! |
| ! R34 | R(15,57) | 1.3592 | -DE/DX = 0.0 | ! |
| ! R35 | R(16,17) | 1.0947 | -DE/DX = 0.0 | ! |
| ! R36 | R(16,18) | 1.0933 | -DE/DX = 0.0 | ! |
| ! R37 | R(16,19) | 1.0893 | -DE/DX = 0.0 | ! |
| ! R38 | R(20,21) | 1.1004 | -DE/DX = 0.0 | ! |
| ! R39 | R(22,23) | 1.0912 | -DE/DX = 0.0 | ! |
| ! R40 | R(22,24) | 1.0915 | -DE/DX = 0.0 | ! |
| ! R41 | R(22,25) | 1.0905 | -DE/DX = 0.0 | ! |
| ! R42 | R(26,27) | 1.0944 | -DE/DX = 0.0 | ! |
| ! R43 | R(26,28) | 1.0953 | -DE/DX = 0.0 | ! |
| ! R44 | R(26,40) | 1.5137 | -DE/DX = 0.0 | ! |
| ! R45 | R(29,30) | 1.0964 | -DE/DX = 0.0 | ! |
| ! R46 | R(29,31) | 1.0926 | -DE/DX = 0.0 | ! |
| ! R47 | R(32,33) | 1.0891 | -DE/DX = 0.0 | ! |
| ! R48 | R(32,34) | 1.3422 | -DE/DX = 0.0 | ! |
| ! R49 | R(34,35) | 1.0862 | -DE/DX = 0.0 | ! |
| ! R50 | R(36,37) | 1.0921 | -DE/DX = 0.0 | ! |
| ! R51 | R(36,38) | 1.0872 | -DE/DX = 0.0 | ! |
| ! R52 | R(36,39) | 1.0906 | -DE/DX = 0.0 | ! |
| ! R53 | R(40,41) | 1.084  | -DE/DX = 0.0 | ! |
| ! R54 | R(40,59) | 1.4282 | -DE/DX = 0.0 | ! |
| ! R55 | R(42,43) | 1.0934 | -DE/DX = 0.0 | ! |
| ! R56 | R(42,44) | 1.0906 | -DE/DX = 0.0 | ! |
| ! R57 | R(42,45) | 1.0894 | -DE/DX = 0.0 | ! |
| ! R58 | R(46,47) | 1.087  | -DE/DX = 0.0 | ! |
| ! R59 | R(46,48) | 1.5088 | -DE/DX = 0.0 | ! |
| ! R60 | R(46,61) | 1.4254 | -DE/DX = 0.0 | ! |
| ! R61 | R(48,49) | 1.094  | -DE/DX = 0.0 | ! |
| ! R62 | R(48,50) | 1.0961 | -DE/DX = 0.0 | ! |
| ! R63 | R(48,51) | 1.5408 | -DE/DX = 0.0 | ! |
| ! R64 | R(51,52) | 1.0933 | -DE/DX = 0.0 | ! |
| ! R65 | R(53,54) | 1.0799 | -DE/DX = 0.0 | ! |
| ! R66 | R(53,55) | 1.3559 | -DE/DX = 0.0 | ! |
| ! R67 | R(55,56) | 1.0781 | -DE/DX = 0.0 | ! |
| ! R68 | R(57,58) | 1.0776 | -DE/DX = 0.0 | ! |
| ! R69 | R(60,62) | 1.3743 | -DE/DX = 0.0 | ! |
| ! R70 | R(62,63) | 1.4956 | -DE/DX = 0.0 | ! |
| ! R71 | R(62,65) | 1.2046 | -DE/DX = 0.0 | ! |
| ! R72 | R(63,64) | 1.3394 | -DE/DX = 0.0 | ! |



|       |            |          |              |   |
|-------|------------|----------|--------------|---|
| ! R73 | R(63,71)   | 1.5071   | -DE/DX = 0.0 | ! |
| ! R74 | R(64,66)   | 1.0869   | -DE/DX = 0.0 | ! |
| ! R75 | R(64,67)   | 1.4898   | -DE/DX = 0.0 | ! |
| ! R76 | R(67,68)   | 1.091    | -DE/DX = 0.0 | ! |
| ! R77 | R(67,69)   | 1.0964   | -DE/DX = 0.0 | ! |
| ! R78 | R(67,70)   | 1.0963   | -DE/DX = 0.0 | ! |
| ! R79 | R(71,72)   | 1.09     | -DE/DX = 0.0 | ! |
| ! R80 | R(71,73)   | 1.096    | -DE/DX = 0.0 | ! |
| ! R81 | R(71,74)   | 1.0928   | -DE/DX = 0.0 | ! |
| ! A1  | A(2,1,3)   | 115.3042 | -DE/DX = 0.0 | ! |
| ! A2  | A(2,1,20)  | 105.0195 | -DE/DX = 0.0 | ! |
| ! A3  | A(2,1,22)  | 104.7619 | -DE/DX = 0.0 | ! |
| ! A4  | A(3,1,20)  | 105.9491 | -DE/DX = 0.0 | ! |
| ! A5  | A(3,1,22)  | 109.4774 | -DE/DX = 0.0 | ! |
| ! A6  | A(20,1,22) | 116.6212 | -DE/DX = 0.0 | ! |
| ! A7  | A(1,2,7)   | 122.6012 | -DE/DX = 0.0 | ! |
| ! A8  | A(1,2,34)  | 118.5112 | -DE/DX = 0.0 | ! |
| ! A9  | A(7,2,34)  | 118.6899 | -DE/DX = 0.0 | ! |
| ! A10 | A(1,3,4)   | 117.4703 | -DE/DX = 0.0 | ! |
| ! A11 | A(1,3,40)  | 120.4781 | -DE/DX = 0.0 | ! |
| ! A12 | A(1,3,59)  | 113.274  | -DE/DX = 0.0 | ! |
| ! A13 | A(4,3,40)  | 119.7605 | -DE/DX = 0.0 | ! |
| ! A14 | A(4,3,59)  | 110.7288 | -DE/DX = 0.0 | ! |
| ! A15 | A(3,4,5)   | 108.446  | -DE/DX = 0.0 | ! |
| ! A16 | A(3,4,12)  | 116.8336 | -DE/DX = 0.0 | ! |
| ! A17 | A(3,4,36)  | 107.2213 | -DE/DX = 0.0 | ! |
| ! A18 | A(5,4,12)  | 111.031  | -DE/DX = 0.0 | ! |
| ! A19 | A(5,4,36)  | 108.089  | -DE/DX = 0.0 | ! |
| ! A20 | A(12,4,36) | 104.7988 | -DE/DX = 0.0 | ! |
| ! A21 | A(4,5,6)   | 122.2181 | -DE/DX = 0.0 | ! |
| ! A22 | A(4,5,46)  | 126.1315 | -DE/DX = 0.0 | ! |
| ! A23 | A(4,5,61)  | 114.0173 | -DE/DX = 0.0 | ! |
| ! A24 | A(6,5,46)  | 108.2513 | -DE/DX = 0.0 | ! |
| ! A25 | A(6,5,61)  | 109.6935 | -DE/DX = 0.0 | ! |
| ! A26 | A(5,6,26)  | 107.1359 | -DE/DX = 0.0 | ! |
| ! A27 | A(5,6,42)  | 114.5313 | -DE/DX = 0.0 | ! |
| ! A28 | A(5,6,51)  | 101.8916 | -DE/DX = 0.0 | ! |
| ! A29 | A(26,6,42) | 109.1443 | -DE/DX = 0.0 | ! |
| ! A30 | A(26,6,51) | 113.9406 | -DE/DX = 0.0 | ! |
| ! A31 | A(42,6,51) | 110.1443 | -DE/DX = 0.0 | ! |
| ! A32 | A(16,8,20) | 117.3986 | -DE/DX = 0.0 | ! |
| ! A33 | A(16,8,29) | 108.527  | -DE/DX = 0.0 | ! |
| ! A34 | A(16,8,32) | 109.619  | -DE/DX = 0.0 | ! |
| ! A35 | A(20,8,29) | 96.4146  | -DE/DX = 0.0 | ! |
| ! A36 | A(20,8,32) | 106.432  | -DE/DX = 0.0 | ! |
| ! A37 | A(29,8,32) | 118.3462 | -DE/DX = 0.0 | ! |
| ! A38 | A(10,9,11) | 108.3478 | -DE/DX = 0.0 | ! |
| ! A39 | A(10,9,12) | 109.3648 | -DE/DX = 0.0 | ! |
| ! A40 | A(10,9,20) | 113.6017 | -DE/DX = 0.0 | ! |
| ! A41 | A(11,9,12) | 113.1493 | -DE/DX = 0.0 | ! |
| ! A42 | A(11,9,20) | 103.8971 | -DE/DX = 0.0 | ! |
| ! A43 | A(12,9,20) | 108.4814 | -DE/DX = 0.0 | ! |

|       |             |          |              |   |
|-------|-------------|----------|--------------|---|
| ! A44 | A(9,11,29)  | 109.819  | -DE/DX = 0.0 | ! |
| ! A45 | A(4,12,9)   | 109.811  | -DE/DX = 0.0 | ! |
| ! A46 | A(4,12,13)  | 107.1958 | -DE/DX = 0.0 | ! |
| ! A47 | A(4,12,60)  | 111.3257 | -DE/DX = 0.0 | ! |
| ! A48 | A(9,12,13)  | 110.5701 | -DE/DX = 0.0 | ! |
| ! A49 | A(9,12,60)  | 108.4512 | -DE/DX = 0.0 | ! |
| ! A50 | A(13,12,60) | 109.4933 | -DE/DX = 0.0 | ! |
| ! A51 | A(51,14,53) | 126.2986 | -DE/DX = 0.0 | ! |
| ! A52 | A(51,14,57) | 128.7371 | -DE/DX = 0.0 | ! |
| ! A53 | A(53,14,57) | 104.9597 | -DE/DX = 0.0 | ! |
| ! A54 | A(55,15,57) | 106.8133 | -DE/DX = 0.0 | ! |
| ! A55 | A(8,16,17)  | 109.2938 | -DE/DX = 0.0 | ! |
| ! A56 | A(8,16,18)  | 111.1021 | -DE/DX = 0.0 | ! |
| ! A57 | A(8,16,19)  | 112.5088 | -DE/DX = 0.0 | ! |
| ! A58 | A(17,16,18) | 107.4736 | -DE/DX = 0.0 | ! |
| ! A59 | A(17,16,19) | 107.5375 | -DE/DX = 0.0 | ! |
| ! A60 | A(18,16,19) | 108.7389 | -DE/DX = 0.0 | ! |
| ! A61 | A(1,20,8)   | 120.9914 | -DE/DX = 0.0 | ! |
| ! A62 | A(1,20,9)   | 118.6818 | -DE/DX = 0.0 | ! |
| ! A63 | A(1,20,21)  | 104.0531 | -DE/DX = 0.0 | ! |
| ! A64 | A(8,20,9)   | 104.0389 | -DE/DX = 0.0 | ! |
| ! A65 | A(8,20,21)  | 102.8796 | -DE/DX = 0.0 | ! |
| ! A66 | A(9,20,21)  | 103.7827 | -DE/DX = 0.0 | ! |
| ! A67 | A(1,22,23)  | 111.5209 | -DE/DX = 0.0 | ! |
| ! A68 | A(1,22,24)  | 112.2616 | -DE/DX = 0.0 | ! |
| ! A69 | A(1,22,25)  | 108.5112 | -DE/DX = 0.0 | ! |
| ! A70 | A(23,22,24) | 107.8623 | -DE/DX = 0.0 | ! |
| ! A71 | A(23,22,25) | 107.7517 | -DE/DX = 0.0 | ! |
| ! A72 | A(24,22,25) | 108.8058 | -DE/DX = 0.0 | ! |
| ! A73 | A(6,26,27)  | 110.3925 | -DE/DX = 0.0 | ! |
| ! A74 | A(6,26,28)  | 110.4568 | -DE/DX = 0.0 | ! |
| ! A75 | A(6,26,40)  | 111.4199 | -DE/DX = 0.0 | ! |
| ! A76 | A(27,26,28) | 107.6919 | -DE/DX = 0.0 | ! |
| ! A77 | A(27,26,40) | 109.2051 | -DE/DX = 0.0 | ! |
| ! A78 | A(28,26,40) | 107.5575 | -DE/DX = 0.0 | ! |
| ! A79 | A(8,29,11)  | 104.6712 | -DE/DX = 0.0 | ! |
| ! A80 | A(8,29,30)  | 112.0231 | -DE/DX = 0.0 | ! |
| ! A81 | A(8,29,31)  | 113.5599 | -DE/DX = 0.0 | ! |
| ! A82 | A(11,29,30) | 109.4555 | -DE/DX = 0.0 | ! |
| ! A83 | A(11,29,31) | 107.3042 | -DE/DX = 0.0 | ! |
| ! A84 | A(30,29,31) | 109.5579 | -DE/DX = 0.0 | ! |
| ! A85 | A(8,32,33)  | 119.6059 | -DE/DX = 0.0 | ! |
| ! A86 | A(8,32,34)  | 120.4312 | -DE/DX = 0.0 | ! |
| ! A87 | A(33,32,34) | 119.8398 | -DE/DX = 0.0 | ! |
| ! A88 | A(2,34,32)  | 125.5114 | -DE/DX = 0.0 | ! |
| ! A89 | A(2,34,35)  | 113.2668 | -DE/DX = 0.0 | ! |
| ! A90 | A(32,34,35) | 121.0488 | -DE/DX = 0.0 | ! |
| ! A91 | A(4,36,37)  | 110.6524 | -DE/DX = 0.0 | ! |
| ! A92 | A(4,36,38)  | 110.1988 | -DE/DX = 0.0 | ! |
| ! A93 | A(4,36,39)  | 111.5392 | -DE/DX = 0.0 | ! |
| ! A94 | A(37,36,38) | 107.9713 | -DE/DX = 0.0 | ! |
| ! A95 | A(37,36,39) | 107.8241 | -DE/DX = 0.0 | ! |

|                    |          |              |   |
|--------------------|----------|--------------|---|
| ! A96 A(38,36,39)  | 108.5417 | -DE/DX = 0.0 | ! |
| ! A97 A(3,40,26)   | 124.3541 | -DE/DX = 0.0 | ! |
| ! A98 A(3,40,41)   | 116.2163 | -DE/DX = 0.0 | ! |
| ! A99 A(26,40,41)  | 115.7399 | -DE/DX = 0.0 | ! |
| ! A100 A(26,40,59) | 115.9905 | -DE/DX = 0.0 | ! |
| ! A101 A(41,40,59) | 112.2124 | -DE/DX = 0.0 | ! |
| ! A102 A(6,42,43)  | 108.6051 | -DE/DX = 0.0 | ! |
| ! A103 A(6,42,44)  | 112.5355 | -DE/DX = 0.0 | ! |
| ! A104 A(6,42,45)  | 112.3143 | -DE/DX = 0.0 | ! |
| ! A105 A(43,42,44) | 107.8578 | -DE/DX = 0.0 | ! |
| ! A106 A(43,42,45) | 108.2575 | -DE/DX = 0.0 | ! |
| ! A107 A(44,42,45) | 107.0996 | -DE/DX = 0.0 | ! |
| ! A108 A(5,46,47)  | 123.2612 | -DE/DX = 0.0 | ! |
| ! A109 A(5,46,48)  | 109.643  | -DE/DX = 0.0 | ! |
| ! A110 A(47,46,48) | 121.3794 | -DE/DX = 0.0 | ! |
| ! A111 A(47,46,61) | 115.0785 | -DE/DX = 0.0 | ! |
| ! A112 A(48,46,61) | 111.8859 | -DE/DX = 0.0 | ! |
| ! A113 A(46,48,49) | 112.8301 | -DE/DX = 0.0 | ! |
| ! A114 A(46,48,50) | 109.4774 | -DE/DX = 0.0 | ! |
| ! A115 A(46,48,51) | 102.6915 | -DE/DX = 0.0 | ! |
| ! A116 A(49,48,50) | 107.8282 | -DE/DX = 0.0 | ! |
| ! A117 A(49,48,51) | 111.9797 | -DE/DX = 0.0 | ! |
| ! A118 A(50,48,51) | 112.0371 | -DE/DX = 0.0 | ! |
| ! A119 A(6,51,14)  | 116.3993 | -DE/DX = 0.0 | ! |
| ! A120 A(6,51,48)  | 104.3511 | -DE/DX = 0.0 | ! |
| ! A121 A(6,51,52)  | 106.1769 | -DE/DX = 0.0 | ! |
| ! A122 A(14,51,48) | 115.2757 | -DE/DX = 0.0 | ! |
| ! A123 A(14,51,52) | 107.3745 | -DE/DX = 0.0 | ! |
| ! A124 A(48,51,52) | 106.535  | -DE/DX = 0.0 | ! |
| ! A125 A(14,53,54) | 127.1029 | -DE/DX = 0.0 | ! |
| ! A126 A(14,53,55) | 106.6618 | -DE/DX = 0.0 | ! |
| ! A127 A(54,53,55) | 126.2308 | -DE/DX = 0.0 | ! |
| ! A128 A(15,55,53) | 110.4305 | -DE/DX = 0.0 | ! |
| ! A129 A(15,55,56) | 116.0171 | -DE/DX = 0.0 | ! |
| ! A130 A(53,55,56) | 133.5502 | -DE/DX = 0.0 | ! |
| ! A131 A(14,57,15) | 111.1339 | -DE/DX = 0.0 | ! |
| ! A132 A(14,57,58) | 133.4899 | -DE/DX = 0.0 | ! |
| ! A133 A(15,57,58) | 115.3757 | -DE/DX = 0.0 | ! |
| ! A134 A(12,60,62) | 121.8099 | -DE/DX = 0.0 | ! |
| ! A135 A(60,62,63) | 118.6273 | -DE/DX = 0.0 | ! |
| ! A136 A(60,62,65) | 117.6414 | -DE/DX = 0.0 | ! |
| ! A137 A(63,62,65) | 123.4069 | -DE/DX = 0.0 | ! |
| ! A138 A(62,63,64) | 116.1754 | -DE/DX = 0.0 | ! |
| ! A139 A(62,63,71) | 119.7175 | -DE/DX = 0.0 | ! |
| ! A140 A(64,63,71) | 123.9876 | -DE/DX = 0.0 | ! |
| ! A141 A(63,64,66) | 116.884  | -DE/DX = 0.0 | ! |
| ! A142 A(63,64,67) | 126.9123 | -DE/DX = 0.0 | ! |
| ! A143 A(66,64,67) | 116.1995 | -DE/DX = 0.0 | ! |
| ! A144 A(64,67,68) | 113.384  | -DE/DX = 0.0 | ! |
| ! A145 A(64,67,69) | 110.2417 | -DE/DX = 0.0 | ! |
| ! A146 A(64,67,70) | 110.3442 | -DE/DX = 0.0 | ! |
| ! A147 A(68,67,69) | 107.9748 | -DE/DX = 0.0 | ! |

|        |               |           |              |   |
|--------|---------------|-----------|--------------|---|
| ! A148 | A(68,67,70)   | 108.3647  | -DE/DX = 0.0 | ! |
| ! A149 | A(69,67,70)   | 106.2482  | -DE/DX = 0.0 | ! |
| ! A150 | A(63,71,72)   | 110.9096  | -DE/DX = 0.0 | ! |
| ! A151 | A(63,71,73)   | 112.8938  | -DE/DX = 0.0 | ! |
| ! A152 | A(63,71,74)   | 110.479   | -DE/DX = 0.0 | ! |
| ! A153 | A(72,71,73)   | 107.8382  | -DE/DX = 0.0 | ! |
| ! A154 | A(72,71,74)   | 107.3662  | -DE/DX = 0.0 | ! |
| ! A155 | A(73,71,74)   | 107.1166  | -DE/DX = 0.0 | ! |
| ! D1   | D(3,1,2,7)    | -52.1399  | -DE/DX = 0.0 | ! |
| ! D2   | D(3,1,2,34)   | 133.0409  | -DE/DX = 0.0 | ! |
| ! D3   | D(20,1,2,7)   | -168.343  | -DE/DX = 0.0 | ! |
| ! D4   | D(20,1,2,34)  | 16.8378   | -DE/DX = 0.0 | ! |
| ! D5   | D(22,1,2,7)   | 68.2573   | -DE/DX = 0.0 | ! |
| ! D6   | D(22,1,2,34)  | -106.5619 | -DE/DX = 0.0 | ! |
| ! D7   | D(2,1,3,4)    | -152.287  | -DE/DX = 0.0 | ! |
| ! D8   | D(2,1,3,40)   | 10.4851   | -DE/DX = 0.0 | ! |
| ! D9   | D(2,1,3,59)   | 76.5738   | -DE/DX = 0.0 | ! |
| ! D10  | D(20,1,3,4)   | -36.6134  | -DE/DX = 0.0 | ! |
| ! D11  | D(20,1,3,40)  | 126.1587  | -DE/DX = 0.0 | ! |
| ! D12  | D(20,1,3,59)  | -167.7526 | -DE/DX = 0.0 | ! |
| ! D13  | D(22,1,3,4)   | 89.9272   | -DE/DX = 0.0 | ! |
| ! D14  | D(22,1,3,40)  | -107.3006 | -DE/DX = 0.0 | ! |
| ! D15  | D(22,1,3,59)  | -41.2119  | -DE/DX = 0.0 | ! |
| ! D16  | D(2,1,20,8)   | -51.0631  | -DE/DX = 0.0 | ! |
| ! D17  | D(2,1,20,9)   | 178.308   | -DE/DX = 0.0 | ! |
| ! D18  | D(2,1,20,21)  | 63.6703   | -DE/DX = 0.0 | ! |
| ! D19  | D(3,1,20,8)   | -173.5387 | -DE/DX = 0.0 | ! |
| ! D20  | D(3,1,20,9)   | 55.8324   | -DE/DX = 0.0 | ! |
| ! D21  | D(3,1,20,21)  | -58.8053  | -DE/DX = 0.0 | ! |
| ! D22  | D(22,1,20,8)  | 64.3781   | -DE/DX = 0.0 | ! |
| ! D23  | D(22,1,20,9)  | -66.2508  | -DE/DX = 0.0 | ! |
| ! D24  | D(22,1,20,21) | 179.1115  | -DE/DX = 0.0 | ! |
| ! D25  | D(2,1,22,23)  | 41.1651   | -DE/DX = 0.0 | ! |
| ! D26  | D(2,1,22,24)  | 162.3426  | -DE/DX = 0.0 | ! |
| ! D27  | D(2,1,22,25)  | -77.3669  | -DE/DX = 0.0 | ! |
| ! D28  | D(3,1,22,23)  | 165.362   | -DE/DX = 0.0 | ! |
| ! D29  | D(3,1,22,24)  | -73.4605  | -DE/DX = 0.0 | ! |
| ! D30  | D(3,1,22,25)  | 46.8299   | -DE/DX = 0.0 | ! |
| ! D31  | D(20,1,22,23) | -74.4197  | -DE/DX = 0.0 | ! |
| ! D32  | D(20,1,22,24) | 46.7579   | -DE/DX = 0.0 | ! |
| ! D33  | D(20,1,22,25) | 167.0483  | -DE/DX = 0.0 | ! |
| ! D34  | D(1,2,34,32)  | 7.1404    | -DE/DX = 0.0 | ! |
| ! D35  | D(1,2,34,35)  | -177.626  | -DE/DX = 0.0 | ! |
| ! D36  | D(7,2,34,32)  | -167.8848 | -DE/DX = 0.0 | ! |
| ! D37  | D(7,2,34,35)  | 7.3488    | -DE/DX = 0.0 | ! |
| ! D38  | D(1,3,4,5)    | 160.656   | -DE/DX = 0.0 | ! |
| ! D39  | D(1,3,4,12)   | 34.3075   | -DE/DX = 0.0 | ! |
| ! D40  | D(1,3,4,36)   | -82.8529  | -DE/DX = 0.0 | ! |
| ! D41  | D(40,3,4,5)   | -2.2448   | -DE/DX = 0.0 | ! |
| ! D42  | D(40,3,4,12)  | -128.5932 | -DE/DX = 0.0 | ! |
| ! D43  | D(40,3,4,36)  | 114.2464  | -DE/DX = 0.0 | ! |
| ! D44  | D(59,3,4,5)   | -67.0511  | -DE/DX = 0.0 | ! |

|       |               |           |              |   |
|-------|---------------|-----------|--------------|---|
| ! D45 | D(59,3,4,12)  | 166.6004  | -DE/DX = 0.0 | ! |
| ! D46 | D(59,3,4,36)  | 49.44     | -DE/DX = 0.0 | ! |
| ! D47 | D(1,3,40,26)  | -158.1356 | -DE/DX = 0.0 | ! |
| ! D48 | D(1,3,40,41)  | -0.7744   | -DE/DX = 0.0 | ! |
| ! D49 | D(4,3,40,26)  | 4.2444    | -DE/DX = 0.0 | ! |
| ! D50 | D(4,3,40,41)  | 161.6055  | -DE/DX = 0.0 | ! |
| ! D51 | D(3,4,5,6)    | -31.1026  | -DE/DX = 0.0 | ! |
| ! D52 | D(3,4,5,46)   | 172.2038  | -DE/DX = 0.0 | ! |
| ! D53 | D(3,4,5,61)   | 104.6945  | -DE/DX = 0.0 | ! |
| ! D54 | D(12,4,5,6)   | 98.5443   | -DE/DX = 0.0 | ! |
| ! D55 | D(12,4,5,46)  | -58.1493  | -DE/DX = 0.0 | ! |
| ! D56 | D(12,4,5,61)  | -125.6586 | -DE/DX = 0.0 | ! |
| ! D57 | D(36,4,5,6)   | -147.0327 | -DE/DX = 0.0 | ! |
| ! D58 | D(36,4,5,46)  | 56.2737   | -DE/DX = 0.0 | ! |
| ! D59 | D(36,4,5,61)  | -11.2357  | -DE/DX = 0.0 | ! |
| ! D60 | D(3,4,12,9)   | -41.8273  | -DE/DX = 0.0 | ! |
| ! D61 | D(3,4,12,13)  | -161.9872 | -DE/DX = 0.0 | ! |
| ! D62 | D(3,4,12,60)  | 78.29     | -DE/DX = 0.0 | ! |
| ! D63 | D(5,4,12,9)   | -166.885  | -DE/DX = 0.0 | ! |
| ! D64 | D(5,4,12,13)  | 72.9551   | -DE/DX = 0.0 | ! |
| ! D65 | D(5,4,12,60)  | -46.7677  | -DE/DX = 0.0 | ! |
| ! D66 | D(36,4,12,9)  | 76.6506   | -DE/DX = 0.0 | ! |
| ! D67 | D(36,4,12,13) | -43.5093  | -DE/DX = 0.0 | ! |
| ! D68 | D(36,4,12,60) | -163.2322 | -DE/DX = 0.0 | ! |
| ! D69 | D(3,4,36,37)  | -171.7666 | -DE/DX = 0.0 | ! |
| ! D70 | D(3,4,36,38)  | -52.4256  | -DE/DX = 0.0 | ! |
| ! D71 | D(3,4,36,39)  | 68.2038   | -DE/DX = 0.0 | ! |
| ! D72 | D(5,4,36,37)  | -55.0403  | -DE/DX = 0.0 | ! |
| ! D73 | D(5,4,36,38)  | 64.3008   | -DE/DX = 0.0 | ! |
| ! D74 | D(5,4,36,39)  | -175.0698 | -DE/DX = 0.0 | ! |
| ! D75 | D(12,4,36,37) | 63.435    | -DE/DX = 0.0 | ! |
| ! D76 | D(12,4,36,38) | -177.2239 | -DE/DX = 0.0 | ! |
| ! D77 | D(12,4,36,39) | -56.5945  | -DE/DX = 0.0 | ! |
| ! D78 | D(4,5,6,26)   | 60.0752   | -DE/DX = 0.0 | ! |
| ! D79 | D(4,5,6,42)   | -61.1197  | -DE/DX = 0.0 | ! |
| ! D80 | D(4,5,6,51)   | -179.9989 | -DE/DX = 0.0 | ! |
| ! D81 | D(46,5,6,26)  | -139.5873 | -DE/DX = 0.0 | ! |
| ! D82 | D(46,5,6,42)  | 99.2179   | -DE/DX = 0.0 | ! |
| ! D83 | D(46,5,6,51)  | -19.6614  | -DE/DX = 0.0 | ! |
| ! D84 | D(61,5,6,26)  | -77.3616  | -DE/DX = 0.0 | ! |
| ! D85 | D(61,5,6,42)  | 161.4436  | -DE/DX = 0.0 | ! |
| ! D86 | D(61,5,6,51)  | 42.5644   | -DE/DX = 0.0 | ! |
| ! D87 | D(4,5,46,47)  | 3.648     | -DE/DX = 0.0 | ! |
| ! D88 | D(4,5,46,48)  | 157.1961  | -DE/DX = 0.0 | ! |
| ! D89 | D(6,5,46,47)  | -155.7142 | -DE/DX = 0.0 | ! |
| ! D90 | D(6,5,46,48)  | -2.1661   | -DE/DX = 0.0 | ! |
| ! D91 | D(5,6,26,27)  | -172.9046 | -DE/DX = 0.0 | ! |
| ! D92 | D(5,6,26,28)  | 68.1018   | -DE/DX = 0.0 | ! |
| ! D93 | D(5,6,26,40)  | -51.383   | -DE/DX = 0.0 | ! |
| ! D94 | D(42,6,26,27) | -48.367   | -DE/DX = 0.0 | ! |
| ! D95 | D(42,6,26,28) | -167.3606 | -DE/DX = 0.0 | ! |
| ! D96 | D(42,6,26,40) | 73.1546   | -DE/DX = 0.0 | ! |

|        |               |           |              |   |
|--------|---------------|-----------|--------------|---|
| ! D97  | D(51,6,26,27) | 75.2055   | -DE/DX = 0.0 | ! |
| ! D98  | D(51,6,26,28) | -43.788   | -DE/DX = 0.0 | ! |
| ! D99  | D(51,6,26,40) | -163.2729 | -DE/DX = 0.0 | ! |
| ! D100 | D(5,6,42,43)  | -178.6306 | -DE/DX = 0.0 | ! |
| ! D101 | D(5,6,42,44)  | -59.2902  | -DE/DX = 0.0 | ! |
| ! D102 | D(5,6,42,45)  | 61.6678   | -DE/DX = 0.0 | ! |
| ! D103 | D(26,6,42,43) | 61.2856   | -DE/DX = 0.0 | ! |
| ! D104 | D(26,6,42,44) | -179.374  | -DE/DX = 0.0 | ! |
| ! D105 | D(26,6,42,45) | -58.4161  | -DE/DX = 0.0 | ! |
| ! D106 | D(51,6,42,43) | -64.5087  | -DE/DX = 0.0 | ! |
| ! D107 | D(51,6,42,44) | 54.8317   | -DE/DX = 0.0 | ! |
| ! D108 | D(51,6,42,45) | 175.7897  | -DE/DX = 0.0 | ! |
| ! D109 | D(5,6,51,14)  | 162.1009  | -DE/DX = 0.0 | ! |
| ! D110 | D(5,6,51,48)  | 33.855    | -DE/DX = 0.0 | ! |
| ! D111 | D(5,6,51,52)  | -78.4847  | -DE/DX = 0.0 | ! |
| ! D112 | D(26,6,51,14) | -82.8788  | -DE/DX = 0.0 | ! |
| ! D113 | D(26,6,51,48) | 148.8753  | -DE/DX = 0.0 | ! |
| ! D114 | D(26,6,51,52) | 36.5356   | -DE/DX = 0.0 | ! |
| ! D115 | D(42,6,51,14) | 40.1503   | -DE/DX = 0.0 | ! |
| ! D116 | D(42,6,51,48) | -88.0956  | -DE/DX = 0.0 | ! |
| ! D117 | D(42,6,51,52) | 159.5647  | -DE/DX = 0.0 | ! |
| ! D118 | D(20,8,16,17) | -173.769  | -DE/DX = 0.0 | ! |
| ! D119 | D(20,8,16,18) | -55.3381  | -DE/DX = 0.0 | ! |
| ! D120 | D(20,8,16,19) | 66.8474   | -DE/DX = 0.0 | ! |
| ! D121 | D(29,8,16,17) | -65.9257  | -DE/DX = 0.0 | ! |
| ! D122 | D(29,8,16,18) | 52.5051   | -DE/DX = 0.0 | ! |
| ! D123 | D(29,8,16,19) | 174.6907  | -DE/DX = 0.0 | ! |
| ! D124 | D(32,8,16,17) | 64.6965   | -DE/DX = 0.0 | ! |
| ! D125 | D(32,8,16,18) | -176.8727 | -DE/DX = 0.0 | ! |
| ! D126 | D(32,8,16,19) | -54.6872  | -DE/DX = 0.0 | ! |
| ! D127 | D(16,8,20,1)  | -66.2059  | -DE/DX = 0.0 | ! |
| ! D128 | D(16,8,20,9)  | 70.4547   | -DE/DX = 0.0 | ! |
| ! D129 | D(16,8,20,21) | 178.459   | -DE/DX = 0.0 | ! |
| ! D130 | D(29,8,20,1)  | 179.0589  | -DE/DX = 0.0 | ! |
| ! D131 | D(29,8,20,9)  | -44.2806  | -DE/DX = 0.0 | ! |
| ! D132 | D(29,8,20,21) | 63.7238   | -DE/DX = 0.0 | ! |
| ! D133 | D(32,8,20,1)  | 56.9661   | -DE/DX = 0.0 | ! |
| ! D134 | D(32,8,20,9)  | -166.3733 | -DE/DX = 0.0 | ! |
| ! D135 | D(32,8,20,21) | -58.369   | -DE/DX = 0.0 | ! |
| ! D136 | D(16,8,29,11) | -81.6974  | -DE/DX = 0.0 | ! |
| ! D137 | D(16,8,29,30) | 159.7934  | -DE/DX = 0.0 | ! |
| ! D138 | D(16,8,29,31) | 35.0202   | -DE/DX = 0.0 | ! |
| ! D139 | D(20,8,29,11) | 40.0424   | -DE/DX = 0.0 | ! |
| ! D140 | D(20,8,29,30) | -78.4667  | -DE/DX = 0.0 | ! |
| ! D141 | D(20,8,29,31) | 156.7601  | -DE/DX = 0.0 | ! |
| ! D142 | D(32,8,29,11) | 152.6299  | -DE/DX = 0.0 | ! |
| ! D143 | D(32,8,29,30) | 34.1207   | -DE/DX = 0.0 | ! |
| ! D144 | D(32,8,29,31) | -90.6525  | -DE/DX = 0.0 | ! |
| ! D145 | D(16,8,32,33) | -74.3947  | -DE/DX = 0.0 | ! |
| ! D146 | D(16,8,32,34) | 101.566   | -DE/DX = 0.0 | ! |
| ! D147 | D(20,8,32,33) | 157.6919  | -DE/DX = 0.0 | ! |
| ! D148 | D(20,8,32,34) | -26.3474  | -DE/DX = 0.0 | ! |

|        |                |           |              |   |
|--------|----------------|-----------|--------------|---|
| ! D149 | D(29,8,32,33)  | 50.7468   | -DE/DX = 0.0 | ! |
| ! D150 | D(29,8,32,34)  | -133.2925 | -DE/DX = 0.0 | ! |
| ! D151 | D(10,9,11,29)  | 114.3675  | -DE/DX = 0.0 | ! |
| ! D152 | D(12,9,11,29)  | -124.1843 | -DE/DX = 0.0 | ! |
| ! D153 | D(20,9,11,29)  | -6.7367   | -DE/DX = 0.0 | ! |
| ! D154 | D(10,9,12,4)   | -69.7594  | -DE/DX = 0.0 | ! |
| ! D155 | D(10,9,12,13)  | 48.3285   | -DE/DX = 0.0 | ! |
| ! D156 | D(10,9,12,60)  | 168.3913  | -DE/DX = 0.0 | ! |
| ! D157 | D(11,9,12,4)   | 169.3668  | -DE/DX = 0.0 | ! |
| ! D158 | D(11,9,12,13)  | -72.5453  | -DE/DX = 0.0 | ! |
| ! D159 | D(11,9,12,60)  | 47.5175   | -DE/DX = 0.0 | ! |
| ! D160 | D(20,9,12,4)   | 54.6383   | -DE/DX = 0.0 | ! |
| ! D161 | D(20,9,12,13)  | 172.7262  | -DE/DX = 0.0 | ! |
| ! D162 | D(20,9,12,60)  | -67.211   | -DE/DX = 0.0 | ! |
| ! D163 | D(10,9,20,1)   | 53.7167   | -DE/DX = 0.0 | ! |
| ! D164 | D(10,9,20,8)   | -84.1675  | -DE/DX = 0.0 | ! |
| ! D165 | D(10,9,20,21)  | 168.5     | -DE/DX = 0.0 | ! |
| ! D166 | D(11,9,20,1)   | 171.2318  | -DE/DX = 0.0 | ! |
| ! D167 | D(11,9,20,8)   | 33.3476   | -DE/DX = 0.0 | ! |
| ! D168 | D(11,9,20,21)  | -73.9849  | -DE/DX = 0.0 | ! |
| ! D169 | D(12,9,20,1)   | -68.1242  | -DE/DX = 0.0 | ! |
| ! D170 | D(12,9,20,8)   | 153.9916  | -DE/DX = 0.0 | ! |
| ! D171 | D(12,9,20,21)  | 46.6591   | -DE/DX = 0.0 | ! |
| ! D172 | D(9,11,29,8)   | -22.1046  | -DE/DX = 0.0 | ! |
| ! D173 | D(9,11,29,30)  | 98.1321   | -DE/DX = 0.0 | ! |
| ! D174 | D(9,11,29,31)  | -143.0574 | -DE/DX = 0.0 | ! |
| ! D175 | D(4,12,60,62)  | 170.8473  | -DE/DX = 0.0 | ! |
| ! D176 | D(9,12,60,62)  | -68.2352  | -DE/DX = 0.0 | ! |
| ! D177 | D(13,12,60,62) | 52.4968   | -DE/DX = 0.0 | ! |
| ! D178 | D(53,14,51,6)  | 76.9234   | -DE/DX = 0.0 | ! |
| ! D179 | D(53,14,51,48) | -160.3657 | -DE/DX = 0.0 | ! |
| ! D180 | D(53,14,51,52) | -41.8421  | -DE/DX = 0.0 | ! |
| ! D181 | D(57,14,51,6)  | -103.9733 | -DE/DX = 0.0 | ! |
| ! D182 | D(57,14,51,48) | 18.7377   | -DE/DX = 0.0 | ! |
| ! D183 | D(57,14,51,52) | 137.2612  | -DE/DX = 0.0 | ! |
| ! D184 | D(51,14,53,54) | 0.286     | -DE/DX = 0.0 | ! |
| ! D185 | D(51,14,53,55) | 179.5522  | -DE/DX = 0.0 | ! |
| ! D186 | D(57,14,53,54) | -178.9901 | -DE/DX = 0.0 | ! |
| ! D187 | D(57,14,53,55) | 0.2761    | -DE/DX = 0.0 | ! |
| ! D188 | D(51,14,57,15) | -179.4681 | -DE/DX = 0.0 | ! |
| ! D189 | D(51,14,57,58) | 0.2747    | -DE/DX = 0.0 | ! |
| ! D190 | D(53,14,57,15) | -0.216    | -DE/DX = 0.0 | ! |
| ! D191 | D(53,14,57,58) | 179.5268  | -DE/DX = 0.0 | ! |
| ! D192 | D(57,15,55,53) | 0.1139    | -DE/DX = 0.0 | ! |
| ! D193 | D(57,15,55,56) | 179.6478  | -DE/DX = 0.0 | ! |
| ! D194 | D(55,15,57,14) | 0.0735    | -DE/DX = 0.0 | ! |
| ! D195 | D(55,15,57,58) | -179.72   | -DE/DX = 0.0 | ! |
| ! D196 | D(6,26,40,3)   | 24.8161   | -DE/DX = 0.0 | ! |
| ! D197 | D(6,26,40,41)  | -132.6417 | -DE/DX = 0.0 | ! |
| ! D198 | D(6,26,40,59)  | 92.7744   | -DE/DX = 0.0 | ! |
| ! D199 | D(27,26,40,3)  | 147.0253  | -DE/DX = 0.0 | ! |
| ! D200 | D(27,26,40,41) | -10.4324  | -DE/DX = 0.0 | ! |

|        |                |           |              |   |
|--------|----------------|-----------|--------------|---|
| ! D201 | D(27,26,40,59) | -145.0163 | -DE/DX = 0.0 | ! |
| ! D202 | D(28,26,40,3)  | -96.3755  | -DE/DX = 0.0 | ! |
| ! D203 | D(28,26,40,41) | 106.1668  | -DE/DX = 0.0 | ! |
| ! D204 | D(28,26,40,59) | -28.4172  | -DE/DX = 0.0 | ! |
| ! D205 | D(8,32,34,2)   | -1.6292   | -DE/DX = 0.0 | ! |
| ! D206 | D(8,32,34,35)  | -176.5172 | -DE/DX = 0.0 | ! |
| ! D207 | D(33,32,34,2)  | 174.322   | -DE/DX = 0.0 | ! |
| ! D208 | D(33,32,34,35) | -0.566    | -DE/DX = 0.0 | ! |
| ! D209 | D(5,46,48,49)  | 144.3189  | -DE/DX = 0.0 | ! |
| ! D210 | D(5,46,48,50)  | -95.5989  | -DE/DX = 0.0 | ! |
| ! D211 | D(5,46,48,51)  | 23.5839   | -DE/DX = 0.0 | ! |
| ! D212 | D(47,46,48,49) | -61.5482  | -DE/DX = 0.0 | ! |
| ! D213 | D(47,46,48,50) | 58.534    | -DE/DX = 0.0 | ! |
| ! D214 | D(47,46,48,51) | 177.7168  | -DE/DX = 0.0 | ! |
| ! D215 | D(61,46,48,49) | 79.7163   | -DE/DX = 0.0 | ! |
| ! D216 | D(61,46,48,50) | -160.2016 | -DE/DX = 0.0 | ! |
| ! D217 | D(61,46,48,51) | -41.0187  | -DE/DX = 0.0 | ! |
| ! D218 | D(46,48,51,6)  | -35.3362  | -DE/DX = 0.0 | ! |
| ! D219 | D(46,48,51,14) | -164.264  | -DE/DX = 0.0 | ! |
| ! D220 | D(46,48,51,52) | 76.7461   | -DE/DX = 0.0 | ! |
| ! D221 | D(49,48,51,6)  | -156.6541 | -DE/DX = 0.0 | ! |
| ! D222 | D(49,48,51,14) | 74.4181   | -DE/DX = 0.0 | ! |
| ! D223 | D(49,48,51,52) | -44.5718  | -DE/DX = 0.0 | ! |
| ! D224 | D(50,48,51,6)  | 82.0433   | -DE/DX = 0.0 | ! |
| ! D225 | D(50,48,51,14) | -46.8845  | -DE/DX = 0.0 | ! |
| ! D226 | D(50,48,51,52) | -165.8744 | -DE/DX = 0.0 | ! |
| ! D227 | D(14,53,55,15) | -0.2444   | -DE/DX = 0.0 | ! |
| ! D228 | D(14,53,55,56) | -179.6665 | -DE/DX = 0.0 | ! |
| ! D229 | D(54,53,55,15) | 179.03    | -DE/DX = 0.0 | ! |
| ! D230 | D(54,53,55,56) | -0.3921   | -DE/DX = 0.0 | ! |
| ! D231 | D(12,60,62,63) | -47.9376  | -DE/DX = 0.0 | ! |
| ! D232 | D(12,60,62,65) | 138.3764  | -DE/DX = 0.0 | ! |
| ! D233 | D(60,62,63,64) | 148.8655  | -DE/DX = 0.0 | ! |
| ! D234 | D(60,62,63,71) | -34.9505  | -DE/DX = 0.0 | ! |
| ! D235 | D(65,62,63,64) | -37.8366  | -DE/DX = 0.0 | ! |
| ! D236 | D(65,62,63,71) | 138.3474  | -DE/DX = 0.0 | ! |
| ! D237 | D(62,63,64,66) | -1.8572   | -DE/DX = 0.0 | ! |
| ! D238 | D(62,63,64,67) | 178.9249  | -DE/DX = 0.0 | ! |
| ! D239 | D(71,63,64,66) | -177.86   | -DE/DX = 0.0 | ! |
| ! D240 | D(71,63,64,67) | 2.9222    | -DE/DX = 0.0 | ! |
| ! D241 | D(62,63,71,72) | -15.2702  | -DE/DX = 0.0 | ! |
| ! D242 | D(62,63,71,73) | 105.8814  | -DE/DX = 0.0 | ! |
| ! D243 | D(62,63,71,74) | -134.2014 | -DE/DX = 0.0 | ! |
| ! D244 | D(64,63,71,72) | 160.5991  | -DE/DX = 0.0 | ! |
| ! D245 | D(64,63,71,73) | -78.2493  | -DE/DX = 0.0 | ! |
| ! D246 | D(64,63,71,74) | 41.6678   | -DE/DX = 0.0 | ! |
| ! D247 | D(63,64,67,68) | -2.3627   | -DE/DX = 0.0 | ! |
| ! D248 | D(63,64,67,69) | 118.8218  | -DE/DX = 0.0 | ! |
| ! D249 | D(63,64,67,70) | -124.1271 | -DE/DX = 0.0 | ! |
| ! D250 | D(66,64,67,68) | 178.4147  | -DE/DX = 0.0 | ! |
| ! D251 | D(66,64,67,69) | -60.4007  | -DE/DX = 0.0 | ! |
| ! D252 | D(66,64,67,70) | 56.6504   | -DE/DX = 0.0 | ! |



**6. opt=tight b3pw91/6-311++g(d,p) scrf=(cpcm,solvent=chloroform) nosymm**

| -----                       |            |        |                  |   |
|-----------------------------|------------|--------|------------------|---|
| ! Optimized Parameters !    |            |        |                  |   |
| ! (Angstroms and Degrees) ! |            |        |                  |   |
| -----                       |            |        |                  |   |
| ! Name                      | Definition | Value  | Derivative Info. | ! |
| -----                       |            |        |                  |   |
| ! R1                        | R(1,2)     | 1.55   | -DE/DX = 0.0     | ! |
| ! R2                        | R(1,3)     | 1.5684 | -DE/DX = 0.0     | ! |
| ! R3                        | R(1,20)    | 1.5147 | -DE/DX = 0.0     | ! |
| ! R4                        | R(1,22)    | 1.5438 | -DE/DX = 0.0     | ! |
| ! R5                        | R(2,7)     | 1.2197 | -DE/DX = 0.0     | ! |
| ! R6                        | R(2,34)    | 1.4867 | -DE/DX = 0.0     | ! |
| ! R7                        | R(3,4)     | 1.586  | -DE/DX = 0.0     | ! |
| ! R8                        | R(3,40)    | 1.4918 | -DE/DX = 0.0     | ! |
| ! R9                        | R(3,59)    | 1.4256 | -DE/DX = 0.0     | ! |
| ! R10                       | R(4,5)     | 1.5471 | -DE/DX = 0.0     | ! |
| ! R11                       | R(4,12)    | 1.5707 | -DE/DX = 0.0     | ! |
| ! R12                       | R(4,36)    | 1.5472 | -DE/DX = 0.0     | ! |
| ! R13                       | R(5,6)     | 1.541  | -DE/DX = 0.0     | ! |
| ! R14                       | R(5,46)    | 1.4684 | -DE/DX = 0.0     | ! |
| ! R15                       | R(5,61)    | 1.4492 | -DE/DX = 0.0     | ! |
| ! R16                       | R(6,26)    | 1.5248 | -DE/DX = 0.0     | ! |
| ! R17                       | R(6,42)    | 1.5298 | -DE/DX = 0.0     | ! |
| ! R18                       | R(6,51)    | 1.5728 | -DE/DX = 0.0     | ! |
| ! R19                       | R(8,16)    | 1.5408 | -DE/DX = 0.0     | ! |
| ! R20                       | R(8,20)    | 1.5264 | -DE/DX = 0.0     | ! |
| ! R21                       | R(8,29)    | 1.5406 | -DE/DX = 0.0     | ! |
| ! R22                       | R(8,32)    | 1.496  | -DE/DX = 0.0     | ! |
| ! R23                       | R(9,10)    | 1.0945 | -DE/DX = 0.0     | ! |
| ! R24                       | R(9,11)    | 1.4324 | -DE/DX = 0.0     | ! |
| ! R25                       | R(9,12)    | 1.5329 | -DE/DX = 0.0     | ! |
| ! R26                       | R(9,20)    | 1.4998 | -DE/DX = 0.0     | ! |
| ! R27                       | R(11,29)   | 1.4457 | -DE/DX = 0.0     | ! |
| ! R28                       | R(12,13)   | 1.092  | -DE/DX = 0.0     | ! |
| ! R29                       | R(12,60)   | 1.4283 | -DE/DX = 0.0     | ! |
| ! R30                       | R(14,51)   | 1.4959 | -DE/DX = 0.0     | ! |
| ! R31                       | R(14,53)   | 1.4397 | -DE/DX = 0.0     | ! |
| ! R32                       | R(14,57)   | 1.3614 | -DE/DX = 0.0     | ! |
| ! R33                       | R(15,55)   | 1.3574 | -DE/DX = 0.0     | ! |
| ! R34                       | R(15,57)   | 1.3616 | -DE/DX = 0.0     | ! |
| ! R35                       | R(16,17)   | 1.094  | -DE/DX = 0.0     | ! |
| ! R36                       | R(16,18)   | 1.0931 | -DE/DX = 0.0     | ! |
| ! R37                       | R(16,19)   | 1.0894 | -DE/DX = 0.0     | ! |
| ! R38                       | R(20,21)   | 1.1006 | -DE/DX = 0.0     | ! |
| ! R39                       | R(22,23)   | 1.0911 | -DE/DX = 0.0     | ! |
| ! R40                       | R(22,24)   | 1.0906 | -DE/DX = 0.0     | ! |
| ! R41                       | R(22,25)   | 1.0906 | -DE/DX = 0.0     | ! |
| ! R42                       | R(26,27)   | 1.094  | -DE/DX = 0.0     | ! |

|       |            |          |              |   |
|-------|------------|----------|--------------|---|
| ! R43 | R(26,28)   | 1.0952   | -DE/DX = 0.0 | ! |
| ! R44 | R(26,40)   | 1.5129   | -DE/DX = 0.0 | ! |
| ! R45 | R(29,30)   | 1.0963   | -DE/DX = 0.0 | ! |
| ! R46 | R(29,31)   | 1.0917   | -DE/DX = 0.0 | ! |
| ! R47 | R(32,33)   | 1.0884   | -DE/DX = 0.0 | ! |
| ! R48 | R(32,34)   | 1.3436   | -DE/DX = 0.0 | ! |
| ! R49 | R(34,35)   | 1.0862   | -DE/DX = 0.0 | ! |
| ! R50 | R(36,37)   | 1.0916   | -DE/DX = 0.0 | ! |
| ! R51 | R(36,38)   | 1.0874   | -DE/DX = 0.0 | ! |
| ! R52 | R(36,39)   | 1.0902   | -DE/DX = 0.0 | ! |
| ! R53 | R(40,41)   | 1.0839   | -DE/DX = 0.0 | ! |
| ! R54 | R(40,59)   | 1.432    | -DE/DX = 0.0 | ! |
| ! R55 | R(42,43)   | 1.0934   | -DE/DX = 0.0 | ! |
| ! R56 | R(42,44)   | 1.0904   | -DE/DX = 0.0 | ! |
| ! R57 | R(42,45)   | 1.0897   | -DE/DX = 0.0 | ! |
| ! R58 | R(46,47)   | 1.0861   | -DE/DX = 0.0 | ! |
| ! R59 | R(46,48)   | 1.5077   | -DE/DX = 0.0 | ! |
| ! R60 | R(46,61)   | 1.4297   | -DE/DX = 0.0 | ! |
| ! R61 | R(48,49)   | 1.0938   | -DE/DX = 0.0 | ! |
| ! R62 | R(48,50)   | 1.0954   | -DE/DX = 0.0 | ! |
| ! R63 | R(48,51)   | 1.5405   | -DE/DX = 0.0 | ! |
| ! R64 | R(51,52)   | 1.0933   | -DE/DX = 0.0 | ! |
| ! R65 | R(53,54)   | 1.08     | -DE/DX = 0.0 | ! |
| ! R66 | R(53,55)   | 1.3559   | -DE/DX = 0.0 | ! |
| ! R67 | R(55,56)   | 1.0784   | -DE/DX = 0.0 | ! |
| ! R68 | R(57,58)   | 1.0779   | -DE/DX = 0.0 | ! |
| ! R69 | R(60,62)   | 1.365    | -DE/DX = 0.0 | ! |
| ! R70 | R(62,63)   | 1.4952   | -DE/DX = 0.0 | ! |
| ! R71 | R(62,65)   | 1.2098   | -DE/DX = 0.0 | ! |
| ! R72 | R(63,64)   | 1.3398   | -DE/DX = 0.0 | ! |
| ! R73 | R(63,71)   | 1.5083   | -DE/DX = 0.0 | ! |
| ! R74 | R(64,66)   | 1.0872   | -DE/DX = 0.0 | ! |
| ! R75 | R(64,67)   | 1.4901   | -DE/DX = 0.0 | ! |
| ! R76 | R(67,68)   | 1.0907   | -DE/DX = 0.0 | ! |
| ! R77 | R(67,69)   | 1.0963   | -DE/DX = 0.0 | ! |
| ! R78 | R(67,70)   | 1.0961   | -DE/DX = 0.0 | ! |
| ! R79 | R(71,72)   | 1.0902   | -DE/DX = 0.0 | ! |
| ! R80 | R(71,73)   | 1.0954   | -DE/DX = 0.0 | ! |
| ! R81 | R(71,74)   | 1.0923   | -DE/DX = 0.0 | ! |
| ! A1  | A(2,1,3)   | 114.9661 | -DE/DX = 0.0 | ! |
| ! A2  | A(2,1,20)  | 105.4353 | -DE/DX = 0.0 | ! |
| ! A3  | A(2,1,22)  | 105.0065 | -DE/DX = 0.0 | ! |
| ! A4  | A(3,1,20)  | 105.1727 | -DE/DX = 0.0 | ! |
| ! A5  | A(3,1,22)  | 110.1062 | -DE/DX = 0.0 | ! |
| ! A6  | A(20,1,22) | 116.4196 | -DE/DX = 0.0 | ! |
| ! A7  | A(1,2,7)   | 122.0599 | -DE/DX = 0.0 | ! |
| ! A8  | A(1,2,34)  | 118.8095 | -DE/DX = 0.0 | ! |
| ! A9  | A(7,2,34)  | 118.9368 | -DE/DX = 0.0 | ! |
| ! A10 | A(1,3,4)   | 117.2908 | -DE/DX = 0.0 | ! |
| ! A11 | A(1,3,40)  | 120.3201 | -DE/DX = 0.0 | ! |
| ! A12 | A(1,3,59)  | 113.5007 | -DE/DX = 0.0 | ! |
| ! A13 | A(4,3,40)  | 119.8264 | -DE/DX = 0.0 | ! |

|       |             |          |              |   |
|-------|-------------|----------|--------------|---|
| ! A14 | A(4,3,59)   | 111.1433 | -DE/DX = 0.0 | ! |
| ! A15 | A(3,4,5)    | 108.1898 | -DE/DX = 0.0 | ! |
| ! A16 | A(3,4,12)   | 117.026  | -DE/DX = 0.0 | ! |
| ! A17 | A(3,4,36)   | 107.382  | -DE/DX = 0.0 | ! |
| ! A18 | A(5,4,12)   | 111.3284 | -DE/DX = 0.0 | ! |
| ! A19 | A(5,4,36)   | 108.3471 | -DE/DX = 0.0 | ! |
| ! A20 | A(12,4,36)  | 104.153  | -DE/DX = 0.0 | ! |
| ! A21 | A(4,5,6)    | 122.2697 | -DE/DX = 0.0 | ! |
| ! A22 | A(4,5,46)   | 126.0739 | -DE/DX = 0.0 | ! |
| ! A23 | A(4,5,61)   | 113.9553 | -DE/DX = 0.0 | ! |
| ! A24 | A(6,5,46)   | 108.29   | -DE/DX = 0.0 | ! |
| ! A25 | A(6,5,61)   | 109.5481 | -DE/DX = 0.0 | ! |
| ! A26 | A(5,6,26)   | 107.2931 | -DE/DX = 0.0 | ! |
| ! A27 | A(5,6,42)   | 114.5541 | -DE/DX = 0.0 | ! |
| ! A28 | A(5,6,51)   | 101.9777 | -DE/DX = 0.0 | ! |
| ! A29 | A(26,6,42)  | 108.9314 | -DE/DX = 0.0 | ! |
| ! A30 | A(26,6,51)  | 113.9367 | -DE/DX = 0.0 | ! |
| ! A31 | A(42,6,51)  | 110.1222 | -DE/DX = 0.0 | ! |
| ! A32 | A(16,8,20)  | 117.3974 | -DE/DX = 0.0 | ! |
| ! A33 | A(16,8,29)  | 108.6672 | -DE/DX = 0.0 | ! |
| ! A34 | A(16,8,32)  | 109.4415 | -DE/DX = 0.0 | ! |
| ! A35 | A(20,8,29)  | 96.4285  | -DE/DX = 0.0 | ! |
| ! A36 | A(20,8,32)  | 106.3732 | -DE/DX = 0.0 | ! |
| ! A37 | A(29,8,32)  | 118.4575 | -DE/DX = 0.0 | ! |
| ! A38 | A(10,9,11)  | 108.2933 | -DE/DX = 0.0 | ! |
| ! A39 | A(10,9,12)  | 109.3298 | -DE/DX = 0.0 | ! |
| ! A40 | A(10,9,20)  | 113.6397 | -DE/DX = 0.0 | ! |
| ! A41 | A(11,9,12)  | 113.1724 | -DE/DX = 0.0 | ! |
| ! A42 | A(11,9,20)  | 103.7399 | -DE/DX = 0.0 | ! |
| ! A43 | A(12,9,20)  | 108.664  | -DE/DX = 0.0 | ! |
| ! A44 | A(9,11,29)  | 109.8362 | -DE/DX = 0.0 | ! |
| ! A45 | A(4,12,9)   | 110.1418 | -DE/DX = 0.0 | ! |
| ! A46 | A(4,12,13)  | 106.9483 | -DE/DX = 0.0 | ! |
| ! A47 | A(4,12,60)  | 111.9073 | -DE/DX = 0.0 | ! |
| ! A48 | A(9,12,13)  | 110.6773 | -DE/DX = 0.0 | ! |
| ! A49 | A(9,12,60)  | 107.9972 | -DE/DX = 0.0 | ! |
| ! A50 | A(13,12,60) | 109.1839 | -DE/DX = 0.0 | ! |
| ! A51 | A(51,14,53) | 126.3771 | -DE/DX = 0.0 | ! |
| ! A52 | A(51,14,57) | 128.5448 | -DE/DX = 0.0 | ! |
| ! A53 | A(53,14,57) | 105.0728 | -DE/DX = 0.0 | ! |
| ! A54 | A(55,15,57) | 106.8678 | -DE/DX = 0.0 | ! |
| ! A55 | A(8,16,17)  | 109.185  | -DE/DX = 0.0 | ! |
| ! A56 | A(8,16,18)  | 111.126  | -DE/DX = 0.0 | ! |
| ! A57 | A(8,16,19)  | 112.439  | -DE/DX = 0.0 | ! |
| ! A58 | A(17,16,18) | 107.6381 | -DE/DX = 0.0 | ! |
| ! A59 | A(17,16,19) | 107.6018 | -DE/DX = 0.0 | ! |
| ! A60 | A(18,16,19) | 108.6775 | -DE/DX = 0.0 | ! |
| ! A61 | A(1,20,8)   | 120.8439 | -DE/DX = 0.0 | ! |
| ! A62 | A(1,20,9)   | 118.2898 | -DE/DX = 0.0 | ! |
| ! A63 | A(1,20,21)  | 104.1437 | -DE/DX = 0.0 | ! |
| ! A64 | A(8,20,9)   | 104.2216 | -DE/DX = 0.0 | ! |
| ! A65 | A(8,20,21)  | 102.9989 | -DE/DX = 0.0 | ! |

|        |             |          |              |   |
|--------|-------------|----------|--------------|---|
| ! A66  | A(9,20,21)  | 104.0705 | -DE/DX = 0.0 | ! |
| ! A67  | A(1,22,23)  | 111.4305 | -DE/DX = 0.0 | ! |
| ! A68  | A(1,22,24)  | 112.3866 | -DE/DX = 0.0 | ! |
| ! A69  | A(1,22,25)  | 108.909  | -DE/DX = 0.0 | ! |
| ! A70  | A(23,22,24) | 107.6008 | -DE/DX = 0.0 | ! |
| ! A71  | A(23,22,25) | 107.625  | -DE/DX = 0.0 | ! |
| ! A72  | A(24,22,25) | 108.7458 | -DE/DX = 0.0 | ! |
| ! A73  | A(6,26,27)  | 110.4776 | -DE/DX = 0.0 | ! |
| ! A74  | A(6,26,28)  | 110.5612 | -DE/DX = 0.0 | ! |
| ! A75  | A(6,26,40)  | 111.4969 | -DE/DX = 0.0 | ! |
| ! A76  | A(27,26,28) | 107.4002 | -DE/DX = 0.0 | ! |
| ! A77  | A(27,26,40) | 109.0884 | -DE/DX = 0.0 | ! |
| ! A78  | A(28,26,40) | 107.6844 | -DE/DX = 0.0 | ! |
| ! A79  | A(8,29,11)  | 104.6043 | -DE/DX = 0.0 | ! |
| ! A80  | A(8,29,30)  | 111.8561 | -DE/DX = 0.0 | ! |
| ! A81  | A(8,29,31)  | 113.664  | -DE/DX = 0.0 | ! |
| ! A82  | A(11,29,30) | 109.5654 | -DE/DX = 0.0 | ! |
| ! A83  | A(11,29,31) | 107.4753 | -DE/DX = 0.0 | ! |
| ! A84  | A(30,29,31) | 109.4315 | -DE/DX = 0.0 | ! |
| ! A85  | A(8,32,33)  | 119.6454 | -DE/DX = 0.0 | ! |
| ! A86  | A(8,32,34)  | 120.2925 | -DE/DX = 0.0 | ! |
| ! A87  | A(33,32,34) | 119.9151 | -DE/DX = 0.0 | ! |
| ! A88  | A(2,34,32)  | 125.1913 | -DE/DX = 0.0 | ! |
| ! A89  | A(2,34,35)  | 113.7738 | -DE/DX = 0.0 | ! |
| ! A90  | A(32,34,35) | 120.7951 | -DE/DX = 0.0 | ! |
| ! A91  | A(4,36,37)  | 110.4909 | -DE/DX = 0.0 | ! |
| ! A92  | A(4,36,38)  | 110.4816 | -DE/DX = 0.0 | ! |
| ! A93  | A(4,36,39)  | 111.5229 | -DE/DX = 0.0 | ! |
| ! A94  | A(37,36,38) | 108.1437 | -DE/DX = 0.0 | ! |
| ! A95  | A(37,36,39) | 107.5633 | -DE/DX = 0.0 | ! |
| ! A96  | A(38,36,39) | 108.5211 | -DE/DX = 0.0 | ! |
| ! A97  | A(3,40,26)  | 124.7241 | -DE/DX = 0.0 | ! |
| ! A98  | A(3,40,41)  | 116.2636 | -DE/DX = 0.0 | ! |
| ! A99  | A(26,40,41) | 115.3689 | -DE/DX = 0.0 | ! |
| ! A100 | A(26,40,59) | 115.9607 | -DE/DX = 0.0 | ! |
| ! A101 | A(41,40,59) | 112.3428 | -DE/DX = 0.0 | ! |
| ! A102 | A(6,42,43)  | 108.4621 | -DE/DX = 0.0 | ! |
| ! A103 | A(6,42,44)  | 112.4084 | -DE/DX = 0.0 | ! |
| ! A104 | A(6,42,45)  | 112.1483 | -DE/DX = 0.0 | ! |
| ! A105 | A(43,42,44) | 108.0604 | -DE/DX = 0.0 | ! |
| ! A106 | A(43,42,45) | 108.1044 | -DE/DX = 0.0 | ! |
| ! A107 | A(44,42,45) | 107.4994 | -DE/DX = 0.0 | ! |
| ! A108 | A(5,46,47)  | 123.3004 | -DE/DX = 0.0 | ! |
| ! A109 | A(5,46,48)  | 109.6699 | -DE/DX = 0.0 | ! |
| ! A110 | A(47,46,48) | 121.3626 | -DE/DX = 0.0 | ! |
| ! A111 | A(47,46,61) | 115.0468 | -DE/DX = 0.0 | ! |
| ! A112 | A(48,46,61) | 111.8641 | -DE/DX = 0.0 | ! |
| ! A113 | A(46,48,49) | 112.7003 | -DE/DX = 0.0 | ! |
| ! A114 | A(46,48,50) | 109.3216 | -DE/DX = 0.0 | ! |
| ! A115 | A(46,48,51) | 102.8703 | -DE/DX = 0.0 | ! |
| ! A116 | A(49,48,50) | 107.7497 | -DE/DX = 0.0 | ! |
| ! A117 | A(49,48,51) | 112.0831 | -DE/DX = 0.0 | ! |

|        |              |           |              |   |
|--------|--------------|-----------|--------------|---|
| ! A118 | A(50,48,51)  | 112.1217  | -DE/DX = 0.0 | ! |
| ! A119 | A(6,51,14)   | 116.3329  | -DE/DX = 0.0 | ! |
| ! A120 | A(6,51,48)   | 104.4332  | -DE/DX = 0.0 | ! |
| ! A121 | A(6,51,52)   | 106.194   | -DE/DX = 0.0 | ! |
| ! A122 | A(14,51,48)  | 115.1468  | -DE/DX = 0.0 | ! |
| ! A123 | A(14,51,52)  | 107.2279  | -DE/DX = 0.0 | ! |
| ! A124 | A(48,51,52)  | 106.8251  | -DE/DX = 0.0 | ! |
| ! A125 | A(14,53,54)  | 127.1394  | -DE/DX = 0.0 | ! |
| ! A126 | A(14,53,55)  | 106.7168  | -DE/DX = 0.0 | ! |
| ! A127 | A(54,53,55)  | 126.1409  | -DE/DX = 0.0 | ! |
| ! A128 | A(15,55,53)  | 110.3331  | -DE/DX = 0.0 | ! |
| ! A129 | A(15,55,56)  | 116.0722  | -DE/DX = 0.0 | ! |
| ! A130 | A(53,55,56)  | 133.5928  | -DE/DX = 0.0 | ! |
| ! A131 | A(14,57,15)  | 111.0086  | -DE/DX = 0.0 | ! |
| ! A132 | A(14,57,58)  | 133.5343  | -DE/DX = 0.0 | ! |
| ! A133 | A(15,57,58)  | 115.4567  | -DE/DX = 0.0 | ! |
| ! A134 | A(12,60,62)  | 121.592   | -DE/DX = 0.0 | ! |
| ! A135 | A(60,62,63)  | 119.3485  | -DE/DX = 0.0 | ! |
| ! A136 | A(60,62,65)  | 117.2568  | -DE/DX = 0.0 | ! |
| ! A137 | A(63,62,65)  | 123.1015  | -DE/DX = 0.0 | ! |
| ! A138 | A(62,63,64)  | 116.6519  | -DE/DX = 0.0 | ! |
| ! A139 | A(62,63,71)  | 119.0158  | -DE/DX = 0.0 | ! |
| ! A140 | A(64,63,71)  | 124.1815  | -DE/DX = 0.0 | ! |
| ! A141 | A(63,64,66)  | 117.2759  | -DE/DX = 0.0 | ! |
| ! A142 | A(63,64,67)  | 126.7855  | -DE/DX = 0.0 | ! |
| ! A143 | A(66,64,67)  | 115.926   | -DE/DX = 0.0 | ! |
| ! A144 | A(64,67,68)  | 113.3371  | -DE/DX = 0.0 | ! |
| ! A145 | A(64,67,69)  | 110.1895  | -DE/DX = 0.0 | ! |
| ! A146 | A(64,67,70)  | 110.2552  | -DE/DX = 0.0 | ! |
| ! A147 | A(68,67,69)  | 108.0877  | -DE/DX = 0.0 | ! |
| ! A148 | A(68,67,70)  | 108.4872  | -DE/DX = 0.0 | ! |
| ! A149 | A(69,67,70)  | 106.2069  | -DE/DX = 0.0 | ! |
| ! A150 | A(63,71,72)  | 111.1008  | -DE/DX = 0.0 | ! |
| ! A151 | A(63,71,73)  | 112.9413  | -DE/DX = 0.0 | ! |
| ! A152 | A(63,71,74)  | 110.2752  | -DE/DX = 0.0 | ! |
| ! A153 | A(72,71,73)  | 107.9503  | -DE/DX = 0.0 | ! |
| ! A154 | A(72,71,74)  | 107.2375  | -DE/DX = 0.0 | ! |
| ! A155 | A(73,71,74)  | 107.0873  | -DE/DX = 0.0 | ! |
| ! D1   | D(3,1,2,7)   | -55.9515  | -DE/DX = 0.0 | ! |
| ! D2   | D(3,1,2,34)  | 129.1634  | -DE/DX = 0.0 | ! |
| ! D3   | D(20,1,2,7)  | -171.2961 | -DE/DX = 0.0 | ! |
| ! D4   | D(20,1,2,34) | 13.8188   | -DE/DX = 0.0 | ! |
| ! D5   | D(22,1,2,7)  | 65.206    | -DE/DX = 0.0 | ! |
| ! D6   | D(22,1,2,34) | -109.6791 | -DE/DX = 0.0 | ! |
| ! D7   | D(2,1,3,4)   | -154.6058 | -DE/DX = 0.0 | ! |
| ! D8   | D(2,1,3,40)  | 7.2149    | -DE/DX = 0.0 | ! |
| ! D9   | D(2,1,3,59)  | 73.5634   | -DE/DX = 0.0 | ! |
| ! D10  | D(20,1,3,4)  | -39.1099  | -DE/DX = 0.0 | ! |
| ! D11  | D(20,1,3,40) | 122.7108  | -DE/DX = 0.0 | ! |
| ! D12  | D(20,1,3,59) | -170.9408 | -DE/DX = 0.0 | ! |
| ! D13  | D(22,1,3,4)  | 87.0615   | -DE/DX = 0.0 | ! |
| ! D14  | D(22,1,3,40) | -111.1178 | -DE/DX = 0.0 | ! |

|       |               |           |              |   |
|-------|---------------|-----------|--------------|---|
| ! D15 | D(22,1,3,59)  | -44.7694  | -DE/DX = 0.0 | ! |
| ! D16 | D(2,1,20,8)   | -49.3101  | -DE/DX = 0.0 | ! |
| ! D17 | D(2,1,20,9)   | -179.5774 | -DE/DX = 0.0 | ! |
| ! D18 | D(2,1,20,21)  | 65.566    | -DE/DX = 0.0 | ! |
| ! D19 | D(3,1,20,8)   | -171.2187 | -DE/DX = 0.0 | ! |
| ! D20 | D(3,1,20,9)   | 58.514    | -DE/DX = 0.0 | ! |
| ! D21 | D(3,1,20,21)  | -56.3426  | -DE/DX = 0.0 | ! |
| ! D22 | D(22,1,20,8)  | 66.6104   | -DE/DX = 0.0 | ! |
| ! D23 | D(22,1,20,9)  | -63.6569  | -DE/DX = 0.0 | ! |
| ! D24 | D(22,1,20,21) | -178.5136 | -DE/DX = 0.0 | ! |
| ! D25 | D(2,1,22,23)  | 39.7858   | -DE/DX = 0.0 | ! |
| ! D26 | D(2,1,22,24)  | 160.6493  | -DE/DX = 0.0 | ! |
| ! D27 | D(2,1,22,25)  | -78.7877  | -DE/DX = 0.0 | ! |
| ! D28 | D(3,1,22,23)  | 164.0823  | -DE/DX = 0.0 | ! |
| ! D29 | D(3,1,22,24)  | -75.0542  | -DE/DX = 0.0 | ! |
| ! D30 | D(3,1,22,25)  | 45.5089   | -DE/DX = 0.0 | ! |
| ! D31 | D(20,1,22,23) | -76.3735  | -DE/DX = 0.0 | ! |
| ! D32 | D(20,1,22,24) | 44.49     | -DE/DX = 0.0 | ! |
| ! D33 | D(20,1,22,25) | 165.0531  | -DE/DX = 0.0 | ! |
| ! D34 | D(1,2,34,32)  | 9.9246    | -DE/DX = 0.0 | ! |
| ! D35 | D(1,2,34,35)  | -175.692  | -DE/DX = 0.0 | ! |
| ! D36 | D(7,2,34,32)  | -165.1226 | -DE/DX = 0.0 | ! |
| ! D37 | D(7,2,34,35)  | 9.2609    | -DE/DX = 0.0 | ! |
| ! D38 | D(1,3,4,5)    | 161.476   | -DE/DX = 0.0 | ! |
| ! D39 | D(1,3,4,12)   | 34.793    | -DE/DX = 0.0 | ! |
| ! D40 | D(1,3,4,36)   | -81.7775  | -DE/DX = 0.0 | ! |
| ! D41 | D(40,3,4,5)   | -0.4383   | -DE/DX = 0.0 | ! |
| ! D42 | D(40,3,4,12)  | -127.1213 | -DE/DX = 0.0 | ! |
| ! D43 | D(40,3,4,36)  | 116.3082  | -DE/DX = 0.0 | ! |
| ! D44 | D(59,3,4,5)   | -65.6316  | -DE/DX = 0.0 | ! |
| ! D45 | D(59,3,4,12)  | 167.6854  | -DE/DX = 0.0 | ! |
| ! D46 | D(59,3,4,36)  | 51.1149   | -DE/DX = 0.0 | ! |
| ! D47 | D(1,3,40,26)  | -157.8875 | -DE/DX = 0.0 | ! |
| ! D48 | D(1,3,40,41)  | -0.4783   | -DE/DX = 0.0 | ! |
| ! D49 | D(4,3,40,26)  | 3.4738    | -DE/DX = 0.0 | ! |
| ! D50 | D(4,3,40,41)  | 160.8831  | -DE/DX = 0.0 | ! |
| ! D51 | D(3,4,5,6)    | -32.71    | -DE/DX = 0.0 | ! |
| ! D52 | D(3,4,5,46)   | 170.479   | -DE/DX = 0.0 | ! |
| ! D53 | D(3,4,5,61)   | 102.8153  | -DE/DX = 0.0 | ! |
| ! D54 | D(12,4,5,6)   | 97.2133   | -DE/DX = 0.0 | ! |
| ! D55 | D(12,4,5,46)  | -59.5978  | -DE/DX = 0.0 | ! |
| ! D56 | D(12,4,5,61)  | -127.2615 | -DE/DX = 0.0 | ! |
| ! D57 | D(36,4,5,6)   | -148.8308 | -DE/DX = 0.0 | ! |
| ! D58 | D(36,4,5,46)  | 54.3582   | -DE/DX = 0.0 | ! |
| ! D59 | D(36,4,5,61)  | -13.3055  | -DE/DX = 0.0 | ! |
| ! D60 | D(3,4,12,9)   | -39.8954  | -DE/DX = 0.0 | ! |
| ! D61 | D(3,4,12,13)  | -160.2238 | -DE/DX = 0.0 | ! |
| ! D62 | D(3,4,12,60)  | 80.2507   | -DE/DX = 0.0 | ! |
| ! D63 | D(5,4,12,9)   | -165.0208 | -DE/DX = 0.0 | ! |
| ! D64 | D(5,4,12,13)  | 74.6508   | -DE/DX = 0.0 | ! |
| ! D65 | D(5,4,12,60)  | -44.8747  | -DE/DX = 0.0 | ! |
| ! D66 | D(36,4,12,9)  | 78.4308   | -DE/DX = 0.0 | ! |

|        |               |           |              |   |
|--------|---------------|-----------|--------------|---|
| ! D67  | D(36,4,12,13) | -41.8977  | -DE/DX = 0.0 | ! |
| ! D68  | D(36,4,12,60) | -161.4231 | -DE/DX = 0.0 | ! |
| ! D69  | D(3,4,36,37)  | -169.8096 | -DE/DX = 0.0 | ! |
| ! D70  | D(3,4,36,38)  | -50.1759  | -DE/DX = 0.0 | ! |
| ! D71  | D(3,4,36,39)  | 70.6086   | -DE/DX = 0.0 | ! |
| ! D72  | D(5,4,36,37)  | -53.1664  | -DE/DX = 0.0 | ! |
| ! D73  | D(5,4,36,38)  | 66.4673   | -DE/DX = 0.0 | ! |
| ! D74  | D(5,4,36,39)  | -172.7482 | -DE/DX = 0.0 | ! |
| ! D75  | D(12,4,36,37) | 65.4416   | -DE/DX = 0.0 | ! |
| ! D76  | D(12,4,36,38) | -174.9247 | -DE/DX = 0.0 | ! |
| ! D77  | D(12,4,36,39) | -54.1402  | -DE/DX = 0.0 | ! |
| ! D78  | D(4,5,6,26)   | 60.3171   | -DE/DX = 0.0 | ! |
| ! D79  | D(4,5,6,42)   | -60.7349  | -DE/DX = 0.0 | ! |
| ! D80  | D(4,5,6,51)   | -179.6536 | -DE/DX = 0.0 | ! |
| ! D81  | D(46,5,6,26)  | -139.2675 | -DE/DX = 0.0 | ! |
| ! D82  | D(46,5,6,42)  | 99.6806   | -DE/DX = 0.0 | ! |
| ! D83  | D(46,5,6,51)  | -19.2382  | -DE/DX = 0.0 | ! |
| ! D84  | D(61,5,6,26)  | -76.8855  | -DE/DX = 0.0 | ! |
| ! D85  | D(61,5,6,42)  | 162.0625  | -DE/DX = 0.0 | ! |
| ! D86  | D(61,5,6,51)  | 43.1438   | -DE/DX = 0.0 | ! |
| ! D87  | D(4,5,46,47)  | 3.5359    | -DE/DX = 0.0 | ! |
| ! D88  | D(4,5,46,48)  | 157.1851  | -DE/DX = 0.0 | ! |
| ! D89  | D(6,5,46,47)  | -155.9363 | -DE/DX = 0.0 | ! |
| ! D90  | D(6,5,46,48)  | -2.2872   | -DE/DX = 0.0 | ! |
| ! D91  | D(5,6,26,27)  | -171.6867 | -DE/DX = 0.0 | ! |
| ! D92  | D(5,6,26,28)  | 69.5617   | -DE/DX = 0.0 | ! |
| ! D93  | D(5,6,26,40)  | -50.2025  | -DE/DX = 0.0 | ! |
| ! D94  | D(42,6,26,27) | -47.1525  | -DE/DX = 0.0 | ! |
| ! D95  | D(42,6,26,28) | -165.9041 | -DE/DX = 0.0 | ! |
| ! D96  | D(42,6,26,40) | 74.3317   | -DE/DX = 0.0 | ! |
| ! D97  | D(51,6,26,27) | 76.2264   | -DE/DX = 0.0 | ! |
| ! D98  | D(51,6,26,28) | -42.5251  | -DE/DX = 0.0 | ! |
| ! D99  | D(51,6,26,40) | -162.2894 | -DE/DX = 0.0 | ! |
| ! D100 | D(5,6,42,43)  | -178.6711 | -DE/DX = 0.0 | ! |
| ! D101 | D(5,6,42,44)  | -59.2515  | -DE/DX = 0.0 | ! |
| ! D102 | D(5,6,42,45)  | 62.0143   | -DE/DX = 0.0 | ! |
| ! D103 | D(26,6,42,43) | 61.1831   | -DE/DX = 0.0 | ! |
| ! D104 | D(26,6,42,44) | -179.3973 | -DE/DX = 0.0 | ! |
| ! D105 | D(26,6,42,45) | -58.1315  | -DE/DX = 0.0 | ! |
| ! D106 | D(51,6,42,43) | -64.442   | -DE/DX = 0.0 | ! |
| ! D107 | D(51,6,42,44) | 54.9776   | -DE/DX = 0.0 | ! |
| ! D108 | D(51,6,42,45) | 176.2434  | -DE/DX = 0.0 | ! |
| ! D109 | D(5,6,51,14)  | 161.3618  | -DE/DX = 0.0 | ! |
| ! D110 | D(5,6,51,48)  | 33.2661   | -DE/DX = 0.0 | ! |
| ! D111 | D(5,6,51,52)  | -79.4383  | -DE/DX = 0.0 | ! |
| ! D112 | D(26,6,51,14) | -83.3834  | -DE/DX = 0.0 | ! |
| ! D113 | D(26,6,51,48) | 148.5209  | -DE/DX = 0.0 | ! |
| ! D114 | D(26,6,51,52) | 35.8165   | -DE/DX = 0.0 | ! |
| ! D115 | D(42,6,51,14) | 39.3466   | -DE/DX = 0.0 | ! |
| ! D116 | D(42,6,51,48) | -88.7491  | -DE/DX = 0.0 | ! |
| ! D117 | D(42,6,51,52) | 158.5465  | -DE/DX = 0.0 | ! |
| ! D118 | D(20,8,16,17) | -173.7904 | -DE/DX = 0.0 | ! |

|        |               |           |              |   |
|--------|---------------|-----------|--------------|---|
| ! D119 | D(20,8,16,18) | -55.2108  | -DE/DX = 0.0 | ! |
| ! D120 | D(20,8,16,19) | 66.8626   | -DE/DX = 0.0 | ! |
| ! D121 | D(29,8,16,17) | -65.8388  | -DE/DX = 0.0 | ! |
| ! D122 | D(29,8,16,18) | 52.7408   | -DE/DX = 0.0 | ! |
| ! D123 | D(29,8,16,19) | 174.8141  | -DE/DX = 0.0 | ! |
| ! D124 | D(32,8,16,17) | 64.9012   | -DE/DX = 0.0 | ! |
| ! D125 | D(32,8,16,18) | -176.5192 | -DE/DX = 0.0 | ! |
| ! D126 | D(32,8,16,19) | -54.4459  | -DE/DX = 0.0 | ! |
| ! D127 | D(16,8,20,1)  | -65.5483  | -DE/DX = 0.0 | ! |
| ! D128 | D(16,8,20,9)  | 70.5722   | -DE/DX = 0.0 | ! |
| ! D129 | D(16,8,20,21) | 178.9877  | -DE/DX = 0.0 | ! |
| ! D130 | D(29,8,20,1)  | 179.5424  | -DE/DX = 0.0 | ! |
| ! D131 | D(29,8,20,9)  | -44.3372  | -DE/DX = 0.0 | ! |
| ! D132 | D(29,8,20,21) | 64.0783   | -DE/DX = 0.0 | ! |
| ! D133 | D(32,8,20,1)  | 57.3411   | -DE/DX = 0.0 | ! |
| ! D134 | D(32,8,20,9)  | -166.5384 | -DE/DX = 0.0 | ! |
| ! D135 | D(32,8,20,21) | -58.123   | -DE/DX = 0.0 | ! |
| ! D136 | D(16,8,29,11) | -81.6855  | -DE/DX = 0.0 | ! |
| ! D137 | D(16,8,29,30) | 159.8003  | -DE/DX = 0.0 | ! |
| ! D138 | D(16,8,29,31) | 35.2503   | -DE/DX = 0.0 | ! |
| ! D139 | D(20,8,29,11) | 40.1074   | -DE/DX = 0.0 | ! |
| ! D140 | D(20,8,29,30) | -78.4069  | -DE/DX = 0.0 | ! |
| ! D141 | D(20,8,29,31) | 157.0432  | -DE/DX = 0.0 | ! |
| ! D142 | D(32,8,29,11) | 152.6723  | -DE/DX = 0.0 | ! |
| ! D143 | D(32,8,29,30) | 34.1581   | -DE/DX = 0.0 | ! |
| ! D144 | D(32,8,29,31) | -90.3918  | -DE/DX = 0.0 | ! |
| ! D145 | D(16,8,32,33) | -75.498   | -DE/DX = 0.0 | ! |
| ! D146 | D(16,8,32,34) | 100.0917  | -DE/DX = 0.0 | ! |
| ! D147 | D(20,8,32,33) | 156.7449  | -DE/DX = 0.0 | ! |
| ! D148 | D(20,8,32,34) | -27.6653  | -DE/DX = 0.0 | ! |
| ! D149 | D(29,8,32,33) | 49.7686   | -DE/DX = 0.0 | ! |
| ! D150 | D(29,8,32,34) | -134.6417 | -DE/DX = 0.0 | ! |
| ! D151 | D(10,9,11,29) | 114.5235  | -DE/DX = 0.0 | ! |
| ! D152 | D(12,9,11,29) | -124.0959 | -DE/DX = 0.0 | ! |
| ! D153 | D(20,9,11,29) | -6.5142   | -DE/DX = 0.0 | ! |
| ! D154 | D(10,9,12,4)  | -71.8878  | -DE/DX = 0.0 | ! |
| ! D155 | D(10,9,12,13) | 46.1662   | -DE/DX = 0.0 | ! |
| ! D156 | D(10,9,12,60) | 165.632   | -DE/DX = 0.0 | ! |
| ! D157 | D(11,9,12,4)  | 167.3172  | -DE/DX = 0.0 | ! |
| ! D158 | D(11,9,12,13) | -74.6288  | -DE/DX = 0.0 | ! |
| ! D159 | D(11,9,12,60) | 44.8371   | -DE/DX = 0.0 | ! |
| ! D160 | D(20,9,12,4)  | 52.6543   | -DE/DX = 0.0 | ! |
| ! D161 | D(20,9,12,13) | 170.7083  | -DE/DX = 0.0 | ! |
| ! D162 | D(20,9,12,60) | -69.8258  | -DE/DX = 0.0 | ! |
| ! D163 | D(10,9,20,1)  | 53.3238   | -DE/DX = 0.0 | ! |
| ! D164 | D(10,9,20,8)  | -84.1575  | -DE/DX = 0.0 | ! |
| ! D165 | D(10,9,20,21) | 168.2201  | -DE/DX = 0.0 | ! |
| ! D166 | D(11,9,20,1)  | 170.6951  | -DE/DX = 0.0 | ! |
| ! D167 | D(11,9,20,8)  | 33.2137   | -DE/DX = 0.0 | ! |
| ! D168 | D(11,9,20,21) | -74.4087  | -DE/DX = 0.0 | ! |
| ! D169 | D(12,9,20,1)  | -68.6299  | -DE/DX = 0.0 | ! |
| ! D170 | D(12,9,20,8)  | 153.8888  | -DE/DX = 0.0 | ! |



|        |                |           |              |   |
|--------|----------------|-----------|--------------|---|
| ! D171 | D(12,9,20,21)  | 46.2664   | -DE/DX = 0.0 | ! |
| ! D172 | D(9,11,29,8)   | -22.2826  | -DE/DX = 0.0 | ! |
| ! D173 | D(9,11,29,30)  | 97.776    | -DE/DX = 0.0 | ! |
| ! D174 | D(9,11,29,31)  | -143.4053 | -DE/DX = 0.0 | ! |
| ! D175 | D(4,12,60,62)  | 165.3141  | -DE/DX = 0.0 | ! |
| ! D176 | D(9,12,60,62)  | -73.2945  | -DE/DX = 0.0 | ! |
| ! D177 | D(13,12,60,62) | 47.1118   | -DE/DX = 0.0 | ! |
| ! D178 | D(53,14,51,6)  | 75.9894   | -DE/DX = 0.0 | ! |
| ! D179 | D(53,14,51,48) | -161.3562 | -DE/DX = 0.0 | ! |
| ! D180 | D(53,14,51,52) | -42.6486  | -DE/DX = 0.0 | ! |
| ! D181 | D(57,14,51,6)  | -104.9674 | -DE/DX = 0.0 | ! |
| ! D182 | D(57,14,51,48) | 17.687    | -DE/DX = 0.0 | ! |
| ! D183 | D(57,14,51,52) | 136.3945  | -DE/DX = 0.0 | ! |
| ! D184 | D(51,14,53,54) | 0.1119    | -DE/DX = 0.0 | ! |
| ! D185 | D(51,14,53,55) | 179.5167  | -DE/DX = 0.0 | ! |
| ! D186 | D(57,14,53,54) | -179.1131 | -DE/DX = 0.0 | ! |
| ! D187 | D(57,14,53,55) | 0.2917    | -DE/DX = 0.0 | ! |
| ! D188 | D(51,14,57,15) | -179.4346 | -DE/DX = 0.0 | ! |
| ! D189 | D(51,14,57,58) | 0.3052    | -DE/DX = 0.0 | ! |
| ! D190 | D(53,14,57,15) | -0.2325   | -DE/DX = 0.0 | ! |
| ! D191 | D(53,14,57,58) | 179.5074  | -DE/DX = 0.0 | ! |
| ! D192 | D(57,15,55,53) | 0.1125    | -DE/DX = 0.0 | ! |
| ! D193 | D(57,15,55,56) | 179.6827  | -DE/DX = 0.0 | ! |
| ! D194 | D(55,15,57,14) | 0.085     | -DE/DX = 0.0 | ! |
| ! D195 | D(55,15,57,58) | -179.7061 | -DE/DX = 0.0 | ! |
| ! D196 | D(6,26,40,3)   | 24.0031   | -DE/DX = 0.0 | ! |
| ! D197 | D(6,26,40,41)  | -133.5854 | -DE/DX = 0.0 | ! |
| ! D198 | D(6,26,40,59)  | 92.0837   | -DE/DX = 0.0 | ! |
| ! D199 | D(27,26,40,3)  | 146.2906  | -DE/DX = 0.0 | ! |
| ! D200 | D(27,26,40,41) | -11.298   | -DE/DX = 0.0 | ! |
| ! D201 | D(27,26,40,59) | -145.6288 | -DE/DX = 0.0 | ! |
| ! D202 | D(28,26,40,3)  | -97.4474  | -DE/DX = 0.0 | ! |
| ! D203 | D(28,26,40,41) | 104.964   | -DE/DX = 0.0 | ! |
| ! D204 | D(28,26,40,59) | -29.3668  | -DE/DX = 0.0 | ! |
| ! D205 | D(8,32,34,2)   | -1.8958   | -DE/DX = 0.0 | ! |
| ! D206 | D(8,32,34,35)  | -175.9109 | -DE/DX = 0.0 | ! |
| ! D207 | D(33,32,34,2)  | 173.682   | -DE/DX = 0.0 | ! |
| ! D208 | D(33,32,34,35) | -0.3331   | -DE/DX = 0.0 | ! |
| ! D209 | D(5,46,48,49)  | 144.2637  | -DE/DX = 0.0 | ! |
| ! D210 | D(5,46,48,50)  | -95.9444  | -DE/DX = 0.0 | ! |
| ! D211 | D(5,46,48,51)  | 23.3598   | -DE/DX = 0.0 | ! |
| ! D212 | D(47,46,48,49) | -61.4875  | -DE/DX = 0.0 | ! |
| ! D213 | D(47,46,48,50) | 58.3044   | -DE/DX = 0.0 | ! |
| ! D214 | D(47,46,48,51) | 177.6086  | -DE/DX = 0.0 | ! |
| ! D215 | D(61,46,48,49) | 79.6635   | -DE/DX = 0.0 | ! |
| ! D216 | D(61,46,48,50) | -160.5446 | -DE/DX = 0.0 | ! |
| ! D217 | D(61,46,48,51) | -41.2403  | -DE/DX = 0.0 | ! |
| ! D218 | D(46,48,51,6)  | -34.85    | -DE/DX = 0.0 | ! |
| ! D219 | D(46,48,51,14) | -163.6658 | -DE/DX = 0.0 | ! |
| ! D220 | D(46,48,51,52) | 77.4024   | -DE/DX = 0.0 | ! |
| ! D221 | D(49,48,51,6)  | -156.1751 | -DE/DX = 0.0 | ! |
| ! D222 | D(49,48,51,14) | 75.009    | -DE/DX = 0.0 | ! |

|        |                |           |              |   |
|--------|----------------|-----------|--------------|---|
| ! D223 | D(49,48,51,52) | -43.9227  | -DE/DX = 0.0 | ! |
| ! D224 | D(50,48,51,6)  | 82.4886   | -DE/DX = 0.0 | ! |
| ! D225 | D(50,48,51,14) | -46.3273  | -DE/DX = 0.0 | ! |
| ! D226 | D(50,48,51,52) | -165.2591 | -DE/DX = 0.0 | ! |
| ! D227 | D(14,53,55,15) | -0.2529   | -DE/DX = 0.0 | ! |
| ! D228 | D(14,53,55,56) | -179.7198 | -DE/DX = 0.0 | ! |
| ! D229 | D(54,53,55,15) | 179.1596  | -DE/DX = 0.0 | ! |
| ! D230 | D(54,53,55,56) | -0.3074   | -DE/DX = 0.0 | ! |
| ! D231 | D(12,60,62,63) | -40.2659  | -DE/DX = 0.0 | ! |
| ! D232 | D(12,60,62,65) | 145.7581  | -DE/DX = 0.0 | ! |
| ! D233 | D(60,62,63,64) | 140.2804  | -DE/DX = 0.0 | ! |
| ! D234 | D(60,62,63,71) | -43.9959  | -DE/DX = 0.0 | ! |
| ! D235 | D(65,62,63,64) | -46.1138  | -DE/DX = 0.0 | ! |
| ! D236 | D(65,62,63,71) | 129.6099  | -DE/DX = 0.0 | ! |
| ! D237 | D(62,63,64,66) | -2.7304   | -DE/DX = 0.0 | ! |
| ! D238 | D(62,63,64,67) | 178.6178  | -DE/DX = 0.0 | ! |
| ! D239 | D(71,63,64,66) | -178.2095 | -DE/DX = 0.0 | ! |
| ! D240 | D(71,63,64,67) | 3.1387    | -DE/DX = 0.0 | ! |
| ! D241 | D(62,63,71,72) | -15.9666  | -DE/DX = 0.0 | ! |
| ! D242 | D(62,63,71,73) | 105.503   | -DE/DX = 0.0 | ! |
| ! D243 | D(62,63,71,74) | -134.7282 | -DE/DX = 0.0 | ! |
| ! D244 | D(64,63,71,72) | 159.4127  | -DE/DX = 0.0 | ! |
| ! D245 | D(64,63,71,73) | -79.1178  | -DE/DX = 0.0 | ! |
| ! D246 | D(64,63,71,74) | 40.6511   | -DE/DX = 0.0 | ! |
| ! D247 | D(63,64,67,68) | -2.7844   | -DE/DX = 0.0 | ! |
| ! D248 | D(63,64,67,69) | 118.4754  | -DE/DX = 0.0 | ! |
| ! D249 | D(63,64,67,70) | -124.6089 | -DE/DX = 0.0 | ! |
| ! D250 | D(66,64,67,68) | 178.548   | -DE/DX = 0.0 | ! |
| ! D251 | D(66,64,67,69) | -60.1923  | -DE/DX = 0.0 | ! |
| ! D252 | D(66,64,67,70) | 56.7234   | -DE/DX = 0.0 | ! |

-----
