# Supplementary material for: Electronic Structure, Spectroscopic (IR, Raman, UV-Vis, NMR), Optoelectronic, and NLO Properties Investigations of Rubescin E (C31H36O7) Molecule in Gas Phase and Chloroform Solution Using Ab Initio and DFT Methods
Source: Hindawi journal article supplement (doi:10.1155/2019/4246810), 2019-01-02
Supplement: f1 [file 4246810.f1.zip]

## SUPPLEMENTARY MATERIAL S2

### RUBESCIN E VIBRATIONAL PARAMETER

#### Vibrational frequencies, IR intensities and Raman activities

#### 1. freq=raman b3lyp/6-311g(d,p) nosymm geom=connectivity

Harmonic frequencies (cm<sup>-1</sup>), IR intensities (KM/Mole), Raman scattering activities (A<sup>4</sup>/AMU), depolarization ratios for plane and unpolarized incident light, reduced masses (AMU), force constants (mDyne/A), and normal coordinates:

|                | 1       | 2       | 3       |
|----------------|---------|---------|---------|
|                | A       | A       | A       |
| Frequencies -- | 20.0024 | 25.2474 | 31.5312 |
| Red. masses -- | 3.8035  | 4.5580  | 5.5102  |
| Frc consts --  | 0.0009  | 0.0017  | 0.0032  |
| IR Inten --    | 0.4638  | 0.4535  | 0.4340  |
| Raman Activ -- | 1.8092  | 2.3066  | 1.9416  |
| Depolar (P) -- | 0.7116  | 0.7450  | 0.7384  |
| Depolar (U) -- | 0.8315  | 0.8539  | 0.8495  |

  

| Atom | AN | X     | Y     | Z     | X     | Y     | Z     | X     | Y     | Z     |
|------|----|-------|-------|-------|-------|-------|-------|-------|-------|-------|
| 1    | 6  | 0.00  | 0.01  | 0.01  | 0.01  | 0.00  | -0.01 | 0.02  | -0.02 | 0.03  |
| 2    | 6  | -0.01 | -0.02 | 0.03  | 0.03  | 0.01  | -0.02 | 0.01  | -0.05 | 0.06  |
| 3    | 6  | 0.00  | 0.02  | 0.01  | 0.00  | 0.01  | -0.04 | 0.02  | -0.02 | 0.04  |
| 4    | 6  | 0.01  | 0.03  | -0.02 | 0.01  | 0.00  | -0.03 | 0.03  | -0.01 | 0.02  |
| 5    | 6  | 0.00  | 0.03  | -0.02 | 0.00  | 0.00  | -0.02 | 0.02  | -0.02 | 0.02  |
| 6    | 6  | 0.00  | 0.01  | -0.01 | -0.01 | 0.02  | -0.02 | 0.03  | -0.02 | 0.02  |
| 7    | 8  | 0.00  | -0.03 | 0.07  | 0.00  | 0.03  | -0.06 | 0.04  | -0.07 | 0.11  |
| 8    | 6  | -0.01 | -0.02 | -0.04 | 0.07  | -0.02 | 0.07  | -0.02 | -0.02 | -0.05 |
| 9    | 6  | 0.01  | 0.01  | -0.05 | 0.01  | 0.00  | 0.01  | 0.01  | 0.00  | -0.03 |
| 10   | 1  | 0.01  | 0.03  | -0.04 | -0.02 | 0.01  | 0.02  | 0.03  | 0.02  | -0.04 |
| 11   | 8  | 0.01  | 0.00  | -0.07 | 0.04  | -0.01 | 0.03  | -0.01 | -0.01 | -0.07 |
| 12   | 6  | 0.01  | 0.02  | -0.05 | 0.01  | 0.00  | -0.04 | 0.01  | -0.01 | -0.01 |
| 13   | 1  | 0.01  | 0.04  | -0.06 | -0.02 | 0.02  | -0.07 | 0.02  | 0.00  | -0.02 |
| 14   | 6  | 0.00  | -0.02 | 0.00  | -0.03 | 0.02  | 0.05  | 0.06  | 0.07  | -0.02 |
| 15   | 8  | -0.02 | -0.06 | -0.01 | -0.10 | 0.06  | 0.12  | 0.11  | 0.18  | -0.02 |
| 16   | 6  | 0.00  | 0.00  | -0.06 | 0.03  | -0.01 | 0.13  | 0.00  | 0.00  | -0.08 |
| 17   | 1  | -0.01 | -0.02 | -0.07 | 0.06  | -0.02 | 0.16  | -0.02 | -0.01 | -0.12 |
| 18   | 1  | 0.01  | 0.02  | -0.07 | 0.00  | 0.00  | 0.12  | 0.03  | 0.03  | -0.10 |
| 19   | 1  | 0.00  | 0.00  | -0.03 | 0.02  | -0.01 | 0.14  | 0.01  | 0.01  | -0.06 |
| 20   | 6  | 0.00  | 0.00  | -0.02 | 0.04  | -0.01 | 0.01  | 0.00  | -0.02 | -0.01 |
| 21   | 1  | -0.01 | -0.02 | -0.02 | 0.08  | 0.00  | -0.01 | -0.03 | -0.05 | 0.00  |
| 22   | 6  | 0.01  | 0.03  | 0.02  | -0.02 | -0.03 | 0.00  | 0.04  | 0.02  | 0.04  |
| 23   | 1  | 0.01  | 0.03  | 0.03  | -0.02 | -0.05 | 0.01  | 0.04  | 0.03  | 0.05  |
| 24   | 1  | 0.00  | 0.05  | 0.01  | -0.01 | -0.03 | 0.00  | 0.03  | 0.05  | 0.03  |
| 25   | 1  | 0.01  | 0.04  | 0.04  | -0.04 | -0.01 | -0.01 | 0.05  | 0.02  | 0.07  |
| 26   | 6  | 0.00  | 0.01  | 0.02  | 0.00  | 0.02  | -0.06 | 0.02  | -0.02 | 0.04  |
| 27   | 1  | 0.00  | -0.01 | 0.03  | 0.01  | 0.05  | -0.08 | 0.02  | -0.03 | 0.05  |
| 28   | 1  | 0.00  | 0.02  | 0.03  | -0.01 | -0.01 | -0.08 | 0.02  | 0.00  | 0.05  |

|    |   |       |       |       |       |       |       |       |       |       |
|----|---|-------|-------|-------|-------|-------|-------|-------|-------|-------|
| 29 | 6 | -0.02 | -0.02 | -0.07 | 0.09  | -0.02 | 0.06  | -0.05 | -0.03 | -0.08 |
| 30 | 1 | -0.03 | -0.04 | -0.06 | 0.13  | -0.02 | 0.03  | -0.08 | -0.05 | -0.06 |
| 31 | 1 | -0.02 | -0.03 | -0.10 | 0.09  | -0.02 | 0.10  | -0.06 | -0.02 | -0.12 |
| 32 | 6 | -0.03 | -0.04 | -0.03 | 0.12  | -0.02 | 0.08  | -0.05 | -0.04 | -0.04 |
| 33 | 1 | -0.04 | -0.05 | -0.04 | 0.16  | -0.04 | 0.11  | -0.08 | -0.05 | -0.06 |
| 34 | 6 | -0.03 | -0.04 | 0.01  | 0.10  | -0.01 | 0.04  | -0.03 | -0.06 | 0.01  |
| 35 | 1 | -0.04 | -0.06 | 0.02  | 0.13  | -0.01 | 0.04  | -0.05 | -0.08 | 0.03  |
| 36 | 6 | 0.01  | 0.07  | -0.02 | 0.01  | 0.00  | -0.03 | 0.04  | 0.02  | 0.02  |
| 37 | 1 | 0.01  | 0.08  | -0.04 | 0.03  | 0.01  | -0.03 | 0.02  | 0.02  | 0.01  |
| 38 | 1 | 0.02  | 0.07  | 0.00  | 0.01  | 0.01  | -0.03 | 0.06  | 0.01  | 0.03  |
| 39 | 1 | 0.01  | 0.07  | -0.02 | 0.01  | -0.01 | -0.04 | 0.04  | 0.05  | 0.01  |
| 40 | 6 | 0.00  | 0.01  | 0.03  | 0.00  | 0.02  | -0.06 | 0.02  | -0.02 | 0.05  |
| 41 | 1 | 0.00  | -0.01 | 0.05  | 0.00  | 0.03  | -0.06 | 0.02  | -0.03 | 0.06  |
| 42 | 6 | 0.00  | -0.02 | -0.01 | -0.04 | 0.06  | -0.01 | 0.03  | -0.04 | 0.01  |
| 43 | 1 | 0.00  | -0.03 | -0.01 | -0.06 | 0.09  | 0.00  | 0.03  | -0.06 | 0.02  |
| 44 | 1 | 0.00  | -0.02 | -0.03 | -0.03 | 0.07  | 0.03  | 0.03  | -0.04 | -0.01 |
| 45 | 1 | 0.00  | -0.02 | -0.01 | -0.05 | 0.06  | -0.04 | 0.03  | -0.05 | 0.02  |
| 46 | 6 | 0.00  | 0.04  | -0.04 | 0.01  | -0.02 | 0.02  | 0.02  | -0.04 | 0.05  |
| 47 | 1 | 0.00  | 0.05  | -0.05 | 0.01  | -0.03 | 0.03  | 0.02  | -0.06 | 0.07  |
| 48 | 6 | 0.00  | 0.02  | -0.03 | -0.01 | -0.01 | 0.05  | 0.02  | -0.03 | 0.05  |
| 49 | 1 | 0.00  | 0.03  | -0.04 | 0.00  | -0.03 | 0.07  | 0.02  | -0.05 | 0.06  |
| 50 | 1 | -0.01 | 0.01  | -0.05 | -0.03 | 0.01  | 0.06  | 0.03  | 0.00  | 0.08  |
| 51 | 6 | 0.00  | 0.01  | -0.01 | -0.01 | 0.00  | 0.02  | 0.02  | 0.00  | 0.01  |
| 52 | 1 | 0.01  | 0.02  | 0.01  | 0.01  | -0.02 | 0.01  | -0.01 | -0.02 | -0.03 |
| 53 | 6 | 0.00  | -0.04 | 0.03  | -0.02 | 0.03  | 0.02  | 0.08  | 0.10  | -0.13 |
| 54 | 1 | 0.00  | -0.03 | 0.05  | 0.01  | 0.02  | -0.03 | 0.07  | 0.08  | -0.21 |
| 55 | 6 | -0.01 | -0.06 | 0.02  | -0.06 | 0.05  | 0.07  | 0.11  | 0.17  | -0.13 |
| 56 | 1 | -0.01 | -0.08 | 0.04  | -0.07 | 0.07  | 0.07  | 0.14  | 0.22  | -0.19 |
| 57 | 6 | -0.01 | -0.04 | -0.03 | -0.08 | 0.04  | 0.11  | 0.08  | 0.12  | 0.04  |
| 58 | 1 | -0.01 | -0.04 | -0.05 | -0.10 | 0.05  | 0.15  | 0.08  | 0.11  | 0.13  |
| 59 | 8 | 0.00  | 0.03  | 0.03  | -0.02 | 0.01  | -0.05 | 0.03  | -0.01 | 0.05  |
| 60 | 8 | 0.01  | 0.01  | -0.06 | 0.04  | -0.04 | -0.07 | -0.01 | -0.03 | -0.01 |
| 61 | 8 | 0.01  | 0.05  | -0.01 | 0.02  | -0.03 | -0.01 | 0.02  | -0.06 | 0.02  |
| 62 | 6 | 0.00  | 0.03  | -0.02 | 0.04  | -0.04 | -0.07 | -0.06 | -0.01 | -0.01 |
| 63 | 6 | -0.01 | 0.00  | 0.03  | -0.06 | -0.03 | -0.07 | -0.11 | -0.02 | 0.00  |
| 64 | 6 | 0.10  | -0.04 | 0.18  | -0.03 | -0.02 | 0.01  | -0.13 | 0.02  | 0.02  |
| 65 | 8 | 0.00  | 0.08  | -0.02 | 0.11  | -0.04 | -0.05 | -0.06 | 0.00  | -0.01 |
| 66 | 1 | 0.19  | -0.03 | 0.24  | 0.07  | -0.01 | 0.07  | -0.11 | 0.04  | 0.03  |
| 67 | 6 | 0.10  | -0.08 | 0.27  | -0.12 | -0.01 | 0.03  | -0.20 | 0.03  | 0.03  |
| 68 | 1 | 0.00  | -0.07 | 0.19  | -0.22 | -0.02 | -0.05 | -0.23 | -0.01 | 0.02  |
| 69 | 1 | 0.06  | -0.16 | 0.42  | -0.16 | 0.01  | 0.15  | -0.21 | 0.07  | 0.05  |
| 70 | 1 | 0.26  | -0.03 | 0.29  | -0.04 | -0.02 | 0.01  | -0.22 | 0.02  | 0.03  |
| 71 | 6 | -0.15 | 0.01  | -0.08 | -0.18 | -0.04 | -0.17 | -0.15 | -0.05 | -0.02 |
| 72 | 1 | -0.14 | 0.02  | -0.18 | -0.12 | -0.11 | -0.22 | -0.10 | -0.11 | -0.03 |
| 73 | 1 | -0.26 | 0.00  | -0.02 | -0.26 | 0.05  | -0.12 | -0.15 | -0.01 | -0.01 |
| 74 | 1 | -0.13 | 0.01  | -0.12 | -0.26 | -0.06 | -0.26 | -0.21 | -0.07 | -0.05 |

|                | 4       | 5       | 6       |
|----------------|---------|---------|---------|
|                | A       | A       | A       |
| Frequencies -- | 42.7727 | 50.0760 | 53.6326 |
| Red. masses -- | 4.3466  | 4.5918  | 4.6941  |
| Frc consts --  | 0.0047  | 0.0068  | 0.0080  |
| IR Inten --    | 0.3353  | 0.3019  | 0.6349  |

|    |      |       |                |        |       |        |       |        |       |       |   |
|----|------|-------|----------------|--------|-------|--------|-------|--------|-------|-------|---|
|    |      |       | Raman Activ -- | 1.5162 |       | 1.0605 |       | 2.2891 |       |       |   |
|    |      |       | Depolar (P) -- | 0.7498 |       | 0.6123 |       | 0.7100 |       |       |   |
|    |      |       | Depolar (U) -- | 0.8570 |       | 0.7595 |       | 0.8304 |       |       |   |
|    | Atom | AN    | X              | Y      | Z     | X      | Y     | Z      | X     | Y     | Z |
| 1  | 6    | -0.01 | -0.01          | -0.03  | 0.02  | -0.01  | 0.03  | -0.02  | -0.02 | 0.00  |   |
| 2  | 6    | -0.04 | 0.03           | -0.06  | 0.06  | -0.07  | 0.08  | -0.05  | -0.02 | -0.01 |   |
| 3  | 6    | 0.00  | -0.01          | 0.01   | 0.01  | 0.00   | -0.03 | -0.01  | 0.00  | 0.01  |   |
| 4  | 6    | 0.01  | -0.01          | 0.01   | 0.01  | 0.00   | -0.03 | 0.01   | 0.02  | 0.00  |   |
| 5  | 6    | 0.01  | 0.01           | 0.02   | 0.01  | 0.00   | -0.04 | 0.01   | 0.04  | -0.01 |   |
| 6  | 6    | 0.01  | 0.00           | 0.03   | 0.01  | 0.03   | -0.06 | 0.01   | 0.03  | 0.00  |   |
| 7  | 8    | -0.08 | 0.05           | -0.10  | 0.11  | -0.10  | 0.15  | -0.06  | -0.02 | 0.00  |   |
| 8  | 6    | 0.01  | -0.01          | 0.00   | 0.01  | -0.03  | -0.02 | -0.01  | -0.06 | -0.02 |   |
| 9  | 6    | 0.01  | -0.02          | 0.02   | 0.02  | -0.01  | -0.02 | 0.04   | -0.04 | 0.01  |   |
| 10 | 1    | 0.01  | -0.04          | 0.02   | 0.02  | 0.00   | -0.02 | 0.03   | -0.06 | 0.01  |   |
| 11 | 8    | 0.02  | -0.01          | 0.03   | 0.02  | -0.02  | -0.04 | 0.07   | -0.05 | 0.03  |   |
| 12 | 6    | 0.01  | -0.01          | 0.01   | 0.02  | 0.00   | -0.02 | 0.04   | 0.00  | 0.01  |   |
| 13 | 1    | 0.02  | 0.00           | 0.01   | 0.03  | -0.01  | -0.01 | 0.06   | 0.00  | 0.01  |   |
| 14 | 6    | 0.02  | 0.02           | 0.01   | -0.02 | 0.01   | -0.01 | 0.01   | -0.01 | -0.01 |   |
| 15 | 8    | 0.15  | -0.04          | -0.14  | -0.04 | -0.01  | 0.00  | -0.08  | -0.10 | 0.04  |   |
| 16 | 6    | 0.00  | -0.04          | 0.00   | 0.01  | -0.02  | -0.02 | 0.00   | -0.12 | -0.05 |   |
| 17 | 1    | 0.01  | -0.03          | 0.01   | 0.01  | -0.04  | -0.03 | 0.00   | -0.12 | -0.06 |   |
| 18 | 1    | 0.00  | -0.06          | 0.02   | 0.03  | 0.01   | -0.04 | 0.03   | -0.15 | -0.03 |   |
| 19 | 1    | 0.00  | -0.04          | -0.02  | 0.00  | -0.01  | 0.02  | -0.02  | -0.13 | -0.09 |   |
| 20 | 6    | 0.00  | -0.01          | 0.00   | 0.02  | -0.02  | 0.00  | 0.00   | -0.03 | 0.00  |   |
| 21 | 1    | 0.01  | 0.02           | 0.00   | 0.01  | -0.04  | 0.00  | 0.00   | -0.01 | 0.01  |   |
| 22 | 6    | -0.01 | -0.05          | -0.06  | 0.00  | 0.04   | 0.08  | -0.03  | -0.05 | -0.01 |   |
| 23 | 1    | -0.01 | -0.05          | -0.08  | 0.00  | 0.02   | 0.13  | -0.03  | -0.05 | -0.02 |   |
| 24 | 1    | 0.01  | -0.08          | -0.04  | -0.02 | 0.07   | 0.06  | -0.02  | -0.06 | -0.01 |   |
| 25 | 1    | -0.01 | -0.06          | -0.08  | -0.02 | 0.06   | 0.11  | -0.04  | -0.04 | -0.02 |   |
| 26 | 6    | -0.01 | 0.00           | 0.07   | 0.02  | 0.03   | -0.13 | -0.01  | 0.03  | 0.01  |   |
| 27 | 1    | -0.05 | -0.01          | 0.09   | 0.05  | 0.07   | -0.17 | -0.01  | 0.04  | 0.01  |   |
| 28 | 1    | 0.01  | 0.03           | 0.09   | -0.02 | -0.02  | -0.17 | -0.02  | 0.05  | 0.01  |   |
| 29 | 6    | 0.03  | 0.00           | 0.03   | 0.00  | -0.04  | -0.04 | 0.04   | -0.05 | 0.01  |   |
| 30 | 1    | 0.03  | 0.02           | 0.03   | -0.01 | -0.06  | -0.04 | 0.03   | -0.01 | 0.02  |   |
| 31 | 1    | 0.03  | -0.01          | 0.04   | 0.00  | -0.04  | -0.07 | 0.05   | -0.08 | 0.01  |   |
| 32 | 6    | 0.00  | 0.01           | -0.01  | 0.01  | -0.06  | 0.01  | -0.06  | -0.03 | -0.04 |   |
| 33 | 1    | 0.01  | 0.02           | -0.01  | -0.01 | -0.07  | -0.01 | -0.08  | -0.03 | -0.06 |   |
| 34 | 6    | -0.02 | 0.03           | -0.04  | 0.03  | -0.08  | 0.05  | -0.09  | -0.01 | -0.04 |   |
| 35 | 1    | -0.03 | 0.05           | -0.06  | 0.03  | -0.11  | 0.07  | -0.13  | 0.00  | -0.05 |   |
| 36 | 6    | 0.01  | -0.02          | 0.01   | -0.01 | 0.00   | -0.03 | 0.00   | 0.01  | 0.00  |   |
| 37 | 1    | 0.05  | -0.01          | 0.01   | -0.05 | -0.01  | -0.03 | 0.02   | 0.02  | 0.00  |   |
| 38 | 1    | -0.01 | 0.00           | 0.01   | 0.02  | -0.02  | -0.04 | -0.03  | 0.02  | 0.00  |   |
| 39 | 1    | 0.01  | -0.05          | 0.01   | 0.00  | 0.04   | -0.02 | -0.01  | -0.02 | 0.01  |   |
| 40 | 6    | -0.02 | -0.01          | 0.04   | 0.02  | 0.02   | -0.09 | -0.02  | 0.01  | 0.02  |   |
| 41 | 1    | -0.03 | -0.01          | 0.03   | 0.03  | 0.02   | -0.08 | -0.03  | 0.00  | 0.03  |   |
| 42 | 6    | 0.02  | -0.04          | 0.02   | 0.00  | 0.09   | -0.04 | 0.03   | 0.03  | 0.00  |   |
| 43 | 1    | 0.03  | -0.06          | 0.02   | -0.01 | 0.13   | -0.06 | 0.03   | 0.04  | -0.01 |   |
| 44 | 1    | 0.03  | -0.04          | -0.01  | 0.01  | 0.09   | 0.00  | 0.04   | 0.03  | 0.00  |   |
| 45 | 1    | 0.02  | -0.05          | 0.04   | 0.00  | 0.10   | -0.06 | 0.03   | 0.02  | 0.01  |   |
| 46 | 6    | 0.03  | 0.03           | 0.00   | 0.00  | -0.03  | -0.01 | 0.02   | 0.07  | -0.04 |   |
| 47 | 1    | 0.04  | 0.04           | -0.01  | -0.01 | -0.04  | 0.02  | 0.02   | 0.08  | -0.06 |   |
| 48 | 6    | 0.03  | 0.04           | -0.01  | 0.00  | -0.01  | -0.01 | 0.02   | 0.06  | -0.06 |   |

|    |   |       |       |       |       |       |       |       |       |       |
|----|---|-------|-------|-------|-------|-------|-------|-------|-------|-------|
| 49 | 1 | 0.04  | 0.07  | -0.02 | -0.01 | -0.04 | 0.00  | 0.03  | 0.10  | -0.07 |
| 50 | 1 | 0.05  | 0.03  | -0.02 | -0.01 | 0.00  | 0.01  | 0.04  | 0.04  | -0.08 |
| 51 | 6 | 0.01  | 0.03  | 0.02  | 0.01  | 0.00  | -0.04 | 0.02  | 0.04  | -0.01 |
| 52 | 1 | 0.00  | 0.05  | 0.03  | 0.03  | -0.02 | -0.05 | 0.03  | 0.07  | 0.02  |
| 53 | 6 | -0.12 | 0.04  | 0.18  | -0.14 | 0.02  | 0.12  | 0.15  | -0.07 | -0.07 |
| 54 | 1 | -0.27 | 0.07  | 0.35  | -0.21 | 0.04  | 0.21  | 0.27  | -0.08 | -0.13 |
| 55 | 6 | -0.04 | 0.00  | 0.08  | -0.15 | 0.02  | 0.12  | 0.09  | -0.12 | -0.04 |
| 56 | 1 | -0.09 | -0.01 | 0.15  | -0.22 | 0.03  | 0.20  | 0.14  | -0.17 | -0.06 |
| 57 | 6 | 0.19  | -0.03 | -0.18 | 0.04  | -0.01 | -0.08 | -0.12 | -0.03 | 0.06  |
| 58 | 1 | 0.33  | -0.05 | -0.35 | 0.13  | -0.03 | -0.18 | -0.25 | -0.01 | 0.12  |
| 59 | 8 | 0.01  | -0.01 | 0.02  | -0.04 | 0.00  | -0.06 | -0.02 | 0.02  | 0.02  |
| 60 | 8 | 0.02  | -0.02 | 0.01  | 0.03  | 0.02  | -0.02 | 0.06  | 0.03  | 0.01  |
| 61 | 8 | 0.01  | 0.04  | 0.02  | 0.00  | -0.05 | -0.05 | 0.01  | 0.09  | -0.01 |
| 62 | 6 | 0.01  | -0.01 | 0.01  | 0.02  | 0.05  | 0.02  | 0.08  | 0.04  | 0.04  |
| 63 | 6 | -0.05 | 0.00  | 0.00  | 0.01  | 0.03  | 0.05  | 0.00  | 0.04  | 0.04  |
| 64 | 6 | -0.07 | 0.02  | 0.02  | -0.07 | 0.08  | 0.01  | -0.07 | 0.11  | 0.03  |
| 65 | 8 | 0.05  | -0.02 | 0.02  | 0.01  | 0.08  | 0.01  | 0.14  | 0.05  | 0.05  |
| 66 | 1 | -0.02 | 0.03  | 0.05  | -0.11 | 0.13  | -0.04 | -0.06 | 0.14  | 0.03  |
| 67 | 6 | -0.14 | 0.04  | 0.01  | -0.10 | 0.09  | 0.02  | -0.19 | 0.14  | 0.00  |
| 68 | 1 | -0.18 | 0.03  | -0.02 | -0.03 | 0.02  | 0.09  | -0.18 | 0.09  | 0.02  |
| 69 | 1 | -0.15 | 0.08  | 0.05  | -0.07 | 0.15  | -0.09 | -0.18 | 0.25  | -0.04 |
| 70 | 1 | -0.13 | 0.02  | -0.01 | -0.24 | 0.09  | 0.05  | -0.29 | 0.11  | 0.00  |
| 71 | 6 | -0.11 | -0.02 | -0.05 | 0.08  | -0.04 | 0.12  | -0.01 | -0.02 | 0.04  |
| 72 | 1 | -0.10 | -0.02 | -0.10 | 0.11  | -0.08 | 0.17  | 0.00  | -0.02 | 0.00  |
| 73 | 1 | -0.16 | -0.03 | -0.03 | 0.16  | -0.02 | 0.08  | -0.02 | -0.06 | 0.04  |
| 74 | 1 | -0.11 | -0.02 | -0.05 | 0.03  | -0.06 | 0.15  | -0.02 | -0.02 | 0.09  |

7

8

9

A

A

A

|                |         |         |         |
|----------------|---------|---------|---------|
| Frequencies -- | 71.4079 | 76.5080 | 90.6128 |
| Red. masses -- | 4.4575  | 4.6773  | 4.8824  |
| Frc consts --  | 0.0134  | 0.0161  | 0.0236  |
| IR Inten --    | 4.1341  | 0.0831  | 1.4905  |
| Raman Activ -- | 0.2454  | 1.3810  | 0.4617  |
| Depolar (P) -- | 0.7196  | 0.7296  | 0.3180  |
| Depolar (U) -- | 0.8369  | 0.8436  | 0.4825  |

| Atom | AN | X     | Y     | Z     | X     | Y     | Z     | X     | Y     | Z     |
|------|----|-------|-------|-------|-------|-------|-------|-------|-------|-------|
| 1    | 6  | 0.02  | 0.02  | 0.03  | -0.03 | 0.01  | -0.01 | 0.01  | -0.01 | 0.00  |
| 2    | 6  | 0.02  | 0.01  | 0.03  | -0.03 | 0.00  | 0.01  | 0.02  | -0.02 | 0.01  |
| 3    | 6  | 0.01  | 0.00  | 0.01  | -0.03 | 0.03  | -0.03 | 0.00  | -0.01 | -0.03 |
| 4    | 6  | -0.01 | -0.01 | 0.03  | -0.01 | 0.03  | -0.01 | 0.02  | -0.03 | 0.03  |
| 5    | 6  | -0.01 | -0.02 | 0.01  | -0.02 | 0.01  | 0.05  | 0.04  | 0.03  | 0.01  |
| 6    | 6  | 0.01  | 0.00  | -0.02 | -0.04 | 0.06  | 0.04  | 0.03  | 0.09  | -0.02 |
| 7    | 8  | 0.14  | -0.05 | 0.12  | -0.03 | 0.00  | 0.02  | 0.04  | -0.03 | 0.02  |
| 8    | 6  | -0.04 | 0.04  | -0.03 | -0.01 | -0.02 | 0.00  | 0.01  | 0.00  | 0.01  |
| 9    | 6  | 0.01  | 0.00  | 0.07  | -0.01 | 0.01  | -0.02 | 0.02  | -0.02 | 0.02  |
| 10   | 1  | 0.00  | -0.02 | 0.06  | -0.01 | 0.02  | -0.02 | 0.04  | -0.03 | 0.01  |
| 11   | 8  | 0.01  | 0.01  | 0.09  | 0.00  | 0.00  | -0.03 | -0.01 | -0.01 | 0.01  |
| 12   | 6  | 0.00  | 0.00  | 0.06  | -0.01 | 0.03  | -0.03 | 0.03  | -0.03 | 0.06  |
| 13   | 1  | -0.01 | -0.01 | 0.06  | -0.01 | 0.03  | -0.04 | 0.04  | -0.04 | 0.07  |
| 14   | 6  | 0.00  | -0.01 | -0.01 | -0.02 | -0.02 | 0.08  | 0.04  | 0.06  | 0.02  |
| 15   | 8  | -0.01 | 0.01  | 0.01  | 0.16  | -0.09 | -0.11 | 0.01  | -0.07 | -0.01 |
| 16   | 6  | 0.00  | -0.06 | -0.13 | -0.02 | -0.02 | 0.01  | 0.01  | 0.01  | 0.01  |

|    |   |       |       |       |       |       |       |       |       |       |
|----|---|-------|-------|-------|-------|-------|-------|-------|-------|-------|
| 17 | 1 | -0.03 | -0.01 | -0.16 | -0.01 | -0.05 | 0.01  | 0.01  | -0.02 | 0.00  |
| 18 | 1 | 0.05  | -0.15 | -0.07 | -0.02 | -0.01 | 0.00  | 0.02  | 0.03  | -0.01 |
| 19 | 1 | 0.00  | -0.10 | -0.24 | -0.04 | -0.02 | 0.03  | 0.00  | 0.01  | 0.03  |
| 20 | 6 | -0.01 | 0.02  | 0.03  | -0.01 | 0.00  | -0.01 | 0.01  | -0.01 | 0.01  |
| 21 | 1 | -0.04 | 0.04  | 0.07  | -0.01 | 0.00  | -0.02 | 0.01  | -0.01 | 0.02  |
| 22 | 6 | 0.01  | 0.03  | 0.04  | -0.05 | 0.01  | 0.01  | -0.01 | -0.01 | 0.01  |
| 23 | 1 | 0.03  | 0.06  | 0.06  | -0.06 | -0.02 | 0.02  | -0.01 | -0.03 | 0.02  |
| 24 | 1 | -0.02 | 0.04  | 0.05  | -0.03 | 0.02  | 0.00  | 0.00  | -0.01 | 0.01  |
| 25 | 1 | 0.02  | 0.02  | 0.03  | -0.07 | 0.03  | 0.02  | -0.03 | 0.00  | 0.01  |
| 26 | 6 | 0.02  | 0.01  | -0.07 | -0.02 | 0.06  | -0.08 | 0.00  | 0.09  | -0.10 |
| 27 | 1 | 0.04  | 0.03  | -0.09 | 0.00  | 0.13  | -0.13 | 0.00  | 0.14  | -0.12 |
| 28 | 1 | 0.00  | -0.03 | -0.09 | -0.05 | -0.02 | -0.13 | -0.01 | 0.04  | -0.12 |
| 29 | 6 | -0.02 | 0.06  | 0.06  | 0.01  | -0.02 | -0.02 | -0.01 | 0.00  | 0.00  |
| 30 | 1 | -0.03 | 0.12  | 0.08  | 0.02  | -0.02 | -0.03 | -0.02 | -0.01 | 0.01  |
| 31 | 1 | -0.01 | 0.04  | 0.06  | 0.01  | -0.03 | -0.02 | -0.01 | 0.01  | -0.01 |
| 32 | 6 | -0.16 | 0.11  | -0.10 | -0.01 | -0.03 | 0.01  | 0.01  | -0.01 | 0.01  |
| 33 | 1 | -0.25 | 0.18  | -0.17 | 0.00  | -0.04 | 0.01  | 0.01  | -0.01 | 0.01  |
| 34 | 6 | -0.14 | 0.10  | -0.07 | -0.02 | -0.02 | 0.01  | 0.02  | -0.02 | 0.01  |
| 35 | 1 | -0.22 | 0.15  | -0.11 | -0.02 | -0.03 | 0.02  | 0.03  | -0.02 | 0.02  |
| 36 | 6 | -0.03 | -0.04 | 0.03  | 0.03  | 0.02  | -0.02 | 0.00  | -0.10 | 0.03  |
| 37 | 1 | -0.06 | -0.05 | 0.04  | 0.03  | 0.01  | -0.01 | -0.01 | -0.12 | 0.06  |
| 38 | 1 | -0.03 | -0.05 | 0.01  | 0.06  | 0.01  | -0.02 | -0.01 | -0.12 | -0.02 |
| 39 | 1 | -0.03 | -0.02 | 0.05  | 0.04  | 0.04  | -0.05 | 0.00  | -0.11 | 0.04  |
| 40 | 6 | 0.02  | 0.01  | -0.04 | -0.03 | 0.06  | -0.07 | -0.01 | 0.06  | -0.11 |
| 41 | 1 | 0.04  | 0.03  | -0.05 | -0.02 | 0.06  | -0.07 | -0.01 | 0.09  | -0.15 |
| 42 | 6 | 0.01  | 0.05  | 0.00  | -0.08 | 0.17  | 0.07  | 0.02  | 0.13  | -0.01 |
| 43 | 1 | 0.01  | 0.07  | -0.01 | -0.10 | 0.22  | 0.06  | -0.01 | 0.17  | 0.00  |
| 44 | 1 | 0.01  | 0.05  | 0.04  | -0.08 | 0.17  | 0.16  | 0.04  | 0.14  | 0.03  |
| 45 | 1 | 0.01  | 0.06  | -0.01 | -0.09 | 0.19  | 0.02  | 0.01  | 0.12  | -0.04 |
| 46 | 6 | -0.02 | -0.03 | 0.02  | -0.04 | -0.05 | 0.13  | 0.08  | 0.07  | -0.01 |
| 47 | 1 | -0.02 | -0.03 | 0.03  | -0.05 | -0.07 | 0.16  | 0.10  | 0.05  | -0.01 |
| 48 | 6 | -0.01 | -0.03 | 0.01  | -0.08 | -0.06 | 0.19  | 0.09  | 0.12  | -0.03 |
| 49 | 1 | -0.02 | -0.05 | 0.01  | -0.06 | -0.14 | 0.25  | 0.10  | 0.17  | -0.05 |
| 50 | 1 | -0.02 | -0.01 | 0.03  | -0.14 | 0.01  | 0.25  | 0.13  | 0.09  | -0.06 |
| 51 | 6 | 0.00  | -0.02 | -0.01 | -0.05 | -0.02 | 0.11  | 0.05  | 0.11  | 0.00  |
| 52 | 1 | 0.01  | -0.03 | -0.03 | -0.01 | -0.08 | 0.06  | 0.07  | 0.13  | 0.03  |
| 53 | 6 | -0.04 | 0.00  | 0.01  | 0.06  | -0.05 | 0.03  | 0.11  | 0.00  | 0.05  |
| 54 | 1 | -0.05 | 0.00  | 0.02  | 0.04  | -0.04 | 0.07  | 0.16  | 0.02  | 0.08  |
| 55 | 6 | -0.04 | 0.02  | 0.02  | 0.17  | -0.09 | -0.08 | 0.09  | -0.07 | 0.03  |
| 56 | 1 | -0.06 | 0.03  | 0.03  | 0.25  | -0.11 | -0.16 | 0.12  | -0.13 | 0.04  |
| 57 | 6 | 0.01  | 0.00  | -0.01 | 0.05  | -0.05 | 0.00  | -0.01 | 0.01  | -0.01 |
| 58 | 1 | 0.03  | -0.01 | -0.02 | 0.04  | -0.04 | -0.02 | -0.07 | 0.02  | -0.04 |
| 59 | 8 | -0.01 | -0.02 | -0.03 | -0.06 | 0.04  | -0.05 | -0.04 | -0.04 | -0.11 |
| 60 | 8 | 0.01  | 0.00  | 0.05  | 0.01  | 0.02  | -0.04 | -0.02 | -0.05 | 0.08  |
| 61 | 8 | -0.02 | -0.04 | 0.00  | 0.02  | -0.09 | 0.05  | 0.01  | 0.07  | 0.00  |
| 62 | 6 | 0.07  | -0.04 | 0.02  | 0.03  | 0.02  | -0.03 | -0.13 | -0.05 | 0.04  |
| 63 | 6 | 0.02  | -0.01 | -0.04 | 0.03  | 0.01  | -0.03 | -0.09 | -0.03 | 0.01  |
| 64 | 6 | 0.06  | -0.04 | -0.01 | 0.03  | 0.02  | -0.02 | -0.06 | -0.08 | 0.00  |
| 65 | 8 | 0.14  | -0.11 | 0.03  | 0.04  | 0.02  | -0.03 | -0.23 | -0.06 | 0.02  |
| 66 | 1 | 0.14  | -0.09 | 0.05  | 0.04  | 0.02  | -0.02 | -0.06 | -0.12 | 0.01  |
| 67 | 6 | 0.03  | -0.01 | -0.06 | 0.02  | 0.01  | 0.00  | 0.01  | -0.08 | -0.04 |
| 68 | 1 | -0.09 | 0.07  | -0.17 | 0.01  | -0.01 | 0.00  | -0.01 | 0.00  | -0.07 |

|    |   |       |       |       |       |       |       |       |       |       |
|----|---|-------|-------|-------|-------|-------|-------|-------|-------|-------|
| 69 | 1 | -0.02 | -0.04 | 0.09  | 0.02  | 0.00  | 0.02  | 0.00  | -0.14 | 0.02  |
| 70 | 1 | 0.18  | -0.05 | -0.13 | 0.03  | 0.02  | 0.01  | 0.11  | -0.09 | -0.07 |
| 71 | 6 | -0.08 | 0.04  | -0.13 | 0.03  | 0.01  | -0.03 | -0.11 | 0.01  | -0.01 |
| 72 | 1 | -0.09 | 0.06  | -0.19 | 0.11  | -0.11 | 0.06  | -0.23 | 0.19  | -0.13 |
| 73 | 1 | -0.17 | 0.06  | -0.09 | 0.08  | 0.17  | -0.02 | -0.19 | -0.21 | -0.01 |
| 74 | 1 | -0.06 | 0.05  | -0.19 | -0.10 | -0.04 | -0.12 | 0.10  | 0.08  | 0.11  |

|                |  |          |  |          |  |          |
|----------------|--|----------|--|----------|--|----------|
|                |  | 10       |  | 11       |  | 12       |
|                |  | A        |  | A        |  | A        |
| Frequencies -- |  | 104.4721 |  | 119.0906 |  | 123.1672 |
| Red. masses -- |  | 2.5173   |  | 1.1730   |  | 2.4880   |
| Frc consts --  |  | 0.0162   |  | 0.0098   |  | 0.0222   |
| IR Inten --    |  | 0.6525   |  | 0.9543   |  | 0.3141   |
| Raman Activ -- |  | 1.0657   |  | 0.6192   |  | 1.0485   |
| Depolar (P) -- |  | 0.5994   |  | 0.7438   |  | 0.7454   |
| Depolar (U) -- |  | 0.7495   |  | 0.8531   |  | 0.8541   |

| Atom | AN | X     | Y     | Z     | X     | Y     | Z     | X     | Y     | Z     |
|------|----|-------|-------|-------|-------|-------|-------|-------|-------|-------|
| 1    | 6  | 0.01  | 0.02  | 0.02  | 0.00  | 0.00  | 0.00  | 0.00  | 0.00  | 0.00  |
| 2    | 6  | -0.01 | 0.04  | 0.00  | -0.01 | 0.00  | 0.00  | 0.01  | 0.00  | 0.01  |
| 3    | 6  | 0.01  | 0.02  | 0.02  | 0.00  | 0.00  | 0.01  | -0.01 | -0.01 | 0.00  |
| 4    | 6  | 0.01  | 0.03  | 0.00  | 0.00  | 0.01  | 0.00  | -0.01 | -0.02 | 0.02  |
| 5    | 6  | 0.00  | 0.03  | -0.01 | 0.00  | 0.00  | 0.00  | 0.00  | 0.01  | 0.01  |
| 6    | 6  | 0.01  | 0.02  | -0.01 | 0.01  | 0.00  | -0.01 | 0.00  | 0.02  | 0.00  |
| 7    | 8  | 0.02  | 0.02  | 0.01  | -0.01 | 0.01  | -0.01 | -0.02 | 0.01  | 0.00  |
| 8    | 6  | 0.02  | 0.00  | 0.02  | 0.01  | -0.01 | 0.01  | -0.03 | 0.04  | -0.03 |
| 9    | 6  | 0.02  | 0.01  | 0.03  | 0.01  | 0.00  | 0.00  | -0.02 | 0.00  | -0.01 |
| 10   | 1  | 0.00  | 0.01  | 0.05  | 0.00  | 0.00  | 0.01  | 0.01  | 0.01  | -0.02 |
| 11   | 8  | 0.04  | 0.01  | 0.05  | 0.02  | -0.01 | 0.01  | -0.06 | 0.02  | -0.04 |
| 12   | 6  | 0.01  | 0.01  | -0.02 | 0.01  | 0.01  | 0.00  | -0.01 | -0.02 | 0.02  |
| 13   | 1  | -0.02 | 0.04  | -0.06 | 0.01  | 0.01  | -0.01 | -0.01 | -0.02 | 0.02  |
| 14   | 6  | 0.00  | 0.01  | -0.01 | 0.00  | 0.00  | -0.01 | 0.01  | 0.03  | 0.00  |
| 15   | 8  | -0.01 | -0.01 | -0.01 | -0.01 | 0.00  | 0.00  | -0.02 | -0.02 | -0.01 |
| 16   | 6  | 0.03  | -0.07 | -0.02 | 0.01  | -0.03 | 0.00  | -0.01 | 0.14  | -0.03 |
| 17   | 1  | 0.02  | -0.03 | -0.01 | 0.01  | -0.03 | 0.01  | -0.02 | 0.09  | -0.06 |
| 18   | 1  | 0.04  | -0.13 | 0.03  | 0.01  | -0.05 | 0.01  | 0.00  | 0.23  | -0.09 |
| 19   | 1  | 0.02  | -0.09 | -0.09 | 0.00  | -0.04 | -0.02 | 0.01  | 0.17  | 0.08  |
| 20   | 6  | 0.03  | 0.01  | 0.03  | 0.01  | 0.00  | 0.01  | -0.02 | 0.01  | -0.01 |
| 21   | 1  | 0.03  | 0.02  | 0.03  | 0.01  | 0.00  | 0.01  | -0.03 | 0.00  | 0.00  |
| 22   | 6  | 0.00  | 0.00  | 0.01  | 0.00  | -0.01 | 0.00  | 0.02  | 0.03  | 0.00  |
| 23   | 1  | 0.00  | 0.01  | 0.02  | 0.00  | -0.01 | 0.00  | 0.02  | 0.04  | -0.01 |
| 24   | 1  | -0.03 | -0.02 | 0.03  | 0.00  | -0.02 | 0.01  | 0.01  | 0.04  | -0.01 |
| 25   | 1  | -0.01 | -0.02 | -0.01 | -0.01 | -0.01 | -0.01 | 0.04  | 0.02  | 0.01  |
| 26   | 6  | 0.01  | 0.02  | 0.00  | 0.01  | 0.00  | 0.00  | -0.01 | 0.02  | 0.01  |
| 27   | 1  | 0.02  | 0.02  | 0.00  | 0.01  | 0.00  | -0.01 | -0.03 | 0.02  | 0.02  |
| 28   | 1  | 0.00  | 0.03  | 0.00  | 0.00  | 0.01  | -0.01 | 0.00  | 0.03  | 0.02  |
| 29   | 6  | 0.05  | 0.01  | 0.06  | 0.02  | -0.01 | 0.01  | -0.09 | 0.03  | -0.06 |
| 30   | 1  | 0.07  | 0.04  | 0.05  | 0.03  | 0.00  | 0.01  | -0.14 | 0.00  | -0.03 |
| 31   | 1  | 0.06  | 0.00  | 0.08  | 0.03  | -0.02 | 0.02  | -0.11 | 0.06  | -0.11 |
| 32   | 6  | -0.04 | 0.05  | -0.02 | 0.00  | 0.00  | 0.00  | 0.01  | 0.00  | 0.01  |
| 33   | 1  | -0.07 | 0.07  | -0.05 | -0.01 | 0.00  | 0.00  | 0.02  | -0.02 | 0.02  |
| 34   | 6  | -0.06 | 0.07  | -0.04 | -0.01 | 0.01  | -0.01 | 0.04  | -0.03 | 0.03  |
| 35   | 1  | -0.11 | 0.11  | -0.07 | -0.02 | 0.01  | -0.01 | 0.08  | -0.05 | 0.05  |
| 36   | 6  | 0.00  | 0.05  | 0.01  | 0.00  | 0.02  | 0.00  | -0.01 | -0.03 | 0.02  |

|    |   |       |       |       |       |       |       |       |       |       |
|----|---|-------|-------|-------|-------|-------|-------|-------|-------|-------|
| 37 | 1 | 0.01  | 0.07  | -0.01 | 0.00  | 0.02  | 0.00  | -0.02 | -0.05 | 0.03  |
| 38 | 1 | -0.02 | 0.07  | 0.02  | 0.00  | 0.02  | 0.01  | -0.01 | -0.05 | 0.00  |
| 39 | 1 | -0.01 | 0.03  | 0.01  | 0.00  | 0.01  | 0.00  | -0.01 | -0.03 | 0.02  |
| 40 | 6 | 0.01  | 0.02  | 0.02  | 0.01  | 0.00  | 0.01  | -0.01 | 0.01  | -0.01 |
| 41 | 1 | 0.01  | 0.01  | 0.03  | 0.01  | -0.01 | 0.02  | -0.02 | 0.03  | -0.03 |
| 42 | 6 | 0.00  | 0.01  | -0.02 | 0.01  | 0.00  | -0.01 | 0.01  | 0.01  | 0.00  |
| 43 | 1 | -0.02 | 0.02  | -0.01 | 0.01  | 0.00  | -0.01 | 0.00  | 0.01  | 0.00  |
| 44 | 1 | 0.00  | 0.01  | -0.02 | 0.01  | 0.00  | -0.01 | 0.02  | 0.01  | -0.01 |
| 45 | 1 | -0.01 | 0.00  | -0.03 | 0.01  | 0.00  | -0.01 | 0.00  | -0.01 | 0.00  |
| 46 | 6 | -0.01 | 0.01  | 0.00  | -0.01 | -0.01 | 0.01  | 0.01  | 0.02  | 0.00  |
| 47 | 1 | -0.02 | 0.00  | 0.03  | -0.01 | -0.01 | 0.02  | 0.02  | 0.01  | 0.02  |
| 48 | 6 | -0.01 | 0.02  | 0.00  | -0.01 | -0.01 | 0.00  | 0.04  | 0.06  | -0.03 |
| 49 | 1 | -0.01 | 0.01  | -0.01 | -0.01 | -0.02 | 0.00  | 0.03  | 0.09  | -0.05 |
| 50 | 1 | 0.00  | 0.02  | 0.00  | -0.01 | 0.00  | 0.01  | 0.08  | 0.04  | -0.04 |
| 51 | 6 | 0.00  | 0.02  | -0.01 | 0.00  | 0.00  | -0.01 | 0.01  | 0.05  | -0.01 |
| 52 | 1 | 0.00  | 0.01  | -0.01 | 0.00  | -0.01 | -0.02 | 0.00  | 0.07  | 0.01  |
| 53 | 6 | 0.00  | 0.00  | 0.00  | 0.00  | 0.00  | -0.01 | 0.03  | 0.01  | 0.02  |
| 54 | 1 | 0.01  | 0.01  | 0.01  | 0.00  | 0.00  | -0.01 | 0.06  | 0.02  | 0.03  |
| 55 | 6 | 0.00  | -0.01 | 0.00  | -0.01 | 0.00  | 0.00  | 0.02  | -0.02 | 0.01  |
| 56 | 1 | 0.00  | -0.02 | 0.01  | -0.02 | 0.00  | 0.01  | 0.02  | -0.05 | 0.02  |
| 57 | 6 | -0.01 | 0.00  | -0.01 | 0.00  | 0.00  | -0.01 | -0.02 | 0.01  | -0.02 |
| 58 | 1 | -0.02 | 0.00  | -0.02 | 0.00  | 0.00  | -0.01 | -0.04 | 0.02  | -0.03 |
| 59 | 8 | 0.00  | 0.03  | 0.03  | 0.00  | 0.01  | 0.02  | -0.01 | -0.02 | -0.02 |
| 60 | 8 | 0.04  | -0.07 | -0.06 | 0.01  | 0.00  | -0.01 | -0.03 | -0.02 | 0.03  |
| 61 | 8 | 0.00  | 0.01  | -0.01 | 0.00  | -0.01 | -0.01 | -0.02 | 0.02  | 0.00  |
| 62 | 6 | -0.04 | -0.04 | -0.06 | -0.02 | 0.01  | 0.00  | 0.05  | -0.06 | 0.01  |
| 63 | 6 | -0.01 | -0.07 | -0.02 | -0.01 | 0.01  | 0.00  | 0.03  | -0.05 | 0.00  |
| 64 | 6 | -0.04 | -0.05 | -0.02 | -0.02 | 0.01  | -0.02 | 0.01  | -0.03 | 0.00  |
| 65 | 8 | -0.10 | -0.01 | -0.07 | -0.05 | 0.02  | -0.01 | 0.12  | -0.10 | 0.03  |
| 66 | 1 | -0.08 | 0.01  | -0.07 | -0.02 | 0.01  | -0.02 | 0.02  | 0.00  | 0.00  |
| 67 | 6 | -0.02 | -0.09 | 0.08  | -0.01 | 0.01  | -0.01 | -0.05 | -0.04 | 0.05  |
| 68 | 1 | 0.14  | -0.26 | 0.25  | -0.37 | 0.22  | -0.34 | -0.17 | -0.04 | -0.04 |
| 69 | 1 | 0.05  | -0.04 | -0.16 | -0.16 | -0.19 | 0.49  | -0.10 | -0.06 | 0.20  |
| 70 | 1 | -0.27 | -0.01 | 0.20  | 0.54  | -0.03 | -0.14 | 0.07  | -0.03 | 0.04  |
| 71 | 6 | 0.06  | -0.11 | 0.04  | 0.03  | 0.00  | 0.03  | 0.06  | -0.07 | 0.02  |
| 72 | 1 | 0.23  | -0.35 | 0.26  | 0.08  | -0.08 | 0.12  | 0.26  | -0.36 | 0.25  |
| 73 | 1 | 0.22  | 0.21  | 0.03  | 0.10  | 0.10  | 0.02  | 0.21  | 0.32  | 0.03  |
| 74 | 1 | -0.22 | -0.20 | -0.13 | -0.05 | -0.03 | -0.01 | -0.27 | -0.18 | -0.20 |

|      |                |          |       |       |          |       |       |          |      |       |
|------|----------------|----------|-------|-------|----------|-------|-------|----------|------|-------|
|      |                | 13       |       |       | 14       |       |       | 15       |      |       |
|      |                | A        |       |       | A        |       |       | A        |      |       |
|      | Frequencies -- | 135.9039 |       |       | 145.8491 |       |       | 166.4368 |      |       |
|      | Red. masses -- | 3.0160   |       |       | 2.0576   |       |       | 2.8850   |      |       |
|      | Frc consts --  | 0.0328   |       |       | 0.0258   |       |       | 0.0471   |      |       |
|      | IR Inten --    | 1.1957   |       |       | 0.2125   |       |       | 1.4916   |      |       |
|      | Raman Activ -- | 1.0141   |       |       | 0.5359   |       |       | 1.0724   |      |       |
|      | Depolar (P) -- | 0.7131   |       |       | 0.6401   |       |       | 0.6134   |      |       |
|      | Depolar (U) -- | 0.8325   |       |       | 0.7806   |       |       | 0.7604   |      |       |
| Atom | AN             | X        | Y     | Z     | X        | Y     | Z     | X        | Y    | Z     |
| 1    | 6              | 0.00     | 0.02  | -0.02 | -0.01    | 0.00  | -0.03 | 0.00     | 0.06 | -0.03 |
| 2    | 6              | 0.05     | 0.00  | 0.00  | 0.03     | -0.02 | -0.01 | -0.01    | 0.01 | 0.00  |
| 3    | 6              | -0.02    | 0.00  | -0.04 | -0.01    | -0.02 | -0.04 | 0.01     | 0.03 | 0.00  |
| 4    | 6              | -0.02    | -0.01 | -0.04 | -0.01    | -0.02 | -0.02 | 0.01     | 0.01 | 0.02  |

|    |   |       |       |       |       |       |       |       |       |       |
|----|---|-------|-------|-------|-------|-------|-------|-------|-------|-------|
| 5  | 6 | -0.02 | 0.01  | 0.00  | 0.00  | -0.01 | 0.00  | 0.00  | 0.01  | 0.01  |
| 6  | 6 | -0.06 | -0.03 | 0.05  | -0.02 | -0.03 | 0.02  | 0.02  | 0.02  | -0.01 |
| 7  | 8 | 0.12  | -0.04 | 0.05  | 0.08  | -0.05 | 0.03  | -0.06 | 0.04  | 0.01  |
| 8  | 6 | 0.01  | 0.02  | 0.00  | 0.00  | -0.01 | 0.01  | 0.01  | -0.02 | -0.02 |
| 9  | 6 | -0.02 | 0.00  | -0.01 | -0.02 | 0.00  | -0.02 | -0.01 | 0.02  | -0.06 |
| 10 | 1 | -0.05 | -0.01 | -0.01 | -0.03 | -0.03 | -0.02 | 0.01  | -0.01 | -0.08 |
| 11 | 8 | -0.01 | 0.01  | 0.02  | -0.01 | 0.00  | 0.01  | 0.00  | 0.02  | -0.06 |
| 12 | 6 | -0.03 | -0.02 | -0.05 | -0.02 | 0.00  | 0.00  | 0.00  | 0.01  | 0.02  |
| 13 | 1 | -0.05 | -0.01 | -0.06 | -0.01 | -0.01 | 0.02  | 0.05  | 0.00  | 0.04  |
| 14 | 6 | -0.04 | 0.00  | 0.07  | 0.00  | 0.00  | 0.03  | 0.02  | 0.02  | -0.04 |
| 15 | 8 | 0.06  | 0.01  | -0.02 | 0.02  | 0.00  | 0.01  | -0.04 | -0.01 | -0.01 |
| 16 | 6 | -0.01 | -0.02 | 0.02  | -0.04 | -0.07 | 0.05  | -0.05 | -0.14 | 0.03  |
| 17 | 1 | 0.00  | 0.04  | 0.06  | -0.02 | -0.01 | 0.12  | -0.01 | 0.00  | 0.13  |
| 18 | 1 | -0.04 | -0.08 | 0.06  | -0.10 | -0.16 | 0.11  | -0.13 | -0.31 | 0.15  |
| 19 | 1 | 0.00  | -0.04 | -0.05 | -0.05 | -0.10 | -0.04 | -0.04 | -0.20 | -0.18 |
| 20 | 6 | -0.01 | 0.02  | -0.02 | -0.02 | 0.00  | -0.03 | -0.02 | 0.04  | -0.08 |
| 21 | 1 | 0.01  | 0.02  | -0.04 | -0.01 | 0.01  | -0.04 | 0.00  | 0.05  | -0.09 |
| 22 | 6 | -0.01 | 0.05  | 0.01  | -0.02 | 0.02  | -0.01 | 0.05  | 0.17  | 0.00  |
| 23 | 1 | -0.01 | 0.04  | 0.03  | -0.04 | -0.04 | -0.01 | -0.06 | -0.05 | -0.04 |
| 24 | 1 | -0.01 | 0.08  | -0.01 | 0.03  | 0.04  | -0.04 | 0.27  | 0.31  | -0.18 |
| 25 | 1 | -0.01 | 0.07  | 0.03  | -0.04 | 0.05  | 0.03  | -0.01 | 0.33  | 0.26  |
| 26 | 6 | -0.04 | -0.03 | 0.06  | -0.02 | -0.03 | 0.04  | 0.01  | 0.02  | 0.03  |
| 27 | 1 | -0.10 | -0.04 | 0.10  | -0.07 | -0.04 | 0.07  | -0.01 | 0.00  | 0.06  |
| 28 | 1 | 0.03  | -0.02 | 0.10  | 0.03  | -0.02 | 0.06  | 0.03  | 0.06  | 0.06  |
| 29 | 6 | 0.03  | 0.03  | 0.03  | 0.04  | -0.01 | 0.04  | 0.11  | -0.01 | 0.01  |
| 30 | 1 | 0.07  | 0.05  | 0.01  | 0.09  | 0.02  | 0.01  | 0.22  | 0.04  | -0.05 |
| 31 | 1 | 0.04  | 0.02  | 0.08  | 0.06  | -0.03 | 0.09  | 0.14  | -0.05 | 0.12  |
| 32 | 6 | 0.01  | 0.04  | -0.01 | 0.01  | 0.00  | 0.00  | 0.01  | -0.03 | -0.02 |
| 33 | 1 | -0.01 | 0.06  | -0.02 | 0.01  | 0.02  | 0.00  | 0.01  | -0.04 | -0.02 |
| 34 | 6 | 0.02  | 0.03  | -0.01 | 0.01  | 0.00  | -0.01 | 0.02  | -0.03 | 0.01  |
| 35 | 1 | 0.02  | 0.03  | -0.02 | 0.03  | 0.00  | -0.02 | 0.03  | -0.06 | 0.04  |
| 36 | 6 | -0.01 | -0.02 | -0.04 | 0.00  | -0.05 | -0.02 | 0.00  | 0.00  | 0.02  |
| 37 | 1 | 0.01  | -0.01 | -0.04 | 0.01  | -0.06 | 0.00  | -0.02 | -0.01 | 0.03  |
| 38 | 1 | -0.02 | -0.01 | -0.04 | 0.00  | -0.06 | -0.04 | 0.02  | -0.01 | 0.01  |
| 39 | 1 | -0.01 | -0.04 | -0.05 | 0.00  | -0.06 | -0.03 | 0.01  | 0.03  | 0.02  |
| 40 | 6 | -0.03 | -0.01 | -0.03 | -0.02 | -0.02 | -0.03 | 0.01  | 0.03  | 0.00  |
| 41 | 1 | -0.04 | 0.01  | -0.06 | -0.03 | 0.00  | -0.06 | 0.00  | 0.05  | -0.02 |
| 42 | 6 | -0.10 | -0.05 | 0.03  | -0.01 | -0.06 | 0.01  | 0.02  | -0.01 | -0.02 |
| 43 | 1 | -0.11 | -0.07 | 0.05  | 0.00  | -0.09 | 0.02  | 0.04  | -0.05 | -0.01 |
| 44 | 1 | -0.10 | -0.05 | 0.01  | -0.02 | -0.06 | -0.02 | 0.01  | -0.02 | -0.06 |
| 45 | 1 | -0.10 | -0.05 | 0.01  | -0.01 | -0.06 | 0.02  | 0.03  | -0.01 | -0.01 |
| 46 | 6 | 0.02  | 0.07  | -0.05 | 0.03  | 0.02  | -0.03 | -0.02 | -0.03 | 0.05  |
| 47 | 1 | 0.05  | 0.09  | -0.11 | 0.05  | 0.02  | -0.05 | -0.04 | -0.05 | 0.09  |
| 48 | 6 | 0.00  | 0.04  | -0.01 | 0.03  | 0.02  | -0.03 | -0.01 | -0.01 | 0.02  |
| 49 | 1 | 0.03  | 0.08  | 0.01  | 0.04  | 0.07  | -0.04 | -0.02 | -0.03 | 0.01  |
| 50 | 1 | -0.03 | 0.00  | -0.06 | 0.05  | -0.01 | -0.06 | 0.01  | 0.02  | 0.06  |
| 51 | 6 | -0.05 | 0.01  | 0.07  | 0.00  | 0.01  | 0.02  | 0.01  | 0.02  | -0.03 |
| 52 | 1 | -0.05 | 0.04  | 0.10  | -0.01 | 0.04  | 0.05  | 0.00  | 0.00  | -0.05 |
| 53 | 6 | -0.02 | 0.01  | 0.02  | 0.01  | 0.00  | 0.01  | 0.02  | 0.01  | -0.01 |
| 54 | 1 | -0.04 | 0.00  | 0.02  | 0.01  | 0.00  | 0.01  | 0.04  | 0.01  | 0.00  |
| 55 | 6 | 0.05  | 0.01  | -0.03 | 0.02  | 0.00  | 0.00  | -0.02 | -0.01 | 0.01  |
| 56 | 1 | 0.09  | 0.02  | -0.08 | 0.04  | 0.00  | -0.01 | -0.03 | -0.03 | 0.04  |



|    |   |       |       |       |       |       |       |       |       |       |
|----|---|-------|-------|-------|-------|-------|-------|-------|-------|-------|
| 57 | 6 | 0.00  | 0.01  | 0.05  | 0.01  | 0.00  | 0.02  | -0.01 | 0.01  | -0.04 |
| 58 | 1 | 0.00  | 0.01  | 0.06  | 0.01  | 0.00  | 0.03  | -0.03 | 0.01  | -0.05 |
| 59 | 8 | 0.01  | -0.03 | -0.06 | 0.01  | -0.04 | -0.05 | 0.04  | 0.01  | -0.01 |
| 60 | 8 | -0.01 | -0.03 | -0.07 | -0.04 | 0.04  | 0.02  | -0.09 | 0.03  | 0.07  |
| 61 | 8 | 0.01  | 0.11  | 0.03  | 0.01  | 0.04  | 0.01  | -0.02 | -0.06 | -0.01 |
| 62 | 6 | 0.02  | -0.02 | -0.03 | -0.03 | 0.04  | 0.01  | -0.02 | -0.02 | 0.02  |
| 63 | 6 | 0.00  | -0.04 | 0.00  | 0.00  | 0.05  | -0.01 | -0.04 | -0.01 | 0.00  |
| 64 | 6 | -0.05 | 0.00  | -0.01 | 0.03  | 0.03  | 0.00  | -0.04 | -0.01 | -0.01 |
| 65 | 8 | 0.07  | 0.00  | -0.03 | -0.04 | 0.03  | 0.01  | 0.06  | -0.09 | 0.04  |
| 66 | 1 | -0.08 | 0.04  | -0.05 | 0.05  | 0.01  | 0.02  | -0.07 | -0.01 | -0.03 |
| 67 | 6 | -0.02 | -0.02 | 0.03  | 0.00  | 0.03  | 0.00  | 0.01  | -0.04 | 0.03  |
| 68 | 1 | -0.13 | 0.03  | -0.06 | 0.02  | 0.00  | 0.03  | 0.04  | -0.05 | 0.05  |
| 69 | 1 | -0.07 | -0.12 | 0.19  | 0.01  | 0.08  | -0.03 | 0.02  | -0.10 | 0.01  |
| 70 | 1 | 0.16  | -0.01 | 0.02  | -0.06 | 0.03  | 0.01  | 0.03  | -0.01 | 0.06  |
| 71 | 6 | 0.06  | -0.12 | 0.06  | -0.02 | 0.11  | -0.03 | 0.00  | -0.03 | 0.03  |
| 72 | 1 | -0.10 | 0.11  | -0.11 | 0.19  | -0.19 | 0.22  | -0.04 | 0.03  | 0.01  |
| 73 | 1 | 0.02  | -0.49 | 0.01  | 0.09  | 0.57  | 0.01  | 0.01  | -0.12 | 0.01  |
| 74 | 1 | 0.32  | -0.04 | 0.34  | -0.35 | 0.00  | -0.35 | 0.06  | -0.01 | 0.11  |

|                |    |          |       |       |  |          |       |       |  |          |       |       |
|----------------|----|----------|-------|-------|--|----------|-------|-------|--|----------|-------|-------|
|                |    | 16       |       |       |  | 17       |       |       |  | 18       |       |       |
|                |    | A        |       |       |  | A        |       |       |  | A        |       |       |
| Frequencies -- |    | 169.3944 |       |       |  | 187.5221 |       |       |  | 190.1561 |       |       |
| Red. masses -- |    | 4.3090   |       |       |  | 1.9453   |       |       |  | 2.6596   |       |       |
| Frc consts --  |    | 0.0728   |       |       |  | 0.0403   |       |       |  | 0.0567   |       |       |
| IR Inten --    |    | 0.5194   |       |       |  | 0.6522   |       |       |  | 1.1203   |       |       |
| Raman Activ -- |    | 1.5299   |       |       |  | 1.2945   |       |       |  | 0.2790   |       |       |
| Depolar (P) -- |    | 0.3876   |       |       |  | 0.3518   |       |       |  | 0.5338   |       |       |
| Depolar (U) -- |    | 0.5587   |       |       |  | 0.5205   |       |       |  | 0.6961   |       |       |
| Atom           | AN | X        | Y     | Z     |  | X        | Y     | Z     |  | X        | Y     | Z     |
| 1              | 6  | -0.03    | -0.02 | 0.02  |  | 0.00     | 0.00  | 0.02  |  | 0.00     | 0.01  | 0.00  |
| 2              | 6  | -0.02    | 0.01  | 0.00  |  | -0.04    | 0.01  | 0.02  |  | 0.00     | 0.00  | 0.03  |
| 3              | 6  | -0.02    | -0.03 | 0.00  |  | 0.00     | -0.01 | 0.00  |  | -0.01    | -0.01 | -0.02 |
| 4              | 6  | 0.00     | -0.02 | -0.04 |  | 0.01     | -0.01 | -0.01 |  | -0.01    | -0.02 | -0.02 |
| 5              | 6  | 0.03     | -0.06 | -0.01 |  | 0.01     | -0.02 | -0.01 |  | -0.01    | -0.02 | -0.01 |
| 6              | 6  | 0.05     | 0.00  | -0.04 |  | 0.02     | -0.03 | -0.01 |  | -0.03    | 0.00  | 0.00  |
| 7              | 8  | 0.04     | -0.03 | 0.02  |  | -0.08    | 0.03  | 0.00  |  | -0.05    | 0.02  | 0.02  |
| 8              | 6  | -0.06    | 0.02  | 0.05  |  | -0.03    | 0.01  | 0.01  |  | 0.00     | 0.02  | -0.01 |
| 9              | 6  | -0.07    | 0.03  | 0.00  |  | -0.01    | 0.01  | 0.02  |  | 0.01     | -0.02 | 0.04  |
| 10             | 1  | -0.09    | 0.07  | 0.01  |  | -0.02    | 0.01  | 0.02  |  | -0.03    | -0.05 | 0.05  |
| 11             | 8  | -0.10    | 0.03  | -0.02 |  | 0.00     | 0.01  | 0.02  |  | 0.06     | -0.01 | 0.10  |
| 12             | 6  | -0.07    | 0.01  | -0.06 |  | -0.01    | 0.01  | 0.00  |  | 0.00     | -0.02 | -0.02 |
| 13             | 1  | -0.12    | 0.01  | -0.06 |  | -0.03    | 0.00  | 0.00  |  | -0.04    | 0.00  | -0.04 |
| 14             | 6  | 0.09     | 0.07  | -0.01 |  | 0.02     | -0.07 | 0.02  |  | -0.01    | 0.07  | 0.00  |
| 15             | 8  | -0.01    | -0.04 | 0.04  |  | 0.05     | 0.03  | 0.04  |  | -0.03    | -0.03 | -0.03 |
| 16             | 6  | -0.12    | 0.01  | 0.13  |  | -0.05    | 0.00  | 0.03  |  | 0.03     | 0.03  | -0.06 |
| 17             | 1  | -0.07    | 0.07  | 0.22  |  | -0.03    | -0.24 | -0.04 |  | 0.01     | -0.22 | -0.19 |
| 18             | 1  | -0.21    | -0.04 | 0.17  |  | 0.06     | 0.18  | -0.10 |  | 0.19     | 0.22  | -0.20 |
| 19             | 1  | -0.11    | -0.01 | 0.07  |  | -0.19    | 0.06  | 0.24  |  | -0.08    | 0.09  | 0.16  |
| 20             | 6  | -0.06    | 0.00  | 0.03  |  | -0.02    | 0.01  | 0.02  |  | 0.01     | 0.01  | 0.00  |
| 21             | 1  | -0.06    | -0.02 | 0.02  |  | -0.03    | 0.01  | 0.03  |  | 0.00     | 0.02  | 0.01  |
| 22             | 6  | -0.06    | -0.06 | 0.01  |  | 0.03     | 0.03  | 0.03  |  | 0.03     | 0.09  | 0.04  |
| 23             | 1  | -0.06    | -0.07 | 0.02  |  | -0.15    | -0.30 | -0.06 |  | -0.09    | -0.15 | -0.02 |
| 24             | 1  | -0.07    | -0.10 | 0.04  |  | 0.37     | 0.16  | -0.17 |  | 0.28     | 0.22  | -0.14 |

|    |   |       |       |       |       |       |       |       |       |       |
|----|---|-------|-------|-------|-------|-------|-------|-------|-------|-------|
| 25 | 1 | -0.08 | -0.07 | -0.03 | -0.11 | 0.27  | 0.32  | -0.04 | 0.26  | 0.29  |
| 26 | 6 | -0.01 | -0.01 | -0.03 | 0.02  | -0.02 | -0.08 | -0.04 | 0.00  | 0.07  |
| 27 | 1 | 0.01  | 0.01  | -0.05 | 0.07  | 0.02  | -0.13 | -0.11 | -0.05 | 0.14  |
| 28 | 1 | -0.06 | 0.01  | -0.05 | -0.03 | -0.08 | -0.13 | 0.03  | 0.06  | 0.14  |
| 29 | 6 | -0.04 | 0.01  | 0.03  | -0.02 | 0.01  | 0.01  | -0.01 | 0.03  | 0.04  |
| 30 | 1 | -0.01 | -0.01 | 0.00  | -0.02 | 0.01  | 0.02  | -0.05 | 0.06  | 0.07  |
| 31 | 1 | -0.04 | 0.00  | 0.06  | -0.01 | -0.01 | 0.00  | -0.01 | 0.03  | 0.00  |
| 32 | 6 | -0.05 | 0.05  | 0.03  | -0.04 | 0.01  | 0.01  | -0.02 | 0.01  | 0.00  |
| 33 | 1 | -0.06 | 0.08  | 0.03  | -0.06 | 0.01  | 0.00  | -0.04 | 0.01  | -0.02 |
| 34 | 6 | -0.08 | 0.07  | -0.03 | -0.05 | 0.01  | 0.01  | 0.02  | -0.02 | 0.03  |
| 35 | 1 | -0.10 | 0.11  | -0.06 | -0.06 | 0.02  | 0.01  | 0.03  | -0.03 | 0.05  |
| 36 | 6 | 0.05  | 0.02  | -0.04 | 0.02  | -0.04 | -0.01 | -0.01 | -0.05 | -0.03 |
| 37 | 1 | 0.06  | 0.03  | -0.05 | 0.13  | 0.00  | -0.01 | 0.05  | -0.03 | -0.02 |
| 38 | 1 | 0.08  | 0.03  | -0.01 | -0.06 | 0.02  | 0.00  | -0.07 | -0.01 | -0.03 |
| 39 | 1 | 0.06  | 0.05  | -0.07 | 0.01  | -0.16 | -0.04 | -0.02 | -0.13 | -0.03 |
| 40 | 6 | -0.02 | -0.04 | 0.03  | 0.02  | -0.02 | -0.02 | -0.03 | 0.00  | -0.01 |
| 41 | 1 | -0.02 | -0.08 | 0.06  | 0.04  | -0.03 | 0.00  | -0.06 | 0.02  | -0.05 |
| 42 | 6 | 0.09  | -0.05 | -0.05 | 0.02  | 0.03  | 0.01  | -0.02 | -0.08 | -0.03 |
| 43 | 1 | 0.06  | -0.04 | -0.04 | 0.01  | 0.06  | 0.00  | -0.02 | -0.11 | -0.01 |
| 44 | 1 | 0.15  | -0.05 | -0.08 | 0.02  | 0.03  | 0.06  | 0.00  | -0.08 | -0.09 |
| 45 | 1 | 0.07  | -0.12 | -0.04 | 0.01  | 0.04  | 0.00  | -0.02 | -0.12 | -0.01 |
| 46 | 6 | 0.07  | -0.09 | 0.06  | 0.03  | 0.02  | -0.06 | 0.01  | -0.05 | 0.05  |
| 47 | 1 | 0.10  | -0.15 | 0.12  | 0.03  | 0.05  | -0.11 | 0.02  | -0.09 | 0.10  |
| 48 | 6 | 0.13  | 0.04  | 0.01  | 0.02  | -0.02 | -0.06 | 0.02  | 0.02  | 0.04  |
| 49 | 1 | 0.11  | 0.08  | -0.04 | 0.02  | 0.00  | -0.06 | 0.02  | 0.03  | 0.04  |
| 50 | 1 | 0.24  | 0.04  | 0.03  | 0.00  | -0.06 | -0.10 | 0.06  | 0.05  | 0.07  |
| 51 | 6 | 0.08  | 0.07  | -0.03 | 0.03  | -0.06 | 0.01  | -0.01 | 0.06  | 0.00  |
| 52 | 1 | 0.06  | 0.08  | -0.04 | 0.05  | -0.04 | 0.03  | -0.04 | 0.05  | -0.02 |
| 53 | 6 | 0.11  | 0.03  | 0.06  | -0.02 | -0.03 | -0.01 | 0.03  | 0.03  | 0.03  |
| 54 | 1 | 0.17  | 0.05  | 0.10  | -0.05 | -0.05 | -0.05 | 0.07  | 0.05  | 0.06  |
| 55 | 6 | 0.05  | -0.04 | 0.09  | 0.00  | 0.03  | 0.00  | 0.02  | -0.03 | 0.01  |
| 56 | 1 | 0.04  | -0.09 | 0.14  | -0.02 | 0.08  | -0.01 | 0.04  | -0.08 | 0.02  |
| 57 | 6 | 0.02  | 0.03  | -0.02 | 0.06  | -0.03 | 0.05  | -0.05 | 0.04  | -0.03 |
| 58 | 1 | -0.02 | 0.04  | -0.06 | 0.10  | -0.04 | 0.08  | -0.09 | 0.04  | -0.07 |
| 59 | 8 | -0.05 | 0.01  | 0.04  | -0.02 | 0.00  | 0.00  | 0.01  | -0.04 | -0.04 |
| 60 | 8 | -0.03 | 0.02  | -0.08 | 0.01  | 0.01  | -0.01 | 0.06  | -0.04 | -0.07 |
| 61 | 8 | 0.01  | -0.14 | -0.03 | 0.03  | 0.06  | 0.01  | -0.01 | -0.08 | -0.02 |
| 62 | 6 | 0.01  | 0.03  | -0.06 | 0.00  | 0.00  | -0.02 | 0.02  | 0.01  | -0.01 |
| 63 | 6 | -0.01 | 0.02  | -0.04 | -0.01 | 0.01  | -0.03 | 0.04  | -0.01 | 0.03  |
| 64 | 6 | -0.02 | 0.04  | -0.03 | -0.02 | 0.02  | -0.02 | 0.05  | -0.02 | 0.03  |
| 65 | 8 | 0.06  | 0.04  | -0.05 | 0.00  | -0.01 | -0.02 | -0.04 | 0.09  | -0.02 |
| 66 | 1 | -0.05 | 0.08  | -0.06 | -0.03 | 0.04  | -0.04 | 0.08  | -0.04 | 0.06  |
| 67 | 6 | 0.02  | 0.01  | 0.04  | 0.00  | -0.01 | 0.03  | -0.01 | 0.03  | -0.06 |
| 68 | 1 | 0.03  | -0.01 | 0.05  | 0.00  | -0.04 | 0.04  | -0.03 | 0.07  | -0.08 |
| 69 | 1 | 0.03  | -0.06 | 0.05  | 0.00  | -0.04 | 0.04  | -0.01 | 0.11  | -0.06 |
| 70 | 1 | 0.06  | 0.06  | 0.08  | 0.02  | 0.03  | 0.07  | -0.04 | -0.04 | -0.12 |
| 71 | 6 | 0.03  | -0.03 | -0.01 | 0.02  | -0.01 | -0.01 | -0.01 | 0.00  | -0.02 |
| 72 | 1 | -0.05 | 0.09  | -0.09 | 0.02  | -0.02 | 0.01  | -0.02 | 0.02  | -0.06 |
| 73 | 1 | 0.01  | -0.21 | -0.04 | 0.04  | 0.00  | -0.02 | -0.06 | -0.01 | 0.01  |
| 74 | 1 | 0.15  | 0.02  | 0.14  | 0.00  | -0.01 | 0.00  | 0.01  | 0.01  | -0.03 |

19

A

20

A

21

A

|                |          |          |          |
|----------------|----------|----------|----------|
| Frequencies -- | 199.4551 | 202.2237 | 209.2974 |
| Red. masses -- | 2.8737   | 2.4440   | 2.6189   |
| Frc consts --  | 0.0674   | 0.0589   | 0.0676   |
| IR Inten --    | 3.7040   | 1.4409   | 0.4059   |
| Raman Activ -- | 0.9640   | 0.6994   | 1.3572   |
| Depolar (P) -- | 0.1838   | 0.3895   | 0.7479   |
| Depolar (U) -- | 0.3106   | 0.5606   | 0.8557   |

| Atom | AN | X     | Y     | Z     | X     | Y     | Z     | X     | Y     | Z     |
|------|----|-------|-------|-------|-------|-------|-------|-------|-------|-------|
| 1    | 6  | 0.00  | 0.02  | 0.02  | 0.00  | -0.01 | -0.03 | -0.01 | -0.03 | -0.03 |
| 2    | 6  | -0.02 | 0.03  | 0.01  | 0.01  | 0.00  | -0.05 | 0.04  | -0.06 | -0.02 |
| 3    | 6  | 0.00  | 0.00  | 0.01  | 0.01  | 0.01  | 0.01  | 0.00  | -0.02 | 0.03  |
| 4    | 6  | 0.00  | -0.01 | 0.00  | 0.01  | 0.02  | 0.02  | -0.01 | 0.00  | 0.01  |
| 5    | 6  | 0.01  | -0.01 | -0.01 | -0.01 | 0.03  | 0.03  | -0.01 | 0.00  | 0.03  |
| 6    | 6  | 0.01  | -0.01 | -0.01 | 0.00  | 0.03  | 0.02  | 0.01  | 0.02  | 0.02  |
| 7    | 8  | -0.05 | 0.05  | -0.01 | 0.14  | -0.07 | 0.01  | 0.03  | -0.05 | -0.05 |
| 8    | 6  | -0.01 | 0.00  | 0.01  | 0.01  | -0.01 | 0.01  | -0.06 | 0.02  | -0.04 |
| 9    | 6  | -0.01 | 0.02  | -0.02 | 0.00  | 0.00  | -0.03 | -0.03 | -0.06 | 0.02  |
| 10   | 1  | 0.02  | 0.07  | -0.03 | 0.03  | 0.01  | -0.04 | -0.07 | -0.14 | 0.02  |
| 11   | 8  | -0.08 | 0.03  | -0.08 | -0.02 | 0.00  | -0.06 | 0.03  | -0.04 | 0.12  |
| 12   | 6  | -0.02 | -0.02 | -0.01 | 0.01  | 0.00  | 0.01  | -0.01 | -0.01 | -0.01 |
| 13   | 1  | -0.04 | 0.00  | -0.03 | 0.03  | 0.01  | 0.00  | 0.00  | 0.00  | -0.02 |
| 14   | 6  | 0.01  | -0.02 | 0.02  | -0.01 | 0.02  | -0.04 | 0.01  | 0.00  | -0.02 |
| 15   | 8  | 0.03  | 0.01  | 0.02  | -0.05 | -0.01 | -0.03 | -0.02 | 0.00  | 0.00  |
| 16   | 6  | -0.03 | -0.03 | 0.04  | -0.04 | 0.01  | 0.09  | -0.08 | 0.01  | -0.01 |
| 17   | 1  | -0.01 | 0.24  | 0.17  | 0.00  | -0.29 | 0.04  | -0.07 | 0.37  | 0.14  |
| 18   | 1  | -0.19 | -0.26 | 0.21  | 0.05  | 0.26  | -0.09 | -0.29 | -0.25 | 0.19  |
| 19   | 1  | 0.08  | -0.11 | -0.22 | -0.22 | 0.10  | 0.38  | 0.09  | -0.08 | -0.32 |
| 20   | 6  | -0.01 | 0.01  | 0.01  | 0.00  | -0.01 | -0.02 | -0.06 | -0.02 | -0.05 |
| 21   | 1  | -0.01 | 0.00  | 0.00  | 0.00  | 0.00  | -0.03 | -0.08 | -0.01 | -0.03 |
| 22   | 6  | 0.01  | 0.05  | 0.04  | 0.02  | -0.07 | -0.08 | 0.08  | 0.04  | -0.05 |
| 23   | 1  | 0.03  | 0.07  | 0.05  | -0.14 | -0.33 | -0.18 | 0.03  | -0.02 | -0.11 |
| 24   | 1  | -0.01 | 0.08  | 0.03  | 0.30  | -0.03 | -0.18 | 0.19  | 0.10  | -0.13 |
| 25   | 1  | 0.03  | 0.05  | 0.05  | -0.11 | 0.10  | 0.09  | 0.10  | 0.08  | 0.08  |
| 26   | 6  | 0.01  | -0.01 | -0.04 | 0.01  | 0.02  | 0.03  | 0.01  | 0.01  | -0.03 |
| 27   | 1  | 0.04  | 0.01  | -0.07 | 0.01  | 0.02  | 0.03  | 0.07  | 0.05  | -0.08 |
| 28   | 1  | -0.02 | -0.04 | -0.07 | 0.00  | 0.04  | 0.03  | -0.06 | -0.02 | -0.08 |
| 29   | 6  | 0.00  | 0.00  | -0.01 | 0.03  | -0.02 | -0.02 | -0.08 | 0.03  | 0.03  |
| 30   | 1  | 0.06  | -0.03 | -0.06 | 0.06  | -0.03 | -0.05 | -0.14 | 0.08  | 0.09  |
| 31   | 1  | 0.01  | 0.00  | 0.03  | 0.03  | -0.03 | 0.01  | -0.09 | 0.04  | -0.02 |
| 32   | 6  | -0.01 | 0.02  | 0.00  | 0.03  | 0.01  | 0.00  | 0.00  | 0.01  | -0.03 |
| 33   | 1  | -0.02 | 0.02  | 0.00  | 0.05  | 0.01  | 0.02  | 0.00  | 0.03  | -0.03 |
| 34   | 6  | -0.03 | 0.03  | 0.00  | -0.04 | 0.05  | -0.07 | 0.11  | -0.07 | 0.02  |
| 35   | 1  | -0.06 | 0.04  | -0.01 | -0.05 | 0.08  | -0.10 | 0.19  | -0.11 | 0.06  |
| 36   | 6  | 0.00  | 0.02  | 0.00  | 0.04  | 0.00  | 0.01  | -0.01 | 0.01  | 0.01  |
| 37   | 1  | -0.04 | 0.01  | 0.00  | 0.18  | 0.06  | 0.00  | 0.11  | 0.07  | -0.02 |
| 38   | 1  | 0.04  | 0.00  | 0.01  | -0.06 | 0.08  | 0.05  | -0.11 | 0.09  | 0.05  |
| 39   | 1  | 0.01  | 0.07  | 0.01  | 0.03  | -0.14 | -0.03 | -0.02 | -0.13 | 0.01  |
| 40   | 6  | 0.01  | 0.00  | -0.01 | 0.00  | 0.01  | 0.04  | 0.00  | -0.02 | 0.05  |
| 41   | 1  | 0.02  | 0.00  | 0.00  | 0.00  | -0.01 | 0.06  | 0.01  | -0.06 | 0.09  |
| 42   | 6  | -0.01 | 0.02  | -0.01 | 0.02  | 0.03  | 0.03  | 0.05  | 0.09  | 0.06  |
| 43   | 1  | -0.04 | 0.05  | 0.00  | 0.02  | 0.04  | 0.02  | 0.04  | 0.16  | 0.02  |
| 44   | 1  | 0.01  | 0.02  | 0.01  | 0.02  | 0.04  | 0.04  | 0.09  | 0.09  | 0.13  |

|    |   |       |       |       |       |       |       |       |       |       |
|----|---|-------|-------|-------|-------|-------|-------|-------|-------|-------|
| 45 | 1 | -0.02 | 0.00  | -0.04 | 0.02  | 0.04  | 0.03  | 0.04  | 0.06  | 0.04  |
| 46 | 6 | 0.02  | 0.00  | -0.03 | -0.04 | 0.02  | 0.03  | -0.02 | 0.02  | 0.01  |
| 47 | 1 | 0.02  | 0.01  | -0.04 | -0.06 | 0.03  | 0.04  | -0.02 | 0.02  | 0.01  |
| 48 | 6 | 0.02  | 0.00  | -0.03 | -0.05 | 0.00  | 0.04  | -0.02 | 0.00  | 0.00  |
| 49 | 1 | 0.02  | 0.02  | -0.04 | -0.05 | -0.06 | 0.05  | -0.02 | -0.01 | 0.00  |
| 50 | 1 | 0.03  | -0.02 | -0.05 | -0.08 | 0.03  | 0.07  | -0.02 | 0.01  | 0.01  |
| 51 | 6 | 0.01  | -0.02 | 0.00  | -0.02 | 0.01  | -0.02 | 0.00  | 0.01  | -0.01 |
| 52 | 1 | 0.03  | -0.01 | 0.02  | -0.04 | -0.01 | -0.04 | -0.01 | 0.00  | -0.02 |
| 53 | 6 | 0.00  | -0.01 | 0.00  | -0.01 | 0.01  | -0.03 | 0.01  | 0.00  | -0.01 |
| 54 | 1 | -0.01 | -0.02 | -0.01 | 0.00  | 0.01  | -0.02 | 0.01  | 0.00  | -0.01 |
| 55 | 6 | 0.01  | 0.01  | 0.00  | -0.03 | -0.01 | -0.01 | -0.02 | 0.00  | 0.00  |
| 56 | 1 | 0.01  | 0.03  | -0.01 | -0.04 | -0.02 | 0.01  | -0.03 | 0.00  | 0.02  |
| 57 | 6 | 0.02  | -0.01 | 0.03  | -0.03 | 0.01  | -0.05 | 0.00  | 0.00  | -0.02 |
| 58 | 1 | 0.04  | -0.01 | 0.04  | -0.04 | 0.01  | -0.06 | 0.00  | 0.00  | -0.03 |
| 59 | 8 | -0.01 | 0.00  | 0.00  | 0.01  | 0.04  | 0.05  | -0.01 | 0.01  | 0.07  |
| 60 | 8 | 0.01  | -0.06 | -0.03 | -0.01 | -0.01 | 0.02  | 0.05  | -0.01 | -0.04 |
| 61 | 8 | 0.01  | 0.01  | -0.01 | -0.01 | 0.02  | 0.03  | -0.02 | 0.02  | 0.03  |
| 62 | 6 | 0.04  | -0.04 | 0.03  | 0.01  | -0.02 | 0.02  | 0.01  | 0.01  | -0.03 |
| 63 | 6 | 0.13  | -0.08 | 0.10  | 0.03  | -0.03 | 0.04  | 0.02  | 0.00  | -0.03 |
| 64 | 6 | 0.14  | -0.09 | 0.12  | 0.04  | -0.04 | 0.04  | 0.01  | 0.02  | -0.01 |
| 65 | 8 | -0.07 | 0.05  | 0.01  | -0.02 | -0.01 | 0.01  | -0.03 | 0.03  | -0.04 |
| 66 | 1 | 0.23  | -0.14 | 0.19  | 0.07  | -0.06 | 0.06  | 0.02  | 0.04  | -0.02 |
| 67 | 6 | -0.09 | 0.04  | -0.09 | -0.03 | 0.01  | -0.03 | -0.01 | 0.01  | 0.01  |
| 68 | 1 | -0.19 | 0.10  | -0.18 | -0.06 | 0.03  | -0.06 | -0.02 | -0.01 | 0.01  |
| 69 | 1 | -0.12 | 0.31  | -0.05 | -0.04 | 0.09  | -0.02 | -0.01 | 0.01  | 0.03  |
| 70 | 1 | -0.20 | -0.14 | -0.26 | -0.06 | -0.05 | -0.09 | 0.00  | 0.02  | 0.03  |
| 71 | 6 | 0.01  | -0.05 | 0.00  | 0.00  | -0.02 | 0.01  | 0.01  | -0.02 | -0.03 |
| 72 | 1 | 0.02  | -0.05 | -0.07 | 0.00  | -0.02 | -0.02 | 0.01  | -0.01 | -0.06 |
| 73 | 1 | -0.09 | -0.02 | 0.05  | -0.03 | -0.03 | 0.02  | 0.00  | -0.04 | -0.03 |
| 74 | 1 | 0.01  | -0.05 | -0.07 | 0.01  | -0.02 | 0.00  | 0.02  | -0.01 | -0.01 |

22

23

24

A

A

A

|                |          |          |          |
|----------------|----------|----------|----------|
| Frequencies -- | 213.3295 | 231.0043 | 233.6059 |
| Red. masses -- | 4.0031   | 4.0642   | 2.7829   |
| Frc consts --  | 0.1073   | 0.1278   | 0.0895   |
| IR Inten --    | 1.1328   | 3.5498   | 2.8837   |
| Raman Activ -- | 0.6416   | 0.8619   | 1.8858   |
| Depolar (P) -- | 0.2495   | 0.4002   | 0.2612   |
| Depolar (U) -- | 0.3994   | 0.5716   | 0.4142   |

| Atom | AN | X     | Y     | Z     | X     | Y    | Z     | X     | Y     | Z     |
|------|----|-------|-------|-------|-------|------|-------|-------|-------|-------|
| 1    | 6  | 0.01  | -0.02 | 0.00  | -0.02 | 0.03 | -0.01 | 0.06  | -0.03 | 0.06  |
| 2    | 6  | 0.02  | -0.02 | -0.02 | -0.04 | 0.02 | 0.01  | -0.01 | 0.02  | 0.03  |
| 3    | 6  | 0.02  | 0.00  | 0.03  | -0.01 | 0.01 | -0.03 | 0.03  | -0.05 | 0.03  |
| 4    | 6  | 0.00  | 0.02  | -0.03 | 0.01  | 0.00 | 0.00  | 0.00  | -0.04 | 0.00  |
| 5    | 6  | 0.01  | 0.00  | -0.08 | 0.00  | 0.02 | 0.06  | -0.01 | -0.03 | 0.01  |
| 6    | 6  | -0.01 | 0.01  | -0.06 | 0.03  | 0.00 | 0.05  | -0.03 | -0.01 | 0.01  |
| 7    | 8  | 0.03  | -0.02 | -0.04 | -0.04 | 0.01 | 0.06  | -0.03 | 0.03  | 0.03  |
| 8    | 6  | -0.01 | 0.01  | -0.02 | -0.01 | 0.00 | 0.01  | 0.05  | -0.02 | 0.05  |
| 9    | 6  | -0.02 | -0.02 | -0.01 | 0.01  | 0.01 | 0.00  | 0.00  | 0.02  | 0.01  |
| 10   | 1  | -0.06 | -0.04 | 0.00  | -0.01 | 0.01 | 0.00  | 0.03  | 0.12  | 0.02  |
| 11   | 8  | 0.03  | -0.02 | 0.04  | 0.03  | 0.00 | 0.01  | -0.08 | 0.02  | -0.08 |
| 12   | 6  | -0.02 | -0.01 | -0.04 | 0.00  | 0.00 | -0.04 | -0.01 | -0.02 | -0.01 |

|    |   |       |       |       |       |       |       |       |       |       |
|----|---|-------|-------|-------|-------|-------|-------|-------|-------|-------|
| 13 | 1 | -0.02 | 0.01  | -0.06 | -0.04 | 0.04  | -0.08 | -0.04 | -0.03 | -0.01 |
| 14 | 6 | -0.04 | 0.01  | 0.07  | 0.06  | -0.03 | -0.08 | -0.06 | 0.05  | 0.00  |
| 15 | 8 | 0.05  | 0.00  | -0.01 | -0.04 | 0.01  | 0.03  | -0.04 | -0.01 | -0.06 |
| 16 | 6 | -0.01 | 0.00  | -0.02 | -0.04 | 0.05  | 0.06  | 0.09  | 0.00  | -0.01 |
| 17 | 1 | -0.01 | -0.03 | -0.03 | -0.02 | 0.20  | 0.14  | 0.06  | 0.28  | 0.05  |
| 18 | 1 | 0.01  | 0.02  | -0.03 | -0.17 | -0.03 | 0.12  | -0.02 | -0.20 | 0.14  |
| 19 | 1 | -0.02 | 0.00  | 0.00  | 0.05  | 0.02  | -0.03 | 0.26  | -0.07 | -0.24 |
| 20 | 6 | -0.01 | -0.01 | -0.02 | -0.01 | 0.01  | 0.00  | 0.05  | -0.02 | 0.07  |
| 21 | 1 | -0.01 | -0.03 | -0.02 | 0.00  | 0.02  | 0.00  | 0.06  | -0.04 | 0.06  |
| 22 | 6 | 0.04  | -0.01 | -0.01 | -0.02 | 0.02  | -0.01 | 0.15  | -0.05 | -0.01 |
| 23 | 1 | -0.01 | -0.09 | -0.04 | 0.01  | 0.08  | -0.01 | 0.06  | -0.13 | -0.14 |
| 24 | 1 | 0.13  | 0.02  | -0.06 | -0.07 | 0.00  | 0.02  | 0.34  | -0.03 | -0.08 |
| 25 | 1 | 0.01  | 0.05  | 0.07  | 0.01  | -0.02 | -0.07 | 0.15  | 0.01  | 0.12  |
| 26 | 6 | 0.01  | 0.00  | -0.07 | 0.00  | 0.01  | 0.04  | 0.01  | -0.01 | -0.01 |
| 27 | 1 | 0.11  | 0.00  | -0.13 | -0.08 | 0.03  | 0.08  | 0.04  | -0.01 | -0.03 |
| 28 | 1 | -0.08 | -0.02 | -0.13 | 0.07  | 0.02  | 0.08  | -0.01 | -0.03 | -0.03 |
| 29 | 6 | -0.01 | 0.01  | 0.02  | -0.03 | -0.01 | -0.02 | -0.01 | -0.03 | -0.02 |
| 30 | 1 | -0.03 | 0.03  | 0.04  | -0.07 | -0.02 | 0.00  | 0.01  | -0.11 | -0.05 |
| 31 | 1 | -0.01 | 0.01  | 0.00  | -0.04 | 0.00  | -0.08 | -0.03 | 0.00  | -0.01 |
| 32 | 6 | 0.01  | 0.01  | -0.02 | -0.02 | -0.02 | 0.02  | 0.00  | 0.00  | 0.03  |
| 33 | 1 | 0.00  | 0.03  | -0.02 | 0.00  | -0.05 | 0.03  | -0.02 | 0.00  | 0.02  |
| 34 | 6 | 0.04  | -0.01 | -0.01 | -0.07 | 0.01  | 0.00  | -0.06 | 0.04  | 0.00  |
| 35 | 1 | 0.05  | -0.01 | 0.00  | -0.08 | 0.02  | -0.01 | -0.13 | 0.09  | -0.04 |
| 36 | 6 | -0.02 | 0.09  | -0.02 | 0.07  | -0.02 | -0.02 | 0.04  | -0.09 | -0.02 |
| 37 | 1 | 0.05  | 0.16  | -0.09 | 0.11  | -0.03 | 0.01  | 0.25  | -0.02 | -0.01 |
| 38 | 1 | -0.09 | 0.16  | 0.05  | 0.08  | -0.02 | -0.02 | -0.12 | 0.02  | 0.01  |
| 39 | 1 | -0.03 | 0.01  | -0.01 | 0.07  | -0.04 | -0.07 | 0.02  | -0.32 | -0.08 |
| 40 | 6 | 0.02  | -0.02 | 0.07  | -0.01 | 0.03  | -0.08 | 0.02  | -0.02 | 0.01  |
| 41 | 1 | 0.04  | -0.09 | 0.16  | -0.03 | 0.08  | -0.14 | 0.00  | -0.03 | 0.01  |
| 42 | 6 | -0.12 | 0.02  | -0.09 | 0.12  | 0.00  | 0.08  | -0.06 | 0.05  | 0.03  |
| 43 | 1 | -0.18 | 0.02  | -0.04 | 0.14  | 0.03  | 0.04  | -0.08 | 0.08  | 0.03  |
| 44 | 1 | -0.14 | 0.02  | -0.08 | 0.18  | 0.00  | 0.08  | -0.07 | 0.05  | 0.08  |
| 45 | 1 | -0.14 | 0.03  | -0.18 | 0.12  | -0.05 | 0.13  | -0.07 | 0.07  | -0.01 |
| 46 | 6 | 0.04  | -0.01 | -0.04 | -0.03 | 0.03  | 0.02  | 0.02  | -0.01 | 0.00  |
| 47 | 1 | 0.06  | -0.03 | -0.02 | -0.05 | 0.07  | -0.01 | 0.04  | -0.01 | -0.01 |
| 48 | 6 | 0.04  | 0.02  | -0.02 | -0.04 | -0.03 | 0.02  | 0.02  | 0.03  | 0.00  |
| 49 | 1 | 0.06  | 0.06  | -0.01 | -0.06 | -0.10 | 0.03  | 0.03  | 0.07  | 0.00  |
| 50 | 1 | 0.05  | 0.00  | -0.04 | -0.09 | 0.00  | 0.05  | 0.04  | 0.01  | -0.01 |
| 51 | 6 | 0.00  | 0.01  | 0.02  | 0.02  | -0.02 | -0.03 | -0.04 | 0.03  | 0.01  |
| 52 | 1 | 0.04  | 0.02  | 0.05  | -0.01 | -0.04 | -0.06 | -0.06 | 0.05  | 0.02  |
| 53 | 6 | -0.01 | 0.01  | 0.05  | 0.02  | -0.02 | -0.06 | -0.04 | 0.03  | 0.00  |
| 54 | 1 | -0.01 | 0.01  | 0.06  | 0.02  | -0.03 | -0.08 | -0.02 | 0.04  | 0.02  |
| 55 | 6 | 0.05  | 0.00  | 0.00  | -0.05 | 0.01  | 0.02  | -0.01 | -0.01 | -0.04 |
| 56 | 1 | 0.09  | -0.01 | -0.05 | -0.11 | 0.03  | 0.07  | 0.02  | -0.04 | -0.06 |
| 57 | 6 | -0.01 | 0.01  | 0.05  | 0.04  | -0.02 | -0.05 | -0.08 | 0.03  | -0.03 |
| 58 | 1 | 0.00  | 0.01  | 0.05  | 0.05  | -0.02 | -0.04 | -0.10 | 0.03  | -0.06 |
| 59 | 8 | -0.02 | 0.08  | 0.12  | 0.02  | -0.05 | -0.11 | 0.02  | -0.05 | 0.02  |
| 60 | 8 | -0.06 | -0.04 | -0.03 | 0.07  | -0.07 | -0.10 | 0.01  | -0.01 | -0.02 |
| 61 | 8 | 0.02  | -0.02 | -0.08 | 0.02  | 0.06  | 0.08  | -0.01 | 0.00  | 0.02  |
| 62 | 6 | -0.05 | -0.01 | 0.06  | -0.02 | 0.01  | 0.01  | 0.00  | 0.02  | -0.01 |
| 63 | 6 | -0.11 | -0.02 | 0.10  | -0.11 | -0.02 | 0.07  | -0.03 | 0.03  | -0.02 |
| 64 | 6 | -0.07 | -0.10 | 0.04  | -0.09 | -0.08 | 0.01  | -0.03 | 0.04  | -0.03 |

|    |   |       |       |       |       |       |       |       |       |       |
|----|---|-------|-------|-------|-------|-------|-------|-------|-------|-------|
| 65 | 8 | 0.12  | 0.04  | 0.09  | 0.11  | 0.12  | 0.03  | 0.03  | 0.03  | 0.00  |
| 66 | 1 | -0.12 | -0.21 | 0.04  | -0.16 | -0.17 | -0.01 | -0.05 | 0.05  | -0.04 |
| 67 | 6 | 0.07  | -0.07 | -0.12 | 0.09  | -0.07 | -0.12 | 0.03  | 0.01  | 0.02  |
| 68 | 1 | 0.15  | 0.08  | -0.10 | 0.18  | 0.08  | -0.08 | 0.06  | 0.00  | 0.04  |
| 69 | 1 | 0.10  | -0.11 | -0.21 | 0.13  | -0.16 | -0.21 | 0.04  | -0.06 | 0.00  |
| 70 | 1 | 0.07  | -0.14 | -0.20 | 0.12  | -0.12 | -0.17 | 0.06  | 0.05  | 0.06  |
| 71 | 6 | -0.08 | 0.05  | 0.12  | -0.09 | -0.01 | 0.09  | 0.00  | 0.04  | 0.00  |
| 72 | 1 | -0.04 | -0.03 | 0.24  | -0.04 | -0.09 | 0.18  | 0.00  | 0.04  | 0.03  |
| 73 | 1 | -0.02 | 0.22  | 0.12  | -0.04 | 0.12  | 0.09  | 0.02  | 0.06  | -0.01 |
| 74 | 1 | -0.16 | 0.03  | -0.01 | -0.17 | -0.03 | 0.01  | -0.01 | 0.04  | -0.01 |

|                |    |          |       |       |          |       |       |          |       |       |
|----------------|----|----------|-------|-------|----------|-------|-------|----------|-------|-------|
|                |    | 25       |       |       | 26       |       |       | 27       |       |       |
|                |    | A        |       |       | A        |       |       | A        |       |       |
| Frequencies -- |    | 236.0090 |       |       | 255.9978 |       |       | 261.9659 |       |       |
| Red. masses -- |    | 3.0995   |       |       | 2.6410   |       |       | 2.9252   |       |       |
| Frc consts --  |    | 0.1017   |       |       | 0.1020   |       |       | 0.1183   |       |       |
| IR Inten --    |    | 2.7079   |       |       | 1.2634   |       |       | 3.7322   |       |       |
| Raman Activ -- |    | 0.8405   |       |       | 1.2407   |       |       | 1.5100   |       |       |
| Depolar (P) -- |    | 0.2101   |       |       | 0.7376   |       |       | 0.7083   |       |       |
| Depolar (U) -- |    | 0.3473   |       |       | 0.8490   |       |       | 0.8292   |       |       |
| Atom           | AN | X        | Y     | Z     | X        | Y     | Z     | X        | Y     | Z     |
| 1              | 6  | -0.01    | 0.02  | -0.02 | -0.01    | 0.01  | -0.02 | -0.04    | 0.06  | -0.06 |
| 2              | 6  | -0.07    | 0.01  | 0.00  | -0.03    | 0.01  | -0.04 | -0.06    | 0.02  | 0.02  |
| 3              | 6  | 0.02     | 0.02  | -0.01 | 0.00     | -0.01 | 0.02  | -0.02    | 0.03  | -0.02 |
| 4              | 6  | 0.02     | 0.02  | -0.01 | -0.02    | -0.01 | 0.03  | -0.01    | 0.00  | -0.01 |
| 5              | 6  | 0.03     | 0.05  | -0.08 | -0.03    | -0.05 | 0.04  | -0.02    | -0.04 | 0.03  |
| 6              | 6  | 0.01     | 0.03  | -0.06 | -0.02    | -0.03 | 0.03  | -0.01    | -0.02 | 0.02  |
| 7              | 8  | -0.02    | -0.02 | 0.09  | 0.03     | -0.02 | -0.03 | -0.03    | 0.00  | 0.16  |
| 8              | 6  | -0.02    | -0.01 | 0.01  | 0.04     | -0.05 | 0.01  | 0.02     | 0.01  | 0.00  |
| 9              | 6  | 0.03     | -0.01 | 0.02  | 0.02     | -0.04 | -0.02 | -0.02    | 0.03  | -0.02 |
| 10             | 1  | 0.01     | -0.06 | 0.02  | 0.01     | -0.07 | -0.02 | -0.06    | -0.02 | -0.01 |
| 11             | 8  | 0.11     | -0.03 | 0.06  | 0.07     | -0.06 | 0.00  | 0.05     | 0.02  | 0.05  |
| 12             | 6  | 0.05     | 0.02  | 0.03  | 0.01     | -0.02 | 0.00  | -0.04    | 0.02  | -0.02 |
| 13             | 1  | 0.05     | 0.01  | 0.04  | 0.04     | -0.01 | 0.00  | -0.04    | 0.01  | -0.01 |
| 14             | 6  | -0.02    | -0.01 | 0.03  | -0.03    | -0.01 | 0.03  | 0.00     | -0.02 | 0.00  |
| 15             | 8  | 0.03     | 0.00  | 0.00  | 0.02     | 0.00  | 0.00  | 0.01     | 0.01  | 0.01  |
| 16             | 6  | -0.08    | 0.11  | 0.12  | 0.02     | 0.07  | 0.07  | 0.06     | 0.02  | -0.04 |
| 17             | 1  | -0.04    | 0.36  | 0.28  | 0.03     | 0.07  | 0.08  | 0.02     | -0.02 | -0.12 |
| 18             | 1  | -0.32    | 0.00  | 0.21  | -0.04    | 0.15  | 0.01  | 0.12     | 0.09  | -0.09 |
| 19             | 1  | 0.09     | 0.08  | 0.01  | 0.08     | 0.10  | 0.16  | 0.08     | 0.05  | 0.03  |
| 20             | 6  | -0.02    | 0.01  | -0.01 | 0.00     | -0.02 | -0.04 | -0.01    | 0.06  | -0.04 |
| 21             | 1  | -0.02    | 0.03  | 0.00  | 0.03     | 0.00  | -0.05 | 0.03     | 0.08  | -0.07 |
| 22             | 6  | 0.06     | -0.01 | -0.08 | 0.04     | 0.13  | 0.01  | 0.04     | -0.02 | -0.18 |
| 23             | 1  | 0.05     | 0.03  | -0.16 | 0.06     | 0.16  | 0.03  | 0.09     | 0.18  | -0.26 |
| 24             | 1  | 0.09     | -0.04 | -0.06 | 0.00     | 0.22  | -0.05 | -0.05    | -0.15 | -0.04 |
| 25             | 1  | 0.10     | -0.04 | -0.09 | 0.10     | 0.12  | 0.09  | 0.15     | -0.17 | -0.35 |
| 26             | 6  | 0.02     | 0.03  | 0.04  | -0.01    | -0.03 | -0.02 | -0.02    | -0.02 | -0.05 |
| 27             | 1  | -0.03    | -0.04 | 0.11  | 0.03     | 0.00  | -0.06 | 0.05     | 0.02  | -0.11 |
| 28             | 1  | 0.08     | 0.11  | 0.10  | -0.04    | -0.07 | -0.05 | -0.08    | -0.08 | -0.10 |
| 29             | 6  | -0.05    | -0.03 | -0.03 | 0.01     | -0.06 | -0.03 | 0.09     | 0.04  | 0.05  |
| 30             | 1  | -0.16    | -0.05 | 0.04  | -0.04    | -0.09 | -0.01 | 0.16     | 0.11  | 0.03  |
| 31             | 1  | -0.07    | -0.02 | -0.16 | 0.00     | -0.05 | -0.09 | 0.12     | -0.01 | 0.14  |
| 32             | 6  | -0.02    | -0.05 | 0.03  | 0.04     | -0.04 | 0.00  | 0.00     | -0.05 | 0.04  |

|    |   |       |       |       |       |       |       |       |       |       |
|----|---|-------|-------|-------|-------|-------|-------|-------|-------|-------|
| 33 | 1 | 0.02  | -0.10 | 0.05  | 0.08  | -0.07 | 0.03  | 0.05  | -0.13 | 0.06  |
| 34 | 6 | -0.11 | 0.02  | -0.03 | -0.10 | 0.07  | -0.09 | -0.02 | -0.05 | 0.04  |
| 35 | 1 | -0.14 | 0.03  | -0.04 | -0.16 | 0.11  | -0.13 | 0.04  | -0.09 | 0.08  |
| 36 | 6 | -0.03 | -0.03 | 0.00  | -0.06 | 0.06  | 0.05  | 0.05  | -0.03 | -0.03 |
| 37 | 1 | 0.06  | 0.00  | 0.00  | -0.35 | -0.03 | 0.04  | 0.24  | 0.03  | -0.03 |
| 38 | 1 | -0.13 | 0.01  | -0.02 | 0.14  | -0.08 | 0.01  | -0.07 | 0.06  | 0.01  |
| 39 | 1 | -0.04 | -0.15 | 0.01  | -0.03 | 0.36  | 0.13  | 0.03  | -0.22 | -0.09 |
| 40 | 6 | 0.02  | 0.04  | -0.02 | 0.00  | -0.01 | 0.01  | -0.02 | -0.01 | 0.02  |
| 41 | 1 | 0.00  | 0.06  | -0.04 | 0.01  | 0.00  | 0.00  | 0.00  | -0.03 | 0.05  |
| 42 | 6 | -0.07 | -0.04 | -0.12 | 0.00  | 0.05  | 0.07  | 0.01  | 0.02  | 0.04  |
| 43 | 1 | -0.05 | -0.16 | -0.07 | -0.01 | 0.12  | 0.03  | -0.02 | 0.09  | 0.03  |
| 44 | 1 | -0.17 | -0.05 | -0.20 | 0.03  | 0.05  | 0.14  | 0.07  | 0.03  | 0.09  |
| 45 | 1 | -0.05 | 0.03  | -0.12 | -0.01 | 0.04  | 0.05  | -0.01 | -0.02 | 0.02  |
| 46 | 6 | 0.01  | 0.01  | -0.02 | -0.02 | -0.04 | 0.02  | 0.00  | -0.04 | 0.02  |
| 47 | 1 | 0.00  | 0.00  | 0.00  | -0.01 | -0.07 | 0.05  | 0.00  | -0.05 | 0.03  |
| 48 | 6 | -0.03 | -0.03 | 0.05  | 0.06  | 0.04  | -0.09 | 0.06  | 0.02  | -0.08 |
| 49 | 1 | -0.01 | -0.11 | 0.11  | 0.03  | 0.22  | -0.21 | 0.02  | 0.16  | -0.18 |
| 50 | 1 | -0.13 | 0.02  | 0.08  | 0.24  | -0.05 | -0.17 | 0.21  | -0.05 | -0.14 |
| 51 | 6 | 0.01  | -0.01 | 0.00  | -0.02 | 0.01  | 0.01  | 0.00  | 0.00  | 0.00  |
| 52 | 1 | 0.05  | -0.05 | -0.01 | -0.02 | 0.08  | 0.07  | -0.01 | 0.05  | 0.04  |
| 53 | 6 | -0.01 | -0.01 | 0.02  | -0.02 | 0.00  | 0.01  | -0.01 | -0.01 | -0.01 |
| 54 | 1 | -0.02 | -0.01 | 0.02  | -0.03 | -0.01 | 0.01  | -0.02 | -0.02 | -0.02 |
| 55 | 6 | 0.02  | 0.00  | -0.01 | 0.01  | 0.00  | -0.01 | 0.00  | 0.01  | 0.00  |
| 56 | 1 | 0.04  | 0.00  | -0.03 | 0.03  | 0.01  | -0.04 | -0.01 | 0.02  | -0.01 |
| 57 | 6 | 0.00  | 0.00  | 0.03  | -0.01 | 0.00  | 0.02  | 0.01  | -0.01 | 0.01  |
| 58 | 1 | 0.01  | -0.01 | 0.04  | 0.00  | 0.00  | 0.03  | 0.02  | -0.02 | 0.02  |
| 59 | 8 | 0.04  | 0.00  | -0.03 | 0.01  | -0.03 | 0.00  | -0.01 | 0.05  | 0.02  |
| 60 | 8 | 0.02  | 0.01  | 0.04  | 0.03  | -0.01 | -0.01 | -0.07 | 0.02  | 0.00  |
| 61 | 8 | 0.04  | -0.02 | -0.08 | -0.08 | -0.05 | 0.02  | -0.03 | -0.04 | 0.03  |
| 62 | 6 | 0.00  | -0.01 | 0.01  | 0.00  | 0.01  | -0.01 | -0.02 | 0.00  | -0.01 |
| 63 | 6 | 0.02  | 0.00  | -0.01 | -0.01 | 0.01  | -0.01 | 0.02  | -0.02 | 0.01  |
| 64 | 6 | 0.01  | 0.01  | -0.01 | -0.01 | 0.02  | -0.01 | 0.03  | -0.03 | 0.03  |
| 65 | 8 | -0.03 | -0.04 | 0.00  | 0.00  | 0.02  | -0.01 | -0.01 | -0.01 | 0.00  |
| 66 | 1 | 0.02  | 0.03  | 0.00  | -0.02 | 0.02  | -0.02 | 0.05  | -0.03 | 0.04  |
| 67 | 6 | -0.02 | 0.01  | 0.02  | 0.02  | 0.00  | 0.00  | -0.02 | 0.00  | -0.01 |
| 68 | 1 | -0.03 | -0.02 | 0.02  | 0.03  | 0.01  | 0.01  | -0.05 | 0.00  | -0.03 |
| 69 | 1 | -0.02 | 0.02  | 0.04  | 0.02  | -0.03 | -0.01 | -0.03 | 0.06  | 0.00  |
| 70 | 1 | -0.02 | 0.02  | 0.04  | 0.03  | 0.02  | 0.02  | -0.05 | -0.04 | -0.04 |
| 71 | 6 | 0.01  | -0.01 | -0.02 | -0.01 | 0.00  | -0.01 | 0.01  | -0.02 | 0.00  |
| 72 | 1 | 0.00  | 0.01  | -0.04 | -0.01 | 0.00  | -0.01 | 0.00  | -0.01 | -0.01 |
| 73 | 1 | 0.00  | -0.04 | -0.02 | -0.01 | 0.00  | -0.01 | 0.00  | -0.04 | 0.00  |
| 74 | 1 | 0.03  | 0.00  | 0.01  | -0.02 | 0.00  | -0.01 | 0.02  | -0.02 | 0.02  |

|                |          |   |   |    |          |   |    |          |   |
|----------------|----------|---|---|----|----------|---|----|----------|---|
|                | 28       |   |   | 29 |          |   | 30 |          |   |
|                | A        |   |   | A  |          |   | A  |          |   |
| Frequencies -- | 266.7847 |   |   |    | 273.3051 |   |    | 284.1968 |   |
| Red. masses -- | 3.6000   |   |   |    | 2.9346   |   |    | 2.6795   |   |
| Frc consts --  | 0.1510   |   |   |    | 0.1292   |   |    | 0.1275   |   |
| IR Inten --    | 2.0513   |   |   |    | 0.2297   |   |    | 0.3323   |   |
| Raman Activ -- | 0.5285   |   |   |    | 1.3514   |   |    | 0.3686   |   |
| Depolar (P) -- | 0.6458   |   |   |    | 0.7488   |   |    | 0.7500   |   |
| Depolar (U) -- | 0.7848   |   |   |    | 0.8564   |   |    | 0.8571   |   |
| Atom AN        | X        | Y | Z | X  | Y        | Z | X  | Y        | Z |

|    |   |       |       |       |       |       |       |       |       |       |
|----|---|-------|-------|-------|-------|-------|-------|-------|-------|-------|
| 1  | 6 | -0.01 | 0.01  | 0.00  | -0.05 | 0.00  | -0.02 | -0.01 | 0.02  | 0.00  |
| 2  | 6 | 0.01  | 0.02  | 0.01  | -0.02 | 0.01  | -0.02 | 0.03  | 0.03  | 0.00  |
| 3  | 6 | -0.01 | 0.00  | -0.04 | -0.07 | -0.01 | -0.03 | -0.03 | 0.05  | -0.02 |
| 4  | 6 | 0.05  | -0.02 | -0.04 | -0.03 | -0.01 | -0.04 | 0.01  | 0.02  | 0.01  |
| 5  | 6 | 0.04  | -0.06 | 0.00  | -0.02 | 0.02  | -0.02 | -0.01 | 0.00  | 0.02  |
| 6  | 6 | -0.03 | -0.06 | 0.02  | 0.01  | 0.00  | -0.02 | -0.01 | 0.01  | 0.01  |
| 7  | 8 | -0.01 | 0.03  | 0.01  | 0.05  | -0.02 | -0.02 | 0.04  | 0.02  | 0.00  |
| 8  | 6 | -0.01 | 0.02  | -0.02 | 0.07  | -0.03 | 0.03  | 0.01  | 0.02  | -0.03 |
| 9  | 6 | 0.05  | 0.02  | 0.00  | -0.01 | -0.02 | -0.01 | 0.07  | 0.03  | 0.01  |
| 10 | 1 | 0.05  | -0.01 | -0.01 | -0.02 | -0.01 | 0.00  | 0.12  | 0.05  | -0.01 |
| 11 | 8 | 0.11  | 0.00  | 0.03  | 0.00  | -0.03 | -0.01 | 0.03  | 0.03  | -0.06 |
| 12 | 6 | 0.04  | 0.00  | 0.02  | -0.01 | -0.02 | -0.01 | 0.06  | 0.02  | 0.05  |
| 13 | 1 | 0.04  | -0.02 | 0.04  | 0.00  | -0.03 | 0.01  | 0.06  | 0.02  | 0.04  |
| 14 | 6 | -0.07 | 0.05  | -0.02 | 0.06  | 0.01  | -0.01 | -0.04 | -0.05 | 0.04  |
| 15 | 8 | -0.07 | -0.01 | -0.09 | 0.02  | 0.00  | 0.05  | 0.04  | 0.01  | 0.01  |
| 16 | 6 | -0.05 | 0.04  | 0.04  | 0.14  | 0.06  | -0.04 | -0.02 | -0.01 | -0.01 |
| 17 | 1 | -0.02 | 0.09  | 0.11  | 0.08  | 0.22  | -0.08 | 0.01  | 0.13  | 0.08  |
| 18 | 1 | -0.14 | 0.00  | 0.06  | 0.11  | 0.00  | 0.01  | -0.12 | -0.15 | 0.10  |
| 19 | 1 | -0.04 | 0.03  | 0.00  | 0.30  | 0.04  | -0.11 | 0.01  | -0.06 | -0.17 |
| 20 | 6 | 0.00  | 0.02  | -0.01 | 0.02  | -0.02 | 0.00  | 0.03  | 0.02  | 0.01  |
| 21 | 1 | -0.02 | 0.03  | 0.01  | 0.07  | 0.00  | -0.04 | 0.01  | 0.04  | 0.04  |
| 22 | 6 | -0.07 | 0.05  | 0.06  | -0.03 | 0.12  | 0.03  | -0.11 | -0.04 | 0.03  |
| 23 | 1 | -0.03 | 0.06  | 0.14  | 0.00  | 0.15  | 0.04  | -0.17 | -0.20 | 0.04  |
| 24 | 1 | -0.14 | 0.06  | 0.07  | -0.04 | 0.21  | -0.05 | 0.01  | -0.03 | -0.01 |
| 25 | 1 | -0.08 | 0.05  | 0.04  | 0.03  | 0.12  | 0.12  | -0.23 | 0.08  | 0.08  |
| 26 | 6 | -0.04 | -0.06 | -0.05 | -0.06 | -0.01 | -0.04 | -0.04 | 0.01  | 0.03  |
| 27 | 1 | 0.04  | 0.00  | -0.13 | -0.02 | 0.05  | -0.09 | -0.07 | 0.01  | 0.04  |
| 28 | 1 | -0.12 | -0.13 | -0.12 | -0.14 | -0.02 | -0.09 | -0.02 | 0.03  | 0.05  |
| 29 | 6 | 0.00  | 0.01  | -0.03 | 0.01  | -0.04 | 0.00  | -0.03 | 0.00  | -0.08 |
| 30 | 1 | -0.07 | 0.02  | 0.02  | 0.01  | -0.08 | -0.01 | -0.08 | -0.04 | -0.05 |
| 31 | 1 | -0.01 | 0.00  | -0.11 | 0.00  | 0.00  | -0.01 | -0.04 | 0.02  | -0.15 |
| 32 | 6 | 0.00  | 0.01  | -0.02 | 0.05  | -0.02 | 0.03  | 0.03  | 0.02  | -0.02 |
| 33 | 1 | -0.02 | 0.02  | -0.03 | 0.09  | -0.06 | 0.05  | 0.04  | 0.01  | -0.02 |
| 34 | 6 | 0.00  | 0.01  | 0.00  | -0.05 | 0.06  | -0.04 | 0.05  | 0.00  | 0.01  |
| 35 | 1 | -0.02 | 0.01  | 0.00  | -0.08 | 0.09  | -0.07 | 0.07  | -0.03 | 0.03  |
| 36 | 6 | 0.18  | -0.05 | -0.07 | -0.06 | -0.08 | -0.04 | 0.00  | -0.08 | 0.01  |
| 37 | 1 | -0.01 | -0.18 | 0.02  | 0.13  | -0.01 | -0.04 | 0.24  | 0.00  | 0.02  |
| 38 | 1 | 0.43  | -0.21 | -0.10 | -0.23 | 0.03  | -0.04 | -0.22 | 0.04  | 0.01  |
| 39 | 1 | 0.22  | 0.22  | -0.15 | -0.08 | -0.29 | -0.05 | -0.03 | -0.36 | -0.02 |
| 40 | 6 | -0.03 | -0.05 | 0.04  | -0.08 | -0.05 | 0.04  | -0.04 | 0.03  | 0.01  |
| 41 | 1 | -0.02 | -0.12 | 0.12  | -0.07 | -0.12 | 0.11  | -0.03 | 0.01  | 0.03  |
| 42 | 6 | -0.02 | -0.02 | 0.04  | 0.08  | -0.05 | -0.02 | 0.03  | -0.04 | 0.00  |
| 43 | 1 | -0.09 | 0.10  | 0.04  | 0.04  | 0.03  | -0.02 | 0.05  | -0.07 | -0.01 |
| 44 | 1 | 0.11  | -0.01 | 0.11  | 0.23  | -0.04 | -0.04 | 0.04  | -0.05 | -0.05 |
| 45 | 1 | -0.06 | -0.13 | -0.01 | 0.05  | -0.19 | 0.00  | 0.04  | -0.07 | 0.05  |
| 46 | 6 | 0.09  | -0.01 | -0.04 | -0.01 | 0.03  | -0.02 | -0.04 | -0.04 | 0.05  |
| 47 | 1 | 0.13  | 0.02  | -0.12 | 0.00  | 0.04  | -0.05 | -0.07 | -0.07 | 0.12  |
| 48 | 6 | 0.04  | -0.02 | 0.03  | -0.06 | -0.03 | 0.07  | 0.03  | 0.03  | -0.08 |
| 49 | 1 | 0.09  | -0.02 | 0.09  | -0.04 | -0.19 | 0.16  | -0.02 | 0.19  | -0.21 |
| 50 | 1 | 0.00  | 0.00  | 0.05  | -0.21 | 0.05  | 0.14  | 0.22  | -0.06 | -0.15 |
| 51 | 6 | -0.04 | 0.00  | 0.00  | 0.02  | -0.01 | -0.01 | -0.01 | 0.00  | 0.01  |
| 52 | 1 | -0.07 | 0.01  | -0.01 | 0.02  | -0.06 | -0.05 | 0.03  | 0.05  | 0.06  |



|    |   |       |       |       |       |       |       |       |       |       |
|----|---|-------|-------|-------|-------|-------|-------|-------|-------|-------|
| 53 | 6 | -0.06 | 0.03  | -0.03 | 0.06  | 0.00  | 0.01  | -0.05 | -0.03 | 0.00  |
| 54 | 1 | -0.05 | 0.04  | -0.01 | 0.08  | 0.00  | 0.02  | -0.09 | -0.04 | -0.02 |
| 55 | 6 | -0.04 | -0.01 | -0.07 | 0.02  | 0.00  | 0.05  | 0.00  | 0.01  | -0.03 |
| 56 | 1 | -0.01 | -0.05 | -0.08 | -0.01 | 0.00  | 0.09  | 0.02  | 0.04  | -0.07 |
| 57 | 6 | -0.10 | 0.02  | -0.06 | 0.05  | 0.01  | 0.00  | 0.00  | -0.03 | 0.06  |
| 58 | 1 | -0.13 | 0.03  | -0.09 | 0.05  | 0.01  | 0.00  | 0.03  | -0.04 | 0.09  |
| 59 | 8 | -0.05 | 0.08  | 0.07  | -0.10 | 0.06  | 0.06  | -0.05 | 0.08  | 0.02  |
| 60 | 8 | 0.01  | 0.01  | 0.05  | -0.03 | 0.01  | 0.02  | 0.10  | 0.00  | 0.03  |
| 61 | 8 | 0.13  | 0.02  | 0.05  | 0.01  | 0.04  | -0.01 | -0.06 | -0.07 | -0.02 |
| 62 | 6 | -0.01 | -0.02 | 0.02  | -0.01 | -0.01 | 0.01  | 0.03  | 0.01  | 0.01  |
| 63 | 6 | 0.00  | -0.01 | 0.00  | 0.00  | 0.00  | 0.00  | -0.01 | 0.01  | 0.00  |
| 64 | 6 | 0.00  | -0.01 | 0.00  | 0.00  | 0.00  | 0.00  | -0.03 | 0.02  | -0.01 |
| 65 | 8 | -0.02 | -0.05 | 0.02  | -0.01 | -0.02 | 0.01  | -0.01 | 0.01  | 0.00  |
| 66 | 1 | 0.01  | -0.01 | 0.01  | 0.01  | 0.00  | 0.00  | -0.05 | 0.01  | -0.03 |
| 67 | 6 | -0.02 | -0.01 | 0.01  | -0.01 | 0.00  | 0.01  | 0.05  | 0.01  | -0.02 |
| 68 | 1 | -0.03 | -0.02 | 0.00  | -0.02 | -0.01 | 0.01  | 0.08  | 0.04  | 0.00  |
| 69 | 1 | -0.02 | 0.00  | 0.01  | -0.01 | 0.01  | 0.02  | 0.06  | -0.05 | -0.05 |
| 70 | 1 | -0.02 | -0.01 | 0.01  | -0.01 | 0.00  | 0.01  | 0.07  | 0.02  | -0.02 |
| 71 | 6 | 0.00  | 0.00  | 0.01  | 0.01  | 0.02  | 0.00  | -0.04 | -0.06 | -0.01 |
| 72 | 1 | 0.00  | 0.00  | 0.02  | 0.00  | 0.02  | 0.01  | 0.00  | -0.11 | -0.04 |
| 73 | 1 | 0.01  | 0.02  | 0.01  | 0.01  | 0.03  | 0.00  | -0.05 | -0.06 | 0.00  |
| 74 | 1 | 0.00  | 0.00  | -0.01 | 0.01  | 0.02  | -0.01 | -0.09 | -0.08 | 0.01  |

|                |  |          |  |          |  |          |
|----------------|--|----------|--|----------|--|----------|
|                |  | 31       |  | 32       |  | 33       |
|                |  | A        |  | A        |  | A        |
| Frequencies -- |  | 292.5305 |  | 297.2987 |  | 303.2679 |
| Red. masses -- |  | 2.3890   |  | 1.5186   |  | 1.4858   |
| Frc consts --  |  | 0.1205   |  | 0.0791   |  | 0.0805   |
| IR Inten --    |  | 2.3003   |  | 0.2628   |  | 0.2706   |
| Raman Activ -- |  | 0.9255   |  | 0.7062   |  | 0.2252   |
| Depolar (P) -- |  | 0.7417   |  | 0.5957   |  | 0.6361   |
| Depolar (U) -- |  | 0.8517   |  | 0.7466   |  | 0.7776   |

| Atom | AN | X     | Y     | Z     | X     | Y     | Z     | X     | Y     | Z     |
|------|----|-------|-------|-------|-------|-------|-------|-------|-------|-------|
| 1    | 6  | 0.01  | -0.02 | 0.03  | 0.01  | 0.00  | 0.01  | -0.02 | -0.01 | -0.01 |
| 2    | 6  | 0.01  | 0.00  | 0.00  | 0.00  | 0.00  | 0.00  | -0.02 | -0.01 | 0.00  |
| 3    | 6  | 0.00  | 0.03  | -0.01 | 0.01  | 0.02  | 0.01  | -0.02 | 0.01  | 0.00  |
| 4    | 6  | 0.01  | 0.03  | 0.00  | 0.00  | 0.02  | 0.02  | 0.00  | 0.02  | 0.00  |
| 5    | 6  | 0.00  | -0.01 | 0.04  | -0.01 | 0.00  | 0.01  | 0.00  | 0.01  | 0.00  |
| 6    | 6  | -0.01 | -0.01 | 0.03  | 0.00  | -0.01 | 0.00  | 0.00  | 0.01  | -0.01 |
| 7    | 8  | 0.02  | -0.01 | -0.04 | 0.00  | 0.00  | 0.00  | 0.01  | -0.03 | 0.01  |
| 8    | 6  | 0.02  | -0.02 | 0.01  | 0.00  | 0.00  | 0.00  | 0.01  | 0.01  | 0.02  |
| 9    | 6  | -0.02 | 0.00  | 0.00  | 0.00  | 0.00  | 0.00  | -0.01 | 0.00  | 0.02  |
| 10   | 1  | -0.08 | 0.01  | 0.03  | 0.00  | 0.01  | 0.01  | 0.01  | 0.02  | 0.02  |
| 11   | 8  | 0.07  | -0.04 | 0.05  | 0.01  | 0.00  | 0.00  | -0.04 | 0.01  | 0.01  |
| 12   | 6  | -0.03 | 0.02  | -0.04 | 0.00  | 0.01  | 0.00  | 0.00  | 0.01  | 0.01  |
| 13   | 1  | -0.02 | 0.03  | -0.04 | 0.00  | 0.02  | -0.01 | 0.00  | 0.01  | 0.02  |
| 14   | 6  | 0.03  | -0.02 | -0.03 | -0.04 | 0.02  | 0.04  | 0.00  | -0.02 | 0.01  |
| 15   | 8  | -0.01 | 0.00  | 0.01  | 0.01  | 0.00  | -0.02 | 0.01  | 0.00  | 0.01  |
| 16   | 6  | 0.06  | 0.01  | -0.03 | -0.01 | -0.01 | 0.00  | 0.06  | 0.01  | -0.04 |
| 17   | 1  | 0.03  | 0.17  | -0.01 | 0.00  | 0.01  | 0.01  | 0.02  | 0.13  | -0.05 |
| 18   | 1  | 0.00  | -0.09 | 0.05  | -0.02 | -0.03 | 0.01  | 0.05  | -0.08 | 0.03  |
| 19   | 1  | 0.15  | -0.02 | -0.15 | -0.01 | -0.02 | -0.03 | 0.14  | -0.02 | -0.14 |
| 20   | 6  | 0.02  | -0.03 | 0.03  | 0.01  | 0.00  | 0.01  | 0.01  | -0.01 | 0.03  |

|    |   |       |       |       |       |       |       |       |       |       |
|----|---|-------|-------|-------|-------|-------|-------|-------|-------|-------|
| 21 | 1 | 0.03  | -0.05 | 0.01  | 0.00  | 0.00  | 0.01  | 0.02  | 0.01  | 0.02  |
| 22 | 6 | -0.03 | -0.03 | 0.05  | 0.01  | -0.04 | -0.02 | 0.04  | -0.05 | -0.07 |
| 23 | 1 | -0.09 | -0.15 | 0.05  | -0.02 | -0.09 | -0.05 | -0.10 | -0.25 | -0.20 |
| 24 | 1 | 0.08  | 0.02  | -0.01 | 0.08  | -0.05 | -0.03 | 0.30  | -0.01 | -0.18 |
| 25 | 1 | -0.11 | 0.07  | 0.14  | -0.02 | 0.00  | 0.00  | -0.03 | 0.08  | 0.11  |
| 26 | 6 | 0.00  | 0.00  | 0.00  | 0.01  | -0.01 | -0.04 | -0.03 | 0.02  | -0.01 |
| 27 | 1 | -0.04 | 0.02  | 0.01  | 0.03  | 0.02  | -0.07 | -0.04 | 0.02  | 0.00  |
| 28 | 1 | 0.05  | -0.03 | 0.01  | 0.01  | -0.06 | -0.06 | -0.01 | 0.02  | 0.00  |
| 29 | 6 | -0.06 | -0.03 | -0.02 | -0.01 | 0.00  | -0.01 | -0.02 | 0.01  | 0.02  |
| 30 | 1 | -0.17 | -0.09 | 0.05  | -0.03 | -0.01 | 0.00  | -0.02 | -0.01 | 0.02  |
| 31 | 1 | -0.09 | 0.01  | -0.14 | -0.02 | 0.00  | -0.03 | -0.03 | 0.03  | 0.03  |
| 32 | 6 | 0.02  | 0.00  | 0.01  | 0.00  | 0.00  | 0.00  | 0.00  | 0.00  | 0.03  |
| 33 | 1 | 0.02  | 0.00  | 0.01  | 0.00  | -0.01 | 0.00  | 0.02  | -0.02 | 0.04  |
| 34 | 6 | -0.01 | 0.02  | -0.01 | 0.00  | -0.01 | 0.00  | 0.00  | -0.01 | 0.02  |
| 35 | 1 | -0.03 | 0.04  | -0.03 | 0.01  | -0.01 | 0.01  | 0.03  | -0.01 | 0.02  |
| 36 | 6 | 0.10  | 0.12  | -0.01 | -0.02 | 0.08  | 0.03  | 0.04  | 0.02  | -0.01 |
| 37 | 1 | 0.30  | 0.24  | -0.09 | 0.02  | 0.13  | -0.03 | -0.33 | -0.16 | 0.08  |
| 38 | 1 | -0.01 | 0.25  | 0.13  | -0.07 | 0.13  | 0.08  | 0.39  | -0.22 | -0.10 |
| 39 | 1 | 0.09  | -0.06 | -0.08 | -0.02 | 0.03  | 0.05  | 0.09  | 0.45  | -0.01 |
| 40 | 6 | 0.00  | 0.05  | -0.07 | 0.02  | 0.03  | -0.05 | -0.03 | 0.02  | -0.02 |
| 41 | 1 | 0.02  | 0.08  | -0.10 | 0.04  | 0.07  | -0.07 | -0.03 | 0.02  | -0.01 |
| 42 | 6 | -0.04 | -0.03 | 0.01  | 0.07  | -0.08 | -0.01 | 0.02  | -0.04 | -0.03 |
| 43 | 1 | 0.10  | -0.26 | 0.01  | -0.20 | 0.26  | 0.05  | 0.05  | -0.11 | -0.02 |
| 44 | 1 | -0.29 | -0.05 | -0.09 | 0.60  | -0.05 | 0.05  | -0.01 | -0.05 | -0.10 |
| 45 | 1 | 0.04  | 0.18  | 0.09  | -0.08 | -0.57 | -0.12 | 0.03  | -0.03 | 0.02  |
| 46 | 6 | -0.01 | -0.01 | 0.04  | -0.01 | 0.00  | 0.00  | -0.01 | 0.01  | 0.00  |
| 47 | 1 | -0.02 | -0.01 | 0.04  | 0.00  | 0.01  | -0.01 | -0.02 | 0.01  | 0.00  |
| 48 | 6 | 0.03  | 0.01  | -0.03 | -0.01 | 0.00  | 0.01  | -0.01 | 0.00  | 0.00  |
| 49 | 1 | 0.00  | 0.10  | -0.11 | -0.01 | -0.01 | 0.02  | -0.02 | 0.00  | -0.01 |
| 50 | 1 | 0.13  | -0.03 | -0.07 | -0.03 | 0.00  | 0.02  | -0.01 | 0.00  | 0.00  |
| 51 | 6 | 0.00  | 0.00  | 0.00  | -0.01 | 0.00  | 0.01  | 0.00  | 0.00  | 0.00  |
| 52 | 1 | -0.03 | 0.03  | 0.01  | 0.01  | 0.00  | 0.01  | 0.02  | 0.00  | 0.00  |
| 53 | 6 | 0.01  | -0.01 | -0.03 | -0.03 | 0.01  | 0.03  | 0.00  | -0.01 | 0.00  |
| 54 | 1 | 0.01  | -0.01 | -0.04 | -0.03 | 0.01  | 0.04  | -0.02 | -0.01 | -0.01 |
| 55 | 6 | -0.02 | 0.00  | 0.01  | 0.02  | 0.00  | -0.02 | 0.00  | 0.00  | 0.00  |
| 56 | 1 | -0.05 | 0.01  | 0.03  | 0.06  | -0.02 | -0.05 | 0.00  | 0.01  | -0.01 |
| 57 | 6 | 0.02  | -0.01 | -0.02 | -0.04 | 0.01  | 0.02  | 0.01  | -0.01 | 0.02  |
| 58 | 1 | 0.03  | -0.01 | -0.01 | -0.04 | 0.01  | 0.02  | 0.02  | -0.01 | 0.03  |
| 59 | 8 | -0.03 | 0.01  | -0.06 | 0.00  | -0.01 | -0.04 | -0.05 | 0.03  | -0.01 |
| 60 | 8 | -0.11 | 0.02  | 0.00  | 0.00  | -0.01 | 0.00  | 0.01  | 0.01  | 0.01  |
| 61 | 8 | 0.00  | -0.01 | 0.04  | -0.01 | 0.01  | 0.01  | 0.00  | 0.01  | 0.00  |
| 62 | 6 | -0.04 | -0.01 | 0.00  | -0.01 | -0.01 | 0.00  | 0.01  | 0.01  | 0.00  |
| 63 | 6 | 0.01  | -0.01 | 0.00  | 0.00  | 0.00  | 0.00  | 0.00  | 0.00  | 0.00  |
| 64 | 6 | 0.04  | -0.03 | 0.02  | 0.00  | -0.01 | 0.00  | 0.00  | 0.01  | 0.00  |
| 65 | 8 | 0.01  | -0.05 | 0.01  | 0.00  | -0.02 | 0.01  | -0.01 | 0.00  | 0.00  |
| 66 | 1 | 0.07  | -0.02 | 0.04  | 0.01  | 0.00  | 0.00  | -0.01 | 0.00  | 0.00  |
| 67 | 6 | -0.06 | -0.01 | 0.02  | -0.02 | -0.01 | 0.02  | 0.02  | 0.01  | -0.01 |
| 68 | 1 | -0.11 | -0.05 | 0.00  | -0.04 | -0.03 | 0.01  | 0.03  | 0.02  | 0.00  |
| 69 | 1 | -0.08 | 0.07  | 0.06  | -0.03 | 0.00  | 0.03  | 0.02  | -0.01 | -0.02 |
| 70 | 1 | -0.09 | -0.03 | 0.01  | -0.03 | 0.00  | 0.03  | 0.02  | 0.01  | -0.01 |
| 71 | 6 | 0.04  | 0.07  | 0.01  | 0.02  | 0.05  | 0.01  | -0.01 | -0.04 | 0.00  |
| 72 | 1 | -0.02 | 0.15  | 0.04  | -0.02 | 0.09  | 0.03  | 0.01  | -0.07 | -0.02 |

|                |    |          |       |       |          |       |       |          |       |       |
|----------------|----|----------|-------|-------|----------|-------|-------|----------|-------|-------|
| 73             | 1  | 0.05     | 0.02  | 0.00  | 0.02     | 0.03  | 0.00  | -0.02    | -0.03 | 0.00  |
| 74             | 1  | 0.14     | 0.10  | 0.02  | 0.07     | 0.07  | 0.00  | -0.05    | -0.05 | 0.00  |
|                |    | 34       |       |       | 35       |       |       | 36       |       |       |
|                |    | A        |       |       | A        |       |       | A        |       |       |
| Frequencies -- |    | 309.4370 |       |       | 318.4041 |       |       | 324.3715 |       |       |
| Red. masses -- |    | 2.7679   |       |       | 2.4153   |       |       | 2.3640   |       |       |
| Frc consts --  |    | 0.1562   |       |       | 0.1443   |       |       | 0.1465   |       |       |
| IR Inten --    |    | 1.4908   |       |       | 1.0386   |       |       | 2.7224   |       |       |
| Raman Activ -- |    | 0.8910   |       |       | 0.6364   |       |       | 1.5504   |       |       |
| Depolar (P) -- |    | 0.1500   |       |       | 0.6941   |       |       | 0.7497   |       |       |
| Depolar (U) -- |    | 0.2609   |       |       | 0.8195   |       |       | 0.8569   |       |       |
| Atom           | AN | X        | Y     | Z     | X        | Y     | Z     | X        | Y     | Z     |
| 1              | 6  | 0.02     | -0.01 | 0.02  | 0.00     | -0.03 | 0.01  | -0.03    | -0.01 | -0.02 |
| 2              | 6  | 0.00     | 0.00  | 0.00  | 0.00     | -0.04 | 0.00  | -0.02    | -0.03 | -0.01 |
| 3              | 6  | 0.02     | 0.00  | 0.01  | 0.00     | -0.02 | -0.01 | -0.01    | 0.00  | 0.01  |
| 4              | 6  | -0.01    | 0.01  | 0.00  | 0.02     | 0.00  | -0.02 | 0.02     | 0.00  | 0.01  |
| 5              | 6  | -0.01    | -0.02 | 0.01  | 0.03     | 0.05  | -0.01 | 0.02     | 0.01  | 0.00  |
| 6              | 6  | -0.01    | -0.03 | 0.01  | 0.04     | 0.07  | -0.03 | 0.02     | 0.02  | -0.03 |
| 7              | 8  | -0.01    | 0.00  | -0.02 | 0.00     | -0.04 | -0.04 | -0.01    | -0.04 | -0.02 |
| 8              | 6  | 0.00     | -0.01 | 0.01  | 0.00     | -0.01 | 0.03  | -0.01    | 0.00  | 0.01  |
| 9              | 6  | -0.02    | 0.00  | -0.01 | -0.04    | -0.02 | 0.00  | -0.01    | -0.03 | 0.01  |
| 10             | 1  | -0.05    | 0.00  | 0.01  | -0.06    | -0.02 | 0.01  | 0.03     | -0.05 | -0.01 |
| 11             | 8  | 0.03     | -0.02 | 0.02  | -0.03    | -0.02 | 0.03  | -0.09    | 0.00  | -0.01 |
| 12             | 6  | -0.02    | 0.03  | 0.00  | -0.02    | 0.00  | -0.02 | 0.02     | -0.02 | 0.02  |
| 13             | 1  | 0.03     | -0.01 | 0.04  | -0.01    | -0.02 | 0.00  | 0.02     | -0.01 | 0.00  |
| 14             | 6  | -0.02    | 0.05  | 0.01  | -0.03    | -0.08 | 0.01  | -0.09    | -0.01 | 0.07  |
| 15             | 8  | -0.01    | -0.01 | -0.02 | 0.01     | 0.01  | 0.00  | 0.01     | 0.00  | -0.05 |
| 16             | 6  | 0.01     | -0.01 | 0.00  | 0.04     | 0.02  | 0.00  | 0.00     | 0.02  | 0.00  |
| 17             | 1  | 0.00     | -0.02 | -0.02 | 0.01     | 0.02  | -0.05 | -0.01    | -0.01 | -0.04 |
| 18             | 1  | 0.02     | 0.01  | -0.01 | 0.07     | 0.04  | -0.02 | 0.03     | 0.08  | -0.04 |
| 19             | 1  | 0.01     | 0.00  | 0.02  | 0.07     | 0.03  | 0.02  | 0.02     | 0.05  | 0.07  |
| 20             | 6  | 0.00     | -0.01 | 0.01  | -0.01    | -0.03 | 0.01  | -0.02    | -0.01 | -0.02 |
| 21             | 1  | 0.00     | -0.03 | 0.00  | 0.00     | -0.04 | -0.01 | -0.01    | 0.02  | -0.02 |
| 22             | 6  | 0.02     | -0.01 | 0.02  | 0.00     | 0.04  | 0.05  | 0.02     | 0.07  | -0.01 |
| 23             | 1  | 0.04     | 0.03  | 0.03  | 0.06     | 0.12  | 0.10  | 0.08     | 0.20  | 0.01  |
| 24             | 1  | -0.02    | -0.02 | 0.04  | -0.09    | 0.07  | 0.05  | -0.10    | 0.08  | 0.00  |
| 25             | 1  | 0.04     | -0.03 | -0.01 | 0.06     | 0.00  | 0.05  | 0.11     | -0.02 | -0.04 |
| 26             | 6  | 0.02     | -0.04 | -0.06 | 0.00     | 0.08  | 0.11  | -0.01    | 0.03  | -0.03 |
| 27             | 1  | 0.08     | 0.01  | -0.12 | -0.13    | -0.02 | 0.23  | -0.01    | 0.04  | -0.04 |
| 28             | 1  | 0.00     | -0.13 | -0.12 | 0.08     | 0.24  | 0.23  | -0.02    | 0.03  | -0.03 |
| 29             | 6  | -0.01    | -0.02 | 0.00  | -0.01    | -0.01 | 0.04  | 0.03     | 0.02  | 0.05  |
| 30             | 1  | -0.04    | -0.03 | 0.02  | 0.01     | 0.00  | 0.03  | 0.13     | 0.07  | -0.01 |
| 31             | 1  | -0.01    | -0.02 | -0.03 | -0.01    | 0.00  | 0.07  | 0.05     | -0.01 | 0.18  |
| 32             | 6  | 0.00     | -0.01 | 0.01  | -0.02    | 0.01  | 0.02  | -0.02    | 0.00  | 0.01  |
| 33             | 1  | 0.00     | 0.00  | 0.00  | -0.04    | 0.03  | 0.00  | -0.03    | 0.00  | 0.01  |
| 34             | 6  | -0.01    | 0.00  | -0.01 | -0.02    | 0.01  | -0.01 | -0.02    | -0.01 | 0.00  |
| 35             | 1  | -0.03    | 0.02  | -0.02 | -0.04    | 0.04  | -0.04 | 0.00     | 0.00  | -0.01 |
| 36             | 6  | -0.02    | 0.06  | 0.01  | 0.11     | -0.01 | -0.05 | 0.04     | 0.06  | 0.01  |
| 37             | 1  | 0.11     | 0.16  | -0.06 | 0.18     | 0.00  | -0.03 | 0.19     | 0.15  | -0.05 |
| 38             | 1  | -0.14    | 0.17  | 0.08  | 0.11     | 0.01  | -0.01 | -0.05    | 0.16  | 0.11  |
| 39             | 1  | -0.04    | -0.08 | 0.01  | 0.11     | -0.05 | -0.12 | 0.03     | -0.07 | -0.02 |
| 40             | 6  | 0.04     | 0.00  | -0.04 | -0.03    | 0.00  | 0.02  | -0.01    | 0.02  | -0.02 |

|    |   |       |       |       |       |       |       |       |       |       |
|----|---|-------|-------|-------|-------|-------|-------|-------|-------|-------|
| 41 | 1 | 0.06  | 0.02  | -0.05 | -0.08 | 0.01  | 0.00  | -0.01 | 0.03  | -0.03 |
| 42 | 6 | 0.03  | -0.06 | 0.01  | 0.01  | 0.08  | -0.04 | 0.14  | -0.04 | -0.02 |
| 43 | 1 | 0.11  | -0.14 | -0.01 | -0.22 | 0.36  | 0.02  | 0.41  | -0.33 | -0.11 |
| 44 | 1 | -0.03 | -0.06 | -0.04 | 0.34  | 0.11  | 0.08  | -0.15 | -0.06 | -0.18 |
| 45 | 1 | 0.07  | -0.01 | 0.09  | -0.11 | -0.20 | -0.20 | 0.28  | 0.21  | 0.23  |
| 46 | 6 | 0.02  | 0.01  | -0.02 | 0.00  | 0.00  | 0.02  | 0.03  | 0.00  | 0.01  |
| 47 | 1 | 0.04  | 0.02  | -0.06 | -0.04 | -0.01 | 0.08  | 0.03  | 0.00  | 0.00  |
| 48 | 6 | 0.00  | -0.01 | 0.02  | 0.01  | 0.02  | -0.03 | 0.02  | 0.00  | 0.02  |
| 49 | 1 | 0.02  | -0.04 | 0.06  | 0.00  | 0.05  | -0.06 | 0.03  | -0.01 | 0.03  |
| 50 | 1 | -0.05 | 0.01  | 0.03  | 0.07  | 0.00  | -0.03 | 0.02  | 0.01  | 0.03  |
| 51 | 6 | -0.01 | 0.00  | 0.01  | 0.02  | 0.01  | -0.02 | 0.00  | 0.01  | 0.00  |
| 52 | 1 | -0.03 | -0.01 | 0.00  | 0.09  | 0.01  | 0.01  | 0.07  | -0.01 | 0.02  |
| 53 | 6 | 0.00  | 0.03  | 0.03  | -0.07 | -0.05 | -0.04 | -0.10 | 0.00  | 0.03  |
| 54 | 1 | 0.02  | 0.04  | 0.06  | -0.12 | -0.07 | -0.08 | -0.13 | -0.01 | 0.02  |
| 55 | 6 | 0.02  | -0.01 | 0.00  | -0.03 | 0.01  | -0.05 | 0.00  | 0.00  | -0.07 |
| 56 | 1 | 0.04  | -0.04 | -0.01 | -0.03 | 0.06  | -0.08 | 0.07  | 0.00  | -0.15 |
| 57 | 6 | -0.04 | 0.03  | -0.01 | 0.00  | -0.05 | 0.03  | -0.08 | -0.01 | 0.05  |
| 58 | 1 | -0.06 | 0.04  | -0.03 | 0.05  | -0.06 | 0.07  | -0.08 | -0.01 | 0.08  |
| 59 | 8 | 0.01  | -0.02 | -0.03 | 0.02  | -0.03 | 0.00  | -0.03 | -0.01 | -0.01 |
| 60 | 8 | -0.08 | 0.10  | 0.06  | -0.07 | 0.04  | 0.02  | 0.07  | -0.03 | 0.00  |
| 61 | 8 | 0.01  | 0.03  | 0.03  | 0.03  | -0.03 | -0.04 | 0.05  | 0.00  | 0.00  |
| 62 | 6 | 0.00  | 0.05  | 0.00  | -0.01 | 0.01  | 0.00  | 0.02  | -0.01 | 0.01  |
| 63 | 6 | 0.02  | 0.02  | 0.01  | 0.01  | 0.01  | 0.00  | 0.00  | 0.00  | 0.00  |
| 64 | 6 | 0.01  | 0.05  | 0.03  | 0.01  | 0.01  | 0.01  | -0.02 | 0.00  | -0.01 |
| 65 | 8 | -0.03 | 0.00  | -0.01 | -0.01 | -0.01 | 0.00  | -0.01 | 0.00  | 0.01  |
| 66 | 1 | -0.02 | 0.01  | 0.01  | 0.01  | 0.01  | 0.01  | -0.02 | 0.00  | -0.02 |
| 67 | 6 | 0.10  | 0.07  | -0.06 | 0.02  | 0.03  | -0.01 | -0.01 | -0.02 | 0.01  |
| 68 | 1 | 0.15  | 0.16  | -0.05 | 0.03  | 0.05  | -0.01 | -0.01 | -0.03 | 0.01  |
| 69 | 1 | 0.13  | 0.03  | -0.12 | 0.03  | 0.03  | -0.03 | -0.01 | -0.04 | 0.02  |
| 70 | 1 | 0.11  | 0.02  | -0.11 | 0.02  | 0.01  | -0.03 | 0.00  | 0.01  | 0.03  |
| 71 | 6 | -0.07 | -0.24 | -0.02 | -0.02 | -0.06 | -0.01 | 0.00  | 0.04  | 0.00  |
| 72 | 1 | 0.10  | -0.45 | -0.13 | 0.03  | -0.11 | -0.04 | -0.02 | 0.07  | 0.02  |
| 73 | 1 | -0.09 | -0.20 | -0.01 | -0.02 | -0.06 | -0.01 | 0.00  | 0.05  | 0.01  |
| 74 | 1 | -0.32 | -0.32 | 0.03  | -0.08 | -0.08 | 0.01  | 0.04  | 0.05  | -0.02 |

|                |          |          |          |
|----------------|----------|----------|----------|
|                | 37       | 38       | 39       |
|                | A        | A        | A        |
| Frequencies -- | 334.6182 | 347.1844 | 356.8677 |
| Red. masses -- | 3.2377   | 2.5962   | 3.9452   |
| Frc consts --  | 0.2136   | 0.1844   | 0.2960   |
| IR Inten --    | 0.4004   | 0.2931   | 0.7302   |
| Raman Activ -- | 0.5418   | 1.3363   | 3.3523   |
| Depolar (P) -- | 0.6220   | 0.6948   | 0.2033   |
| Depolar (U) -- | 0.7669   | 0.8199   | 0.3380   |

|      |    |       |       |       |       |       |       |       |       |       |
|------|----|-------|-------|-------|-------|-------|-------|-------|-------|-------|
| Atom | AN | X     | Y     | Z     | X     | Y     | Z     | X     | Y     | Z     |
| 1    | 6  | 0.05  | -0.01 | 0.04  | -0.01 | 0.00  | -0.02 | 0.06  | -0.05 | 0.07  |
| 2    | 6  | 0.04  | 0.03  | 0.02  | -0.01 | 0.02  | 0.01  | 0.06  | -0.01 | 0.06  |
| 3    | 6  | 0.02  | -0.02 | -0.01 | -0.02 | -0.05 | -0.02 | -0.04 | -0.10 | 0.06  |
| 4    | 6  | -0.03 | 0.00  | -0.04 | -0.01 | -0.03 | -0.05 | 0.00  | -0.04 | 0.02  |
| 5    | 6  | -0.03 | 0.03  | 0.00  | 0.01  | -0.04 | -0.06 | -0.02 | 0.02  | 0.02  |
| 6    | 6  | 0.03  | 0.04  | -0.02 | -0.01 | -0.03 | -0.01 | -0.02 | 0.04  | 0.00  |
| 7    | 8  | 0.00  | 0.05  | 0.01  | -0.02 | 0.02  | 0.07  | -0.03 | 0.04  | 0.01  |
| 8    | 6  | 0.01  | -0.01 | -0.01 | 0.03  | 0.03  | -0.02 | 0.02  | 0.03  | -0.08 |

|    |   |       |       |       |       |       |       |       |       |       |
|----|---|-------|-------|-------|-------|-------|-------|-------|-------|-------|
| 9  | 6 | -0.03 | 0.04  | -0.03 | 0.02  | 0.01  | -0.02 | 0.05  | -0.01 | -0.07 |
| 10 | 1 | -0.10 | 0.05  | 0.01  | 0.02  | 0.00  | -0.01 | 0.04  | -0.04 | -0.08 |
| 11 | 8 | 0.11  | -0.01 | 0.02  | 0.02  | 0.03  | 0.00  | 0.09  | 0.00  | -0.03 |
| 12 | 6 | -0.06 | 0.03  | -0.06 | 0.01  | -0.02 | -0.02 | 0.03  | -0.04 | -0.04 |
| 13 | 1 | -0.07 | 0.01  | -0.04 | 0.01  | -0.05 | 0.02  | 0.06  | -0.06 | -0.02 |
| 14 | 6 | -0.07 | 0.01  | 0.07  | -0.01 | 0.00  | 0.01  | 0.02  | -0.03 | -0.01 |
| 15 | 8 | 0.03  | 0.00  | -0.02 | 0.00  | 0.00  | -0.01 | 0.02  | 0.01  | 0.03  |
| 16 | 6 | -0.02 | -0.04 | 0.01  | 0.03  | 0.05  | -0.02 | -0.05 | 0.11  | 0.05  |
| 17 | 1 | 0.01  | -0.07 | 0.03  | 0.03  | 0.18  | 0.04  | 0.01  | 0.14  | 0.16  |
| 18 | 1 | -0.01 | -0.04 | 0.01  | -0.06 | -0.04 | 0.05  | -0.21 | 0.16  | 0.01  |
| 19 | 1 | -0.06 | -0.04 | 0.01  | 0.09  | 0.02  | -0.12 | -0.02 | 0.13  | 0.12  |
| 20 | 6 | 0.01  | 0.00  | 0.02  | 0.03  | 0.01  | -0.01 | 0.02  | -0.02 | -0.04 |
| 21 | 1 | 0.00  | -0.05 | 0.01  | 0.03  | 0.01  | -0.02 | -0.02 | -0.08 | -0.03 |
| 22 | 6 | 0.03  | -0.05 | 0.03  | -0.08 | -0.07 | -0.01 | 0.11  | -0.07 | 0.05  |
| 23 | 1 | 0.03  | -0.07 | 0.03  | -0.20 | -0.32 | -0.03 | 0.12  | -0.03 | 0.01  |
| 24 | 1 | 0.04  | -0.09 | 0.06  | 0.13  | -0.03 | -0.09 | 0.10  | -0.12 | 0.09  |
| 25 | 1 | 0.01  | -0.05 | 0.00  | -0.25 | 0.10  | 0.11  | 0.14  | -0.11 | 0.01  |
| 26 | 6 | 0.03  | 0.03  | 0.01  | -0.05 | -0.03 | 0.07  | -0.08 | 0.04  | -0.03 |
| 27 | 1 | 0.03  | 0.02  | 0.01  | -0.13 | -0.10 | 0.15  | -0.07 | 0.10  | -0.07 |
| 28 | 1 | 0.01  | 0.06  | 0.01  | 0.00  | 0.08  | 0.15  | -0.13 | 0.03  | -0.06 |
| 29 | 6 | -0.03 | -0.03 | -0.04 | 0.03  | 0.05  | 0.00  | 0.16  | 0.05  | -0.01 |
| 30 | 1 | -0.13 | -0.08 | 0.02  | 0.05  | 0.07  | -0.01 | 0.29  | 0.19  | -0.06 |
| 31 | 1 | -0.05 | -0.01 | -0.17 | 0.04  | 0.04  | 0.03  | 0.23  | -0.06 | 0.15  |
| 32 | 6 | 0.01  | 0.01  | -0.02 | 0.01  | 0.00  | -0.01 | -0.04 | 0.06  | -0.11 |
| 33 | 1 | -0.01 | 0.04  | -0.03 | 0.02  | -0.03 | -0.01 | -0.20 | 0.15  | -0.24 |
| 34 | 6 | 0.01  | 0.01  | -0.01 | 0.00  | 0.01  | 0.01  | 0.03  | 0.01  | 0.01  |
| 35 | 1 | -0.02 | 0.02  | -0.01 | 0.01  | -0.01 | 0.02  | -0.07 | 0.03  | -0.02 |
| 36 | 6 | -0.05 | -0.12 | -0.06 | -0.09 | 0.13  | -0.02 | 0.06  | 0.03  | 0.01  |
| 37 | 1 | -0.22 | -0.26 | 0.06  | -0.11 | 0.22  | -0.16 | 0.06  | 0.06  | -0.02 |
| 38 | 1 | 0.07  | -0.27 | -0.22 | -0.13 | 0.20  | 0.08  | 0.10  | 0.04  | 0.08  |
| 39 | 1 | -0.03 | 0.03  | -0.04 | -0.10 | 0.14  | 0.06  | 0.07  | 0.07  | -0.03 |
| 40 | 6 | 0.02  | -0.03 | 0.03  | -0.05 | -0.06 | 0.02  | -0.09 | -0.04 | 0.00  |
| 41 | 1 | -0.01 | -0.07 | 0.06  | -0.08 | -0.05 | 0.00  | -0.11 | -0.04 | -0.01 |
| 42 | 6 | 0.19  | 0.03  | 0.02  | 0.07  | 0.11  | 0.08  | -0.02 | -0.05 | -0.04 |
| 43 | 1 | 0.38  | -0.09 | -0.09 | 0.15  | 0.21  | -0.05 | -0.01 | -0.11 | 0.00  |
| 44 | 1 | 0.06  | 0.02  | -0.03 | 0.04  | 0.12  | 0.24  | -0.02 | -0.05 | -0.14 |
| 45 | 1 | 0.27  | 0.14  | 0.22  | 0.11  | 0.20  | 0.13  | -0.02 | -0.08 | -0.01 |
| 46 | 6 | -0.04 | 0.02  | 0.01  | 0.06  | -0.02 | -0.07 | -0.06 | 0.02  | 0.03  |
| 47 | 1 | -0.06 | 0.01  | 0.04  | 0.10  | -0.03 | -0.09 | -0.09 | 0.02  | 0.06  |
| 48 | 6 | -0.04 | 0.02  | 0.00  | 0.03  | -0.02 | 0.01  | -0.05 | 0.02  | 0.00  |
| 49 | 1 | -0.05 | 0.00  | -0.01 | 0.07  | -0.06 | 0.08  | -0.07 | 0.00  | -0.01 |
| 50 | 1 | -0.05 | 0.03  | 0.01  | -0.04 | 0.01  | 0.03  | -0.05 | 0.03  | 0.01  |
| 51 | 6 | 0.00  | 0.02  | 0.00  | 0.00  | -0.01 | 0.00  | -0.01 | 0.02  | 0.00  |
| 52 | 1 | 0.07  | 0.00  | 0.01  | 0.00  | -0.01 | 0.00  | 0.01  | 0.02  | 0.00  |
| 53 | 6 | -0.06 | 0.01  | 0.06  | -0.01 | 0.00  | 0.00  | 0.02  | -0.02 | -0.01 |
| 54 | 1 | -0.07 | 0.01  | 0.07  | -0.01 | 0.00  | 0.01  | 0.01  | -0.03 | -0.02 |
| 55 | 6 | 0.03  | 0.00  | -0.03 | 0.00  | 0.00  | 0.00  | 0.00  | 0.01  | 0.02  |
| 56 | 1 | 0.10  | -0.01 | -0.10 | 0.01  | -0.01 | -0.01 | -0.02 | 0.03  | 0.03  |
| 57 | 6 | -0.05 | 0.01  | 0.07  | -0.01 | 0.00  | 0.00  | 0.04  | -0.02 | 0.01  |
| 58 | 1 | -0.06 | 0.01  | 0.08  | -0.01 | 0.00  | 0.00  | 0.06  | -0.02 | 0.03  |
| 59 | 8 | 0.04  | 0.00  | 0.03  | 0.01  | -0.07 | -0.01 | -0.16 | -0.10 | 0.01  |
| 60 | 8 | -0.12 | 0.05  | -0.04 | -0.01 | 0.02  | 0.03  | -0.02 | 0.00  | 0.01  |

|    |   |       |       |       |       |       |       |       |       |       |
|----|---|-------|-------|-------|-------|-------|-------|-------|-------|-------|
| 61 | 8 | -0.06 | 0.01  | -0.02 | 0.05  | -0.02 | -0.05 | -0.07 | 0.02  | 0.01  |
| 62 | 6 | -0.05 | 0.02  | -0.04 | 0.00  | 0.00  | 0.01  | -0.01 | 0.00  | 0.00  |
| 63 | 6 | -0.02 | -0.02 | -0.01 | -0.01 | 0.00  | 0.00  | 0.00  | 0.01  | 0.00  |
| 64 | 6 | 0.04  | -0.06 | 0.03  | 0.00  | -0.01 | 0.01  | 0.00  | 0.02  | 0.00  |
| 65 | 8 | 0.03  | 0.01  | -0.02 | -0.01 | -0.04 | 0.01  | -0.01 | -0.01 | 0.01  |
| 66 | 1 | 0.07  | -0.08 | 0.06  | 0.01  | -0.01 | 0.01  | 0.00  | 0.02  | 0.00  |
| 67 | 6 | -0.05 | -0.04 | -0.01 | 0.00  | 0.00  | 0.00  | 0.01  | 0.02  | 0.00  |
| 68 | 1 | -0.09 | -0.05 | -0.04 | 0.00  | 0.00  | 0.00  | 0.02  | 0.03  | 0.01  |
| 69 | 1 | -0.06 | 0.07  | 0.01  | 0.00  | 0.01  | 0.00  | 0.02  | 0.01  | 0.00  |
| 70 | 1 | -0.09 | -0.08 | -0.05 | -0.01 | -0.01 | -0.01 | 0.02  | 0.03  | 0.00  |
| 71 | 6 | 0.02  | 0.01  | 0.02  | -0.01 | 0.00  | 0.01  | 0.00  | 0.00  | -0.01 |
| 72 | 1 | -0.01 | 0.05  | 0.05  | 0.00  | -0.02 | 0.02  | 0.01  | -0.01 | -0.01 |
| 73 | 1 | 0.06  | -0.02 | -0.01 | 0.00  | 0.01  | 0.00  | -0.01 | 0.01  | 0.00  |
| 74 | 1 | 0.07  | 0.03  | 0.05  | -0.02 | -0.01 | 0.00  | -0.02 | 0.00  | -0.01 |

|                |  |          |  |          |  |          |
|----------------|--|----------|--|----------|--|----------|
|                |  | 40       |  | 41       |  | 42       |
|                |  | A        |  | A        |  | A        |
| Frequencies -- |  | 359.4360 |  | 376.4872 |  | 385.0408 |
| Red. masses -- |  | 3.0891   |  | 4.2492   |  | 3.9238   |
| Frc consts --  |  | 0.2351   |  | 0.3549   |  | 0.3427   |
| IR Inten --    |  | 1.0513   |  | 0.6057   |  | 0.8025   |
| Raman Activ -- |  | 0.2212   |  | 1.5014   |  | 1.7490   |
| Depolar (P) -- |  | 0.1757   |  | 0.3697   |  | 0.2334   |
| Depolar (U) -- |  | 0.2990   |  | 0.5398   |  | 0.3785   |

|    |      |       |       |       |       |       |       |       |       |       |   |
|----|------|-------|-------|-------|-------|-------|-------|-------|-------|-------|---|
|    | Atom | AN    | X     | Y     | Z     | X     | Y     | Z     | X     | Y     | Z |
| 1  | 6    | 0.04  | -0.04 | -0.01 | 0.01  | 0.00  | -0.02 | 0.05  | -0.05 | 0.02  |   |
| 2  | 6    | -0.03 | -0.09 | 0.01  | 0.01  | -0.02 | 0.00  | 0.04  | -0.12 | 0.01  |   |
| 3  | 6    | 0.06  | 0.07  | -0.03 | 0.00  | 0.00  | -0.06 | 0.02  | 0.05  | -0.07 |   |
| 4  | 6    | 0.00  | 0.03  | 0.00  | -0.02 | 0.01  | -0.07 | 0.00  | 0.05  | -0.09 |   |
| 5  | 6    | -0.01 | 0.01  | 0.02  | -0.07 | 0.01  | -0.02 | -0.01 | -0.02 | -0.04 |   |
| 6  | 6    | 0.01  | -0.01 | 0.02  | -0.03 | -0.04 | -0.02 | -0.06 | -0.04 | 0.05  |   |
| 7  | 8    | -0.07 | -0.07 | -0.01 | -0.02 | 0.00  | 0.01  | -0.03 | -0.08 | -0.09 |   |
| 8  | 6    | 0.04  | 0.02  | -0.05 | 0.00  | 0.00  | 0.01  | -0.02 | -0.01 | 0.04  |   |
| 9  | 6    | -0.03 | -0.07 | -0.04 | 0.03  | -0.02 | 0.04  | 0.04  | 0.06  | 0.05  |   |
| 10 | 1    | -0.05 | -0.11 | -0.04 | 0.07  | 0.00  | 0.02  | 0.05  | 0.14  | 0.06  |   |
| 11 | 8    | -0.07 | -0.02 | 0.03  | -0.04 | 0.00  | 0.01  | 0.01  | 0.03  | -0.04 |   |
| 12 | 6    | 0.00  | -0.01 | -0.02 | 0.02  | -0.01 | 0.02  | 0.03  | 0.07  | 0.02  |   |
| 13 | 1    | 0.07  | 0.00  | -0.03 | 0.01  | -0.03 | 0.04  | 0.01  | 0.05  | 0.04  |   |
| 14 | 6    | -0.01 | 0.02  | 0.00  | 0.01  | 0.09  | 0.03  | 0.03  | -0.01 | -0.02 |   |
| 15 | 8    | 0.00  | 0.00  | -0.01 | 0.04  | -0.01 | 0.03  | -0.01 | 0.00  | 0.02  |   |
| 16 | 6    | 0.04  | 0.14  | 0.01  | -0.01 | -0.01 | 0.02  | -0.02 | 0.01  | 0.06  |   |
| 17 | 1    | 0.05  | 0.34  | 0.10  | 0.00  | -0.04 | 0.03  | -0.01 | -0.02 | 0.05  |   |
| 18 | 1    | -0.15 | 0.11  | 0.04  | 0.00  | 0.01  | 0.01  | -0.03 | 0.08  | 0.01  |   |
| 19 | 1    | 0.18  | 0.13  | -0.03 | -0.03 | 0.00  | 0.04  | -0.01 | 0.04  | 0.13  |   |
| 20 | 6    | 0.04  | -0.04 | -0.06 | 0.01  | 0.00  | 0.02  | 0.02  | 0.00  | 0.08  |   |
| 21 | 1    | 0.04  | -0.08 | -0.07 | 0.01  | 0.03  | 0.03  | 0.00  | 0.01  | 0.11  |   |
| 22 | 6    | -0.10 | -0.06 | 0.09  | 0.00  | 0.03  | 0.01  | 0.15  | 0.01  | -0.01 |   |
| 23 | 1    | -0.15 | -0.25 | 0.17  | 0.03  | 0.08  | 0.04  | 0.21  | 0.18  | -0.06 |   |
| 24 | 1    | -0.03 | -0.02 | 0.03  | -0.06 | 0.04  | 0.02  | 0.07  | 0.00  | 0.02  |   |
| 25 | 1    | -0.26 | 0.08  | 0.14  | 0.02  | 0.00  | -0.01 | 0.30  | -0.11 | -0.03 |   |
| 26 | 6    | 0.08  | -0.01 | -0.01 | 0.01  | -0.05 | 0.01  | -0.06 | -0.02 | 0.05  |   |
| 27 | 1    | 0.11  | 0.00  | -0.03 | 0.00  | -0.09 | 0.04  | -0.14 | -0.05 | 0.12  |   |
| 28 | 1    | 0.09  | -0.06 | -0.03 | 0.02  | -0.03 | 0.03  | 0.07  | -0.02 | 0.12  |   |

|    |   |       |       |       |       |       |       |       |       |       |
|----|---|-------|-------|-------|-------|-------|-------|-------|-------|-------|
| 29 | 6 | 0.10  | 0.07  | 0.07  | -0.03 | 0.00  | 0.01  | 0.03  | -0.04 | 0.00  |
| 30 | 1 | 0.25  | 0.20  | 0.00  | -0.03 | -0.02 | 0.01  | 0.06  | -0.04 | -0.02 |
| 31 | 1 | 0.14  | 0.03  | 0.28  | -0.04 | 0.02  | 0.01  | 0.05  | -0.07 | 0.01  |
| 32 | 6 | -0.04 | -0.03 | -0.05 | -0.02 | 0.00  | 0.00  | -0.13 | 0.05  | -0.01 |
| 33 | 1 | -0.13 | -0.04 | -0.12 | -0.05 | 0.03  | -0.01 | -0.31 | 0.22  | -0.14 |
| 34 | 6 | -0.06 | -0.04 | -0.01 | 0.00  | -0.02 | 0.00  | 0.01  | -0.06 | 0.02  |
| 35 | 1 | -0.10 | 0.00  | -0.05 | -0.01 | 0.00  | -0.02 | -0.03 | 0.03  | -0.06 |
| 36 | 6 | -0.03 | -0.07 | 0.00  | 0.20  | 0.07  | -0.15 | -0.11 | 0.02  | -0.08 |
| 37 | 1 | -0.08 | -0.13 | 0.06  | 0.31  | 0.11  | -0.15 | -0.13 | 0.02  | -0.09 |
| 38 | 1 | -0.04 | -0.12 | -0.10 | 0.29  | 0.09  | 0.01  | -0.17 | 0.03  | -0.13 |
| 39 | 1 | -0.04 | -0.07 | 0.03  | 0.21  | 0.08  | -0.33 | -0.12 | -0.01 | 0.00  |
| 40 | 6 | 0.09  | 0.05  | -0.01 | 0.02  | -0.06 | 0.00  | -0.03 | 0.05  | -0.06 |
| 41 | 1 | 0.09  | 0.03  | 0.02  | 0.01  | -0.08 | 0.02  | -0.04 | 0.01  | -0.02 |
| 42 | 6 | 0.00  | -0.03 | 0.02  | 0.02  | 0.04  | 0.02  | 0.02  | -0.01 | 0.11  |
| 43 | 1 | -0.02 | -0.03 | 0.04  | 0.06  | 0.10  | -0.05 | 0.07  | 0.07  | 0.02  |
| 44 | 1 | 0.02  | -0.03 | 0.00  | 0.03  | 0.04  | 0.12  | 0.08  | 0.00  | 0.18  |
| 45 | 1 | -0.01 | -0.05 | 0.00  | 0.04  | 0.07  | 0.06  | 0.03  | -0.04 | 0.19  |
| 46 | 6 | -0.02 | 0.00  | 0.02  | -0.15 | 0.01  | -0.07 | 0.02  | -0.03 | -0.02 |
| 47 | 1 | -0.03 | 0.01  | 0.02  | -0.20 | 0.01  | -0.02 | 0.05  | -0.04 | -0.03 |
| 48 | 6 | 0.00  | 0.00  | -0.01 | -0.13 | -0.03 | -0.09 | 0.02  | 0.01  | -0.01 |
| 49 | 1 | -0.02 | 0.04  | -0.05 | -0.17 | -0.04 | -0.13 | 0.04  | 0.09  | -0.02 |
| 50 | 1 | 0.03  | -0.02 | -0.03 | -0.15 | -0.06 | -0.13 | 0.08  | -0.03 | -0.04 |
| 51 | 6 | -0.01 | 0.00  | 0.01  | -0.04 | -0.03 | -0.02 | -0.04 | 0.00  | 0.03  |
| 52 | 1 | -0.02 | 0.00  | 0.00  | -0.05 | -0.04 | -0.04 | -0.09 | 0.04  | 0.04  |
| 53 | 6 | 0.00  | 0.02  | 0.01  | 0.08  | 0.06  | 0.11  | 0.03  | -0.01 | -0.03 |
| 54 | 1 | 0.02  | 0.02  | 0.03  | 0.14  | 0.09  | 0.19  | 0.04  | -0.01 | -0.04 |
| 55 | 6 | 0.01  | 0.00  | 0.00  | 0.09  | -0.01 | 0.08  | -0.01 | 0.00  | 0.02  |
| 56 | 1 | 0.02  | -0.02 | 0.00  | 0.13  | -0.06 | 0.08  | -0.05 | 0.01  | 0.05  |
| 57 | 6 | -0.01 | 0.02  | 0.00  | 0.00  | 0.08  | 0.03  | 0.03  | -0.01 | -0.02 |
| 58 | 1 | -0.03 | 0.02  | -0.02 | -0.05 | 0.09  | 0.00  | 0.04  | -0.01 | -0.02 |
| 59 | 8 | 0.09  | 0.10  | 0.00  | 0.08  | 0.00  | -0.01 | -0.06 | 0.15  | -0.04 |
| 60 | 8 | -0.02 | 0.00  | -0.01 | 0.08  | -0.01 | 0.05  | 0.03  | 0.05  | 0.04  |
| 61 | 8 | -0.02 | 0.00  | 0.02  | -0.15 | 0.00  | -0.08 | 0.05  | -0.04 | -0.03 |
| 62 | 6 | -0.01 | 0.00  | -0.01 | 0.03  | -0.03 | 0.04  | -0.01 | 0.01  | -0.01 |
| 63 | 6 | 0.00  | 0.00  | 0.00  | 0.01  | 0.00  | 0.02  | -0.04 | 0.00  | -0.01 |
| 64 | 6 | 0.00  | 0.00  | 0.00  | -0.02 | 0.02  | 0.00  | 0.02  | -0.05 | 0.02  |
| 65 | 8 | 0.00  | 0.01  | -0.01 | -0.04 | -0.08 | 0.03  | 0.00  | -0.04 | 0.00  |
| 66 | 1 | 0.01  | 0.00  | 0.00  | -0.03 | 0.02  | -0.01 | 0.04  | -0.08 | 0.05  |
| 67 | 6 | 0.00  | 0.00  | 0.00  | 0.01  | 0.01  | 0.01  | -0.02 | -0.04 | -0.01 |
| 68 | 1 | 0.00  | 0.00  | 0.00  | 0.03  | 0.02  | 0.02  | -0.05 | -0.04 | -0.03 |
| 69 | 1 | 0.00  | 0.01  | 0.00  | 0.02  | -0.03 | 0.00  | -0.03 | 0.02  | 0.00  |
| 70 | 1 | 0.00  | 0.00  | 0.00  | 0.03  | 0.03  | 0.02  | -0.06 | -0.07 | -0.04 |
| 71 | 6 | 0.00  | 0.00  | 0.00  | -0.01 | 0.01  | 0.01  | 0.00  | 0.00  | 0.03  |
| 72 | 1 | 0.00  | 0.00  | 0.00  | -0.01 | 0.01  | 0.00  | -0.02 | 0.02  | 0.07  |
| 73 | 1 | 0.00  | 0.00  | 0.00  | -0.04 | 0.03  | 0.02  | 0.05  | -0.02 | 0.00  |
| 74 | 1 | 0.00  | 0.00  | 0.00  | -0.01 | 0.02  | -0.02 | 0.02  | 0.01  | 0.07  |

|                |          |          |          |
|----------------|----------|----------|----------|
|                | 43       | 44       | 45       |
|                | A        | A        | A        |
| Frequencies -- | 392.4550 | 416.2717 | 429.8296 |
| Red. masses -- | 5.8096   | 3.9237   | 3.6909   |
| Frc consts --  | 0.5272   | 0.4006   | 0.4018   |
| IR Inten --    | 5.2528   | 7.0349   | 2.6759   |

|                |    |        |       |       |        |       |       |        |       |       |
|----------------|----|--------|-------|-------|--------|-------|-------|--------|-------|-------|
| Raman Activ -- |    | 2.2976 |       |       | 2.9785 |       |       | 2.6095 |       |       |
| Depolar (P) -- |    | 0.2054 |       |       | 0.4448 |       |       | 0.4032 |       |       |
| Depolar (U) -- |    | 0.3407 |       |       | 0.6158 |       |       | 0.5746 |       |       |
| Atom           | AN | X      | Y     | Z     | X      | Y     | Z     | X      | Y     | Z     |
| 1              | 6  | 0.10   | 0.01  | 0.01  | 0.01   | 0.00  | 0.01  | 0.00   | 0.00  | -0.04 |
| 2              | 6  | 0.08   | 0.11  | 0.04  | 0.01   | 0.00  | 0.01  | 0.00   | -0.06 | -0.02 |
| 3              | 6  | 0.03   | 0.05  | -0.07 | 0.00   | 0.01  | 0.00  | 0.01   | -0.03 | -0.06 |
| 4              | 6  | -0.03  | 0.00  | -0.08 | 0.00   | 0.00  | 0.01  | -0.03  | -0.01 | -0.08 |
| 5              | 6  | -0.02  | -0.01 | -0.01 | 0.00   | -0.01 | -0.01 | -0.02  | 0.04  | 0.01  |
| 6              | 6  | -0.04  | 0.01  | 0.03  | -0.01  | -0.01 | -0.01 | 0.00   | 0.05  | 0.02  |
| 7              | 8  | -0.04  | 0.18  | 0.17  | 0.00   | 0.01  | 0.00  | -0.03  | -0.05 | -0.01 |
| 8              | 6  | 0.06   | -0.03 | -0.05 | 0.00   | 0.00  | 0.00  | 0.01   | 0.01  | 0.03  |
| 9              | 6  | -0.07  | -0.19 | -0.04 | -0.01  | 0.00  | -0.01 | 0.02   | 0.08  | 0.03  |
| 10             | 1  | -0.08  | -0.27 | -0.04 | -0.01  | -0.02 | -0.01 | -0.01  | 0.16  | 0.05  |
| 11             | 8  | -0.15  | -0.14 | 0.06  | 0.01   | -0.01 | 0.00  | 0.07   | 0.06  | -0.01 |
| 12             | 6  | -0.02  | -0.10 | -0.04 | 0.00   | 0.01  | 0.02  | -0.05  | -0.01 | -0.04 |
| 13             | 1  | 0.09   | -0.09 | -0.03 | 0.03   | -0.01 | 0.06  | -0.14  | -0.01 | -0.05 |
| 14             | 6  | 0.02   | -0.04 | -0.02 | 0.00   | 0.01  | 0.00  | 0.00   | -0.05 | -0.01 |
| 15             | 8  | 0.00   | 0.01  | 0.02  | 0.00   | 0.00  | 0.00  | 0.00   | 0.01  | 0.01  |
| 16             | 6  | -0.02  | -0.06 | 0.05  | 0.01   | 0.01  | 0.00  | 0.02   | 0.00  | 0.03  |
| 17             | 1  | 0.05   | -0.22 | 0.10  | 0.00   | 0.01  | 0.00  | 0.03   | 0.00  | 0.04  |
| 18             | 1  | -0.02  | 0.01  | -0.01 | 0.00   | 0.01  | 0.00  | 0.01   | -0.02 | 0.04  |
| 19             | 1  | -0.16  | -0.04 | 0.14  | 0.02   | 0.01  | 0.00  | 0.01   | -0.01 | 0.02  |
| 20             | 6  | 0.04   | -0.09 | -0.08 | -0.01  | -0.01 | -0.01 | 0.03   | 0.04  | 0.05  |
| 21             | 1  | 0.04   | -0.14 | -0.10 | -0.01  | -0.02 | -0.01 | 0.04   | 0.06  | 0.04  |
| 22             | 6  | 0.10   | -0.02 | 0.01  | 0.01   | -0.01 | 0.01  | -0.03  | 0.01  | -0.02 |
| 23             | 1  | 0.13   | 0.03  | 0.01  | 0.01   | 0.00  | 0.00  | -0.04  | -0.02 | 0.00  |
| 24             | 1  | 0.03   | -0.09 | 0.08  | 0.01   | -0.02 | 0.02  | -0.02  | 0.04  | -0.05 |
| 25             | 1  | 0.11   | -0.08 | -0.10 | 0.02   | -0.02 | 0.00  | -0.05  | 0.04  | 0.01  |
| 26             | 6  | -0.03  | 0.03  | 0.02  | -0.01  | -0.01 | 0.02  | 0.03   | 0.02  | -0.06 |
| 27             | 1  | -0.06  | 0.02  | 0.04  | -0.05  | -0.04 | 0.06  | 0.14   | 0.13  | -0.18 |
| 28             | 1  | 0.04   | 0.02  | 0.05  | 0.03   | 0.02  | 0.06  | -0.13  | -0.08 | -0.18 |
| 29             | 6  | -0.11  | -0.02 | 0.03  | 0.01   | -0.01 | 0.00  | 0.00   | 0.00  | -0.03 |
| 30             | 1  | -0.17  | -0.07 | 0.06  | 0.02   | 0.00  | 0.00  | -0.06  | -0.06 | 0.00  |
| 31             | 1  | -0.18  | 0.12  | 0.01  | 0.01   | -0.01 | 0.01  | -0.01  | 0.01  | -0.12 |
| 32             | 6  | 0.10   | 0.02  | -0.10 | 0.00   | 0.00  | -0.01 | -0.07  | 0.02  | 0.02  |
| 33             | 1  | 0.09   | 0.03  | -0.10 | -0.01  | 0.01  | -0.01 | -0.15  | 0.09  | -0.05 |
| 34             | 6  | 0.04   | 0.06  | -0.07 | 0.00   | 0.01  | 0.00  | 0.00   | -0.04 | 0.01  |
| 35             | 1  | -0.07  | 0.05  | -0.06 | -0.01  | 0.01  | 0.00  | 0.01   | 0.01  | -0.03 |
| 36             | 6  | -0.04  | 0.04  | -0.09 | 0.02   | 0.01  | 0.01  | -0.06  | 0.04  | -0.10 |
| 37             | 1  | -0.08  | 0.05  | -0.13 | 0.04   | 0.01  | 0.01  | -0.10  | 0.05  | -0.14 |
| 38             | 1  | -0.02  | 0.04  | -0.06 | 0.02   | 0.01  | 0.02  | -0.05  | 0.04  | -0.07 |
| 39             | 1  | -0.04  | 0.09  | -0.06 | 0.02   | -0.01 | -0.01 | -0.06  | 0.08  | -0.06 |
| 40             | 6  | -0.01  | 0.06  | -0.03 | -0.01  | 0.02  | -0.01 | 0.01   | -0.08 | 0.04  |
| 41             | 1  | -0.04  | 0.00  | 0.03  | 0.00   | 0.02  | -0.01 | -0.02  | -0.12 | 0.07  |
| 42             | 6  | 0.03   | -0.02 | 0.04  | 0.00   | 0.01  | 0.01  | 0.01   | -0.02 | -0.01 |
| 43             | 1  | 0.08   | -0.04 | 0.01  | 0.01   | 0.04  | -0.01 | 0.02   | -0.11 | 0.03  |
| 44             | 1  | 0.06   | -0.03 | 0.00  | 0.01   | 0.01  | 0.04  | -0.01  | -0.03 | -0.12 |
| 45             | 1  | 0.04   | -0.06 | 0.12  | 0.00   | 0.01  | 0.01  | 0.01   | -0.05 | 0.02  |
| 46             | 6  | 0.03   | -0.01 | 0.02  | 0.00   | -0.01 | -0.03 | 0.00   | 0.02  | 0.09  |
| 47             | 1  | 0.07   | -0.02 | 0.00  | 0.01   | 0.00  | -0.04 | 0.01   | 0.00  | 0.12  |
| 48             | 6  | 0.02   | 0.04  | 0.03  | -0.01  | -0.02 | -0.01 | 0.02   | 0.09  | 0.06  |



|    |   |       |       |       |       |       |       |       |       |       |
|----|---|-------|-------|-------|-------|-------|-------|-------|-------|-------|
| 49 | 1 | 0.04  | 0.07  | 0.03  | 0.00  | -0.02 | 0.00  | 0.00  | 0.10  | 0.04  |
| 50 | 1 | 0.06  | 0.03  | 0.03  | -0.02 | -0.02 | -0.02 | 0.08  | 0.11  | 0.09  |
| 51 | 6 | -0.02 | 0.03  | 0.02  | 0.00  | -0.01 | 0.00  | 0.00  | 0.07  | 0.02  |
| 52 | 1 | -0.03 | 0.05  | 0.04  | -0.01 | -0.01 | -0.01 | 0.02  | 0.09  | 0.05  |
| 53 | 6 | 0.00  | -0.03 | -0.05 | 0.01  | 0.01  | 0.01  | -0.02 | -0.04 | -0.05 |
| 54 | 1 | -0.02 | -0.04 | -0.08 | 0.01  | 0.01  | 0.02  | -0.05 | -0.06 | -0.09 |
| 55 | 6 | -0.03 | 0.01  | 0.00  | 0.01  | 0.00  | 0.01  | -0.04 | 0.01  | -0.02 |
| 56 | 1 | -0.06 | 0.03  | 0.01  | 0.01  | -0.01 | 0.01  | -0.06 | 0.04  | -0.02 |
| 57 | 6 | 0.03  | -0.04 | -0.01 | 0.00  | 0.01  | 0.00  | 0.02  | -0.05 | 0.00  |
| 58 | 1 | 0.06  | -0.04 | 0.01  | -0.01 | 0.01  | 0.00  | 0.05  | -0.05 | 0.02  |
| 59 | 8 | -0.02 | 0.16  | -0.01 | -0.02 | 0.02  | -0.01 | 0.11  | -0.03 | 0.01  |
| 60 | 8 | 0.00  | -0.04 | 0.00  | -0.06 | 0.08  | 0.06  | -0.03 | -0.08 | -0.03 |
| 61 | 8 | 0.03  | -0.01 | 0.01  | 0.00  | -0.01 | -0.02 | -0.01 | 0.01  | 0.04  |
| 62 | 6 | 0.02  | -0.04 | 0.04  | 0.05  | 0.04  | 0.10  | 0.04  | -0.07 | 0.07  |
| 63 | 6 | 0.04  | 0.00  | 0.03  | 0.16  | -0.08 | 0.07  | 0.14  | -0.06 | 0.11  |
| 64 | 6 | -0.03 | 0.06  | -0.02 | -0.03 | -0.06 | -0.22 | -0.08 | 0.09  | -0.05 |
| 65 | 8 | -0.04 | -0.05 | 0.04  | 0.01  | 0.22  | 0.09  | -0.05 | -0.07 | 0.06  |
| 66 | 1 | -0.07 | 0.09  | -0.05 | -0.19 | 0.00  | -0.34 | -0.20 | 0.16  | -0.15 |
| 67 | 6 | 0.03  | 0.05  | 0.01  | -0.09 | -0.20 | -0.01 | 0.03  | 0.06  | 0.02  |
| 68 | 1 | 0.07  | 0.06  | 0.04  | -0.14 | -0.44 | 0.01  | 0.11  | 0.07  | 0.07  |
| 69 | 1 | 0.05  | -0.04 | 0.00  | -0.12 | -0.28 | 0.10  | 0.06  | -0.13 | 0.00  |
| 70 | 1 | 0.08  | 0.09  | 0.05  | -0.03 | 0.01  | 0.19  | 0.13  | 0.14  | 0.09  |
| 71 | 6 | -0.02 | 0.01  | -0.02 | 0.00  | -0.03 | -0.10 | -0.02 | 0.02  | -0.02 |
| 72 | 1 | 0.01  | -0.01 | -0.05 | 0.02  | -0.03 | -0.31 | -0.02 | 0.03  | -0.15 |
| 73 | 1 | -0.08 | 0.05  | 0.02  | -0.26 | -0.01 | 0.03  | -0.24 | 0.11  | 0.10  |
| 74 | 1 | -0.04 | 0.01  | -0.08 | -0.01 | -0.03 | -0.22 | -0.01 | 0.03  | -0.21 |

|                |          |          |          |
|----------------|----------|----------|----------|
|                | 46       | 47       | 48       |
|                | A        | A        | A        |
| Frequencies -- | 437.1112 | 451.0159 | 461.5318 |
| Red. masses -- | 3.7708   | 2.9716   | 3.4617   |
| Frc consts --  | 0.4245   | 0.3561   | 0.4345   |
| IR Inten --    | 1.4877   | 2.9275   | 2.3465   |
| Raman Activ -- | 1.6801   | 4.0628   | 0.5970   |
| Depolar (P) -- | 0.6807   | 0.4080   | 0.6590   |
| Depolar (U) -- | 0.8100   | 0.5795   | 0.7945   |

| Atom | AN | X     | Y     | Z     | X     | Y     | Z     | X     | Y     | Z     |
|------|----|-------|-------|-------|-------|-------|-------|-------|-------|-------|
| 1    | 6  | 0.01  | -0.01 | -0.04 | 0.06  | -0.03 | 0.06  | -0.01 | 0.02  | -0.03 |
| 2    | 6  | 0.01  | 0.00  | -0.01 | -0.07 | 0.01  | -0.03 | 0.01  | -0.03 | 0.00  |
| 3    | 6  | 0.00  | -0.06 | -0.05 | 0.03  | -0.01 | 0.02  | 0.02  | 0.04  | 0.03  |
| 4    | 6  | -0.02 | 0.01  | -0.06 | 0.00  | -0.01 | -0.03 | 0.02  | -0.04 | 0.08  |
| 5    | 6  | -0.01 | 0.06  | 0.00  | -0.02 | 0.00  | -0.03 | -0.02 | -0.10 | -0.02 |
| 6    | 6  | -0.01 | 0.04  | 0.02  | -0.05 | 0.00  | 0.03  | -0.06 | -0.02 | 0.00  |
| 7    | 8  | -0.03 | 0.02  | 0.05  | 0.03  | -0.04 | -0.06 | -0.02 | -0.02 | 0.00  |
| 8    | 6  | 0.01  | 0.00  | 0.01  | -0.04 | 0.05  | -0.06 | 0.03  | -0.01 | 0.02  |
| 9    | 6  | 0.04  | -0.04 | 0.04  | 0.01  | 0.03  | -0.01 | -0.01 | 0.00  | 0.00  |
| 10   | 1  | 0.09  | -0.04 | 0.01  | 0.02  | 0.01  | -0.01 | -0.01 | 0.01  | 0.00  |
| 11   | 8  | -0.07 | 0.00  | 0.00  | 0.01  | 0.07  | 0.03  | 0.01  | -0.01 | 0.00  |
| 12   | 6  | 0.06  | 0.01  | 0.05  | 0.00  | 0.00  | 0.00  | -0.02 | -0.01 | 0.01  |
| 13   | 1  | 0.10  | -0.06 | 0.12  | -0.01 | -0.01 | 0.01  | -0.02 | 0.01  | -0.01 |
| 14   | 6  | 0.01  | -0.04 | -0.01 | 0.01  | -0.03 | -0.01 | 0.00  | -0.05 | 0.00  |
| 15   | 8  | 0.00  | 0.01  | 0.01  | 0.00  | 0.00  | 0.02  | 0.01  | 0.01  | 0.02  |
| 16   | 6  | 0.01  | -0.01 | 0.02  | -0.09 | -0.02 | -0.07 | 0.04  | 0.00  | 0.04  |

|    |   |       |       |       |       |       |       |       |       |       |
|----|---|-------|-------|-------|-------|-------|-------|-------|-------|-------|
| 17 | 1 | 0.02  | -0.02 | 0.03  | -0.07 | -0.07 | -0.07 | 0.05  | 0.00  | 0.06  |
| 18 | 1 | 0.01  | -0.01 | 0.02  | -0.03 | -0.07 | -0.04 | 0.01  | 0.01  | 0.03  |
| 19 | 1 | -0.01 | -0.01 | 0.02  | -0.17 | -0.04 | -0.13 | 0.04  | 0.00  | 0.05  |
| 20 | 6 | 0.02  | -0.01 | 0.01  | 0.00  | 0.01  | -0.01 | 0.02  | 0.01  | 0.00  |
| 21 | 1 | 0.02  | 0.03  | 0.02  | -0.07 | -0.04 | 0.02  | 0.05  | 0.02  | -0.02 |
| 22 | 6 | -0.03 | 0.01  | 0.00  | 0.07  | -0.04 | 0.10  | -0.04 | 0.02  | -0.03 |
| 23 | 1 | -0.03 | -0.03 | 0.03  | 0.10  | 0.00  | 0.13  | -0.04 | 0.01  | 0.00  |
| 24 | 1 | -0.03 | 0.04  | -0.03 | 0.01  | -0.04 | 0.12  | -0.05 | 0.02  | -0.02 |
| 25 | 1 | -0.05 | 0.04  | 0.02  | 0.09  | -0.06 | 0.06  | -0.06 | 0.03  | -0.04 |
| 26 | 6 | 0.00  | 0.00  | -0.07 | 0.00  | 0.00  | 0.00  | -0.04 | -0.02 | -0.01 |
| 27 | 1 | 0.15  | 0.15  | -0.23 | 0.01  | 0.02  | -0.02 | 0.04  | -0.04 | -0.05 |
| 28 | 1 | -0.19 | -0.12 | -0.23 | 0.02  | -0.05 | -0.02 | -0.06 | -0.06 | -0.04 |
| 29 | 6 | -0.03 | 0.01  | 0.02  | 0.02  | 0.12  | 0.00  | -0.01 | -0.03 | -0.01 |
| 30 | 1 | -0.04 | -0.01 | 0.01  | 0.06  | 0.22  | 0.00  | -0.06 | -0.08 | 0.01  |
| 31 | 1 | -0.05 | 0.05  | 0.02  | 0.05  | 0.06  | 0.08  | -0.04 | 0.02  | -0.07 |
| 32 | 6 | 0.01  | 0.00  | -0.01 | 0.11  | -0.14 | 0.08  | -0.04 | 0.03  | -0.03 |
| 33 | 1 | 0.01  | 0.01  | -0.01 | 0.45  | -0.46 | 0.32  | -0.17 | 0.13  | -0.12 |
| 34 | 6 | 0.01  | 0.00  | -0.03 | -0.11 | 0.03  | -0.03 | 0.03  | -0.02 | 0.01  |
| 35 | 1 | 0.01  | 0.01  | -0.04 | 0.01  | -0.08 | 0.06  | -0.01 | 0.02  | -0.03 |
| 36 | 6 | -0.01 | 0.06  | -0.08 | 0.01  | 0.00  | -0.05 | 0.11  | -0.02 | 0.10  |
| 37 | 1 | -0.01 | 0.09  | -0.13 | 0.02  | -0.01 | -0.04 | 0.16  | -0.01 | 0.10  |
| 38 | 1 | 0.00  | 0.08  | -0.02 | 0.02  | -0.01 | -0.05 | 0.12  | -0.02 | 0.14  |
| 39 | 1 | -0.01 | 0.07  | -0.08 | 0.01  | 0.00  | -0.07 | 0.11  | -0.04 | 0.02  |
| 40 | 6 | -0.01 | -0.10 | 0.04  | 0.02  | 0.03  | -0.02 | 0.01  | 0.08  | 0.02  |
| 41 | 1 | -0.05 | -0.14 | 0.07  | 0.01  | 0.02  | -0.01 | 0.03  | 0.12  | -0.01 |
| 42 | 6 | -0.04 | -0.05 | -0.03 | 0.01  | -0.03 | 0.05  | 0.02  | -0.01 | 0.04  |
| 43 | 1 | -0.07 | -0.11 | 0.04  | 0.06  | -0.02 | 0.01  | 0.09  | 0.01  | -0.04 |
| 44 | 1 | -0.01 | -0.05 | -0.13 | 0.04  | -0.02 | 0.03  | 0.02  | -0.01 | 0.07  |
| 45 | 1 | -0.05 | -0.11 | -0.03 | 0.02  | -0.05 | 0.13  | 0.05  | 0.01  | 0.13  |
| 46 | 6 | -0.02 | 0.03  | 0.09  | 0.01  | 0.01  | -0.02 | 0.10  | 0.02  | -0.13 |
| 47 | 1 | -0.02 | 0.00  | 0.13  | 0.04  | -0.04 | 0.02  | 0.22  | -0.09 | -0.08 |
| 48 | 6 | 0.00  | 0.09  | 0.05  | -0.01 | 0.07  | 0.04  | 0.01  | 0.11  | 0.10  |
| 49 | 1 | -0.02 | 0.11  | 0.02  | 0.03  | 0.05  | 0.10  | 0.17  | -0.13 | 0.40  |
| 50 | 1 | 0.07  | 0.10  | 0.07  | -0.05 | 0.09  | 0.06  | -0.29 | 0.27  | 0.24  |
| 51 | 6 | -0.01 | 0.07  | 0.03  | -0.04 | 0.04  | 0.04  | -0.03 | 0.08  | 0.03  |
| 52 | 1 | 0.00  | 0.10  | 0.06  | -0.05 | 0.07  | 0.06  | -0.03 | 0.12  | 0.06  |
| 53 | 6 | -0.01 | -0.04 | -0.05 | 0.01  | -0.03 | -0.03 | -0.01 | -0.05 | -0.05 |
| 54 | 1 | -0.03 | -0.05 | -0.09 | 0.00  | -0.04 | -0.06 | -0.04 | -0.07 | -0.10 |
| 55 | 6 | -0.03 | 0.01  | -0.01 | -0.02 | 0.01  | 0.00  | -0.03 | 0.01  | -0.01 |
| 56 | 1 | -0.06 | 0.04  | 0.00  | -0.05 | 0.03  | 0.02  | -0.06 | 0.05  | 0.00  |
| 57 | 6 | 0.03  | -0.04 | -0.01 | 0.03  | -0.03 | -0.01 | 0.04  | -0.05 | 0.00  |
| 58 | 1 | 0.06  | -0.05 | 0.01  | 0.05  | -0.03 | 0.00  | 0.08  | -0.06 | 0.03  |
| 59 | 8 | 0.10  | -0.08 | 0.00  | -0.02 | 0.00  | 0.00  | 0.05  | 0.02  | 0.00  |
| 60 | 8 | 0.08  | 0.12  | 0.09  | 0.02  | 0.00  | 0.00  | -0.02 | -0.01 | -0.01 |
| 61 | 8 | -0.01 | 0.01  | 0.02  | -0.04 | -0.02 | -0.06 | -0.17 | -0.02 | -0.13 |
| 62 | 6 | -0.01 | 0.08  | -0.02 | 0.01  | -0.01 | 0.01  | -0.01 | 0.01  | -0.02 |
| 63 | 6 | -0.11 | 0.05  | -0.09 | 0.01  | -0.01 | 0.01  | -0.01 | 0.01  | -0.02 |
| 64 | 6 | 0.08  | -0.11 | 0.00  | -0.01 | 0.00  | 0.00  | 0.01  | 0.00  | 0.01  |
| 65 | 8 | 0.02  | 0.06  | -0.01 | -0.01 | -0.02 | 0.01  | 0.01  | 0.03  | -0.01 |
| 66 | 1 | 0.16  | -0.19 | 0.08  | -0.02 | 0.00  | -0.01 | 0.03  | 0.00  | 0.02  |
| 67 | 6 | -0.06 | -0.11 | -0.02 | 0.00  | 0.00  | 0.00  | 0.00  | 0.01  | 0.00  |
| 68 | 1 | -0.14 | -0.19 | -0.07 | 0.00  | 0.00  | 0.00  | 0.00  | 0.01  | 0.00  |

|    |   |       |       |       |       |       |       |       |       |       |
|----|---|-------|-------|-------|-------|-------|-------|-------|-------|-------|
| 69 | 1 | -0.09 | 0.06  | 0.03  | 0.00  | -0.01 | 0.00  | 0.00  | 0.03  | 0.00  |
| 70 | 1 | -0.15 | -0.15 | -0.05 | 0.01  | 0.00  | 0.00  | -0.01 | 0.00  | -0.01 |
| 71 | 6 | 0.01  | -0.02 | 0.01  | 0.00  | 0.00  | 0.00  | 0.01  | -0.01 | -0.01 |
| 72 | 1 | 0.02  | -0.04 | 0.09  | -0.01 | 0.01  | -0.01 | 0.01  | -0.02 | 0.01  |
| 73 | 1 | 0.18  | -0.11 | -0.09 | -0.02 | 0.01  | 0.01  | 0.04  | -0.01 | -0.02 |
| 74 | 1 | 0.00  | -0.03 | 0.18  | 0.00  | 0.00  | -0.02 | 0.00  | -0.01 | 0.02  |

|                |  |          |  |          |  |          |
|----------------|--|----------|--|----------|--|----------|
|                |  | 49       |  | 50       |  | 51       |
|                |  | A        |  | A        |  | A        |
| Frequencies -- |  | 475.6430 |  | 491.6461 |  | 508.9443 |
| Red. masses -- |  | 3.2820   |  | 4.5672   |  | 4.4223   |
| Frc consts --  |  | 0.4375   |  | 0.6504   |  | 0.6749   |
| IR Inten --    |  | 1.2962   |  | 11.3566  |  | 1.2889   |
| Raman Activ -- |  | 4.5398   |  | 3.7211   |  | 2.0690   |
| Depolar (P) -- |  | 0.0541   |  | 0.1218   |  | 0.2446   |
| Depolar (U) -- |  | 0.1026   |  | 0.2172   |  | 0.3931   |

| Atom | AN | X     | Y     | Z     | X     | Y     | Z     | X     | Y     | Z     |
|------|----|-------|-------|-------|-------|-------|-------|-------|-------|-------|
| 1    | 6  | 0.05  | -0.03 | -0.05 | -0.10 | 0.02  | 0.05  | -0.04 | 0.02  | 0.05  |
| 2    | 6  | -0.04 | -0.11 | -0.01 | -0.07 | 0.01  | 0.13  | -0.05 | 0.02  | 0.10  |
| 3    | 6  | 0.01  | -0.02 | -0.02 | -0.03 | 0.03  | 0.09  | -0.03 | 0.03  | -0.03 |
| 4    | 6  | 0.03  | -0.03 | 0.02  | 0.01  | 0.05  | -0.01 | -0.08 | -0.03 | -0.05 |
| 5    | 6  | 0.01  | -0.01 | 0.02  | 0.02  | 0.08  | -0.06 | -0.06 | -0.08 | 0.05  |
| 6    | 6  | 0.01  | 0.01  | -0.01 | -0.04 | 0.00  | 0.05  | 0.05  | -0.03 | -0.07 |
| 7    | 8  | -0.08 | -0.11 | 0.02  | 0.04  | -0.04 | -0.08 | 0.04  | -0.02 | -0.08 |
| 8    | 6  | 0.15  | 0.09  | -0.02 | 0.04  | 0.06  | 0.03  | 0.02  | 0.04  | -0.01 |
| 9    | 6  | 0.03  | 0.01  | -0.03 | -0.02 | -0.10 | -0.13 | 0.01  | -0.05 | -0.05 |
| 10   | 1  | 0.02  | 0.01  | -0.03 | -0.01 | -0.23 | -0.16 | 0.05  | -0.11 | -0.08 |
| 11   | 8  | -0.01 | 0.11  | 0.04  | 0.02  | -0.05 | -0.01 | 0.04  | -0.03 | -0.03 |
| 12   | 6  | 0.02  | -0.05 | -0.02 | 0.07  | -0.03 | -0.05 | 0.01  | -0.04 | -0.01 |
| 13   | 1  | 0.04  | -0.05 | -0.02 | 0.18  | -0.02 | -0.04 | 0.05  | -0.07 | 0.04  |
| 14   | 6  | 0.00  | 0.01  | 0.00  | 0.00  | 0.00  | 0.00  | 0.00  | -0.02 | 0.00  |
| 15   | 8  | 0.00  | 0.00  | 0.00  | -0.01 | 0.00  | 0.01  | 0.00  | 0.00  | -0.01 |
| 16   | 6  | 0.06  | -0.10 | 0.10  | 0.05  | -0.03 | 0.02  | -0.01 | -0.01 | 0.00  |
| 17   | 1  | 0.20  | -0.31 | 0.24  | 0.05  | -0.10 | -0.01 | 0.01  | -0.05 | 0.00  |
| 18   | 1  | 0.08  | -0.14 | 0.13  | 0.14  | -0.08 | 0.05  | 0.03  | -0.04 | 0.01  |
| 19   | 1  | -0.24 | -0.12 | 0.07  | -0.04 | -0.06 | -0.04 | -0.06 | -0.02 | -0.04 |
| 20   | 6  | 0.12  | 0.01  | -0.05 | -0.05 | -0.03 | -0.12 | -0.01 | -0.01 | -0.06 |
| 21   | 1  | 0.15  | -0.01 | -0.08 | 0.01  | -0.09 | -0.18 | -0.01 | -0.03 | -0.07 |
| 22   | 6  | 0.02  | 0.02  | -0.01 | -0.02 | -0.01 | -0.03 | 0.02  | -0.01 | -0.01 |
| 23   | 1  | 0.07  | 0.07  | 0.07  | -0.06 | 0.02  | -0.15 | 0.00  | 0.03  | -0.11 |
| 24   | 1  | -0.08 | 0.05  | 0.00  | 0.04  | -0.08 | 0.01  | 0.07  | -0.08 | 0.03  |
| 25   | 1  | 0.05  | -0.01 | -0.03 | 0.01  | -0.04 | -0.06 | 0.06  | -0.06 | -0.04 |
| 26   | 6  | -0.04 | 0.02  | 0.00  | 0.03  | 0.00  | -0.03 | 0.06  | -0.05 | 0.04  |
| 27   | 1  | -0.06 | 0.01  | 0.02  | 0.15  | 0.09  | -0.14 | -0.11 | -0.21 | 0.22  |
| 28   | 1  | -0.05 | 0.05  | 0.02  | -0.06 | -0.15 | -0.14 | 0.24  | 0.11  | 0.21  |
| 29   | 6  | -0.09 | 0.16  | -0.04 | -0.02 | 0.02  | -0.03 | 0.02  | 0.02  | -0.05 |
| 30   | 1  | -0.30 | -0.01 | 0.06  | -0.09 | -0.06 | -0.01 | 0.01  | 0.01  | -0.04 |
| 31   | 1  | -0.21 | 0.37  | -0.25 | -0.06 | 0.09  | -0.12 | 0.02  | 0.02  | -0.06 |
| 32   | 6  | 0.01  | 0.00  | 0.00  | -0.04 | 0.12  | 0.07  | -0.03 | 0.04  | 0.05  |
| 33   | 1  | -0.07 | -0.06 | -0.08 | -0.17 | 0.09  | -0.05 | -0.07 | -0.04 | 0.01  |
| 34   | 6  | -0.04 | 0.00  | 0.00  | -0.03 | 0.12  | 0.24  | -0.05 | 0.07  | 0.17  |
| 35   | 1  | -0.04 | 0.09  | -0.08 | -0.07 | 0.13  | 0.23  | -0.07 | 0.04  | 0.19  |
| 36   | 6  | 0.00  | 0.00  | 0.06  | 0.00  | -0.03 | -0.03 | -0.03 | 0.03  | -0.11 |

|    |   |       |       |       |       |       |       |       |       |       |
|----|---|-------|-------|-------|-------|-------|-------|-------|-------|-------|
| 37 | 1 | -0.02 | 0.03  | 0.01  | 0.01  | -0.09 | 0.06  | -0.03 | 0.05  | -0.15 |
| 38 | 1 | -0.04 | 0.03  | 0.07  | 0.02  | -0.08 | -0.11 | 0.00  | 0.05  | -0.04 |
| 39 | 1 | -0.01 | -0.01 | 0.10  | 0.00  | -0.05 | -0.07 | -0.03 | 0.06  | -0.14 |
| 40 | 6 | -0.05 | 0.00  | 0.01  | 0.04  | 0.04  | 0.02  | 0.05  | -0.04 | -0.06 |
| 41 | 1 | -0.07 | -0.02 | 0.03  | 0.08  | 0.12  | -0.05 | 0.08  | -0.07 | -0.01 |
| 42 | 6 | 0.00  | 0.01  | -0.02 | 0.00  | -0.04 | 0.09  | -0.01 | 0.04  | -0.11 |
| 43 | 1 | -0.02 | 0.00  | 0.00  | 0.07  | -0.03 | 0.03  | -0.09 | 0.07  | -0.05 |
| 44 | 1 | -0.01 | 0.01  | -0.02 | 0.05  | -0.04 | 0.07  | -0.06 | 0.05  | -0.04 |
| 45 | 1 | -0.01 | 0.01  | -0.04 | 0.02  | -0.07 | 0.19  | -0.03 | 0.09  | -0.25 |
| 46 | 6 | -0.02 | -0.01 | 0.00  | -0.04 | 0.02  | 0.00  | 0.08  | -0.02 | 0.04  |
| 47 | 1 | -0.04 | 0.02  | -0.02 | -0.08 | -0.01 | 0.07  | 0.19  | -0.01 | -0.06 |
| 48 | 6 | -0.01 | -0.05 | -0.03 | -0.04 | 0.03  | -0.02 | 0.09  | 0.01  | 0.07  |
| 49 | 1 | -0.03 | -0.04 | -0.05 | -0.06 | 0.17  | -0.10 | 0.12  | -0.18 | 0.18  |
| 50 | 1 | 0.00  | -0.06 | -0.04 | 0.07  | -0.05 | -0.10 | -0.03 | 0.13  | 0.19  |
| 51 | 6 | 0.01  | -0.03 | -0.02 | -0.06 | 0.01  | 0.06  | 0.09  | 0.01  | -0.06 |
| 52 | 1 | 0.02  | -0.05 | -0.04 | -0.09 | 0.04  | 0.07  | 0.12  | 0.00  | -0.06 |
| 53 | 6 | 0.00  | 0.01  | 0.02  | 0.03  | 0.00  | -0.02 | -0.04 | -0.01 | 0.00  |
| 54 | 1 | 0.01  | 0.02  | 0.04  | 0.04  | 0.00  | -0.02 | -0.06 | -0.02 | -0.01 |
| 55 | 6 | 0.01  | 0.00  | 0.00  | -0.01 | 0.00  | 0.01  | 0.00  | 0.00  | -0.03 |
| 56 | 1 | 0.03  | -0.01 | 0.00  | -0.03 | 0.00  | 0.04  | 0.02  | 0.01  | -0.05 |
| 57 | 6 | -0.01 | 0.02  | 0.01  | 0.02  | 0.00  | -0.02 | -0.02 | -0.02 | 0.02  |
| 58 | 1 | -0.03 | 0.02  | 0.00  | 0.02  | 0.00  | -0.03 | -0.01 | -0.02 | 0.04  |
| 59 | 8 | -0.04 | 0.01  | 0.00  | 0.03  | -0.09 | 0.01  | -0.02 | 0.07  | 0.00  |
| 60 | 8 | -0.03 | -0.01 | 0.00  | 0.01  | 0.01  | 0.00  | 0.07  | 0.03  | 0.03  |
| 61 | 8 | 0.00  | 0.01  | 0.04  | 0.11  | -0.06 | -0.12 | -0.18 | 0.07  | 0.16  |
| 62 | 6 | -0.02 | 0.01  | 0.00  | 0.01  | 0.00  | 0.01  | 0.02  | 0.02  | 0.02  |
| 63 | 6 | -0.01 | 0.02  | -0.03 | 0.01  | -0.01 | 0.02  | -0.02 | 0.02  | -0.01 |
| 64 | 6 | 0.02  | 0.00  | -0.01 | -0.01 | 0.00  | 0.00  | 0.01  | -0.02 | -0.01 |
| 65 | 8 | 0.01  | 0.03  | 0.01  | -0.01 | -0.02 | 0.00  | -0.02 | -0.02 | 0.02  |
| 66 | 1 | 0.04  | -0.01 | 0.01  | -0.02 | 0.00  | -0.01 | 0.03  | -0.04 | 0.01  |
| 67 | 6 | 0.00  | 0.00  | 0.00  | 0.00  | 0.00  | 0.00  | -0.01 | -0.02 | 0.00  |
| 68 | 1 | -0.01 | -0.02 | 0.00  | 0.00  | 0.00  | 0.00  | -0.03 | -0.05 | -0.01 |
| 69 | 1 | 0.00  | 0.03  | 0.01  | 0.00  | -0.01 | 0.00  | -0.01 | 0.00  | 0.01  |
| 70 | 1 | -0.01 | 0.00  | 0.00  | 0.01  | 0.00  | 0.00  | -0.02 | -0.02 | 0.00  |
| 71 | 6 | 0.01  | -0.01 | -0.02 | -0.01 | 0.01  | 0.00  | -0.01 | 0.00  | 0.01  |
| 72 | 1 | 0.02  | -0.03 | -0.01 | -0.01 | 0.02  | 0.00  | 0.00  | -0.02 | 0.02  |
| 73 | 1 | 0.04  | -0.03 | -0.03 | -0.03 | 0.02  | 0.02  | 0.03  | -0.01 | -0.01 |
| 74 | 1 | -0.01 | -0.02 | 0.02  | 0.00  | 0.02  | -0.02 | -0.03 | -0.01 | 0.04  |

|    |    |    |
|----|----|----|
| 52 | 53 | 54 |
| A  | A  | A  |

|                |          |          |          |
|----------------|----------|----------|----------|
| Frequencies -- | 538.3894 | 545.9651 | 556.9994 |
| Red. masses -- | 5.2221   | 4.3998   | 4.5356   |
| Frc consts --  | 0.8918   | 0.7727   | 0.8291   |
| IR Inten --    | 17.1612  | 0.9299   | 7.3496   |
| Raman Activ -- | 0.4714   | 3.7502   | 2.9236   |
| Depolar (P) -- | 0.4373   | 0.0627   | 0.7428   |
| Depolar (U) -- | 0.6085   | 0.1180   | 0.8524   |

| Atom | AN | X     | Y     | Z     | X    | Y     | Z     | X     | Y    | Z     |
|------|----|-------|-------|-------|------|-------|-------|-------|------|-------|
| 1    | 6  | -0.01 | -0.02 | -0.05 | 0.04 | -0.05 | -0.01 | -0.04 | 0.05 | 0.02  |
| 2    | 6  | 0.00  | -0.02 | -0.04 | 0.02 | -0.04 | 0.00  | -0.01 | 0.01 | -0.02 |
| 3    | 6  | 0.00  | -0.08 | -0.01 | 0.00 | -0.01 | -0.07 | -0.02 | 0.00 | 0.18  |
| 4    | 6  | 0.06  | -0.02 | -0.03 | 0.05 | 0.08  | 0.04  | -0.10 | 0.02 | -0.02 |

|    |   |       |       |       |       |       |       |       |       |       |
|----|---|-------|-------|-------|-------|-------|-------|-------|-------|-------|
| 5  | 6 | 0.08  | 0.09  | 0.02  | 0.03  | 0.00  | 0.02  | -0.07 | -0.02 | -0.04 |
| 6  | 6 | 0.16  | -0.02 | 0.13  | 0.04  | -0.03 | 0.00  | -0.06 | 0.00  | -0.04 |
| 7  | 8 | -0.05 | 0.01  | 0.07  | -0.05 | -0.01 | 0.04  | 0.01  | 0.00  | 0.00  |
| 8  | 6 | -0.01 | 0.00  | 0.04  | -0.01 | 0.03  | 0.04  | 0.08  | -0.04 | -0.06 |
| 9  | 6 | 0.00  | 0.01  | -0.02 | -0.05 | -0.01 | -0.07 | 0.00  | 0.03  | 0.04  |
| 10 | 1 | 0.01  | -0.01 | -0.02 | -0.05 | -0.12 | -0.09 | -0.02 | 0.06  | 0.05  |
| 11 | 8 | 0.00  | 0.03  | 0.00  | 0.00  | -0.01 | 0.01  | -0.04 | 0.04  | 0.04  |
| 12 | 6 | 0.03  | -0.01 | -0.02 | 0.05  | 0.15  | 0.02  | -0.03 | 0.04  | 0.01  |
| 13 | 1 | 0.00  | -0.03 | 0.00  | 0.16  | 0.15  | 0.03  | -0.04 | -0.01 | 0.06  |
| 14 | 6 | 0.02  | 0.01  | 0.00  | 0.01  | -0.01 | -0.01 | -0.02 | 0.00  | 0.02  |
| 15 | 8 | -0.03 | 0.00  | -0.04 | 0.00  | 0.00  | -0.01 | 0.00  | 0.00  | 0.01  |
| 16 | 6 | 0.03  | -0.01 | 0.01  | 0.02  | -0.01 | 0.00  | 0.06  | -0.01 | 0.06  |
| 17 | 1 | -0.01 | 0.00  | -0.04 | -0.02 | -0.02 | -0.07 | 0.14  | -0.03 | 0.18  |
| 18 | 1 | 0.08  | -0.01 | 0.02  | 0.11  | -0.04 | 0.02  | -0.07 | 0.03  | 0.03  |
| 19 | 1 | 0.05  | -0.01 | 0.00  | 0.02  | -0.03 | -0.05 | 0.02  | 0.01  | 0.13  |
| 20 | 6 | -0.03 | 0.01  | -0.02 | -0.06 | -0.02 | -0.06 | 0.05  | 0.02  | 0.01  |
| 21 | 1 | -0.01 | 0.02  | -0.03 | -0.04 | -0.10 | -0.10 | 0.07  | 0.05  | 0.01  |
| 22 | 6 | -0.04 | 0.03  | -0.05 | 0.04  | -0.04 | 0.05  | -0.05 | 0.04  | -0.04 |
| 23 | 1 | -0.02 | 0.02  | 0.02  | 0.05  | -0.05 | 0.08  | -0.05 | 0.03  | -0.04 |
| 24 | 1 | -0.08 | 0.08  | -0.07 | 0.02  | -0.03 | 0.05  | -0.04 | 0.03  | -0.03 |
| 25 | 1 | -0.06 | 0.06  | -0.01 | 0.03  | -0.03 | 0.04  | -0.05 | 0.04  | -0.04 |
| 26 | 6 | 0.23  | -0.03 | 0.04  | -0.07 | -0.05 | -0.01 | 0.10  | 0.02  | 0.01  |
| 27 | 1 | 0.02  | 0.06  | 0.12  | -0.06 | 0.00  | -0.04 | 0.07  | -0.13 | 0.10  |
| 28 | 1 | 0.43  | -0.09 | 0.11  | -0.14 | -0.05 | -0.04 | 0.23  | 0.05  | 0.09  |
| 29 | 6 | -0.02 | 0.00  | 0.01  | -0.02 | 0.02  | 0.01  | -0.03 | 0.02  | 0.02  |
| 30 | 1 | -0.04 | -0.03 | 0.02  | -0.03 | -0.01 | 0.01  | -0.08 | -0.02 | 0.05  |
| 31 | 1 | -0.02 | 0.01  | -0.03 | -0.03 | 0.03  | -0.01 | -0.08 | 0.12  | -0.01 |
| 32 | 6 | 0.00  | 0.03  | 0.02  | 0.03  | 0.04  | 0.05  | 0.01  | -0.07 | -0.15 |
| 33 | 1 | 0.00  | 0.10  | 0.03  | 0.06  | 0.07  | 0.07  | -0.07 | -0.05 | -0.22 |
| 34 | 6 | 0.03  | 0.00  | -0.05 | 0.01  | 0.05  | -0.03 | 0.02  | -0.09 | -0.07 |
| 35 | 1 | 0.06  | 0.05  | -0.09 | 0.02  | 0.12  | -0.09 | -0.06 | -0.12 | -0.04 |
| 36 | 6 | -0.01 | 0.01  | -0.03 | 0.01  | -0.01 | 0.08  | -0.01 | -0.02 | -0.11 |
| 37 | 1 | -0.07 | 0.03  | -0.09 | 0.01  | -0.04 | 0.13  | 0.07  | -0.08 | 0.02  |
| 38 | 1 | -0.05 | 0.03  | -0.03 | -0.05 | -0.02 | -0.01 | 0.07  | -0.07 | -0.12 |
| 39 | 1 | -0.02 | 0.02  | 0.08  | 0.00  | -0.06 | 0.14  | 0.00  | -0.03 | -0.26 |
| 40 | 6 | 0.13  | -0.10 | -0.13 | -0.07 | -0.09 | 0.01  | 0.11  | 0.11  | 0.00  |
| 41 | 1 | 0.15  | -0.19 | -0.03 | -0.09 | -0.12 | 0.03  | 0.17  | 0.23  | -0.09 |
| 42 | 6 | -0.05 | -0.06 | 0.15  | -0.02 | 0.00  | -0.01 | 0.01  | 0.01  | -0.04 |
| 43 | 1 | -0.17 | -0.09 | 0.28  | -0.07 | 0.02  | 0.02  | 0.05  | 0.04  | -0.10 |
| 44 | 1 | -0.11 | -0.06 | 0.15  | -0.07 | 0.00  | 0.05  | 0.09  | 0.01  | -0.05 |
| 45 | 1 | -0.09 | -0.02 | -0.04 | -0.03 | 0.05  | -0.10 | 0.02  | -0.05 | 0.05  |
| 46 | 6 | 0.01  | 0.08  | 0.03  | 0.01  | 0.00  | 0.00  | 0.03  | -0.02 | 0.00  |
| 47 | 1 | -0.09 | -0.01 | 0.23  | 0.00  | -0.01 | 0.02  | 0.11  | -0.01 | -0.09 |
| 48 | 6 | 0.01  | 0.04  | 0.02  | 0.01  | 0.01  | 0.01  | 0.03  | 0.00  | 0.02  |
| 49 | 1 | 0.02  | -0.06 | 0.08  | 0.01  | -0.10 | 0.05  | 0.05  | 0.10  | 0.00  |
| 50 | 1 | -0.12 | 0.08  | 0.04  | -0.06 | 0.07  | 0.07  | 0.09  | -0.05 | -0.03 |
| 51 | 6 | 0.07  | -0.01 | 0.04  | 0.05  | 0.01  | -0.03 | -0.05 | -0.01 | 0.03  |
| 52 | 1 | 0.02  | 0.01  | 0.03  | 0.05  | 0.02  | -0.03 | -0.04 | -0.01 | 0.03  |
| 53 | 6 | -0.04 | 0.02  | 0.01  | -0.02 | 0.00  | 0.01  | 0.03  | -0.01 | -0.03 |
| 54 | 1 | -0.07 | 0.02  | 0.01  | -0.04 | 0.00  | 0.02  | 0.06  | -0.01 | -0.04 |
| 55 | 6 | -0.01 | 0.00  | -0.04 | 0.00  | 0.00  | -0.01 | -0.01 | 0.00  | 0.02  |
| 56 | 1 | 0.02  | -0.02 | -0.06 | 0.02  | 0.00  | -0.03 | -0.04 | 0.01  | 0.04  |

|    |   |       |       |       |       |       |       |       |       |       |
|----|---|-------|-------|-------|-------|-------|-------|-------|-------|-------|
| 57 | 6 | -0.05 | 0.00  | 0.00  | -0.02 | 0.00  | 0.02  | 0.03  | 0.00  | -0.02 |
| 58 | 1 | -0.08 | 0.01  | 0.00  | -0.02 | 0.00  | 0.03  | 0.05  | -0.01 | -0.05 |
| 59 | 8 | -0.24 | 0.01  | 0.04  | 0.03  | 0.01  | -0.05 | -0.11 | -0.13 | 0.09  |
| 60 | 8 | 0.00  | 0.00  | 0.00  | 0.05  | 0.16  | 0.02  | 0.05  | 0.12  | 0.02  |
| 61 | 8 | -0.11 | -0.02 | -0.15 | -0.05 | 0.01  | 0.00  | 0.02  | 0.00  | 0.04  |
| 62 | 6 | -0.01 | 0.00  | 0.01  | 0.10  | 0.01  | -0.12 | 0.08  | 0.02  | -0.06 |
| 63 | 6 | 0.00  | 0.01  | 0.00  | 0.07  | -0.14 | 0.14  | 0.03  | -0.06 | 0.08  |
| 64 | 6 | 0.01  | 0.00  | -0.01 | -0.11 | -0.02 | 0.07  | -0.05 | -0.02 | 0.04  |
| 65 | 8 | 0.00  | 0.00  | 0.01  | 0.00  | -0.07 | -0.16 | -0.01 | -0.06 | -0.09 |
| 66 | 1 | 0.01  | 0.00  | -0.01 | -0.26 | 0.05  | -0.05 | -0.14 | 0.00  | -0.03 |
| 67 | 6 | 0.00  | 0.00  | 0.00  | -0.01 | -0.03 | -0.01 | -0.01 | -0.04 | -0.01 |
| 68 | 1 | -0.01 | -0.01 | 0.00  | 0.07  | 0.13  | 0.01  | 0.02  | 0.03  | 0.00  |
| 69 | 1 | 0.00  | 0.00  | 0.01  | 0.02  | -0.12 | -0.08 | 0.00  | -0.07 | -0.04 |
| 70 | 1 | 0.00  | 0.01  | 0.01  | 0.05  | -0.09 | -0.09 | 0.01  | -0.07 | -0.05 |
| 71 | 6 | 0.00  | 0.00  | 0.00  | -0.04 | 0.05  | 0.08  | -0.03 | 0.03  | 0.05  |
| 72 | 1 | 0.00  | 0.00  | -0.01 | -0.13 | 0.18  | 0.07  | -0.07 | 0.09  | 0.05  |
| 73 | 1 | 0.00  | -0.01 | 0.00  | -0.22 | 0.19  | 0.19  | -0.12 | 0.10  | 0.11  |
| 74 | 1 | 0.00  | 0.00  | 0.01  | 0.12  | 0.11  | -0.20 | 0.04  | 0.06  | -0.09 |

|                |  |          |  |          |  |          |
|----------------|--|----------|--|----------|--|----------|
|                |  | 55       |  | 56       |  | 57       |
|                |  | A        |  | A        |  | A        |
| Frequencies -- |  | 568.8606 |  | 590.7602 |  | 604.9991 |
| Red. masses -- |  | 4.1007   |  | 3.8287   |  | 3.9249   |
| Frc consts --  |  | 0.7818   |  | 0.7873   |  | 0.8464   |
| IR Inten --    |  | 7.2810   |  | 2.2255   |  | 11.1096  |
| Raman Activ -- |  | 1.6465   |  | 8.0984   |  | 1.2338   |
| Depolar (P) -- |  | 0.2158   |  | 0.0518   |  | 0.1665   |
| Depolar (U) -- |  | 0.3550   |  | 0.0986   |  | 0.2854   |

| Atom | AN | X     | Y     | Z     | X     | Y     | Z     | X     | Y     | Z     |
|------|----|-------|-------|-------|-------|-------|-------|-------|-------|-------|
| 1    | 6  | 0.05  | -0.06 | -0.06 | -0.02 | 0.01  | 0.00  | 0.00  | 0.03  | 0.04  |
| 2    | 6  | 0.02  | -0.08 | -0.08 | -0.03 | 0.05  | 0.02  | 0.04  | -0.01 | 0.02  |
| 3    | 6  | 0.08  | -0.06 | 0.05  | 0.02  | -0.01 | -0.02 | -0.02 | 0.03  | 0.04  |
| 4    | 6  | 0.01  | -0.07 | -0.03 | 0.04  | -0.07 | -0.05 | -0.02 | 0.08  | 0.00  |
| 5    | 6  | -0.03 | -0.07 | 0.00  | 0.06  | -0.03 | 0.04  | 0.03  | 0.00  | 0.02  |
| 6    | 6  | -0.07 | 0.06  | -0.01 | 0.06  | 0.09  | 0.10  | 0.05  | 0.00  | 0.05  |
| 7    | 8  | -0.10 | -0.04 | 0.10  | 0.05  | 0.01  | -0.04 | 0.01  | 0.01  | -0.02 |
| 8    | 6  | -0.08 | 0.04  | 0.10  | 0.00  | 0.00  | -0.03 | 0.02  | -0.05 | 0.01  |
| 9    | 6  | -0.04 | 0.01  | -0.08 | 0.07  | -0.03 | 0.06  | -0.11 | 0.07  | -0.08 |
| 10   | 1  | 0.00  | -0.08 | -0.11 | 0.05  | 0.05  | 0.08  | -0.13 | -0.04 | -0.09 |
| 11   | 8  | 0.07  | 0.01  | -0.04 | -0.03 | -0.03 | 0.00  | 0.00  | 0.07  | 0.03  |
| 12   | 6  | 0.00  | -0.02 | -0.01 | 0.03  | -0.06 | -0.02 | -0.05 | 0.10  | -0.04 |
| 13   | 1  | -0.03 | -0.05 | 0.03  | 0.01  | -0.11 | 0.03  | -0.06 | 0.13  | -0.06 |
| 14   | 6  | -0.02 | 0.01  | 0.02  | 0.03  | 0.01  | -0.02 | 0.06  | -0.01 | -0.06 |
| 15   | 8  | 0.00  | 0.00  | 0.01  | -0.01 | -0.01 | -0.03 | 0.01  | 0.00  | -0.02 |
| 16   | 6  | 0.00  | 0.00  | -0.03 | -0.04 | 0.01  | -0.01 | 0.06  | -0.01 | 0.03  |
| 17   | 1  | -0.12 | 0.04  | -0.21 | 0.00  | 0.00  | 0.05  | 0.03  | 0.02  | 0.00  |
| 18   | 1  | 0.19  | -0.05 | 0.01  | -0.09 | 0.01  | -0.02 | 0.05  | 0.02  | 0.01  |
| 19   | 1  | 0.07  | -0.03 | -0.13 | -0.07 | 0.01  | 0.01  | 0.13  | 0.00  | 0.07  |
| 20   | 6  | -0.10 | 0.01  | -0.06 | 0.06  | -0.01 | 0.06  | -0.06 | 0.02  | -0.07 |
| 21   | 1  | -0.08 | -0.05 | -0.10 | 0.03  | 0.06  | 0.11  | -0.02 | -0.08 | -0.14 |
| 22   | 6  | -0.02 | -0.01 | 0.02  | -0.02 | 0.02  | -0.03 | 0.03  | -0.04 | 0.05  |
| 23   | 1  | 0.01  | -0.08 | 0.16  | -0.02 | 0.05  | -0.05 | 0.00  | -0.06 | -0.01 |
| 24   | 1  | -0.09 | 0.04  | -0.01 | -0.01 | 0.05  | -0.05 | 0.08  | -0.11 | 0.10  |

|    |   |       |       |       |       |       |       |       |       |       |
|----|---|-------|-------|-------|-------|-------|-------|-------|-------|-------|
| 25 | 1 | -0.10 | 0.05  | 0.02  | 0.02  | 0.01  | 0.00  | -0.01 | -0.04 | -0.01 |
| 26 | 6 | 0.03  | 0.13  | 0.00  | -0.01 | 0.20  | 0.00  | -0.06 | 0.04  | 0.01  |
| 27 | 1 | 0.05  | 0.04  | 0.03  | 0.09  | 0.37  | -0.15 | 0.06  | 0.17  | -0.13 |
| 28 | 1 | 0.07  | 0.14  | 0.02  | -0.20 | 0.10  | -0.14 | -0.22 | -0.05 | -0.12 |
| 29 | 6 | 0.02  | -0.03 | -0.02 | 0.00  | 0.00  | 0.00  | -0.02 | -0.01 | 0.04  |
| 30 | 1 | 0.02  | -0.05 | -0.04 | 0.03  | 0.03  | -0.01 | -0.07 | -0.05 | 0.06  |
| 31 | 1 | 0.05  | -0.10 | -0.07 | 0.01  | 0.00  | 0.05  | -0.04 | 0.02  | -0.02 |
| 32 | 6 | 0.02  | 0.12  | 0.14  | -0.03 | -0.01 | -0.01 | 0.01  | -0.06 | -0.06 |
| 33 | 1 | 0.10  | 0.25  | 0.22  | -0.01 | -0.09 | -0.01 | -0.06 | 0.01  | -0.11 |
| 34 | 6 | 0.06  | 0.08  | -0.07 | -0.02 | 0.00  | 0.07  | 0.00  | -0.05 | -0.05 |
| 35 | 1 | 0.20  | 0.23  | -0.20 | -0.01 | -0.08 | 0.14  | -0.13 | -0.03 | -0.07 |
| 36 | 6 | -0.02 | -0.01 | -0.05 | -0.02 | 0.01  | -0.07 | -0.02 | 0.00  | -0.05 |
| 37 | 1 | -0.02 | 0.02  | -0.10 | -0.08 | 0.05  | -0.18 | 0.00  | -0.07 | 0.06  |
| 38 | 1 | -0.02 | 0.02  | -0.01 | -0.05 | 0.05  | -0.04 | -0.03 | -0.05 | -0.16 |
| 39 | 1 | -0.02 | 0.00  | -0.03 | -0.03 | 0.04  | 0.03  | -0.02 | -0.05 | -0.08 |
| 40 | 6 | 0.03  | 0.14  | 0.02  | -0.07 | 0.09  | 0.06  | -0.05 | 0.06  | 0.06  |
| 41 | 1 | -0.03 | 0.14  | 0.00  | -0.15 | 0.09  | 0.03  | -0.06 | 0.14  | -0.03 |
| 42 | 6 | 0.01  | 0.00  | -0.04 | -0.03 | -0.05 | 0.08  | -0.04 | -0.03 | 0.07  |
| 43 | 1 | 0.06  | -0.06 | -0.05 | -0.10 | -0.18 | 0.22  | -0.11 | -0.06 | 0.15  |
| 44 | 1 | 0.10  | -0.01 | -0.17 | -0.03 | -0.06 | -0.12 | -0.10 | -0.04 | 0.05  |
| 45 | 1 | 0.02  | -0.11 | 0.09  | -0.06 | -0.13 | 0.04  | -0.06 | 0.00  | -0.04 |
| 46 | 6 | 0.03  | -0.04 | -0.05 | 0.08  | -0.01 | -0.08 | 0.04  | 0.00  | -0.03 |
| 47 | 1 | 0.07  | 0.00  | -0.13 | 0.04  | 0.00  | -0.04 | 0.03  | -0.01 | -0.01 |
| 48 | 6 | 0.01  | -0.06 | -0.01 | 0.06  | -0.14 | -0.04 | 0.04  | -0.05 | -0.02 |
| 49 | 1 | 0.06  | 0.07  | 0.00  | 0.14  | -0.12 | 0.05  | 0.05  | -0.19 | 0.05  |
| 50 | 1 | 0.03  | -0.15 | -0.11 | -0.10 | -0.20 | -0.13 | -0.07 | 0.03  | 0.05  |
| 51 | 6 | -0.08 | -0.05 | 0.05  | 0.02  | -0.11 | 0.03  | 0.09  | -0.02 | -0.06 |
| 52 | 1 | -0.07 | -0.08 | 0.02  | -0.01 | -0.18 | -0.05 | 0.05  | -0.02 | -0.09 |
| 53 | 6 | 0.04  | 0.00  | -0.02 | -0.01 | 0.03  | 0.02  | -0.05 | 0.01  | 0.05  |
| 54 | 1 | 0.08  | 0.00  | -0.03 | -0.02 | 0.04  | 0.05  | -0.11 | 0.02  | 0.10  |
| 55 | 6 | -0.01 | 0.00  | 0.03  | 0.00  | 0.00  | -0.01 | 0.01  | 0.00  | -0.02 |
| 56 | 1 | -0.04 | 0.00  | 0.06  | 0.02  | -0.03 | -0.01 | 0.06  | -0.01 | -0.06 |
| 57 | 6 | 0.03  | 0.01  | -0.03 | -0.03 | 0.02  | 0.00  | -0.05 | 0.01  | 0.04  |
| 58 | 1 | 0.04  | 0.01  | -0.06 | -0.10 | 0.03  | 0.01  | -0.14 | 0.02  | 0.14  |
| 59 | 8 | -0.01 | -0.02 | 0.05  | 0.05  | -0.01 | 0.00  | 0.03  | -0.06 | -0.02 |
| 60 | 8 | 0.07  | 0.00  | 0.00  | -0.05 | 0.05  | 0.03  | 0.13  | -0.02 | -0.06 |
| 61 | 8 | -0.04 | 0.01  | 0.07  | -0.12 | -0.01 | -0.02 | -0.03 | -0.01 | -0.02 |
| 62 | 6 | 0.02  | 0.01  | 0.03  | 0.02  | 0.01  | -0.05 | 0.01  | 0.04  | 0.09  |
| 63 | 6 | -0.01 | 0.03  | -0.01 | 0.02  | -0.05 | 0.02  | -0.01 | 0.11  | 0.01  |
| 64 | 6 | 0.01  | -0.01 | -0.01 | -0.04 | -0.01 | 0.03  | 0.08  | 0.00  | -0.08 |
| 65 | 8 | -0.02 | -0.02 | 0.02  | 0.01  | 0.01  | -0.06 | -0.04 | -0.10 | 0.10  |
| 66 | 1 | 0.03  | -0.03 | 0.00  | -0.07 | 0.03  | 0.00  | 0.08  | -0.08 | -0.05 |
| 67 | 6 | 0.00  | -0.02 | 0.00  | 0.00  | 0.00  | 0.00  | -0.01 | -0.03 | -0.01 |
| 68 | 1 | -0.02 | -0.05 | -0.01 | 0.03  | 0.07  | 0.00  | -0.10 | -0.22 | -0.03 |
| 69 | 1 | -0.01 | 0.00  | 0.01  | 0.01  | -0.03 | -0.04 | -0.04 | 0.04  | 0.09  |
| 70 | 1 | -0.02 | 0.00  | 0.02  | 0.02  | -0.04 | -0.04 | -0.06 | 0.05  | 0.09  |
| 71 | 6 | -0.01 | 0.00  | 0.01  | 0.00  | 0.01  | 0.01  | -0.04 | -0.01 | 0.04  |
| 72 | 1 | 0.01  | -0.02 | 0.00  | -0.03 | 0.05  | 0.03  | 0.04  | -0.10 | -0.06 |
| 73 | 1 | 0.02  | -0.02 | -0.01 | -0.04 | 0.07  | 0.04  | -0.03 | -0.10 | 0.02  |
| 74 | 1 | -0.04 | -0.01 | 0.05  | 0.05  | 0.03  | -0.09 | -0.16 | -0.06 | 0.19  |

58

A

59

A

60

A

|                |          |          |          |
|----------------|----------|----------|----------|
| Frequencies -- | 616.8961 | 619.5628 | 631.4857 |
| Red. masses -- | 3.5399   | 3.5870   | 4.2551   |
| Frc consts --  | 0.7937   | 0.8113   | 0.9998   |
| IR Inten --    | 4.4856   | 14.5359  | 9.1836   |
| Raman Activ -- | 1.6795   | 2.8210   | 2.2760   |
| Depolar (P) -- | 0.3383   | 0.5603   | 0.4134   |
| Depolar (U) -- | 0.5056   | 0.7182   | 0.5849   |

| Atom | AN | X     | Y     | Z     | X     | Y     | Z     | X     | Y     | Z     |
|------|----|-------|-------|-------|-------|-------|-------|-------|-------|-------|
| 1    | 6  | 0.03  | 0.03  | 0.00  | -0.01 | -0.01 | 0.00  | -0.07 | -0.05 | 0.03  |
| 2    | 6  | 0.05  | 0.03  | 0.05  | -0.02 | -0.01 | -0.02 | -0.07 | -0.04 | -0.04 |
| 3    | 6  | 0.00  | -0.03 | -0.08 | -0.01 | 0.02  | 0.03  | -0.07 | 0.06  | 0.02  |
| 4    | 6  | 0.02  | -0.03 | 0.02  | -0.01 | 0.02  | -0.01 | -0.03 | 0.17  | 0.03  |
| 5    | 6  | 0.02  | 0.03  | 0.00  | 0.00  | 0.00  | 0.00  | 0.01  | 0.09  | -0.03 |
| 6    | 6  | 0.00  | 0.04  | -0.01 | 0.01  | -0.02 | 0.01  | 0.02  | -0.03 | -0.03 |
| 7    | 8  | 0.05  | 0.05  | -0.06 | -0.02 | -0.02 | 0.02  | -0.06 | -0.06 | 0.06  |
| 8    | 6  | 0.01  | -0.04 | 0.01  | 0.00  | 0.01  | -0.01 | 0.02  | 0.04  | -0.04 |
| 9    | 6  | -0.07 | 0.04  | -0.05 | 0.02  | -0.01 | 0.02  | 0.04  | -0.03 | 0.05  |
| 10   | 1  | -0.07 | -0.06 | -0.07 | 0.02  | 0.02  | 0.03  | 0.01  | 0.10  | 0.09  |
| 11   | 8  | 0.00  | 0.05  | 0.03  | 0.00  | -0.02 | -0.01 | -0.01 | -0.08 | -0.03 |
| 12   | 6  | -0.03 | 0.02  | 0.01  | 0.01  | 0.00  | -0.01 | 0.03  | 0.10  | -0.04 |
| 13   | 1  | -0.05 | 0.02  | 0.02  | 0.02  | 0.01  | -0.02 | 0.10  | 0.19  | -0.12 |
| 14   | 6  | -0.09 | 0.04  | 0.12  | -0.01 | 0.00  | 0.00  | -0.05 | 0.03  | 0.08  |
| 15   | 8  | -0.09 | 0.01  | 0.04  | -0.18 | 0.04  | 0.19  | -0.02 | -0.01 | -0.04 |
| 16   | 6  | 0.05  | -0.01 | 0.03  | -0.02 | 0.00  | -0.01 | -0.05 | 0.01  | -0.03 |
| 17   | 1  | 0.02  | 0.03  | -0.01 | 0.00  | -0.01 | 0.01  | 0.02  | -0.06 | 0.06  |
| 18   | 1  | 0.04  | 0.02  | 0.01  | -0.02 | 0.00  | 0.00  | -0.08 | -0.01 | -0.01 |
| 19   | 1  | 0.11  | 0.00  | 0.05  | -0.04 | 0.00  | -0.02 | -0.16 | 0.00  | -0.03 |
| 20   | 6  | -0.04 | 0.04  | -0.07 | 0.02  | -0.02 | 0.03  | 0.06  | -0.07 | 0.09  |
| 21   | 1  | -0.01 | -0.02 | -0.11 | 0.01  | 0.00  | 0.04  | 0.03  | -0.03 | 0.12  |
| 22   | 6  | 0.01  | -0.02 | 0.01  | 0.00  | 0.01  | 0.00  | 0.01  | 0.00  | 0.01  |
| 23   | 1  | -0.02 | -0.07 | 0.00  | 0.01  | 0.03  | 0.00  | 0.04  | 0.12  | -0.05 |
| 24   | 1  | 0.04  | -0.09 | 0.06  | -0.01 | 0.03  | -0.02 | 0.02  | 0.08  | -0.05 |
| 25   | 1  | -0.06 | 0.00  | -0.06 | 0.03  | 0.00  | 0.03  | 0.17  | -0.06 | 0.11  |
| 26   | 6  | 0.03  | 0.04  | 0.00  | -0.01 | -0.01 | 0.00  | -0.02 | -0.06 | 0.00  |
| 27   | 1  | -0.07 | 0.04  | 0.05  | 0.03  | 0.00  | -0.03 | 0.01  | -0.03 | -0.04 |
| 28   | 1  | 0.04  | 0.11  | 0.04  | -0.04 | -0.04 | -0.02 | -0.09 | -0.05 | -0.03 |
| 29   | 6  | -0.02 | -0.01 | 0.02  | 0.01  | 0.00  | -0.01 | 0.01  | 0.02  | -0.02 |
| 30   | 1  | -0.06 | -0.04 | 0.04  | 0.02  | 0.02  | -0.01 | 0.06  | 0.07  | -0.04 |
| 31   | 1  | -0.04 | 0.02  | -0.03 | 0.01  | -0.01 | 0.01  | 0.03  | 0.02  | 0.05  |
| 32   | 6  | -0.04 | -0.08 | -0.01 | 0.02  | 0.03  | 0.00  | 0.08  | 0.08  | -0.04 |
| 33   | 1  | -0.13 | -0.08 | -0.08 | 0.05  | 0.03  | 0.03  | 0.17  | 0.05  | 0.03  |
| 34   | 6  | -0.06 | -0.05 | 0.03  | 0.02  | 0.02  | -0.01 | 0.07  | 0.07  | -0.04 |
| 35   | 1  | -0.20 | -0.06 | 0.04  | 0.07  | 0.02  | -0.01 | 0.20  | 0.06  | -0.03 |
| 36   | 6  | 0.02  | 0.00  | 0.08  | -0.01 | 0.00  | -0.03 | 0.00  | 0.00  | -0.02 |
| 37   | 1  | 0.00  | 0.04  | 0.02  | 0.00  | -0.02 | 0.00  | 0.07  | -0.11 | 0.18  |
| 38   | 1  | 0.01  | 0.03  | 0.12  | -0.01 | -0.02 | -0.06 | 0.01  | -0.08 | -0.18 |
| 39   | 1  | 0.02  | 0.02  | 0.11  | -0.01 | -0.01 | -0.05 | 0.00  | -0.07 | -0.11 |
| 40   | 6  | -0.02 | -0.11 | -0.02 | 0.00  | 0.04  | 0.01  | -0.03 | -0.03 | 0.02  |
| 41   | 1  | -0.06 | -0.22 | 0.07  | 0.01  | 0.09  | -0.03 | 0.01  | 0.05  | -0.04 |
| 42   | 6  | 0.03  | 0.02  | -0.05 | -0.01 | -0.01 | 0.02  | 0.03  | 0.02  | -0.03 |
| 43   | 1  | 0.07  | -0.02 | -0.07 | -0.03 | 0.00  | 0.04  | 0.06  | 0.07  | -0.09 |
| 44   | 1  | 0.09  | 0.02  | -0.14 | -0.04 | -0.01 | 0.06  | 0.03  | 0.02  | 0.05  |



|    |   |       |       |       |       |       |       |       |       |       |
|----|---|-------|-------|-------|-------|-------|-------|-------|-------|-------|
| 45 | 1 | 0.04  | -0.05 | 0.04  | -0.02 | 0.02  | -0.02 | 0.04  | 0.05  | -0.01 |
| 46 | 6 | 0.04  | 0.03  | 0.01  | -0.01 | -0.01 | 0.00  | 0.08  | 0.03  | 0.06  |
| 47 | 1 | 0.00  | 0.02  | 0.05  | 0.00  | -0.01 | -0.01 | 0.08  | 0.01  | 0.09  |
| 48 | 6 | 0.03  | -0.06 | 0.02  | 0.00  | 0.01  | -0.01 | 0.12  | -0.08 | 0.05  |
| 49 | 1 | 0.08  | 0.19  | -0.02 | -0.02 | -0.08 | 0.00  | 0.14  | 0.06  | 0.02  |
| 50 | 1 | 0.07  | -0.26 | -0.19 | -0.03 | 0.07  | 0.06  | 0.11  | -0.21 | -0.10 |
| 51 | 6 | -0.08 | -0.10 | 0.15  | 0.03  | 0.02  | -0.05 | 0.02  | -0.11 | 0.10  |
| 52 | 1 | -0.03 | -0.16 | 0.12  | 0.02  | 0.04  | -0.04 | 0.05  | -0.17 | 0.07  |
| 53 | 6 | 0.05  | 0.02  | -0.06 | -0.12 | 0.02  | 0.12  | 0.05  | 0.02  | -0.07 |
| 54 | 1 | 0.16  | 0.00  | -0.15 | -0.07 | 0.00  | 0.07  | 0.10  | 0.01  | -0.13 |
| 55 | 6 | 0.01  | 0.00  | -0.03 | 0.18  | -0.03 | -0.17 | -0.05 | 0.00  | 0.01  |
| 56 | 1 | 0.03  | -0.04 | -0.03 | 0.50  | -0.09 | -0.50 | -0.12 | -0.02 | 0.10  |
| 57 | 6 | 0.08  | -0.01 | -0.12 | 0.13  | -0.03 | -0.12 | 0.00  | 0.00  | -0.04 |
| 58 | 1 | 0.27  | -0.04 | -0.38 | 0.33  | -0.06 | -0.30 | 0.07  | -0.01 | -0.17 |
| 59 | 8 | 0.01  | 0.04  | -0.02 | 0.00  | -0.02 | 0.00  | 0.02  | -0.05 | -0.03 |
| 60 | 8 | 0.05  | 0.00  | -0.01 | -0.01 | 0.00  | 0.00  | -0.03 | -0.04 | -0.05 |
| 61 | 8 | -0.06 | 0.02  | -0.03 | 0.01  | -0.01 | 0.01  | -0.11 | 0.04  | -0.04 |
| 62 | 6 | 0.02  | 0.01  | 0.01  | -0.01 | 0.00  | 0.00  | -0.07 | 0.01  | 0.03  |
| 63 | 6 | 0.00  | 0.02  | 0.00  | 0.00  | 0.00  | 0.00  | 0.02  | 0.04  | 0.01  |
| 64 | 6 | 0.01  | 0.00  | -0.01 | 0.00  | 0.00  | 0.00  | 0.04  | 0.01  | -0.04 |
| 65 | 8 | -0.01 | -0.02 | 0.01  | 0.00  | 0.00  | 0.00  | 0.00  | -0.03 | 0.05  |
| 66 | 1 | 0.01  | -0.02 | 0.00  | 0.00  | 0.00  | 0.00  | 0.01  | 0.00  | -0.06 |
| 67 | 6 | 0.00  | -0.01 | 0.00  | 0.00  | 0.00  | 0.00  | 0.00  | 0.01  | 0.00  |
| 68 | 1 | -0.02 | -0.04 | -0.01 | 0.00  | 0.00  | 0.00  | -0.05 | -0.09 | -0.01 |
| 69 | 1 | -0.01 | 0.00  | 0.01  | 0.00  | 0.00  | 0.00  | -0.02 | 0.05  | 0.05  |
| 70 | 1 | -0.01 | 0.00  | 0.01  | 0.00  | 0.00  | 0.00  | -0.02 | 0.05  | 0.05  |
| 71 | 6 | -0.01 | 0.00  | 0.01  | 0.00  | 0.00  | 0.00  | -0.01 | -0.01 | 0.01  |
| 72 | 1 | 0.00  | -0.01 | 0.00  | 0.00  | 0.00  | -0.01 | 0.03  | -0.05 | -0.06 |
| 73 | 1 | 0.00  | -0.01 | 0.01  | 0.00  | 0.00  | 0.00  | -0.04 | -0.05 | 0.02  |
| 74 | 1 | -0.03 | -0.01 | 0.04  | 0.00  | 0.00  | 0.00  | -0.07 | -0.03 | 0.07  |

|                |          |          |          |
|----------------|----------|----------|----------|
|                | 61       | 62       | 63       |
|                | A        | A        | A        |
| Frequencies -- | 646.4378 | 668.8650 | 686.9578 |
| Red. masses -- | 3.7871   | 4.6206   | 2.6209   |
| Frc consts --  | 0.9324   | 1.2179   | 0.7287   |
| IR Inten --    | 11.8100  | 12.8788  | 5.4224   |
| Raman Activ -- | 0.5746   | 0.9188   | 1.4738   |
| Depolar (P) -- | 0.7426   | 0.4769   | 0.2819   |
| Depolar (U) -- | 0.8523   | 0.6458   | 0.4398   |

|    |      |       |       |       |       |       |       |       |       |       |   |
|----|------|-------|-------|-------|-------|-------|-------|-------|-------|-------|---|
|    | Atom | AN    | X     | Y     | Z     | X     | Y     | Z     | X     | Y     | Z |
| 1  | 6    | 0.01  | -0.02 | -0.04 | -0.01 | 0.00  | 0.00  | -0.02 | -0.01 | 0.01  |   |
| 2  | 6    | -0.03 | 0.03  | -0.01 | 0.02  | 0.05  | -0.02 | -0.02 | 0.00  | 0.01  |   |
| 3  | 6    | 0.03  | -0.03 | -0.03 | 0.04  | -0.01 | 0.04  | 0.00  | 0.01  | -0.01 |   |
| 4  | 6    | 0.03  | -0.07 | 0.00  | 0.17  | 0.03  | -0.04 | 0.02  | 0.03  | -0.01 |   |
| 5  | 6    | 0.01  | -0.05 | 0.03  | 0.05  | -0.01 | 0.00  | 0.02  | -0.07 | 0.07  |   |
| 6  | 6    | 0.00  | 0.02  | 0.01  | -0.02 | -0.05 | -0.03 | 0.09  | 0.00  | 0.03  |   |
| 7  | 8    | 0.01  | 0.00  | 0.00  | 0.04  | 0.05  | -0.01 | -0.01 | -0.01 | 0.00  |   |
| 8  | 6    | 0.02  | 0.04  | -0.04 | -0.08 | -0.08 | 0.08  | 0.02  | 0.00  | -0.02 |   |
| 9  | 6    | -0.01 | -0.02 | 0.05  | 0.15  | -0.02 | -0.08 | -0.02 | 0.01  | 0.01  |   |
| 10 | 1    | -0.09 | 0.14  | 0.12  | 0.13  | -0.09 | -0.08 | -0.03 | 0.02  | 0.01  |   |
| 11 | 8    | -0.01 | -0.09 | -0.02 | -0.05 | 0.13  | 0.04  | 0.00  | -0.02 | 0.00  |   |
| 12 | 6    | -0.06 | -0.03 | -0.10 | 0.24  | -0.04 | -0.13 | -0.02 | 0.06  | 0.02  |   |

|    |   |       |       |       |       |       |       |       |       |       |
|----|---|-------|-------|-------|-------|-------|-------|-------|-------|-------|
| 13 | 1 | -0.10 | -0.05 | -0.08 | 0.37  | -0.01 | -0.16 | -0.03 | 0.07  | 0.01  |
| 14 | 6 | -0.02 | 0.00  | 0.01  | -0.05 | 0.01  | 0.04  | -0.16 | 0.03  | 0.15  |
| 15 | 8 | 0.01  | 0.00  | 0.01  | 0.01  | 0.00  | 0.00  | 0.01  | 0.00  | -0.01 |
| 16 | 6 | -0.04 | 0.01  | -0.03 | -0.01 | 0.00  | 0.01  | 0.01  | 0.00  | 0.00  |
| 17 | 1 | 0.03  | -0.04 | 0.07  | -0.13 | 0.09  | -0.13 | 0.03  | -0.01 | 0.03  |
| 18 | 1 | -0.10 | -0.01 | -0.01 | 0.05  | 0.05  | -0.03 | -0.02 | 0.00  | 0.00  |
| 19 | 1 | -0.14 | 0.01  | -0.03 | 0.17  | 0.02  | 0.05  | -0.01 | 0.00  | 0.01  |
| 20 | 6 | 0.08  | -0.02 | 0.08  | 0.01  | -0.04 | -0.01 | -0.01 | -0.01 | 0.00  |
| 21 | 1 | 0.06  | 0.04  | 0.11  | 0.00  | -0.04 | -0.01 | -0.01 | -0.01 | 0.00  |
| 22 | 6 | -0.03 | 0.03  | -0.05 | -0.02 | 0.01  | -0.02 | 0.00  | 0.00  | 0.00  |
| 23 | 1 | 0.00  | 0.05  | 0.01  | -0.02 | 0.00  | -0.01 | 0.00  | 0.02  | -0.02 |
| 24 | 1 | -0.08 | 0.11  | -0.10 | -0.02 | 0.03  | -0.04 | 0.01  | 0.01  | -0.01 |
| 25 | 1 | 0.00  | 0.03  | 0.01  | -0.03 | 0.03  | 0.00  | 0.03  | -0.02 | 0.02  |
| 26 | 6 | 0.03  | 0.02  | 0.00  | -0.06 | -0.07 | 0.00  | 0.01  | 0.03  | 0.01  |
| 27 | 1 | -0.02 | 0.00  | 0.04  | -0.01 | -0.13 | 0.00  | 0.03  | 0.08  | -0.02 |
| 28 | 1 | 0.08  | 0.04  | 0.03  | -0.03 | -0.06 | 0.01  | -0.03 | 0.02  | -0.02 |
| 29 | 6 | 0.02  | 0.01  | -0.03 | -0.08 | 0.00  | 0.13  | 0.00  | 0.00  | -0.01 |
| 30 | 1 | 0.06  | 0.05  | -0.05 | -0.10 | -0.05 | 0.14  | 0.01  | 0.00  | -0.01 |
| 31 | 1 | 0.03  | 0.01  | 0.04  | -0.06 | -0.07 | 0.04  | 0.00  | 0.01  | 0.01  |
| 32 | 6 | -0.02 | 0.02  | 0.02  | -0.07 | -0.03 | 0.03  | 0.03  | 0.01  | -0.04 |
| 33 | 1 | 0.03  | -0.07 | 0.04  | -0.05 | 0.03  | 0.06  | 0.03  | -0.02 | -0.04 |
| 34 | 6 | -0.01 | 0.02  | 0.06  | -0.01 | -0.06 | -0.02 | 0.01  | 0.02  | 0.01  |
| 35 | 1 | 0.08  | -0.03 | 0.11  | -0.01 | -0.10 | 0.02  | 0.01  | 0.00  | 0.02  |
| 36 | 6 | 0.02  | -0.02 | 0.11  | -0.01 | -0.01 | -0.05 | -0.02 | 0.01  | -0.05 |
| 37 | 1 | -0.04 | 0.01  | 0.03  | -0.13 | -0.04 | -0.08 | -0.04 | -0.01 | -0.04 |
| 38 | 1 | -0.02 | 0.01  | 0.11  | -0.15 | -0.01 | -0.21 | -0.06 | 0.01  | -0.09 |
| 39 | 1 | 0.01  | -0.01 | 0.20  | -0.04 | -0.06 | 0.19  | -0.03 | -0.02 | 0.01  |
| 40 | 6 | 0.02  | -0.02 | -0.02 | 0.00  | 0.07  | 0.02  | -0.01 | 0.00  | 0.01  |
| 41 | 1 | -0.01 | -0.09 | 0.03  | 0.04  | 0.13  | -0.03 | -0.03 | 0.02  | -0.01 |
| 42 | 6 | 0.00  | 0.00  | -0.01 | 0.02  | 0.01  | -0.04 | 0.00  | -0.02 | 0.04  |
| 43 | 1 | -0.02 | -0.03 | 0.02  | 0.04  | 0.08  | -0.09 | -0.12 | -0.09 | 0.18  |
| 44 | 1 | 0.00  | 0.00  | -0.06 | 0.00  | 0.02  | 0.07  | -0.12 | -0.03 | 0.02  |
| 45 | 1 | -0.01 | -0.02 | -0.02 | 0.03  | 0.07  | -0.04 | -0.04 | 0.04  | -0.15 |
| 46 | 6 | -0.04 | -0.01 | -0.04 | -0.03 | -0.05 | 0.02  | -0.04 | -0.04 | -0.10 |
| 47 | 1 | -0.05 | 0.00  | -0.03 | -0.05 | -0.02 | 0.00  | -0.04 | -0.03 | -0.12 |
| 48 | 6 | -0.06 | 0.04  | -0.02 | -0.01 | 0.01  | 0.00  | -0.06 | 0.03  | -0.07 |
| 49 | 1 | -0.06 | 0.03  | -0.01 | -0.02 | -0.04 | 0.02  | -0.05 | -0.19 | 0.03  |
| 50 | 1 | -0.06 | 0.06  | 0.00  | -0.01 | 0.07  | 0.07  | -0.18 | 0.18  | 0.09  |
| 51 | 6 | -0.03 | 0.05  | -0.01 | -0.01 | 0.03  | -0.02 | 0.05  | 0.07  | -0.07 |
| 52 | 1 | -0.02 | 0.06  | 0.02  | 0.02  | 0.05  | 0.01  | 0.17  | 0.12  | 0.03  |
| 53 | 6 | 0.01  | -0.01 | 0.00  | 0.03  | -0.01 | -0.02 | 0.07  | -0.02 | -0.07 |
| 54 | 1 | 0.02  | -0.01 | -0.01 | 0.07  | -0.02 | -0.07 | 0.21  | -0.05 | -0.21 |
| 55 | 6 | 0.00  | 0.00  | 0.01  | -0.01 | 0.00  | 0.02  | -0.02 | 0.01  | 0.03  |
| 56 | 1 | -0.01 | 0.01  | 0.01  | -0.04 | 0.02  | 0.05  | -0.14 | 0.03  | 0.14  |
| 57 | 6 | 0.01  | 0.00  | 0.00  | 0.01  | 0.00  | 0.00  | -0.01 | 0.00  | 0.00  |
| 58 | 1 | 0.04  | -0.01 | -0.01 | 0.13  | -0.02 | -0.10 | 0.44  | -0.08 | -0.44 |
| 59 | 8 | -0.01 | 0.03  | 0.01  | -0.02 | -0.03 | 0.01  | -0.01 | -0.02 | -0.01 |
| 60 | 8 | 0.04  | 0.08  | -0.09 | -0.08 | -0.01 | -0.03 | 0.01  | -0.01 | 0.01  |
| 61 | 8 | 0.05  | -0.02 | 0.01  | -0.08 | 0.03  | 0.07  | 0.03  | -0.05 | 0.04  |
| 62 | 6 | 0.02  | 0.10  | -0.02 | -0.10 | 0.03  | -0.03 | 0.01  | -0.01 | 0.02  |
| 63 | 6 | 0.05  | 0.12  | 0.10  | 0.05  | 0.02  | 0.05  | -0.01 | -0.02 | -0.02 |
| 64 | 6 | 0.10  | 0.00  | -0.10 | 0.05  | 0.01  | -0.04 | -0.02 | 0.00  | 0.02  |

|    |   |       |       |       |       |       |       |       |       |       |
|----|---|-------|-------|-------|-------|-------|-------|-------|-------|-------|
| 65 | 8 | -0.02 | -0.14 | -0.02 | 0.03  | -0.03 | 0.00  | -0.01 | 0.01  | 0.02  |
| 66 | 1 | -0.06 | -0.06 | -0.19 | -0.07 | 0.03  | -0.13 | 0.03  | 0.00  | 0.05  |
| 67 | 6 | -0.01 | -0.06 | -0.03 | 0.01  | 0.01  | 0.00  | 0.00  | 0.00  | 0.00  |
| 68 | 1 | -0.16 | -0.34 | -0.07 | -0.06 | -0.10 | -0.03 | 0.03  | 0.06  | 0.01  |
| 69 | 1 | -0.07 | 0.08  | 0.14  | -0.02 | 0.08  | 0.07  | 0.01  | -0.03 | -0.03 |
| 70 | 1 | -0.09 | 0.05  | 0.10  | -0.03 | 0.04  | 0.04  | 0.02  | -0.01 | -0.02 |
| 71 | 6 | -0.11 | 0.03  | 0.15  | -0.03 | 0.01  | 0.04  | 0.02  | -0.01 | -0.03 |
| 72 | 1 | -0.01 | -0.08 | -0.08 | 0.02  | -0.03 | -0.08 | 0.00  | 0.01  | 0.01  |
| 73 | 1 | -0.24 | -0.05 | 0.19  | -0.14 | -0.01 | 0.09  | 0.06  | 0.00  | -0.05 |
| 74 | 1 | -0.26 | -0.02 | 0.22  | -0.09 | -0.01 | 0.03  | 0.05  | 0.00  | -0.03 |

|                |  |          |  |          |  |          |
|----------------|--|----------|--|----------|--|----------|
|                |  | 64       |  | 65       |  | 66       |
|                |  | A        |  | A        |  | A        |
| Frequencies -- |  | 696.6059 |  | 703.3477 |  | 722.1832 |
| Red. masses -- |  | 4.6657   |  | 3.6142   |  | 3.0487   |
| Frc consts --  |  | 1.3339   |  | 1.0534   |  | 0.9368   |
| IR Inten --    |  | 22.6411  |  | 4.4208   |  | 12.3489  |
| Raman Activ -- |  | 0.8407   |  | 0.9355   |  | 2.6117   |
| Depolar (P) -- |  | 0.7468   |  | 0.1529   |  | 0.5165   |
| Depolar (U) -- |  | 0.8551   |  | 0.2653   |  | 0.6811   |

| Atom | AN | X     | Y     | Z     | X     | Y     | Z     | X     | Y     | Z     |
|------|----|-------|-------|-------|-------|-------|-------|-------|-------|-------|
| 1    | 6  | 0.13  | 0.00  | -0.11 | 0.13  | 0.06  | -0.06 | -0.02 | 0.04  | 0.03  |
| 2    | 6  | 0.10  | 0.01  | 0.02  | 0.10  | -0.02 | -0.03 | 0.12  | -0.11 | 0.11  |
| 3    | 6  | 0.08  | -0.07 | -0.01 | 0.02  | 0.03  | 0.06  | -0.05 | 0.02  | -0.01 |
| 4    | 6  | 0.06  | 0.17  | 0.01  | -0.04 | -0.05 | 0.00  | -0.07 | -0.01 | 0.02  |
| 5    | 6  | 0.01  | -0.04 | 0.00  | 0.00  | 0.07  | -0.03 | -0.03 | -0.01 | 0.00  |
| 6    | 6  | -0.03 | 0.02  | 0.00  | 0.01  | -0.07 | -0.02 | 0.01  | 0.02  | 0.01  |
| 7    | 8  | 0.03  | 0.06  | -0.03 | 0.02  | 0.03  | -0.02 | -0.05 | -0.02 | -0.02 |
| 8    | 6  | 0.04  | 0.07  | -0.02 | -0.01 | 0.05  | 0.03  | -0.01 | -0.02 | 0.00  |
| 9    | 6  | -0.01 | -0.04 | 0.06  | -0.02 | -0.04 | 0.03  | 0.07  | -0.01 | 0.05  |
| 10   | 1  | -0.02 | -0.07 | 0.07  | -0.02 | -0.04 | 0.03  | 0.17  | -0.07 | -0.01 |
| 11   | 8  | -0.05 | -0.17 | -0.01 | 0.00  | -0.08 | -0.01 | -0.01 | 0.03  | 0.01  |
| 12   | 6  | 0.04  | 0.22  | 0.05  | -0.05 | -0.09 | 0.00  | 0.02  | -0.03 | 0.10  |
| 13   | 1  | 0.11  | 0.34  | -0.07 | -0.09 | -0.13 | 0.04  | -0.01 | -0.01 | 0.08  |
| 14   | 6  | 0.03  | -0.01 | -0.05 | -0.05 | 0.02  | 0.08  | -0.01 | 0.00  | 0.01  |
| 15   | 8  | 0.01  | 0.00  | 0.02  | 0.00  | 0.00  | -0.02 | 0.00  | 0.00  | 0.00  |
| 16   | 6  | 0.02  | 0.00  | 0.01  | -0.01 | 0.01  | -0.01 | -0.05 | 0.01  | -0.04 |
| 17   | 1  | 0.07  | -0.06 | 0.06  | -0.02 | -0.02 | -0.03 | -0.10 | 0.01  | -0.11 |
| 18   | 1  | 0.04  | -0.07 | 0.06  | 0.06  | -0.05 | 0.04  | 0.03  | -0.01 | -0.03 |
| 19   | 1  | -0.10 | -0.02 | -0.06 | -0.07 | -0.02 | -0.09 | -0.02 | 0.00  | -0.07 |
| 20   | 6  | 0.00  | 0.06  | -0.02 | 0.03  | 0.07  | -0.01 | -0.04 | 0.03  | -0.03 |
| 21   | 1  | 0.00  | 0.11  | 0.01  | 0.03  | 0.10  | 0.00  | -0.05 | 0.07  | -0.01 |
| 22   | 6  | -0.02 | 0.03  | -0.06 | 0.01  | 0.02  | -0.02 | -0.02 | 0.02  | -0.03 |
| 23   | 1  | 0.01  | -0.12 | 0.17  | 0.01  | -0.14 | 0.14  | -0.08 | -0.01 | -0.15 |
| 24   | 1  | -0.15 | 0.04  | -0.04 | -0.05 | -0.06 | 0.06  | 0.09  | -0.12 | 0.05  |
| 25   | 1  | -0.20 | 0.12  | -0.14 | -0.18 | 0.09  | -0.15 | -0.04 | 0.00  | -0.11 |
| 26   | 6  | 0.01  | 0.04  | 0.00  | -0.09 | -0.08 | 0.02  | 0.03  | 0.03  | 0.00  |
| 27   | 1  | -0.03 | -0.01 | 0.04  | 0.04  | -0.04 | -0.08 | 0.01  | 0.05  | 0.00  |
| 28   | 1  | 0.05  | 0.09  | 0.04  | -0.16 | -0.15 | -0.06 | 0.02  | 0.04  | 0.00  |
| 29   | 6  | 0.01  | 0.04  | -0.06 | 0.03  | 0.02  | -0.07 | 0.00  | 0.00  | 0.00  |
| 30   | 1  | 0.05  | 0.10  | -0.07 | 0.04  | 0.05  | -0.07 | 0.00  | 0.01  | 0.00  |
| 31   | 1  | -0.02 | 0.13  | 0.07  | 0.02  | 0.05  | 0.00  | 0.01  | -0.02 | 0.01  |
| 32   | 6  | -0.07 | -0.06 | 0.10  | -0.09 | -0.05 | 0.14  | 0.15  | -0.06 | 0.02  |

|    |   |       |       |       |       |       |       |       |       |       |
|----|---|-------|-------|-------|-------|-------|-------|-------|-------|-------|
| 33 | 1 | -0.15 | -0.10 | 0.03  | -0.14 | 0.02  | 0.11  | -0.09 | 0.16  | -0.14 |
| 34 | 6 | -0.08 | -0.03 | 0.06  | -0.04 | -0.06 | -0.02 | 0.00  | 0.05  | -0.02 |
| 35 | 1 | -0.15 | 0.03  | 0.01  | -0.07 | 0.06  | -0.12 | -0.42 | 0.34  | -0.27 |
| 36 | 6 | 0.00  | 0.02  | -0.04 | 0.00  | 0.00  | -0.03 | -0.01 | 0.01  | -0.02 |
| 37 | 1 | 0.01  | -0.08 | 0.13  | 0.02  | 0.00  | -0.02 | 0.05  | 0.03  | -0.02 |
| 38 | 1 | -0.07 | -0.04 | -0.24 | 0.05  | -0.01 | 0.02  | 0.07  | 0.01  | 0.08  |
| 39 | 1 | -0.02 | -0.09 | -0.01 | 0.01  | 0.02  | -0.10 | 0.00  | 0.05  | -0.15 |
| 40 | 6 | 0.01  | -0.05 | 0.02  | -0.03 | 0.11  | 0.04  | 0.00  | -0.02 | 0.00  |
| 41 | 1 | -0.05 | -0.09 | 0.04  | 0.03  | 0.23  | -0.05 | 0.01  | -0.02 | 0.00  |
| 42 | 6 | 0.00  | 0.01  | -0.01 | -0.01 | -0.02 | 0.03  | 0.00  | 0.00  | 0.02  |
| 43 | 1 | 0.03  | -0.01 | -0.03 | -0.01 | 0.08  | -0.02 | -0.02 | -0.03 | 0.06  |
| 44 | 1 | 0.04  | 0.01  | -0.08 | -0.07 | -0.01 | 0.22  | -0.01 | -0.01 | -0.02 |
| 45 | 1 | 0.00  | -0.05 | 0.05  | 0.00  | 0.10  | -0.04 | -0.01 | -0.02 | 0.01  |
| 46 | 6 | 0.01  | -0.06 | -0.07 | -0.01 | 0.06  | 0.12  | 0.01  | 0.00  | -0.03 |
| 47 | 1 | 0.08  | -0.04 | -0.16 | -0.09 | 0.05  | 0.22  | 0.04  | 0.00  | -0.06 |
| 48 | 6 | -0.01 | 0.01  | 0.00  | 0.05  | -0.04 | 0.01  | 0.00  | 0.00  | -0.01 |
| 49 | 1 | 0.07  | 0.05  | 0.07  | -0.07 | -0.16 | -0.09 | 0.01  | -0.02 | 0.01  |
| 50 | 1 | -0.01 | 0.01  | 0.00  | 0.05  | 0.01  | 0.06  | -0.02 | 0.01  | 0.00  |
| 51 | 6 | -0.07 | 0.02  | 0.01  | 0.12  | -0.03 | -0.05 | 0.01  | 0.00  | -0.01 |
| 52 | 1 | -0.10 | 0.02  | 0.00  | 0.17  | -0.03 | -0.02 | 0.02  | 0.01  | -0.01 |
| 53 | 6 | -0.01 | -0.01 | 0.02  | 0.02  | 0.01  | -0.04 | 0.00  | 0.00  | 0.00  |
| 54 | 1 | -0.04 | 0.00  | 0.06  | 0.07  | -0.01 | -0.11 | 0.01  | 0.00  | 0.00  |
| 55 | 6 | 0.01  | 0.00  | 0.00  | -0.02 | 0.00  | 0.00  | 0.00  | 0.00  | 0.00  |
| 56 | 1 | 0.05  | 0.00  | -0.04 | -0.09 | 0.00  | 0.08  | -0.02 | 0.01  | 0.02  |
| 57 | 6 | 0.02  | 0.00  | 0.00  | -0.03 | 0.00  | 0.02  | 0.00  | 0.00  | 0.00  |
| 58 | 1 | -0.13 | 0.03  | 0.16  | 0.26  | -0.05 | -0.30 | 0.05  | -0.01 | -0.05 |
| 59 | 8 | -0.10 | -0.09 | 0.02  | -0.03 | -0.02 | 0.01  | 0.01  | 0.01  | 0.00  |
| 60 | 8 | -0.01 | -0.06 | -0.03 | 0.00  | 0.02  | 0.01  | -0.03 | -0.05 | 0.02  |
| 61 | 8 | -0.03 | -0.02 | 0.06  | 0.00  | 0.05  | -0.07 | 0.02  | -0.02 | 0.00  |
| 62 | 6 | -0.13 | -0.01 | 0.01  | 0.05  | 0.01  | -0.01 | -0.13 | 0.01  | -0.09 |
| 63 | 6 | 0.02  | -0.02 | 0.00  | 0.00  | 0.01  | 0.00  | 0.05  | 0.02  | 0.04  |
| 64 | 6 | 0.01  | 0.00  | 0.00  | 0.00  | 0.00  | -0.01 | 0.07  | 0.00  | -0.04 |
| 65 | 8 | 0.03  | 0.00  | 0.05  | -0.01 | 0.00  | -0.03 | 0.06  | 0.01  | -0.07 |
| 66 | 1 | -0.03 | 0.05  | -0.04 | 0.01  | -0.02 | 0.00  | -0.13 | 0.07  | -0.20 |
| 67 | 6 | 0.01  | 0.03  | 0.01  | 0.00  | -0.01 | -0.01 | 0.02  | 0.03  | 0.00  |
| 68 | 1 | 0.01  | 0.05  | 0.00  | -0.01 | -0.03 | -0.01 | -0.09 | -0.11 | -0.04 |
| 69 | 1 | 0.01  | 0.05  | 0.01  | -0.01 | -0.01 | 0.01  | -0.02 | 0.16  | 0.10  |
| 70 | 1 | 0.00  | 0.01  | -0.01 | -0.01 | 0.00  | 0.01  | -0.05 | 0.04  | 0.03  |
| 71 | 6 | 0.03  | -0.02 | -0.04 | -0.02 | 0.01  | 0.02  | -0.04 | 0.01  | 0.07  |
| 72 | 1 | 0.03  | -0.01 | -0.06 | -0.01 | 0.00  | 0.02  | 0.00  | -0.02 | -0.07 |
| 73 | 1 | -0.01 | -0.02 | -0.02 | -0.01 | 0.00  | 0.02  | -0.18 | 0.00  | 0.13  |
| 74 | 1 | 0.03  | -0.02 | -0.05 | -0.03 | 0.01  | 0.03  | -0.11 | -0.01 | 0.05  |

|                | 67       | 68       | 69       |
|----------------|----------|----------|----------|
|                | A        | A        | A        |
| Frequencies -- | 731.9101 | 738.9121 | 751.3513 |
| Red. masses -- | 3.2317   | 1.4022   | 4.1687   |
| Frc consts --  | 1.0200   | 0.4511   | 1.3866   |
| IR Inten --    | 0.4609   | 11.6448  | 2.6045   |
| Raman Activ -- | 5.8845   | 0.2055   | 2.4905   |
| Depolar (P) -- | 0.0972   | 0.6713   | 0.2193   |
| Depolar (U) -- | 0.1771   | 0.8033   | 0.3597   |
| Atom AN        | X Y Z    | X Y Z    | X Y Z    |

|    |   |       |       |       |       |       |       |       |       |       |
|----|---|-------|-------|-------|-------|-------|-------|-------|-------|-------|
| 1  | 6 | -0.01 | -0.03 | -0.01 | 0.00  | 0.01  | 0.00  | 0.00  | -0.05 | -0.04 |
| 2  | 6 | 0.12  | -0.08 | 0.12  | 0.00  | 0.00  | -0.01 | -0.07 | 0.00  | 0.06  |
| 3  | 6 | 0.02  | -0.01 | 0.01  | -0.01 | 0.01  | 0.00  | 0.12  | -0.09 | 0.01  |
| 4  | 6 | 0.08  | 0.00  | -0.02 | -0.01 | 0.00  | 0.00  | 0.16  | -0.11 | -0.05 |
| 5  | 6 | 0.04  | 0.00  | 0.01  | 0.00  | -0.01 | 0.01  | 0.08  | 0.02  | -0.03 |
| 6  | 6 | -0.01 | -0.02 | -0.01 | 0.03  | -0.01 | 0.00  | -0.04 | -0.05 | -0.03 |
| 7  | 8 | -0.03 | 0.01  | -0.02 | 0.00  | 0.00  | 0.00  | -0.02 | -0.05 | 0.00  |
| 8  | 6 | 0.01  | -0.03 | -0.01 | 0.00  | 0.00  | 0.00  | 0.04  | -0.01 | -0.07 |
| 9  | 6 | -0.02 | 0.04  | 0.00  | 0.00  | -0.01 | 0.00  | -0.06 | 0.10  | 0.06  |
| 10 | 1 | -0.13 | 0.16  | 0.08  | 0.01  | -0.01 | 0.00  | -0.04 | 0.04  | 0.05  |
| 11 | 8 | -0.01 | 0.02  | 0.02  | 0.00  | -0.01 | 0.00  | -0.02 | -0.03 | 0.01  |
| 12 | 6 | -0.02 | 0.02  | -0.11 | 0.00  | -0.01 | 0.01  | -0.06 | 0.08  | 0.12  |
| 13 | 1 | -0.03 | 0.00  | -0.09 | -0.01 | -0.02 | 0.01  | -0.30 | 0.02  | 0.15  |
| 14 | 6 | 0.01  | 0.00  | 0.00  | -0.03 | 0.01  | 0.04  | 0.00  | 0.00  | 0.00  |
| 15 | 8 | 0.00  | 0.00  | 0.00  | 0.01  | 0.00  | -0.02 | 0.00  | 0.00  | 0.00  |
| 16 | 6 | -0.11 | 0.02  | -0.08 | 0.00  | 0.00  | 0.00  | 0.04  | -0.01 | 0.01  |
| 17 | 1 | -0.10 | 0.00  | -0.08 | 0.00  | 0.00  | 0.00  | 0.09  | 0.00  | 0.08  |
| 18 | 1 | -0.10 | 0.01  | -0.08 | 0.01  | 0.00  | 0.01  | -0.06 | 0.04  | -0.02 |
| 19 | 1 | -0.11 | 0.02  | -0.09 | 0.00  | 0.00  | 0.00  | 0.04  | 0.01  | 0.07  |
| 20 | 6 | 0.06  | -0.05 | 0.05  | 0.00  | 0.01  | 0.00  | -0.09 | 0.04  | -0.05 |
| 21 | 1 | 0.06  | -0.05 | 0.04  | 0.00  | 0.01  | 0.00  | -0.09 | 0.07  | -0.03 |
| 22 | 6 | -0.07 | 0.05  | -0.11 | 0.01  | 0.00  | 0.01  | -0.01 | -0.01 | -0.01 |
| 23 | 1 | -0.08 | 0.07  | -0.14 | 0.00  | -0.01 | 0.00  | 0.02  | -0.03 | 0.09  |
| 24 | 1 | -0.04 | 0.06  | -0.13 | 0.01  | -0.02 | 0.02  | -0.08 | 0.06  | -0.04 |
| 25 | 1 | -0.03 | 0.04  | -0.08 | 0.00  | 0.00  | -0.01 | -0.04 | 0.02  | 0.01  |
| 26 | 6 | -0.02 | -0.03 | 0.00  | 0.00  | -0.01 | 0.01  | -0.07 | -0.06 | -0.01 |
| 27 | 1 | 0.01  | -0.06 | 0.00  | 0.02  | 0.01  | -0.01 | -0.01 | -0.11 | -0.01 |
| 28 | 1 | -0.01 | -0.04 | 0.00  | -0.03 | -0.02 | -0.01 | -0.03 | -0.10 | 0.00  |
| 29 | 6 | -0.01 | -0.01 | 0.03  | 0.00  | 0.00  | -0.01 | 0.00  | -0.09 | 0.02  |
| 30 | 1 | 0.01  | 0.02  | 0.03  | 0.00  | 0.00  | -0.01 | -0.01 | -0.11 | 0.02  |
| 31 | 1 | 0.01  | -0.04 | 0.06  | 0.00  | 0.01  | 0.00  | -0.03 | -0.03 | 0.01  |
| 32 | 6 | 0.13  | -0.06 | 0.02  | -0.01 | 0.00  | 0.01  | 0.09  | 0.04  | -0.15 |
| 33 | 1 | -0.09 | 0.10  | -0.14 | 0.00  | 0.01  | 0.01  | 0.15  | -0.16 | -0.14 |
| 34 | 6 | -0.02 | 0.06  | 0.04  | 0.00  | -0.01 | -0.01 | -0.01 | 0.10  | 0.10  |
| 35 | 1 | -0.44 | 0.30  | -0.18 | 0.02  | -0.01 | -0.01 | 0.02  | -0.05 | 0.22  |
| 36 | 6 | 0.02  | -0.01 | 0.02  | 0.00  | 0.00  | -0.01 | 0.01  | -0.01 | -0.06 |
| 37 | 1 | -0.07 | -0.03 | 0.01  | 0.00  | 0.00  | -0.02 | -0.14 | 0.07  | -0.27 |
| 38 | 1 | -0.08 | -0.01 | -0.08 | 0.00  | 0.00  | 0.00  | -0.10 | 0.08  | -0.02 |
| 39 | 1 | -0.01 | -0.04 | 0.19  | 0.00  | 0.01  | -0.02 | -0.01 | 0.04  | 0.22  |
| 40 | 6 | 0.00  | 0.04  | 0.01  | 0.00  | 0.01  | 0.01  | 0.00  | 0.10  | -0.01 |
| 41 | 1 | 0.02  | 0.07  | -0.02 | 0.00  | 0.03  | -0.01 | -0.02 | 0.09  | 0.00  |
| 42 | 6 | 0.00  | 0.01  | -0.03 | 0.01  | 0.00  | 0.00  | -0.01 | -0.01 | -0.01 |
| 43 | 1 | 0.02  | 0.04  | -0.06 | -0.02 | 0.00  | 0.02  | 0.05  | 0.09  | -0.13 |
| 44 | 1 | 0.01  | 0.01  | 0.01  | -0.03 | 0.00  | 0.01  | 0.01  | 0.00  | 0.13  |
| 45 | 1 | 0.01  | 0.03  | -0.02 | 0.00  | 0.02  | -0.06 | 0.02  | 0.04  | 0.05  |
| 46 | 6 | -0.01 | 0.00  | 0.02  | -0.01 | 0.00  | -0.01 | -0.03 | 0.00  | 0.11  |
| 47 | 1 | -0.05 | 0.00  | 0.05  | -0.01 | 0.00  | 0.00  | -0.18 | 0.03  | 0.22  |
| 48 | 6 | -0.01 | 0.01  | 0.01  | -0.01 | 0.00  | -0.01 | 0.01  | -0.01 | 0.01  |
| 49 | 1 | -0.01 | 0.03  | 0.00  | -0.01 | -0.02 | 0.00  | -0.06 | -0.03 | -0.06 |
| 50 | 1 | 0.01  | -0.01 | -0.01 | -0.03 | 0.01  | 0.00  | 0.06  | 0.00  | 0.03  |
| 51 | 6 | -0.01 | 0.00  | 0.02  | 0.01  | 0.00  | 0.00  | 0.02  | 0.00  | -0.01 |
| 52 | 1 | -0.02 | 0.00  | 0.01  | 0.04  | 0.01  | 0.02  | 0.01  | 0.00  | -0.01 |

|    |   |       |       |       |       |       |       |       |       |       |
|----|---|-------|-------|-------|-------|-------|-------|-------|-------|-------|
| 53 | 6 | 0.00  | 0.00  | 0.00  | -0.02 | 0.01  | 0.02  | 0.00  | 0.00  | 0.00  |
| 54 | 1 | 0.02  | 0.00  | -0.03 | 0.37  | -0.07 | -0.38 | 0.03  | -0.01 | -0.04 |
| 55 | 6 | -0.01 | 0.00  | 0.01  | -0.10 | 0.02  | 0.09  | -0.01 | 0.00  | 0.01  |
| 56 | 1 | 0.06  | -0.01 | -0.06 | 0.47  | -0.10 | -0.47 | 0.04  | -0.01 | -0.04 |
| 57 | 6 | 0.01  | 0.00  | -0.01 | 0.07  | -0.01 | -0.07 | 0.00  | 0.00  | 0.00  |
| 58 | 1 | -0.09 | 0.01  | 0.08  | -0.33 | 0.06  | 0.32  | 0.00  | 0.00  | 0.00  |
| 59 | 8 | -0.01 | -0.01 | 0.01  | 0.00  | 0.00  | -0.01 | 0.00  | 0.01  | 0.02  |
| 60 | 8 | 0.01  | 0.06  | -0.02 | 0.00  | 0.00  | 0.00  | 0.03  | -0.03 | 0.01  |
| 61 | 8 | -0.02 | 0.02  | 0.00  | 0.01  | -0.01 | 0.00  | -0.04 | 0.08  | -0.02 |
| 62 | 6 | 0.13  | 0.00  | 0.08  | 0.00  | 0.00  | -0.01 | -0.11 | 0.01  | -0.04 |
| 63 | 6 | -0.05 | -0.01 | -0.04 | 0.00  | 0.00  | 0.00  | 0.03  | -0.01 | 0.02  |
| 64 | 6 | -0.06 | 0.00  | 0.04  | 0.00  | 0.00  | 0.00  | 0.02  | 0.00  | -0.01 |
| 65 | 8 | -0.06 | -0.02 | 0.06  | 0.00  | 0.00  | -0.01 | 0.04  | 0.01  | -0.02 |
| 66 | 1 | 0.13  | -0.07 | 0.19  | 0.00  | 0.00  | -0.01 | -0.11 | 0.06  | -0.12 |
| 67 | 6 | -0.02 | -0.03 | 0.00  | 0.00  | 0.00  | 0.00  | 0.01  | 0.02  | 0.01  |
| 68 | 1 | 0.07  | 0.08  | 0.04  | -0.01 | -0.01 | 0.00  | -0.03 | 0.00  | -0.02 |
| 69 | 1 | 0.02  | -0.15 | -0.09 | 0.00  | 0.01  | 0.01  | 0.00  | 0.09  | 0.04  |
| 70 | 1 | 0.04  | -0.04 | -0.03 | 0.00  | 0.00  | 0.00  | -0.02 | -0.01 | -0.01 |
| 71 | 6 | 0.03  | -0.01 | -0.06 | 0.00  | 0.00  | 0.01  | 0.00  | 0.00  | 0.01  |
| 72 | 1 | 0.00  | 0.02  | 0.07  | 0.00  | 0.00  | 0.00  | 0.00  | 0.00  | -0.05 |
| 73 | 1 | 0.16  | 0.00  | -0.12 | -0.01 | 0.00  | 0.01  | -0.08 | 0.00  | 0.04  |
| 74 | 1 | 0.09  | 0.01  | -0.03 | -0.01 | 0.00  | 0.01  | -0.01 | -0.01 | -0.03 |

|                |          |          |          |
|----------------|----------|----------|----------|
|                | 70       | 71       | 72       |
|                | A        | A        | A        |
| Frequencies -- | 765.4691 | 772.7524 | 785.5698 |
| Red. masses -- | 3.2031   | 4.1504   | 3.5510   |
| Frc consts --  | 1.1058   | 1.4602   | 1.2911   |
| IR Inten --    | 7.1326   | 40.1779  | 6.9214   |
| Raman Activ -- | 7.3980   | 4.4199   | 1.8794   |
| Depolar (P) -- | 0.1262   | 0.1782   | 0.2661   |
| Depolar (U) -- | 0.2241   | 0.3025   | 0.4203   |

| Atom | AN | X     | Y     | Z     | X     | Y     | Z     | X     | Y     | Z     |
|------|----|-------|-------|-------|-------|-------|-------|-------|-------|-------|
| 1    | 6  | 0.00  | 0.06  | 0.03  | 0.02  | -0.01 | -0.02 | -0.15 | -0.13 | 0.03  |
| 2    | 6  | -0.01 | -0.02 | -0.01 | -0.01 | 0.00  | 0.02  | 0.06  | 0.04  | -0.01 |
| 3    | 6  | -0.01 | 0.06  | 0.03  | 0.03  | -0.02 | -0.01 | -0.04 | -0.07 | 0.03  |
| 4    | 6  | 0.06  | -0.02 | -0.01 | 0.04  | 0.07  | 0.01  | 0.05  | -0.03 | -0.01 |
| 5    | 6  | 0.05  | -0.07 | 0.11  | 0.02  | 0.03  | -0.05 | 0.03  | 0.00  | 0.01  |
| 6    | 6  | 0.13  | -0.03 | 0.04  | -0.03 | 0.01  | -0.01 | -0.01 | -0.01 | 0.00  |
| 7    | 8  | -0.01 | -0.02 | -0.01 | 0.00  | -0.01 | 0.00  | 0.03  | 0.08  | 0.02  |
| 8    | 6  | 0.00  | 0.02  | 0.00  | 0.01  | 0.00  | -0.01 | -0.04 | 0.04  | 0.00  |
| 9    | 6  | 0.00  | 0.00  | 0.03  | 0.01  | 0.00  | 0.03  | -0.04 | -0.02 | -0.01 |
| 10   | 1  | 0.01  | -0.04 | 0.02  | 0.05  | -0.03 | 0.01  | -0.01 | 0.02  | -0.02 |
| 11   | 8  | -0.01 | -0.05 | 0.00  | 0.00  | 0.01  | 0.01  | 0.05  | -0.03 | -0.03 |
| 12   | 6  | -0.01 | -0.02 | 0.01  | 0.02  | 0.04  | 0.06  | 0.00  | 0.03  | 0.04  |
| 13   | 1  | -0.05 | -0.03 | 0.03  | 0.04  | 0.11  | -0.01 | -0.05 | 0.02  | 0.04  |
| 14   | 6  | 0.07  | 0.00  | 0.02  | -0.02 | 0.00  | -0.02 | 0.00  | 0.00  | 0.00  |
| 15   | 8  | -0.06 | 0.00  | -0.02 | 0.02  | 0.00  | 0.01  | 0.00  | 0.00  | 0.00  |
| 16   | 6  | 0.02  | 0.00  | 0.01  | 0.01  | 0.00  | 0.00  | 0.10  | -0.02 | 0.07  |
| 17   | 1  | 0.01  | -0.01 | 0.00  | 0.01  | 0.01  | 0.01  | 0.11  | -0.10 | 0.06  |
| 18   | 1  | 0.04  | -0.02 | 0.02  | 0.00  | 0.01  | -0.01 | 0.20  | -0.10 | 0.14  |
| 19   | 1  | 0.00  | -0.01 | -0.01 | 0.02  | 0.00  | 0.02  | -0.01 | -0.05 | -0.02 |
| 20   | 6  | -0.03 | 0.06  | -0.01 | -0.02 | 0.01  | -0.03 | -0.12 | -0.09 | 0.09  |

|    |   |       |       |       |       |       |       |       |       |       |
|----|---|-------|-------|-------|-------|-------|-------|-------|-------|-------|
| 21 | 1 | -0.03 | 0.08  | 0.00  | -0.04 | 0.03  | -0.01 | -0.15 | -0.14 | 0.09  |
| 22 | 6 | 0.02  | 0.00  | 0.03  | 0.00  | 0.00  | 0.00  | -0.05 | -0.02 | -0.01 |
| 23 | 1 | -0.02 | -0.05 | -0.02 | 0.02  | -0.03 | 0.06  | -0.01 | 0.20  | -0.17 |
| 24 | 1 | 0.07  | -0.12 | 0.11  | -0.04 | 0.02  | -0.01 | 0.01  | 0.17  | -0.19 |
| 25 | 1 | -0.03 | -0.01 | -0.06 | -0.04 | 0.02  | -0.01 | 0.24  | -0.11 | 0.24  |
| 26 | 6 | -0.04 | -0.08 | 0.03  | 0.01  | 0.02  | -0.01 | -0.03 | -0.01 | -0.03 |
| 27 | 1 | 0.01  | -0.02 | -0.04 | 0.00  | 0.00  | 0.01  | -0.09 | -0.05 | 0.03  |
| 28 | 1 | -0.10 | -0.12 | -0.02 | 0.02  | 0.03  | 0.01  | 0.07  | -0.01 | 0.02  |
| 29 | 6 | 0.01  | 0.00  | -0.02 | 0.00  | -0.03 | 0.01  | 0.01  | 0.20  | -0.10 |
| 30 | 1 | 0.01  | 0.01  | -0.02 | -0.02 | -0.05 | 0.02  | 0.09  | 0.36  | -0.12 |
| 31 | 1 | -0.01 | 0.03  | 0.01  | -0.01 | -0.01 | -0.02 | 0.06  | 0.14  | 0.03  |
| 32 | 6 | 0.01  | 0.00  | 0.00  | 0.01  | 0.01  | -0.03 | 0.00  | -0.08 | 0.03  |
| 33 | 1 | 0.00  | 0.03  | 0.01  | 0.04  | -0.06 | -0.02 | -0.18 | 0.10  | -0.09 |
| 34 | 6 | 0.01  | -0.01 | -0.03 | -0.01 | 0.03  | 0.03  | 0.00  | -0.08 | -0.06 |
| 35 | 1 | 0.02  | 0.02  | -0.06 | 0.01  | -0.02 | 0.07  | -0.24 | 0.02  | -0.15 |
| 36 | 6 | -0.02 | 0.01  | -0.09 | 0.00  | 0.02  | -0.03 | 0.00  | 0.00  | -0.03 |
| 37 | 1 | -0.11 | 0.01  | -0.15 | 0.02  | -0.02 | 0.04  | -0.06 | 0.02  | -0.10 |
| 38 | 1 | -0.09 | 0.03  | -0.13 | -0.02 | -0.01 | -0.10 | -0.04 | 0.03  | -0.02 |
| 39 | 1 | -0.04 | 0.00  | 0.07  | 0.00  | -0.02 | -0.03 | -0.01 | 0.01  | 0.08  |
| 40 | 6 | -0.02 | 0.03  | 0.04  | 0.01  | -0.03 | 0.00  | 0.00  | 0.06  | -0.08 |
| 41 | 1 | 0.04  | 0.14  | -0.05 | -0.03 | -0.07 | 0.03  | 0.06  | 0.06  | -0.05 |
| 42 | 6 | 0.07  | 0.05  | -0.13 | -0.01 | -0.01 | 0.03  | 0.00  | 0.00  | 0.00  |
| 43 | 1 | -0.05 | 0.03  | -0.01 | 0.04  | 0.00  | -0.01 | 0.01  | 0.01  | -0.02 |
| 44 | 1 | -0.05 | 0.04  | -0.10 | 0.02  | -0.01 | 0.03  | 0.01  | 0.00  | 0.01  |
| 45 | 1 | 0.04  | 0.14  | -0.34 | 0.00  | -0.03 | 0.11  | 0.00  | 0.00  | 0.01  |
| 46 | 6 | -0.03 | 0.03  | -0.07 | 0.01  | -0.05 | 0.00  | -0.01 | 0.00  | 0.01  |
| 47 | 1 | -0.04 | -0.02 | 0.01  | 0.01  | -0.01 | -0.05 | -0.06 | 0.00  | 0.06  |
| 48 | 6 | -0.10 | 0.08  | 0.01  | 0.03  | -0.02 | 0.00  | 0.00  | 0.00  | 0.00  |
| 49 | 1 | -0.04 | 0.25  | 0.02  | 0.05  | -0.05 | 0.03  | -0.01 | -0.02 | -0.01 |
| 50 | 1 | -0.11 | -0.07 | -0.16 | 0.04  | 0.03  | 0.06  | -0.01 | 0.01  | 0.00  |
| 51 | 6 | -0.01 | -0.01 | 0.17  | -0.03 | 0.02  | -0.04 | 0.01  | 0.00  | 0.00  |
| 52 | 1 | 0.02  | -0.03 | 0.17  | -0.04 | 0.02  | -0.04 | 0.01  | 0.01  | 0.01  |
| 53 | 6 | 0.01  | 0.05  | -0.02 | 0.00  | -0.02 | 0.01  | 0.00  | 0.00  | 0.00  |
| 54 | 1 | -0.26 | 0.09  | 0.20  | 0.05  | -0.02 | -0.03 | -0.01 | 0.00  | 0.00  |
| 55 | 6 | 0.02  | 0.00  | -0.07 | 0.00  | 0.00  | 0.02  | 0.00  | 0.00  | 0.00  |
| 56 | 1 | -0.21 | -0.01 | 0.20  | 0.04  | 0.01  | -0.04 | 0.00  | 0.00  | 0.00  |
| 57 | 6 | 0.02  | -0.03 | -0.04 | 0.00  | 0.01  | 0.01  | 0.00  | 0.00  | 0.00  |
| 58 | 1 | -0.29 | 0.03  | 0.19  | 0.07  | 0.00  | -0.03 | -0.02 | 0.00  | 0.02  |
| 59 | 8 | -0.02 | -0.02 | -0.02 | -0.02 | -0.02 | 0.00  | 0.09  | 0.04  | 0.05  |
| 60 | 8 | -0.03 | -0.02 | 0.01  | -0.14 | -0.09 | 0.04  | 0.00  | -0.02 | 0.02  |
| 61 | 8 | 0.01  | -0.04 | 0.00  | -0.03 | 0.02  | 0.03  | -0.01 | 0.01  | -0.01 |
| 62 | 6 | 0.06  | -0.03 | -0.01 | 0.30  | -0.16 | -0.01 | 0.01  | -0.03 | -0.01 |
| 63 | 6 | -0.01 | 0.01  | -0.01 | -0.04 | 0.06  | -0.05 | 0.00  | 0.00  | 0.00  |
| 64 | 6 | 0.01  | 0.00  | -0.02 | 0.04  | 0.02  | -0.10 | 0.01  | 0.00  | -0.02 |
| 65 | 8 | -0.01 | 0.02  | -0.03 | -0.05 | 0.08  | -0.10 | 0.00  | 0.02  | -0.02 |
| 66 | 1 | 0.06  | -0.03 | 0.03  | 0.40  | -0.20 | 0.22  | 0.02  | -0.01 | -0.01 |
| 67 | 6 | 0.00  | 0.00  | 0.00  | 0.01  | 0.03  | -0.03 | 0.01  | 0.01  | 0.00  |
| 68 | 1 | -0.01 | -0.05 | 0.00  | -0.02 | -0.23 | 0.02  | -0.01 | -0.03 | 0.00  |
| 69 | 1 | 0.00  | 0.00  | 0.02  | -0.01 | -0.08 | 0.07  | 0.00  | 0.02  | 0.03  |
| 70 | 1 | 0.00  | 0.04  | 0.04  | 0.02  | 0.26  | 0.21  | 0.00  | 0.04  | 0.03  |
| 71 | 6 | -0.03 | 0.01  | 0.03  | -0.13 | 0.04  | 0.14  | -0.02 | 0.00  | 0.02  |
| 72 | 1 | -0.02 | 0.00  | 0.04  | -0.10 | -0.01 | 0.22  | -0.02 | 0.00  | 0.02  |

|                |    |          |       |       |          |       |       |          |       |       |
|----------------|----|----------|-------|-------|----------|-------|-------|----------|-------|-------|
| 73             | 1  | 0.00     | 0.00  | 0.02  | 0.04     | -0.04 | 0.05  | -0.01    | 0.00  | 0.02  |
| 74             | 1  | -0.04    | 0.01  | 0.06  | -0.17    | 0.02  | 0.31  | -0.02    | 0.00  | 0.04  |
|                |    | 73       |       |       | 74       |       |       | 75       |       |       |
|                |    | A        |       |       | A        |       |       | A        |       |       |
| Frequencies -- |    | 796.6185 |       |       | 801.2001 |       |       | 813.7477 |       |       |
| Red. masses -- |    | 3.5645   |       |       | 1.7821   |       |       | 3.8559   |       |       |
| Frc consts --  |    | 1.3327   |       |       | 0.6740   |       |       | 1.5044   |       |       |
| IR Inten --    |    | 11.4022  |       |       | 32.6376  |       |       | 1.0138   |       |       |
| Raman Activ -- |    | 1.9945   |       |       | 0.9129   |       |       | 6.0149   |       |       |
| Depolar (P) -- |    | 0.4822   |       |       | 0.5553   |       |       | 0.6109   |       |       |
| Depolar (U) -- |    | 0.6507   |       |       | 0.7141   |       |       | 0.7584   |       |       |
| Atom           | AN | X        | Y     | Z     | X        | Y     | Z     | X        | Y     | Z     |
| 1              | 6  | -0.06    | 0.18  | 0.12  | 0.00     | 0.01  | 0.01  | -0.05    | -0.06 | -0.01 |
| 2              | 6  | -0.03    | -0.05 | -0.01 | 0.00     | 0.00  | 0.00  | 0.00     | 0.03  | -0.02 |
| 3              | 6  | -0.02    | 0.04  | 0.00  | 0.00     | 0.00  | 0.00  | 0.02     | 0.16  | -0.18 |
| 4              | 6  | 0.10     | -0.04 | -0.05 | -0.01    | 0.00  | 0.00  | 0.03     | -0.05 | -0.03 |
| 5              | 6  | 0.07     | 0.04  | -0.06 | 0.01     | 0.03  | -0.05 | 0.02     | 0.03  | -0.08 |
| 6              | 6  | -0.04    | 0.02  | 0.00  | 0.00     | 0.00  | -0.02 | 0.01     | -0.04 | 0.01  |
| 7              | 8  | -0.03    | -0.06 | -0.01 | 0.00     | 0.00  | 0.00  | 0.02     | 0.03  | 0.01  |
| 8              | 6  | -0.01    | 0.04  | -0.01 | 0.00     | 0.00  | 0.00  | 0.00     | 0.00  | 0.01  |
| 9              | 6  | 0.04     | 0.00  | 0.06  | 0.00     | 0.00  | 0.00  | -0.07    | 0.01  | -0.04 |
| 10             | 1  | -0.01    | -0.04 | 0.08  | 0.00     | 0.00  | 0.00  | -0.07    | 0.03  | -0.04 |
| 11             | 8  | -0.04    | -0.13 | 0.00  | 0.00     | -0.01 | 0.00  | 0.03     | 0.01  | 0.00  |
| 12             | 6  | 0.04     | -0.03 | -0.08 | 0.00     | -0.01 | -0.01 | -0.04    | -0.01 | 0.05  |
| 13             | 1  | -0.05    | -0.06 | -0.06 | -0.01    | -0.01 | 0.00  | -0.08    | -0.05 | 0.09  |
| 14             | 6  | -0.02    | 0.00  | -0.05 | -0.11    | 0.02  | 0.09  | -0.02    | 0.00  | -0.03 |
| 15             | 8  | 0.03     | 0.00  | 0.02  | -0.02    | 0.01  | 0.03  | 0.02     | 0.00  | 0.02  |
| 16             | 6  | 0.06     | 0.00  | 0.04  | 0.00     | 0.00  | 0.00  | -0.02    | 0.00  | -0.01 |
| 17             | 1  | 0.04     | -0.04 | 0.01  | 0.00     | 0.00  | 0.00  | 0.00     | -0.02 | 0.00  |
| 18             | 1  | 0.14     | -0.06 | 0.08  | 0.00     | 0.00  | 0.00  | -0.01    | -0.01 | 0.00  |
| 19             | 1  | 0.01     | -0.03 | -0.02 | 0.00     | 0.00  | 0.00  | -0.04    | 0.00  | -0.02 |
| 20             | 6  | -0.09    | 0.14  | 0.01  | 0.00     | 0.01  | 0.00  | 0.02     | -0.06 | 0.02  |
| 21             | 1  | -0.10    | 0.22  | 0.05  | 0.00     | 0.01  | 0.00  | 0.05     | -0.13 | -0.03 |
| 22             | 6  | 0.02     | 0.01  | 0.08  | 0.00     | 0.00  | 0.00  | 0.00     | -0.03 | 0.02  |
| 23             | 1  | -0.11    | -0.04 | -0.22 | -0.01    | 0.00  | -0.01 | 0.03     | 0.11  | -0.07 |
| 24             | 1  | 0.26     | -0.33 | 0.29  | 0.01     | -0.02 | 0.02  | 0.03     | 0.09  | -0.08 |
| 25             | 1  | -0.03    | -0.05 | -0.14 | 0.00     | 0.00  | -0.01 | 0.17     | -0.08 | 0.16  |
| 26             | 6  | 0.02     | 0.01  | 0.00  | 0.01     | 0.02  | -0.01 | 0.14     | -0.01 | 0.11  |
| 27             | 1  | 0.01     | 0.00  | 0.01  | 0.00     | 0.02  | 0.00  | 0.53     | 0.07  | -0.15 |
| 28             | 1  | 0.02     | 0.03  | 0.00  | 0.01     | 0.03  | 0.00  | -0.16    | -0.20 | -0.13 |
| 29             | 6  | -0.01    | 0.03  | -0.04 | 0.00     | 0.00  | 0.00  | 0.01     | 0.04  | -0.02 |
| 30             | 1  | 0.03     | 0.11  | -0.05 | 0.00     | 0.00  | 0.00  | 0.02     | 0.06  | -0.02 |
| 31             | 1  | -0.02    | 0.09  | 0.08  | 0.00     | 0.00  | 0.00  | 0.02     | 0.01  | 0.00  |
| 32             | 6  | 0.04     | -0.01 | -0.01 | 0.00     | 0.00  | 0.00  | 0.00     | -0.02 | 0.03  |
| 33             | 1  | 0.01     | 0.11  | -0.02 | 0.00     | 0.00  | 0.00  | -0.11    | 0.07  | -0.04 |
| 34             | 6  | 0.04     | -0.03 | -0.09 | 0.00     | 0.00  | 0.00  | 0.01     | -0.02 | 0.01  |
| 35             | 1  | 0.00     | 0.05  | -0.17 | 0.00     | 0.00  | -0.01 | -0.10    | 0.04  | -0.05 |
| 36             | 6  | 0.03     | -0.01 | 0.03  | 0.00     | 0.00  | 0.02  | 0.02     | -0.01 | 0.03  |
| 37             | 1  | -0.11    | 0.01  | -0.09 | 0.02     | 0.00  | 0.02  | -0.03    | 0.06  | -0.10 |
| 38             | 1  | -0.08    | 0.02  | -0.02 | 0.02     | -0.01 | 0.03  | 0.00     | 0.04  | 0.10  |
| 39             | 1  | 0.01     | -0.01 | 0.26  | 0.01     | 0.00  | -0.01 | 0.02     | 0.04  | 0.09  |
| 40             | 6  | 0.01     | -0.06 | 0.01  | 0.00     | -0.01 | 0.00  | 0.01     | 0.03  | 0.23  |



|    |   |       |       |       |       |       |       |       |       |       |
|----|---|-------|-------|-------|-------|-------|-------|-------|-------|-------|
| 41 | 1 | 0.01  | -0.07 | 0.01  | -0.01 | -0.02 | 0.01  | -0.08 | 0.20  | 0.01  |
| 42 | 6 | -0.01 | 0.00  | 0.02  | -0.01 | -0.02 | 0.05  | 0.02  | 0.00  | -0.04 |
| 43 | 1 | 0.04  | 0.00  | -0.03 | -0.02 | -0.01 | 0.05  | 0.01  | 0.08  | -0.07 |
| 44 | 1 | 0.04  | 0.00  | -0.02 | -0.03 | -0.02 | 0.08  | -0.02 | 0.01  | 0.11  |
| 45 | 1 | 0.00  | -0.05 | 0.11  | -0.01 | -0.01 | 0.04  | 0.03  | 0.09  | -0.10 |
| 46 | 6 | 0.00  | -0.07 | 0.01  | -0.01 | -0.04 | 0.01  | -0.01 | -0.07 | 0.01  |
| 47 | 1 | -0.07 | -0.01 | 0.00  | -0.04 | 0.00  | -0.01 | 0.00  | -0.02 | -0.06 |
| 48 | 6 | 0.02  | -0.03 | 0.00  | 0.03  | -0.03 | -0.02 | 0.00  | 0.00  | 0.02  |
| 49 | 1 | 0.06  | -0.01 | 0.05  | 0.02  | -0.13 | 0.01  | 0.04  | 0.09  | 0.03  |
| 50 | 1 | 0.06  | 0.02  | 0.06  | 0.02  | 0.06  | 0.08  | 0.11  | 0.01  | 0.05  |
| 51 | 6 | -0.08 | 0.03  | -0.05 | 0.01  | 0.03  | -0.06 | -0.08 | 0.02  | -0.02 |
| 52 | 1 | -0.13 | 0.03  | -0.07 | 0.09  | 0.04  | -0.01 | -0.11 | 0.02  | -0.04 |
| 53 | 6 | -0.01 | -0.04 | 0.01  | 0.03  | -0.02 | -0.03 | -0.01 | -0.03 | 0.01  |
| 54 | 1 | 0.08  | -0.04 | -0.03 | -0.16 | 0.02  | 0.17  | 0.04  | -0.03 | 0.01  |
| 55 | 6 | 0.00  | 0.00  | 0.03  | 0.05  | -0.01 | -0.04 | 0.02  | -0.01 | 0.01  |
| 56 | 1 | 0.09  | 0.02  | -0.08 | -0.35 | 0.08  | 0.35  | -0.03 | 0.04  | 0.03  |
| 57 | 6 | -0.02 | 0.03  | 0.03  | 0.11  | -0.01 | -0.11 | 0.00  | 0.02  | 0.01  |
| 58 | 1 | 0.18  | -0.01 | -0.11 | -0.52 | 0.10  | 0.54  | 0.05  | 0.01  | 0.00  |
| 59 | 8 | 0.00  | 0.00  | -0.02 | 0.00  | 0.00  | 0.00  | -0.13 | -0.06 | -0.10 |
| 60 | 8 | -0.02 | 0.03  | -0.04 | 0.00  | 0.00  | 0.00  | 0.03  | -0.02 | 0.03  |
| 61 | 8 | -0.04 | 0.04  | 0.03  | -0.01 | 0.02  | 0.01  | -0.02 | 0.03  | 0.02  |
| 62 | 6 | 0.02  | 0.03  | 0.03  | 0.00  | 0.00  | 0.00  | -0.02 | -0.01 | -0.02 |
| 63 | 6 | -0.01 | 0.00  | 0.00  | 0.00  | 0.00  | 0.00  | 0.00  | -0.01 | 0.00  |
| 64 | 6 | -0.02 | 0.00  | 0.02  | 0.00  | 0.00  | 0.00  | 0.01  | 0.00  | -0.01 |
| 65 | 8 | -0.02 | -0.02 | 0.03  | 0.00  | 0.00  | 0.00  | 0.01  | 0.01  | -0.02 |
| 66 | 1 | 0.02  | -0.02 | 0.05  | 0.00  | 0.00  | 0.00  | -0.05 | 0.03  | -0.06 |
| 67 | 6 | -0.01 | -0.02 | 0.00  | 0.00  | 0.00  | 0.00  | 0.01  | 0.01  | 0.00  |
| 68 | 1 | 0.02  | 0.03  | 0.01  | 0.00  | 0.00  | 0.00  | -0.02 | -0.01 | -0.01 |
| 69 | 1 | 0.00  | -0.06 | -0.04 | 0.00  | 0.00  | 0.00  | 0.00  | 0.06  | 0.03  |
| 70 | 1 | 0.01  | -0.03 | -0.02 | 0.00  | -0.01 | 0.00  | -0.01 | 0.00  | 0.00  |
| 71 | 6 | 0.02  | 0.00  | -0.02 | 0.00  | 0.00  | 0.00  | -0.01 | 0.00  | 0.01  |
| 72 | 1 | 0.01  | 0.00  | 0.00  | 0.00  | 0.00  | 0.00  | -0.01 | 0.01  | 0.00  |
| 73 | 1 | 0.04  | 0.00  | -0.04 | 0.00  | 0.00  | 0.00  | -0.03 | 0.01  | 0.02  |
| 74 | 1 | 0.03  | 0.00  | -0.02 | 0.00  | 0.00  | 0.00  | -0.01 | 0.00  | 0.00  |

|    |    |    |
|----|----|----|
| 76 | 77 | 78 |
| A  | A  | A  |

|                |          |          |          |
|----------------|----------|----------|----------|
| Frequencies -- | 834.8182 | 843.0488 | 851.8545 |
| Red. masses -- | 4.2054   | 2.2621   | 3.7215   |
| Frc consts --  | 1.7268   | 0.9473   | 1.5911   |
| IR Inten --    | 8.7574   | 17.4461  | 17.0668  |
| Raman Activ -- | 3.1907   | 2.5204   | 2.4895   |
| Depolar (P) -- | 0.7271   | 0.4820   | 0.4209   |
| Depolar (U) -- | 0.8420   | 0.6505   | 0.5924   |

| Atom | AN | X     | Y     | Z     | X     | Y     | Z     | X     | Y     | Z     |
|------|----|-------|-------|-------|-------|-------|-------|-------|-------|-------|
| 1    | 6  | -0.01 | 0.01  | 0.00  | 0.02  | -0.01 | 0.05  | -0.02 | -0.08 | -0.11 |
| 2    | 6  | -0.01 | 0.01  | -0.01 | 0.17  | -0.10 | 0.11  | 0.00  | 0.01  | 0.03  |
| 3    | 6  | 0.00  | 0.05  | -0.06 | -0.01 | 0.02  | -0.03 | 0.02  | 0.00  | -0.08 |
| 4    | 6  | 0.04  | 0.00  | 0.01  | -0.01 | 0.00  | 0.00  | -0.05 | 0.02  | -0.02 |
| 5    | 6  | -0.06 | -0.05 | 0.28  | -0.01 | 0.00  | 0.01  | -0.09 | -0.03 | 0.00  |
| 6    | 6  | -0.14 | 0.02  | -0.02 | 0.00  | -0.01 | 0.00  | -0.03 | -0.02 | -0.02 |
| 7    | 8  | 0.00  | 0.00  | 0.00  | -0.04 | 0.01  | -0.02 | 0.00  | 0.01  | 0.01  |
| 8    | 6  | 0.00  | 0.00  | 0.00  | -0.05 | 0.00  | -0.02 | -0.07 | -0.01 | -0.03 |

|    |   |       |       |       |       |       |       |       |       |       |
|----|---|-------|-------|-------|-------|-------|-------|-------|-------|-------|
| 9  | 6 | 0.01  | 0.00  | 0.00  | 0.01  | 0.00  | -0.01 | 0.17  | -0.05 | 0.15  |
| 10 | 1 | 0.01  | -0.02 | 0.00  | 0.02  | 0.02  | -0.01 | 0.26  | -0.10 | 0.09  |
| 11 | 8 | -0.01 | -0.01 | 0.00  | 0.02  | 0.00  | -0.02 | -0.02 | 0.04  | 0.00  |
| 12 | 6 | 0.02  | 0.03  | 0.00  | 0.01  | -0.01 | -0.01 | 0.02  | -0.01 | -0.05 |
| 13 | 1 | 0.04  | 0.04  | -0.01 | 0.01  | -0.01 | 0.00  | -0.07 | 0.04  | -0.12 |
| 14 | 6 | -0.09 | 0.01  | -0.03 | -0.01 | 0.00  | 0.00  | 0.04  | -0.01 | 0.03  |
| 15 | 8 | 0.04  | -0.01 | 0.05  | 0.00  | 0.00  | 0.00  | -0.03 | 0.01  | -0.03 |
| 16 | 6 | -0.01 | 0.00  | 0.00  | 0.07  | -0.03 | 0.05  | 0.08  | -0.03 | 0.08  |
| 17 | 1 | -0.01 | 0.00  | -0.01 | 0.08  | 0.01  | 0.08  | -0.02 | 0.01  | -0.07 |
| 18 | 1 | 0.01  | 0.00  | 0.00  | 0.01  | 0.01  | 0.02  | 0.22  | -0.02 | 0.08  |
| 19 | 1 | -0.01 | 0.00  | -0.01 | 0.11  | -0.01 | 0.11  | 0.20  | -0.03 | 0.05  |
| 20 | 6 | 0.00  | 0.00  | 0.00  | -0.03 | -0.03 | 0.03  | -0.15 | 0.05  | -0.06 |
| 21 | 1 | 0.01  | 0.01  | -0.01 | -0.08 | -0.08 | 0.06  | -0.25 | 0.26  | 0.10  |
| 22 | 6 | 0.01  | -0.01 | 0.02  | -0.05 | 0.06  | -0.07 | 0.05  | -0.07 | 0.04  |
| 23 | 1 | 0.00  | 0.01  | -0.02 | -0.11 | 0.03  | -0.19 | 0.12  | -0.06 | 0.21  |
| 24 | 1 | 0.03  | -0.02 | 0.02  | 0.06  | -0.07 | 0.00  | -0.10 | 0.10  | -0.06 |
| 25 | 1 | 0.03  | -0.02 | 0.02  | -0.05 | 0.02  | -0.13 | 0.03  | -0.01 | 0.13  |
| 26 | 6 | 0.02  | -0.03 | 0.00  | 0.02  | 0.00  | 0.02  | 0.06  | 0.02  | 0.03  |
| 27 | 1 | 0.08  | -0.13 | 0.02  | 0.08  | 0.02  | -0.03 | 0.19  | -0.02 | -0.03 |
| 28 | 1 | 0.04  | -0.06 | 0.00  | -0.03 | -0.04 | -0.02 | -0.01 | -0.03 | -0.03 |
| 29 | 6 | 0.00  | 0.00  | 0.01  | -0.02 | 0.03  | 0.00  | 0.00  | 0.01  | -0.05 |
| 30 | 1 | 0.00  | 0.00  | 0.01  | 0.02  | 0.08  | -0.01 | 0.02  | 0.09  | -0.03 |
| 31 | 1 | -0.01 | 0.01  | 0.01  | 0.02  | -0.04 | 0.02  | 0.03  | -0.06 | -0.01 |
| 32 | 6 | 0.00  | 0.00  | 0.01  | -0.07 | 0.06  | -0.06 | 0.06  | -0.02 | -0.05 |
| 33 | 1 | -0.04 | 0.04  | -0.02 | 0.46  | -0.35 | 0.32  | -0.02 | -0.03 | -0.12 |
| 34 | 6 | 0.01  | -0.01 | 0.00  | -0.09 | 0.06  | -0.07 | -0.01 | 0.04  | 0.06  |
| 35 | 1 | -0.03 | 0.03  | -0.03 | 0.38  | -0.30 | 0.25  | -0.15 | 0.02  | 0.07  |
| 36 | 6 | 0.00  | 0.00  | -0.05 | 0.00  | 0.00  | 0.01  | 0.01  | 0.00  | 0.06  |
| 37 | 1 | -0.12 | 0.02  | -0.13 | 0.00  | 0.01  | 0.00  | 0.06  | -0.02 | 0.12  |
| 38 | 1 | -0.11 | 0.04  | -0.09 | 0.01  | 0.00  | 0.03  | 0.04  | -0.02 | 0.07  |
| 39 | 1 | -0.03 | 0.00  | 0.17  | 0.00  | 0.01  | 0.00  | 0.01  | -0.01 | -0.01 |
| 40 | 6 | 0.03  | -0.02 | 0.05  | 0.00  | 0.01  | 0.03  | 0.00  | 0.05  | 0.06  |
| 41 | 1 | 0.02  | 0.00  | 0.02  | -0.01 | 0.04  | -0.01 | -0.08 | 0.06  | 0.02  |
| 42 | 6 | -0.03 | 0.03  | -0.05 | 0.00  | 0.00  | -0.01 | -0.01 | -0.01 | 0.00  |
| 43 | 1 | 0.10  | 0.03  | -0.18 | 0.00  | 0.01  | -0.01 | 0.03  | 0.03  | -0.05 |
| 44 | 1 | 0.11  | 0.03  | -0.14 | -0.01 | 0.00  | 0.01  | 0.01  | 0.00  | 0.06  |
| 45 | 1 | 0.00  | -0.09 | 0.18  | 0.00  | 0.02  | -0.03 | 0.01  | 0.01  | 0.04  |
| 46 | 6 | 0.13  | 0.26  | 0.05  | 0.01  | 0.01  | 0.00  | -0.01 | 0.04  | 0.01  |
| 47 | 1 | -0.07 | 0.11  | 0.43  | 0.02  | 0.00  | 0.00  | 0.12  | -0.01 | -0.06 |
| 48 | 6 | 0.05  | -0.03 | -0.07 | 0.00  | 0.00  | 0.00  | -0.01 | 0.03  | 0.01  |
| 49 | 1 | 0.05  | -0.27 | 0.02  | 0.00  | 0.00  | 0.00  | -0.10 | -0.03 | -0.08 |
| 50 | 1 | -0.30 | 0.05  | -0.04 | -0.01 | 0.00  | 0.00  | -0.02 | 0.01  | -0.01 |
| 51 | 6 | -0.06 | -0.05 | -0.12 | -0.01 | 0.00  | -0.01 | 0.09  | -0.03 | 0.02  |
| 52 | 1 | -0.15 | -0.01 | -0.12 | -0.01 | 0.00  | -0.01 | 0.12  | -0.01 | 0.05  |
| 53 | 6 | 0.00  | -0.06 | 0.01  | 0.00  | 0.00  | 0.00  | -0.01 | 0.04  | 0.01  |
| 54 | 1 | 0.10  | -0.05 | 0.02  | 0.02  | -0.01 | -0.01 | 0.04  | 0.02  | -0.09 |
| 55 | 6 | 0.03  | -0.01 | 0.01  | 0.00  | 0.00  | 0.00  | 0.00  | 0.01  | -0.02 |
| 56 | 1 | -0.10 | 0.09  | 0.09  | -0.02 | 0.01  | 0.02  | -0.05 | -0.04 | 0.07  |
| 57 | 6 | 0.03  | 0.05  | -0.02 | 0.00  | 0.00  | 0.00  | 0.00  | -0.03 | 0.00  |
| 58 | 1 | -0.06 | 0.07  | 0.10  | -0.01 | 0.00  | 0.01  | -0.04 | -0.02 | 0.02  |
| 59 | 8 | -0.03 | -0.03 | -0.01 | -0.01 | 0.00  | -0.01 | -0.03 | -0.01 | -0.02 |
| 60 | 8 | -0.01 | 0.00  | 0.00  | 0.00  | 0.00  | 0.00  | -0.06 | 0.04  | -0.10 |

|    |   |       |       |       |      |       |      |       |       |       |
|----|---|-------|-------|-------|------|-------|------|-------|-------|-------|
| 61 | 8 | 0.05  | -0.09 | -0.07 | 0.00 | -0.01 | 0.00 | 0.02  | -0.02 | 0.00  |
| 62 | 6 | 0.00  | -0.02 | 0.00  | 0.00 | 0.00  | 0.00 | 0.04  | 0.06  | 0.03  |
| 63 | 6 | 0.00  | 0.00  | 0.00  | 0.00 | 0.00  | 0.00 | 0.00  | 0.03  | 0.02  |
| 64 | 6 | 0.00  | 0.00  | -0.01 | 0.00 | 0.00  | 0.00 | -0.03 | 0.02  | 0.02  |
| 65 | 8 | 0.00  | 0.00  | 0.00  | 0.00 | 0.00  | 0.00 | -0.02 | -0.04 | 0.03  |
| 66 | 1 | 0.03  | -0.02 | 0.02  | 0.00 | 0.00  | 0.00 | 0.11  | -0.05 | 0.15  |
| 67 | 6 | 0.00  | 0.01  | 0.00  | 0.00 | 0.00  | 0.00 | -0.03 | -0.04 | -0.01 |
| 68 | 1 | 0.00  | -0.01 | 0.00  | 0.00 | 0.00  | 0.00 | 0.05  | 0.03  | 0.03  |
| 69 | 1 | 0.00  | 0.00  | 0.01  | 0.00 | 0.00  | 0.00 | 0.00  | -0.17 | -0.09 |
| 70 | 1 | 0.00  | 0.03  | 0.02  | 0.00 | 0.00  | 0.00 | 0.04  | -0.04 | -0.02 |
| 71 | 6 | -0.01 | 0.00  | 0.01  | 0.00 | 0.00  | 0.00 | 0.03  | 0.00  | -0.03 |
| 72 | 1 | 0.00  | 0.00  | 0.01  | 0.00 | 0.00  | 0.00 | 0.05  | -0.03 | -0.04 |
| 73 | 1 | 0.00  | 0.00  | 0.00  | 0.00 | 0.00  | 0.00 | 0.05  | -0.03 | -0.05 |
| 74 | 1 | 0.00  | 0.00  | 0.01  | 0.00 | 0.00  | 0.00 | 0.00  | -0.01 | 0.01  |

|                |  |          |  |          |  |          |
|----------------|--|----------|--|----------|--|----------|
|                |  | 79       |  | 80       |  | 81       |
|                |  | A        |  | A        |  | A        |
| Frequencies -- |  | 863.4892 |  | 866.5271 |  | 888.7652 |
| Red. masses -- |  | 3.1816   |  | 1.3552   |  | 2.1548   |
| Frc consts --  |  | 1.3977   |  | 0.5995   |  | 1.0028   |
| IR Inten --    |  | 11.2475  |  | 1.1709   |  | 7.1646   |
| Raman Activ -- |  | 6.7108   |  | 0.6223   |  | 2.8098   |
| Depolar (P) -- |  | 0.2837   |  | 0.6478   |  | 0.7352   |
| Depolar (U) -- |  | 0.4420   |  | 0.7862   |  | 0.8474   |

|      |    |       |       |       |       |       |       |       |       |       |
|------|----|-------|-------|-------|-------|-------|-------|-------|-------|-------|
| Atom | AN | X     | Y     | Z     | X     | Y     | Z     | X     | Y     | Z     |
| 1    | 6  | -0.02 | 0.05  | 0.07  | 0.00  | 0.00  | 0.00  | 0.01  | 0.02  | 0.03  |
| 2    | 6  | -0.02 | 0.00  | -0.01 | 0.00  | 0.00  | 0.00  | -0.02 | 0.01  | -0.01 |
| 3    | 6  | 0.04  | 0.03  | -0.08 | 0.00  | -0.01 | 0.02  | 0.04  | -0.01 | -0.01 |
| 4    | 6  | 0.04  | -0.03 | -0.03 | 0.00  | 0.00  | 0.00  | -0.02 | -0.05 | 0.00  |
| 5    | 6  | -0.06 | -0.06 | -0.02 | 0.01  | 0.00  | 0.00  | -0.07 | -0.09 | 0.01  |
| 6    | 6  | -0.12 | 0.01  | -0.07 | 0.01  | 0.00  | 0.01  | 0.05  | -0.02 | -0.02 |
| 7    | 8  | 0.00  | -0.01 | 0.00  | 0.00  | 0.00  | 0.00  | 0.00  | -0.01 | 0.00  |
| 8    | 6  | 0.01  | 0.00  | 0.01  | 0.00  | 0.00  | 0.00  | -0.01 | -0.01 | 0.01  |
| 9    | 6  | -0.03 | 0.03  | -0.06 | 0.00  | 0.00  | 0.00  | 0.02  | 0.02  | -0.03 |
| 10   | 1  | -0.08 | 0.04  | -0.03 | 0.00  | 0.00  | 0.00  | 0.03  | 0.03  | -0.03 |
| 11   | 8  | 0.00  | -0.05 | -0.01 | 0.00  | 0.00  | 0.00  | 0.00  | -0.04 | -0.02 |
| 12   | 6  | 0.04  | 0.06  | 0.00  | 0.00  | 0.00  | 0.00  | 0.04  | 0.06  | 0.00  |
| 13   | 1  | 0.08  | 0.05  | 0.01  | 0.00  | 0.00  | 0.00  | 0.08  | 0.08  | -0.01 |
| 14   | 6  | 0.10  | -0.02 | 0.08  | 0.02  | 0.00  | -0.03 | -0.02 | 0.04  | -0.01 |
| 15   | 8  | -0.07 | 0.02  | -0.08 | 0.01  | 0.00  | 0.00  | 0.06  | -0.06 | 0.07  |
| 16   | 6  | -0.02 | 0.01  | -0.02 | 0.00  | 0.00  | 0.00  | 0.00  | 0.00  | 0.00  |
| 17   | 1  | 0.00  | -0.01 | 0.01  | 0.00  | 0.00  | 0.00  | -0.02 | 0.00  | -0.02 |
| 18   | 1  | -0.04 | 0.00  | -0.01 | 0.00  | 0.00  | 0.00  | 0.02  | 0.00  | 0.00  |
| 19   | 1  | -0.05 | 0.01  | -0.01 | 0.00  | 0.00  | 0.00  | 0.01  | 0.00  | 0.00  |
| 20   | 6  | 0.04  | -0.01 | 0.03  | 0.00  | 0.00  | 0.00  | 0.01  | -0.01 | 0.01  |
| 21   | 1  | 0.07  | -0.08 | -0.03 | 0.00  | 0.00  | 0.00  | 0.01  | -0.04 | 0.00  |
| 22   | 6  | -0.02 | 0.02  | 0.01  | 0.00  | 0.00  | 0.00  | -0.01 | 0.02  | -0.01 |
| 23   | 1  | -0.08 | 0.06  | -0.19 | 0.00  | -0.01 | 0.01  | -0.03 | 0.00  | -0.05 |
| 24   | 1  | 0.12  | -0.09 | 0.06  | -0.01 | 0.00  | 0.00  | 0.02  | -0.03 | 0.02  |
| 25   | 1  | 0.04  | -0.04 | -0.04 | -0.01 | 0.01  | -0.01 | -0.02 | 0.01  | -0.04 |
| 26   | 6  | 0.02  | 0.05  | -0.06 | -0.01 | -0.01 | 0.01  | -0.01 | 0.03  | -0.02 |
| 27   | 1  | -0.01 | -0.18 | 0.08  | 0.00  | 0.02  | -0.01 | -0.03 | 0.00  | 0.02  |
| 28   | 1  | 0.11  | 0.21  | 0.06  | -0.02 | -0.03 | 0.00  | 0.00  | 0.11  | 0.02  |

|    |   |       |       |       |       |       |       |       |       |       |
|----|---|-------|-------|-------|-------|-------|-------|-------|-------|-------|
| 29 | 6 | -0.02 | 0.02  | 0.03  | 0.00  | 0.00  | 0.00  | -0.03 | 0.03  | 0.04  |
| 30 | 1 | 0.00  | 0.02  | 0.02  | 0.00  | -0.01 | 0.00  | -0.01 | 0.05  | 0.02  |
| 31 | 1 | -0.03 | 0.05  | 0.05  | 0.00  | 0.00  | 0.00  | -0.02 | 0.02  | 0.06  |
| 32 | 6 | -0.01 | 0.00  | 0.01  | 0.00  | 0.00  | 0.00  | 0.01  | 0.00  | 0.00  |
| 33 | 1 | 0.00  | 0.04  | 0.02  | -0.01 | 0.00  | 0.00  | -0.02 | 0.03  | -0.02 |
| 34 | 6 | 0.01  | -0.02 | -0.03 | 0.00  | 0.00  | 0.00  | 0.01  | -0.01 | 0.00  |
| 35 | 1 | 0.03  | 0.00  | -0.05 | 0.00  | 0.00  | 0.00  | -0.03 | 0.01  | -0.02 |
| 36 | 6 | 0.02  | -0.02 | 0.02  | 0.00  | 0.00  | 0.00  | -0.01 | -0.02 | 0.00  |
| 37 | 1 | -0.05 | 0.04  | -0.10 | 0.01  | -0.01 | 0.01  | 0.01  | 0.04  | -0.08 |
| 38 | 1 | -0.02 | 0.03  | 0.08  | 0.00  | 0.00  | -0.01 | 0.05  | 0.01  | 0.13  |
| 39 | 1 | 0.01  | 0.03  | 0.13  | 0.00  | 0.00  | -0.02 | 0.00  | 0.05  | -0.03 |
| 40 | 6 | 0.02  | -0.01 | 0.07  | 0.00  | 0.00  | -0.02 | -0.01 | 0.01  | 0.02  |
| 41 | 1 | -0.04 | -0.04 | 0.07  | 0.00  | -0.01 | -0.01 | -0.05 | -0.01 | 0.03  |
| 42 | 6 | -0.07 | -0.01 | 0.05  | 0.01  | 0.01  | -0.01 | 0.02  | -0.03 | 0.03  |
| 43 | 1 | 0.12  | -0.01 | -0.13 | -0.01 | 0.00  | 0.01  | -0.09 | -0.03 | 0.14  |
| 44 | 1 | 0.11  | -0.01 | -0.03 | -0.01 | 0.00  | -0.02 | -0.10 | -0.03 | 0.09  |
| 45 | 1 | -0.02 | -0.17 | 0.39  | 0.00  | 0.01  | -0.04 | -0.01 | 0.06  | -0.16 |
| 46 | 6 | -0.04 | 0.01  | 0.02  | 0.00  | -0.01 | -0.01 | -0.01 | 0.02  | 0.05  |
| 47 | 1 | 0.05  | -0.02 | -0.03 | 0.01  | 0.00  | -0.02 | 0.16  | -0.01 | -0.06 |
| 48 | 6 | -0.03 | 0.04  | -0.03 | 0.00  | 0.00  | 0.01  | -0.03 | 0.02  | 0.08  |
| 49 | 1 | -0.19 | -0.18 | -0.13 | 0.01  | 0.06  | 0.01  | -0.13 | 0.24  | -0.12 |
| 50 | 1 | -0.10 | 0.07  | 0.01  | 0.03  | -0.03 | -0.01 | 0.20  | -0.12 | -0.05 |
| 51 | 6 | 0.19  | -0.03 | 0.06  | -0.02 | 0.00  | 0.00  | 0.00  | -0.02 | -0.03 |
| 52 | 1 | 0.28  | 0.04  | 0.16  | -0.05 | -0.01 | -0.03 | 0.02  | -0.12 | -0.11 |
| 53 | 6 | 0.00  | 0.11  | 0.03  | -0.10 | 0.01  | 0.10  | -0.03 | 0.00  | -0.04 |
| 54 | 1 | 0.06  | 0.05  | -0.19 | 0.58  | -0.13 | -0.58 | 0.03  | 0.03  | 0.04  |
| 55 | 6 | 0.00  | 0.02  | -0.04 | 0.06  | -0.02 | -0.06 | -0.05 | -0.04 | -0.04 |
| 56 | 1 | -0.05 | -0.13 | 0.13  | -0.36 | 0.08  | 0.36  | -0.08 | 0.09  | -0.10 |
| 57 | 6 | -0.01 | -0.09 | 0.00  | 0.00  | 0.01  | 0.00  | 0.02  | 0.05  | 0.00  |
| 58 | 1 | -0.05 | -0.09 | 0.02  | -0.03 | 0.01  | 0.03  | -0.07 | 0.07  | -0.06 |
| 59 | 8 | -0.03 | -0.04 | 0.00  | 0.01  | 0.01  | 0.00  | 0.00  | 0.00  | -0.01 |
| 60 | 8 | 0.01  | -0.02 | 0.03  | 0.00  | 0.00  | 0.00  | 0.01  | 0.02  | -0.01 |
| 61 | 8 | 0.01  | 0.00  | 0.01  | 0.00  | 0.00  | 0.00  | 0.02  | 0.05  | -0.06 |
| 62 | 6 | -0.01 | -0.04 | 0.00  | 0.00  | 0.00  | 0.00  | -0.06 | 0.00  | -0.01 |
| 63 | 6 | 0.00  | -0.02 | -0.01 | 0.00  | 0.00  | 0.00  | 0.04  | -0.03 | 0.02  |
| 64 | 6 | 0.01  | 0.00  | -0.02 | 0.00  | 0.00  | 0.00  | -0.03 | 0.01  | -0.04 |
| 65 | 8 | 0.01  | 0.02  | 0.00  | 0.00  | 0.00  | 0.00  | 0.01  | -0.01 | 0.00  |
| 66 | 1 | 0.06  | -0.03 | 0.02  | -0.01 | 0.00  | -0.01 | 0.43  | -0.21 | 0.34  |
| 67 | 6 | 0.01  | 0.03  | 0.00  | 0.00  | 0.00  | 0.00  | -0.03 | 0.03  | -0.03 |
| 68 | 1 | 0.00  | -0.03 | 0.01  | 0.00  | 0.00  | 0.00  | 0.08  | -0.04 | 0.08  |
| 69 | 1 | 0.00  | 0.02  | 0.03  | 0.00  | 0.01  | 0.00  | 0.00  | -0.24 | -0.04 |
| 70 | 1 | 0.00  | 0.07  | 0.05  | 0.00  | 0.00  | 0.00  | 0.09  | 0.21  | 0.15  |
| 71 | 6 | -0.02 | 0.00  | 0.02  | 0.00  | 0.00  | 0.00  | -0.01 | -0.01 | 0.01  |
| 72 | 1 | -0.03 | 0.01  | 0.04  | 0.00  | 0.00  | 0.00  | -0.02 | 0.00  | 0.04  |
| 73 | 1 | 0.00  | 0.01  | 0.01  | 0.00  | 0.00  | 0.00  | 0.02  | 0.00  | 0.00  |
| 74 | 1 | 0.00  | 0.00  | 0.01  | 0.00  | 0.00  | 0.00  | 0.01  | 0.00  | 0.02  |

|                |          |          |          |
|----------------|----------|----------|----------|
|                | 82       | 83       | 84       |
|                | A        | A        | A        |
| Frequencies -- | 894.4122 | 895.3043 | 900.2979 |
| Red. masses -- | 2.1681   | 3.7773   | 2.6769   |
| Frc consts --  | 1.0219   | 1.7839   | 1.2784   |
| IR Inten --    | 6.7651   | 20.5857  | 2.9159   |

|    |      |       |       |                |        |       |       |        |       |       |        |
|----|------|-------|-------|----------------|--------|-------|-------|--------|-------|-------|--------|
|    |      |       |       | Raman Activ -- | 6.1001 |       |       | 0.4295 |       |       | 1.6755 |
|    |      |       |       | Depolar (P) -- | 0.7427 |       |       | 0.7498 |       |       | 0.7074 |
|    |      |       |       | Depolar (U) -- | 0.8524 |       |       | 0.8570 |       |       | 0.8286 |
|    | Atom | AN    | X     | Y              | Z      | X     | Y     | Z      | X     | Y     | Z      |
| 1  | 6    | -0.04 | -0.01 | -0.05          | 0.09   | 0.02  | 0.08  | -0.03  | 0.00  | -0.02 |        |
| 2  | 6    | 0.05  | -0.01 | 0.00           | -0.09  | 0.03  | -0.01 | 0.02   | -0.01 | 0.00  |        |
| 3  | 6    | -0.10 | 0.01  | -0.04          | 0.15   | -0.05 | 0.11  | -0.03  | 0.02  | -0.05 |        |
| 4  | 6    | -0.01 | -0.02 | -0.01          | -0.03  | -0.02 | 0.03  | 0.01   | 0.00  | 0.00  |        |
| 5  | 6    | 0.04  | 0.04  | 0.00           | -0.02  | 0.00  | 0.00  | -0.05  | -0.10 | 0.03  |        |
| 6  | 6    | 0.00  | 0.00  | 0.02           | 0.00   | 0.00  | 0.03  | 0.06   | -0.02 | -0.04 |        |
| 7  | 8    | 0.00  | 0.02  | 0.00           | 0.01   | -0.03 | 0.00  | 0.00   | 0.01  | 0.00  |        |
| 8  | 6    | 0.05  | 0.01  | 0.00           | -0.06  | -0.02 | 0.00  | 0.01   | 0.00  | 0.00  |        |
| 9  | 6    | 0.00  | 0.00  | 0.01           | 0.00   | 0.00  | -0.03 | 0.02   | 0.01  | 0.00  |        |
| 10 | 1    | 0.00  | -0.04 | 0.00           | 0.03   | 0.06  | -0.03 | 0.01   | -0.01 | 0.01  |        |
| 11 | 8    | -0.02 | 0.01  | 0.01           | 0.03   | -0.02 | -0.03 | -0.01  | -0.01 | 0.00  |        |
| 12 | 6    | 0.00  | 0.01  | 0.02           | 0.00   | -0.01 | 0.00  | 0.02   | 0.04  | -0.02 |        |
| 13 | 1    | -0.03 | -0.01 | 0.03           | 0.04   | 0.00  | 0.00  | 0.05   | 0.07  | -0.04 |        |
| 14 | 6    | -0.01 | -0.04 | -0.01          | -0.03  | -0.07 | -0.01 | -0.05  | -0.05 | -0.02 |        |
| 15 | 8    | -0.05 | 0.07  | -0.06          | -0.09  | 0.12  | -0.11 | -0.06  | 0.10  | -0.08 |        |
| 16 | 6    | -0.02 | 0.01  | -0.03          | 0.03   | -0.01 | 0.05  | -0.01  | 0.00  | -0.01 |        |
| 17 | 1    | 0.03  | 0.00  | 0.05           | -0.05  | 0.00  | -0.07 | 0.00   | 0.00  | 0.01  |        |
| 18 | 1    | -0.10 | 0.01  | -0.04          | 0.14   | -0.02 | 0.05  | -0.03  | 0.01  | -0.01 |        |
| 19 | 1    | -0.08 | 0.02  | -0.01          | 0.10   | -0.02 | 0.02  | -0.02  | 0.01  | 0.00  |        |
| 20 | 6    | 0.02  | 0.02  | -0.03          | -0.02  | -0.05 | 0.05  | 0.00   | 0.02  | -0.01 |        |
| 21 | 1    | 0.08  | 0.06  | -0.06          | -0.10  | -0.14 | 0.08  | 0.03   | 0.05  | -0.02 |        |
| 22 | 6    | 0.03  | -0.04 | 0.04           | -0.04  | 0.07  | -0.09 | 0.01   | -0.02 | 0.03  |        |
| 23 | 1    | 0.04  | 0.02  | 0.00           | -0.06  | -0.05 | 0.02  | 0.01   | 0.02  | -0.03 |        |
| 24 | 1    | 0.04  | 0.01  | 0.00           | -0.09  | 0.00  | -0.01 | 0.04   | -0.02 | 0.02  |        |
| 25 | 1    | 0.10  | -0.06 | 0.10           | -0.18  | 0.13  | -0.17 | 0.06   | -0.04 | 0.05  |        |
| 26 | 6    | 0.01  | -0.02 | -0.01          | -0.01  | 0.00  | 0.08  | 0.00   | 0.04  | -0.06 |        |
| 27 | 1    | -0.01 | -0.01 | 0.00           | 0.12   | 0.17  | -0.09 | -0.11  | -0.09 | 0.07  |        |
| 28 | 1    | 0.06  | -0.06 | 0.00           | -0.19  | -0.15 | -0.07 | 0.09   | 0.20  | 0.06  |        |
| 29 | 6    | 0.02  | -0.04 | 0.01           | -0.05  | 0.06  | 0.01  | 0.00   | -0.01 | 0.02  |        |
| 30 | 1    | -0.03 | -0.12 | 0.02           | 0.04   | 0.19  | -0.02 | -0.02  | -0.04 | 0.02  |        |
| 31 | 1    | -0.02 | 0.04  | -0.05          | 0.03   | -0.06 | 0.10  | -0.02  | 0.04  | -0.01 |        |
| 32 | 6    | -0.03 | 0.01  | 0.03           | 0.05   | -0.01 | -0.04 | -0.01  | 0.00  | 0.01  |        |
| 33 | 1    | 0.03  | -0.07 | 0.07           | -0.06  | 0.12  | -0.11 | 0.01   | -0.03 | 0.03  |        |
| 34 | 6    | -0.02 | 0.00  | -0.01          | 0.04   | -0.01 | 0.02  | -0.01  | 0.00  | -0.01 |        |
| 35 | 1    | 0.08  | -0.02 | 0.01           | -0.13  | 0.04  | -0.03 | 0.03   | -0.01 | 0.00  |        |
| 36 | 6    | 0.00  | -0.01 | 0.01           | -0.03  | 0.00  | -0.02 | 0.01   | -0.01 | 0.00  |        |
| 37 | 1    | -0.03 | 0.03  | -0.07          | 0.08   | -0.01 | 0.06  | -0.04  | 0.01  | -0.06 |        |
| 38 | 1    | 0.01  | 0.02  | 0.07           | 0.06   | -0.02 | 0.03  | -0.02  | 0.01  | 0.01  |        |
| 39 | 1    | 0.01  | 0.03  | 0.03           | -0.01  | 0.00  | -0.19 | 0.00   | 0.01  | 0.08  |        |
| 40 | 6    | 0.00  | 0.04  | -0.04          | 0.00   | -0.06 | 0.01  | -0.01  | 0.03  | 0.01  |        |
| 41 | 1    | 0.08  | 0.10  | -0.07          | -0.12  | -0.17 | 0.08  | 0.01   | 0.05  | 0.00  |        |
| 42 | 6    | 0.00  | 0.01  | -0.01          | 0.01   | 0.01  | -0.04 | 0.02   | -0.03 | 0.05  |        |
| 43 | 1    | 0.01  | 0.01  | -0.02          | 0.00   | 0.04  | -0.04 | -0.11  | -0.05 | 0.18  |        |
| 44 | 1    | 0.02  | 0.01  | -0.02          | -0.01  | 0.01  | 0.01  | -0.11  | -0.04 | 0.08  |        |
| 45 | 1    | 0.01  | 0.00  | -0.01          | 0.01   | 0.04  | -0.06 | -0.02  | 0.04  | -0.17 |        |
| 46 | 6    | 0.00  | -0.02 | -0.02          | 0.02   | 0.02  | 0.01  | -0.01  | 0.02  | 0.05  |        |
| 47 | 1    | -0.10 | 0.01  | 0.05           | 0.01   | 0.02  | 0.03  | 0.16   | 0.00  | -0.07 |        |
| 48 | 6    | 0.02  | -0.01 | -0.02          | 0.01   | -0.02 | -0.01 | -0.03  | 0.01  | 0.10  |        |

|    |   |       |       |       |       |       |       |       |       |       |
|----|---|-------|-------|-------|-------|-------|-------|-------|-------|-------|
| 49 | 1 | 0.08  | -0.06 | 0.07  | 0.01  | -0.04 | 0.00  | -0.10 | 0.30  | -0.11 |
| 50 | 1 | -0.05 | 0.04  | 0.02  | -0.01 | -0.01 | 0.00  | 0.26  | -0.15 | -0.04 |
| 51 | 6 | -0.03 | 0.01  | 0.01  | -0.02 | 0.00  | -0.02 | -0.03 | -0.01 | -0.05 |
| 52 | 1 | -0.04 | 0.04  | 0.03  | -0.04 | 0.01  | -0.01 | -0.01 | -0.15 | -0.15 |
| 53 | 6 | 0.03  | -0.04 | 0.04  | 0.06  | -0.08 | 0.07  | 0.04  | -0.10 | 0.06  |
| 54 | 1 | -0.02 | -0.07 | -0.04 | -0.09 | -0.12 | 0.00  | -0.04 | -0.13 | -0.02 |
| 55 | 6 | 0.06  | 0.04  | 0.05  | 0.10  | 0.07  | 0.10  | 0.09  | 0.05  | 0.08  |
| 56 | 1 | 0.08  | -0.06 | 0.10  | 0.16  | -0.12 | 0.16  | 0.12  | -0.05 | 0.13  |
| 57 | 6 | -0.02 | -0.03 | -0.01 | -0.03 | -0.06 | -0.02 | -0.02 | -0.02 | -0.02 |
| 58 | 1 | 0.08  | -0.06 | 0.08  | 0.14  | -0.10 | 0.16  | 0.12  | -0.05 | 0.13  |
| 59 | 8 | 0.02  | -0.02 | 0.07  | -0.03 | 0.07  | -0.11 | 0.01  | -0.03 | 0.04  |
| 60 | 8 | 0.02  | 0.02  | -0.01 | 0.01  | 0.01  | 0.00  | -0.02 | -0.01 | 0.00  |
| 61 | 8 | -0.01 | -0.01 | 0.02  | 0.01  | 0.00  | -0.01 | 0.01  | 0.06  | -0.08 |
| 62 | 6 | -0.09 | 0.03  | -0.02 | -0.04 | 0.01  | -0.01 | 0.06  | -0.03 | 0.02  |
| 63 | 6 | 0.05  | -0.03 | 0.04  | 0.02  | -0.01 | 0.02  | -0.03 | 0.02  | -0.03 |
| 64 | 6 | -0.03 | 0.02  | -0.04 | -0.01 | 0.01  | -0.02 | 0.02  | -0.02 | 0.02  |
| 65 | 8 | 0.02  | -0.01 | 0.00  | 0.01  | -0.01 | 0.00  | -0.02 | 0.01  | 0.01  |
| 66 | 1 | 0.50  | -0.23 | 0.41  | 0.21  | -0.10 | 0.17  | -0.31 | 0.14  | -0.26 |
| 67 | 6 | -0.04 | 0.02  | -0.03 | -0.02 | 0.01  | -0.01 | 0.03  | -0.01 | 0.02  |
| 68 | 1 | 0.10  | -0.04 | 0.09  | 0.04  | -0.02 | 0.04  | -0.07 | 0.02  | -0.06 |
| 69 | 1 | 0.00  | -0.31 | -0.07 | 0.00  | -0.13 | -0.03 | 0.00  | 0.20  | 0.05  |
| 70 | 1 | 0.11  | 0.22  | 0.15  | 0.05  | 0.09  | 0.06  | -0.07 | -0.13 | -0.09 |
| 71 | 6 | 0.00  | -0.01 | 0.01  | 0.00  | 0.00  | 0.00  | 0.00  | 0.00  | 0.00  |
| 72 | 1 | 0.00  | -0.01 | 0.02  | 0.00  | 0.00  | 0.01  | -0.01 | 0.01  | 0.00  |
| 73 | 1 | 0.01  | -0.01 | 0.00  | 0.00  | 0.00  | 0.00  | 0.00  | 0.01  | -0.01 |
| 74 | 1 | 0.00  | 0.00  | 0.02  | 0.00  | 0.00  | 0.01  | 0.00  | 0.00  | 0.00  |

|                |          |          |          |
|----------------|----------|----------|----------|
|                | 85       | 86       | 87       |
|                | A        | A        | A        |
| Frequencies -- | 919.6130 | 925.4857 | 935.5082 |
| Red. masses -- | 2.8550   | 2.5654   | 2.3859   |
| Frc consts --  | 1.4226   | 1.2946   | 1.2303   |
| IR Inten --    | 6.3635   | 33.7853  | 21.5974  |
| Raman Activ -- | 2.5808   | 1.7278   | 1.5821   |
| Depolar (P) -- | 0.7340   | 0.1943   | 0.6448   |
| Depolar (U) -- | 0.8466   | 0.3254   | 0.7841   |

| Atom | AN | X     | Y     | Z     | X     | Y     | Z     | X     | Y     | Z     |
|------|----|-------|-------|-------|-------|-------|-------|-------|-------|-------|
| 1    | 6  | 0.01  | -0.01 | 0.05  | 0.01  | -0.01 | 0.00  | 0.05  | -0.01 | -0.06 |
| 2    | 6  | -0.01 | 0.00  | 0.00  | 0.00  | 0.00  | 0.01  | -0.01 | 0.00  | 0.01  |
| 3    | 6  | 0.06  | 0.07  | 0.02  | 0.02  | 0.03  | 0.02  | -0.05 | 0.13  | -0.02 |
| 4    | 6  | 0.06  | 0.05  | 0.04  | 0.03  | 0.07  | -0.04 | -0.02 | -0.02 | 0.01  |
| 5    | 6  | 0.04  | -0.05 | 0.03  | -0.01 | -0.01 | 0.01  | 0.05  | 0.00  | 0.01  |
| 6    | 6  | 0.01  | 0.03  | -0.04 | 0.01  | 0.01  | -0.02 | 0.02  | 0.07  | 0.01  |
| 7    | 8  | 0.00  | 0.01  | 0.00  | 0.00  | 0.00  | 0.00  | -0.01 | -0.01 | 0.00  |
| 8    | 6  | 0.00  | -0.01 | 0.00  | -0.03 | 0.00  | -0.02 | -0.07 | -0.03 | 0.00  |
| 9    | 6  | -0.04 | -0.10 | 0.05  | -0.04 | -0.04 | 0.05  | 0.03  | 0.05  | -0.02 |
| 10   | 1  | 0.04  | -0.20 | -0.02 | -0.13 | -0.04 | 0.09  | 0.06  | 0.17  | -0.01 |
| 11   | 8  | 0.00  | 0.10  | 0.04  | -0.02 | 0.07  | 0.05  | 0.04  | -0.06 | -0.06 |
| 12   | 6  | -0.07 | -0.05 | 0.08  | -0.04 | -0.10 | -0.07 | -0.02 | -0.01 | -0.01 |
| 13   | 1  | -0.08 | -0.04 | 0.07  | -0.03 | -0.16 | -0.01 | -0.10 | -0.05 | 0.02  |
| 14   | 6  | 0.00  | 0.00  | 0.00  | -0.01 | 0.00  | 0.00  | 0.01  | 0.00  | 0.00  |
| 15   | 8  | 0.00  | 0.00  | 0.00  | 0.00  | 0.00  | 0.00  | 0.00  | 0.00  | 0.00  |
| 16   | 6  | 0.00  | -0.01 | 0.00  | 0.03  | 0.00  | 0.02  | 0.01  | -0.02 | 0.05  |

|    |   |       |       |       |       |       |       |       |       |       |
|----|---|-------|-------|-------|-------|-------|-------|-------|-------|-------|
| 17 | 1 | 0.01  | 0.01  | 0.02  | 0.02  | -0.01 | 0.01  | -0.10 | 0.03  | -0.11 |
| 18 | 1 | -0.04 | 0.01  | -0.02 | 0.04  | -0.01 | 0.03  | 0.15  | 0.00  | 0.04  |
| 19 | 1 | 0.01  | 0.00  | 0.01  | 0.02  | -0.01 | 0.00  | 0.16  | -0.02 | 0.03  |
| 20 | 6 | 0.01  | -0.05 | 0.00  | -0.02 | 0.01  | 0.01  | 0.01  | -0.03 | -0.01 |
| 21 | 1 | 0.00  | -0.10 | 0.00  | -0.06 | 0.03  | 0.05  | -0.03 | -0.01 | 0.03  |
| 22 | 6 | -0.03 | 0.02  | -0.02 | 0.00  | 0.00  | -0.01 | 0.04  | -0.02 | -0.02 |
| 23 | 1 | -0.05 | 0.04  | -0.08 | 0.01  | -0.01 | 0.04  | 0.10  | -0.09 | 0.22  |
| 24 | 1 | 0.02  | -0.01 | -0.01 | -0.03 | 0.02  | -0.02 | -0.13 | 0.08  | -0.06 |
| 25 | 1 | 0.01  | 0.00  | -0.02 | -0.02 | 0.02  | 0.00  | -0.08 | 0.07  | -0.01 |
| 26 | 6 | -0.04 | -0.01 | -0.08 | -0.01 | 0.00  | -0.03 | -0.05 | -0.07 | -0.08 |
| 27 | 1 | -0.17 | -0.20 | 0.10  | -0.06 | -0.07 | 0.04  | -0.20 | -0.22 | 0.09  |
| 28 | 1 | 0.05  | 0.27  | 0.09  | 0.01  | 0.12  | 0.03  | 0.08  | 0.15  | 0.09  |
| 29 | 6 | 0.06  | -0.02 | -0.10 | 0.04  | -0.04 | -0.12 | -0.09 | 0.07  | 0.07  |
| 30 | 1 | 0.03  | -0.01 | -0.08 | 0.06  | 0.05  | -0.09 | 0.03  | 0.19  | 0.01  |
| 31 | 1 | 0.09  | -0.09 | -0.13 | 0.09  | -0.14 | -0.07 | -0.02 | -0.05 | 0.16  |
| 32 | 6 | -0.01 | 0.01  | 0.02  | 0.01  | 0.00  | -0.01 | 0.03  | 0.00  | -0.04 |
| 33 | 1 | 0.00  | 0.04  | 0.04  | 0.01  | 0.02  | -0.01 | 0.02  | 0.00  | -0.05 |
| 34 | 6 | 0.01  | 0.00  | -0.01 | 0.00  | 0.01  | 0.01  | 0.00  | 0.02  | 0.04  |
| 35 | 1 | 0.05  | 0.00  | -0.01 | -0.01 | 0.01  | 0.01  | -0.09 | 0.00  | 0.05  |
| 36 | 6 | 0.01  | 0.03  | -0.06 | 0.04  | 0.04  | 0.03  | -0.02 | -0.01 | -0.01 |
| 37 | 1 | -0.05 | -0.04 | 0.02  | -0.03 | -0.10 | 0.21  | 0.01  | 0.03  | -0.06 |
| 38 | 1 | -0.10 | 0.00  | -0.25 | -0.12 | -0.03 | -0.30 | 0.04  | 0.00  | 0.08  |
| 39 | 1 | -0.02 | -0.07 | 0.07  | 0.00  | -0.13 | 0.19  | 0.00  | 0.04  | -0.08 |
| 40 | 6 | 0.02  | -0.06 | 0.07  | 0.01  | -0.02 | 0.03  | 0.04  | -0.03 | 0.05  |
| 41 | 1 | 0.08  | -0.03 | 0.05  | 0.03  | 0.00  | 0.01  | 0.23  | 0.13  | -0.06 |
| 42 | 6 | -0.02 | 0.01  | 0.06  | -0.01 | 0.00  | 0.03  | 0.00  | 0.06  | 0.04  |
| 43 | 1 | 0.00  | -0.09 | 0.09  | -0.02 | -0.04 | 0.06  | -0.03 | -0.19 | 0.20  |
| 44 | 1 | 0.03  | 0.00  | -0.10 | -0.01 | -0.01 | -0.03 | 0.05  | 0.03  | -0.35 |
| 45 | 1 | -0.03 | -0.10 | 0.12  | -0.02 | -0.03 | 0.01  | -0.05 | -0.16 | 0.07  |
| 46 | 6 | -0.03 | -0.02 | 0.00  | 0.00  | 0.01  | 0.00  | -0.03 | -0.04 | -0.02 |
| 47 | 1 | -0.10 | 0.01  | 0.02  | 0.08  | -0.01 | -0.04 | -0.24 | 0.03  | 0.07  |
| 48 | 6 | 0.00  | -0.02 | 0.03  | -0.01 | 0.01  | 0.02  | 0.03  | -0.06 | -0.01 |
| 49 | 1 | 0.01  | 0.08  | 0.00  | -0.02 | 0.08  | -0.02 | 0.11  | -0.04 | 0.08  |
| 50 | 1 | 0.11  | -0.04 | 0.02  | 0.04  | -0.04 | -0.03 | 0.04  | -0.02 | 0.04  |
| 51 | 6 | 0.00  | 0.02  | 0.00  | 0.01  | -0.01 | -0.01 | -0.02 | 0.05  | 0.02  |
| 52 | 1 | 0.01  | -0.02 | -0.03 | 0.03  | -0.05 | -0.04 | -0.02 | 0.05  | 0.02  |
| 53 | 6 | 0.00  | 0.00  | 0.00  | 0.00  | -0.01 | 0.00  | -0.01 | -0.01 | 0.00  |
| 54 | 1 | 0.00  | -0.01 | -0.02 | 0.00  | -0.01 | 0.00  | 0.00  | -0.02 | -0.03 |
| 55 | 6 | 0.00  | 0.00  | 0.00  | 0.01  | 0.00  | 0.00  | 0.00  | 0.00  | 0.00  |
| 56 | 1 | 0.00  | 0.00  | 0.00  | 0.00  | 0.00  | 0.01  | -0.01 | 0.01  | 0.00  |
| 57 | 6 | 0.00  | 0.00  | 0.00  | 0.00  | 0.00  | 0.00  | 0.00  | -0.01 | 0.00  |
| 58 | 1 | 0.01  | -0.01 | 0.01  | 0.00  | 0.00  | 0.00  | 0.01  | -0.01 | 0.00  |
| 59 | 8 | -0.02 | -0.02 | -0.04 | -0.01 | -0.01 | -0.02 | -0.01 | -0.04 | 0.02  |
| 60 | 8 | -0.02 | -0.04 | -0.01 | 0.06  | 0.07  | 0.04  | 0.01  | 0.01  | 0.00  |
| 61 | 8 | 0.00  | 0.05  | -0.03 | -0.01 | 0.00  | 0.00  | 0.00  | 0.03  | -0.02 |
| 62 | 6 | -0.01 | 0.07  | -0.03 | -0.08 | -0.04 | 0.01  | 0.00  | 0.00  | 0.00  |
| 63 | 6 | 0.04  | 0.08  | 0.05  | -0.01 | -0.11 | -0.03 | -0.01 | -0.02 | -0.01 |
| 64 | 6 | -0.03 | 0.05  | 0.05  | 0.02  | -0.06 | -0.08 | 0.00  | -0.01 | -0.01 |
| 65 | 8 | 0.01  | -0.02 | -0.03 | 0.01  | 0.02  | 0.02  | 0.00  | 0.00  | 0.00  |
| 66 | 1 | 0.14  | 0.05  | 0.17  | 0.08  | -0.18 | 0.00  | 0.00  | -0.02 | -0.01 |
| 67 | 6 | -0.06 | -0.10 | -0.02 | 0.05  | 0.13  | 0.01  | 0.01  | 0.02  | 0.00  |
| 68 | 1 | 0.08  | 0.09  | 0.03  | -0.04 | -0.12 | 0.01  | -0.01 | -0.02 | 0.00  |

|    |   |       |       |       |       |       |       |       |       |       |
|----|---|-------|-------|-------|-------|-------|-------|-------|-------|-------|
| 69 | 1 | 0.01  | -0.29 | -0.19 | -0.01 | 0.19  | 0.19  | 0.00  | 0.04  | 0.03  |
| 70 | 1 | 0.07  | -0.15 | -0.10 | -0.02 | 0.30  | 0.20  | -0.01 | 0.04  | 0.03  |
| 71 | 6 | 0.04  | 0.04  | -0.02 | -0.04 | -0.06 | 0.03  | -0.01 | -0.01 | 0.00  |
| 72 | 1 | 0.18  | -0.11 | -0.22 | -0.21 | 0.14  | 0.25  | -0.04 | 0.03  | 0.06  |
| 73 | 1 | -0.03 | -0.10 | -0.01 | 0.01  | 0.13  | 0.03  | 0.01  | 0.02  | 0.00  |
| 74 | 1 | -0.15 | -0.03 | 0.12  | 0.20  | 0.03  | -0.18 | 0.05  | 0.01  | -0.04 |

|                |  |          |  |          |  |          |
|----------------|--|----------|--|----------|--|----------|
|                |  | 88       |  | 89       |  | 90       |
|                |  | A        |  | A        |  | A        |
| Frequencies -- |  | 946.7631 |  | 955.8017 |  | 962.1960 |
| Red. masses -- |  | 2.9096   |  | 2.0738   |  | 1.8979   |
| Frc consts --  |  | 1.5366   |  | 1.1162   |  | 1.0352   |
| IR Inten --    |  | 32.7203  |  | 10.7087  |  | 7.7950   |
| Raman Activ -- |  | 3.3333   |  | 3.9974   |  | 2.8500   |
| Depolar (P) -- |  | 0.3738   |  | 0.1815   |  | 0.7226   |
| Depolar (U) -- |  | 0.5442   |  | 0.3072   |  | 0.8390   |

|      |    |       |       |       |       |       |       |       |       |       |
|------|----|-------|-------|-------|-------|-------|-------|-------|-------|-------|
| Atom | AN | X     | Y     | Z     | X     | Y     | Z     | X     | Y     | Z     |
| 1    | 6  | 0.03  | 0.00  | -0.03 | -0.02 | -0.03 | -0.01 | 0.05  | 0.01  | 0.02  |
| 2    | 6  | -0.01 | 0.00  | 0.01  | 0.03  | -0.01 | 0.02  | -0.04 | 0.01  | 0.02  |
| 3    | 6  | -0.04 | 0.04  | 0.00  | -0.01 | 0.02  | 0.06  | -0.02 | 0.00  | -0.08 |
| 4    | 6  | 0.04  | 0.03  | -0.02 | 0.00  | -0.03 | 0.01  | -0.04 | 0.00  | 0.02  |
| 5    | 6  | -0.02 | 0.12  | -0.04 | -0.04 | -0.03 | 0.00  | 0.04  | -0.01 | 0.03  |
| 6    | 6  | 0.03  | -0.02 | -0.07 | -0.02 | 0.06  | 0.04  | 0.02  | -0.07 | -0.03 |
| 7    | 8  | 0.00  | -0.01 | 0.00  | 0.00  | 0.01  | 0.00  | 0.00  | -0.01 | -0.01 |
| 8    | 6  | -0.03 | 0.04  | 0.00  | 0.03  | 0.12  | 0.01  | -0.03 | 0.07  | 0.04  |
| 9    | 6  | -0.06 | 0.08  | -0.04 | -0.02 | 0.03  | -0.01 | -0.01 | -0.04 | 0.00  |
| 10   | 1  | -0.13 | 0.20  | 0.02  | -0.09 | 0.01  | 0.02  | -0.01 | -0.07 | -0.01 |
| 11   | 8  | 0.03  | -0.05 | -0.02 | -0.02 | 0.01  | 0.03  | 0.00  | 0.04  | 0.01  |
| 12   | 6  | 0.01  | -0.09 | -0.02 | 0.07  | 0.00  | -0.04 | 0.01  | 0.02  | 0.00  |
| 13   | 1  | 0.01  | -0.16 | 0.06  | 0.14  | 0.01  | -0.04 | 0.08  | 0.06  | -0.03 |
| 14   | 6  | -0.02 | -0.01 | -0.02 | -0.01 | 0.00  | 0.01  | 0.02  | 0.00  | -0.01 |
| 15   | 8  | 0.00  | 0.01  | 0.00  | 0.00  | 0.00  | 0.00  | 0.00  | 0.00  | 0.00  |
| 16   | 6  | 0.02  | 0.03  | 0.03  | 0.01  | 0.10  | 0.01  | -0.01 | 0.07  | 0.05  |
| 17   | 1  | 0.00  | -0.07 | -0.04 | 0.08  | -0.20 | 0.01  | -0.08 | -0.12 | -0.13 |
| 18   | 1  | 0.18  | -0.08 | 0.11  | 0.28  | -0.20 | 0.22  | 0.37  | -0.16 | 0.21  |
| 19   | 1  | -0.09 | -0.02 | -0.10 | -0.41 | -0.02 | -0.32 | -0.20 | -0.04 | -0.26 |
| 20   | 6  | 0.00  | 0.02  | 0.03  | -0.03 | 0.03  | 0.02  | 0.03  | -0.03 | 0.02  |
| 21   | 1  | -0.02 | -0.01 | 0.03  | -0.04 | 0.01  | 0.01  | 0.01  | -0.07 | 0.02  |
| 22   | 6  | 0.02  | -0.01 | -0.02 | -0.01 | -0.02 | -0.02 | 0.00  | 0.03  | -0.02 |
| 23   | 1  | 0.07  | -0.06 | 0.15  | 0.04  | 0.03  | 0.05  | -0.03 | -0.02 | -0.03 |
| 24   | 1  | -0.09 | 0.06  | -0.05 | -0.06 | 0.10  | -0.10 | 0.02  | -0.06 | 0.05  |
| 25   | 1  | -0.05 | 0.04  | -0.01 | 0.06  | -0.02 | 0.09  | -0.06 | 0.04  | -0.10 |
| 26   | 6  | 0.00  | 0.01  | -0.06 | 0.00  | -0.06 | 0.05  | 0.01  | 0.07  | -0.05 |
| 27   | 1  | -0.10 | -0.07 | 0.04  | 0.08  | 0.00  | -0.03 | -0.07 | -0.01 | 0.03  |
| 28   | 1  | 0.04  | 0.18  | 0.04  | -0.08 | -0.12 | -0.02 | 0.10  | 0.13  | 0.03  |
| 29   | 6  | -0.05 | -0.01 | 0.04  | 0.02  | -0.12 | 0.01  | 0.00  | -0.05 | -0.02 |
| 30   | 1  | 0.05  | 0.08  | 0.00  | 0.02  | -0.13 | 0.02  | 0.05  | 0.02  | -0.04 |
| 31   | 1  | 0.00  | -0.10 | 0.14  | 0.02  | -0.14 | 0.00  | 0.08  | -0.22 | 0.01  |
| 32   | 6  | 0.03  | -0.01 | -0.05 | 0.00  | -0.02 | -0.04 | 0.02  | -0.01 | -0.06 |
| 33   | 1  | 0.01  | -0.04 | -0.07 | -0.01 | -0.11 | -0.06 | 0.00  | -0.01 | -0.08 |
| 34   | 6  | -0.01 | 0.00  | 0.01  | -0.02 | -0.02 | -0.03 | 0.00  | -0.02 | -0.01 |
| 35   | 1  | -0.09 | -0.03 | 0.04  | -0.02 | -0.10 | 0.03  | -0.04 | -0.11 | 0.06  |
| 36   | 6  | 0.03  | 0.02  | 0.01  | -0.01 | -0.02 | -0.01 | -0.02 | -0.01 | 0.00  |



|    |   |       |       |       |       |       |       |       |       |       |
|----|---|-------|-------|-------|-------|-------|-------|-------|-------|-------|
| 37 | 1 | -0.04 | -0.04 | 0.05  | 0.00  | 0.03  | -0.08 | 0.03  | 0.03  | -0.04 |
| 38 | 1 | -0.08 | 0.00  | -0.14 | 0.04  | 0.01  | 0.09  | 0.06  | 0.00  | 0.11  |
| 39 | 1 | 0.01  | -0.05 | 0.13  | 0.00  | 0.04  | -0.03 | -0.01 | 0.05  | -0.10 |
| 40 | 6 | -0.02 | 0.00  | 0.01  | 0.01  | -0.04 | 0.01  | -0.01 | 0.04  | 0.00  |
| 41 | 1 | 0.04  | 0.05  | -0.02 | 0.07  | 0.02  | -0.04 | -0.08 | -0.02 | 0.04  |
| 42 | 6 | 0.00  | -0.06 | 0.05  | -0.01 | 0.06  | 0.00  | 0.01  | -0.06 | -0.02 |
| 43 | 1 | -0.03 | 0.04  | 0.02  | 0.00  | -0.12 | 0.11  | 0.01  | 0.13  | -0.13 |
| 44 | 1 | -0.07 | -0.05 | 0.23  | 0.07  | 0.05  | -0.32 | -0.06 | -0.05 | 0.30  |
| 45 | 1 | 0.00  | 0.06  | -0.02 | -0.04 | -0.13 | 0.08  | 0.04  | 0.14  | -0.10 |
| 46 | 6 | 0.09  | 0.06  | -0.01 | -0.01 | -0.01 | 0.00  | -0.03 | -0.01 | -0.01 |
| 47 | 1 | 0.36  | -0.04 | -0.11 | 0.10  | 0.02  | -0.13 | -0.28 | 0.01  | 0.19  |
| 48 | 6 | -0.07 | 0.10  | 0.00  | 0.00  | -0.04 | 0.02  | 0.04  | 0.00  | -0.03 |
| 49 | 1 | -0.07 | 0.17  | -0.02 | -0.08 | 0.01  | -0.09 | 0.14  | -0.07 | 0.13  |
| 50 | 1 | -0.17 | -0.03 | -0.16 | 0.11  | -0.07 | 0.00  | -0.05 | 0.10  | 0.07  |
| 51 | 6 | -0.01 | -0.09 | -0.02 | 0.04  | 0.03  | -0.02 | -0.05 | 0.00  | 0.04  |
| 52 | 1 | 0.07  | -0.17 | -0.07 | 0.04  | 0.00  | -0.04 | -0.08 | 0.07  | 0.09  |
| 53 | 6 | 0.00  | -0.02 | 0.01  | 0.00  | 0.00  | -0.01 | 0.00  | 0.01  | 0.00  |
| 54 | 1 | 0.03  | -0.02 | 0.02  | -0.03 | 0.00  | 0.01  | 0.02  | 0.01  | -0.02 |
| 55 | 6 | 0.02  | 0.00  | 0.02  | 0.00  | 0.00  | 0.00  | 0.00  | 0.00  | 0.00  |
| 56 | 1 | 0.01  | 0.02  | 0.01  | 0.00  | 0.00  | -0.01 | 0.00  | -0.01 | 0.00  |
| 57 | 6 | 0.00  | 0.03  | -0.01 | 0.00  | -0.01 | 0.00  | 0.00  | 0.00  | 0.01  |
| 58 | 1 | -0.02 | 0.04  | -0.02 | 0.00  | -0.01 | 0.02  | 0.01  | -0.01 | -0.01 |
| 59 | 8 | 0.01  | -0.01 | 0.01  | -0.01 | 0.03  | -0.04 | 0.01  | -0.03 | 0.04  |
| 60 | 8 | 0.02  | -0.04 | 0.07  | 0.00  | -0.01 | 0.02  | 0.00  | 0.01  | -0.01 |
| 61 | 8 | -0.03 | -0.11 | 0.10  | 0.00  | 0.02  | -0.03 | 0.01  | 0.02  | 0.00  |
| 62 | 6 | -0.02 | 0.01  | -0.03 | 0.00  | -0.01 | 0.00  | 0.00  | 0.00  | 0.00  |
| 63 | 6 | 0.02  | 0.04  | 0.02  | 0.00  | 0.01  | 0.00  | 0.00  | 0.00  | 0.00  |
| 64 | 6 | -0.01 | 0.03  | 0.02  | 0.00  | 0.00  | 0.00  | 0.00  | -0.01 | 0.00  |
| 65 | 8 | 0.01  | 0.01  | -0.03 | 0.00  | 0.00  | 0.00  | 0.00  | 0.00  | 0.01  |
| 66 | 1 | 0.09  | 0.07  | 0.07  | 0.00  | 0.02  | 0.00  | -0.02 | -0.01 | -0.01 |
| 67 | 6 | -0.03 | -0.05 | -0.01 | 0.00  | -0.01 | 0.00  | 0.01  | 0.01  | 0.00  |
| 68 | 1 | 0.04  | 0.07  | 0.02  | 0.01  | 0.02  | 0.00  | -0.01 | -0.01 | 0.00  |
| 69 | 1 | 0.01  | -0.14 | -0.11 | 0.00  | -0.02 | -0.02 | 0.00  | 0.03  | 0.02  |
| 70 | 1 | 0.04  | -0.09 | -0.07 | 0.00  | -0.02 | -0.02 | -0.01 | 0.01  | 0.01  |
| 71 | 6 | 0.02  | 0.03  | 0.01  | 0.00  | 0.01  | 0.00  | 0.00  | -0.01 | 0.00  |
| 72 | 1 | 0.10  | -0.07 | -0.13 | 0.03  | -0.02 | -0.03 | -0.02 | 0.01  | 0.03  |
| 73 | 1 | -0.05 | -0.06 | 0.02  | -0.01 | -0.02 | 0.00  | 0.01  | 0.01  | -0.01 |
| 74 | 1 | -0.13 | -0.02 | 0.08  | -0.03 | 0.00  | 0.02  | 0.03  | 0.01  | -0.02 |

|    |    |    |
|----|----|----|
| 91 | 92 | 93 |
| A  | A  | A  |

|                |          |          |          |
|----------------|----------|----------|----------|
| Frequencies -- | 962.7362 | 968.5269 | 971.7745 |
| Red. masses -- | 2.1038   | 2.7212   | 2.5361   |
| Frc consts --  | 1.1489   | 1.5040   | 1.4110   |
| IR Inten --    | 23.4175  | 11.9936  | 8.3123   |
| Raman Activ -- | 4.4487   | 1.8147   | 4.7399   |
| Depolar (P) -- | 0.2654   | 0.3229   | 0.4826   |
| Depolar (U) -- | 0.4194   | 0.4882   | 0.6510   |

| Atom | AN | X     | Y     | Z     | X     | Y     | Z     | X     | Y     | Z     |
|------|----|-------|-------|-------|-------|-------|-------|-------|-------|-------|
| 1    | 6  | -0.05 | -0.01 | -0.02 | 0.02  | 0.03  | -0.02 | -0.06 | -0.01 | -0.04 |
| 2    | 6  | 0.02  | -0.01 | 0.04  | -0.02 | 0.00  | -0.01 | 0.06  | -0.02 | -0.02 |
| 3    | 6  | 0.03  | -0.03 | 0.04  | -0.04 | -0.04 | -0.08 | 0.00  | 0.01  | 0.09  |
| 4    | 6  | 0.02  | 0.06  | 0.00  | 0.00  | 0.08  | -0.04 | -0.01 | 0.00  | 0.09  |

|    |   |       |       |       |       |       |       |       |       |       |
|----|---|-------|-------|-------|-------|-------|-------|-------|-------|-------|
| 5  | 6 | 0.00  | -0.04 | 0.03  | -0.07 | -0.06 | 0.06  | 0.04  | -0.05 | 0.05  |
| 6  | 6 | -0.01 | -0.02 | -0.01 | -0.04 | -0.02 | 0.05  | 0.01  | -0.05 | -0.06 |
| 7  | 8 | 0.00  | 0.01  | -0.01 | 0.00  | -0.02 | 0.00  | 0.00  | 0.02  | 0.01  |
| 8  | 6 | 0.05  | 0.03  | 0.09  | -0.05 | -0.02 | -0.03 | 0.00  | 0.00  | -0.08 |
| 9  | 6 | 0.03  | 0.00  | 0.00  | -0.05 | 0.04  | -0.03 | 0.02  | 0.09  | -0.04 |
| 10 | 1 | 0.11  | 0.05  | -0.03 | -0.15 | 0.15  | 0.04  | -0.02 | 0.14  | 0.00  |
| 11 | 8 | 0.04  | -0.06 | -0.08 | 0.02  | -0.01 | 0.00  | -0.01 | -0.03 | 0.01  |
| 12 | 6 | -0.07 | -0.07 | 0.01  | 0.01  | -0.07 | -0.05 | 0.03  | -0.06 | -0.04 |
| 13 | 1 | -0.17 | -0.12 | 0.05  | 0.11  | -0.11 | 0.01  | 0.04  | -0.07 | -0.03 |
| 14 | 6 | 0.01  | 0.00  | 0.00  | 0.01  | 0.01  | 0.02  | 0.02  | 0.00  | -0.01 |
| 15 | 8 | 0.00  | 0.00  | 0.00  | 0.00  | 0.00  | 0.00  | 0.00  | 0.00  | 0.00  |
| 16 | 6 | -0.09 | 0.03  | 0.02  | 0.04  | -0.02 | 0.01  | 0.07  | 0.00  | -0.05 |
| 17 | 1 | -0.27 | 0.04  | -0.26 | 0.08  | -0.01 | 0.07  | 0.30  | -0.07 | 0.30  |
| 18 | 1 | 0.25  | -0.02 | 0.04  | -0.05 | 0.00  | 0.00  | -0.27 | 0.00  | -0.04 |
| 19 | 1 | 0.05  | -0.01 | -0.13 | 0.02  | 0.00  | 0.06  | -0.16 | 0.03  | 0.08  |
| 20 | 6 | 0.00  | 0.03  | -0.03 | 0.01  | 0.02  | 0.03  | -0.04 | 0.05  | -0.01 |
| 21 | 1 | 0.04  | 0.08  | -0.04 | 0.01  | 0.03  | 0.03  | -0.04 | 0.09  | 0.00  |
| 22 | 6 | -0.01 | -0.03 | 0.01  | 0.02  | 0.01  | 0.02  | 0.01  | -0.04 | 0.01  |
| 23 | 1 | 0.01  | 0.06  | -0.02 | 0.00  | -0.05 | 0.02  | 0.06  | 0.02  | 0.08  |
| 24 | 1 | 0.00  | 0.06  | -0.06 | 0.02  | -0.06 | 0.07  | -0.05 | 0.10  | -0.09 |
| 25 | 1 | 0.08  | -0.05 | 0.11  | -0.05 | 0.02  | -0.07 | 0.09  | -0.05 | 0.14  |
| 26 | 6 | 0.03  | 0.03  | 0.01  | 0.02  | 0.02  | 0.06  | 0.06  | 0.07  | -0.04 |
| 27 | 1 | 0.05  | 0.02  | 0.00  | 0.09  | 0.15  | -0.05 | 0.04  | -0.07 | 0.04  |
| 28 | 1 | -0.01 | 0.03  | -0.01 | 0.02  | -0.22 | -0.05 | 0.01  | 0.26  | 0.02  |
| 29 | 6 | 0.03  | 0.06  | 0.11  | -0.06 | 0.00  | -0.01 | -0.06 | -0.05 | 0.05  |
| 30 | 1 | -0.12 | -0.30 | 0.11  | 0.08  | 0.20  | -0.05 | 0.03  | 0.10  | 0.03  |
| 31 | 1 | -0.12 | 0.35  | -0.14 | 0.04  | -0.18 | 0.16  | -0.02 | -0.13 | 0.18  |
| 32 | 6 | 0.00  | -0.01 | -0.06 | 0.02  | 0.00  | 0.00  | -0.02 | 0.00  | 0.06  |
| 33 | 1 | 0.05  | -0.10 | -0.04 | 0.00  | 0.04  | -0.01 | -0.01 | -0.04 | 0.06  |
| 34 | 6 | -0.02 | -0.02 | -0.04 | 0.01  | 0.01  | 0.03  | 0.00  | 0.01  | 0.01  |
| 35 | 1 | 0.00  | -0.17 | 0.09  | -0.05 | 0.07  | -0.02 | 0.01  | 0.13  | -0.09 |
| 36 | 6 | 0.02  | 0.06  | -0.01 | 0.04  | 0.05  | 0.04  | -0.05 | 0.02  | -0.05 |
| 37 | 1 | 0.00  | -0.10 | 0.22  | -0.03 | -0.09 | 0.20  | 0.06  | -0.03 | 0.07  |
| 38 | 1 | -0.10 | -0.03 | -0.32 | -0.11 | -0.02 | -0.26 | 0.04  | -0.04 | -0.06 |
| 39 | 1 | -0.01 | -0.13 | 0.07  | 0.01  | -0.12 | 0.19  | -0.03 | -0.02 | -0.23 |
| 40 | 6 | -0.01 | -0.02 | 0.01  | 0.00  | 0.04  | -0.07 | -0.04 | -0.05 | 0.06  |
| 41 | 1 | -0.06 | -0.07 | 0.04  | -0.09 | -0.03 | -0.02 | -0.05 | -0.06 | 0.07  |
| 42 | 6 | -0.01 | -0.01 | -0.01 | 0.01  | 0.01  | -0.05 | -0.02 | -0.05 | 0.01  |
| 43 | 1 | 0.02  | 0.04  | -0.07 | 0.01  | 0.04  | -0.07 | 0.04  | 0.09  | -0.14 |
| 44 | 1 | 0.01  | -0.01 | 0.08  | 0.01  | 0.02  | -0.02 | -0.01 | -0.04 | 0.24  |
| 45 | 1 | 0.01  | 0.02  | 0.03  | 0.02  | 0.04  | -0.06 | 0.02  | 0.05  | 0.06  |
| 46 | 6 | -0.03 | -0.01 | -0.01 | -0.09 | 0.00  | -0.04 | -0.04 | -0.01 | 0.00  |
| 47 | 1 | -0.09 | 0.01  | 0.01  | -0.13 | 0.10  | -0.17 | -0.25 | -0.01 | 0.18  |
| 48 | 6 | 0.03  | -0.01 | 0.02  | 0.08  | -0.08 | 0.05  | 0.03  | 0.02  | -0.01 |
| 49 | 1 | 0.03  | 0.01  | 0.02  | 0.07  | -0.01 | 0.01  | 0.11  | -0.03 | 0.10  |
| 50 | 1 | 0.08  | 0.02  | 0.06  | 0.29  | -0.01 | 0.16  | -0.01 | 0.10  | 0.08  |
| 51 | 6 | 0.00  | 0.01  | 0.00  | 0.03  | 0.05  | -0.01 | -0.04 | 0.00  | 0.03  |
| 52 | 1 | -0.01 | 0.02  | 0.01  | -0.03 | 0.09  | 0.00  | -0.06 | 0.04  | 0.06  |
| 53 | 6 | 0.00  | 0.01  | 0.00  | 0.00  | 0.02  | -0.01 | 0.00  | 0.02  | 0.00  |
| 54 | 1 | 0.00  | 0.01  | 0.00  | -0.02 | 0.02  | -0.01 | 0.02  | 0.02  | 0.01  |
| 55 | 6 | 0.00  | 0.00  | 0.00  | -0.01 | 0.00  | -0.01 | 0.00  | 0.00  | 0.00  |
| 56 | 1 | 0.00  | -0.01 | 0.00  | -0.01 | -0.03 | 0.00  | 0.00  | -0.02 | 0.00  |

|    |   |       |       |       |       |       |       |       |       |       |
|----|---|-------|-------|-------|-------|-------|-------|-------|-------|-------|
| 57 | 6 | 0.00  | -0.01 | 0.00  | 0.00  | -0.03 | 0.01  | 0.00  | -0.01 | 0.01  |
| 58 | 1 | 0.01  | -0.01 | 0.01  | 0.03  | -0.04 | 0.04  | 0.02  | -0.01 | 0.00  |
| 59 | 8 | 0.00  | 0.02  | -0.04 | 0.01  | -0.03 | 0.07  | 0.01  | 0.05  | -0.09 |
| 60 | 8 | 0.01  | 0.01  | 0.01  | 0.03  | -0.04 | 0.09  | 0.01  | 0.01  | 0.01  |
| 61 | 8 | 0.01  | 0.02  | -0.02 | 0.01  | 0.03  | -0.06 | 0.02  | 0.03  | -0.02 |
| 62 | 6 | -0.01 | 0.01  | -0.01 | -0.03 | -0.03 | -0.03 | 0.00  | 0.01  | 0.00  |
| 63 | 6 | 0.00  | -0.01 | 0.00  | 0.02  | 0.02  | 0.00  | 0.00  | -0.01 | 0.00  |
| 64 | 6 | 0.00  | 0.00  | 0.00  | 0.00  | 0.02  | 0.01  | 0.00  | 0.00  | 0.00  |
| 65 | 8 | 0.00  | 0.00  | -0.01 | 0.02  | 0.02  | -0.03 | 0.00  | 0.00  | 0.00  |
| 66 | 1 | 0.03  | -0.02 | 0.02  | 0.08  | 0.10  | 0.04  | 0.01  | -0.01 | 0.00  |
| 67 | 6 | 0.00  | 0.01  | 0.00  | -0.03 | -0.03 | 0.00  | 0.00  | 0.00  | 0.00  |
| 68 | 1 | 0.00  | -0.01 | 0.00  | 0.04  | 0.09  | 0.02  | 0.00  | -0.01 | 0.00  |
| 69 | 1 | 0.00  | -0.01 | 0.01  | 0.01  | -0.11 | -0.10 | 0.00  | 0.00  | 0.01  |
| 70 | 1 | 0.01  | 0.03  | 0.02  | 0.04  | -0.09 | -0.07 | 0.00  | 0.01  | 0.01  |
| 71 | 6 | 0.00  | 0.00  | 0.00  | 0.01  | 0.04  | 0.02  | 0.00  | 0.00  | 0.00  |
| 72 | 1 | -0.01 | 0.01  | 0.01  | 0.11  | -0.08 | -0.14 | -0.01 | 0.01  | 0.02  |
| 73 | 1 | 0.00  | 0.01  | 0.00  | -0.07 | -0.08 | 0.03  | 0.01  | 0.01  | 0.00  |
| 74 | 1 | 0.02  | 0.00  | -0.02 | -0.15 | -0.02 | 0.11  | 0.02  | 0.01  | -0.02 |

|                | 94       | 95       | 96        |
|----------------|----------|----------|-----------|
|                | A        | A        | A         |
| Frequencies -- | 984.7888 | 994.6222 | 1002.0581 |
| Red. masses -- | 2.1630   | 2.1626   | 2.7032    |
| Frc consts --  | 1.2359   | 1.2605   | 1.5992    |
| IR Inten --    | 9.9824   | 14.7581  | 12.1626   |
| Raman Activ -- | 2.1081   | 1.7537   | 2.5574    |
| Depolar (P) -- | 0.6954   | 0.4428   | 0.5045    |
| Depolar (U) -- | 0.8203   | 0.6138   | 0.6706    |

| Atom | AN | X     | Y     | Z     | X     | Y     | Z     | X     | Y     | Z     |
|------|----|-------|-------|-------|-------|-------|-------|-------|-------|-------|
| 1    | 6  | 0.00  | 0.00  | 0.04  | -0.03 | 0.00  | 0.00  | 0.00  | -0.03 | 0.05  |
| 2    | 6  | 0.00  | 0.01  | -0.04 | 0.00  | 0.00  | -0.01 | 0.00  | 0.00  | -0.03 |
| 3    | 6  | 0.04  | -0.02 | -0.03 | 0.11  | -0.05 | -0.09 | 0.13  | -0.04 | -0.06 |
| 4    | 6  | 0.01  | 0.03  | -0.05 | -0.05 | 0.03  | -0.03 | -0.03 | -0.01 | -0.03 |
| 5    | 6  | -0.01 | 0.02  | -0.01 | 0.04  | -0.05 | -0.04 | -0.06 | 0.12  | 0.03  |
| 6    | 6  | 0.00  | 0.01  | 0.01  | 0.02  | 0.00  | 0.04  | 0.02  | 0.01  | -0.03 |
| 7    | 8  | 0.01  | 0.01  | 0.01  | 0.00  | 0.00  | 0.00  | 0.00  | 0.00  | 0.00  |
| 8    | 6  | 0.01  | 0.04  | -0.04 | 0.00  | 0.01  | -0.01 | 0.03  | 0.02  | -0.01 |
| 9    | 6  | 0.10  | 0.00  | -0.01 | -0.01 | 0.02  | -0.01 | 0.00  | 0.03  | -0.01 |
| 10   | 1  | 0.31  | -0.13 | -0.14 | -0.06 | 0.06  | 0.02  | -0.03 | 0.02  | 0.00  |
| 11   | 8  | 0.04  | 0.01  | -0.05 | 0.00  | -0.01 | 0.01  | -0.02 | -0.02 | 0.01  |
| 12   | 6  | -0.09 | -0.02 | 0.10  | 0.01  | -0.04 | -0.05 | 0.05  | -0.03 | -0.02 |
| 13   | 1  | -0.32 | -0.05 | 0.10  | 0.10  | -0.05 | -0.03 | 0.08  | -0.02 | -0.02 |
| 14   | 6  | 0.00  | 0.00  | 0.00  | 0.00  | 0.00  | -0.01 | 0.01  | 0.00  | 0.00  |
| 15   | 8  | 0.00  | 0.00  | 0.00  | 0.00  | 0.00  | 0.00  | 0.00  | 0.00  | 0.00  |
| 16   | 6  | 0.05  | 0.05  | -0.02 | 0.00  | 0.00  | 0.00  | 0.00  | -0.01 | -0.02 |
| 17   | 1  | 0.24  | -0.15 | 0.21  | 0.01  | -0.01 | 0.01  | 0.04  | 0.01  | 0.05  |
| 18   | 1  | -0.03 | -0.11 | 0.10  | -0.01 | 0.00  | 0.00  | -0.09 | 0.03  | -0.04 |
| 19   | 1  | -0.33 | 0.01  | -0.11 | 0.00  | 0.00  | 0.00  | 0.00  | 0.01  | 0.04  |
| 20   | 6  | 0.01  | -0.06 | -0.06 | -0.02 | 0.05  | 0.01  | -0.08 | 0.04  | 0.03  |
| 21   | 1  | 0.01  | -0.11 | -0.07 | -0.02 | 0.07  | 0.02  | -0.12 | -0.01 | 0.05  |
| 22   | 6  | -0.03 | 0.03  | 0.01  | -0.04 | -0.01 | 0.03  | -0.05 | 0.01  | 0.00  |
| 23   | 1  | -0.08 | 0.06  | -0.16 | -0.07 | 0.13  | -0.20 | -0.07 | 0.12  | -0.18 |
| 24   | 1  | 0.10  | -0.08 | 0.06  | 0.11  | -0.02 | 0.00  | 0.07  | 0.02  | -0.04 |

|    |   |       |       |       |       |       |       |       |       |       |
|----|---|-------|-------|-------|-------|-------|-------|-------|-------|-------|
| 25 | 1 | 0.04  | -0.04 | -0.03 | 0.13  | -0.10 | 0.09  | 0.09  | -0.07 | 0.06  |
| 26 | 6 | -0.03 | -0.02 | 0.01  | -0.05 | -0.03 | -0.04 | -0.06 | -0.05 | -0.05 |
| 27 | 1 | -0.04 | 0.02  | -0.01 | -0.10 | -0.11 | 0.04  | -0.09 | -0.19 | 0.03  |
| 28 | 1 | -0.01 | -0.06 | 0.00  | 0.08  | 0.00  | 0.05  | 0.05  | 0.05  | 0.05  |
| 29 | 6 | -0.10 | -0.05 | 0.11  | 0.00  | -0.01 | 0.00  | 0.06  | -0.01 | 0.01  |
| 30 | 1 | 0.04  | 0.11  | 0.06  | -0.01 | -0.02 | 0.01  | -0.08 | -0.18 | 0.06  |
| 31 | 1 | 0.03  | -0.31 | 0.18  | -0.02 | 0.03  | 0.01  | -0.06 | 0.21  | -0.10 |
| 32 | 6 | -0.02 | -0.01 | 0.05  | 0.00  | 0.00  | 0.00  | 0.00  | -0.01 | 0.00  |
| 33 | 1 | -0.07 | -0.01 | 0.01  | 0.00  | -0.02 | -0.01 | -0.03 | -0.05 | -0.03 |
| 34 | 6 | 0.00  | -0.02 | 0.00  | 0.00  | 0.00  | 0.00  | 0.00  | -0.01 | 0.01  |
| 35 | 1 | 0.02  | 0.07  | -0.07 | -0.01 | 0.01  | 0.00  | -0.02 | 0.03  | -0.03 |
| 36 | 6 | 0.03  | 0.03  | 0.03  | -0.05 | 0.05  | 0.05  | -0.02 | -0.02 | 0.03  |
| 37 | 1 | -0.02 | -0.06 | 0.14  | 0.19  | -0.07 | 0.37  | 0.06  | 0.03  | 0.01  |
| 38 | 1 | -0.09 | -0.01 | -0.18 | 0.12  | -0.10 | -0.06 | 0.09  | -0.01 | 0.16  |
| 39 | 1 | 0.01  | -0.08 | 0.12  | -0.02 | -0.06 | -0.31 | 0.01  | 0.04  | -0.12 |
| 40 | 6 | 0.02  | 0.01  | -0.01 | 0.02  | 0.06  | 0.03  | 0.03  | 0.05  | 0.05  |
| 41 | 1 | 0.01  | -0.01 | 0.00  | -0.04 | -0.02 | 0.08  | 0.00  | 0.00  | 0.09  |
| 42 | 6 | 0.01  | 0.01  | 0.00  | 0.04  | 0.04  | 0.00  | 0.03  | -0.01 | 0.04  |
| 43 | 1 | -0.02 | -0.02 | 0.04  | -0.07 | -0.11 | 0.19  | -0.09 | -0.05 | 0.17  |
| 44 | 1 | 0.00  | 0.01  | -0.04 | -0.03 | 0.02  | -0.20 | -0.09 | -0.02 | 0.00  |
| 45 | 1 | 0.00  | 0.00  | -0.03 | -0.02 | -0.03 | -0.15 | -0.02 | 0.03  | -0.16 |
| 46 | 6 | 0.01  | 0.01  | -0.01 | 0.06  | -0.03 | 0.10  | -0.07 | 0.10  | -0.13 |
| 47 | 1 | 0.04  | 0.01  | -0.03 | 0.11  | -0.14 | 0.22  | -0.36 | 0.23  | -0.08 |
| 48 | 6 | -0.01 | 0.00  | 0.01  | -0.04 | 0.01  | -0.09 | 0.08  | -0.05 | 0.07  |
| 49 | 1 | -0.01 | 0.03  | -0.01 | -0.11 | -0.24 | -0.07 | 0.30  | 0.22  | 0.20  |
| 50 | 1 | 0.00  | -0.04 | -0.03 | -0.28 | 0.07  | -0.06 | 0.19  | -0.10 | 0.02  |
| 51 | 6 | 0.01  | 0.00  | -0.01 | -0.03 | 0.00  | 0.04  | 0.00  | 0.03  | -0.01 |
| 52 | 1 | 0.02  | -0.02 | -0.02 | -0.06 | 0.08  | 0.10  | 0.05  | -0.07 | -0.08 |
| 53 | 6 | 0.00  | -0.01 | 0.00  | -0.01 | -0.03 | 0.00  | 0.00  | 0.01  | 0.00  |
| 54 | 1 | -0.01 | -0.01 | -0.01 | -0.02 | -0.04 | -0.02 | -0.01 | 0.00  | -0.02 |
| 55 | 6 | 0.00  | 0.00  | 0.00  | 0.01  | 0.01  | 0.01  | 0.00  | 0.00  | 0.00  |
| 56 | 1 | 0.00  | 0.01  | 0.00  | 0.00  | 0.04  | 0.00  | 0.00  | -0.02 | 0.00  |
| 57 | 6 | 0.00  | 0.01  | 0.00  | -0.01 | 0.03  | -0.01 | 0.00  | -0.02 | 0.01  |
| 58 | 1 | -0.01 | 0.01  | -0.01 | -0.04 | 0.04  | -0.05 | 0.03  | -0.03 | 0.03  |
| 59 | 8 | -0.01 | -0.02 | 0.02  | -0.02 | -0.02 | 0.02  | -0.02 | -0.01 | -0.01 |
| 60 | 8 | -0.02 | 0.03  | -0.06 | 0.01  | -0.01 | 0.04  | 0.00  | 0.01  | -0.01 |
| 61 | 8 | -0.01 | -0.01 | 0.01  | 0.00  | 0.04  | -0.02 | -0.01 | -0.10 | 0.05  |
| 62 | 6 | 0.02  | 0.01  | 0.01  | -0.01 | -0.02 | -0.01 | 0.00  | -0.01 | 0.00  |
| 63 | 6 | -0.01 | 0.00  | 0.00  | 0.01  | 0.00  | -0.01 | -0.01 | 0.00  | 0.00  |
| 64 | 6 | 0.00  | -0.01 | 0.00  | 0.01  | 0.01  | 0.00  | 0.00  | -0.01 | 0.00  |
| 65 | 8 | -0.01 | -0.01 | 0.01  | 0.01  | 0.01  | -0.01 | 0.00  | 0.00  | 0.00  |
| 66 | 1 | -0.04 | -0.06 | -0.01 | 0.04  | 0.07  | 0.00  | -0.01 | -0.03 | 0.00  |
| 67 | 6 | 0.01  | 0.01  | 0.00  | -0.01 | -0.01 | 0.01  | 0.00  | 0.01  | 0.00  |
| 68 | 1 | -0.02 | -0.05 | -0.01 | 0.02  | 0.06  | 0.01  | 0.00  | -0.01 | 0.00  |
| 69 | 1 | -0.01 | 0.04  | 0.04  | 0.01  | -0.04 | -0.05 | 0.00  | 0.01  | 0.01  |
| 70 | 1 | -0.02 | 0.04  | 0.03  | 0.02  | -0.05 | -0.04 | 0.00  | 0.02  | 0.01  |
| 71 | 6 | 0.00  | -0.02 | -0.01 | 0.00  | 0.02  | 0.01  | 0.00  | 0.00  | 0.00  |
| 72 | 1 | -0.04 | 0.03  | 0.05  | 0.03  | -0.03 | -0.03 | 0.02  | -0.01 | -0.02 |
| 73 | 1 | 0.04  | 0.03  | -0.02 | -0.02 | -0.03 | 0.01  | 0.00  | -0.01 | 0.00  |
| 74 | 1 | 0.06  | 0.01  | -0.04 | -0.05 | 0.00  | 0.05  | -0.02 | 0.00  | 0.00  |

97

A

98

A

99

A

|                |           |           |           |
|----------------|-----------|-----------|-----------|
| Frequencies -- | 1011.5509 | 1017.7638 | 1022.4549 |
| Red. masses -- | 2.6555    | 2.3976    | 2.1448    |
| Frc consts --  | 1.6009    | 1.4633    | 1.3211    |
| IR Inten --    | 4.8801    | 30.0425   | 0.9472    |
| Raman Activ -- | 6.6943    | 3.9798    | 2.7037    |
| Depolar (P) -- | 0.7408    | 0.5333    | 0.2664    |
| Depolar (U) -- | 0.8511    | 0.6956    | 0.4208    |

  

| Atom | AN | X     | Y     | Z     | X     | Y     | Z     | X     | Y     | Z     |
|------|----|-------|-------|-------|-------|-------|-------|-------|-------|-------|
| 1    | 6  | 0.00  | -0.01 | 0.01  | -0.05 | 0.03  | -0.04 | 0.01  | -0.02 | 0.02  |
| 2    | 6  | 0.00  | 0.00  | 0.00  | 0.01  | -0.01 | 0.05  | 0.00  | 0.00  | 0.01  |
| 3    | 6  | 0.00  | 0.03  | 0.02  | 0.07  | -0.03 | 0.01  | 0.00  | 0.04  | 0.07  |
| 4    | 6  | 0.00  | 0.00  | -0.04 | 0.01  | -0.01 | 0.03  | -0.01 | -0.02 | -0.10 |
| 5    | 6  | -0.03 | 0.00  | -0.02 | 0.01  | 0.03  | 0.00  | -0.06 | -0.01 | -0.02 |
| 6    | 6  | 0.01  | 0.00  | 0.00  | 0.00  | 0.01  | 0.00  | 0.01  | -0.02 | 0.00  |
| 7    | 8  | 0.00  | 0.00  | 0.00  | -0.01 | 0.00  | -0.01 | 0.00  | 0.01  | 0.00  |
| 8    | 6  | 0.00  | 0.00  | 0.00  | -0.03 | -0.05 | 0.02  | 0.01  | 0.00  | 0.00  |
| 9    | 6  | 0.01  | 0.00  | 0.00  | 0.05  | 0.09  | -0.06 | 0.06  | 0.02  | -0.01 |
| 10   | 1  | 0.02  | -0.02 | 0.00  | 0.01  | 0.00  | -0.04 | 0.07  | -0.07 | -0.02 |
| 11   | 8  | 0.00  | 0.00  | 0.00  | -0.05 | -0.04 | 0.09  | -0.03 | -0.01 | 0.03  |
| 12   | 6  | 0.00  | 0.01  | 0.00  | -0.02 | 0.00  | 0.05  | -0.02 | 0.04  | -0.01 |
| 13   | 1  | -0.04 | 0.00  | 0.01  | -0.06 | 0.01  | 0.04  | -0.17 | 0.00  | 0.01  |
| 14   | 6  | 0.00  | -0.05 | 0.02  | 0.00  | 0.00  | 0.01  | 0.02  | 0.01  | -0.01 |
| 15   | 8  | 0.00  | 0.03  | 0.00  | 0.00  | 0.00  | 0.00  | 0.00  | -0.01 | 0.00  |
| 16   | 6  | 0.00  | 0.00  | 0.00  | -0.03 | 0.00  | 0.05  | 0.00  | 0.00  | 0.00  |
| 17   | 1  | 0.01  | 0.00  | 0.01  | -0.20 | 0.01  | -0.20 | -0.01 | 0.00  | -0.02 |
| 18   | 1  | -0.02 | 0.00  | -0.01 | 0.21  | -0.02 | 0.06  | 0.01  | 0.00  | 0.00  |
| 19   | 1  | -0.01 | 0.00  | 0.00  | 0.12  | -0.03 | -0.06 | 0.00  | 0.00  | -0.01 |
| 20   | 6  | -0.01 | -0.01 | 0.00  | 0.15  | 0.04  | -0.07 | 0.00  | -0.02 | -0.03 |
| 21   | 1  | -0.02 | -0.02 | 0.00  | 0.24  | 0.07  | -0.14 | -0.01 | -0.06 | -0.04 |
| 22   | 6  | 0.00  | 0.00  | -0.01 | -0.04 | -0.06 | 0.04  | -0.01 | -0.01 | -0.02 |
| 23   | 1  | 0.02  | -0.01 | 0.03  | 0.00  | 0.19  | -0.13 | 0.03  | 0.01  | 0.05  |
| 24   | 1  | -0.03 | 0.03  | -0.03 | 0.06  | 0.12  | -0.13 | -0.07 | 0.08  | -0.08 |
| 25   | 1  | -0.01 | 0.01  | 0.01  | 0.22  | -0.15 | 0.25  | 0.01  | 0.01  | 0.05  |
| 26   | 6  | -0.02 | 0.01  | -0.01 | -0.03 | -0.01 | 0.01  | -0.02 | 0.04  | -0.01 |
| 27   | 1  | -0.07 | 0.05  | 0.00  | -0.04 | 0.05  | -0.01 | -0.09 | 0.09  | 0.00  |
| 28   | 1  | -0.03 | 0.05  | 0.01  | -0.03 | -0.05 | -0.01 | -0.06 | 0.10  | 0.00  |
| 29   | 6  | 0.01  | 0.00  | 0.01  | -0.05 | -0.02 | -0.12 | 0.02  | -0.01 | -0.02 |
| 30   | 1  | -0.01 | -0.03 | 0.01  | 0.12  | 0.32  | -0.14 | -0.02 | 0.00  | 0.01  |
| 31   | 1  | -0.01 | 0.03  | -0.02 | 0.06  | -0.21 | 0.23  | -0.01 | 0.03  | -0.01 |
| 32   | 6  | 0.00  | 0.00  | 0.01  | 0.00  | 0.01  | 0.01  | 0.00  | -0.01 | 0.03  |
| 33   | 1  | -0.01 | 0.00  | 0.00  | -0.02 | 0.19  | 0.03  | -0.09 | 0.10  | -0.03 |
| 34   | 6  | 0.00  | 0.00  | 0.00  | -0.02 | 0.02  | -0.04 | -0.01 | 0.01  | -0.02 |
| 35   | 1  | 0.01  | 0.00  | -0.01 | 0.17  | -0.14 | 0.11  | 0.14  | -0.07 | 0.04  |
| 36   | 6  | 0.02  | 0.00  | 0.02  | -0.02 | 0.01  | -0.02 | 0.04  | -0.02 | 0.04  |
| 37   | 1  | -0.02 | 0.00  | -0.01 | 0.04  | 0.00  | 0.03  | -0.05 | 0.01  | -0.05 |
| 38   | 1  | -0.03 | 0.01  | -0.01 | 0.03  | -0.01 | 0.00  | -0.04 | 0.02  | 0.05  |
| 39   | 1  | 0.01  | -0.01 | 0.09  | -0.01 | 0.01  | -0.11 | 0.02  | 0.00  | 0.18  |
| 40   | 6  | 0.02  | -0.02 | 0.00  | 0.03  | -0.01 | -0.02 | 0.03  | -0.04 | 0.01  |
| 41   | 1  | 0.07  | 0.02  | -0.03 | 0.01  | -0.07 | 0.04  | 0.08  | 0.01  | -0.03 |
| 42   | 6  | 0.05  | -0.01 | 0.02  | -0.01 | -0.01 | 0.00  | 0.02  | -0.02 | 0.00  |
| 43   | 1  | -0.11 | -0.03 | 0.18  | 0.01  | 0.04  | -0.05 | -0.04 | 0.02  | 0.04  |
| 44   | 1  | -0.11 | -0.02 | 0.03  | 0.00  | -0.01 | 0.07  | -0.06 | -0.02 | 0.07  |

|    |   |       |       |       |       |       |       |       |       |       |
|----|---|-------|-------|-------|-------|-------|-------|-------|-------|-------|
| 45 | 1 | 0.00  | 0.07  | -0.26 | 0.01  | 0.03  | 0.02  | 0.01  | 0.05  | -0.12 |
| 46 | 6 | 0.06  | 0.01  | 0.06  | 0.01  | 0.02  | -0.02 | -0.02 | 0.02  | 0.00  |
| 47 | 1 | 0.10  | -0.02 | 0.08  | -0.01 | 0.04  | -0.04 | -0.11 | 0.02  | 0.07  |
| 48 | 6 | -0.01 | -0.02 | -0.04 | -0.01 | -0.02 | 0.03  | 0.04  | -0.01 | -0.03 |
| 49 | 1 | 0.01  | -0.06 | 0.00  | 0.00  | 0.10  | -0.01 | 0.06  | -0.12 | 0.04  |
| 50 | 1 | -0.06 | 0.04  | 0.01  | 0.05  | -0.09 | -0.05 | -0.06 | 0.06  | 0.04  |
| 51 | 6 | -0.13 | 0.02  | -0.08 | 0.01  | 0.03  | -0.02 | 0.00  | -0.01 | 0.05  |
| 52 | 1 | -0.18 | 0.01  | -0.10 | 0.02  | -0.04 | -0.07 | 0.00  | 0.05  | 0.09  |
| 53 | 6 | 0.06  | 0.22  | 0.01  | 0.00  | 0.02  | 0.00  | -0.01 | -0.04 | 0.00  |
| 54 | 1 | 0.38  | 0.36  | 0.30  | 0.02  | 0.02  | 0.02  | -0.10 | -0.08 | -0.10 |
| 55 | 6 | -0.06 | -0.04 | -0.05 | -0.01 | 0.00  | -0.01 | 0.02  | 0.02  | 0.01  |
| 56 | 1 | -0.02 | -0.19 | 0.02  | 0.00  | -0.01 | 0.00  | 0.01  | 0.03  | 0.01  |
| 57 | 6 | 0.01  | -0.19 | 0.05  | 0.00  | -0.02 | 0.00  | 0.00  | 0.04  | -0.01 |
| 58 | 1 | 0.25  | -0.26 | 0.29  | 0.03  | -0.03 | 0.04  | -0.06 | 0.05  | -0.08 |
| 59 | 8 | 0.00  | 0.00  | 0.00  | -0.01 | 0.00  | 0.00  | 0.00  | 0.00  | -0.02 |
| 60 | 8 | 0.00  | 0.00  | 0.00  | 0.00  | 0.02  | -0.03 | 0.01  | 0.03  | 0.00  |
| 61 | 8 | 0.00  | 0.01  | -0.01 | -0.01 | -0.02 | 0.01  | 0.01  | 0.00  | 0.01  |
| 62 | 6 | 0.00  | -0.01 | 0.00  | 0.00  | -0.01 | 0.01  | -0.03 | -0.07 | 0.02  |
| 63 | 6 | 0.01  | 0.00  | -0.01 | 0.00  | 0.00  | 0.01  | 0.05  | -0.04 | -0.11 |
| 64 | 6 | 0.00  | 0.00  | 0.00  | -0.01 | -0.01 | 0.01  | 0.05  | 0.03  | -0.06 |
| 65 | 8 | 0.00  | 0.00  | 0.00  | 0.00  | 0.00  | 0.00  | 0.00  | 0.02  | 0.03  |
| 66 | 1 | 0.02  | 0.04  | 0.00  | -0.03 | -0.03 | 0.00  | 0.23  | 0.38  | -0.04 |
| 67 | 6 | 0.00  | 0.00  | 0.00  | 0.00  | 0.00  | -0.01 | -0.04 | -0.04 | 0.06  |
| 68 | 1 | 0.01  | 0.03  | 0.00  | -0.01 | -0.03 | 0.00  | 0.09  | 0.37  | 0.04  |
| 69 | 1 | 0.00  | -0.01 | -0.02 | 0.00  | 0.00  | 0.02  | 0.05  | -0.06 | -0.21 |
| 70 | 1 | 0.01  | -0.03 | -0.02 | 0.00  | 0.03  | 0.02  | 0.06  | -0.28 | -0.22 |
| 71 | 6 | 0.00  | 0.00  | 0.01  | 0.00  | 0.01  | -0.01 | -0.06 | 0.01  | 0.08  |
| 72 | 1 | 0.01  | -0.01 | -0.01 | 0.02  | -0.02 | -0.01 | -0.06 | 0.01  | 0.04  |
| 73 | 1 | -0.01 | -0.01 | 0.01  | 0.02  | -0.02 | -0.02 | -0.12 | 0.01  | 0.12  |
| 74 | 1 | -0.02 | 0.00  | 0.02  | -0.02 | 0.00  | 0.03  | -0.10 | 0.00  | 0.07  |

100

101

102

A

A

A

|                |           |           |           |
|----------------|-----------|-----------|-----------|
| Frequencies -- | 1026.2442 | 1027.1407 | 1029.0608 |
| Red. masses -- | 1.5050    | 1.8205    | 2.3665    |
| Frc consts --  | 0.9339    | 1.1316    | 1.4765    |
| IR Inten --    | 1.0907    | 1.7797    | 58.5748   |
| Raman Activ -- | 0.9060    | 5.2890    | 2.0131    |
| Depolar (P) -- | 0.7473    | 0.6319    | 0.5543    |
| Depolar (U) -- | 0.8554    | 0.7744    | 0.7132    |

| Atom | AN | X     | Y     | Z     | X     | Y     | Z     | X     | Y     | Z     |
|------|----|-------|-------|-------|-------|-------|-------|-------|-------|-------|
| 1    | 6  | 0.00  | 0.00  | -0.01 | -0.02 | 0.02  | -0.02 | -0.02 | 0.01  | -0.02 |
| 2    | 6  | 0.00  | 0.00  | -0.01 | -0.01 | 0.00  | 0.00  | 0.01  | -0.01 | -0.01 |
| 3    | 6  | -0.01 | -0.04 | -0.01 | 0.00  | -0.07 | -0.01 | 0.03  | 0.02  | -0.05 |
| 4    | 6  | 0.00  | 0.00  | 0.02  | 0.00  | 0.00  | 0.04  | 0.00  | 0.00  | 0.07  |
| 5    | 6  | 0.02  | 0.01  | 0.01  | 0.05  | 0.02  | 0.01  | 0.06  | 0.01  | 0.02  |
| 6    | 6  | 0.00  | 0.00  | -0.01 | 0.00  | 0.01  | -0.01 | -0.01 | 0.03  | -0.01 |
| 7    | 8  | 0.00  | 0.00  | 0.00  | 0.00  | 0.00  | 0.00  | 0.00  | 0.00  | 0.00  |
| 8    | 6  | 0.00  | -0.01 | -0.01 | -0.01 | -0.01 | 0.01  | 0.00  | 0.01  | -0.01 |
| 9    | 6  | -0.01 | -0.02 | 0.01  | -0.01 | -0.03 | 0.01  | -0.04 | -0.05 | 0.04  |
| 10   | 1  | -0.01 | 0.02  | 0.02  | 0.00  | -0.02 | 0.01  | -0.04 | 0.04  | 0.04  |
| 11   | 8  | 0.01  | 0.01  | -0.02 | 0.01  | 0.01  | -0.01 | 0.03  | 0.02  | -0.05 |
| 12   | 6  | 0.00  | 0.00  | -0.01 | -0.02 | 0.01  | 0.00  | 0.00  | -0.02 | -0.03 |

|    |   |       |       |       |       |       |       |       |       |       |
|----|---|-------|-------|-------|-------|-------|-------|-------|-------|-------|
| 13 | 1 | 0.02  | 0.01  | -0.01 | 0.00  | 0.04  | -0.03 | 0.10  | 0.02  | -0.06 |
| 14 | 6 | -0.02 | -0.01 | 0.00  | -0.03 | -0.01 | 0.00  | 0.02  | 0.02  | 0.02  |
| 15 | 8 | 0.00  | 0.01  | 0.00  | 0.00  | 0.02  | -0.01 | 0.01  | -0.01 | 0.01  |
| 16 | 6 | 0.00  | 0.00  | -0.01 | -0.01 | 0.01  | 0.01  | 0.01  | 0.00  | -0.01 |
| 17 | 1 | 0.01  | 0.00  | 0.01  | -0.03 | -0.01 | -0.03 | 0.05  | -0.01 | 0.05  |
| 18 | 1 | -0.03 | 0.00  | -0.01 | 0.06  | -0.01 | 0.03  | -0.05 | 0.00  | -0.01 |
| 19 | 1 | -0.01 | 0.00  | 0.00  | 0.00  | -0.01 | -0.03 | -0.02 | 0.00  | 0.02  |
| 20 | 6 | -0.01 | -0.01 | 0.01  | 0.04  | 0.00  | -0.01 | -0.02 | 0.01  | 0.01  |
| 21 | 1 | 0.01  | 0.01  | 0.01  | 0.08  | 0.04  | -0.03 | -0.02 | 0.07  | 0.03  |
| 22 | 6 | 0.01  | 0.02  | 0.01  | 0.00  | 0.01  | 0.03  | 0.00  | 0.00  | 0.02  |
| 23 | 1 | -0.03 | -0.05 | -0.02 | -0.04 | 0.01  | -0.07 | -0.01 | 0.01  | -0.04 |
| 24 | 1 | 0.04  | -0.09 | 0.09  | 0.07  | -0.07 | 0.07  | 0.04  | -0.03 | 0.03  |
| 25 | 1 | -0.05 | 0.02  | -0.09 | 0.02  | -0.03 | -0.02 | 0.02  | -0.02 | 0.01  |
| 26 | 6 | 0.04  | -0.03 | -0.01 | 0.04  | -0.05 | 0.00  | -0.04 | 0.01  | 0.01  |
| 27 | 1 | 0.11  | -0.14 | 0.01  | 0.14  | -0.17 | 0.00  | -0.06 | 0.09  | -0.02 |
| 28 | 1 | 0.05  | -0.02 | 0.01  | 0.05  | -0.06 | 0.00  | -0.03 | -0.07 | -0.01 |
| 29 | 6 | -0.01 | 0.01  | 0.01  | -0.02 | 0.00  | -0.01 | -0.02 | 0.01  | 0.04  |
| 30 | 1 | 0.01  | 0.02  | 0.00  | 0.03  | 0.05  | -0.03 | 0.00  | -0.03 | 0.01  |
| 31 | 1 | 0.00  | -0.02 | 0.02  | 0.03  | -0.10 | 0.03  | 0.00  | -0.04 | -0.02 |
| 32 | 6 | 0.07  | -0.06 | 0.05  | -0.05 | 0.04  | -0.04 | 0.03  | -0.02 | 0.01  |
| 33 | 1 | -0.41 | 0.32  | -0.30 | 0.28  | -0.21 | 0.19  | -0.12 | 0.06  | -0.10 |
| 34 | 6 | -0.07 | 0.06  | -0.04 | 0.04  | -0.04 | 0.03  | -0.03 | 0.02  | 0.00  |
| 35 | 1 | 0.45  | -0.31 | 0.30  | -0.30 | 0.19  | -0.17 | 0.10  | -0.08 | 0.09  |
| 36 | 6 | -0.01 | 0.01  | 0.00  | -0.02 | 0.01  | -0.01 | -0.03 | 0.00  | -0.03 |
| 37 | 1 | 0.02  | -0.01 | 0.03  | 0.04  | 0.00  | 0.03  | 0.04  | 0.01  | -0.01 |
| 38 | 1 | 0.02  | -0.01 | -0.01 | 0.03  | -0.01 | 0.01  | 0.05  | -0.01 | 0.02  |
| 39 | 1 | -0.01 | 0.00  | -0.05 | -0.01 | 0.01  | -0.11 | -0.02 | 0.03  | -0.15 |
| 40 | 6 | -0.05 | 0.04  | 0.01  | -0.06 | 0.05  | 0.00  | 0.07  | -0.02 | -0.01 |
| 41 | 1 | -0.10 | 0.01  | 0.02  | -0.12 | -0.01 | 0.05  | 0.10  | -0.02 | -0.01 |
| 42 | 6 | -0.01 | 0.03  | 0.02  | -0.02 | 0.03  | 0.02  | -0.03 | -0.06 | -0.01 |
| 43 | 1 | 0.00  | -0.08 | 0.06  | 0.03  | -0.07 | 0.03  | 0.06  | 0.15  | -0.21 |
| 44 | 1 | 0.04  | 0.02  | -0.16 | 0.06  | 0.03  | -0.16 | 0.01  | -0.03 | 0.28  |
| 45 | 1 | -0.02 | -0.08 | 0.06  | -0.03 | -0.10 | 0.13  | 0.04  | 0.10  | 0.08  |
| 46 | 6 | -0.02 | -0.01 | -0.01 | -0.02 | -0.01 | -0.03 | 0.08  | 0.02  | -0.01 |
| 47 | 1 | -0.04 | -0.03 | 0.02  | -0.06 | -0.03 | 0.02  | 0.09  | 0.04  | -0.05 |
| 48 | 6 | 0.01  | 0.05  | 0.01  | -0.01 | 0.06  | 0.03  | -0.08 | -0.11 | 0.03  |
| 49 | 1 | 0.06  | 0.08  | 0.07  | 0.07  | 0.17  | 0.08  | -0.17 | 0.10  | -0.17 |
| 50 | 1 | 0.03  | 0.07  | 0.04  | 0.07  | 0.04  | 0.02  | 0.02  | -0.31 | -0.19 |
| 51 | 6 | 0.00  | -0.06 | -0.03 | 0.01  | -0.06 | -0.05 | 0.01  | 0.16  | -0.01 |
| 52 | 1 | 0.01  | -0.06 | -0.03 | 0.04  | -0.11 | -0.08 | 0.03  | 0.02  | -0.11 |
| 53 | 6 | 0.01  | 0.01  | 0.00  | 0.01  | 0.02  | 0.00  | 0.00  | 0.01  | -0.01 |
| 54 | 1 | 0.10  | 0.05  | 0.10  | 0.14  | 0.07  | 0.14  | -0.10 | -0.03 | -0.10 |
| 55 | 6 | -0.01 | -0.02 | 0.00  | -0.01 | -0.02 | -0.01 | 0.00  | 0.02  | 0.00  |
| 56 | 1 | -0.01 | -0.02 | 0.00  | -0.01 | -0.03 | -0.01 | 0.00  | 0.02  | 0.00  |
| 57 | 6 | 0.01  | 0.00  | 0.00  | 0.01  | -0.01 | 0.01  | -0.01 | -0.05 | 0.00  |
| 58 | 1 | 0.04  | -0.01 | 0.04  | 0.06  | -0.02 | 0.07  | 0.00  | -0.05 | 0.00  |
| 59 | 8 | 0.01  | 0.01  | -0.01 | 0.00  | 0.01  | -0.01 | -0.01 | -0.01 | 0.02  |
| 60 | 8 | 0.00  | 0.00  | 0.00  | 0.00  | 0.01  | -0.01 | 0.00  | -0.02 | 0.01  |
| 61 | 8 | 0.00  | 0.00  | 0.00  | 0.00  | 0.00  | 0.01  | -0.02 | -0.01 | 0.01  |
| 62 | 6 | 0.00  | 0.00  | 0.00  | -0.01 | 0.01  | 0.01  | 0.00  | 0.06  | 0.00  |
| 63 | 6 | 0.00  | 0.00  | -0.01 | 0.03  | -0.02 | -0.07 | 0.01  | 0.00  | -0.06 |
| 64 | 6 | 0.01  | 0.00  | -0.01 | 0.03  | 0.03  | -0.05 | 0.02  | 0.03  | -0.04 |

|    |   |       |       |       |       |       |       |       |       |       |
|----|---|-------|-------|-------|-------|-------|-------|-------|-------|-------|
| 65 | 8 | 0.00  | 0.00  | 0.00  | 0.00  | 0.00  | 0.02  | 0.00  | 0.00  | 0.02  |
| 66 | 1 | 0.03  | 0.04  | 0.00  | 0.18  | 0.23  | 0.00  | 0.18  | 0.15  | 0.03  |
| 67 | 6 | 0.00  | -0.01 | 0.01  | -0.02 | -0.03 | 0.04  | -0.01 | -0.03 | 0.03  |
| 68 | 1 | 0.01  | 0.04  | 0.00  | 0.04  | 0.22  | 0.02  | 0.02  | 0.13  | 0.00  |
| 69 | 1 | 0.01  | 0.00  | -0.02 | 0.03  | -0.01 | -0.13 | 0.02  | 0.01  | -0.09 |
| 70 | 1 | 0.00  | -0.03 | -0.03 | 0.03  | -0.19 | -0.15 | 0.00  | -0.15 | -0.11 |
| 71 | 6 | -0.01 | -0.01 | 0.01  | -0.04 | -0.03 | 0.06  | -0.02 | -0.06 | 0.06  |
| 72 | 1 | -0.02 | 0.02  | 0.02  | -0.13 | 0.08  | 0.09  | -0.17 | 0.14  | 0.10  |
| 73 | 1 | -0.02 | 0.02  | 0.02  | -0.11 | 0.09  | 0.12  | -0.12 | 0.15  | 0.14  |
| 74 | 1 | 0.02  | 0.00  | -0.02 | 0.06  | 0.01  | -0.09 | 0.16  | 0.01  | -0.22 |

103                      104                      105  
A                      A                      A

|                |           |           |           |
|----------------|-----------|-----------|-----------|
| Frequencies -- | 1045.0527 | 1045.5983 | 1050.9373 |
| Red. masses -- | 2.7874    | 2.2838    | 2.0863    |
| Frc consts --  | 1.7936    | 1.4711    | 1.3576    |
| IR Inten --    | 43.4684   | 69.2901   | 13.3402   |
| Raman Activ -- | 0.5179    | 6.6190    | 0.7713    |
| Depolar (P) -- | 0.7409    | 0.2096    | 0.1328    |
| Depolar (U) -- | 0.8512    | 0.3466    | 0.2345    |

| Atom | AN | X     | Y     | Z     | X     | Y     | Z     | X     | Y     | Z     |
|------|----|-------|-------|-------|-------|-------|-------|-------|-------|-------|
| 1    | 6  | 0.09  | -0.05 | 0.08  | 0.01  | -0.01 | 0.00  | 0.05  | -0.02 | 0.04  |
| 2    | 6  | -0.02 | 0.01  | -0.05 | -0.01 | 0.01  | -0.01 | -0.02 | 0.01  | 0.00  |
| 3    | 6  | -0.05 | 0.06  | -0.08 | -0.06 | -0.06 | 0.01  | -0.06 | -0.02 | -0.02 |
| 4    | 6  | -0.01 | 0.01  | 0.02  | -0.01 | -0.01 | -0.01 | 0.02  | 0.02  | 0.03  |
| 5    | 6  | 0.10  | -0.04 | 0.05  | 0.04  | -0.01 | 0.01  | -0.03 | 0.01  | 0.00  |
| 6    | 6  | 0.00  | 0.02  | 0.02  | 0.00  | 0.02  | -0.06 | 0.00  | -0.02 | 0.00  |
| 7    | 8  | 0.00  | 0.00  | 0.01  | 0.00  | 0.00  | 0.00  | 0.00  | 0.00  | 0.00  |
| 8    | 6  | 0.00  | 0.03  | -0.03 | 0.01  | -0.01 | 0.01  | 0.00  | 0.00  | 0.00  |
| 9    | 6  | 0.08  | 0.12  | -0.08 | 0.03  | 0.02  | -0.01 | 0.04  | 0.09  | -0.07 |
| 10   | 1  | 0.10  | 0.01  | -0.10 | 0.03  | -0.01 | -0.01 | 0.07  | 0.00  | -0.09 |
| 11   | 8  | -0.06 | -0.05 | 0.08  | -0.01 | 0.00  | 0.02  | -0.04 | -0.04 | 0.06  |
| 12   | 6  | 0.01  | -0.06 | 0.03  | -0.01 | 0.01  | 0.01  | 0.01  | -0.04 | 0.06  |
| 13   | 1  | -0.13 | -0.09 | 0.05  | -0.09 | -0.01 | 0.02  | -0.03 | -0.03 | 0.04  |
| 14   | 6  | -0.03 | 0.00  | 0.00  | 0.03  | 0.01  | 0.02  | 0.02  | 0.00  | 0.01  |
| 15   | 8  | 0.00  | 0.04  | -0.01 | 0.01  | -0.03 | 0.02  | 0.00  | -0.02 | 0.01  |
| 16   | 6  | 0.00  | -0.01 | 0.01  | -0.01 | 0.01  | 0.00  | -0.01 | 0.00  | 0.00  |
| 17   | 1  | -0.03 | 0.02  | -0.03 | -0.01 | -0.01 | -0.01 | -0.03 | 0.01  | -0.03 |
| 18   | 1  | 0.02  | 0.02  | -0.01 | 0.02  | -0.01 | 0.01  | 0.02  | 0.01  | 0.00  |
| 19   | 1  | 0.06  | 0.00  | 0.02  | -0.02 | 0.00  | -0.02 | 0.02  | 0.00  | 0.00  |
| 20   | 6  | -0.07 | -0.02 | 0.03  | 0.00  | -0.03 | 0.00  | -0.01 | -0.01 | 0.02  |
| 21   | 1  | -0.20 | -0.20 | 0.08  | 0.01  | -0.05 | -0.01 | -0.05 | -0.11 | 0.02  |
| 22   | 6  | -0.03 | 0.02  | -0.05 | 0.03  | 0.03  | -0.01 | 0.00  | 0.02  | -0.03 |
| 23   | 1  | -0.01 | 0.02  | -0.01 | -0.01 | -0.10 | 0.05  | 0.01  | -0.03 | 0.04  |
| 24   | 1  | -0.05 | 0.05  | -0.07 | 0.00  | -0.09 | 0.10  | -0.04 | 0.02  | -0.02 |
| 25   | 1  | -0.03 | 0.04  | -0.02 | -0.10 | 0.06  | -0.13 | -0.05 | 0.04  | -0.04 |
| 26   | 6  | -0.03 | 0.02  | 0.03  | 0.09  | -0.05 | -0.02 | 0.06  | -0.02 | -0.03 |
| 27   | 1  | -0.05 | 0.16  | -0.03 | 0.27  | -0.31 | 0.01  | 0.11  | -0.18 | 0.03  |
| 28   | 1  | -0.04 | -0.08 | -0.02 | 0.10  | -0.01 | 0.00  | 0.13  | 0.01  | 0.02  |
| 29   | 6  | 0.08  | -0.04 | -0.03 | 0.01  | 0.00  | -0.02 | 0.04  | -0.02 | -0.04 |
| 30   | 1  | -0.10 | -0.12 | 0.09  | -0.01 | 0.01  | 0.00  | -0.03 | -0.01 | 0.02  |
| 31   | 1  | -0.06 | 0.25  | -0.09 | 0.00  | 0.03  | -0.01 | -0.03 | 0.13  | 0.00  |
| 32   | 6  | 0.00  | -0.01 | 0.01  | -0.01 | 0.00  | 0.00  | 0.00  | 0.00  | 0.00  |



|    |   |       |       |       |       |       |       |       |       |       |
|----|---|-------|-------|-------|-------|-------|-------|-------|-------|-------|
| 33 | 1 | -0.08 | -0.05 | -0.07 | 0.01  | -0.02 | 0.01  | -0.01 | 0.02  | 0.00  |
| 34 | 6 | 0.00  | 0.00  | 0.02  | 0.00  | 0.00  | 0.00  | 0.01  | 0.00  | 0.00  |
| 35 | 1 | 0.03  | 0.06  | -0.03 | -0.01 | 0.01  | -0.01 | 0.02  | 0.01  | -0.01 |
| 36 | 6 | -0.04 | 0.03  | 0.01  | 0.00  | 0.02  | 0.01  | 0.01  | 0.01  | -0.02 |
| 37 | 1 | 0.10  | -0.02 | 0.16  | 0.02  | -0.04 | 0.11  | -0.02 | -0.02 | 0.01  |
| 38 | 1 | 0.05  | -0.05 | -0.06 | 0.00  | -0.02 | -0.07 | -0.05 | 0.01  | -0.10 |
| 39 | 1 | -0.02 | -0.02 | -0.22 | -0.01 | -0.04 | -0.03 | 0.00  | -0.02 | 0.05  |
| 40 | 6 | 0.04  | -0.01 | -0.03 | -0.10 | 0.05  | 0.02  | -0.08 | 0.04  | 0.01  |
| 41 | 1 | 0.10  | 0.07  | -0.10 | -0.15 | 0.02  | 0.03  | -0.14 | -0.01 | 0.04  |
| 42 | 6 | -0.06 | -0.01 | -0.03 | -0.01 | -0.01 | 0.04  | 0.02  | 0.01  | 0.01  |
| 43 | 1 | 0.14  | 0.09  | -0.27 | -0.02 | -0.02 | 0.05  | -0.05 | -0.06 | 0.12  |
| 44 | 1 | 0.12  | 0.01  | 0.08  | -0.02 | -0.01 | 0.02  | -0.02 | 0.00  | -0.07 |
| 45 | 1 | 0.02  | -0.01 | 0.25  | -0.01 | -0.01 | 0.01  | -0.01 | -0.01 | -0.09 |
| 46 | 6 | 0.01  | -0.05 | -0.02 | 0.07  | 0.02  | 0.00  | 0.01  | 0.01  | 0.03  |
| 47 | 1 | 0.02  | -0.10 | 0.04  | -0.06 | 0.02  | 0.12  | 0.14  | 0.03  | -0.12 |
| 48 | 6 | -0.05 | 0.04  | 0.04  | -0.06 | -0.08 | 0.01  | 0.01  | -0.04 | -0.02 |
| 49 | 1 | -0.04 | 0.18  | -0.01 | -0.08 | 0.08  | -0.08 | -0.07 | -0.14 | -0.07 |
| 50 | 1 | 0.07  | -0.03 | -0.03 | -0.05 | -0.24 | -0.17 | -0.02 | 0.01  | 0.02  |
| 51 | 6 | 0.04  | -0.04 | -0.04 | -0.02 | 0.14  | 0.01  | -0.03 | 0.04  | 0.02  |
| 52 | 1 | 0.05  | -0.10 | -0.09 | 0.02  | 0.01  | -0.09 | -0.08 | 0.10  | 0.05  |
| 53 | 6 | 0.01  | -0.01 | 0.00  | 0.00  | 0.02  | -0.01 | 0.00  | 0.01  | 0.00  |
| 54 | 1 | 0.18  | 0.06  | 0.18  | -0.18 | -0.04 | -0.17 | -0.12 | -0.03 | -0.11 |
| 55 | 6 | -0.02 | -0.05 | -0.01 | 0.02  | 0.05  | 0.01  | 0.01  | 0.03  | 0.01  |
| 56 | 1 | -0.03 | -0.01 | -0.03 | 0.02  | 0.04  | 0.01  | 0.02  | 0.01  | 0.02  |
| 57 | 6 | 0.01  | 0.01  | 0.01  | -0.02 | -0.06 | -0.01 | -0.01 | -0.02 | -0.01 |
| 58 | 1 | 0.08  | 0.00  | 0.10  | -0.06 | -0.05 | -0.06 | -0.05 | -0.01 | -0.05 |
| 59 | 8 | 0.00  | -0.03 | 0.05  | 0.02  | 0.02  | -0.03 | 0.02  | 0.00  | 0.00  |
| 60 | 8 | 0.00  | 0.03  | -0.04 | 0.01  | 0.05  | -0.02 | -0.02 | -0.01 | -0.03 |
| 61 | 8 | -0.01 | 0.03  | -0.01 | -0.02 | -0.01 | 0.01  | 0.00  | 0.00  | -0.01 |
| 62 | 6 | -0.01 | -0.02 | 0.01  | -0.03 | -0.08 | 0.01  | 0.03  | 0.04  | 0.01  |
| 63 | 6 | 0.03  | -0.02 | -0.01 | 0.04  | -0.04 | 0.01  | -0.05 | 0.05  | -0.03 |
| 64 | 6 | 0.01  | 0.00  | -0.01 | 0.01  | -0.03 | 0.00  | -0.02 | 0.03  | -0.01 |
| 65 | 8 | 0.00  | 0.00  | 0.01  | 0.00  | 0.01  | 0.00  | -0.01 | -0.01 | 0.00  |
| 66 | 1 | 0.00  | 0.08  | -0.04 | -0.10 | 0.07  | -0.11 | 0.15  | -0.10 | 0.15  |
| 67 | 6 | -0.01 | 0.00  | 0.01  | -0.02 | 0.02  | 0.01  | 0.02  | -0.03 | 0.00  |
| 68 | 1 | 0.03  | 0.07  | 0.02  | 0.05  | 0.08  | 0.05  | -0.07 | -0.06 | -0.06 |
| 69 | 1 | 0.01  | -0.03 | -0.04 | 0.01  | -0.07 | -0.03 | 0.00  | 0.11  | 0.03  |
| 70 | 1 | 0.03  | -0.03 | -0.03 | 0.05  | 0.04  | 0.01  | -0.07 | -0.07 | -0.03 |
| 71 | 6 | -0.04 | 0.01  | -0.01 | -0.04 | 0.07  | -0.03 | 0.07  | -0.07 | 0.05  |
| 72 | 1 | -0.02 | -0.02 | 0.10  | 0.11  | -0.14 | 0.06  | -0.08 | 0.15  | -0.18 |
| 73 | 1 | 0.10  | -0.03 | -0.08 | 0.21  | -0.17 | -0.20 | -0.33 | 0.18  | 0.29  |
| 74 | 1 | -0.03 | 0.01  | 0.12  | -0.20 | 0.00  | 0.36  | 0.16  | -0.02 | -0.43 |

106

107

108

A

A

A

|                |           |           |           |
|----------------|-----------|-----------|-----------|
| Frequencies -- | 1060.6178 | 1062.4082 | 1068.3452 |
| Red. masses -- | 1.8456    | 2.7314    | 1.6608    |
| Frc consts --  | 1.2232    | 1.8164    | 1.1168    |
| IR Inten --    | 15.5462   | 31.4240   | 9.8016    |
| Raman Activ -- | 5.6762    | 7.1529    | 1.8104    |
| Depolar (P) -- | 0.7462    | 0.2845    | 0.7489    |
| Depolar (U) -- | 0.8547    | 0.4430    | 0.8564    |
| Atom AN        | X Y Z     | X Y Z     | X Y Z     |

|    |   |       |       |       |       |       |       |       |       |       |
|----|---|-------|-------|-------|-------|-------|-------|-------|-------|-------|
| 1  | 6 | 0.01  | 0.00  | 0.00  | 0.01  | 0.00  | 0.01  | 0.00  | 0.00  | 0.01  |
| 2  | 6 | 0.00  | 0.00  | 0.00  | 0.00  | 0.00  | 0.00  | 0.00  | 0.00  | 0.01  |
| 3  | 6 | 0.01  | 0.00  | -0.03 | 0.00  | 0.02  | -0.01 | 0.00  | 0.00  | 0.00  |
| 4  | 6 | 0.03  | 0.01  | 0.10  | 0.00  | 0.00  | -0.02 | 0.00  | 0.00  | -0.02 |
| 5  | 6 | -0.05 | 0.04  | -0.01 | 0.03  | -0.02 | 0.01  | 0.00  | -0.01 | 0.00  |
| 6  | 6 | 0.00  | -0.02 | 0.03  | -0.01 | 0.01  | 0.00  | 0.00  | 0.00  | 0.00  |
| 7  | 8 | 0.00  | -0.01 | 0.00  | 0.00  | 0.00  | 0.00  | 0.00  | 0.00  | 0.00  |
| 8  | 6 | 0.00  | 0.00  | 0.00  | 0.00  | 0.00  | -0.01 | 0.00  | 0.00  | 0.00  |
| 9  | 6 | -0.03 | 0.01  | -0.02 | 0.00  | 0.00  | 0.00  | 0.01  | 0.01  | 0.00  |
| 10 | 1 | -0.01 | 0.02  | -0.03 | 0.00  | 0.00  | 0.00  | 0.01  | -0.01 | 0.00  |
| 11 | 8 | 0.00  | -0.01 | 0.00  | 0.00  | 0.00  | 0.00  | 0.00  | 0.00  | 0.01  |
| 12 | 6 | 0.02  | -0.06 | 0.07  | 0.00  | 0.01  | -0.02 | -0.01 | 0.01  | -0.01 |
| 13 | 1 | 0.13  | -0.01 | 0.02  | -0.02 | -0.01 | 0.00  | -0.03 | 0.00  | -0.01 |
| 14 | 6 | 0.00  | 0.00  | 0.00  | -0.01 | -0.04 | 0.03  | 0.00  | 0.00  | 0.00  |
| 15 | 8 | 0.00  | -0.02 | 0.01  | 0.03  | -0.13 | 0.05  | 0.00  | 0.00  | 0.00  |
| 16 | 6 | 0.00  | -0.01 | 0.00  | 0.00  | 0.00  | 0.00  | 0.00  | 0.00  | 0.00  |
| 17 | 1 | 0.00  | 0.01  | 0.00  | -0.01 | 0.00  | -0.01 | 0.00  | 0.00  | 0.00  |
| 18 | 1 | -0.02 | 0.01  | -0.01 | 0.01  | 0.00  | 0.00  | 0.00  | 0.00  | 0.00  |
| 19 | 1 | 0.02  | 0.00  | 0.02  | 0.01  | 0.00  | 0.00  | 0.00  | 0.00  | 0.00  |
| 20 | 6 | 0.00  | 0.02  | 0.03  | 0.00  | 0.00  | 0.00  | 0.00  | 0.00  | -0.01 |
| 21 | 1 | -0.01 | 0.01  | 0.03  | -0.02 | -0.01 | 0.01  | 0.00  | -0.01 | -0.01 |
| 22 | 6 | -0.01 | -0.01 | 0.00  | -0.01 | 0.00  | 0.00  | 0.00  | 0.00  | 0.00  |
| 23 | 1 | 0.00  | 0.03  | -0.01 | 0.00  | 0.02  | -0.02 | 0.00  | 0.00  | 0.01  |
| 24 | 1 | 0.00  | 0.02  | -0.03 | 0.00  | 0.01  | -0.02 | -0.01 | 0.01  | -0.01 |
| 25 | 1 | 0.02  | -0.01 | 0.03  | 0.02  | -0.01 | 0.02  | 0.00  | 0.00  | 0.00  |
| 26 | 6 | 0.00  | 0.01  | -0.02 | -0.03 | 0.00  | 0.04  | 0.00  | 0.00  | 0.00  |
| 27 | 1 | -0.06 | 0.00  | 0.02  | -0.03 | 0.14  | -0.03 | 0.02  | -0.01 | 0.00  |
| 28 | 1 | 0.07  | 0.00  | 0.01  | -0.10 | -0.05 | -0.03 | 0.00  | 0.00  | 0.00  |
| 29 | 6 | 0.00  | 0.00  | 0.00  | 0.00  | 0.00  | 0.00  | 0.00  | 0.00  | 0.00  |
| 30 | 1 | 0.00  | -0.01 | -0.01 | 0.00  | -0.01 | 0.00  | 0.00  | 0.00  | 0.00  |
| 31 | 1 | -0.01 | 0.02  | 0.01  | 0.00  | 0.00  | -0.01 | 0.00  | 0.01  | 0.00  |
| 32 | 6 | 0.01  | 0.00  | -0.01 | 0.00  | 0.00  | 0.00  | 0.00  | 0.00  | 0.00  |
| 33 | 1 | -0.01 | 0.00  | -0.02 | -0.01 | -0.01 | -0.01 | 0.00  | 0.01  | 0.01  |
| 34 | 6 | 0.00  | 0.00  | 0.00  | 0.00  | 0.00  | 0.00  | 0.00  | 0.00  | 0.00  |
| 35 | 1 | -0.01 | -0.01 | 0.02  | 0.00  | 0.01  | -0.01 | 0.00  | 0.00  | -0.01 |
| 36 | 6 | 0.01  | 0.00  | -0.05 | -0.01 | 0.00  | 0.01  | 0.00  | 0.00  | 0.01  |
| 37 | 1 | -0.07 | 0.02  | -0.13 | 0.04  | 0.00  | 0.06  | 0.01  | 0.00  | 0.02  |
| 38 | 1 | -0.06 | 0.04  | -0.06 | 0.04  | -0.02 | 0.02  | 0.01  | 0.00  | 0.01  |
| 39 | 1 | 0.00  | 0.01  | 0.08  | 0.00  | 0.00  | -0.07 | 0.00  | 0.00  | -0.01 |
| 40 | 6 | -0.01 | 0.01  | 0.00  | 0.04  | -0.02 | -0.02 | 0.00  | 0.00  | 0.00  |
| 41 | 1 | -0.04 | -0.04 | 0.04  | 0.07  | 0.03  | -0.06 | -0.01 | 0.00  | 0.00  |
| 42 | 6 | 0.02  | 0.02  | -0.01 | -0.01 | 0.01  | 0.00  | 0.00  | 0.00  | 0.00  |
| 43 | 1 | -0.04 | -0.04 | 0.08  | 0.01  | -0.02 | 0.00  | 0.00  | 0.00  | 0.00  |
| 44 | 1 | -0.02 | 0.01  | -0.07 | 0.02  | 0.01  | -0.05 | 0.00  | 0.00  | 0.00  |
| 45 | 1 | 0.00  | 0.00  | -0.09 | -0.01 | -0.03 | 0.05  | 0.00  | 0.00  | 0.00  |
| 46 | 6 | -0.03 | 0.00  | 0.03  | -0.01 | -0.03 | -0.01 | 0.00  | 0.00  | 0.00  |
| 47 | 1 | 0.23  | 0.03  | -0.26 | -0.13 | -0.10 | 0.20  | -0.04 | -0.01 | 0.04  |
| 48 | 6 | 0.04  | -0.01 | -0.02 | 0.00  | 0.09  | 0.02  | 0.00  | 0.00  | 0.00  |
| 49 | 1 | -0.03 | -0.16 | -0.04 | 0.16  | 0.20  | 0.16  | 0.01  | 0.02  | 0.01  |
| 50 | 1 | 0.03  | 0.11  | 0.11  | 0.01  | 0.08  | 0.01  | -0.01 | -0.01 | -0.01 |
| 51 | 6 | -0.03 | -0.02 | 0.01  | -0.04 | -0.10 | -0.10 | 0.00  | 0.00  | 0.00  |
| 52 | 1 | -0.10 | 0.09  | 0.07  | -0.04 | -0.21 | -0.20 | 0.01  | -0.01 | -0.01 |

|    |   |       |       |       |       |       |       |       |       |       |
|----|---|-------|-------|-------|-------|-------|-------|-------|-------|-------|
| 53 | 6 | 0.00  | 0.02  | 0.00  | 0.02  | 0.13  | -0.01 | 0.00  | 0.00  | 0.00  |
| 54 | 1 | -0.09 | -0.01 | -0.09 | -0.42 | -0.02 | -0.40 | 0.00  | 0.00  | 0.00  |
| 55 | 6 | 0.02  | 0.03  | 0.01  | 0.09  | 0.20  | 0.06  | 0.00  | 0.00  | 0.00  |
| 56 | 1 | 0.03  | -0.01 | 0.03  | 0.14  | 0.05  | 0.13  | 0.00  | 0.00  | 0.00  |
| 57 | 6 | -0.01 | -0.01 | -0.01 | -0.06 | -0.10 | -0.05 | 0.00  | 0.00  | 0.00  |
| 58 | 1 | -0.05 | 0.00  | -0.04 | -0.28 | -0.06 | -0.26 | 0.00  | 0.00  | 0.00  |
| 59 | 8 | 0.00  | -0.01 | 0.01  | -0.01 | -0.01 | 0.02  | 0.00  | 0.00  | 0.00  |
| 60 | 8 | -0.01 | 0.00  | -0.05 | 0.00  | -0.02 | 0.02  | 0.00  | -0.02 | 0.02  |
| 61 | 8 | 0.01  | -0.01 | -0.02 | 0.01  | 0.03  | 0.00  | 0.00  | 0.00  | 0.00  |
| 62 | 6 | 0.00  | 0.07  | 0.01  | 0.00  | 0.01  | -0.01 | 0.01  | 0.01  | 0.00  |
| 63 | 6 | 0.07  | -0.02 | 0.01  | 0.00  | 0.01  | 0.01  | -0.04 | 0.03  | -0.05 |
| 64 | 6 | 0.05  | 0.02  | 0.00  | -0.01 | 0.01  | 0.00  | 0.13  | -0.05 | 0.09  |
| 65 | 8 | 0.00  | -0.02 | 0.02  | 0.00  | 0.00  | 0.00  | 0.00  | 0.00  | 0.00  |
| 66 | 1 | -0.07 | 0.19  | -0.13 | 0.01  | -0.02 | 0.02  | -0.26 | 0.19  | -0.25 |
| 67 | 6 | -0.03 | -0.02 | -0.01 | 0.00  | -0.01 | 0.00  | -0.11 | 0.05  | -0.08 |
| 68 | 1 | 0.06  | 0.04  | 0.04  | -0.02 | -0.03 | -0.01 | 0.23  | -0.07 | 0.21  |
| 69 | 1 | 0.00  | -0.13 | -0.07 | 0.00  | 0.02  | 0.01  | -0.05 | -0.56 | -0.09 |
| 70 | 1 | 0.06  | -0.01 | -0.01 | -0.02 | -0.01 | 0.00  | 0.27  | 0.37  | 0.20  |
| 71 | 6 | -0.11 | -0.03 | -0.04 | 0.01  | -0.01 | 0.00  | 0.02  | -0.03 | 0.03  |
| 72 | 1 | -0.20 | 0.04  | 0.45  | -0.01 | 0.02  | 0.00  | -0.05 | 0.07  | -0.04 |
| 73 | 1 | 0.38  | 0.03  | -0.26 | -0.02 | 0.02  | 0.02  | -0.15 | 0.08  | 0.13  |
| 74 | 1 | 0.16  | 0.07  | 0.16  | 0.03  | 0.00  | -0.05 | 0.07  | -0.01 | -0.18 |

109

110

111

A

A

A

|                |           |           |           |
|----------------|-----------|-----------|-----------|
| Frequencies -- | 1071.7177 | 1080.7072 | 1091.4985 |
| Red. masses -- | 2.2718    | 2.1672    | 1.8673    |
| Frc consts --  | 1.5374    | 1.4913    | 1.3107    |
| IR Inten --    | 123.1938  | 92.4087   | 28.1743   |
| Raman Activ -- | 6.7128    | 0.7097    | 1.6861    |
| Depolar (P) -- | 0.4011    | 0.2273    | 0.7442    |
| Depolar (U) -- | 0.5726    | 0.3704    | 0.8534    |

| Atom | AN | X     | Y     | Z     | X     | Y     | Z     | X     | Y     | Z     |
|------|----|-------|-------|-------|-------|-------|-------|-------|-------|-------|
| 1    | 6  | -0.01 | 0.00  | 0.02  | -0.06 | 0.03  | 0.00  | 0.03  | 0.00  | 0.02  |
| 2    | 6  | -0.03 | 0.01  | 0.07  | -0.05 | 0.01  | 0.14  | -0.01 | 0.00  | 0.02  |
| 3    | 6  | -0.02 | -0.01 | 0.01  | 0.04  | 0.00  | -0.06 | 0.00  | 0.00  | 0.00  |
| 4    | 6  | -0.01 | 0.02  | -0.12 | 0.01  | 0.01  | 0.01  | -0.01 | 0.01  | 0.00  |
| 5    | 6  | -0.01 | -0.05 | -0.01 | 0.02  | 0.00  | 0.01  | 0.00  | 0.01  | 0.00  |
| 6    | 6  | -0.01 | 0.02  | -0.03 | -0.01 | 0.00  | 0.02  | 0.01  | -0.01 | 0.01  |
| 7    | 8  | 0.00  | 0.00  | -0.01 | 0.00  | -0.01 | -0.03 | 0.00  | 0.00  | 0.00  |
| 8    | 6  | 0.00  | -0.02 | 0.02  | 0.01  | -0.05 | 0.08  | -0.01 | 0.01  | -0.01 |
| 9    | 6  | 0.02  | 0.02  | -0.02 | -0.02 | -0.02 | -0.02 | 0.01  | -0.01 | 0.01  |
| 10   | 1  | 0.03  | -0.06 | -0.04 | 0.03  | -0.07 | -0.06 | 0.01  | -0.03 | 0.00  |
| 11   | 8  | -0.02 | -0.01 | 0.02  | 0.01  | 0.00  | -0.01 | 0.00  | 0.00  | -0.01 |
| 12   | 6  | 0.00  | 0.04  | -0.03 | 0.03  | -0.05 | 0.07  | -0.01 | 0.01  | -0.02 |
| 13   | 1  | -0.07 | -0.04 | 0.05  | 0.07  | -0.02 | 0.03  | 0.00  | 0.01  | -0.02 |
| 14   | 6  | 0.01  | 0.01  | 0.00  | -0.01 | 0.00  | 0.00  | -0.02 | -0.03 | -0.02 |
| 15   | 8  | 0.00  | 0.02  | -0.01 | 0.00  | 0.00  | 0.00  | 0.06  | 0.04  | 0.05  |
| 16   | 6  | 0.01  | 0.01  | -0.02 | 0.02  | 0.03  | -0.07 | 0.01  | -0.01 | 0.00  |
| 17   | 1  | 0.07  | -0.03 | 0.06  | 0.23  | -0.07 | 0.22  | 0.01  | 0.01  | 0.01  |
| 18   | 1  | -0.07 | -0.01 | 0.00  | -0.22 | -0.04 | -0.01 | -0.01 | 0.01  | -0.01 |
| 19   | 1  | -0.08 | 0.01  | -0.01 | -0.24 | 0.04  | -0.01 | 0.02  | 0.00  | 0.02  |
| 20   | 6  | 0.00  | 0.00  | -0.01 | -0.03 | 0.02  | 0.05  | 0.01  | 0.02  | -0.02 |

|    |   |       |       |       |       |       |       |       |       |       |
|----|---|-------|-------|-------|-------|-------|-------|-------|-------|-------|
| 21 | 1 | 0.04  | -0.03 | -0.05 | 0.10  | 0.06  | -0.05 | -0.03 | -0.01 | 0.01  |
| 22 | 6 | 0.02  | -0.02 | -0.03 | 0.07  | -0.03 | -0.04 | -0.02 | -0.02 | -0.01 |
| 23 | 1 | 0.07  | -0.05 | 0.15  | 0.15  | -0.16 | 0.32  | 0.01  | 0.05  | -0.01 |
| 24 | 1 | -0.13 | 0.09  | -0.08 | -0.23 | 0.11  | -0.08 | -0.02 | 0.07  | -0.08 |
| 25 | 1 | -0.06 | 0.06  | 0.01  | -0.16 | 0.14  | -0.03 | 0.04  | -0.02 | 0.07  |
| 26 | 6 | 0.01  | -0.01 | 0.02  | -0.03 | 0.00  | 0.00  | 0.01  | 0.00  | -0.01 |
| 27 | 1 | 0.10  | -0.05 | -0.02 | -0.06 | 0.02  | 0.00  | 0.00  | -0.04 | 0.01  |
| 28 | 1 | -0.02 | -0.02 | -0.01 | 0.04  | -0.04 | 0.01  | 0.05  | 0.00  | 0.01  |
| 29 | 6 | 0.01  | 0.01  | -0.02 | 0.01  | 0.04  | -0.01 | 0.00  | -0.01 | 0.01  |
| 30 | 1 | 0.01  | 0.02  | -0.02 | 0.01  | 0.01  | -0.02 | -0.01 | -0.02 | 0.01  |
| 31 | 1 | 0.00  | 0.04  | 0.01  | 0.00  | 0.07  | 0.00  | 0.00  | -0.01 | -0.01 |
| 32 | 6 | 0.00  | 0.01  | 0.01  | 0.01  | 0.02  | -0.02 | 0.00  | 0.00  | 0.01  |
| 33 | 1 | 0.08  | 0.18  | 0.11  | 0.19  | 0.37  | 0.20  | 0.00  | 0.06  | 0.02  |
| 34 | 6 | 0.01  | -0.02 | -0.05 | 0.01  | -0.03 | -0.09 | 0.00  | -0.01 | -0.01 |
| 35 | 1 | -0.02 | -0.07 | -0.01 | -0.14 | -0.22 | 0.07  | 0.00  | 0.00  | -0.02 |
| 36 | 6 | 0.00  | 0.01  | 0.06  | -0.02 | 0.01  | 0.00  | 0.01  | -0.01 | 0.00  |
| 37 | 1 | 0.06  | -0.02 | 0.13  | 0.05  | -0.01 | 0.07  | -0.02 | 0.01  | -0.05 |
| 38 | 1 | 0.03  | -0.03 | 0.03  | 0.03  | -0.02 | -0.02 | -0.01 | 0.01  | 0.03  |
| 39 | 1 | 0.01  | -0.02 | -0.01 | -0.01 | -0.01 | -0.10 | 0.00  | 0.01  | 0.04  |
| 40 | 6 | -0.01 | 0.01  | -0.01 | 0.03  | 0.01  | 0.00  | -0.02 | 0.01  | 0.00  |
| 41 | 1 | -0.05 | -0.01 | -0.01 | 0.00  | -0.04 | 0.04  | -0.04 | -0.02 | 0.03  |
| 42 | 6 | 0.01  | 0.00  | 0.02  | 0.00  | 0.00  | -0.01 | -0.01 | 0.00  | -0.01 |
| 43 | 1 | -0.04 | -0.02 | 0.07  | 0.01  | 0.01  | -0.03 | 0.03  | 0.01  | -0.05 |
| 44 | 1 | -0.03 | -0.01 | 0.01  | 0.01  | 0.00  | 0.00  | 0.02  | 0.00  | 0.01  |
| 45 | 1 | 0.00  | 0.01  | -0.04 | 0.00  | 0.01  | 0.00  | 0.00  | 0.00  | 0.04  |
| 46 | 6 | 0.02  | 0.01  | -0.03 | 0.00  | -0.01 | 0.00  | -0.02 | 0.00  | 0.00  |
| 47 | 1 | -0.26 | -0.05 | 0.31  | 0.03  | 0.00  | -0.03 | 0.03  | 0.02  | -0.08 |
| 48 | 6 | -0.01 | 0.00  | 0.01  | 0.00  | 0.01  | 0.01  | 0.01  | -0.01 | 0.01  |
| 49 | 1 | 0.05  | 0.10  | 0.04  | 0.00  | 0.02  | 0.00  | -0.02 | -0.03 | -0.02 |
| 50 | 1 | -0.06 | -0.10 | -0.11 | 0.02  | 0.01  | 0.01  | 0.00  | -0.02 | 0.00  |
| 51 | 6 | 0.02  | 0.02  | 0.01  | 0.01  | -0.02 | -0.01 | 0.03  | 0.01  | 0.04  |
| 52 | 1 | 0.10  | -0.06 | -0.04 | -0.01 | -0.02 | -0.02 | 0.07  | 0.05  | 0.10  |
| 53 | 6 | -0.01 | -0.02 | 0.00  | 0.00  | 0.01  | 0.00  | 0.05  | -0.04 | 0.06  |
| 54 | 1 | 0.04  | -0.01 | 0.05  | 0.01  | 0.01  | 0.00  | 0.39  | 0.08  | 0.36  |
| 55 | 6 | -0.01 | -0.03 | -0.01 | 0.00  | 0.01  | 0.00  | 0.00  | 0.07  | -0.01 |
| 56 | 1 | -0.02 | 0.00  | -0.02 | 0.00  | 0.01  | 0.00  | -0.13 | 0.62  | -0.25 |
| 57 | 6 | 0.01  | 0.01  | 0.01  | 0.00  | -0.01 | 0.00  | -0.14 | -0.09 | -0.12 |
| 58 | 1 | 0.03  | 0.01  | 0.03  | -0.01 | 0.00  | 0.00  | -0.22 | -0.08 | -0.20 |
| 59 | 8 | 0.00  | 0.00  | 0.00  | -0.01 | -0.01 | 0.01  | 0.00  | 0.00  | 0.00  |
| 60 | 8 | -0.02 | -0.11 | 0.07  | -0.01 | 0.06  | -0.08 | 0.00  | -0.01 | 0.01  |
| 61 | 8 | 0.00  | 0.01  | 0.02  | 0.00  | 0.00  | 0.00  | 0.00  | 0.00  | 0.00  |
| 62 | 6 | 0.02  | 0.12  | -0.03 | 0.00  | -0.04 | 0.02  | 0.00  | 0.00  | 0.00  |
| 63 | 6 | 0.04  | 0.04  | 0.05  | -0.02 | -0.02 | -0.02 | 0.00  | 0.00  | 0.00  |
| 64 | 6 | 0.00  | 0.08  | 0.02  | 0.00  | -0.03 | -0.01 | 0.00  | 0.00  | 0.00  |
| 65 | 8 | 0.01  | -0.01 | -0.02 | -0.01 | 0.00  | 0.01  | 0.00  | 0.00  | 0.00  |
| 66 | 1 | 0.00  | 0.04  | 0.03  | 0.01  | -0.01 | -0.01 | 0.00  | 0.00  | 0.00  |
| 67 | 6 | 0.01  | -0.06 | -0.03 | 0.00  | 0.02  | 0.02  | 0.00  | 0.00  | 0.00  |
| 68 | 1 | -0.07 | -0.16 | -0.07 | 0.03  | 0.08  | 0.03  | 0.00  | 0.00  | 0.00  |
| 69 | 1 | -0.01 | 0.03  | 0.02  | 0.01  | 0.00  | -0.01 | 0.00  | 0.00  | 0.00  |
| 70 | 1 | -0.06 | -0.07 | -0.03 | 0.02  | 0.01  | 0.00  | 0.00  | 0.00  | 0.00  |
| 71 | 6 | -0.06 | -0.07 | -0.04 | 0.02  | 0.02  | 0.02  | 0.00  | 0.00  | 0.00  |
| 72 | 1 | -0.23 | 0.11  | 0.36  | 0.07  | -0.03 | -0.11 | 0.00  | 0.00  | 0.00  |

|                |    |           |       |       |           |       |       |           |       |       |
|----------------|----|-----------|-------|-------|-----------|-------|-------|-----------|-------|-------|
| 73             | 1  | 0.26      | 0.12  | -0.16 | -0.09     | -0.03 | 0.06  | 0.01      | -0.01 | -0.01 |
| 74             | 1  | 0.28      | 0.06  | -0.08 | -0.09     | -0.02 | 0.02  | -0.01     | 0.00  | 0.01  |
|                |    | 112       |       |       | 113       |       |       | 114       |       |       |
|                |    | A         |       |       | A         |       |       | A         |       |       |
| Frequencies -- |    | 1094.8329 |       |       | 1099.4941 |       |       | 1122.8634 |       |       |
| Red. masses -- |    | 2.4570    |       |       | 2.2230    |       |       | 3.2435    |       |       |
| Frc consts --  |    | 1.7352    |       |       | 1.5834    |       |       | 2.4095    |       |       |
| IR Inten --    |    | 17.6173   |       |       | 48.0338   |       |       | 21.5468   |       |       |
| Raman Activ -- |    | 1.7941    |       |       | 2.0757    |       |       | 4.0892    |       |       |
| Depolar (P) -- |    | 0.6291    |       |       | 0.7482    |       |       | 0.6842    |       |       |
| Depolar (U) -- |    | 0.7724    |       |       | 0.8560    |       |       | 0.8125    |       |       |
| Atom           | AN | X         | Y     | Z     | X         | Y     | Z     | X         | Y     | Z     |
| 1              | 6  | 0.12      | 0.01  | 0.10  | 0.06      | 0.04  | 0.02  | -0.01     | -0.04 | -0.01 |
| 2              | 6  | -0.06     | 0.02  | 0.09  | 0.00      | -0.01 | -0.01 | -0.04     | 0.02  | 0.05  |
| 3              | 6  | -0.03     | 0.00  | -0.02 | -0.04     | -0.01 | -0.01 | 0.02      | 0.00  | -0.08 |
| 4              | 6  | -0.03     | 0.01  | 0.02  | -0.02     | 0.00  | 0.01  | 0.00      | 0.01  | 0.26  |
| 5              | 6  | 0.05      | 0.03  | 0.03  | -0.04     | -0.06 | -0.05 | -0.05     | 0.00  | -0.06 |
| 6              | 6  | 0.02      | -0.02 | 0.03  | -0.03     | 0.04  | -0.09 | -0.06     | 0.05  | -0.09 |
| 7              | 8  | 0.01      | -0.02 | -0.02 | -0.01     | -0.02 | 0.00  | 0.01      | 0.01  | -0.01 |
| 8              | 6  | -0.04     | 0.06  | -0.07 | -0.02     | 0.04  | -0.03 | -0.03     | -0.02 | -0.01 |
| 9              | 6  | 0.01      | -0.05 | 0.04  | -0.08     | -0.04 | -0.02 | 0.10      | 0.04  | 0.00  |
| 10             | 1  | 0.03      | -0.12 | 0.01  | -0.05     | -0.08 | -0.05 | 0.05      | 0.15  | 0.05  |
| 11             | 8  | 0.01      | 0.01  | -0.04 | 0.02      | 0.01  | -0.03 | -0.03     | -0.02 | 0.03  |
| 12             | 6  | -0.05     | 0.03  | -0.07 | 0.07      | -0.04 | 0.11  | -0.10     | 0.00  | -0.12 |
| 13             | 1  | -0.03     | 0.03  | -0.07 | 0.28      | 0.03  | 0.04  | -0.07     | 0.08  | -0.18 |
| 14             | 6  | 0.00      | 0.01  | 0.01  | 0.02      | 0.00  | -0.01 | 0.02      | -0.01 | -0.01 |
| 15             | 8  | -0.01     | -0.02 | -0.01 | 0.00      | 0.01  | 0.00  | -0.01     | 0.01  | -0.01 |
| 16             | 6  | 0.03      | -0.03 | 0.01  | 0.00      | -0.03 | 0.01  | 0.02      | 0.03  | -0.01 |
| 17             | 1  | 0.03      | 0.04  | 0.04  | -0.04     | 0.06  | -0.02 | 0.08      | -0.06 | 0.05  |
| 18             | 1  | -0.05     | 0.05  | -0.04 | -0.01     | 0.05  | -0.05 | 0.00      | -0.05 | 0.05  |
| 19             | 1  | 0.11      | 0.00  | 0.09  | 0.13      | 0.00  | 0.08  | -0.11     | 0.01  | -0.05 |
| 20             | 6  | 0.03      | 0.08  | -0.06 | 0.02      | 0.09  | 0.05  | -0.02     | -0.05 | -0.05 |
| 21             | 1  | -0.12     | -0.04 | 0.03  | -0.05     | 0.03  | 0.09  | -0.04     | -0.01 | -0.02 |
| 22             | 6  | -0.08     | -0.07 | -0.06 | -0.04     | -0.04 | -0.01 | 0.01      | 0.03  | 0.01  |
| 23             | 1  | 0.06      | 0.23  | -0.03 | 0.04      | 0.14  | -0.02 | -0.04     | -0.05 | -0.05 |
| 24             | 1  | -0.10     | 0.30  | -0.34 | -0.02     | 0.15  | -0.17 | 0.04      | -0.09 | 0.09  |
| 25             | 1  | 0.18      | -0.08 | 0.29  | 0.12      | -0.06 | 0.18  | -0.06     | 0.02  | -0.12 |
| 26             | 6  | 0.03      | -0.02 | -0.03 | 0.01      | -0.01 | 0.06  | -0.04     | -0.01 | 0.07  |
| 27             | 1  | 0.02      | -0.11 | 0.02  | 0.19      | 0.01  | -0.05 | 0.14      | 0.02  | -0.06 |
| 28             | 1  | 0.14      | -0.04 | 0.02  | -0.17     | -0.03 | -0.05 | -0.15     | -0.11 | -0.04 |
| 29             | 6  | -0.01     | -0.02 | 0.06  | -0.02     | -0.02 | 0.03  | 0.05      | 0.00  | 0.00  |
| 30             | 1  | -0.04     | -0.09 | 0.07  | 0.01      | -0.03 | 0.00  | -0.09     | -0.02 | 0.09  |
| 31             | 1  | 0.00      | -0.06 | -0.06 | 0.00      | -0.07 | 0.02  | -0.01     | 0.11  | -0.11 |
| 32             | 6  | 0.01      | 0.00  | 0.04  | 0.02      | -0.01 | -0.01 | -0.01     | 0.01  | 0.02  |
| 33             | 1  | 0.03      | 0.27  | 0.11  | -0.04     | -0.04 | -0.06 | 0.07      | 0.21  | 0.12  |
| 34             | 6  | 0.02      | -0.03 | -0.06 | -0.01     | 0.01  | 0.01  | 0.01      | -0.02 | -0.03 |
| 35             | 1  | -0.01     | -0.02 | -0.08 | 0.00      | 0.03  | 0.00  | -0.06     | -0.06 | 0.00  |
| 36             | 6  | 0.01      | -0.03 | -0.01 | 0.04      | 0.02  | -0.01 | 0.03      | -0.01 | -0.09 |
| 37             | 1  | -0.04     | 0.03  | -0.11 | -0.08     | -0.03 | -0.01 | -0.16     | 0.01  | -0.23 |
| 38             | 1  | -0.01     | 0.03  | 0.07  | -0.09     | 0.03  | -0.16 | -0.15     | 0.07  | -0.13 |
| 39             | 1  | 0.01      | 0.04  | 0.07  | 0.01      | -0.06 | 0.18  | 0.00      | 0.01  | 0.18  |
| 40             | 6  | -0.06     | 0.04  | 0.00  | 0.01      | -0.01 | -0.05 | 0.06      | 0.00  | -0.06 |

|    |   |       |       |       |       |       |       |       |       |       |
|----|---|-------|-------|-------|-------|-------|-------|-------|-------|-------|
| 41 | 1 | -0.15 | -0.06 | 0.08  | 0.01  | 0.05  | -0.11 | -0.03 | -0.12 | 0.04  |
| 42 | 6 | -0.02 | 0.01  | -0.01 | 0.02  | 0.00  | 0.05  | 0.05  | 0.00  | 0.05  |
| 43 | 1 | 0.05  | 0.01  | -0.08 | -0.08 | -0.06 | 0.17  | -0.12 | -0.06 | 0.24  |
| 44 | 1 | 0.05  | 0.01  | -0.02 | -0.07 | -0.01 | -0.01 | -0.13 | -0.02 | -0.01 |
| 45 | 1 | 0.00  | -0.02 | 0.07  | -0.02 | -0.01 | -0.08 | -0.02 | 0.00  | -0.18 |
| 46 | 6 | 0.01  | -0.01 | 0.01  | 0.03  | -0.02 | -0.01 | 0.01  | -0.03 | 0.00  |
| 47 | 1 | 0.15  | 0.00  | -0.14 | -0.29 | -0.11 | 0.41  | -0.10 | -0.07 | 0.15  |
| 48 | 6 | -0.02 | 0.00  | 0.00  | -0.01 | 0.01  | -0.01 | 0.01  | 0.02  | -0.03 |
| 49 | 1 | -0.05 | 0.01  | -0.04 | 0.10  | 0.07  | 0.10  | 0.11  | 0.00  | 0.10  |
| 50 | 1 | 0.05  | 0.02  | 0.03  | -0.15 | -0.09 | -0.14 | -0.14 | -0.02 | -0.09 |
| 51 | 6 | -0.01 | 0.01  | -0.02 | 0.01  | 0.02  | 0.02  | -0.01 | -0.01 | 0.03  |
| 52 | 1 | -0.10 | 0.03  | -0.04 | 0.19  | -0.11 | -0.01 | 0.23  | -0.12 | 0.03  |
| 53 | 6 | -0.01 | 0.02  | -0.02 | 0.00  | -0.02 | 0.00  | 0.00  | -0.01 | 0.00  |
| 54 | 1 | -0.14 | -0.02 | -0.13 | 0.04  | -0.01 | 0.04  | 0.04  | 0.00  | 0.03  |
| 55 | 6 | 0.00  | -0.01 | 0.01  | -0.01 | -0.01 | -0.01 | 0.00  | 0.00  | 0.00  |
| 56 | 1 | 0.05  | -0.19 | 0.09  | -0.02 | 0.02  | -0.03 | -0.01 | 0.01  | -0.01 |
| 57 | 6 | 0.04  | 0.02  | 0.03  | 0.00  | 0.01  | 0.00  | 0.00  | 0.02  | 0.00  |
| 58 | 1 | 0.07  | 0.01  | 0.07  | -0.01 | 0.02  | -0.02 | -0.03 | 0.03  | -0.05 |
| 59 | 8 | 0.01  | -0.01 | 0.01  | 0.00  | 0.00  | 0.02  | -0.01 | -0.01 | 0.03  |
| 60 | 8 | 0.01  | -0.01 | 0.05  | -0.02 | 0.04  | -0.09 | 0.03  | -0.01 | 0.08  |
| 61 | 8 | -0.01 | 0.00  | -0.01 | 0.02  | 0.03  | 0.02  | 0.02  | 0.01  | 0.01  |
| 62 | 6 | 0.00  | 0.00  | -0.01 | 0.01  | -0.02 | 0.02  | 0.00  | 0.03  | -0.01 |
| 63 | 6 | 0.00  | -0.02 | 0.00  | -0.01 | 0.00  | -0.01 | 0.00  | -0.02 | 0.01  |
| 64 | 6 | 0.00  | -0.02 | -0.01 | 0.00  | -0.01 | 0.00  | 0.00  | -0.03 | -0.02 |
| 65 | 8 | 0.00  | 0.01  | 0.00  | -0.01 | -0.01 | 0.01  | 0.01  | 0.00  | -0.01 |
| 66 | 1 | 0.00  | -0.02 | -0.01 | 0.00  | -0.01 | -0.01 | 0.01  | -0.04 | -0.01 |
| 67 | 6 | 0.00  | 0.02  | 0.01  | 0.00  | 0.00  | 0.01  | 0.00  | 0.02  | 0.02  |
| 68 | 1 | 0.01  | 0.04  | 0.01  | 0.01  | 0.03  | 0.01  | 0.03  | 0.08  | 0.03  |
| 69 | 1 | 0.00  | 0.01  | 0.00  | 0.00  | 0.00  | -0.01 | 0.01  | 0.01  | -0.01 |
| 70 | 1 | 0.01  | 0.01  | 0.00  | 0.01  | 0.00  | -0.01 | 0.02  | 0.01  | 0.00  |
| 71 | 6 | 0.01  | 0.02  | 0.00  | 0.01  | 0.00  | 0.01  | 0.01  | 0.02  | 0.00  |
| 72 | 1 | 0.05  | -0.04 | -0.05 | 0.01  | 0.00  | -0.03 | 0.05  | -0.04 | -0.05 |
| 73 | 1 | 0.00  | -0.05 | -0.01 | -0.06 | 0.00  | 0.04  | -0.01 | -0.05 | -0.01 |
| 74 | 1 | -0.07 | -0.01 | 0.06  | 0.00  | 0.00  | -0.02 | -0.05 | 0.00  | 0.03  |

|  |     |     |     |
|--|-----|-----|-----|
|  | 115 | 116 | 117 |
|--|-----|-----|-----|

|  |   |   |   |
|--|---|---|---|
|  | A | A | A |
|--|---|---|---|

|                |           |           |           |
|----------------|-----------|-----------|-----------|
| Frequencies -- | 1136.9705 | 1144.3410 | 1148.5582 |
|----------------|-----------|-----------|-----------|

|                |        |        |        |
|----------------|--------|--------|--------|
| Red. masses -- | 1.6845 | 2.6447 | 3.0192 |
|----------------|--------|--------|--------|

|               |        |        |        |
|---------------|--------|--------|--------|
| Frc consts -- | 1.2829 | 2.0405 | 2.3466 |
|---------------|--------|--------|--------|

|             |        |         |          |
|-------------|--------|---------|----------|
| IR Inten -- | 1.6907 | 17.8416 | 146.5450 |
|-------------|--------|---------|----------|

|                |        |        |        |
|----------------|--------|--------|--------|
| Raman Activ -- | 9.6148 | 3.5877 | 3.5872 |
|----------------|--------|--------|--------|

|                |        |        |        |
|----------------|--------|--------|--------|
| Depolar (P) -- | 0.4217 | 0.5768 | 0.3813 |
|----------------|--------|--------|--------|

|                |        |        |        |
|----------------|--------|--------|--------|
| Depolar (U) -- | 0.5932 | 0.7316 | 0.5521 |
|----------------|--------|--------|--------|

| Atom | AN | X     | Y     | Z     | X     | Y     | Z     | X     | Y     | Z     |
|------|----|-------|-------|-------|-------|-------|-------|-------|-------|-------|
| 1    | 6  | -0.05 | 0.05  | 0.02  | -0.03 | 0.04  | 0.02  | -0.01 | 0.00  | -0.02 |
| 2    | 6  | 0.04  | -0.02 | -0.04 | 0.04  | -0.02 | -0.06 | 0.00  | 0.00  | 0.02  |
| 3    | 6  | 0.02  | 0.04  | 0.02  | 0.07  | -0.07 | -0.02 | 0.02  | 0.01  | 0.00  |
| 4    | 6  | -0.02 | 0.05  | 0.01  | -0.11 | 0.12  | -0.03 | -0.05 | -0.01 | 0.04  |
| 5    | 6  | 0.02  | 0.01  | -0.02 | 0.03  | 0.00  | 0.05  | 0.01  | 0.01  | -0.01 |
| 6    | 6  | -0.09 | -0.02 | 0.09  | 0.13  | 0.01  | -0.07 | 0.00  | 0.00  | 0.02  |
| 7    | 8  | 0.00  | 0.01  | 0.01  | -0.01 | -0.01 | 0.01  | 0.00  | 0.00  | 0.00  |
| 8    | 6  | 0.01  | -0.01 | -0.01 | 0.02  | -0.06 | 0.06  | -0.03 | 0.02  | -0.03 |

|    |   |       |       |       |       |       |       |       |       |       |
|----|---|-------|-------|-------|-------|-------|-------|-------|-------|-------|
| 9  | 6 | 0.01  | -0.01 | -0.04 | 0.06  | -0.02 | -0.09 | 0.01  | -0.01 | 0.01  |
| 10 | 1 | 0.05  | -0.04 | -0.06 | 0.16  | -0.21 | -0.17 | -0.07 | 0.11  | 0.07  |
| 11 | 8 | 0.00  | 0.00  | 0.01  | 0.00  | 0.00  | 0.02  | 0.00  | 0.00  | -0.01 |
| 12 | 6 | -0.03 | -0.02 | 0.00  | -0.09 | -0.02 | -0.02 | 0.00  | -0.01 | 0.00  |
| 13 | 1 | 0.02  | -0.01 | 0.00  | 0.13  | 0.04  | -0.06 | 0.02  | 0.06  | -0.09 |
| 14 | 6 | -0.01 | 0.01  | 0.01  | 0.00  | 0.00  | -0.01 | 0.00  | 0.00  | 0.00  |
| 15 | 8 | 0.00  | 0.00  | 0.00  | 0.00  | 0.00  | 0.00  | 0.00  | 0.00  | 0.00  |
| 16 | 6 | -0.01 | 0.00  | 0.01  | -0.01 | 0.02  | -0.02 | 0.01  | 0.00  | 0.01  |
| 17 | 1 | -0.04 | 0.00  | -0.04 | 0.04  | -0.04 | 0.03  | 0.02  | -0.01 | 0.02  |
| 18 | 1 | 0.04  | 0.00  | 0.01  | -0.02 | -0.04 | 0.02  | 0.01  | -0.01 | 0.01  |
| 19 | 1 | 0.01  | -0.01 | -0.02 | -0.11 | 0.01  | -0.04 | 0.00  | 0.00  | 0.00  |
| 20 | 6 | -0.01 | 0.00  | 0.04  | -0.03 | 0.06  | 0.09  | 0.01  | -0.02 | -0.01 |
| 21 | 1 | -0.01 | 0.00  | 0.04  | 0.03  | 0.07  | 0.04  | -0.02 | 0.02  | 0.02  |
| 22 | 6 | 0.03  | -0.03 | -0.02 | 0.01  | -0.02 | -0.01 | 0.01  | 0.00  | 0.01  |
| 23 | 1 | 0.08  | -0.05 | 0.16  | 0.06  | -0.01 | 0.09  | 0.00  | -0.01 | 0.00  |
| 24 | 1 | -0.11 | 0.07  | -0.06 | -0.07 | 0.07  | -0.06 | 0.01  | -0.01 | 0.02  |
| 25 | 1 | -0.04 | 0.05  | 0.04  | -0.01 | 0.03  | 0.07  | -0.01 | 0.00  | -0.02 |
| 26 | 6 | 0.00  | 0.02  | -0.04 | -0.03 | -0.04 | 0.03  | -0.01 | 0.00  | -0.01 |
| 27 | 1 | -0.14 | 0.01  | 0.05  | 0.13  | -0.08 | -0.04 | -0.06 | 0.02  | 0.01  |
| 28 | 1 | 0.35  | -0.24 | 0.03  | -0.27 | 0.15  | -0.01 | 0.09  | -0.07 | 0.01  |
| 29 | 6 | 0.00  | 0.00  | 0.00  | -0.02 | 0.02  | -0.02 | 0.03  | 0.00  | 0.02  |
| 30 | 1 | 0.00  | 0.02  | 0.00  | 0.03  | 0.06  | -0.04 | -0.08 | -0.02 | 0.09  |
| 31 | 1 | 0.00  | 0.00  | 0.01  | -0.01 | 0.02  | 0.08  | 0.01  | -0.01 | -0.12 |
| 32 | 6 | -0.01 | -0.01 | 0.00  | 0.01  | 0.00  | -0.04 | 0.00  | 0.00  | 0.01  |
| 33 | 1 | -0.08 | -0.22 | -0.10 | -0.03 | -0.17 | -0.10 | 0.03  | 0.08  | 0.05  |
| 34 | 6 | 0.00  | 0.02  | 0.02  | -0.01 | 0.03  | 0.04  | 0.00  | -0.01 | -0.01 |
| 35 | 1 | 0.14  | 0.11  | -0.05 | 0.05  | 0.03  | 0.04  | -0.04 | -0.02 | 0.00  |
| 36 | 6 | 0.02  | -0.04 | 0.00  | 0.05  | -0.08 | 0.01  | 0.03  | -0.01 | -0.02 |
| 37 | 1 | -0.06 | 0.05  | -0.18 | -0.13 | 0.07  | -0.31 | -0.08 | 0.00  | -0.09 |
| 38 | 1 | -0.05 | 0.04  | 0.08  | -0.10 | 0.10  | 0.19  | -0.07 | 0.03  | -0.04 |
| 39 | 1 | 0.02  | 0.07  | 0.11  | 0.04  | 0.12  | 0.28  | 0.01  | -0.01 | 0.12  |
| 40 | 6 | -0.01 | 0.04  | 0.01  | 0.02  | 0.03  | -0.01 | 0.01  | 0.02  | 0.01  |
| 41 | 1 | -0.21 | -0.38 | 0.38  | -0.02 | 0.07  | -0.06 | -0.04 | -0.11 | 0.13  |
| 42 | 6 | 0.04  | 0.01  | -0.03 | -0.07 | 0.00  | 0.02  | -0.01 | 0.00  | -0.01 |
| 43 | 1 | -0.05 | 0.03  | 0.04  | 0.11  | -0.03 | -0.13 | 0.02  | 0.02  | -0.05 |
| 44 | 1 | -0.06 | 0.00  | -0.01 | 0.13  | 0.01  | 0.00  | 0.01  | 0.00  | 0.00  |
| 45 | 1 | 0.01  | 0.06  | -0.17 | -0.02 | -0.09 | 0.29  | 0.00  | 0.00  | 0.02  |
| 46 | 6 | 0.03  | -0.03 | -0.03 | -0.01 | -0.03 | 0.04  | 0.01  | -0.02 | 0.00  |
| 47 | 1 | -0.10 | -0.13 | 0.22  | 0.16  | -0.03 | -0.11 | 0.00  | -0.05 | 0.04  |
| 48 | 6 | -0.03 | 0.01  | 0.02  | 0.00  | -0.01 | -0.04 | -0.01 | 0.00  | 0.00  |
| 49 | 1 | -0.01 | 0.09  | 0.01  | 0.11  | 0.00  | 0.09  | 0.04  | 0.05  | 0.04  |
| 50 | 1 | -0.02 | -0.09 | -0.09 | -0.09 | 0.02  | -0.02 | -0.03 | -0.03 | -0.04 |
| 51 | 6 | 0.06  | -0.01 | -0.03 | -0.05 | 0.02  | 0.02  | 0.01  | 0.00  | -0.01 |
| 52 | 1 | 0.02  | -0.05 | -0.09 | -0.03 | -0.02 | -0.01 | 0.01  | -0.03 | -0.04 |
| 53 | 6 | 0.00  | 0.00  | 0.00  | 0.00  | 0.01  | 0.00  | 0.00  | 0.00  | 0.00  |
| 54 | 1 | 0.00  | 0.00  | 0.00  | -0.02 | 0.00  | -0.02 | -0.01 | 0.00  | -0.01 |
| 55 | 6 | 0.00  | 0.00  | 0.00  | 0.00  | 0.00  | 0.00  | 0.00  | -0.01 | 0.00  |
| 56 | 1 | 0.00  | 0.00  | 0.00  | 0.01  | -0.03 | 0.01  | 0.00  | -0.02 | 0.01  |
| 57 | 6 | 0.00  | 0.00  | 0.00  | 0.00  | 0.00  | 0.00  | 0.00  | 0.00  | 0.00  |
| 58 | 1 | -0.01 | 0.00  | 0.01  | 0.02  | -0.01 | 0.01  | 0.01  | 0.00  | 0.01  |
| 59 | 8 | 0.01  | -0.03 | -0.02 | -0.01 | 0.00  | 0.00  | 0.00  | -0.01 | -0.01 |
| 60 | 8 | 0.00  | 0.00  | 0.00  | 0.01  | -0.01 | 0.03  | 0.03  | 0.08  | -0.02 |

|    |   |       |       |       |       |       |       |       |       |       |
|----|---|-------|-------|-------|-------|-------|-------|-------|-------|-------|
| 61 | 8 | 0.00  | 0.01  | 0.00  | 0.01  | 0.02  | -0.02 | 0.00  | 0.01  | 0.00  |
| 62 | 6 | 0.01  | 0.02  | 0.00  | 0.00  | 0.00  | -0.01 | -0.08 | -0.20 | 0.02  |
| 63 | 6 | -0.01 | -0.01 | 0.00  | 0.00  | 0.00  | 0.00  | 0.04  | 0.02  | -0.06 |
| 64 | 6 | 0.00  | -0.02 | -0.02 | 0.00  | 0.01  | 0.01  | -0.02 | 0.20  | 0.16  |
| 65 | 8 | 0.00  | 0.00  | 0.00  | 0.00  | 0.00  | -0.01 | 0.01  | 0.03  | 0.01  |
| 66 | 1 | 0.00  | -0.03 | -0.01 | 0.00  | 0.01  | 0.01  | 0.00  | 0.30  | 0.14  |
| 67 | 6 | 0.00  | 0.01  | 0.01  | 0.00  | 0.00  | -0.01 | 0.05  | -0.12 | -0.14 |
| 68 | 1 | 0.02  | 0.06  | 0.02  | -0.01 | -0.02 | -0.01 | -0.18 | -0.62 | -0.18 |
| 69 | 1 | 0.00  | 0.01  | -0.01 | 0.00  | 0.00  | 0.01  | -0.05 | -0.04 | 0.14  |
| 70 | 1 | 0.01  | 0.00  | 0.00  | -0.01 | 0.00  | 0.00  | -0.14 | 0.03  | 0.06  |
| 71 | 6 | 0.00  | 0.01  | 0.00  | 0.00  | 0.00  | 0.00  | -0.01 | -0.02 | 0.01  |
| 72 | 1 | 0.02  | -0.02 | -0.02 | 0.00  | 0.00  | 0.00  | -0.10 | 0.08  | 0.11  |
| 73 | 1 | -0.01 | -0.02 | 0.00  | 0.01  | 0.00  | -0.01 | -0.04 | 0.07  | 0.05  |
| 74 | 1 | -0.01 | 0.00  | 0.01  | 0.00  | 0.00  | 0.00  | 0.00  | -0.01 | 0.00  |

118

119

120

A

A

A

|                |           |           |           |
|----------------|-----------|-----------|-----------|
| Frequencies -- | 1157.5523 | 1164.4072 | 1166.7314 |
| Red. masses -- | 2.2216    | 2.1615    | 2.7168    |
| Frc consts --  | 1.7539    | 1.7267    | 2.1789    |
| IR Inten --    | 15.5290   | 18.4613   | 14.6259   |
| Raman Activ -- | 4.7107    | 3.0444    | 5.1602    |
| Depolar (P) -- | 0.7299    | 0.4557    | 0.5575    |
| Depolar (U) -- | 0.8438    | 0.6261    | 0.7159    |

| Atom | AN | X     | Y     | Z     | X     | Y     | Z     | X     | Y     | Z     |
|------|----|-------|-------|-------|-------|-------|-------|-------|-------|-------|
| 1    | 6  | -0.01 | -0.06 | -0.08 | -0.07 | 0.00  | 0.08  | 0.11  | -0.09 | 0.06  |
| 2    | 6  | -0.02 | 0.02  | 0.04  | -0.02 | 0.00  | 0.05  | -0.03 | 0.02  | -0.01 |
| 3    | 6  | 0.02  | 0.00  | 0.05  | 0.01  | -0.01 | -0.03 | -0.03 | 0.03  | 0.00  |
| 4    | 6  | -0.02 | 0.15  | -0.07 | 0.05  | 0.08  | -0.04 | -0.02 | 0.06  | 0.03  |
| 5    | 6  | -0.02 | -0.03 | 0.01  | 0.05  | 0.00  | 0.08  | -0.02 | -0.01 | -0.01 |
| 6    | 6  | 0.04  | -0.04 | 0.01  | -0.05 | 0.08  | -0.08 | 0.00  | -0.03 | 0.02  |
| 7    | 8  | 0.01  | 0.01  | 0.00  | 0.01  | 0.02  | -0.01 | 0.01  | 0.01  | 0.00  |
| 8    | 6  | -0.06 | 0.05  | -0.06 | 0.06  | 0.03  | -0.07 | 0.15  | -0.07 | 0.13  |
| 9    | 6  | -0.03 | 0.05  | 0.00  | -0.03 | 0.01  | 0.05  | -0.02 | 0.05  | 0.12  |
| 10   | 1  | -0.11 | 0.40  | 0.11  | -0.08 | 0.21  | 0.11  | -0.04 | 0.10  | 0.14  |
| 11   | 8  | -0.01 | -0.01 | 0.00  | 0.02  | 0.01  | -0.01 | 0.05  | 0.01  | -0.01 |
| 12   | 6  | 0.02  | -0.09 | 0.07  | 0.01  | -0.05 | 0.02  | 0.06  | -0.06 | -0.03 |
| 13   | 1  | 0.14  | -0.06 | 0.06  | -0.02 | -0.06 | 0.03  | -0.04 | -0.04 | -0.06 |
| 14   | 6  | 0.00  | 0.02  | 0.01  | 0.01  | -0.03 | -0.02 | 0.00  | 0.01  | 0.01  |
| 15   | 8  | 0.01  | 0.01  | 0.01  | -0.01 | -0.02 | -0.01 | 0.01  | 0.01  | 0.00  |
| 16   | 6  | 0.02  | -0.01 | 0.02  | -0.03 | -0.02 | 0.04  | -0.04 | 0.02  | -0.05 |
| 17   | 1  | 0.01  | 0.01  | 0.01  | -0.14 | 0.05  | -0.13 | 0.01  | -0.02 | 0.01  |
| 18   | 1  | 0.02  | 0.01  | 0.01  | 0.10  | 0.05  | -0.02 | -0.10 | -0.01 | -0.04 |
| 19   | 1  | 0.04  | -0.01 | 0.03  | 0.14  | -0.02 | -0.01 | -0.10 | 0.02  | -0.04 |
| 20   | 6  | 0.04  | -0.04 | -0.06 | 0.01  | -0.03 | -0.06 | -0.10 | 0.01  | -0.11 |
| 21   | 1  | -0.03 | 0.06  | 0.03  | -0.03 | 0.00  | -0.02 | 0.00  | -0.04 | -0.19 |
| 22   | 6  | -0.01 | 0.04  | 0.05  | 0.04  | 0.00  | -0.04 | -0.05 | 0.02  | -0.01 |
| 23   | 1  | -0.11 | -0.01 | -0.17 | 0.07  | -0.11 | 0.17  | -0.08 | 0.09  | -0.16 |
| 24   | 1  | 0.14  | -0.15 | 0.15  | -0.15 | 0.04  | -0.02 | 0.07  | 0.00  | -0.03 |
| 25   | 1  | 0.00  | -0.05 | -0.13 | -0.12 | 0.11  | -0.04 | 0.07  | -0.06 | 0.01  |
| 26   | 6  | 0.00  | 0.00  | 0.00  | -0.03 | -0.01 | 0.04  | 0.01  | 0.01  | -0.01 |
| 27   | 1  | -0.04 | 0.05  | 0.00  | 0.22  | -0.19 | -0.03 | -0.04 | 0.04  | 0.01  |
| 28   | 1  | -0.02 | 0.05  | 0.01  | -0.12 | -0.03 | -0.03 | 0.05  | -0.02 | 0.00  |



|    |   |       |       |       |       |       |       |       |       |       |
|----|---|-------|-------|-------|-------|-------|-------|-------|-------|-------|
| 29 | 6 | 0.05  | -0.02 | 0.03  | -0.03 | -0.02 | 0.01  | -0.10 | 0.02  | -0.07 |
| 30 | 1 | -0.10 | -0.06 | 0.12  | 0.07  | -0.02 | -0.06 | 0.33  | -0.01 | -0.38 |
| 31 | 1 | 0.00  | 0.04  | -0.14 | -0.02 | -0.01 | 0.12  | -0.11 | 0.16  | 0.53  |
| 32 | 6 | 0.01  | 0.01  | 0.03  | -0.04 | -0.01 | 0.04  | -0.02 | 0.02  | -0.02 |
| 33 | 1 | 0.08  | 0.27  | 0.14  | -0.09 | -0.18 | -0.03 | 0.00  | -0.06 | -0.02 |
| 34 | 6 | 0.00  | -0.02 | -0.02 | 0.02  | -0.01 | -0.04 | 0.01  | -0.01 | 0.00  |
| 35 | 1 | -0.16 | -0.10 | 0.04  | 0.28  | 0.20  | -0.22 | 0.02  | -0.07 | 0.05  |
| 36 | 6 | 0.01  | -0.08 | 0.02  | -0.04 | -0.03 | 0.02  | 0.01  | -0.03 | -0.01 |
| 37 | 1 | -0.04 | 0.10  | -0.28 | 0.10  | 0.07  | -0.06 | -0.04 | 0.03  | -0.14 |
| 38 | 1 | 0.00  | 0.06  | 0.27  | 0.10  | -0.02 | 0.20  | -0.02 | 0.03  | 0.07  |
| 39 | 1 | 0.03  | 0.16  | 0.09  | -0.01 | 0.11  | -0.16 | 0.01  | 0.05  | 0.07  |
| 40 | 6 | 0.00  | 0.01  | 0.00  | 0.03  | 0.00  | -0.03 | -0.01 | 0.00  | 0.00  |
| 41 | 1 | -0.07 | -0.08 | 0.07  | -0.04 | -0.08 | 0.02  | -0.05 | -0.03 | 0.02  |
| 42 | 6 | -0.03 | 0.02  | -0.01 | 0.03  | -0.03 | 0.03  | 0.00  | 0.01  | -0.01 |
| 43 | 1 | 0.06  | -0.03 | -0.06 | -0.07 | 0.02  | 0.09  | 0.01  | -0.01 | -0.01 |
| 44 | 1 | 0.08  | 0.02  | -0.05 | -0.10 | -0.03 | 0.10  | 0.02  | 0.01  | -0.04 |
| 45 | 1 | -0.01 | -0.05 | 0.12  | 0.00  | 0.06  | -0.12 | 0.00  | -0.02 | 0.01  |
| 46 | 6 | 0.02  | -0.02 | 0.00  | -0.03 | -0.02 | 0.03  | 0.01  | -0.02 | -0.01 |
| 47 | 1 | -0.01 | -0.13 | 0.17  | 0.17  | 0.05  | -0.24 | -0.02 | -0.11 | 0.14  |
| 48 | 6 | -0.01 | 0.00  | 0.00  | 0.02  | 0.00  | -0.02 | -0.01 | 0.00  | 0.00  |
| 49 | 1 | 0.03  | 0.04  | 0.03  | 0.03  | -0.05 | 0.02  | 0.02  | 0.03  | 0.03  |
| 50 | 1 | -0.07 | -0.07 | -0.08 | -0.01 | 0.06  | 0.04  | -0.06 | -0.06 | -0.07 |
| 51 | 6 | 0.01  | 0.02  | -0.01 | -0.03 | -0.01 | 0.03  | 0.01  | 0.01  | -0.01 |
| 52 | 1 | -0.09 | 0.00  | -0.07 | 0.19  | -0.07 | 0.07  | -0.04 | -0.01 | -0.05 |
| 53 | 6 | 0.00  | 0.00  | 0.00  | 0.00  | 0.00  | 0.00  | 0.00  | 0.00  | 0.00  |
| 54 | 1 | -0.04 | -0.02 | -0.03 | 0.06  | 0.02  | 0.05  | -0.03 | -0.02 | -0.03 |
| 55 | 6 | 0.00  | -0.02 | 0.00  | 0.00  | 0.02  | 0.00  | 0.00  | -0.02 | 0.00  |
| 56 | 1 | 0.00  | -0.01 | 0.00  | 0.01  | 0.01  | 0.00  | -0.01 | -0.01 | 0.00  |
| 57 | 6 | -0.01 | -0.02 | -0.01 | 0.01  | 0.02  | 0.01  | -0.01 | -0.01 | -0.01 |
| 58 | 1 | 0.02  | -0.02 | 0.03  | -0.03 | 0.03  | -0.05 | 0.01  | -0.01 | 0.01  |
| 59 | 8 | 0.00  | -0.01 | -0.01 | 0.00  | -0.01 | 0.01  | 0.01  | -0.01 | 0.00  |
| 60 | 8 | -0.01 | 0.00  | -0.03 | 0.00  | 0.02  | -0.02 | 0.00  | 0.02  | 0.00  |
| 61 | 8 | 0.00  | 0.02  | 0.00  | -0.01 | 0.01  | -0.02 | 0.01  | 0.01  | 0.00  |
| 62 | 6 | 0.01  | 0.03  | 0.00  | -0.01 | -0.01 | 0.00  | -0.01 | -0.01 | 0.00  |
| 63 | 6 | -0.01 | 0.00  | 0.01  | 0.00  | 0.00  | -0.01 | 0.00  | 0.00  | -0.01 |
| 64 | 6 | 0.00  | -0.03 | -0.02 | 0.00  | 0.01  | 0.01  | 0.00  | 0.01  | 0.01  |
| 65 | 8 | 0.00  | -0.01 | 0.00  | 0.00  | 0.00  | 0.00  | 0.00  | 0.00  | 0.00  |
| 66 | 1 | 0.00  | -0.06 | -0.02 | 0.00  | 0.02  | 0.01  | 0.00  | 0.02  | 0.01  |
| 67 | 6 | -0.01 | 0.01  | 0.02  | 0.00  | -0.01 | -0.01 | 0.00  | -0.01 | -0.01 |
| 68 | 1 | 0.03  | 0.10  | 0.03  | -0.01 | -0.04 | -0.01 | -0.01 | -0.04 | -0.01 |
| 69 | 1 | 0.01  | 0.00  | -0.03 | 0.00  | 0.00  | 0.01  | 0.00  | 0.00  | 0.01  |
| 70 | 1 | 0.02  | -0.01 | -0.01 | -0.01 | 0.00  | 0.00  | -0.01 | 0.01  | 0.01  |
| 71 | 6 | 0.00  | 0.00  | 0.00  | 0.00  | 0.00  | 0.00  | 0.00  | 0.00  | 0.00  |
| 72 | 1 | 0.01  | -0.01 | -0.01 | -0.01 | 0.01  | 0.01  | 0.00  | 0.00  | 0.00  |
| 73 | 1 | 0.00  | 0.00  | 0.00  | 0.00  | 0.01  | 0.00  | -0.02 | 0.00  | 0.01  |
| 74 | 1 | 0.02  | 0.00  | -0.01 | -0.01 | 0.00  | 0.01  | -0.01 | 0.00  | 0.00  |

121

122

123

A

A

A

|                |           |           |           |
|----------------|-----------|-----------|-----------|
| Frequencies -- | 1173.3561 | 1179.6911 | 1185.4060 |
|----------------|-----------|-----------|-----------|

|                |        |        |        |
|----------------|--------|--------|--------|
| Red. masses -- | 2.2000 | 1.9493 | 3.0904 |
|----------------|--------|--------|--------|

|               |        |        |        |
|---------------|--------|--------|--------|
| Frc consts -- | 1.7846 | 1.5983 | 2.5586 |
|---------------|--------|--------|--------|

|             |         |        |         |
|-------------|---------|--------|---------|
| IR Inten -- | 14.6493 | 1.9628 | 15.4074 |
|-------------|---------|--------|---------|

|    |      |       |       |                |        |       |       |        |       |       |        |
|----|------|-------|-------|----------------|--------|-------|-------|--------|-------|-------|--------|
|    |      |       |       | Raman Activ -- | 4.2225 |       |       | 1.1190 |       |       | 0.3306 |
|    |      |       |       | Depolar (P) -- | 0.6685 |       |       | 0.5247 |       |       | 0.4519 |
|    |      |       |       | Depolar (U) -- | 0.8013 |       |       | 0.6883 |       |       | 0.6225 |
|    | Atom | AN    | X     | Y              | Z      | X     | Y     | Z      | X     | Y     | Z      |
| 1  | 6    | 0.08  | -0.01 | -0.07          | 0.00   | -0.01 | -0.01 | 0.00   | 0.01  | 0.00  |        |
| 2  | 6    | 0.02  | 0.00  | -0.06          | 0.00   | 0.00  | 0.01  | 0.00   | 0.00  | -0.01 |        |
| 3  | 6    | -0.04 | 0.02  | 0.06           | 0.01   | 0.01  | 0.01  | -0.01  | 0.00  | 0.00  |        |
| 4  | 6    | 0.03  | 0.06  | -0.05          | -0.10  | -0.10 | -0.03 | 0.07   | 0.01  | 0.00  |        |
| 5  | 6    | 0.06  | 0.00  | 0.08           | -0.02  | 0.01  | 0.03  | 0.00   | 0.01  | 0.03  |        |
| 6  | 6    | -0.11 | 0.11  | -0.01          | 0.06   | 0.13  | 0.02  | -0.06  | 0.02  | -0.01 |        |
| 7  | 8    | -0.01 | -0.02 | 0.01           | 0.00   | 0.01  | 0.00  | 0.00   | 0.00  | 0.00  |        |
| 8  | 6    | -0.05 | -0.01 | 0.07           | 0.00   | -0.01 | -0.01 | -0.01  | 0.02  | 0.01  |        |
| 9  | 6    | 0.01  | -0.01 | -0.03          | -0.01  | 0.02  | 0.02  | 0.00   | -0.01 | -0.01 |        |
| 10 | 1    | 0.08  | -0.18 | -0.09          | -0.07  | 0.13  | 0.07  | 0.05   | -0.13 | -0.06 |        |
| 11 | 8    | 0.00  | -0.01 | 0.00           | 0.00   | 0.00  | 0.00  | 0.00   | 0.00  | 0.00  |        |
| 12 | 6    | -0.02 | -0.01 | 0.00           | 0.06   | 0.04  | 0.02  | -0.02  | 0.00  | -0.01 |        |
| 13 | 1    | -0.09 | -0.06 | 0.03           | 0.11   | 0.03  | 0.03  | -0.10  | -0.03 | 0.01  |        |
| 14 | 6    | 0.00  | -0.04 | -0.01          | 0.00   | -0.01 | 0.00  | 0.05   | 0.11  | 0.03  |        |
| 15 | 8    | -0.03 | -0.04 | -0.02          | 0.00   | 0.00  | 0.00  | 0.12   | 0.18  | 0.08  |        |
| 16 | 6    | 0.02  | 0.00  | -0.03          | 0.00   | 0.01  | 0.00  | 0.00   | -0.01 | 0.00  |        |
| 17 | 1    | 0.11  | -0.01 | 0.11           | 0.00   | -0.01 | -0.01 | 0.00   | 0.02  | 0.01  |        |
| 18 | 1    | -0.11 | -0.02 | -0.01          | 0.02   | -0.01 | 0.01  | -0.02  | 0.01  | -0.02 |        |
| 19 | 1    | -0.08 | 0.02  | 0.05           | -0.01  | 0.00  | -0.02 | 0.02   | 0.00  | 0.03  |        |
| 20 | 6    | 0.00  | 0.04  | 0.04           | 0.00   | -0.03 | -0.03 | 0.01   | 0.01  | 0.02  |        |
| 21 | 1    | 0.03  | 0.00  | -0.01          | -0.01  | -0.01 | -0.02 | 0.02   | -0.01 | 0.01  |        |
| 22 | 6    | -0.04 | 0.01  | 0.04           | 0.00   | 0.00  | 0.01  | 0.00   | 0.00  | 0.00  |        |
| 23 | 1    | -0.08 | 0.12  | -0.19          | -0.01  | 0.00  | -0.01 | 0.00   | 0.00  | 0.00  |        |
| 24 | 1    | 0.16  | -0.05 | 0.03           | 0.02   | -0.01 | 0.02  | 0.00   | 0.00  | 0.00  |        |
| 25 | 1    | 0.13  | -0.12 | 0.04           | 0.00   | -0.01 | -0.02 | 0.01   | 0.00  | 0.01  |        |
| 26 | 6    | 0.00  | 0.00  | 0.00           | -0.02  | -0.05 | -0.02 | 0.00   | 0.01  | 0.01  |        |
| 27 | 1    | 0.11  | -0.17 | 0.02           | -0.09  | -0.04 | 0.02  | 0.07   | -0.07 | 0.00  |        |
| 28 | 1    | 0.10  | -0.13 | -0.01          | 0.24   | -0.24 | 0.02  | -0.02  | 0.00  | -0.01 |        |
| 29 | 6    | 0.01  | 0.02  | -0.01          | 0.01   | 0.00  | 0.00  | 0.00   | 0.00  | 0.00  |        |
| 30 | 1    | -0.02 | 0.00  | 0.01           | 0.00   | 0.00  | 0.00  | -0.01  | 0.00  | 0.01  |        |
| 31 | 1    | 0.02  | 0.00  | -0.05          | -0.01  | 0.03  | 0.00  | 0.02   | -0.05 | -0.03 |        |
| 32 | 6    | 0.04  | 0.01  | -0.04          | -0.01  | 0.00  | 0.01  | 0.01   | 0.00  | -0.01 |        |
| 33 | 1    | 0.08  | 0.17  | 0.03           | 0.01   | 0.02  | 0.02  | 0.00   | 0.00  | -0.01 |        |
| 34 | 6    | -0.02 | 0.00  | 0.04           | 0.00   | 0.00  | 0.00  | 0.00   | 0.00  | 0.00  |        |
| 35 | 1    | -0.30 | -0.22 | 0.22           | 0.01   | 0.01  | -0.01 | -0.04  | -0.03 | 0.02  |        |
| 36 | 6    | -0.03 | -0.04 | 0.02           | 0.05   | 0.05  | 0.00  | -0.04  | -0.01 | 0.00  |        |
| 37 | 1    | 0.05  | 0.06  | -0.08          | -0.09  | -0.08 | 0.13  | 0.08   | 0.03  | 0.01  |        |
| 38 | 1    | 0.07  | -0.01 | 0.17           | -0.09  | 0.01  | -0.22 | 0.08   | -0.03 | 0.08  |        |
| 39 | 1    | 0.00  | 0.09  | -0.09          | 0.00   | -0.14 | 0.18  | -0.01  | 0.04  | -0.13 |        |
| 40 | 6    | 0.00  | -0.03 | 0.00           | -0.01  | 0.03  | 0.03  | 0.00   | -0.02 | -0.01 |        |
| 41 | 1    | 0.02  | -0.05 | 0.03           | 0.02   | -0.13 | 0.21  | 0.03   | 0.06  | -0.08 |        |
| 42 | 6    | 0.05  | -0.05 | 0.00           | -0.04  | -0.05 | -0.01 | 0.03   | -0.01 | 0.00  |        |
| 43 | 1    | -0.11 | 0.10  | 0.07           | 0.04   | 0.11  | -0.17 | -0.05  | 0.02  | 0.06  |        |
| 44 | 1    | -0.16 | -0.05 | 0.17           | 0.05   | -0.03 | 0.21  | -0.07  | -0.01 | 0.03  |        |
| 45 | 1    | 0.03  | 0.13  | -0.24          | 0.04   | 0.10  | 0.11  | 0.01   | 0.04  | -0.11 |        |
| 46 | 6    | -0.02 | -0.04 | 0.01           | -0.05  | -0.05 | 0.06  | -0.06  | -0.03 | 0.03  |        |
| 47 | 1    | 0.13  | -0.01 | -0.18          | 0.17   | -0.02 | -0.18 | 0.15   | -0.04 | -0.15 |        |
| 48 | 6    | 0.00  | 0.00  | -0.01          | 0.02   | 0.00  | -0.06 | 0.04   | 0.04  | -0.02 |        |

|    |   |       |       |       |       |       |       |       |       |       |
|----|---|-------|-------|-------|-------|-------|-------|-------|-------|-------|
| 49 | 1 | 0.02  | -0.02 | 0.02  | 0.33  | 0.07  | 0.29  | 0.15  | -0.01 | 0.13  |
| 50 | 1 | 0.02  | 0.04  | 0.03  | -0.22 | -0.04 | -0.13 | -0.23 | -0.04 | -0.15 |
| 51 | 6 | 0.00  | -0.01 | 0.01  | -0.02 | 0.02  | 0.00  | 0.02  | -0.03 | 0.00  |
| 52 | 1 | 0.23  | -0.08 | 0.06  | 0.17  | -0.20 | -0.11 | -0.09 | -0.18 | -0.18 |
| 53 | 6 | 0.00  | 0.00  | 0.00  | 0.00  | 0.00  | 0.00  | 0.00  | 0.00  | -0.01 |
| 54 | 1 | 0.11  | 0.04  | 0.10  | 0.00  | 0.00  | 0.00  | -0.43 | -0.17 | -0.38 |
| 55 | 6 | 0.00  | 0.04  | 0.00  | 0.00  | -0.01 | 0.00  | -0.02 | -0.20 | 0.02  |
| 56 | 1 | 0.01  | 0.04  | 0.00  | 0.01  | -0.04 | 0.01  | 0.00  | -0.29 | 0.05  |
| 57 | 6 | 0.03  | 0.03  | 0.02  | 0.00  | 0.00  | 0.00  | -0.12 | -0.09 | -0.11 |
| 58 | 1 | -0.04 | 0.05  | -0.05 | -0.01 | 0.01  | -0.02 | -0.03 | -0.10 | -0.02 |
| 59 | 8 | 0.00  | 0.00  | -0.02 | 0.00  | 0.00  | -0.03 | 0.00  | 0.00  | 0.00  |
| 60 | 8 | 0.00  | 0.00  | 0.00  | -0.02 | -0.02 | -0.01 | 0.01  | 0.00  | 0.01  |
| 61 | 8 | 0.00  | 0.01  | -0.03 | 0.02  | 0.02  | -0.03 | 0.01  | 0.01  | -0.01 |
| 62 | 6 | 0.00  | -0.01 | 0.00  | 0.01  | 0.02  | 0.00  | 0.00  | -0.01 | 0.00  |
| 63 | 6 | 0.00  | -0.01 | -0.01 | -0.01 | 0.02  | 0.02  | 0.00  | -0.01 | -0.01 |
| 64 | 6 | 0.00  | 0.01  | 0.01  | 0.01  | -0.02 | -0.02 | 0.00  | 0.00  | 0.01  |
| 65 | 8 | 0.00  | 0.00  | 0.00  | 0.00  | 0.00  | 0.00  | 0.00  | 0.00  | 0.00  |
| 66 | 1 | 0.00  | 0.02  | 0.01  | -0.01 | -0.06 | -0.02 | 0.00  | 0.02  | 0.01  |
| 67 | 6 | 0.00  | 0.00  | -0.01 | -0.01 | 0.01  | 0.02  | 0.00  | 0.00  | -0.01 |
| 68 | 1 | -0.01 | -0.03 | -0.01 | 0.03  | 0.09  | 0.02  | -0.01 | -0.02 | -0.01 |
| 69 | 1 | 0.00  | 0.00  | 0.01  | 0.01  | 0.00  | -0.03 | 0.00  | 0.00  | 0.01  |
| 70 | 1 | -0.01 | 0.01  | 0.01  | 0.02  | -0.02 | -0.01 | -0.01 | 0.01  | 0.00  |
| 71 | 6 | 0.00  | 0.00  | 0.00  | 0.00  | -0.01 | -0.01 | 0.00  | 0.00  | 0.00  |
| 72 | 1 | 0.00  | 0.00  | 0.00  | -0.01 | 0.00  | 0.00  | 0.00  | 0.00  | -0.01 |
| 73 | 1 | 0.00  | 0.00  | 0.00  | 0.02  | 0.01  | -0.01 | -0.01 | 0.00  | 0.00  |
| 74 | 1 | -0.02 | 0.00  | 0.01  | 0.03  | 0.00  | -0.02 | -0.02 | 0.00  | 0.01  |

124

125

126

A

A

A

|                |           |           |           |
|----------------|-----------|-----------|-----------|
| Frequencies -- | 1194.1759 | 1201.9071 | 1209.1768 |
| Red. masses -- | 2.2385    | 1.7790    | 1.9516    |
| Frc consts --  | 1.8808    | 1.5141    | 1.6812    |
| IR Inten --    | 2.0860    | 3.4760    | 0.7102    |
| Raman Activ -- | 2.2813    | 6.7455    | 7.8985    |
| Depolar (P) -- | 0.2340    | 0.2254    | 0.6527    |
| Depolar (U) -- | 0.3792    | 0.3679    | 0.7899    |

| Atom | AN | X     | Y     | Z     | X     | Y     | Z     | X     | Y     | Z     |
|------|----|-------|-------|-------|-------|-------|-------|-------|-------|-------|
| 1    | 6  | -0.07 | -0.08 | -0.02 | -0.01 | -0.01 | 0.03  | 0.00  | 0.02  | 0.01  |
| 2    | 6  | -0.01 | 0.01  | 0.03  | -0.02 | 0.01  | 0.02  | 0.00  | 0.00  | 0.00  |
| 3    | 6  | 0.02  | -0.02 | -0.01 | 0.03  | -0.10 | -0.02 | 0.00  | 0.01  | -0.01 |
| 4    | 6  | -0.02 | 0.00  | 0.02  | -0.05 | 0.02  | 0.01  | 0.15  | 0.04  | 0.03  |
| 5    | 6  | -0.01 | 0.01  | -0.01 | 0.02  | 0.03  | 0.01  | -0.11 | -0.03 | -0.04 |
| 6    | 6  | 0.00  | 0.01  | 0.03  | -0.09 | 0.03  | 0.09  | 0.04  | -0.02 | 0.02  |
| 7    | 8  | 0.00  | 0.00  | 0.00  | 0.00  | 0.00  | 0.00  | 0.00  | 0.00  | 0.00  |
| 8    | 6  | 0.05  | 0.22  | 0.00  | 0.01  | -0.06 | -0.03 | -0.01 | -0.01 | 0.01  |
| 9    | 6  | 0.03  | 0.00  | -0.06 | 0.01  | 0.00  | -0.01 | -0.01 | -0.01 | 0.01  |
| 10   | 1  | 0.16  | -0.22 | -0.17 | -0.02 | 0.12  | 0.03  | 0.01  | -0.13 | -0.03 |
| 11   | 8  | 0.02  | 0.01  | 0.03  | 0.00  | 0.00  | 0.00  | 0.00  | 0.00  | -0.01 |
| 12   | 6  | -0.03 | 0.01  | -0.03 | -0.03 | -0.01 | 0.01  | -0.02 | -0.02 | -0.02 |
| 13   | 1  | -0.02 | 0.03  | -0.04 | 0.21  | 0.08  | -0.05 | -0.16 | -0.04 | -0.01 |
| 14   | 6  | 0.00  | -0.01 | 0.00  | 0.00  | 0.00  | 0.01  | 0.02  | 0.03  | 0.03  |
| 15   | 8  | -0.01 | -0.01 | -0.01 | -0.01 | -0.01 | -0.01 | -0.05 | -0.05 | -0.04 |
| 16   | 6  | -0.03 | -0.10 | 0.00  | 0.00  | 0.02  | 0.01  | 0.00  | 0.00  | 0.00  |

|    |   |       |       |       |       |       |       |       |       |       |
|----|---|-------|-------|-------|-------|-------|-------|-------|-------|-------|
| 17 | 1 | -0.12 | 0.22  | -0.03 | -0.01 | -0.05 | -0.03 | 0.01  | -0.01 | 0.01  |
| 18 | 1 | -0.10 | 0.18  | -0.19 | 0.06  | -0.04 | 0.05  | 0.00  | -0.01 | 0.01  |
| 19 | 1 | 0.31  | 0.00  | 0.23  | -0.05 | -0.01 | -0.08 | -0.01 | 0.00  | 0.00  |
| 20 | 6 | 0.01  | 0.03  | 0.07  | 0.01  | 0.02  | -0.01 | 0.00  | 0.01  | 0.01  |
| 21 | 1 | 0.02  | 0.01  | 0.05  | -0.02 | 0.09  | 0.03  | 0.03  | -0.02 | -0.02 |
| 22 | 6 | 0.03  | 0.04  | 0.00  | 0.00  | 0.01  | -0.01 | 0.00  | -0.01 | -0.01 |
| 23 | 1 | -0.04 | -0.13 | 0.01  | -0.01 | -0.02 | 0.01  | 0.01  | 0.01  | 0.02  |
| 24 | 1 | -0.02 | -0.10 | 0.13  | -0.02 | 0.00  | 0.01  | -0.02 | 0.02  | -0.02 |
| 25 | 1 | -0.09 | 0.06  | -0.13 | -0.02 | 0.01  | -0.02 | 0.00  | 0.01  | 0.02  |
| 26 | 6 | 0.00  | 0.00  | -0.02 | 0.02  | 0.01  | -0.05 | 0.03  | 0.00  | -0.01 |
| 27 | 1 | -0.08 | 0.03  | 0.01  | -0.06 | -0.09 | 0.05  | -0.12 | 0.16  | 0.01  |
| 28 | 1 | 0.06  | -0.02 | 0.01  | 0.10  | 0.05  | 0.01  | 0.12  | -0.08 | 0.00  |
| 29 | 6 | -0.07 | -0.07 | -0.01 | 0.01  | 0.00  | 0.01  | 0.01  | 0.01  | 0.01  |
| 30 | 1 | 0.22  | -0.18 | -0.25 | -0.03 | 0.03  | 0.04  | -0.04 | 0.05  | 0.05  |
| 31 | 1 | -0.05 | -0.07 | 0.32  | -0.01 | 0.04  | -0.01 | 0.03  | -0.06 | -0.08 |
| 32 | 6 | 0.03  | 0.00  | 0.01  | -0.02 | 0.00  | 0.01  | 0.00  | -0.01 | -0.01 |
| 33 | 1 | 0.02  | 0.05  | 0.00  | -0.01 | 0.00  | 0.02  | -0.02 | -0.05 | -0.03 |
| 34 | 6 | 0.00  | -0.04 | -0.05 | 0.01  | 0.00  | -0.01 | 0.00  | 0.01  | 0.00  |
| 35 | 1 | -0.25 | -0.19 | 0.07  | 0.13  | 0.09  | -0.08 | 0.06  | 0.05  | -0.03 |
| 36 | 6 | 0.01  | 0.00  | -0.01 | 0.03  | -0.01 | -0.01 | -0.05 | -0.02 | 0.00  |
| 37 | 1 | -0.03 | -0.01 | -0.02 | -0.06 | -0.01 | -0.05 | 0.13  | 0.05  | -0.01 |
| 38 | 1 | -0.04 | 0.02  | -0.03 | -0.06 | 0.05  | 0.01  | 0.12  | -0.05 | 0.13  |
| 39 | 1 | 0.00  | 0.00  | 0.05  | 0.01  | 0.01  | 0.12  | -0.02 | 0.07  | -0.18 |
| 40 | 6 | 0.01  | -0.01 | 0.03  | -0.03 | -0.07 | 0.08  | -0.06 | -0.02 | 0.00  |
| 41 | 1 | 0.09  | 0.10  | -0.05 | 0.24  | 0.58  | -0.51 | -0.04 | 0.11  | -0.13 |
| 42 | 6 | 0.00  | -0.01 | -0.01 | 0.03  | -0.02 | -0.03 | -0.02 | 0.01  | -0.01 |
| 43 | 1 | 0.01  | 0.03  | -0.04 | -0.05 | 0.09  | -0.01 | 0.04  | -0.01 | -0.05 |
| 44 | 1 | 0.01  | 0.00  | 0.03  | -0.07 | -0.02 | 0.08  | 0.06  | 0.01  | -0.03 |
| 45 | 1 | 0.01  | 0.02  | 0.01  | 0.03  | 0.11  | -0.15 | 0.00  | -0.02 | 0.09  |
| 46 | 6 | 0.00  | -0.01 | 0.00  | 0.00  | -0.04 | -0.02 | -0.06 | 0.00  | 0.06  |
| 47 | 1 | 0.00  | -0.03 | 0.03  | 0.03  | -0.12 | 0.07  | 0.08  | -0.04 | -0.01 |
| 48 | 6 | 0.00  | 0.00  | 0.00  | -0.01 | 0.01  | 0.01  | 0.04  | 0.00  | -0.03 |
| 49 | 1 | 0.05  | 0.02  | 0.04  | 0.02  | 0.03  | 0.03  | 0.31  | 0.07  | 0.26  |
| 50 | 1 | -0.04 | -0.03 | -0.04 | -0.02 | -0.06 | -0.06 | -0.38 | -0.19 | -0.30 |
| 51 | 6 | 0.01  | 0.00  | -0.01 | 0.04  | -0.01 | -0.02 | 0.01  | 0.06  | -0.02 |
| 52 | 1 | 0.00  | -0.01 | -0.03 | -0.04 | -0.01 | -0.05 | -0.08 | -0.15 | -0.24 |
| 53 | 6 | 0.00  | 0.00  | 0.00  | 0.00  | -0.01 | 0.00  | 0.00  | -0.03 | 0.01  |
| 54 | 1 | 0.03  | 0.01  | 0.03  | 0.02  | 0.00  | 0.02  | 0.09  | 0.00  | 0.09  |
| 55 | 6 | 0.00  | 0.01  | 0.00  | 0.00  | 0.01  | 0.00  | -0.01 | 0.04  | -0.01 |
| 56 | 1 | 0.00  | 0.03  | -0.01 | -0.01 | 0.03  | -0.01 | -0.06 | 0.23  | -0.10 |
| 57 | 6 | 0.01  | 0.00  | 0.01  | 0.01  | 0.00  | 0.01  | 0.05  | -0.01 | 0.05  |
| 58 | 1 | 0.00  | 0.01  | 0.00  | -0.01 | 0.00  | 0.00  | 0.06  | -0.01 | 0.06  |
| 59 | 8 | 0.00  | 0.01  | -0.01 | 0.00  | 0.05  | -0.01 | 0.01  | 0.00  | 0.02  |
| 60 | 8 | 0.01  | 0.00  | 0.02  | 0.00  | 0.00  | 0.00  | 0.01  | 0.01  | 0.01  |
| 61 | 8 | 0.01  | 0.00  | 0.00  | 0.00  | 0.01  | -0.01 | 0.02  | 0.01  | 0.00  |
| 62 | 6 | 0.00  | 0.00  | 0.00  | 0.00  | 0.00  | 0.00  | -0.01 | 0.00  | 0.00  |
| 63 | 6 | 0.00  | 0.00  | 0.00  | 0.00  | 0.01  | 0.01  | 0.00  | -0.02 | -0.01 |
| 64 | 6 | 0.00  | 0.00  | 0.00  | 0.00  | 0.00  | 0.00  | -0.01 | 0.01  | 0.01  |
| 65 | 8 | 0.00  | 0.00  | 0.00  | 0.00  | 0.00  | 0.00  | 0.00  | 0.00  | 0.00  |
| 66 | 1 | 0.00  | 0.01  | 0.00  | 0.00  | -0.01 | 0.00  | 0.01  | 0.04  | 0.01  |
| 67 | 6 | 0.00  | 0.00  | 0.00  | 0.00  | 0.00  | 0.00  | 0.01  | 0.00  | -0.01 |
| 68 | 1 | 0.00  | -0.01 | 0.00  | 0.00  | 0.02  | 0.00  | -0.01 | -0.05 | -0.01 |

|                |    |           |       |       |           |       |       |           |       |       |
|----------------|----|-----------|-------|-------|-----------|-------|-------|-----------|-------|-------|
| 69             | 1  | 0.00      | 0.00  | 0.00  | 0.00      | 0.00  | -0.01 | 0.00      | 0.00  | 0.02  |
| 70             | 1  | 0.00      | 0.00  | 0.00  | 0.00      | 0.00  | 0.00  | -0.01     | 0.01  | 0.01  |
| 71             | 6  | 0.00      | 0.00  | 0.00  | 0.00      | 0.00  | 0.00  | 0.00      | 0.01  | 0.01  |
| 72             | 1  | 0.00      | 0.00  | 0.00  | 0.00      | 0.00  | 0.01  | 0.01      | -0.01 | -0.02 |
| 73             | 1  | 0.00      | -0.01 | 0.00  | 0.00      | 0.00  | 0.00  | -0.02     | -0.02 | 0.01  |
| 74             | 1  | -0.01     | 0.00  | 0.00  | 0.01      | 0.00  | 0.00  | -0.04     | 0.00  | 0.02  |
|                |    | 127       |       |       | 128       |       |       | 129       |       |       |
|                |    | A         |       |       | A         |       |       | A         |       |       |
| Frequencies -- |    | 1220.0711 |       |       | 1237.0891 |       |       | 1245.9092 |       |       |
| Red. masses -- |    | 1.9851    |       |       | 1.5655    |       |       | 2.7884    |       |       |
| Frc consts --  |    | 1.7410    |       |       | 1.4116    |       |       | 2.5503    |       |       |
| IR Inten --    |    | 14.9312   |       |       | 12.8957   |       |       | 177.9705  |       |       |
| Raman Activ -- |    | 3.1637    |       |       | 8.0876    |       |       | 5.7457    |       |       |
| Depolar (P) -- |    | 0.5569    |       |       | 0.5100    |       |       | 0.4001    |       |       |
| Depolar (U) -- |    | 0.7154    |       |       | 0.6755    |       |       | 0.5715    |       |       |
| Atom           | AN | X         | Y     | Z     | X         | Y     | Z     | X         | Y     | Z     |
| 1              | 6  | 0.00      | -0.01 | 0.00  | 0.02      | 0.01  | -0.06 | -0.01     | 0.04  | 0.01  |
| 2              | 6  | -0.01     | 0.00  | 0.01  | -0.01     | 0.00  | 0.03  | 0.02      | -0.01 | -0.03 |
| 3              | 6  | 0.02      | 0.00  | 0.00  | -0.01     | 0.02  | 0.02  | 0.01      | 0.01  | 0.00  |
| 4              | 6  | 0.08      | 0.05  | 0.01  | 0.02      | -0.02 | -0.02 | 0.04      | 0.00  | 0.01  |
| 5              | 6  | -0.09     | -0.06 | -0.06 | 0.01      | -0.01 | -0.01 | -0.01     | -0.01 | -0.01 |
| 6              | 6  | 0.08      | 0.11  | 0.00  | 0.00      | 0.00  | -0.01 | 0.00      | -0.01 | -0.01 |
| 7              | 8  | 0.00      | 0.00  | 0.00  | 0.00      | 0.00  | 0.00  | -0.01     | -0.01 | 0.00  |
| 8              | 6  | 0.00      | -0.02 | -0.01 | -0.02     | -0.07 | -0.10 | -0.01     | -0.02 | -0.06 |
| 9              | 6  | 0.00      | -0.01 | -0.01 | 0.00      | -0.04 | -0.04 | 0.01      | -0.03 | -0.01 |
| 10             | 1  | 0.02      | -0.02 | -0.02 | 0.07      | -0.02 | -0.08 | -0.04     | -0.03 | 0.01  |
| 11             | 8  | 0.00      | 0.00  | 0.00  | 0.03      | 0.04  | 0.02  | 0.02      | 0.03  | 0.00  |
| 12             | 6  | -0.03     | -0.02 | 0.00  | -0.03     | 0.02  | 0.01  | -0.03     | 0.00  | -0.01 |
| 13             | 1  | 0.01      | 0.00  | -0.03 | 0.11      | 0.01  | 0.03  | -0.07     | 0.06  | -0.09 |
| 14             | 6  | -0.04     | -0.07 | -0.06 | 0.01      | 0.02  | 0.01  | -0.01     | -0.01 | -0.01 |
| 15             | 8  | 0.04      | 0.03  | 0.04  | -0.01     | 0.00  | -0.01 | 0.00      | 0.00  | 0.00  |
| 16             | 6  | 0.00      | 0.01  | 0.00  | 0.01      | 0.04  | 0.03  | 0.00      | 0.02  | 0.02  |
| 17             | 1  | 0.00      | -0.01 | 0.00  | -0.01     | -0.09 | -0.05 | -0.01     | -0.04 | -0.03 |
| 18             | 1  | 0.01      | -0.01 | 0.01  | 0.12      | -0.06 | 0.09  | 0.06      | -0.02 | 0.04  |
| 19             | 1  | -0.01     | 0.00  | -0.02 | -0.06     | -0.02 | -0.12 | -0.02     | -0.01 | -0.06 |
| 20             | 6  | 0.00      | 0.02  | 0.01  | 0.01      | 0.00  | 0.05  | 0.00      | -0.01 | 0.01  |
| 21             | 1  | -0.01     | 0.03  | 0.02  | -0.17     | 0.07  | 0.21  | -0.08     | -0.01 | 0.07  |
| 22             | 6  | 0.00      | 0.00  | 0.00  | -0.01     | 0.00  | 0.02  | 0.00      | -0.01 | 0.00  |
| 23             | 1  | -0.01     | 0.00  | -0.01 | -0.02     | 0.03  | -0.05 | 0.03      | 0.01  | 0.03  |
| 24             | 1  | 0.00      | 0.00  | 0.00  | 0.06      | -0.02 | 0.02  | -0.01     | 0.02  | -0.02 |
| 25             | 1  | 0.00      | 0.00  | -0.01 | 0.02      | -0.03 | -0.02 | 0.00      | 0.01  | 0.03  |
| 26             | 6  | 0.03      | -0.05 | -0.02 | 0.00      | 0.00  | 0.01  | 0.01      | 0.00  | 0.00  |
| 27             | 1  | -0.22     | 0.19  | 0.02  | 0.00      | 0.01  | 0.00  | -0.03     | 0.05  | 0.00  |
| 28             | 1  | 0.30      | -0.31 | 0.01  | -0.01     | 0.00  | 0.00  | 0.03      | -0.04 | 0.00  |
| 29             | 6  | 0.00      | 0.00  | 0.00  | -0.01     | -0.03 | 0.00  | -0.01     | -0.02 | 0.00  |
| 30             | 1  | 0.01      | 0.00  | 0.00  | 0.19      | -0.30 | -0.22 | 0.11      | -0.17 | -0.12 |
| 31             | 1  | -0.01     | 0.03  | 0.02  | -0.23     | 0.51  | 0.38  | -0.12     | 0.26  | 0.21  |
| 32             | 6  | 0.00      | 0.00  | 0.00  | -0.01     | 0.00  | 0.02  | 0.00      | 0.01  | 0.01  |
| 33             | 1  | -0.01     | -0.02 | -0.01 | 0.07      | 0.19  | 0.13  | 0.07      | 0.17  | 0.10  |
| 34             | 6  | 0.01      | 0.00  | 0.00  | 0.00      | 0.01  | 0.01  | -0.01     | 0.00  | 0.02  |
| 35             | 1  | 0.07      | 0.05  | -0.04 | 0.07      | 0.07  | -0.04 | -0.10     | -0.06 | 0.07  |
| 36             | 6  | -0.02     | -0.02 | 0.00  | -0.01     | 0.01  | 0.01  | -0.02     | -0.01 | 0.00  |

|    |   |       |       |       |       |       |       |       |       |       |
|----|---|-------|-------|-------|-------|-------|-------|-------|-------|-------|
| 37 | 1 | 0.05  | 0.04  | -0.06 | 0.01  | 0.00  | 0.03  | 0.04  | 0.02  | -0.02 |
| 38 | 1 | 0.04  | -0.01 | 0.09  | 0.01  | -0.02 | -0.02 | 0.04  | -0.02 | 0.03  |
| 39 | 1 | 0.00  | 0.06  | -0.06 | 0.00  | -0.02 | -0.04 | -0.01 | 0.02  | -0.06 |
| 40 | 6 | -0.08 | -0.01 | 0.03  | 0.00  | 0.00  | -0.01 | -0.02 | -0.01 | 0.00  |
| 41 | 1 | 0.02  | 0.14  | -0.10 | 0.00  | -0.06 | 0.06  | -0.03 | 0.01  | -0.03 |
| 42 | 6 | -0.03 | -0.03 | -0.01 | 0.00  | 0.00  | 0.00  | 0.00  | 0.01  | 0.01  |
| 43 | 1 | 0.03  | 0.06  | -0.10 | 0.00  | -0.01 | 0.01  | 0.02  | 0.00  | -0.01 |
| 44 | 1 | 0.05  | -0.02 | 0.13  | 0.00  | 0.00  | -0.01 | -0.01 | 0.00  | -0.03 |
| 45 | 1 | 0.03  | 0.05  | 0.13  | 0.00  | 0.00  | -0.01 | -0.01 | -0.03 | 0.00  |
| 46 | 6 | 0.04  | 0.03  | -0.02 | -0.01 | 0.01  | 0.01  | 0.00  | 0.01  | 0.01  |
| 47 | 1 | -0.16 | 0.03  | 0.15  | -0.02 | 0.07  | -0.05 | -0.01 | 0.05  | -0.04 |
| 48 | 6 | 0.00  | -0.02 | -0.01 | 0.01  | 0.01  | 0.00  | 0.00  | 0.00  | 0.00  |
| 49 | 1 | -0.10 | -0.07 | -0.10 | 0.01  | 0.00  | 0.00  | 0.03  | 0.02  | 0.02  |
| 50 | 1 | 0.20  | 0.13  | 0.19  | -0.03 | 0.01  | -0.01 | -0.04 | -0.03 | -0.03 |
| 51 | 6 | -0.05 | -0.01 | 0.02  | 0.00  | 0.00  | 0.00  | 0.00  | 0.01  | 0.00  |
| 52 | 1 | 0.37  | 0.01  | 0.23  | -0.05 | -0.03 | -0.04 | 0.06  | 0.00  | 0.02  |
| 53 | 6 | -0.01 | 0.05  | -0.01 | 0.00  | -0.01 | 0.00  | 0.00  | 0.00  | 0.00  |
| 54 | 1 | 0.00  | 0.05  | -0.03 | -0.01 | -0.01 | -0.01 | 0.02  | 0.01  | 0.02  |
| 55 | 6 | 0.01  | -0.02 | 0.01  | 0.00  | 0.00  | 0.00  | 0.00  | 0.00  | 0.00  |
| 56 | 1 | 0.09  | -0.32 | 0.15  | -0.02 | 0.06  | -0.03 | 0.02  | -0.06 | 0.03  |
| 57 | 6 | -0.03 | 0.03  | -0.03 | 0.00  | -0.01 | 0.00  | 0.00  | 0.00  | 0.00  |
| 58 | 1 | -0.08 | 0.04  | -0.10 | 0.02  | -0.01 | 0.03  | -0.03 | 0.01  | -0.03 |
| 59 | 8 | 0.01  | 0.00  | 0.01  | 0.00  | -0.01 | 0.00  | 0.00  | 0.00  | 0.01  |
| 60 | 8 | 0.01  | 0.00  | 0.00  | 0.00  | -0.01 | 0.00  | 0.02  | 0.05  | 0.00  |
| 61 | 8 | 0.00  | 0.00  | 0.02  | 0.00  | -0.01 | 0.00  | 0.00  | -0.01 | 0.00  |
| 62 | 6 | 0.00  | 0.01  | 0.00  | 0.01  | 0.04  | 0.00  | -0.05 | -0.20 | 0.01  |
| 63 | 6 | 0.00  | -0.02 | -0.02 | 0.01  | -0.06 | -0.04 | -0.01 | 0.21  | 0.15  |
| 64 | 6 | -0.01 | 0.00  | 0.01  | -0.01 | 0.00  | 0.02  | 0.05  | 0.01  | -0.06 |
| 65 | 8 | 0.00  | 0.00  | 0.00  | 0.00  | 0.00  | 0.02  | 0.01  | 0.02  | -0.05 |
| 66 | 1 | 0.01  | 0.04  | 0.01  | 0.03  | 0.11  | 0.02  | -0.12 | -0.39 | -0.07 |
| 67 | 6 | 0.01  | 0.00  | -0.01 | 0.02  | 0.00  | -0.02 | -0.06 | -0.02 | 0.06  |
| 68 | 1 | -0.01 | -0.04 | -0.01 | -0.03 | -0.09 | -0.02 | 0.09  | 0.30  | 0.08  |
| 69 | 1 | 0.00  | 0.00  | 0.02  | 0.00  | 0.01  | 0.04  | 0.01  | -0.03 | -0.16 |
| 70 | 1 | -0.01 | 0.01  | 0.01  | -0.03 | 0.04  | 0.02  | 0.09  | -0.13 | -0.08 |
| 71 | 6 | 0.00  | 0.01  | 0.01  | 0.00  | 0.02  | 0.01  | 0.01  | -0.09 | -0.06 |
| 72 | 1 | 0.01  | -0.01 | -0.01 | 0.04  | -0.02 | -0.02 | -0.14 | 0.09  | 0.10  |
| 73 | 1 | -0.02 | -0.02 | 0.01  | -0.03 | -0.05 | 0.01  | 0.11  | 0.20  | -0.05 |
| 74 | 1 | -0.03 | 0.00  | 0.02  | -0.07 | 0.00  | 0.04  | 0.26  | 0.01  | -0.14 |

|    |   |       |       |       |       |       |       |       |       |       |
|----|---|-------|-------|-------|-------|-------|-------|-------|-------|-------|
| 5  | 6 | 0.00  | -0.02 | -0.01 | 0.00  | 0.00  | 0.01  | 0.02  | -0.01 | -0.01 |
| 6  | 6 | 0.03  | 0.10  | -0.03 | 0.00  | 0.01  | 0.00  | -0.01 | 0.00  | 0.00  |
| 7  | 8 | 0.00  | 0.00  | 0.00  | 0.02  | 0.01  | -0.03 | 0.00  | -0.01 | -0.01 |
| 8  | 6 | 0.00  | 0.01  | 0.01  | 0.00  | -0.01 | 0.05  | -0.07 | 0.10  | 0.10  |
| 9  | 6 | 0.01  | 0.00  | 0.00  | 0.00  | 0.00  | -0.04 | 0.05  | -0.02 | -0.01 |
| 10 | 1 | -0.01 | 0.05  | 0.02  | 0.08  | -0.21 | -0.12 | 0.06  | 0.51  | 0.08  |
| 11 | 8 | 0.00  | 0.00  | 0.00  | 0.00  | 0.00  | -0.01 | 0.00  | 0.00  | 0.05  |
| 12 | 6 | -0.01 | -0.01 | 0.00  | 0.00  | 0.00  | -0.01 | -0.03 | 0.00  | 0.02  |
| 13 | 1 | 0.03  | 0.02  | -0.02 | -0.05 | -0.01 | -0.01 | 0.05  | 0.04  | -0.01 |
| 14 | 6 | 0.05  | 0.11  | 0.04  | 0.00  | 0.01  | 0.00  | 0.00  | 0.00  | 0.00  |
| 15 | 8 | -0.03 | -0.03 | -0.03 | 0.00  | 0.00  | 0.00  | 0.00  | 0.00  | 0.00  |
| 16 | 6 | 0.00  | 0.00  | 0.00  | 0.00  | 0.00  | -0.02 | 0.03  | -0.02 | -0.04 |
| 17 | 1 | 0.00  | 0.01  | 0.00  | 0.04  | 0.00  | 0.05  | 0.10  | 0.05  | 0.11  |
| 18 | 1 | -0.01 | 0.00  | -0.01 | -0.04 | -0.01 | -0.01 | -0.15 | 0.01  | -0.05 |
| 19 | 1 | 0.00  | 0.00  | 0.01  | 0.00  | 0.01  | 0.04  | -0.02 | 0.03  | 0.15  |
| 20 | 6 | 0.00  | 0.00  | -0.01 | -0.03 | 0.03  | 0.08  | -0.04 | -0.17 | -0.03 |
| 21 | 1 | 0.00  | 0.00  | -0.01 | 0.02  | 0.06  | 0.05  | -0.11 | -0.17 | 0.01  |
| 22 | 6 | 0.00  | 0.00  | 0.00  | -0.02 | 0.02  | 0.05  | -0.01 | -0.06 | 0.03  |
| 23 | 1 | 0.01  | 0.00  | 0.01  | -0.09 | 0.05  | -0.18 | 0.07  | 0.14  | -0.01 |
| 24 | 1 | -0.01 | 0.01  | -0.01 | 0.15  | -0.06 | 0.06  | 0.04  | 0.13  | -0.13 |
| 25 | 1 | 0.00  | 0.01  | 0.01  | 0.04  | -0.09 | -0.10 | 0.04  | -0.06 | 0.10  |
| 26 | 6 | 0.00  | -0.03 | 0.00  | -0.01 | 0.00  | 0.00  | 0.02  | 0.00  | 0.00  |
| 27 | 1 | -0.05 | 0.04  | -0.01 | -0.01 | 0.01  | 0.00  | 0.01  | -0.01 | 0.01  |
| 28 | 1 | 0.11  | -0.17 | 0.00  | -0.03 | 0.03  | 0.00  | 0.02  | -0.02 | -0.01 |
| 29 | 6 | 0.00  | 0.00  | 0.00  | 0.00  | 0.01  | 0.00  | 0.01  | 0.01  | -0.03 |
| 30 | 1 | 0.00  | 0.00  | 0.00  | -0.04 | 0.08  | 0.05  | 0.17  | -0.33 | -0.24 |
| 31 | 1 | 0.01  | -0.02 | -0.01 | 0.03  | -0.07 | -0.05 | 0.00  | 0.04  | 0.06  |
| 32 | 6 | 0.00  | 0.00  | 0.00  | -0.01 | -0.04 | -0.02 | 0.02  | -0.01 | -0.02 |
| 33 | 1 | 0.00  | 0.01  | 0.00  | -0.14 | -0.31 | -0.18 | -0.10 | -0.26 | -0.17 |
| 34 | 6 | 0.00  | 0.00  | 0.00  | 0.04  | 0.00  | -0.06 | 0.00  | 0.00  | -0.02 |
| 35 | 1 | -0.04 | -0.03 | 0.03  | 0.50  | 0.35  | -0.35 | 0.04  | 0.04  | -0.06 |
| 36 | 6 | 0.00  | 0.00  | 0.00  | 0.00  | 0.00  | 0.00  | 0.00  | 0.00  | 0.00  |
| 37 | 1 | -0.01 | 0.01  | -0.02 | -0.01 | 0.00  | -0.01 | -0.01 | 0.00  | -0.01 |
| 38 | 1 | -0.01 | 0.00  | 0.00  | -0.01 | 0.00  | 0.00  | -0.01 | 0.00  | 0.00  |
| 39 | 1 | 0.00  | 0.01  | 0.01  | 0.00  | 0.00  | 0.00  | 0.00  | 0.00  | 0.00  |
| 40 | 6 | -0.02 | 0.00  | 0.01  | 0.03  | 0.01  | 0.00  | -0.04 | -0.03 | -0.01 |
| 41 | 1 | 0.02  | 0.02  | 0.01  | 0.06  | -0.08 | 0.11  | -0.09 | 0.12  | -0.19 |
| 42 | 6 | 0.00  | -0.03 | 0.01  | 0.00  | 0.00  | 0.00  | 0.00  | 0.00  | 0.00  |
| 43 | 1 | -0.03 | 0.03  | 0.00  | 0.00  | 0.01  | -0.01 | 0.00  | 0.00  | 0.01  |
| 44 | 1 | -0.01 | -0.02 | 0.10  | -0.01 | 0.00  | 0.01  | -0.01 | 0.00  | -0.01 |
| 45 | 1 | 0.02  | 0.05  | 0.03  | 0.00  | 0.00  | -0.01 | 0.00  | 0.00  | -0.01 |
| 46 | 6 | 0.02  | 0.00  | -0.04 | 0.00  | 0.00  | -0.01 | 0.00  | 0.00  | 0.01  |
| 47 | 1 | -0.07 | -0.02 | 0.08  | 0.01  | -0.03 | 0.02  | -0.05 | 0.10  | -0.07 |
| 48 | 6 | 0.02  | 0.03  | -0.01 | 0.00  | 0.00  | 0.00  | 0.00  | 0.01  | 0.00  |
| 49 | 1 | -0.22 | -0.17 | -0.21 | -0.02 | -0.01 | -0.02 | 0.01  | 0.01  | 0.01  |
| 50 | 1 | 0.16  | 0.20  | 0.20  | 0.03  | 0.02  | 0.02  | -0.03 | -0.01 | -0.02 |
| 51 | 6 | -0.04 | -0.05 | 0.02  | 0.00  | -0.01 | 0.00  | 0.00  | 0.00  | 0.00  |
| 52 | 1 | -0.17 | -0.19 | -0.15 | -0.03 | 0.00  | -0.01 | 0.00  | -0.01 | -0.02 |
| 53 | 6 | 0.02  | -0.02 | 0.03  | 0.00  | 0.00  | 0.00  | 0.00  | 0.00  | 0.00  |
| 54 | 1 | -0.17 | -0.10 | -0.15 | -0.02 | -0.01 | -0.01 | 0.01  | 0.00  | 0.01  |
| 55 | 6 | 0.00  | -0.02 | 0.00  | 0.00  | 0.00  | 0.00  | 0.00  | 0.00  | 0.00  |
| 56 | 1 | -0.13 | 0.48  | -0.22 | -0.01 | 0.05  | -0.02 | 0.00  | -0.01 | 0.01  |

|    |   |       |       |       |       |       |       |       |       |       |
|----|---|-------|-------|-------|-------|-------|-------|-------|-------|-------|
| 57 | 6 | -0.01 | -0.03 | 0.00  | 0.00  | 0.00  | 0.00  | 0.00  | 0.00  | 0.00  |
| 58 | 1 | 0.30  | -0.10 | 0.32  | 0.03  | -0.01 | 0.03  | -0.02 | 0.01  | -0.03 |
| 59 | 8 | 0.00  | 0.00  | 0.00  | -0.01 | 0.00  | -0.02 | -0.01 | 0.00  | 0.03  |
| 60 | 8 | 0.00  | 0.00  | 0.00  | 0.01  | 0.01  | 0.00  | 0.00  | 0.00  | 0.00  |
| 61 | 8 | 0.00  | 0.00  | 0.01  | 0.00  | 0.00  | 0.00  | 0.00  | -0.01 | 0.00  |
| 62 | 6 | 0.00  | -0.01 | 0.00  | -0.01 | -0.05 | 0.00  | 0.00  | 0.01  | 0.00  |
| 63 | 6 | 0.00  | 0.01  | 0.01  | 0.00  | 0.05  | 0.03  | 0.00  | -0.01 | 0.00  |
| 64 | 6 | 0.00  | 0.00  | 0.00  | 0.01  | 0.00  | -0.01 | 0.00  | 0.00  | 0.00  |
| 65 | 8 | 0.00  | 0.00  | 0.00  | 0.00  | 0.00  | -0.01 | 0.00  | 0.00  | 0.00  |
| 66 | 1 | -0.01 | -0.03 | 0.00  | -0.03 | -0.08 | -0.01 | 0.00  | 0.01  | 0.00  |
| 67 | 6 | 0.00  | 0.00  | 0.00  | -0.01 | -0.01 | 0.01  | 0.00  | 0.00  | 0.00  |
| 68 | 1 | 0.01  | 0.02  | 0.01  | 0.02  | 0.06  | 0.02  | 0.00  | 0.00  | 0.00  |
| 69 | 1 | 0.00  | 0.00  | -0.01 | 0.00  | -0.01 | -0.03 | 0.00  | 0.00  | 0.00  |
| 70 | 1 | 0.01  | -0.01 | -0.01 | 0.02  | -0.03 | -0.02 | 0.00  | 0.00  | 0.00  |
| 71 | 6 | 0.00  | -0.01 | 0.00  | 0.00  | -0.02 | -0.01 | 0.00  | 0.00  | 0.00  |
| 72 | 1 | -0.01 | 0.00  | 0.01  | -0.03 | 0.02  | 0.02  | 0.00  | 0.00  | 0.00  |
| 73 | 1 | 0.00  | 0.01  | 0.00  | 0.02  | 0.04  | -0.01 | 0.00  | 0.00  | 0.00  |
| 74 | 1 | 0.02  | 0.00  | -0.01 | 0.05  | 0.00  | -0.03 | 0.00  | 0.00  | 0.00  |

133

134

135

A

A

A

|                |           |           |           |
|----------------|-----------|-----------|-----------|
| Frequencies -- | 1273.4643 | 1278.2074 | 1287.5288 |
| Red. masses -- | 1.5476    | 1.6326    | 2.7010    |
| Frc consts --  | 1.4788    | 1.5715    | 2.6381    |
| IR Inten --    | 3.1680    | 1.4763    | 3.5398    |
| Raman Activ -- | 10.1375   | 18.6173   | 9.2178    |
| Depolar (P) -- | 0.1818    | 0.3030    | 0.3197    |
| Depolar (U) -- | 0.3077    | 0.4651    | 0.4845    |

| Atom | AN | X     | Y     | Z     | X     | Y     | Z     | X     | Y     | Z     |
|------|----|-------|-------|-------|-------|-------|-------|-------|-------|-------|
| 1    | 6  | 0.01  | -0.07 | 0.03  | 0.00  | -0.01 | 0.01  | 0.05  | 0.12  | -0.10 |
| 2    | 6  | 0.00  | 0.00  | 0.00  | 0.00  | 0.00  | 0.00  | -0.01 | 0.00  | 0.03  |
| 3    | 6  | -0.01 | 0.03  | 0.01  | -0.01 | 0.01  | 0.00  | 0.01  | -0.01 | 0.01  |
| 4    | 6  | -0.01 | 0.00  | -0.02 | 0.00  | 0.00  | -0.01 | -0.01 | 0.01  | 0.00  |
| 5    | 6  | 0.07  | -0.06 | -0.04 | 0.02  | -0.01 | -0.01 | 0.01  | -0.01 | 0.00  |
| 6    | 6  | -0.02 | -0.04 | -0.04 | -0.02 | -0.04 | 0.01  | -0.01 | -0.01 | -0.01 |
| 7    | 8  | 0.00  | 0.00  | 0.00  | 0.00  | 0.00  | 0.00  | 0.00  | -0.02 | -0.01 |
| 8    | 6  | 0.03  | -0.01 | 0.03  | 0.00  | 0.00  | 0.01  | 0.25  | -0.02 | -0.09 |
| 9    | 6  | 0.03  | -0.03 | -0.03 | 0.01  | -0.01 | -0.01 | 0.00  | -0.01 | -0.02 |
| 10   | 1  | 0.02  | 0.23  | 0.02  | 0.01  | 0.07  | 0.01  | 0.08  | 0.10  | -0.04 |
| 11   | 8  | -0.01 | -0.01 | 0.01  | 0.00  | 0.00  | 0.00  | -0.01 | 0.02  | 0.00  |
| 12   | 6  | -0.06 | 0.00  | 0.02  | -0.02 | 0.00  | 0.01  | 0.01  | -0.01 | -0.01 |
| 13   | 1  | 0.33  | 0.08  | -0.02 | 0.09  | 0.02  | 0.00  | -0.08 | -0.03 | 0.00  |
| 14   | 6  | 0.03  | 0.00  | 0.03  | -0.10 | 0.00  | -0.11 | 0.00  | 0.00  | 0.00  |
| 15   | 8  | -0.01 | 0.02  | -0.01 | 0.02  | -0.07 | 0.03  | 0.00  | 0.00  | 0.00  |
| 16   | 6  | 0.00  | 0.00  | -0.01 | 0.00  | 0.00  | 0.00  | -0.07 | -0.01 | 0.03  |
| 17   | 1  | 0.00  | 0.01  | 0.00  | 0.00  | 0.00  | 0.00  | -0.17 | 0.02  | -0.14 |
| 18   | 1  | -0.02 | 0.00  | -0.01 | -0.01 | 0.00  | 0.00  | 0.13  | 0.10  | -0.06 |
| 19   | 1  | -0.01 | 0.00  | 0.01  | 0.00  | 0.00  | 0.00  | 0.13  | -0.05 | -0.14 |
| 20   | 6  | -0.01 | 0.05  | -0.02 | 0.00  | 0.01  | -0.01 | -0.15 | -0.08 | 0.09  |
| 21   | 1  | -0.02 | 0.20  | 0.05  | -0.01 | 0.05  | 0.02  | -0.21 | -0.17 | 0.12  |
| 22   | 6  | 0.00  | 0.02  | -0.01 | 0.00  | 0.00  | 0.00  | -0.01 | -0.03 | 0.04  |
| 23   | 1  | -0.03 | -0.03 | -0.02 | -0.01 | 0.00  | 0.00  | 0.02  | 0.11  | -0.05 |
| 24   | 1  | -0.01 | -0.02 | 0.02  | 0.00  | 0.00  | 0.00  | 0.10  | 0.05  | -0.06 |



|    |   |       |       |       |       |       |       |       |       |       |
|----|---|-------|-------|-------|-------|-------|-------|-------|-------|-------|
| 25 | 1 | 0.00  | 0.00  | -0.04 | 0.00  | 0.00  | -0.01 | 0.04  | -0.06 | 0.03  |
| 26 | 6 | 0.01  | 0.02  | 0.01  | 0.00  | 0.02  | 0.00  | 0.01  | 0.00  | 0.00  |
| 27 | 1 | -0.11 | 0.17  | 0.00  | 0.00  | 0.00  | 0.01  | -0.03 | 0.05  | 0.00  |
| 28 | 1 | 0.14  | -0.18 | -0.01 | -0.01 | 0.01  | -0.01 | 0.03  | -0.04 | 0.00  |
| 29 | 6 | -0.01 | 0.00  | 0.00  | 0.00  | 0.00  | 0.00  | -0.02 | -0.02 | 0.00  |
| 30 | 1 | -0.03 | 0.08  | 0.04  | 0.00  | 0.01  | 0.00  | -0.15 | 0.47  | 0.24  |
| 31 | 1 | 0.05  | -0.12 | -0.05 | 0.01  | -0.03 | -0.01 | 0.09  | -0.25 | -0.07 |
| 32 | 6 | 0.00  | 0.00  | 0.00  | 0.00  | 0.00  | 0.00  | -0.02 | 0.04  | 0.04  |
| 33 | 1 | -0.01 | -0.04 | -0.02 | -0.01 | -0.01 | -0.01 | 0.13  | 0.27  | 0.21  |
| 34 | 6 | 0.01  | 0.00  | -0.01 | 0.00  | 0.00  | 0.00  | -0.01 | -0.03 | -0.02 |
| 35 | 1 | -0.01 | -0.02 | 0.01  | 0.00  | 0.00  | 0.00  | -0.13 | -0.16 | 0.09  |
| 36 | 6 | 0.01  | 0.00  | 0.01  | 0.00  | 0.00  | 0.00  | 0.00  | -0.01 | 0.00  |
| 37 | 1 | -0.03 | 0.01  | -0.02 | 0.00  | 0.00  | 0.00  | -0.01 | 0.00  | -0.02 |
| 38 | 1 | -0.02 | -0.01 | -0.04 | 0.00  | 0.00  | -0.01 | -0.01 | 0.01  | 0.01  |
| 39 | 1 | 0.01  | -0.02 | -0.03 | 0.00  | -0.01 | -0.01 | 0.00  | 0.01  | 0.01  |
| 40 | 6 | -0.01 | -0.01 | 0.01  | 0.00  | -0.01 | 0.00  | -0.01 | -0.01 | 0.01  |
| 41 | 1 | -0.02 | 0.01  | -0.01 | -0.02 | 0.00  | -0.01 | 0.00  | 0.03  | -0.04 |
| 42 | 6 | 0.01  | 0.02  | 0.01  | 0.00  | 0.01  | 0.00  | 0.00  | 0.00  | 0.00  |
| 43 | 1 | 0.01  | -0.05 | 0.05  | 0.01  | -0.02 | 0.01  | 0.00  | -0.01 | 0.01  |
| 44 | 1 | -0.02 | 0.01  | -0.06 | 0.00  | 0.01  | -0.04 | -0.01 | 0.00  | -0.01 |
| 45 | 1 | -0.03 | -0.07 | -0.01 | -0.01 | -0.02 | -0.02 | -0.01 | -0.01 | -0.01 |
| 46 | 6 | 0.03  | 0.03  | 0.08  | -0.02 | 0.01  | 0.03  | 0.00  | 0.00  | 0.01  |
| 47 | 1 | -0.31 | 0.55  | -0.34 | -0.03 | 0.12  | -0.11 | -0.02 | 0.05  | -0.03 |
| 48 | 6 | -0.01 | 0.03  | -0.01 | 0.00  | 0.00  | 0.00  | 0.00  | 0.00  | 0.00  |
| 49 | 1 | 0.02  | 0.07  | 0.02  | 0.09  | 0.05  | 0.09  | 0.00  | 0.00  | 0.00  |
| 50 | 1 | -0.07 | 0.06  | 0.00  | -0.15 | -0.11 | -0.14 | -0.01 | 0.00  | 0.00  |
| 51 | 6 | -0.01 | 0.00  | -0.01 | 0.06  | 0.01  | 0.05  | 0.00  | 0.00  | 0.00  |
| 52 | 1 | 0.00  | -0.13 | -0.11 | 0.28  | 0.07  | 0.20  | 0.03  | -0.02 | 0.00  |
| 53 | 6 | 0.00  | -0.02 | 0.00  | 0.00  | 0.06  | -0.01 | 0.00  | 0.00  | 0.00  |
| 54 | 1 | 0.02  | -0.01 | 0.02  | -0.11 | 0.03  | -0.11 | 0.00  | 0.00  | -0.01 |
| 55 | 6 | -0.01 | -0.01 | -0.01 | 0.03  | 0.01  | 0.03  | 0.00  | 0.00  | 0.00  |
| 56 | 1 | -0.01 | 0.00  | -0.01 | 0.02  | 0.08  | 0.01  | 0.00  | 0.01  | 0.00  |
| 57 | 6 | 0.01  | -0.01 | 0.02  | -0.06 | 0.03  | -0.06 | 0.00  | 0.00  | 0.00  |
| 58 | 1 | -0.13 | 0.03  | -0.14 | 0.56  | -0.11 | 0.59  | 0.01  | 0.00  | 0.01  |
| 59 | 8 | 0.01  | 0.00  | 0.00  | 0.00  | 0.00  | 0.00  | -0.01 | 0.00  | 0.00  |
| 60 | 8 | 0.01  | 0.00  | 0.00  | 0.00  | 0.00  | 0.00  | 0.00  | 0.00  | 0.00  |
| 61 | 8 | -0.02 | -0.03 | 0.00  | 0.00  | -0.01 | 0.00  | 0.00  | 0.00  | 0.00  |
| 62 | 6 | 0.00  | 0.00  | 0.00  | 0.00  | 0.00  | 0.00  | 0.00  | 0.01  | 0.00  |
| 63 | 6 | 0.00  | 0.00  | 0.00  | 0.00  | 0.00  | 0.00  | 0.00  | 0.00  | 0.00  |
| 64 | 6 | 0.00  | 0.00  | 0.00  | 0.00  | 0.00  | 0.00  | 0.00  | 0.00  | 0.00  |
| 65 | 8 | 0.00  | 0.00  | 0.00  | 0.00  | 0.00  | 0.00  | 0.00  | 0.00  | 0.00  |
| 66 | 1 | 0.00  | 0.00  | 0.00  | 0.00  | 0.00  | 0.00  | 0.01  | 0.01  | 0.00  |
| 67 | 6 | 0.00  | 0.00  | 0.00  | 0.00  | 0.00  | 0.00  | 0.00  | 0.00  | 0.00  |
| 68 | 1 | 0.00  | 0.00  | 0.00  | 0.00  | 0.00  | 0.00  | 0.00  | 0.00  | 0.00  |
| 69 | 1 | 0.00  | 0.00  | 0.00  | 0.00  | 0.00  | 0.00  | 0.00  | 0.00  | 0.00  |
| 70 | 1 | 0.00  | 0.00  | 0.00  | 0.00  | 0.00  | 0.00  | 0.00  | 0.00  | 0.00  |
| 71 | 6 | 0.00  | 0.00  | 0.00  | 0.00  | 0.00  | 0.00  | 0.00  | 0.00  | 0.00  |
| 72 | 1 | 0.00  | 0.00  | 0.00  | 0.00  | 0.00  | 0.00  | 0.00  | 0.00  | -0.01 |
| 73 | 1 | 0.02  | 0.01  | -0.01 | 0.00  | 0.00  | 0.00  | 0.00  | 0.00  | 0.00  |
| 74 | 1 | 0.01  | 0.00  | 0.00  | 0.00  | 0.00  | 0.00  | 0.00  | 0.00  | 0.00  |

136

A

137

A

138

A

|                |           |           |           |
|----------------|-----------|-----------|-----------|
| Frequencies -- | 1288.4675 | 1297.0244 | 1301.2149 |
| Red. masses -- | 1.7434    | 1.6726    | 1.7766    |
| Frc consts --  | 1.7053    | 1.6578    | 1.7723    |
| IR Inten --    | 3.5313    | 1.7948    | 4.1883    |
| Raman Activ -- | 1.5262    | 7.1956    | 6.2643    |
| Depolar (P) -- | 0.3928    | 0.6158    | 0.7267    |
| Depolar (U) -- | 0.5641    | 0.7622    | 0.8417    |

  

| Atom | AN | X     | Y     | Z     | X     | Y     | Z     | X     | Y     | Z     |
|------|----|-------|-------|-------|-------|-------|-------|-------|-------|-------|
| 1    | 6  | 0.03  | -0.03 | 0.03  | 0.00  | 0.01  | -0.01 | 0.00  | 0.01  | 0.00  |
| 2    | 6  | 0.00  | 0.00  | -0.01 | 0.00  | 0.00  | 0.00  | 0.00  | 0.00  | 0.00  |
| 3    | 6  | -0.04 | 0.03  | 0.00  | 0.00  | -0.01 | -0.01 | 0.00  | 0.01  | -0.01 |
| 4    | 6  | 0.08  | -0.05 | -0.02 | -0.03 | 0.04  | 0.02  | 0.02  | 0.03  | 0.02  |
| 5    | 6  | -0.05 | 0.02  | -0.02 | 0.03  | -0.07 | -0.07 | -0.05 | -0.05 | -0.06 |
| 6    | 6  | 0.02  | 0.06  | 0.06  | 0.01  | 0.08  | 0.07  | 0.00  | 0.07  | 0.12  |
| 7    | 8  | 0.00  | 0.00  | 0.00  | 0.00  | 0.00  | 0.00  | 0.00  | 0.00  | 0.00  |
| 8    | 6  | 0.05  | -0.01 | 0.03  | -0.01 | 0.00  | -0.01 | 0.00  | 0.00  | -0.01 |
| 9    | 6  | 0.05  | -0.06 | -0.06 | -0.02 | 0.03  | 0.02  | -0.01 | 0.01  | 0.01  |
| 10   | 1  | 0.04  | 0.42  | 0.03  | -0.01 | -0.14 | -0.01 | 0.00  | -0.07 | -0.01 |
| 11   | 8  | -0.01 | 0.00  | 0.02  | 0.00  | 0.00  | -0.01 | 0.00  | 0.00  | -0.01 |
| 12   | 6  | -0.11 | 0.01  | 0.03  | 0.04  | -0.02 | -0.01 | 0.01  | -0.02 | 0.00  |
| 13   | 1  | 0.41  | 0.15  | -0.05 | -0.13 | -0.03 | -0.01 | -0.05 | 0.01  | -0.03 |
| 14   | 6  | -0.02 | -0.01 | 0.00  | -0.05 | -0.01 | -0.02 | 0.01  | 0.01  | 0.03  |
| 15   | 8  | 0.00  | 0.00  | 0.00  | 0.01  | -0.01 | 0.01  | -0.01 | 0.00  | -0.01 |
| 16   | 6  | -0.01 | 0.00  | -0.01 | 0.00  | 0.00  | 0.00  | 0.00  | 0.00  | 0.00  |
| 17   | 1  | -0.01 | 0.00  | -0.01 | 0.00  | 0.00  | 0.00  | 0.00  | 0.00  | 0.00  |
| 18   | 1  | -0.03 | 0.01  | -0.02 | 0.01  | 0.00  | 0.00  | 0.01  | 0.00  | 0.00  |
| 19   | 1  | -0.01 | 0.00  | 0.00  | 0.01  | 0.00  | 0.00  | 0.01  | 0.00  | 0.00  |
| 20   | 6  | -0.03 | 0.03  | -0.02 | 0.00  | -0.01 | 0.01  | 0.00  | 0.00  | 0.00  |
| 21   | 1  | -0.11 | 0.25  | 0.12  | 0.04  | -0.11 | -0.06 | 0.02  | -0.06 | -0.03 |
| 22   | 6  | -0.01 | 0.00  | 0.00  | 0.00  | 0.00  | 0.00  | 0.00  | 0.00  | 0.00  |
| 23   | 1  | -0.01 | 0.01  | -0.02 | 0.01  | 0.00  | 0.01  | 0.01  | 0.01  | 0.00  |
| 24   | 1  | 0.00  | 0.02  | -0.02 | 0.00  | 0.00  | 0.00  | 0.00  | 0.00  | 0.00  |
| 25   | 1  | 0.00  | -0.01 | -0.02 | 0.00  | 0.00  | 0.01  | 0.00  | 0.00  | 0.01  |
| 26   | 6  | 0.00  | -0.03 | -0.01 | -0.01 | -0.02 | -0.01 | 0.01  | -0.03 | -0.02 |
| 27   | 1  | 0.14  | -0.19 | -0.01 | 0.12  | -0.18 | 0.00  | 0.18  | -0.28 | 0.01  |
| 28   | 1  | -0.19 | 0.25  | 0.02  | -0.11 | 0.15  | 0.02  | -0.24 | 0.34  | 0.02  |
| 29   | 6  | -0.01 | 0.01  | 0.00  | 0.00  | 0.00  | 0.00  | 0.00  | 0.00  | 0.00  |
| 30   | 1  | 0.00  | 0.04  | 0.00  | -0.01 | 0.01  | 0.02  | -0.01 | 0.02  | 0.01  |
| 31   | 1  | 0.06  | -0.15 | -0.05 | -0.02 | 0.05  | 0.01  | -0.01 | 0.02  | 0.01  |
| 32   | 6  | 0.00  | 0.01  | 0.00  | 0.00  | 0.00  | 0.00  | 0.00  | 0.00  | 0.00  |
| 33   | 1  | 0.00  | -0.02 | -0.01 | 0.01  | 0.01  | 0.01  | 0.01  | 0.01  | 0.01  |
| 34   | 6  | 0.00  | 0.00  | -0.01 | 0.00  | 0.00  | 0.00  | 0.00  | 0.00  | 0.00  |
| 35   | 1  | -0.05 | -0.05 | 0.03  | 0.01  | 0.01  | -0.01 | 0.00  | 0.00  | 0.00  |
| 36   | 6  | -0.02 | 0.01  | 0.01  | 0.01  | -0.01 | 0.00  | 0.00  | -0.01 | 0.00  |
| 37   | 1  | 0.05  | 0.02  | 0.04  | -0.04 | 0.00  | -0.05 | 0.01  | 0.02  | -0.04 |
| 38   | 1  | 0.04  | -0.05 | -0.05 | -0.04 | 0.02  | 0.00  | 0.00  | -0.01 | 0.00  |
| 39   | 1  | -0.01 | -0.02 | -0.10 | 0.01  | 0.01  | 0.03  | 0.00  | 0.02  | -0.01 |
| 40   | 6  | 0.01  | 0.02  | -0.03 | 0.01  | 0.01  | -0.01 | 0.00  | 0.01  | -0.04 |
| 41   | 1  | 0.05  | -0.15 | 0.17  | 0.02  | -0.03 | 0.03  | -0.07 | -0.06 | 0.00  |
| 42   | 6  | -0.01 | -0.03 | -0.02 | 0.00  | -0.03 | -0.02 | 0.00  | -0.03 | -0.04 |
| 43   | 1  | 0.00  | 0.06  | -0.06 | -0.03 | 0.06  | -0.04 | -0.03 | 0.08  | -0.06 |
| 44   | 1  | 0.03  | -0.02 | 0.09  | 0.03  | -0.02 | 0.10  | 0.02  | -0.02 | 0.11  |

|    |   |       |       |       |       |       |       |       |       |       |
|----|---|-------|-------|-------|-------|-------|-------|-------|-------|-------|
| 45 | 1 | 0.03  | 0.09  | 0.01  | 0.04  | 0.10  | 0.03  | 0.05  | 0.12  | 0.02  |
| 46 | 6 | -0.04 | 0.00  | -0.04 | -0.02 | 0.01  | 0.00  | 0.08  | 0.01  | 0.06  |
| 47 | 1 | 0.11  | -0.26 | 0.18  | -0.28 | 0.28  | -0.15 | -0.21 | 0.31  | -0.09 |
| 48 | 6 | 0.04  | 0.00  | 0.02  | 0.10  | 0.08  | 0.06  | -0.11 | -0.04 | -0.07 |
| 49 | 1 | -0.05 | -0.09 | -0.05 | -0.28 | -0.25 | -0.26 | 0.29  | 0.29  | 0.27  |
| 50 | 1 | -0.03 | -0.07 | -0.06 | -0.28 | -0.13 | -0.23 | 0.19  | 0.15  | 0.19  |
| 51 | 6 | 0.01  | -0.01 | 0.00  | 0.02  | 0.00  | 0.03  | 0.05  | -0.05 | -0.03 |
| 52 | 1 | -0.17 | 0.07  | -0.02 | -0.28 | -0.13 | -0.22 | -0.11 | 0.18  | 0.09  |
| 53 | 6 | -0.01 | 0.00  | -0.01 | -0.02 | 0.00  | -0.03 | 0.02  | 0.01  | 0.02  |
| 54 | 1 | 0.04  | 0.02  | 0.04  | 0.10  | 0.05  | 0.10  | -0.08 | -0.03 | -0.07 |
| 55 | 6 | 0.00  | 0.01  | 0.00  | 0.01  | 0.04  | 0.01  | -0.01 | -0.02 | 0.00  |
| 56 | 1 | 0.03  | -0.08 | 0.04  | 0.07  | -0.19 | 0.11  | -0.04 | 0.13  | -0.07 |
| 57 | 6 | 0.00  | 0.00  | 0.00  | 0.00  | -0.01 | 0.00  | 0.00  | 0.01  | -0.01 |
| 58 | 1 | -0.03 | 0.00  | -0.03 | 0.00  | -0.01 | 0.01  | 0.01  | 0.01  | 0.02  |
| 59 | 8 | 0.00  | -0.01 | 0.00  | 0.00  | 0.00  | 0.00  | 0.00  | -0.01 | 0.01  |
| 60 | 8 | 0.01  | 0.00  | 0.00  | 0.00  | 0.00  | 0.00  | 0.00  | 0.00  | 0.00  |
| 61 | 8 | 0.01  | 0.01  | 0.01  | 0.00  | -0.02 | 0.02  | -0.01 | -0.01 | -0.01 |
| 62 | 6 | 0.00  | -0.01 | 0.00  | 0.00  | 0.00  | 0.00  | 0.00  | 0.00  | 0.00  |
| 63 | 6 | 0.00  | 0.01  | 0.00  | 0.00  | 0.00  | 0.00  | 0.00  | 0.00  | 0.00  |
| 64 | 6 | 0.00  | 0.00  | 0.00  | 0.00  | 0.00  | 0.00  | 0.00  | 0.00  | 0.00  |
| 65 | 8 | 0.00  | 0.00  | 0.00  | 0.00  | 0.00  | 0.00  | 0.00  | 0.00  | 0.00  |
| 66 | 1 | 0.00  | -0.01 | 0.00  | 0.00  | 0.00  | 0.00  | 0.00  | 0.00  | 0.00  |
| 67 | 6 | 0.00  | 0.00  | 0.00  | 0.00  | 0.00  | 0.00  | 0.00  | 0.00  | 0.00  |
| 68 | 1 | 0.00  | 0.00  | 0.00  | 0.00  | 0.00  | 0.00  | 0.00  | 0.00  | 0.00  |
| 69 | 1 | 0.00  | 0.00  | 0.00  | 0.00  | 0.00  | 0.00  | 0.00  | 0.00  | 0.00  |
| 70 | 1 | 0.00  | 0.00  | 0.00  | 0.00  | 0.00  | 0.00  | 0.00  | 0.00  | 0.00  |
| 71 | 6 | 0.00  | 0.00  | -0.01 | 0.00  | 0.00  | 0.00  | 0.00  | 0.00  | 0.00  |
| 72 | 1 | 0.00  | 0.00  | 0.02  | 0.00  | 0.00  | -0.01 | 0.00  | 0.00  | -0.01 |
| 73 | 1 | -0.02 | 0.00  | 0.01  | 0.01  | 0.00  | 0.00  | 0.02  | 0.01  | -0.01 |
| 74 | 1 | 0.01  | 0.00  | 0.01  | 0.00  | 0.00  | 0.00  | 0.01  | 0.00  | -0.01 |

139

140

141

A

A

A

|                |           |           |           |
|----------------|-----------|-----------|-----------|
| Frequencies -- | 1326.3406 | 1341.9519 | 1343.0612 |
| Red. masses -- | 2.1218    | 1.4165    | 1.3929    |
| Frc consts --  | 2.1992    | 1.5030    | 1.4803    |
| IR Inten --    | 6.0965    | 1.8729    | 0.8245    |
| Raman Activ -- | 5.2766    | 3.6072    | 6.8235    |
| Depolar (P) -- | 0.6779    | 0.2561    | 0.4832    |
| Depolar (U) -- | 0.8080    | 0.4077    | 0.6516    |

| Atom | AN | X     | Y     | Z     | X     | Y     | Z     | X     | Y     | Z     |
|------|----|-------|-------|-------|-------|-------|-------|-------|-------|-------|
| 1    | 6  | 0.03  | 0.06  | 0.02  | -0.01 | 0.01  | -0.01 | -0.01 | 0.01  | -0.02 |
| 2    | 6  | 0.00  | 0.01  | -0.01 | 0.00  | 0.00  | 0.00  | 0.00  | 0.00  | 0.00  |
| 3    | 6  | -0.14 | -0.17 | -0.04 | 0.01  | 0.01  | 0.01  | 0.00  | 0.02  | 0.01  |
| 4    | 6  | 0.05  | 0.04  | 0.01  | 0.01  | -0.02 | -0.03 | 0.02  | -0.03 | -0.03 |
| 5    | 6  | -0.02 | -0.02 | -0.02 | 0.02  | 0.00  | 0.02  | 0.00  | 0.01  | -0.01 |
| 6    | 6  | 0.01  | -0.02 | 0.01  | -0.01 | 0.05  | -0.09 | 0.00  | -0.06 | 0.07  |
| 7    | 8  | -0.01 | -0.02 | 0.00  | 0.00  | 0.00  | 0.00  | 0.00  | 0.00  | 0.00  |
| 8    | 6  | -0.01 | 0.00  | 0.00  | -0.01 | 0.01  | 0.00  | -0.01 | 0.01  | 0.00  |
| 9    | 6  | 0.00  | 0.00  | 0.01  | -0.01 | 0.06  | 0.06  | -0.01 | 0.06  | 0.07  |
| 10   | 1  | 0.01  | 0.05  | 0.02  | 0.12  | -0.17 | -0.04 | 0.15  | -0.19 | -0.05 |
| 11   | 8  | 0.00  | 0.00  | 0.00  | 0.01  | 0.00  | -0.02 | 0.01  | 0.00  | -0.02 |
| 12   | 6  | -0.01 | -0.01 | 0.01  | -0.05 | -0.04 | 0.01  | -0.06 | -0.04 | 0.01  |

|    |   |       |       |       |       |       |       |         |       |       |
|----|---|-------|-------|-------|-------|-------|-------|---------|-------|-------|
| 13 | 1 | 0.00  | 0.05  | -0.06 | 0.35  | 0.23  | -0.23 | 0.40    | 0.26  | -0.26 |
| 14 | 6 | 0.01  | 0.00  | 0.00  | -0.01 | 0.01  | 0.00  | 0.01    | -0.01 | 0.00  |
| 15 | 8 | 0.00  | 0.00  | 0.00  | 0.00  | 0.00  | 0.00  | 0.00    | 0.00  | 0.00  |
| 16 | 6 | 0.00  | 0.00  | 0.00  | 0.00  | 0.00  | 0.00  | 0.00    | -0.01 | 0.00  |
| 17 | 1 | 0.01  | 0.00  | 0.01  | 0.00  | 0.02  | 0.00  | 0.00    | 0.02  | 0.00  |
| 18 | 1 | -0.01 | 0.00  | 0.00  | 0.01  | 0.01  | -0.01 | 0.01    | 0.01  | -0.01 |
| 19 | 1 | 0.00  | 0.00  | 0.01  | 0.01  | 0.00  | 0.01  | 0.01    | 0.00  | 0.01  |
| 20 | 6 | 0.01  | -0.02 | -0.01 | -0.01 | -0.02 | 0.00  | -0.01   | -0.02 | 0.00  |
| 21 | 1 | 0.00  | -0.13 | -0.04 | 0.10  | -0.25 | -0.16 | 0.11    | -0.27 | -0.18 |
| 22 | 6 | 0.00  | -0.01 | -0.01 | 0.00  | 0.00  | 0.00  | 0.00    | 0.00  | 0.00  |
| 23 | 1 | 0.03  | 0.01  | 0.05  | 0.01  | 0.00  | 0.01  | 0.01    | -0.01 | 0.02  |
| 24 | 1 | 0.01  | 0.00  | -0.02 | 0.00  | -0.01 | 0.01  | 0.01    | -0.02 | 0.01  |
| 25 | 1 | 0.04  | -0.01 | 0.06  | 0.00  | 0.00  | 0.01  | 0.01    | 0.00  | 0.01  |
| 26 | 6 | -0.03 | 0.02  | 0.01  | 0.03  | -0.04 | 0.01  | -0.01   | 0.03  | -0.01 |
| 27 | 1 | -0.06 | 0.11  | -0.01 | -0.16 | 0.24  | -0.02 | 0.11    | -0.17 | 0.01  |
| 28 | 1 | 0.01  | 0.00  | 0.03  | 0.02  | -0.06 | -0.01 | -0.04   | 0.07  | 0.00  |
| 29 | 6 | 0.00  | 0.01  | 0.00  | 0.01  | -0.02 | 0.00  | 0.01    | -0.03 | 0.00  |
| 30 | 1 | 0.03  | -0.07 | -0.04 | -0.05 | 0.12  | 0.08  | -0.06   | 0.14  | 0.09  |
| 31 | 1 | 0.01  | -0.01 | -0.01 | -0.05 | 0.12  | 0.05  | -0.05   | 0.13  | 0.06  |
| 32 | 6 | 0.00  | 0.00  | 0.00  | 0.00  | 0.00  | 0.00  | 0.00    | 0.00  | 0.00  |
| 33 | 1 | 0.00  | 0.01  | -0.01 | 0.00  | -0.01 | 0.00  | 0.00    | -0.01 | 0.00  |
| 34 | 6 | 0.00  | 0.00  | 0.01  | 0.00  | 0.00  | 0.00  | 0.00    | 0.00  | 0.00  |
| 35 | 1 | 0.00  | 0.00  | 0.00  | 0.00  | 0.00  | 0.00  | 0.00    | 0.00  | 0.00  |
| 36 | 6 | -0.01 | -0.01 | 0.00  | 0.00  | 0.00  | 0.02  | 0.00    | 0.01  | 0.02  |
| 37 | 1 | 0.05  | 0.00  | 0.02  | 0.01  | 0.03  | -0.03 | 0.01    | 0.02  | -0.02 |
| 38 | 1 | 0.03  | 0.00  | 0.06  | 0.01  | -0.04 | -0.05 | 0.01    | -0.04 | -0.06 |
| 39 | 1 | -0.01 | 0.03  | 0.01  | 0.00  | -0.01 | -0.04 | 0.00    | -0.02 | -0.05 |
| 40 | 6 | 0.08  | 0.07  | 0.10  | -0.03 | 0.01  | 0.00  | 0.01    | -0.01 | -0.01 |
| 41 | 1 | 0.77  | -0.03 | 0.47  | 0.07  | -0.01 | 0.07  | -0.08   | -0.02 | -0.05 |
| 42 | 6 | 0.00  | 0.01  | 0.00  | 0.01  | -0.01 | 0.02  | -0.01   | 0.01  | -0.01 |
| 43 | 1 | 0.02  | -0.02 | 0.00  | -0.06 | 0.00  | 0.07  | 0.05    | 0.00  | -0.06 |
| 44 | 1 | 0.02  | 0.01  | -0.02 | -0.07 | -0.01 | 0.05  | 0.07    | 0.01  | -0.06 |
| 45 | 1 | -0.01 | -0.02 | 0.00  | 0.00  | -0.01 | 0.00  | -0.01   | 0.01  | -0.02 |
| 46 | 6 | 0.01  | 0.01  | 0.02  | -0.01 | -0.01 | 0.00  | 0.00    | 0.01  | -0.01 |
| 47 | 1 | -0.06 | 0.08  | -0.01 | 0.02  | -0.02 | -0.01 | 0.02    | -0.03 | 0.04  |
| 48 | 6 | -0.01 | 0.00  | -0.01 | -0.01 | -0.01 | 0.02  | 0.02    | 0.00  | -0.01 |
| 49 | 1 | 0.03  | 0.04  | 0.03  | 0.05  | 0.07  | 0.07  | -0.05   | -0.07 | -0.06 |
| 50 | 1 | 0.00  | 0.02  | 0.02  | -0.06 | -0.11 | -0.09 | 0.05    | 0.08  | 0.08  |
| 51 | 6 | -0.01 | 0.00  | -0.01 | 0.05  | -0.04 | -0.01 | -0.05   | 0.04  | 0.01  |
| 52 | 1 | 0.09  | -0.03 | 0.01  | -0.41 | 0.42  | 0.18  | 0.39    | -0.37 | -0.15 |
| 53 | 6 | 0.01  | 0.00  | 0.01  | -0.01 | -0.01 | -0.01 | 0.01    | 0.01  | 0.01  |
| 54 | 1 | -0.02 | -0.01 | -0.02 | 0.02  | 0.01  | 0.03  | -0.02</ |       |       |

|    |   |      |      |      |       |       |      |       |       |      |
|----|---|------|------|------|-------|-------|------|-------|-------|------|
| 65 | 8 | 0.00 | 0.00 | 0.00 | 0.00  | 0.00  | 0.00 | 0.00  | 0.00  | 0.00 |
| 66 | 1 | 0.00 | 0.00 | 0.00 | 0.00  | 0.00  | 0.00 | -0.01 | -0.01 | 0.00 |
| 67 | 6 | 0.00 | 0.00 | 0.00 | 0.00  | 0.00  | 0.00 | 0.00  | 0.00  | 0.00 |
| 68 | 1 | 0.00 | 0.00 | 0.00 | 0.00  | 0.00  | 0.00 | 0.00  | 0.00  | 0.00 |
| 69 | 1 | 0.00 | 0.00 | 0.00 | 0.00  | 0.00  | 0.00 | 0.00  | 0.00  | 0.00 |
| 70 | 1 | 0.00 | 0.00 | 0.00 | 0.00  | 0.00  | 0.00 | 0.00  | 0.00  | 0.00 |
| 71 | 6 | 0.00 | 0.00 | 0.00 | 0.00  | 0.00  | 0.00 | 0.00  | 0.00  | 0.00 |
| 72 | 1 | 0.00 | 0.00 | 0.00 | 0.00  | -0.01 | 0.01 | 0.00  | -0.01 | 0.02 |
| 73 | 1 | 0.00 | 0.00 | 0.00 | -0.01 | 0.00  | 0.00 | -0.01 | 0.00  | 0.01 |
| 74 | 1 | 0.00 | 0.00 | 0.00 | 0.00  | 0.00  | 0.02 | 0.01  | 0.00  | 0.02 |

142

143

144

A

A

A

|                |           |           |           |
|----------------|-----------|-----------|-----------|
| Frequencies -- | 1351.6819 | 1365.6480 | 1368.9888 |
| Red. masses -- | 1.5753    | 1.2715    | 1.8653    |
| Frc consts --  | 1.6958    | 1.3971    | 2.0597    |
| IR Inten --    | 2.3942    | 4.2088    | 4.4971    |
| Raman Activ -- | 1.8233    | 1.0219    | 10.4931   |
| Depolar (P) -- | 0.6812    | 0.6079    | 0.1418    |
| Depolar (U) -- | 0.8104    | 0.7561    | 0.2484    |

| Atom | AN | X     | Y     | Z     | X     | Y     | Z     | X     | Y     | Z     |
|------|----|-------|-------|-------|-------|-------|-------|-------|-------|-------|
| 1    | 6  | 0.00  | 0.00  | 0.01  | 0.00  | -0.01 | 0.01  | 0.00  | 0.00  | 0.00  |
| 2    | 6  | 0.00  | 0.00  | 0.00  | 0.00  | 0.00  | -0.01 | 0.00  | 0.00  | 0.00  |
| 3    | 6  | 0.02  | 0.00  | -0.01 | 0.00  | 0.01  | 0.00  | 0.00  | 0.00  | 0.00  |
| 4    | 6  | -0.01 | 0.00  | 0.00  | -0.01 | -0.01 | -0.01 | 0.01  | 0.00  | 0.00  |
| 5    | 6  | 0.01  | 0.01  | 0.03  | 0.00  | 0.00  | 0.00  | -0.01 | 0.01  | 0.01  |
| 6    | 6  | -0.07 | 0.01  | 0.03  | 0.00  | 0.00  | 0.00  | -0.03 | -0.01 | -0.02 |
| 7    | 8  | 0.00  | 0.00  | 0.00  | 0.00  | 0.00  | 0.00  | 0.00  | 0.00  | 0.00  |
| 8    | 6  | 0.00  | 0.00  | 0.00  | 0.01  | -0.02 | -0.03 | 0.00  | 0.00  | 0.00  |
| 9    | 6  | 0.00  | 0.00  | 0.00  | -0.09 | 0.00  | 0.02  | 0.00  | 0.00  | 0.00  |
| 10   | 1  | -0.01 | 0.00  | 0.01  | 0.58  | 0.25  | -0.29 | 0.01  | 0.00  | 0.00  |
| 11   | 8  | 0.00  | 0.00  | 0.00  | -0.01 | -0.02 | 0.04  | 0.00  | 0.00  | 0.00  |
| 12   | 6  | 0.01  | 0.00  | 0.00  | 0.05  | -0.02 | -0.01 | 0.00  | 0.00  | 0.00  |
| 13   | 1  | -0.02 | -0.04 | 0.04  | -0.18 | 0.21  | -0.28 | 0.02  | 0.01  | 0.00  |
| 14   | 6  | 0.01  | -0.02 | 0.00  | 0.00  | 0.00  | 0.00  | -0.02 | 0.09  | -0.02 |
| 15   | 8  | -0.01 | 0.01  | -0.01 | 0.00  | 0.00  | 0.00  | 0.03  | -0.02 | 0.03  |
| 16   | 6  | 0.00  | 0.00  | 0.00  | -0.02 | 0.01  | 0.00  | 0.00  | 0.00  | 0.00  |
| 17   | 1  | 0.00  | 0.00  | 0.00  | 0.04  | -0.04 | 0.07  | 0.00  | 0.00  | 0.00  |
| 18   | 1  | 0.00  | 0.00  | 0.00  | 0.11  | -0.03 | 0.03  | 0.01  | 0.00  | 0.00  |
| 19   | 1  | 0.00  | 0.00  | 0.00  | 0.08  | 0.01  | 0.00  | 0.01  | 0.00  | 0.00  |
| 20   | 6  | 0.00  | 0.00  | 0.00  | 0.01  | 0.02  | 0.00  | 0.00  | 0.00  | 0.00  |
| 21   | 1  | -0.01 | 0.01  | 0.01  | 0.03  | 0.00  | -0.03 | 0.00  | -0.01 | 0.00  |
| 22   | 6  | 0.00  | 0.00  | 0.00  | 0.00  | 0.00  | 0.00  | 0.00  | 0.00  | 0.00  |
| 23   | 1  | 0.00  | 0.00  | 0.00  | -0.01 | -0.01 | -0.01 | 0.00  | 0.00  | 0.00  |
| 24   | 1  | -0.02 | 0.01  | 0.00  | -0.01 | -0.01 | 0.01  | 0.00  | 0.00  | 0.00  |
| 25   | 1  | -0.02 | 0.01  | -0.01 | -0.01 | 0.01  | 0.00  | 0.00  | 0.00  | 0.00  |
| 26   | 6  | 0.13  | -0.13 | -0.01 | 0.00  | 0.00  | 0.00  | 0.03  | -0.03 | 0.00  |
| 27   | 1  | -0.39 | 0.47  | 0.00  | -0.01 | 0.00  | 0.00  | -0.11 | 0.16  | -0.01 |
| 28   | 1  | -0.38 | 0.47  | 0.01  | 0.00  | 0.00  | 0.00  | -0.07 | 0.09  | 0.00  |
| 29   | 6  | 0.00  | 0.00  | 0.00  | 0.00  | 0.05  | 0.01  | 0.00  | 0.01  | 0.00  |
| 30   | 1  | 0.01  | -0.02 | -0.01 | 0.10  | -0.26 | -0.15 | 0.01  | -0.03 | -0.02 |
| 31   | 1  | 0.00  | -0.01 | -0.01 | 0.11  | -0.22 | -0.17 | 0.01  | -0.02 | -0.01 |
| 32   | 6  | 0.00  | 0.00  | 0.00  | 0.00  | -0.01 | -0.01 | 0.00  | 0.00  | 0.00  |

|    |   |       |       |       |       |       |       |       |       |       |
|----|---|-------|-------|-------|-------|-------|-------|-------|-------|-------|
| 33 | 1 | 0.00  | 0.00  | 0.00  | 0.06  | 0.13  | 0.07  | 0.00  | 0.00  | 0.00  |
| 34 | 6 | 0.00  | 0.00  | 0.00  | -0.01 | 0.00  | 0.02  | 0.00  | 0.00  | 0.00  |
| 35 | 1 | 0.00  | 0.00  | 0.00  | 0.07  | 0.06  | -0.03 | 0.00  | 0.00  | 0.00  |
| 36 | 6 | 0.00  | 0.00  | 0.00  | 0.01  | 0.00  | 0.02  | 0.00  | 0.00  | 0.00  |
| 37 | 1 | 0.00  | 0.00  | 0.00  | -0.03 | 0.03  | -0.06 | 0.01  | 0.00  | 0.01  |
| 38 | 1 | 0.00  | 0.00  | 0.00  | -0.08 | -0.01 | -0.09 | 0.01  | 0.00  | 0.01  |
| 39 | 1 | 0.00  | 0.00  | 0.01  | 0.02  | 0.03  | -0.08 | 0.00  | 0.00  | 0.01  |
| 40 | 6 | -0.04 | 0.05  | 0.00  | 0.00  | 0.00  | 0.00  | -0.01 | 0.01  | 0.00  |
| 41 | 1 | -0.01 | -0.05 | 0.12  | -0.02 | 0.00  | -0.01 | 0.01  | 0.00  | 0.03  |
| 42 | 6 | 0.01  | -0.02 | 0.02  | 0.00  | 0.00  | 0.00  | 0.01  | 0.00  | 0.01  |
| 43 | 1 | 0.03  | 0.10  | -0.08 | 0.00  | 0.00  | 0.00  | -0.01 | 0.02  | 0.01  |
| 44 | 1 | -0.02 | -0.02 | -0.10 | 0.00  | 0.00  | 0.00  | -0.05 | 0.00  | -0.02 |
| 45 | 1 | -0.01 | 0.07  | -0.13 | 0.00  | 0.00  | 0.00  | 0.00  | -0.02 | -0.02 |
| 46 | 6 | 0.01  | -0.03 | 0.00  | 0.00  | 0.00  | 0.00  | 0.02  | 0.00  | 0.00  |
| 47 | 1 | -0.04 | 0.03  | -0.05 | 0.01  | 0.00  | 0.00  | 0.04  | -0.03 | 0.03  |
| 48 | 6 | 0.02  | 0.02  | 0.01  | 0.00  | 0.00  | 0.00  | -0.06 | -0.02 | -0.08 |
| 49 | 1 | -0.07 | -0.06 | -0.06 | 0.00  | 0.00  | 0.00  | 0.10  | 0.04  | 0.08  |
| 50 | 1 | -0.05 | -0.03 | -0.05 | 0.00  | 0.00  | 0.00  | 0.26  | 0.25  | 0.26  |
| 51 | 6 | -0.03 | 0.02  | -0.01 | 0.00  | 0.00  | 0.00  | 0.07  | 0.03  | 0.11  |
| 52 | 1 | 0.28  | -0.13 | 0.00  | 0.01  | 0.01  | 0.01  | -0.17 | -0.37 | -0.35 |
| 53 | 6 | 0.02  | 0.01  | 0.02  | 0.00  | 0.00  | 0.00  | -0.09 | -0.07 | -0.08 |
| 54 | 1 | -0.05 | -0.02 | -0.06 | 0.00  | 0.00  | 0.00  | 0.27  | 0.06  | 0.25  |
| 55 | 6 | -0.01 | -0.02 | 0.00  | 0.00  | 0.00  | 0.00  | 0.03  | 0.09  | 0.01  |
| 56 | 1 | -0.04 | 0.08  | -0.05 | 0.00  | 0.01  | 0.00  | 0.14  | -0.35 | 0.21  |
| 57 | 6 | 0.01  | 0.01  | 0.00  | 0.00  | 0.00  | 0.00  | -0.03 | -0.05 | -0.02 |
| 58 | 1 | -0.02 | 0.02  | -0.02 | 0.00  | 0.00  | 0.00  | 0.09  | -0.09 | 0.11  |
| 59 | 8 | 0.00  | -0.01 | 0.00  | 0.00  | 0.00  | 0.00  | 0.00  | 0.00  | 0.00  |
| 60 | 8 | 0.00  | 0.00  | 0.00  | 0.00  | 0.01  | 0.02  | 0.00  | 0.00  | 0.00  |
| 61 | 8 | 0.00  | 0.01  | -0.01 | 0.00  | 0.00  | 0.00  | 0.00  | 0.00  | 0.00  |
| 62 | 6 | 0.00  | 0.00  | 0.00  | 0.00  | 0.00  | 0.00  | 0.00  | 0.00  | 0.00  |
| 63 | 6 | 0.00  | 0.00  | 0.00  | 0.02  | 0.00  | -0.03 | 0.00  | 0.00  | 0.00  |
| 64 | 6 | 0.00  | 0.00  | 0.00  | 0.00  | 0.01  | 0.01  | 0.00  | 0.00  | 0.00  |
| 65 | 8 | 0.00  | 0.00  | 0.00  | 0.00  | 0.00  | 0.00  | 0.00  | 0.00  | 0.00  |
| 66 | 1 | 0.00  | 0.01  | 0.00  | -0.09 | -0.18 | 0.00  | -0.01 | -0.02 | 0.00  |
| 67 | 6 | 0.00  | 0.00  | 0.00  | 0.00  | 0.01  | 0.01  | 0.00  | 0.00  | 0.00  |
| 68 | 1 | 0.00  | 0.00  | 0.00  | -0.02 | -0.01 | 0.00  | 0.00  | 0.00  | 0.00  |
| 69 | 1 | 0.00  | 0.00  | 0.00  | 0.01  | -0.04 | -0.03 | 0.00  | 0.00  | 0.00  |
| 70 | 1 | 0.00  | 0.00  | 0.00  | 0.00  | -0.03 | -0.03 | 0.00  | 0.00  | 0.00  |
| 71 | 6 | 0.00  | 0.00  | 0.00  | 0.00  | 0.00  | 0.00  | 0.00  | 0.00  | 0.00  |
| 72 | 1 | 0.00  | 0.00  | -0.01 | -0.03 | 0.03  | 0.04  | 0.00  | 0.00  | 0.01  |
| 73 | 1 | 0.01  | 0.00  | 0.00  | -0.04 | 0.03  | 0.03  | -0.01 | 0.00  | 0.00  |
| 74 | 1 | 0.00  | 0.00  | -0.01 | -0.04 | -0.02 | 0.07  | 0.01  | 0.00  | 0.00  |

|                |   |           |   |   |           |   |   |           |   |  |
|----------------|---|-----------|---|---|-----------|---|---|-----------|---|--|
|                |   | 145       |   |   | 146       |   |   | 147       |   |  |
|                |   | A         |   |   | A         |   |   | A         |   |  |
| Frequencies -- |   | 1373.7055 |   |   | 1381.3486 |   |   | 1392.7814 |   |  |
| Red. masses -- |   | 1.3416    |   |   | 1.3321    |   |   | 1.2860    |   |  |
| Frc consts --  |   | 1.4916    |   |   | 1.4976    |   |   | 1.4698    |   |  |
| IR Inten --    |   | 4.3307    |   |   | 0.8619    |   |   | 4.4872    |   |  |
| Raman Activ -- |   | 9.0916    |   |   | 1.6091    |   |   | 7.7674    |   |  |
| Depolar (P) -- |   | 0.4507    |   |   | 0.3284    |   |   | 0.7121    |   |  |
| Depolar (U) -- |   | 0.6214    |   |   | 0.4944    |   |   | 0.8318    |   |  |
| Atom AN        | X | Y         | Z | X | Y         | Z | X | Y         | Z |  |

|    |   |       |       |       |       |       |       |       |       |       |
|----|---|-------|-------|-------|-------|-------|-------|-------|-------|-------|
| 1  | 6 | 0.00  | 0.00  | 0.00  | 0.00  | 0.00  | 0.02  | 0.00  | 0.00  | 0.01  |
| 2  | 6 | 0.00  | 0.00  | 0.00  | 0.00  | 0.00  | 0.00  | 0.01  | -0.01 | -0.02 |
| 3  | 6 | 0.00  | 0.00  | 0.00  | 0.00  | -0.01 | -0.01 | 0.00  | 0.00  | 0.00  |
| 4  | 6 | 0.00  | 0.00  | 0.00  | 0.00  | 0.00  | 0.01  | 0.01  | 0.01  | 0.02  |
| 5  | 6 | 0.00  | 0.00  | 0.00  | 0.00  | 0.00  | 0.00  | 0.00  | 0.00  | -0.01 |
| 6  | 6 | 0.00  | 0.00  | 0.00  | 0.00  | 0.00  | 0.00  | 0.00  | 0.00  | 0.00  |
| 7  | 8 | 0.00  | 0.00  | 0.00  | 0.00  | 0.00  | 0.00  | 0.00  | 0.01  | 0.00  |
| 8  | 6 | 0.00  | 0.00  | -0.01 | -0.03 | 0.03  | 0.04  | 0.00  | 0.04  | 0.01  |
| 9  | 6 | -0.02 | 0.00  | 0.01  | -0.06 | -0.07 | -0.01 | 0.01  | -0.02 | 0.03  |
| 10 | 1 | 0.18  | 0.06  | -0.08 | 0.34  | 0.34  | -0.14 | 0.16  | 0.14  | -0.02 |
| 11 | 8 | 0.00  | -0.01 | 0.01  | 0.01  | 0.02  | -0.01 | 0.00  | 0.00  | 0.00  |
| 12 | 6 | 0.00  | 0.00  | -0.01 | 0.04  | 0.01  | -0.01 | -0.03 | 0.04  | -0.04 |
| 13 | 1 | 0.01  | 0.00  | -0.01 | -0.26 | 0.03  | -0.06 | 0.25  | -0.37 | 0.42  |
| 14 | 6 | 0.00  | 0.00  | 0.00  | 0.00  | 0.00  | 0.00  | 0.00  | 0.00  | 0.00  |
| 15 | 8 | 0.00  | 0.00  | 0.00  | 0.00  | 0.00  | 0.00  | 0.00  | 0.00  | 0.00  |
| 16 | 6 | -0.01 | 0.00  | 0.00  | 0.03  | -0.01 | 0.00  | -0.04 | 0.00  | -0.03 |
| 17 | 1 | 0.02  | -0.01 | 0.03  | -0.05 | 0.08  | -0.06 | 0.11  | -0.01 | 0.20  |
| 18 | 1 | 0.05  | -0.01 | 0.01  | -0.11 | 0.04  | -0.04 | 0.22  | -0.07 | 0.03  |
| 19 | 1 | 0.04  | 0.01  | 0.01  | -0.12 | -0.01 | 0.01  | 0.19  | 0.05  | 0.12  |
| 20 | 6 | 0.00  | 0.01  | 0.00  | 0.01  | 0.01  | -0.01 | -0.03 | 0.01  | 0.01  |
| 21 | 1 | 0.03  | -0.03 | -0.03 | 0.09  | 0.16  | -0.02 | 0.23  | -0.11 | -0.25 |
| 22 | 6 | 0.00  | 0.00  | 0.00  | 0.00  | 0.00  | 0.00  | 0.01  | -0.01 | 0.01  |
| 23 | 1 | 0.00  | 0.00  | 0.00  | -0.01 | 0.00  | -0.02 | 0.00  | 0.05  | -0.07 |
| 24 | 1 | 0.00  | 0.00  | 0.00  | -0.02 | 0.03  | -0.02 | -0.03 | 0.05  | -0.04 |
| 25 | 1 | 0.00  | 0.00  | 0.00  | 0.00  | -0.01 | -0.01 | -0.08 | 0.03  | -0.05 |
| 26 | 6 | 0.00  | 0.00  | 0.00  | 0.00  | 0.00  | 0.00  | 0.00  | 0.00  | 0.00  |
| 27 | 1 | 0.00  | 0.00  | 0.00  | -0.01 | 0.01  | 0.00  | 0.00  | 0.00  | 0.00  |
| 28 | 1 | 0.00  | 0.00  | 0.00  | -0.01 | 0.01  | 0.00  | 0.00  | 0.00  | 0.00  |
| 29 | 6 | 0.00  | 0.01  | 0.00  | 0.03  | -0.10 | -0.03 | 0.00  | -0.02 | -0.01 |
| 30 | 1 | 0.03  | -0.08 | -0.05 | -0.18 | 0.48  | 0.27  | -0.02 | 0.08  | 0.04  |
| 31 | 1 | 0.03  | -0.06 | -0.05 | -0.17 | 0.37  | 0.20  | -0.03 | 0.06  | 0.03  |
| 32 | 6 | 0.00  | -0.01 | -0.01 | 0.01  | 0.00  | 0.00  | 0.00  | -0.05 | -0.06 |
| 33 | 1 | 0.02  | 0.05  | 0.03  | -0.04 | -0.09 | -0.05 | 0.15  | 0.28  | 0.13  |
| 34 | 6 | -0.01 | 0.00  | 0.01  | 0.01  | 0.01  | -0.01 | -0.05 | -0.02 | 0.05  |
| 35 | 1 | 0.03  | 0.03  | -0.02 | -0.03 | -0.02 | 0.01  | 0.21  | 0.19  | -0.12 |
| 36 | 6 | 0.00  | 0.00  | 0.01  | 0.00  | 0.00  | 0.01  | 0.00  | 0.00  | -0.01 |
| 37 | 1 | -0.01 | 0.01  | -0.02 | -0.01 | 0.01  | -0.02 | 0.00  | -0.04 | 0.05  |
| 38 | 1 | -0.02 | 0.00  | -0.02 | -0.06 | 0.01  | -0.03 | 0.00  | 0.04  | 0.07  |
| 39 | 1 | 0.01  | 0.01  | -0.03 | 0.01  | 0.03  | -0.04 | 0.00  | 0.00  | 0.03  |
| 40 | 6 | 0.00  | 0.00  | 0.00  | 0.00  | 0.00  | 0.00  | 0.00  | 0.00  | 0.00  |
| 41 | 1 | 0.00  | 0.00  | 0.00  | 0.03  | 0.01  | 0.01  | -0.01 | 0.00  | 0.00  |
| 42 | 6 | 0.00  | 0.00  | 0.00  | 0.00  | 0.00  | 0.00  | 0.00  | 0.00  | 0.00  |
| 43 | 1 | 0.00  | 0.01  | -0.01 | 0.00  | 0.00  | 0.00  | 0.00  | 0.01  | 0.00  |
| 44 | 1 | 0.00  | 0.00  | -0.01 | 0.00  | 0.00  | 0.00  | -0.02 | 0.00  | 0.01  |
| 45 | 1 | 0.00  | 0.00  | 0.00  | 0.00  | 0.00  | 0.00  | 0.00  | -0.02 | 0.01  |
| 46 | 6 | 0.00  | 0.00  | 0.00  | 0.00  | 0.00  | 0.00  | 0.00  | 0.00  | 0.00  |
| 47 | 1 | 0.01  | -0.01 | 0.00  | 0.02  | -0.01 | 0.00  | 0.00  | -0.01 | 0.01  |
| 48 | 6 | 0.00  | 0.00  | 0.00  | 0.00  | 0.00  | 0.00  | 0.00  | 0.00  | 0.00  |
| 49 | 1 | 0.00  | 0.00  | 0.00  | 0.01  | 0.00  | 0.01  | 0.00  | 0.00  | 0.00  |
| 50 | 1 | 0.00  | 0.00  | 0.01  | 0.01  | 0.01  | 0.01  | 0.00  | 0.00  | 0.00  |
| 51 | 6 | 0.00  | 0.00  | 0.00  | 0.00  | 0.00  | 0.00  | 0.00  | 0.00  | 0.00  |
| 52 | 1 | 0.00  | 0.00  | 0.00  | 0.00  | -0.01 | -0.01 | 0.00  | 0.00  | 0.00  |

|    |   |       |       |       |      |       |       |       |       |       |
|----|---|-------|-------|-------|------|-------|-------|-------|-------|-------|
| 53 | 6 | 0.00  | 0.00  | 0.00  | 0.00 | 0.00  | 0.00  | 0.00  | 0.00  | 0.00  |
| 54 | 1 | 0.00  | 0.00  | 0.00  | 0.01 | 0.00  | 0.01  | 0.00  | 0.00  | 0.00  |
| 55 | 6 | 0.00  | 0.00  | 0.00  | 0.00 | 0.00  | 0.00  | 0.00  | 0.00  | 0.00  |
| 56 | 1 | 0.00  | 0.00  | 0.00  | 0.00 | -0.01 | 0.01  | 0.00  | 0.00  | 0.00  |
| 57 | 6 | 0.00  | 0.00  | 0.00  | 0.00 | 0.00  | 0.00  | 0.00  | 0.00  | 0.00  |
| 58 | 1 | 0.00  | 0.00  | 0.00  | 0.00 | 0.00  | 0.00  | 0.00  | 0.00  | 0.00  |
| 59 | 8 | 0.00  | 0.00  | 0.00  | 0.00 | 0.00  | 0.00  | 0.00  | 0.00  | 0.00  |
| 60 | 8 | 0.00  | 0.01  | 0.00  | 0.00 | 0.00  | 0.01  | 0.00  | -0.01 | -0.02 |
| 61 | 8 | 0.00  | 0.00  | 0.00  | 0.00 | 0.00  | 0.00  | 0.00  | 0.00  | 0.00  |
| 62 | 6 | 0.00  | -0.02 | 0.00  | 0.00 | 0.00  | 0.00  | 0.00  | -0.02 | 0.00  |
| 63 | 6 | -0.09 | 0.01  | 0.11  | 0.00 | 0.00  | 0.00  | 0.01  | 0.01  | -0.01 |
| 64 | 6 | 0.00  | -0.05 | -0.03 | 0.00 | 0.00  | 0.00  | 0.00  | 0.01  | 0.00  |
| 65 | 8 | 0.00  | 0.00  | -0.01 | 0.00 | 0.00  | 0.00  | 0.00  | 0.00  | 0.01  |
| 66 | 1 | 0.36  | 0.71  | -0.01 | 0.01 | 0.03  | 0.00  | -0.04 | -0.07 | 0.00  |
| 67 | 6 | 0.01  | -0.03 | -0.04 | 0.00 | 0.00  | 0.00  | 0.00  | 0.01  | 0.01  |
| 68 | 1 | 0.09  | 0.09  | -0.01 | 0.00 | 0.00  | 0.00  | -0.02 | -0.02 | 0.00  |
| 69 | 1 | -0.05 | 0.19  | 0.12  | 0.00 | 0.01  | 0.01  | 0.01  | -0.04 | -0.02 |
| 70 | 1 | 0.01  | 0.15  | 0.14  | 0.00 | 0.01  | 0.01  | 0.00  | -0.03 | -0.03 |
| 71 | 6 | -0.01 | -0.01 | 0.00  | 0.00 | 0.00  | 0.00  | 0.00  | 0.00  | 0.00  |
| 72 | 1 | 0.09  | -0.10 | -0.17 | 0.00 | 0.00  | -0.02 | -0.01 | 0.00  | 0.02  |
| 73 | 1 | 0.17  | -0.03 | -0.10 | 0.01 | 0.01  | 0.00  | -0.01 | -0.03 | 0.00  |
| 74 | 1 | 0.16  | 0.05  | -0.17 | 0.00 | 0.00  | 0.00  | -0.01 | 0.00  | -0.04 |

148

149

150

A

A

A

|                |           |           |           |
|----------------|-----------|-----------|-----------|
| Frequencies -- | 1399.4114 | 1404.0182 | 1411.6946 |
| Red. masses -- | 1.3363    | 1.2745    | 1.3333    |
| Frc consts --  | 1.5419    | 1.4803    | 1.5655    |
| IR Inten --    | 7.3054    | 5.7921    | 3.6967    |
| Raman Activ -- | 2.6928    | 1.3462    | 24.7660   |
| Depolar (P) -- | 0.6755    | 0.7065    | 0.4945    |
| Depolar (U) -- | 0.8063    | 0.8280    | 0.6617    |

| Atom | AN | X     | Y     | Z     | X     | Y     | Z     | X     | Y     | Z     |
|------|----|-------|-------|-------|-------|-------|-------|-------|-------|-------|
| 1    | 6  | 0.00  | 0.00  | -0.01 | -0.01 | 0.01  | -0.01 | 0.00  | 0.00  | 0.00  |
| 2    | 6  | -0.01 | 0.01  | 0.02  | 0.00  | -0.01 | 0.00  | 0.00  | 0.00  | 0.00  |
| 3    | 6  | 0.00  | -0.01 | 0.00  | 0.00  | 0.00  | 0.00  | 0.00  | 0.00  | 0.00  |
| 4    | 6  | 0.00  | 0.01  | 0.02  | 0.00  | 0.00  | 0.00  | 0.00  | 0.00  | 0.00  |
| 5    | 6  | 0.00  | 0.00  | -0.01 | 0.00  | 0.00  | 0.00  | 0.00  | 0.00  | 0.00  |
| 6    | 6  | 0.00  | 0.01  | 0.00  | 0.00  | 0.01  | 0.00  | 0.00  | 0.00  | 0.00  |
| 7    | 8  | 0.00  | -0.01 | 0.00  | 0.01  | 0.01  | 0.00  | 0.00  | 0.00  | 0.00  |
| 8    | 6  | -0.01 | -0.04 | -0.03 | 0.02  | 0.03  | 0.04  | 0.00  | 0.00  | 0.00  |
| 9    | 6  | -0.04 | 0.02  | 0.05  | 0.01  | -0.01 | -0.01 | 0.00  | 0.00  | 0.00  |
| 10   | 1  | 0.36  | 0.04  | -0.15 | -0.05 | 0.03  | 0.03  | -0.01 | -0.01 | 0.00  |
| 11   | 8  | 0.00  | -0.01 | 0.01  | 0.00  | 0.00  | 0.00  | 0.00  | 0.00  | 0.00  |
| 12   | 6  | -0.02 | 0.04  | -0.05 | 0.00  | 0.00  | 0.00  | 0.00  | 0.00  | 0.00  |
| 13   | 1  | 0.28  | -0.39 | 0.42  | -0.01 | 0.00  | 0.01  | -0.01 | 0.02  | -0.02 |
| 14   | 6  | 0.00  | 0.00  | 0.00  | 0.00  | 0.00  | 0.00  | 0.00  | 0.00  | 0.00  |
| 15   | 8  | 0.00  | 0.00  | 0.00  | 0.00  | 0.00  | 0.00  | 0.00  | 0.00  | 0.00  |
| 16   | 6  | 0.03  | 0.00  | 0.03  | 0.03  | -0.02 | 0.01  | 0.00  | 0.00  | 0.00  |
| 17   | 1  | -0.09 | 0.01  | -0.14 | -0.09 | 0.11  | -0.11 | 0.00  | 0.00  | 0.00  |
| 18   | 1  | -0.13 | 0.07  | -0.02 | -0.14 | 0.08  | -0.06 | 0.00  | 0.00  | 0.00  |
| 19   | 1  | -0.14 | -0.05 | -0.11 | -0.17 | -0.03 | -0.03 | 0.00  | 0.00  | 0.00  |
| 20   | 6  | 0.01  | 0.02  | 0.00  | 0.00  | 0.00  | -0.01 | 0.00  | 0.00  | 0.00  |



|    |   |       |       |       |       |       |       |       |       |       |
|----|---|-------|-------|-------|-------|-------|-------|-------|-------|-------|
| 21 | 1 | -0.02 | -0.18 | -0.04 | -0.13 | -0.06 | 0.08  | -0.01 | 0.01  | 0.02  |
| 22 | 6 | -0.01 | 0.02  | -0.02 | -0.05 | 0.05  | -0.07 | 0.00  | 0.00  | 0.00  |
| 23 | 1 | 0.01  | -0.07 | 0.12  | 0.04  | -0.21 | 0.38  | 0.00  | 0.00  | 0.00  |
| 24 | 1 | 0.04  | -0.11 | 0.07  | 0.12  | -0.34 | 0.21  | 0.00  | 0.00  | 0.00  |
| 25 | 1 | 0.13  | -0.04 | 0.10  | 0.40  | -0.11 | 0.33  | 0.00  | 0.00  | 0.00  |
| 26 | 6 | 0.00  | 0.00  | 0.00  | 0.00  | -0.01 | 0.00  | 0.00  | 0.00  | 0.00  |
| 27 | 1 | 0.00  | 0.00  | 0.00  | -0.02 | 0.02  | 0.00  | 0.00  | 0.00  | 0.00  |
| 28 | 1 | 0.00  | 0.00  | 0.00  | 0.00  | 0.01  | 0.00  | 0.00  | 0.00  | 0.00  |
| 29 | 6 | 0.00  | 0.02  | 0.00  | 0.00  | 0.00  | 0.00  | 0.00  | 0.00  | 0.00  |
| 30 | 1 | 0.04  | -0.08 | -0.05 | 0.00  | 0.03  | 0.01  | 0.00  | 0.00  | 0.00  |
| 31 | 1 | 0.02  | -0.04 | -0.06 | 0.01  | -0.02 | 0.00  | 0.00  | 0.00  | 0.00  |
| 32 | 6 | 0.00  | 0.04  | 0.06  | 0.00  | -0.04 | -0.05 | 0.00  | 0.00  | 0.00  |
| 33 | 1 | -0.14 | -0.27 | -0.12 | 0.13  | 0.24  | 0.10  | 0.00  | 0.00  | 0.00  |
| 34 | 6 | 0.05  | 0.02  | -0.05 | -0.05 | -0.02 | 0.04  | 0.00  | 0.00  | 0.00  |
| 35 | 1 | -0.21 | -0.18 | 0.12  | 0.20  | 0.17  | -0.12 | 0.00  | 0.00  | 0.00  |
| 36 | 6 | 0.00  | 0.00  | 0.00  | 0.01  | 0.00  | 0.02  | 0.00  | 0.00  | 0.00  |
| 37 | 1 | -0.04 | -0.01 | -0.01 | -0.05 | 0.03  | -0.07 | 0.00  | 0.00  | 0.00  |
| 38 | 1 | -0.05 | 0.03  | 0.01  | -0.04 | -0.02 | -0.07 | 0.00  | 0.00  | -0.01 |
| 39 | 1 | 0.01  | 0.01  | -0.04 | 0.01  | -0.01 | -0.09 | 0.00  | 0.00  | 0.00  |
| 40 | 6 | 0.01  | 0.00  | 0.00  | 0.02  | 0.00  | 0.01  | 0.00  | 0.00  | 0.00  |
| 41 | 1 | -0.02 | 0.01  | -0.01 | -0.10 | 0.01  | -0.04 | 0.00  | 0.00  | 0.00  |
| 42 | 6 | 0.00  | 0.00  | 0.00  | 0.00  | 0.00  | 0.01  | 0.00  | 0.00  | 0.00  |
| 43 | 1 | 0.01  | 0.01  | -0.02 | 0.01  | 0.02  | -0.02 | 0.00  | 0.00  | 0.00  |
| 44 | 1 | -0.02 | 0.00  | 0.00  | 0.01  | 0.00  | -0.02 | 0.01  | 0.00  | 0.00  |
| 45 | 1 | -0.01 | -0.02 | -0.01 | 0.00  | 0.02  | -0.03 | 0.00  | 0.01  | 0.00  |
| 46 | 6 | 0.00  | 0.00  | 0.00  | 0.00  | 0.00  | 0.00  | 0.00  | 0.00  | 0.00  |
| 47 | 1 | 0.01  | -0.01 | 0.01  | 0.01  | -0.01 | 0.01  | 0.00  | 0.01  | 0.00  |
| 48 | 6 | 0.00  | 0.00  | 0.00  | 0.00  | 0.00  | 0.00  | 0.00  | 0.00  | 0.00  |
| 49 | 1 | 0.01  | 0.00  | 0.00  | 0.00  | 0.00  | 0.00  | 0.00  | 0.00  | 0.00  |
| 50 | 1 | 0.00  | 0.00  | 0.00  | 0.00  | 0.00  | 0.00  | 0.00  | 0.00  | 0.00  |
| 51 | 6 | 0.00  | 0.00  | 0.00  | 0.00  | 0.00  | 0.00  | 0.00  | 0.00  | 0.00  |
| 52 | 1 | -0.01 | 0.01  | 0.00  | -0.01 | 0.01  | 0.01  | 0.01  | 0.00  | 0.00  |
| 53 | 6 | 0.00  | 0.00  | 0.00  | 0.00  | 0.00  | 0.00  | 0.00  | 0.00  | 0.00  |
| 54 | 1 | 0.00  | 0.00  | 0.00  | 0.00  | 0.00  | 0.00  | 0.00  | 0.00  | 0.00  |
| 55 | 6 | 0.00  | 0.00  | 0.00  | 0.00  | 0.00  | 0.00  | 0.00  | 0.00  | 0.00  |
| 56 | 1 | 0.00  | 0.00  | 0.00  | 0.00  | 0.00  | 0.00  | 0.00  | 0.00  | 0.00  |
| 57 | 6 | 0.00  | 0.00  | 0.00  | 0.00  | 0.00  | 0.00  | 0.00  | 0.00  | 0.00  |
| 58 | 1 | 0.00  | 0.00  | 0.00  | 0.00  | 0.00  | 0.00  | 0.00  | 0.00  | 0.00  |
| 59 | 8 | 0.00  | 0.00  | 0.00  | 0.00  | 0.00  | 0.00  | 0.00  | 0.00  | 0.00  |
| 60 | 8 | 0.00  | 0.00  | -0.02 | 0.00  | 0.00  | 0.00  | 0.00  | 0.00  | 0.00  |
| 61 | 8 | 0.00  | 0.00  | 0.00  | 0.00  | 0.00  | 0.00  | 0.00  | 0.00  | 0.00  |
| 62 | 6 | 0.00  | -0.03 | 0.00  | 0.00  | 0.00  | 0.00  | 0.01  | -0.01 | 0.00  |
| 63 | 6 | 0.00  | 0.01  | 0.00  | 0.00  | 0.00  | 0.00  | -0.04 | 0.01  | 0.06  |
| 64 | 6 | 0.01  | 0.01  | 0.00  | 0.00  | 0.00  | 0.00  | 0.01  | -0.04 | -0.03 |
| 65 | 8 | 0.00  | 0.00  | 0.01  | 0.00  | 0.00  | 0.00  | 0.00  | 0.00  | -0.01 |
| 66 | 1 | -0.02 | -0.04 | 0.00  | 0.00  | 0.00  | 0.00  | 0.15  | 0.26  | -0.02 |
| 67 | 6 | 0.00  | 0.00  | 0.01  | 0.00  | 0.00  | 0.00  | 0.04  | 0.12  | 0.04  |
| 68 | 1 | -0.01 | -0.02 | 0.00  | 0.00  | 0.00  | 0.00  | -0.22 | -0.37 | -0.03 |
| 69 | 1 | 0.01  | -0.03 | -0.02 | 0.00  | 0.00  | 0.00  | 0.09  | -0.57 | -0.01 |
| 70 | 1 | 0.00  | -0.03 | -0.03 | 0.00  | 0.00  | 0.00  | -0.31 | -0.33 | -0.34 |
| 71 | 6 | 0.00  | 0.00  | 0.00  | 0.00  | 0.00  | 0.00  | 0.03  | -0.01 | -0.04 |
| 72 | 1 | 0.00  | 0.00  | 0.02  | 0.00  | 0.00  | 0.00  | -0.05 | 0.07  | 0.11  |

|                |    |           |       |       |           |       |       |           |       |       |
|----------------|----|-----------|-------|-------|-----------|-------|-------|-----------|-------|-------|
| 73             | 1  | 0.00      | -0.03 | 0.00  | 0.00      | 0.00  | 0.00  | -0.09     | 0.05  | 0.03  |
| 74             | 1  | 0.00      | 0.00  | -0.04 | 0.00      | 0.00  | 0.00  | -0.05     | -0.04 | 0.10  |
|                |    | 151       |       |       | 152       |       |       | 153       |       |       |
|                |    | A         |       |       | A         |       |       | A         |       |       |
| Frequencies -- |    | 1417.0146 |       |       | 1417.9087 |       |       | 1418.7082 |       |       |
| Red. masses -- |    | 1.5856    |       |       | 1.6082    |       |       | 1.2589    |       |       |
| Frc consts --  |    | 1.8758    |       |       | 1.9050    |       |       | 1.4929    |       |       |
| IR Inten --    |    | 7.5776    |       |       | 6.7934    |       |       | 0.6510    |       |       |
| Raman Activ -- |    | 17.8210   |       |       | 3.5193    |       |       | 1.2396    |       |       |
| Depolar (P) -- |    | 0.3864    |       |       | 0.3946    |       |       | 0.4207    |       |       |
| Depolar (U) -- |    | 0.5574    |       |       | 0.5659    |       |       | 0.5922    |       |       |
| Atom           | AN | X         | Y     | Z     | X         | Y     | Z     | X         | Y     | Z     |
| 1              | 6  | 0.00      | 0.00  | 0.00  | 0.00      | 0.00  | 0.00  | 0.00      | -0.01 | 0.00  |
| 2              | 6  | 0.00      | 0.00  | 0.00  | 0.00      | 0.00  | 0.00  | 0.01      | 0.00  | -0.01 |
| 3              | 6  | 0.00      | 0.00  | 0.00  | 0.00      | 0.00  | 0.00  | -0.01     | 0.01  | 0.00  |
| 4              | 6  | -0.01     | 0.00  | 0.00  | 0.00      | 0.00  | 0.00  | 0.01      | 0.00  | -0.01 |
| 5              | 6  | 0.01      | -0.01 | -0.01 | -0.01     | 0.01  | 0.01  | -0.01     | 0.01  | 0.01  |
| 6              | 6  | 0.01      | 0.01  | 0.02  | 0.00      | 0.00  | -0.02 | 0.01      | 0.00  | 0.00  |
| 7              | 8  | 0.00      | 0.00  | 0.00  | 0.00      | 0.00  | 0.00  | 0.00      | 0.00  | 0.00  |
| 8              | 6  | 0.00      | 0.00  | 0.00  | 0.00      | 0.00  | 0.00  | 0.00      | 0.01  | 0.00  |
| 9              | 6  | 0.00      | 0.00  | 0.00  | 0.00      | 0.00  | 0.00  | -0.01     | 0.00  | 0.01  |
| 10             | 1  | -0.05     | -0.03 | 0.02  | 0.01      | 0.00  | -0.01 | 0.11      | 0.03  | -0.05 |
| 11             | 8  | 0.00      | 0.00  | 0.00  | 0.00      | 0.00  | 0.00  | 0.00      | -0.01 | 0.01  |
| 12             | 6  | 0.00      | 0.00  | 0.00  | 0.00      | 0.00  | 0.00  | -0.01     | -0.01 | 0.00  |
| 13             | 1  | -0.02     | 0.00  | 0.00  | 0.00      | 0.04  | -0.05 | 0.05      | 0.05  | -0.06 |
| 14             | 6  | 0.05      | 0.11  | 0.02  | -0.05     | -0.11 | -0.02 | 0.01      | 0.03  | 0.01  |
| 15             | 8  | 0.00      | -0.01 | 0.00  | 0.00      | 0.01  | 0.00  | 0.00      | 0.00  | 0.00  |
| 16             | 6  | -0.02     | 0.01  | -0.02 | 0.01      | 0.00  | 0.01  | 0.06      | -0.01 | 0.04  |
| 17             | 1  | 0.07      | -0.04 | 0.10  | -0.02     | 0.01  | -0.03 | -0.17     | 0.08  | -0.26 |
| 18             | 1  | 0.11      | -0.06 | 0.03  | -0.04     | 0.02  | -0.01 | -0.29     | 0.15  | -0.09 |
| 19             | 1  | 0.10      | 0.03  | 0.06  | -0.04     | -0.01 | -0.02 | -0.27     | -0.08 | -0.16 |
| 20             | 6  | 0.00      | 0.00  | 0.00  | 0.00      | 0.00  | 0.00  | 0.00      | 0.01  | 0.00  |
| 21             | 1  | -0.02     | 0.03  | 0.03  | -0.01     | 0.01  | 0.01  | 0.02      | -0.06 | -0.04 |
| 22             | 6  | 0.00      | 0.00  | 0.00  | 0.00      | 0.00  | 0.00  | 0.02      | -0.01 | 0.03  |
| 23             | 1  | 0.01      | 0.01  | 0.02  | 0.00      | 0.00  | -0.02 | -0.04     | 0.02  | -0.13 |
| 24             | 1  | 0.01      | -0.02 | 0.01  | -0.01     | 0.02  | -0.01 | -0.06     | 0.13  | -0.08 |
| 25             | 1  | 0.00      | 0.01  | 0.02  | -0.01     | 0.00  | -0.02 | -0.10     | 0.00  | -0.13 |
| 26             | 6  | -0.01     | 0.01  | 0.00  | 0.00      | 0.00  | 0.00  | -0.01     | 0.00  | 0.00  |
| 27             | 1  | 0.04      | -0.04 | 0.00  | -0.01     | 0.03  | -0.01 | 0.03      | -0.02 | -0.01 |
| 28             | 1  | 0.02      | 0.00  | 0.01  | 0.01      | -0.01 | 0.00  | 0.03      | -0.01 | 0.01  |
| 29             | 6  | 0.00      | 0.00  | 0.00  | 0.00      | 0.00  | 0.00  | 0.00      | 0.01  | 0.01  |
| 30             | 1  | -0.02     | 0.01  | 0.02  | 0.00      | -0.01 | -0.01 | 0.04      | -0.05 | -0.04 |
| 31             | 1  | -0.01     | 0.02  | 0.02  | 0.00      | -0.01 | -0.01 | 0.02      | -0.05 | -0.06 |
| 32             | 6  | 0.00      | 0.01  | 0.01  | 0.00      | 0.00  | 0.00  | 0.00      | -0.02 | -0.03 |
| 33             | 1  | -0.03     | -0.05 | -0.02 | 0.01      | 0.02  | 0.01  | 0.07      | 0.12  | 0.05  |
| 34             | 6  | 0.01      | 0.01  | -0.01 | 0.00      | 0.00  | 0.00  | -0.03     | -0.01 | 0.02  |
| 35             | 1  | -0.04     | -0.03 | 0.02  | 0.01      | 0.01  | -0.01 | 0.09      | 0.08  | -0.06 |
| 36             | 6  | 0.01      | 0.00  | 0.03  | 0.00      | 0.00  | 0.00  | -0.02     | 0.01  | -0.07 |
| 37             | 1  | -0.05     | 0.08  | -0.14 | 0.01      | 0.00  | 0.01  | 0.11      | -0.16 | 0.28  |
| 38             | 1  | -0.07     | -0.04 | -0.15 | 0.01      | 0.00  | 0.01  | 0.15      | 0.09  | 0.31  |
| 39             | 1  | 0.03      | 0.02  | -0.15 | 0.00      | 0.00  | 0.01  | -0.05     | -0.03 | 0.32  |
| 40             | 6  | 0.00      | 0.00  | 0.00  | -0.01     | 0.00  | 0.00  | 0.01      | 0.00  | 0.00  |

|    |   |       |       |       |       |       |       |       |       |       |
|----|---|-------|-------|-------|-------|-------|-------|-------|-------|-------|
| 41 | 1 | 0.02  | 0.00  | 0.00  | 0.02  | 0.00  | 0.01  | -0.07 | -0.01 | -0.02 |
| 42 | 6 | -0.02 | -0.02 | 0.04  | 0.01  | 0.00  | 0.00  | -0.01 | -0.02 | 0.04  |
| 43 | 1 | 0.10  | 0.09  | -0.14 | -0.02 | 0.01  | 0.02  | 0.09  | 0.09  | -0.13 |
| 44 | 1 | 0.09  | -0.02 | -0.17 | -0.05 | 0.00  | 0.01  | 0.07  | -0.02 | -0.17 |
| 45 | 1 | -0.03 | 0.11  | -0.15 | 0.00  | -0.04 | 0.02  | -0.03 | 0.09  | -0.15 |
| 46 | 6 | -0.01 | 0.01  | 0.00  | 0.00  | 0.00  | -0.01 | 0.02  | -0.02 | 0.00  |
| 47 | 1 | 0.01  | 0.00  | 0.01  | 0.02  | -0.04 | 0.02  | -0.07 | 0.05  | -0.02 |
| 48 | 6 | 0.01  | 0.00  | 0.02  | -0.01 | 0.00  | -0.02 | 0.00  | 0.01  | 0.01  |
| 49 | 1 | 0.00  | 0.04  | 0.00  | 0.01  | -0.03 | 0.01  | -0.02 | -0.01 | -0.01 |
| 50 | 1 | -0.06 | -0.05 | -0.05 | 0.07  | 0.06  | 0.06  | -0.02 | -0.03 | -0.04 |
| 51 | 6 | -0.05 | -0.04 | -0.06 | 0.05  | 0.04  | 0.06  | -0.01 | -0.02 | -0.02 |
| 52 | 1 | 0.25  | 0.17  | 0.26  | -0.29 | -0.16 | -0.27 | 0.05  | 0.07  | 0.08  |
| 53 | 6 | -0.06 | -0.05 | -0.05 | 0.06  | 0.05  | 0.05  | -0.02 | -0.01 | -0.01 |
| 54 | 1 | 0.10  | 0.01  | 0.10  | -0.11 | -0.01 | -0.10 | 0.03  | 0.00  | 0.03  |
| 55 | 6 | 0.02  | 0.03  | 0.01  | -0.02 | -0.03 | -0.01 | 0.01  | 0.01  | 0.00  |
| 56 | 1 | 0.05  | -0.06 | 0.06  | -0.05 | 0.06  | -0.06 | 0.02  | -0.02 | 0.02  |
| 57 | 6 | 0.00  | -0.05 | 0.01  | 0.00  | 0.06  | -0.01 | 0.00  | -0.02 | 0.00  |
| 58 | 1 | 0.02  | -0.07 | 0.03  | -0.02 | 0.07  | -0.04 | 0.01  | -0.02 | 0.01  |
| 59 | 8 | 0.00  | 0.00  | 0.00  | 0.00  | 0.00  | 0.00  | 0.00  | 0.00  | 0.00  |
| 60 | 8 | 0.00  | 0.00  | 0.00  | 0.00  | 0.00  | 0.00  | 0.00  | 0.00  | 0.00  |
| 61 | 8 | 0.00  | 0.00  | 0.00  | 0.00  | 0.00  | 0.00  | 0.00  | 0.00  | 0.00  |
| 62 | 6 | -0.01 | -0.01 | 0.00  | -0.01 | -0.01 | 0.00  | 0.00  | 0.00  | 0.00  |
| 63 | 6 | 0.02  | 0.00  | -0.02 | 0.02  | 0.00  | -0.02 | 0.00  | 0.00  | 0.00  |
| 64 | 6 | 0.00  | 0.01  | 0.01  | 0.00  | 0.01  | 0.01  | 0.00  | 0.00  | 0.00  |
| 65 | 8 | 0.00  | 0.00  | 0.00  | 0.00  | 0.00  | 0.00  | 0.00  | 0.00  | 0.00  |
| 66 | 1 | -0.06 | -0.12 | 0.00  | -0.06 | -0.12 | 0.00  | -0.01 | -0.01 | 0.00  |
| 67 | 6 | 0.00  | 0.02  | 0.01  | 0.01  | 0.03  | 0.01  | 0.00  | 0.00  | 0.00  |
| 68 | 1 | -0.04 | -0.08 | 0.00  | -0.05 | -0.10 | 0.00  | -0.01 | -0.01 | 0.00  |
| 69 | 1 | 0.01  | -0.14 | 0.01  | 0.01  | -0.18 | 0.02  | 0.00  | -0.03 | 0.00  |
| 70 | 1 | -0.08 | -0.09 | -0.09 | -0.10 | -0.12 | -0.12 | -0.02 | -0.02 | -0.02 |
| 71 | 6 | -0.05 | 0.02  | 0.08  | -0.06 | 0.02  | 0.09  | -0.01 | 0.00  | 0.01  |
| 72 | 1 | 0.09  | -0.11 | -0.32 | 0.11  | -0.14 | -0.38 | 0.02  | -0.02 | -0.05 |
| 73 | 1 | 0.34  | -0.12 | -0.16 | 0.39  | -0.15 | -0.19 | 0.06  | -0.02 | -0.03 |
| 74 | 1 | 0.14  | 0.08  | -0.33 | 0.18  | 0.10  | -0.40 | 0.03  | 0.01  | -0.05 |

154

155

156

A

A

A

|                |           |           |           |
|----------------|-----------|-----------|-----------|
| Frequencies -- | 1419.9277 | 1422.4074 | 1431.8803 |
| Red. masses -- | 1.2925    | 1.2571    | 1.5620    |
| Frc consts --  | 1.5354    | 1.4986    | 1.8869    |
| IR Inten --    | 6.4735    | 42.8712   | 1.9440    |
| Raman Activ -- | 3.5799    | 4.0110    | 2.4203    |
| Depolar (P) -- | 0.6748    | 0.5682    | 0.3447    |
| Depolar (U) -- | 0.8058    | 0.7246    | 0.5127    |

| Atom | AN | X     | Y     | Z     | X     | Y     | Z     | X     | Y     | Z     |
|------|----|-------|-------|-------|-------|-------|-------|-------|-------|-------|
| 1    | 6  | 0.00  | 0.00  | 0.01  | 0.01  | 0.00  | -0.01 | 0.03  | -0.01 | 0.00  |
| 2    | 6  | 0.01  | 0.00  | -0.01 | -0.01 | 0.00  | 0.01  | -0.01 | 0.00  | 0.01  |
| 3    | 6  | 0.02  | 0.01  | 0.00  | -0.01 | 0.00  | 0.00  | -0.04 | -0.02 | 0.00  |
| 4    | 6  | -0.01 | 0.00  | 0.00  | 0.01  | 0.00  | -0.01 | 0.00  | 0.01  | 0.00  |
| 5    | 6  | 0.01  | 0.00  | 0.00  | -0.01 | 0.02  | 0.02  | 0.05  | -0.04 | -0.04 |
| 6    | 6  | -0.01 | -0.01 | 0.02  | 0.00  | 0.00  | 0.01  | -0.01 | 0.01  | 0.00  |
| 7    | 8  | 0.00  | 0.00  | 0.00  | 0.00  | 0.00  | 0.00  | 0.00  | 0.00  | 0.00  |
| 8    | 6  | 0.00  | 0.01  | 0.00  | -0.01 | -0.01 | -0.01 | -0.03 | 0.00  | -0.06 |

|    |   |       |       |       |       |       |       |       |       |       |
|----|---|-------|-------|-------|-------|-------|-------|-------|-------|-------|
| 9  | 6 | 0.01  | 0.01  | 0.00  | 0.00  | -0.01 | -0.01 | 0.05  | -0.06 | -0.03 |
| 10 | 1 | -0.02 | -0.04 | 0.01  | 0.05  | 0.09  | -0.02 | -0.19 | 0.20  | 0.14  |
| 11 | 8 | 0.00  | 0.00  | 0.00  | 0.00  | 0.00  | 0.00  | 0.00  | 0.01  | 0.01  |
| 12 | 6 | 0.00  | 0.00  | 0.00  | 0.00  | -0.01 | 0.01  | 0.00  | 0.00  | 0.02  |
| 13 | 1 | 0.03  | -0.04 | 0.05  | -0.03 | 0.10  | -0.11 | -0.14 | 0.08  | -0.08 |
| 14 | 6 | 0.02  | 0.03  | 0.01  | 0.01  | 0.03  | 0.00  | 0.00  | 0.00  | 0.00  |
| 15 | 8 | 0.00  | 0.00  | 0.00  | 0.00  | 0.00  | 0.00  | 0.00  | 0.00  | 0.00  |
| 16 | 6 | 0.04  | -0.01 | 0.03  | -0.03 | 0.01  | -0.02 | 0.02  | 0.00  | 0.04  |
| 17 | 1 | -0.13 | 0.06  | -0.20 | 0.08  | -0.04 | 0.13  | -0.05 | -0.03 | -0.08 |
| 18 | 1 | -0.22 | 0.12  | -0.07 | 0.16  | -0.07 | 0.04  | -0.06 | 0.09  | -0.04 |
| 19 | 1 | -0.20 | -0.06 | -0.12 | 0.13  | 0.04  | 0.07  | -0.02 | -0.06 | -0.13 |
| 20 | 6 | 0.00  | 0.00  | 0.00  | -0.01 | 0.01  | 0.01  | -0.07 | 0.04  | 0.07  |
| 21 | 1 | 0.01  | -0.01 | -0.02 | 0.06  | 0.00  | -0.05 | 0.55  | -0.08 | -0.49 |
| 22 | 6 | 0.02  | -0.01 | 0.02  | -0.02 | 0.02  | -0.03 | -0.01 | 0.00  | 0.00  |
| 23 | 1 | -0.02 | 0.05  | -0.12 | 0.02  | -0.08 | 0.16  | 0.02  | 0.03  | 0.05  |
| 24 | 1 | -0.04 | 0.11  | -0.07 | 0.06  | -0.15 | 0.09  | 0.07  | -0.01 | -0.02 |
| 25 | 1 | -0.11 | 0.02  | -0.11 | 0.17  | -0.04 | 0.15  | 0.02  | -0.02 | 0.00  |
| 26 | 6 | 0.02  | 0.00  | 0.00  | 0.01  | -0.01 | -0.01 | 0.00  | -0.02 | -0.01 |
| 27 | 1 | -0.03 | -0.02 | 0.04  | -0.06 | 0.01  | 0.02  | -0.08 | 0.08  | -0.01 |
| 28 | 1 | -0.08 | 0.03  | -0.03 | -0.05 | 0.03  | -0.01 | 0.01  | 0.02  | 0.02  |
| 29 | 6 | 0.00  | 0.01  | 0.00  | 0.00  | -0.01 | 0.00  | 0.00  | 0.01  | 0.01  |
| 30 | 1 | 0.03  | -0.04 | -0.03 | -0.01 | 0.01  | 0.01  | 0.08  | -0.11 | -0.08 |
| 31 | 1 | 0.02  | -0.04 | -0.04 | -0.01 | 0.03  | 0.02  | -0.01 | 0.01  | -0.05 |
| 32 | 6 | 0.00  | -0.01 | -0.02 | 0.00  | 0.01  | 0.02  | 0.00  | 0.01  | 0.02  |
| 33 | 1 | 0.06  | 0.10  | 0.04  | -0.05 | -0.08 | -0.03 | -0.03 | -0.05 | -0.02 |
| 34 | 6 | -0.02 | -0.01 | 0.02  | 0.02  | 0.01  | -0.02 | 0.01  | 0.01  | -0.01 |
| 35 | 1 | 0.08  | 0.07  | -0.05 | -0.06 | -0.06 | 0.04  | -0.05 | -0.03 | 0.02  |
| 36 | 6 | 0.01  | -0.01 | 0.03  | -0.02 | 0.01  | -0.07 | 0.01  | 0.00  | 0.01  |
| 37 | 1 | -0.04 | 0.08  | -0.14 | 0.09  | -0.17 | 0.29  | -0.06 | 0.02  | -0.05 |
| 38 | 1 | -0.08 | -0.05 | -0.16 | 0.16  | 0.09  | 0.32  | -0.03 | 0.00  | -0.05 |
| 39 | 1 | 0.03  | 0.03  | -0.14 | -0.05 | -0.05 | 0.31  | 0.01  | -0.02 | -0.08 |
| 40 | 6 | -0.04 | 0.00  | -0.02 | 0.02  | 0.01  | 0.00  | 0.07  | 0.01  | 0.03  |
| 41 | 1 | 0.17  | 0.00  | 0.07  | -0.13 | -0.01 | -0.03 | -0.29 | 0.01  | -0.10 |
| 42 | 6 | 0.02  | 0.04  | -0.09 | 0.02  | 0.02  | -0.07 | 0.00  | -0.01 | 0.00  |
| 43 | 1 | -0.20 | -0.22 | 0.29  | -0.15 | -0.16 | 0.21  | -0.03 | 0.02  | 0.01  |
| 44 | 1 | -0.12 | 0.04  | 0.39  | -0.07 | 0.03  | 0.29  | 0.02  | 0.00  | -0.03 |
| 45 | 1 | 0.07  | -0.20 | 0.34  | 0.06  | -0.13 | 0.26  | 0.02  | 0.05  | 0.00  |
| 46 | 6 | -0.01 | 0.01  | 0.00  | 0.02  | -0.03 | 0.00  | -0.05 | 0.07  | 0.01  |
| 47 | 1 | 0.03  | -0.02 | 0.00  | -0.06 | 0.04  | -0.03 | 0.15  | -0.09 | 0.05  |
| 48 | 6 | 0.01  | -0.01 | 0.01  | 0.01  | 0.01  | 0.01  | 0.01  | -0.02 | -0.01 |
| 49 | 1 | -0.01 | 0.04  | -0.03 | -0.04 | 0.01  | -0.04 | 0.05  | 0.04  | 0.03  |
| 50 | 1 | -0.05 | 0.00  | 0.00  | -0.06 | -0.01 | -0.03 | 0.02  | 0.02  | 0.04  |
| 51 | 6 | -0.03 | 0.00  | -0.02 | -0.02 | -0.01 | -0.02 | 0.00  | 0.00  | 0.00  |
| 52 | 1 | 0.17  | 0.00  | 0.07  | 0.11  | 0.02  | 0.07  | -0.01 | 0.01  | 0.00  |
| 53 | 6 | -0.02 | -0.01 | -0.01 | -0.01 | -0.01 | -0.01 | 0.00  | 0.00  | 0.00  |
| 54 | 1 | 0.03  | 0.00  | 0.03  | 0.03  | 0.00  | 0.02  | -0.01 | 0.00  | -0.01 |
| 55 | 6 | 0.01  | 0.01  | 0.00  | 0.00  | 0.01  | 0.00  | 0.00  | 0.00  | 0.00  |
| 56 | 1 | 0.01  | -0.02 | 0.02  | 0.01  | -0.01 | 0.01  | 0.00  | 0.01  | 0.00  |
| 57 | 6 | 0.00  | -0.02 | 0.00  | 0.00  | -0.01 | 0.00  | 0.00  | 0.00  | 0.00  |
| 58 | 1 | 0.01  | -0.02 | 0.01  | 0.01  | -0.02 | 0.01  | -0.01 | 0.00  | -0.01 |
| 59 | 8 | 0.00  | -0.01 | 0.00  | 0.00  | 0.00  | 0.00  | 0.00  | 0.01  | -0.01 |
| 60 | 8 | 0.00  | 0.00  | 0.00  | 0.00  | 0.01  | 0.00  | 0.00  | 0.00  | 0.00  |

|    |   |       |       |       |       |       |       |       |       |       |
|----|---|-------|-------|-------|-------|-------|-------|-------|-------|-------|
| 61 | 8 | 0.00  | 0.00  | 0.00  | 0.00  | 0.00  | -0.01 | 0.00  | -0.01 | 0.02  |
| 62 | 6 | 0.00  | -0.01 | 0.00  | 0.00  | 0.00  | 0.00  | 0.00  | 0.01  | 0.00  |
| 63 | 6 | 0.00  | 0.00  | 0.00  | 0.00  | 0.00  | 0.00  | 0.00  | 0.00  | 0.00  |
| 64 | 6 | 0.00  | 0.00  | 0.00  | 0.00  | 0.00  | 0.00  | 0.00  | 0.00  | 0.00  |
| 65 | 8 | 0.00  | 0.00  | 0.00  | 0.00  | 0.00  | 0.00  | 0.00  | 0.00  | 0.00  |
| 66 | 1 | -0.01 | -0.02 | 0.00  | -0.01 | -0.02 | 0.00  | 0.01  | 0.01  | 0.00  |
| 67 | 6 | 0.00  | 0.00  | 0.00  | 0.00  | 0.01  | 0.00  | 0.00  | 0.00  | 0.00  |
| 68 | 1 | -0.01 | -0.02 | 0.00  | -0.01 | -0.02 | 0.00  | 0.00  | 0.00  | 0.00  |
| 69 | 1 | 0.00  | -0.03 | 0.00  | 0.00  | -0.04 | 0.01  | 0.00  | -0.01 | 0.01  |
| 70 | 1 | -0.01 | -0.02 | -0.02 | -0.02 | -0.02 | -0.02 | -0.02 | 0.00  | 0.00  |
| 71 | 6 | -0.01 | 0.00  | 0.01  | -0.01 | 0.00  | 0.02  | 0.00  | 0.00  | 0.00  |
| 72 | 1 | 0.02  | -0.02 | -0.06 | 0.02  | -0.03 | -0.09 | 0.00  | 0.00  | -0.01 |
| 73 | 1 | 0.06  | -0.03 | -0.03 | 0.09  | -0.03 | -0.04 | 0.00  | 0.02  | 0.00  |
| 74 | 1 | 0.02  | 0.01  | -0.07 | 0.04  | 0.02  | -0.08 | 0.01  | 0.00  | 0.02  |

157

158

159

A

A

A

|                |           |           |           |
|----------------|-----------|-----------|-----------|
| Frequencies -- | 1432.8322 | 1442.8169 | 1463.5075 |
| Red. masses -- | 2.7537    | 1.8145    | 1.3419    |
| Frc consts --  | 3.3309    | 2.2255    | 1.6934    |
| IR Inten --    | 8.2540    | 5.3126    | 2.5457    |
| Raman Activ -- | 5.7044    | 6.5726    | 1.0126    |
| Depolar (P) -- | 0.4024    | 0.2285    | 0.6324    |
| Depolar (U) -- | 0.5739    | 0.3720    | 0.7748    |

| Atom | AN | X     | Y     | Z     | X     | Y     | Z     | X     | Y     | Z     |
|------|----|-------|-------|-------|-------|-------|-------|-------|-------|-------|
| 1    | 6  | -0.01 | 0.01  | 0.00  | 0.00  | -0.02 | -0.01 | 0.04  | 0.01  | 0.03  |
| 2    | 6  | 0.00  | 0.00  | 0.00  | 0.00  | 0.01  | 0.01  | 0.00  | 0.00  | 0.00  |
| 3    | 6  | -0.01 | 0.00  | 0.00  | 0.10  | 0.07  | -0.01 | 0.00  | 0.00  | 0.00  |
| 4    | 6  | -0.03 | 0.02  | 0.01  | -0.03 | 0.00  | 0.00  | 0.00  | 0.00  | 0.00  |
| 5    | 6  | 0.16  | -0.13 | -0.13 | 0.03  | -0.01 | -0.01 | 0.00  | 0.00  | 0.00  |
| 6    | 6  | -0.03 | 0.03  | 0.02  | -0.01 | -0.02 | 0.01  | 0.00  | 0.00  | 0.00  |
| 7    | 8  | 0.00  | 0.00  | 0.00  | 0.00  | 0.00  | 0.00  | 0.00  | 0.00  | 0.00  |
| 8    | 6  | 0.02  | 0.00  | 0.04  | -0.01 | 0.00  | -0.03 | -0.01 | 0.02  | -0.02 |
| 9    | 6  | -0.03 | 0.04  | 0.02  | 0.02  | -0.03 | -0.02 | -0.03 | 0.07  | 0.01  |
| 10   | 1  | 0.09  | -0.13 | -0.08 | -0.06 | 0.13  | 0.05  | 0.08  | -0.24 | -0.10 |
| 11   | 8  | 0.00  | -0.01 | -0.01 | 0.00  | 0.00  | 0.01  | 0.00  | 0.00  | 0.00  |
| 12   | 6  | 0.00  | -0.01 | -0.01 | 0.01  | 0.00  | 0.01  | -0.01 | -0.01 | -0.01 |
| 13   | 1  | 0.05  | -0.01 | -0.01 | -0.10 | 0.03  | -0.04 | 0.11  | -0.03 | 0.02  |
| 14   | 6  | 0.00  | 0.00  | 0.00  | 0.00  | 0.00  | 0.00  | 0.00  | 0.00  | 0.00  |
| 15   | 8  | 0.00  | 0.00  | 0.00  | 0.00  | 0.00  | 0.00  | 0.00  | 0.00  | 0.00  |
| 16   | 6  | -0.01 | 0.00  | -0.02 | 0.00  | 0.00  | 0.01  | 0.00  | -0.01 | 0.02  |
| 17   | 1  | 0.03  | 0.02  | 0.04  | 0.00  | -0.01 | 0.00  | 0.01  | -0.02 | 0.02  |
| 18   | 1  | 0.02  | -0.05 | 0.02  | 0.02  | 0.02  | 0.00  | 0.00  | 0.12  | -0.08 |
| 19   | 1  | 0.00  | 0.03  | 0.07  | 0.02  | -0.01 | -0.03 | 0.02  | -0.05 | -0.13 |
| 20   | 6  | 0.04  | -0.02 | -0.04 | -0.03 | 0.03  | 0.03  | -0.04 | -0.13 | 0.00  |
| 21   | 1  | -0.34 | 0.06  | 0.30  | 0.21  | -0.10 | -0.21 | 0.32  | 0.78  | 0.00  |
| 22   | 6  | 0.01  | 0.00  | 0.01  | -0.02 | 0.02  | -0.02 | -0.03 | -0.01 | -0.02 |
| 23   | 1  | -0.02 | -0.01 | -0.05 | 0.01  | -0.05 | 0.11  | 0.10  | 0.14  | 0.13  |
| 24   | 1  | -0.05 | 0.03  | 0.00  | 0.04  | -0.13 | 0.09  | 0.16  | -0.07 | -0.02 |
| 25   | 1  | -0.03 | 0.01  | -0.02 | 0.12  | -0.02 | 0.12  | -0.01 | 0.03  | 0.07  |
| 26   | 6  | 0.02  | -0.02 | 0.00  | 0.02  | 0.04  | 0.03  | 0.00  | 0.00  | 0.00  |
| 27   | 1  | -0.02 | 0.10  | -0.03 | 0.20  | -0.11 | 0.00  | 0.02  | 0.01  | -0.02 |
| 28   | 1  | 0.00  | 0.07  | 0.03  | 0.00  | -0.01 | -0.01 | 0.01  | 0.01  | 0.01  |

|    |   |       |       |       |       |       |       |       |       |       |
|----|---|-------|-------|-------|-------|-------|-------|-------|-------|-------|
| 29 | 6 | 0.00  | 0.00  | -0.01 | 0.00  | 0.00  | 0.00  | 0.00  | 0.00  | 0.01  |
| 30 | 1 | -0.05 | 0.05  | 0.04  | 0.03  | -0.04 | -0.03 | 0.09  | 0.01  | -0.05 |
| 31 | 1 | 0.01  | -0.02 | 0.02  | 0.00  | 0.00  | -0.01 | -0.03 | 0.04  | -0.11 |
| 32 | 6 | 0.00  | -0.01 | -0.01 | 0.00  | 0.00  | 0.01  | 0.00  | 0.00  | 0.00  |
| 33 | 1 | 0.02  | 0.03  | 0.01  | -0.01 | -0.02 | -0.01 | 0.01  | 0.02  | 0.01  |
| 34 | 6 | -0.01 | 0.00  | 0.01  | 0.01  | 0.00  | -0.01 | 0.00  | -0.01 | 0.00  |
| 35 | 1 | 0.02  | 0.02  | -0.01 | -0.01 | -0.01 | 0.00  | 0.00  | 0.00  | -0.01 |
| 36 | 6 | 0.01  | -0.01 | -0.05 | 0.00  | 0.00  | -0.03 | 0.00  | 0.00  | 0.00  |
| 37 | 1 | -0.02 | -0.17 | 0.21  | 0.02  | -0.06 | 0.08  | -0.02 | -0.02 | 0.02  |
| 38 | 1 | -0.03 | 0.16  | 0.25  | 0.03  | 0.04  | 0.11  | 0.00  | 0.02  | 0.04  |
| 39 | 1 | -0.01 | 0.03  | 0.16  | -0.01 | 0.00  | 0.13  | 0.00  | -0.01 | 0.00  |
| 40 | 6 | 0.00  | 0.01  | 0.00  | -0.18 | -0.02 | -0.08 | -0.01 | 0.00  | 0.00  |
| 41 | 1 | -0.03 | -0.01 | 0.01  | 0.73  | -0.02 | 0.24  | 0.04  | 0.00  | 0.02  |
| 42 | 6 | 0.01  | 0.00  | -0.01 | 0.00  | 0.00  | 0.02  | 0.00  | 0.00  | 0.00  |
| 43 | 1 | -0.03 | 0.01  | 0.03  | 0.04  | 0.05  | -0.06 | 0.00  | 0.04  | -0.03 |
| 44 | 1 | -0.05 | 0.00  | 0.04  | 0.01  | -0.01 | -0.11 | -0.05 | 0.00  | -0.03 |
| 45 | 1 | 0.01  | -0.02 | 0.01  | -0.02 | 0.03  | -0.08 | -0.01 | -0.03 | 0.00  |
| 46 | 6 | -0.15 | 0.21  | 0.02  | -0.02 | 0.03  | 0.00  | 0.00  | 0.00  | 0.00  |
| 47 | 1 | 0.44  | -0.25 | 0.15  | 0.05  | -0.03 | 0.02  | -0.01 | 0.00  | 0.00  |
| 48 | 6 | 0.02  | -0.07 | -0.01 | 0.00  | -0.01 | 0.00  | 0.00  | 0.00  | 0.00  |
| 49 | 1 | 0.16  | 0.16  | 0.06  | 0.02  | 0.01  | 0.02  | 0.00  | 0.00  | 0.00  |
| 50 | 1 | 0.05  | 0.08  | 0.15  | 0.02  | 0.01  | 0.02  | 0.00  | 0.00  | 0.00  |
| 51 | 6 | -0.01 | 0.01  | -0.01 | 0.00  | 0.01  | 0.00  | 0.00  | 0.00  | 0.00  |
| 52 | 1 | 0.04  | 0.00  | 0.00  | 0.03  | -0.03 | -0.02 | 0.00  | 0.00  | 0.00  |
| 53 | 6 | 0.01  | 0.00  | 0.01  | 0.00  | 0.00  | 0.00  | 0.00  | 0.00  | 0.00  |
| 54 | 1 | -0.01 | -0.01 | -0.01 | 0.00  | 0.00  | 0.00  | 0.00  | 0.00  | 0.00  |
| 55 | 6 | 0.00  | 0.00  | 0.00  | 0.00  | 0.00  | 0.00  | 0.00  | 0.00  | 0.00  |
| 56 | 1 | -0.01 | 0.02  | -0.01 | 0.00  | 0.00  | 0.00  | 0.00  | 0.00  | 0.00  |
| 57 | 6 | 0.01  | -0.01 | 0.01  | 0.00  | 0.00  | 0.00  | 0.00  | 0.00  | 0.00  |
| 58 | 1 | -0.03 | 0.00  | -0.03 | 0.00  | 0.00  | 0.00  | 0.00  | 0.00  | 0.00  |
| 59 | 8 | 0.00  | 0.00  | 0.00  | 0.00  | -0.04 | 0.03  | 0.00  | 0.00  | 0.00  |
| 60 | 8 | 0.00  | 0.00  | 0.00  | 0.00  | 0.00  | 0.00  | 0.00  | 0.00  | 0.00  |
| 61 | 8 | -0.02 | -0.04 | 0.06  | 0.00  | -0.01 | 0.01  | 0.00  | 0.00  | 0.00  |
| 62 | 6 | 0.00  | 0.00  | 0.00  | 0.00  | 0.01  | 0.00  | 0.00  | -0.01 | 0.00  |
| 63 | 6 | 0.00  | 0.00  | 0.00  | 0.00  | 0.00  | 0.00  | 0.00  | 0.00  | 0.00  |
| 64 | 6 | 0.00  | 0.00  | 0.00  | 0.00  | 0.00  | 0.00  | 0.00  | 0.00  | 0.00  |
| 65 | 8 | 0.00  | 0.00  | 0.00  | 0.00  | 0.00  | 0.00  | 0.00  | 0.00  | 0.00  |
| 66 | 1 | 0.00  | -0.01 | 0.00  | 0.00  | 0.01  | 0.00  | 0.00  | -0.01 | 0.00  |
| 67 | 6 | 0.00  | 0.00  | 0.00  | 0.00  | 0.00  | 0.00  | 0.00  | 0.00  | 0.00  |
| 68 | 1 | 0.00  | 0.00  | 0.00  | 0.00  | 0.00  | 0.00  | 0.00  | -0.01 | 0.00  |
| 69 | 1 | 0.00  | 0.00  | 0.00  | 0.00  | 0.00  | 0.00  | 0.00  | 0.01  | -0.01 |
| 70 | 1 | 0.00  | 0.00  | 0.00  | -0.01 | 0.00  | 0.00  | 0.02  | 0.00  | -0.01 |
| 71 | 6 | 0.00  | 0.00  | 0.00  | 0.00  | 0.00  | 0.00  | 0.00  | 0.00  | 0.00  |
| 72 | 1 | 0.01  | -0.02 | 0.01  | 0.00  | 0.00  | 0.00  | 0.00  | 0.00  | 0.03  |
| 73 | 1 | -0.01 | 0.00  | 0.01  | -0.01 | 0.01  | 0.01  | -0.01 | -0.03 | 0.00  |
| 74 | 1 | 0.02  | 0.01  | 0.00  | 0.00  | 0.00  | 0.02  | -0.01 | 0.00  | -0.02 |

160

161

162

A

A

A

|                |           |           |           |
|----------------|-----------|-----------|-----------|
| Frequencies -- | 1479.4465 | 1480.7784 | 1483.6563 |
| Red. masses -- | 1.0755    | 1.0464    | 1.0747    |
| Frc consts --  | 1.3870    | 1.3518    | 1.3939    |
| IR Inten --    | 7.9832    | 10.3318   | 0.4862    |

| Raman Activ -- |    |       |       | 38.0149 |       | 13.2799 |       |       | 7.8554 |       |  |
|----------------|----|-------|-------|---------|-------|---------|-------|-------|--------|-------|--|
| Depolar (P) -- |    |       |       | 0.5096  |       | 0.7248  |       |       | 0.7477 |       |  |
| Depolar (U) -- |    |       |       | 0.6751  |       | 0.8405  |       |       | 0.8557 |       |  |
| Atom           | AN | X     | Y     | Z       | X     | Y       | Z     | X     | Y      | Z     |  |
| 1              | 6  | 0.00  | 0.00  | 0.00    | 0.00  | 0.00    | 0.00  | 0.00  | 0.00   | 0.00  |  |
| 2              | 6  | 0.00  | 0.00  | 0.00    | 0.00  | 0.00    | 0.00  | 0.00  | 0.00   | 0.00  |  |
| 3              | 6  | 0.00  | 0.00  | 0.00    | 0.00  | 0.00    | 0.00  | 0.00  | 0.00   | 0.00  |  |
| 4              | 6  | 0.00  | 0.00  | 0.00    | 0.00  | 0.00    | 0.00  | 0.00  | 0.00   | 0.00  |  |
| 5              | 6  | 0.00  | 0.00  | 0.00    | 0.00  | 0.00    | 0.00  | 0.01  | 0.00   | -0.01 |  |
| 6              | 6  | 0.00  | 0.00  | 0.00    | 0.00  | 0.00    | 0.00  | -0.01 | 0.01   | -0.01 |  |
| 7              | 8  | 0.00  | 0.00  | 0.00    | 0.00  | 0.00    | 0.00  | 0.00  | 0.00   | 0.00  |  |
| 8              | 6  | 0.00  | 0.00  | 0.00    | 0.00  | 0.00    | 0.00  | 0.00  | 0.00   | 0.00  |  |
| 9              | 6  | 0.00  | 0.00  | 0.00    | 0.00  | 0.00    | 0.00  | 0.00  | 0.00   | 0.00  |  |
| 10             | 1  | -0.01 | 0.01  | 0.01    | 0.00  | 0.01    | 0.00  | 0.01  | -0.01  | -0.01 |  |
| 11             | 8  | 0.00  | 0.00  | 0.00    | 0.00  | 0.00    | 0.00  | 0.00  | 0.00   | 0.00  |  |
| 12             | 6  | 0.00  | 0.00  | 0.00    | 0.00  | 0.00    | 0.00  | 0.00  | 0.00   | 0.00  |  |
| 13             | 1  | -0.01 | 0.03  | -0.03   | -0.02 | 0.01    | -0.01 | 0.01  | -0.01  | 0.01  |  |
| 14             | 6  | 0.00  | 0.00  | 0.00    | 0.00  | 0.00    | 0.00  | 0.00  | 0.00   | 0.00  |  |
| 15             | 8  | 0.00  | 0.00  | 0.00    | 0.00  | 0.00    | 0.00  | 0.00  | 0.00   | 0.00  |  |
| 16             | 6  | 0.00  | 0.00  | 0.00    | 0.00  | 0.00    | 0.00  | 0.00  | 0.00   | 0.00  |  |
| 17             | 1  | 0.00  | -0.01 | 0.00    | 0.00  | 0.00    | 0.00  | 0.00  | -0.01  | 0.00  |  |
| 18             | 1  | 0.00  | 0.00  | 0.00    | 0.00  | 0.00    | 0.00  | 0.00  | 0.01   | -0.01 |  |
| 19             | 1  | 0.00  | 0.00  | 0.00    | 0.00  | 0.00    | 0.00  | 0.00  | 0.00   | -0.01 |  |
| 20             | 6  | 0.00  | 0.00  | 0.00    | 0.00  | 0.00    | 0.00  | 0.00  | -0.01  | 0.00  |  |
| 21             | 1  | 0.00  | -0.01 | 0.00    | 0.00  | -0.01   | 0.00  | 0.02  | 0.04   | 0.00  |  |
| 22             | 6  | 0.00  | 0.00  | 0.00    | 0.00  | 0.00    | 0.00  | 0.00  | 0.00   | 0.00  |  |
| 23             | 1  | 0.00  | 0.00  | 0.00    | 0.00  | 0.00    | 0.00  | 0.01  | 0.02   | 0.00  |  |
| 24             | 1  | 0.00  | 0.00  | 0.00    | 0.00  | 0.00    | 0.00  | 0.00  | -0.01  | 0.01  |  |
| 25             | 1  | 0.00  | 0.00  | 0.00    | 0.00  | 0.00    | 0.00  | -0.01 | 0.01   | 0.02  |  |
| 26             | 6  | 0.00  | 0.00  | 0.00    | 0.00  | 0.00    | 0.00  | 0.05  | 0.04   | 0.00  |  |
| 27             | 1  | -0.02 | -0.01 | 0.02    | -0.02 | -0.01   | 0.02  | -0.35 | -0.26  | 0.36  |  |
| 28             | 1  | -0.02 | -0.02 | -0.02   | -0.02 | -0.01   | -0.02 | -0.35 | -0.28  | -0.34 |  |
| 29             | 6  | 0.00  | 0.00  | 0.00    | 0.00  | 0.00    | 0.00  | 0.00  | 0.00   | 0.00  |  |
| 30             | 1  | -0.01 | -0.01 | 0.00    | 0.00  | 0.00    | 0.00  | 0.01  | 0.00   | 0.00  |  |
| 31             | 1  | 0.00  | 0.00  | 0.01    | 0.00  | 0.00    | 0.00  | 0.00  | 0.00   | -0.01 |  |
| 32             | 6  | 0.00  | 0.00  | 0.00    | 0.00  | 0.00    | 0.00  | 0.00  | 0.00   | 0.00  |  |
| 33             | 1  | 0.00  | 0.00  | 0.00    | 0.00  | 0.00    | 0.00  | 0.00  | 0.00   | 0.00  |  |
| 34             | 6  | 0.00  | 0.00  | 0.00    | 0.00  | 0.00    | 0.00  | 0.00  | 0.00   | 0.00  |  |
| 35             | 1  | 0.00  | 0.00  | 0.00    | 0.00  | 0.00    | 0.00  | 0.00  | 0.00   | 0.00  |  |
| 36             | 6  | 0.00  | 0.00  | 0.00    | 0.00  | 0.00    | 0.00  | 0.00  | 0.00   | 0.00  |  |
| 37             | 1  | -0.01 | 0.00  | 0.00    | 0.00  | 0.00    | 0.00  | 0.01  | -0.01  | 0.02  |  |
| 38             | 1  | 0.00  | 0.00  | 0.00    | 0.00  | 0.00    | 0.00  | -0.02 | 0.02   | 0.01  |  |
| 39             | 1  | 0.00  | -0.01 | 0.00    | 0.00  | 0.01    | 0.00  | 0.00  | 0.03   | 0.00  |  |
| 40             | 6  | 0.00  | 0.00  | 0.      |       |         |       |       |        |       |  |

|    |   |       |       |       |       |       |       |       |       |       |
|----|---|-------|-------|-------|-------|-------|-------|-------|-------|-------|
| 49 | 1 | 0.01  | -0.04 | 0.03  | 0.00  | -0.02 | 0.02  | 0.01  | -0.01 | 0.01  |
| 50 | 1 | 0.05  | -0.02 | -0.02 | 0.02  | -0.01 | -0.01 | 0.03  | 0.00  | 0.00  |
| 51 | 6 | 0.00  | 0.00  | 0.00  | 0.00  | 0.00  | 0.00  | 0.01  | 0.00  | 0.00  |
| 52 | 1 | 0.00  | 0.00  | 0.00  | 0.00  | 0.00  | 0.00  | -0.04 | 0.01  | -0.01 |
| 53 | 6 | 0.00  | 0.00  | 0.00  | 0.00  | 0.00  | 0.00  | 0.00  | 0.00  | 0.00  |
| 54 | 1 | 0.00  | 0.00  | 0.00  | 0.00  | 0.00  | 0.00  | 0.00  | 0.00  | 0.00  |
| 55 | 6 | 0.00  | 0.00  | 0.00  | 0.00  | 0.00  | 0.00  | 0.00  | 0.00  | 0.00  |
| 56 | 1 | 0.00  | 0.00  | 0.00  | 0.00  | 0.00  | 0.00  | 0.00  | -0.01 | 0.00  |
| 57 | 6 | 0.00  | 0.00  | 0.00  | 0.00  | 0.00  | 0.00  | 0.00  | 0.00  | 0.00  |
| 58 | 1 | 0.00  | 0.00  | 0.00  | 0.00  | 0.00  | 0.00  | -0.01 | 0.00  | 0.00  |
| 59 | 8 | 0.00  | 0.00  | 0.00  | 0.00  | 0.00  | 0.00  | 0.00  | 0.00  | 0.00  |
| 60 | 8 | 0.00  | 0.00  | 0.00  | 0.00  | 0.00  | 0.00  | 0.00  | 0.00  | 0.00  |
| 61 | 8 | 0.00  | 0.00  | 0.00  | 0.00  | 0.00  | 0.00  | 0.00  | 0.00  | 0.00  |
| 62 | 6 | 0.00  | 0.00  | 0.00  | 0.00  | 0.00  | 0.00  | 0.00  | 0.00  | 0.00  |
| 63 | 6 | -0.03 | -0.02 | 0.03  | -0.01 | 0.00  | 0.00  | 0.00  | 0.00  | 0.00  |
| 64 | 6 | 0.01  | 0.01  | 0.00  | -0.01 | 0.01  | -0.01 | 0.00  | 0.00  | 0.00  |
| 65 | 8 | 0.00  | 0.00  | -0.01 | 0.00  | 0.00  | 0.00  | 0.00  | 0.00  | 0.00  |
| 66 | 1 | 0.02  | 0.06  | -0.01 | 0.03  | -0.03 | 0.02  | -0.01 | -0.01 | 0.00  |
| 67 | 6 | -0.02 | 0.01  | 0.04  | -0.04 | 0.03  | -0.02 | 0.00  | 0.00  | 0.00  |
| 68 | 1 | -0.24 | -0.33 | -0.06 | 0.41  | -0.34 | 0.41  | 0.00  | 0.06  | -0.02 |
| 69 | 1 | 0.14  | 0.22  | -0.47 | -0.14 | 0.22  | 0.31  | -0.01 | -0.04 | 0.03  |
| 70 | 1 | 0.49  | 0.03  | -0.05 | 0.30  | -0.26 | -0.35 | -0.07 | 0.01  | 0.03  |
| 71 | 6 | 0.03  | 0.01  | 0.01  | 0.00  | 0.01  | -0.01 | 0.00  | 0.00  | 0.00  |
| 72 | 1 | -0.13 | 0.20  | 0.03  | 0.10  | -0.14 | 0.15  | 0.01  | -0.01 | 0.00  |
| 73 | 1 | 0.12  | -0.22 | -0.09 | -0.12 | -0.13 | 0.03  | -0.01 | 0.00  | 0.00  |
| 74 | 1 | -0.28 | -0.10 | -0.22 | 0.10  | 0.05  | -0.05 | 0.01  | 0.01  | 0.00  |

163

164

165

A

A

A

|                |           |           |           |
|----------------|-----------|-----------|-----------|
| Frequencies -- | 1485.5561 | 1488.4029 | 1493.8031 |
| Red. masses -- | 1.0973    | 1.0685    | 1.0543    |
| Frc consts --  | 1.4267    | 1.3946    | 1.3862    |
| IR Inten --    | 2.9100    | 0.9776    | 7.9977    |
| Raman Activ -- | 5.2938    | 2.8672    | 8.2947    |
| Depolar (P) -- | 0.7480    | 0.7218    | 0.7083    |
| Depolar (U) -- | 0.8558    | 0.8384    | 0.8292    |

| Atom | AN | X     | Y    | Z    | X     | Y     | Z     | X     | Y     | Z    |
|------|----|-------|------|------|-------|-------|-------|-------|-------|------|
| 1    | 6  | 0.00  | 0.00 | 0.00 | 0.02  | 0.02  | 0.00  | -0.01 | 0.00  | 0.01 |
| 2    | 6  | 0.00  | 0.00 | 0.00 | 0.00  | 0.00  | 0.00  | 0.00  | 0.00  | 0.00 |
| 3    | 6  | 0.00  | 0.00 | 0.00 | 0.00  | 0.00  | 0.00  | 0.00  | 0.00  | 0.00 |
| 4    | 6  | 0.00  | 0.00 | 0.00 | -0.01 | -0.01 | 0.00  | -0.01 | 0.00  | 0.00 |
| 5    | 6  | -0.01 | 0.01 | 0.01 | 0.01  | 0.00  | -0.01 | 0.01  | 0.00  | 0.00 |
| 6    | 6  | 0.00  | 0.01 | 0.01 | 0.00  | 0.00  | 0.00  | 0.00  | 0.00  | 0.00 |
| 7    | 8  | 0.00  | 0.00 | 0.00 | 0.00  | 0.00  | 0.00  | 0.00  | 0.00  | 0.00 |
| 8    | 6  | 0.00  | 0.00 | 0.00 | 0.01  | 0.00  | -0.02 | -0.01 | -0.02 | 0.00 |
| 9    | 6  | 0.00  | 0.00 | 0.00 | 0.00  | 0.01  | 0.00  | 0.00  | 0.00  | 0.00 |
| 10   | 1  | -0.01 | 0.01 | 0.00 | -0.01 | -0.02 | 0.00  | -0.01 | 0.00  | 0.00 |
| 11   | 8  | 0.00  | 0.00 | 0.00 | 0.00  | 0.00  | 0.00  | 0.00  | 0.00  | 0.00 |
| 12   | 6  | 0.00  | 0.00 | 0.00 | 0.00  | 0.00  | 0.00  | 0.00  | 0.00  | 0.00 |
| 13   | 1  | 0.00  | 0.01 | 0.00 | 0.02  | -0.01 | 0.02  | -0.01 | -0.01 | 0.01 |
| 14   | 6  | 0.00  | 0.00 | 0.00 | 0.00  | 0.00  | 0.00  | 0.00  | 0.00  | 0.00 |
| 15   | 8  | 0.00  | 0.00 | 0.00 | 0.00  | 0.00  | 0.00  | 0.00  | 0.00  | 0.00 |
| 16   | 6  | 0.00  | 0.00 | 0.00 | 0.01  | 0.00  | -0.01 | -0.01 | -0.04 | 0.01 |



|    |   |       |       |       |       |       |       |       |       |       |
|----|---|-------|-------|-------|-------|-------|-------|-------|-------|-------|
| 17 | 1 | 0.00  | 0.01  | 0.00  | -0.08 | 0.08  | -0.11 | 0.09  | 0.38  | 0.30  |
| 18 | 1 | 0.00  | -0.01 | 0.00  | 0.00  | -0.17 | 0.12  | 0.37  | 0.28  | -0.22 |
| 19 | 1 | 0.00  | 0.00  | 0.01  | -0.08 | 0.07  | 0.21  | -0.21 | -0.08 | -0.16 |
| 20 | 6 | 0.00  | 0.00  | 0.00  | -0.02 | -0.03 | 0.01  | 0.01  | 0.01  | -0.01 |
| 21 | 1 | 0.02  | 0.00  | -0.01 | 0.11  | 0.13  | -0.04 | -0.03 | -0.02 | 0.02  |
| 22 | 6 | 0.00  | 0.00  | 0.00  | 0.02  | 0.01  | 0.00  | -0.01 | 0.02  | 0.02  |
| 23 | 1 | -0.01 | -0.02 | -0.01 | -0.17 | -0.22 | -0.22 | -0.04 | -0.18 | 0.14  |
| 24 | 1 | -0.02 | 0.00  | 0.00  | -0.36 | 0.01  | 0.09  | 0.13  | 0.17  | -0.16 |
| 25 | 1 | 0.02  | -0.01 | 0.00  | 0.17  | -0.02 | 0.17  | 0.14  | -0.23 | -0.28 |
| 26 | 6 | 0.00  | 0.00  | 0.00  | 0.00  | 0.00  | 0.00  | 0.00  | 0.00  | 0.00  |
| 27 | 1 | -0.02 | -0.03 | 0.03  | -0.01 | 0.00  | 0.01  | 0.00  | 0.01  | -0.01 |
| 28 | 1 | -0.03 | -0.01 | -0.02 | 0.00  | -0.01 | -0.01 | 0.00  | 0.01  | 0.01  |
| 29 | 6 | 0.00  | 0.00  | 0.00  | 0.00  | 0.00  | 0.01  | 0.00  | 0.00  | 0.01  |
| 30 | 1 | 0.00  | 0.00  | 0.00  | 0.05  | 0.00  | -0.03 | 0.05  | 0.02  | -0.03 |
| 31 | 1 | 0.00  | 0.00  | 0.00  | -0.01 | 0.01  | -0.05 | -0.02 | 0.03  | -0.05 |
| 32 | 6 | 0.00  | 0.00  | 0.00  | 0.00  | 0.00  | 0.01  | 0.00  | 0.00  | 0.00  |
| 33 | 1 | 0.00  | 0.00  | 0.00  | 0.00  | 0.01  | 0.01  | -0.02 | -0.02 | -0.01 |
| 34 | 6 | 0.00  | 0.00  | 0.00  | 0.00  | 0.00  | 0.00  | 0.01  | 0.01  | 0.00  |
| 35 | 1 | 0.00  | 0.00  | 0.00  | -0.01 | -0.01 | 0.00  | -0.01 | -0.01 | 0.01  |
| 36 | 6 | -0.01 | 0.00  | 0.00  | -0.02 | -0.03 | 0.00  | -0.02 | 0.00  | 0.00  |
| 37 | 1 | 0.07  | 0.03  | -0.01 | 0.45  | 0.13  | 0.02  | 0.18  | 0.11  | -0.07 |
| 38 | 1 | 0.02  | -0.04 | -0.05 | -0.07 | -0.10 | -0.24 | 0.11  | -0.12 | -0.11 |
| 39 | 1 | 0.00  | 0.03  | 0.04  | 0.01  | 0.38  | 0.23  | -0.02 | 0.03  | 0.15  |
| 40 | 6 | 0.00  | 0.00  | 0.00  | 0.00  | 0.00  | 0.00  | 0.00  | 0.00  | 0.00  |
| 41 | 1 | -0.01 | 0.00  | 0.00  | -0.02 | 0.00  | -0.01 | 0.00  | 0.00  | 0.00  |
| 42 | 6 | 0.00  | 0.01  | 0.01  | 0.00  | 0.00  | 0.00  | 0.00  | 0.00  | 0.00  |
| 43 | 1 | 0.14  | -0.01 | -0.11 | -0.02 | 0.04  | 0.00  | 0.00  | -0.03 | 0.02  |
| 44 | 1 | -0.12 | 0.00  | 0.04  | -0.03 | 0.00  | -0.03 | 0.04  | 0.00  | 0.01  |
| 45 | 1 | -0.08 | -0.16 | -0.12 | 0.01  | 0.00  | 0.03  | 0.00  | 0.03  | -0.01 |
| 46 | 6 | 0.00  | -0.02 | -0.01 | 0.00  | 0.01  | 0.00  | 0.00  | 0.01  | 0.00  |
| 47 | 1 | -0.02 | -0.02 | 0.00  | 0.00  | 0.01  | 0.00  | 0.01  | 0.00  | 0.00  |
| 48 | 6 | 0.05  | -0.06 | 0.01  | 0.00  | 0.01  | 0.00  | 0.00  | 0.00  | 0.00  |
| 49 | 1 | -0.07 | 0.55  | -0.35 | 0.01  | -0.05 | 0.03  | 0.00  | -0.01 | 0.01  |
| 50 | 1 | -0.52 | 0.29  | 0.28  | 0.05  | -0.03 | -0.03 | 0.02  | -0.01 | 0.00  |
| 51 | 6 | 0.01  | 0.00  | 0.01  | 0.00  | 0.00  | 0.00  | 0.00  | 0.00  | 0.00  |
| 52 | 1 | -0.03 | 0.01  | -0.01 | 0.00  | 0.00  | 0.00  | 0.00  | 0.00  | 0.00  |
| 53 | 6 | 0.00  | 0.00  | 0.00  | 0.00  | 0.00  | 0.00  | 0.00  | 0.00  | 0.00  |
| 54 | 1 | 0.00  | 0.00  | 0.00  | 0.00  | 0.00  | 0.00  | 0.00  | 0.00  | 0.00  |
| 55 | 6 | 0.00  | 0.00  | 0.00  | 0.00  | 0.00  | 0.00  | 0.00  | 0.00  | 0.00  |
| 56 | 1 | 0.00  | -0.01 | 0.00  | 0.00  | 0.00  | 0.00  | 0.00  | 0.00  | 0.00  |
| 57 | 6 | 0.00  | 0.00  | 0.00  | 0.00  | 0.00  | 0.00  | 0.00  | 0.00  | 0.00  |
| 58 | 1 | 0.00  | 0.00  | 0.01  | 0.00  | 0.00  | 0.00  | 0.00  | 0.00  | 0.00  |
| 59 | 8 | 0.00  | 0.00  | 0.00  | 0.00  | 0.00  | 0.00  | 0.00  | 0.00  | 0.00  |
| 60 | 8 | 0.00  | 0.00  | 0.00  | 0.00  | 0.00  | 0.00  | 0.00  | 0.00  | 0.00  |
| 61 | 8 | 0.00  | 0.01  | 0.00  | 0.00  | 0.00  | 0.00  | 0.00  | 0.00  | 0.00  |
| 62 | 6 | 0.00  | 0.00  | 0.00  | 0.00  | 0.00  | 0.00  | 0.00  | 0.00  | 0.00  |
| 63 | 6 | 0.00  | 0.00  | 0.00  | 0.00  | 0.00  | 0.00  | 0.00  | 0.00  | 0.00  |
| 64 | 6 | 0.00  | 0.00  | 0.00  | 0.00  | 0.00  | 0.00  | 0.00  | 0.00  | 0.00  |
| 65 | 8 | 0.00  | 0.00  | 0.00  | 0.00  | 0.00  | 0.00  | 0.00  | 0.00  | 0.00  |
| 66 | 1 | 0.00  | 0.01  | 0.00  | 0.00  | 0.00  | 0.00  | 0.00  | 0.00  | 0.00  |
| 67 | 6 | 0.00  | 0.00  | 0.00  | 0.00  | 0.00  | 0.00  | 0.00  | 0.00  | 0.00  |
| 68 | 1 | -0.01 | -0.06 | 0.02  | -0.01 | 0.00  | -0.01 | 0.00  | 0.00  | 0.00  |

|                |    |           |       |       |           |       |       |           |       |       |
|----------------|----|-----------|-------|-------|-----------|-------|-------|-----------|-------|-------|
| 69             | 1  | 0.01      | 0.04  | -0.04 | 0.01      | 0.00  | -0.01 | 0.00      | 0.00  | 0.00  |
| 70             | 1  | 0.07      | -0.01 | -0.03 | 0.00      | 0.00  | 0.01  | 0.00      | 0.00  | 0.00  |
| 71             | 6  | 0.00      | 0.00  | 0.00  | 0.00      | 0.00  | 0.00  | 0.00      | 0.00  | 0.00  |
| 72             | 1  | -0.01     | 0.01  | -0.02 | 0.01      | -0.01 | 0.01  | 0.00      | 0.00  | 0.00  |
| 73             | 1  | 0.01      | 0.02  | 0.00  | -0.01     | -0.01 | 0.00  | 0.00      | 0.00  | 0.00  |
| 74             | 1  | -0.01     | 0.00  | 0.02  | 0.01      | 0.00  | -0.01 | 0.00      | 0.00  | 0.00  |
|                |    | 166       |       |       | 167       |       |       | 168       |       |       |
|                |    | A         |       |       | A         |       |       | A         |       |       |
| Frequencies -- |    | 1495.1554 |       |       | 1499.3956 |       |       | 1500.0800 |       |       |
| Red. masses -- |    | 1.0649    |       |       | 1.0598    |       |       | 1.0646    |       |       |
| Frc consts --  |    | 1.4026    |       |       | 1.4038    |       |       | 1.4114    |       |       |
| IR Inten --    |    | 14.6001   |       |       | 5.1940    |       |       | 8.6733    |       |       |
| Raman Activ -- |    | 0.8011    |       |       | 7.4533    |       |       | 4.2416    |       |       |
| Depolar (P) -- |    | 0.7319    |       |       | 0.4789    |       |       | 0.7019    |       |       |
| Depolar (U) -- |    | 0.8452    |       |       | 0.6476    |       |       | 0.8248    |       |       |
| Atom           | AN | X         | Y     | Z     | X         | Y     | Z     | X         | Y     | Z     |
| 1              | 6  | 0.00      | 0.00  | 0.00  | 0.00      | 0.00  | 0.00  | 0.01      | 0.01  | 0.01  |
| 2              | 6  | 0.00      | 0.00  | 0.00  | 0.00      | 0.00  | 0.00  | 0.00      | 0.00  | 0.00  |
| 3              | 6  | 0.00      | 0.00  | 0.00  | 0.00      | 0.00  | 0.00  | 0.00      | 0.00  | 0.00  |
| 4              | 6  | 0.00      | 0.00  | 0.00  | 0.00      | 0.00  | 0.00  | 0.01      | 0.01  | 0.00  |
| 5              | 6  | 0.00      | 0.01  | 0.01  | 0.00      | 0.00  | 0.00  | -0.01     | 0.00  | 0.00  |
| 6              | 6  | -0.03     | -0.02 | -0.02 | -0.01     | 0.02  | 0.01  | 0.00      | 0.00  | 0.00  |
| 7              | 8  | 0.00      | 0.00  | 0.00  | 0.00      | 0.00  | 0.00  | 0.00      | 0.00  | 0.00  |
| 8              | 6  | 0.00      | 0.00  | 0.00  | 0.00      | 0.00  | 0.00  | 0.01      | -0.01 | -0.03 |
| 9              | 6  | 0.00      | 0.00  | 0.00  | 0.00      | 0.00  | 0.00  | 0.00      | 0.01  | 0.00  |
| 10             | 1  | 0.01      | -0.01 | -0.01 | -0.01     | 0.01  | 0.00  | -0.01     | -0.04 | 0.00  |
| 11             | 8  | 0.00      | 0.00  | 0.00  | 0.00      | 0.00  | 0.00  | 0.00      | 0.00  | 0.00  |
| 12             | 6  | 0.00      | 0.00  | 0.00  | 0.00      | 0.00  | 0.00  | 0.00      | -0.01 | 0.00  |
| 13             | 1  | 0.02      | -0.02 | 0.02  | -0.02     | 0.01  | -0.01 | 0.00      | 0.01  | -0.02 |
| 14             | 6  | 0.00      | -0.01 | 0.00  | 0.00      | 0.00  | 0.00  | 0.00      | 0.00  | 0.00  |
| 15             | 8  | 0.00      | 0.00  | 0.00  | 0.00      | 0.00  | 0.00  | 0.00      | 0.00  | 0.00  |
| 16             | 6  | 0.00      | 0.00  | 0.00  | 0.00      | 0.00  | 0.01  | 0.02      | -0.01 | -0.03 |
| 17             | 1  | -0.01     | 0.01  | -0.02 | 0.02      | -0.07 | 0.01  | -0.14     | 0.33  | -0.12 |
| 18             | 1  | -0.01     | -0.03 | 0.02  | -0.03     | 0.03  | -0.02 | 0.12      | -0.27 | 0.18  |
| 19             | 1  | -0.01     | 0.01  | 0.04  | 0.06      | -0.02 | -0.06 | -0.27     | 0.12  | 0.40  |
| 20             | 6  | 0.00      | -0.01 | 0.00  | 0.00      | 0.00  | 0.00  | -0.02     | -0.02 | 0.01  |
| 21             | 1  | 0.01      | 0.04  | 0.01  | 0.01      | -0.02 | -0.01 | 0.09      | 0.09  | -0.04 |
| 22             | 6  | 0.00      | 0.00  | 0.00  | 0.00      | 0.00  | 0.00  | 0.00      | 0.01  | 0.01  |
| 23             | 1  | -0.01     | 0.00  | -0.02 | 0.01      | 0.03  | 0.00  | -0.09     | -0.19 | -0.01 |
| 24             | 1  | -0.03     | -0.01 | 0.01  | 0.01      | -0.02 | 0.02  | -0.07     | 0.14  | -0.08 |
| 25             | 1  | 0.00      | 0.01  | 0.02  | -0.02     | 0.02  | 0.02  | 0.14      | -0.15 | -0.12 |
| 26             | 6  | -0.02     | -0.02 | 0.00  | -0.02     | -0.03 | 0.00  | 0.00      | 0.00  | 0.00  |
| 27             | 1  | 0.16      | 0.18  | -0.20 | 0.15      | 0.12  | -0.17 | 0.01      | 0.00  | -0.01 |
| 28             | 1  | 0.19      | 0.14  | 0.18  | 0.15      | 0.14  | 0.15  | 0.00      | 0.01  | 0.01  |
| 29             | 6  | 0.00      | 0.00  | 0.00  | 0.00      | 0.00  | 0.00  | -0.01     | 0.00  | 0.01  |
| 30             | 1  | 0.01      | 0.01  | -0.01 | -0.02     | -0.01 | 0.01  | 0.09      | 0.02  | -0.05 |
| 31             | 1  | 0.00      | 0.00  | -0.02 | 0.00      | 0.00  | 0.02  | -0.02     | 0.01  | -0.10 |
| 32             | 6  | 0.00      | 0.00  | 0.00  | 0.00      | 0.00  | 0.00  | 0.00      | 0.00  | 0.01  |
| 33             | 1  | 0.00      | 0.00  | 0.00  | 0.00      | 0.00  | 0.00  | 0.00      | 0.01  | 0.01  |
| 34             | 6  | 0.00      | 0.00  | 0.00  | 0.00      | 0.00  | 0.00  | 0.00      | 0.00  | 0.00  |
| 35             | 1  | 0.00      | 0.00  | 0.00  | 0.00      | 0.00  | 0.00  | -0.01     | -0.01 | 0.01  |
| 36             | 6  | 0.00      | 0.00  | 0.00  | 0.00      | 0.00  | 0.00  | 0.02      | 0.02  | 0.00  |

|    |   |       |       |       |       |       |       |       |       |       |
|----|---|-------|-------|-------|-------|-------|-------|-------|-------|-------|
| 37 | 1 | 0.00  | 0.00  | 0.00  | 0.07  | 0.03  | -0.01 | -0.34 | -0.11 | -0.01 |
| 38 | 1 | -0.01 | 0.01  | 0.00  | 0.00  | -0.03 | -0.04 | 0.01  | 0.10  | 0.17  |
| 39 | 1 | 0.00  | 0.01  | -0.01 | 0.00  | 0.05  | 0.04  | 0.00  | -0.25 | -0.20 |
| 40 | 6 | -0.01 | -0.01 | 0.00  | 0.00  | 0.00  | 0.00  | 0.00  | 0.00  | 0.00  |
| 41 | 1 | 0.02  | 0.00  | 0.00  | -0.01 | 0.00  | -0.01 | 0.02  | 0.00  | 0.01  |
| 42 | 6 | -0.03 | -0.01 | -0.02 | -0.01 | 0.04  | 0.00  | 0.00  | 0.01  | 0.00  |
| 43 | 1 | -0.13 | -0.27 | 0.25  | 0.39  | -0.39 | -0.14 | 0.08  | -0.06 | -0.04 |
| 44 | 1 | 0.57  | 0.03  | 0.02  | 0.01  | 0.04  | 0.36  | -0.02 | 0.01  | 0.06  |
| 45 | 1 | 0.12  | 0.50  | 0.01  | -0.19 | -0.29 | -0.36 | -0.04 | -0.07 | -0.07 |
| 46 | 6 | 0.00  | -0.01 | 0.00  | 0.00  | 0.00  | 0.00  | 0.00  | 0.00  | 0.00  |
| 47 | 1 | 0.00  | 0.00  | -0.01 | 0.00  | 0.00  | -0.01 | 0.00  | 0.00  | 0.00  |
| 48 | 6 | 0.01  | -0.02 | 0.00  | -0.01 | 0.01  | 0.00  | 0.00  | 0.00  | 0.00  |
| 49 | 1 | -0.02 | 0.14  | -0.09 | 0.01  | -0.10 | 0.06  | 0.00  | -0.01 | 0.00  |
| 50 | 1 | -0.12 | 0.08  | 0.08  | 0.09  | -0.05 | -0.05 | 0.01  | 0.00  | -0.01 |
| 51 | 6 | 0.01  | 0.00  | 0.01  | 0.00  | 0.00  | 0.00  | 0.00  | 0.00  | 0.00  |
| 52 | 1 | 0.00  | -0.01 | -0.01 | 0.00  | 0.00  | 0.00  | 0.00  | 0.00  | 0.00  |
| 53 | 6 | 0.01  | 0.00  | 0.01  | 0.00  | 0.00  | 0.00  | 0.00  | 0.00  | 0.00  |
| 54 | 1 | 0.00  | -0.01 | 0.00  | 0.00  | 0.00  | 0.00  | 0.00  | 0.00  | 0.00  |
| 55 | 6 | -0.01 | 0.00  | -0.01 | 0.00  | 0.00  | 0.00  | 0.00  | 0.00  | 0.00  |
| 56 | 1 | 0.00  | -0.02 | 0.00  | 0.00  | 0.01  | 0.00  | 0.00  | 0.00  | 0.00  |
| 57 | 6 | 0.00  | 0.00  | 0.00  | 0.00  | 0.00  | 0.00  | 0.00  | 0.00  | 0.00  |
| 58 | 1 | 0.00  | 0.00  | 0.01  | -0.01 | 0.00  | 0.00  | 0.00  | 0.00  | 0.00  |
| 59 | 8 | 0.00  | 0.00  | 0.00  | 0.00  | 0.00  | 0.00  | 0.00  | 0.00  | 0.00  |
| 60 | 8 | 0.00  | 0.00  | 0.00  | 0.00  | 0.00  | 0.00  | 0.00  | 0.00  | 0.00  |
| 61 | 8 | 0.00  | 0.00  | 0.00  | 0.00  | 0.00  | 0.00  | 0.00  | 0.00  | 0.00  |
| 62 | 6 | 0.00  | -0.01 | 0.00  | 0.00  | 0.00  | 0.00  | 0.00  | 0.00  | 0.00  |
| 63 | 6 | 0.00  | 0.00  | 0.00  | 0.00  | 0.01  | 0.00  | 0.00  | 0.00  | 0.00  |
| 64 | 6 | 0.00  | 0.00  | 0.00  | 0.00  | 0.00  | 0.00  | 0.00  | 0.00  | 0.00  |
| 65 | 8 | 0.00  | 0.00  | 0.00  | 0.00  | 0.00  | 0.00  | 0.00  | 0.00  | 0.00  |
| 66 | 1 | 0.00  | -0.01 | 0.00  | 0.00  | 0.00  | 0.00  | 0.00  | 0.00  | 0.00  |
| 67 | 6 | 0.00  | 0.00  | 0.00  | 0.00  | -0.01 | -0.01 | 0.00  | 0.00  | 0.00  |
| 68 | 1 | 0.02  | 0.03  | 0.01  | 0.03  | 0.07  | 0.00  | 0.02  | 0.02  | 0.01  |
| 69 | 1 | -0.01 | -0.01 | 0.04  | -0.02 | -0.04 | 0.07  | -0.01 | -0.01 | 0.04  |
| 70 | 1 | -0.04 | 0.00  | 0.01  | -0.09 | 0.00  | 0.02  | -0.03 | 0.00  | 0.00  |
| 71 | 6 | 0.00  | 0.00  | 0.00  | 0.01  | 0.01  | 0.00  | 0.00  | 0.00  | 0.00  |
| 72 | 1 | -0.01 | 0.01  | 0.01  | -0.04 | 0.04  | 0.11  | -0.03 | 0.04  | 0.01  |
| 73 | 1 | 0.00  | -0.02 | 0.00  | -0.02 | -0.18 | -0.03 | 0.02  | -0.03 | -0.01 |
| 74 | 1 | -0.02 | -0.01 | -0.02 | -0.10 | -0.03 | -0.14 | -0.06 | -0.02 | -0.03 |

169

170

171

A

A

A

|                |           |           |           |
|----------------|-----------|-----------|-----------|
| Frequencies -- | 1501.8390 | 1502.6558 | 1503.6728 |
| Red. masses -- | 1.0507    | 1.0522    | 1.0581    |
| Frc consts --  | 1.3964    | 1.3998    | 1.4095    |
| IR Inten --    | 18.3628   | 10.3493   | 9.8386    |
| Raman Activ -- | 9.7062    | 13.5653   | 5.7612    |
| Depolar (P) -- | 0.6414    | 0.6182    | 0.7493    |
| Depolar (U) -- | 0.7815    | 0.7641    | 0.8567    |

| Atom | AN | X    | Y    | Z    | X    | Y    | Z    | X     | Y    | Z    |
|------|----|------|------|------|------|------|------|-------|------|------|
| 1    | 6  | 0.00 | 0.00 | 0.00 | 0.00 | 0.00 | 0.00 | -0.01 | 0.00 | 0.01 |
| 2    | 6  | 0.00 | 0.00 | 0.00 | 0.00 | 0.00 | 0.00 | 0.00  | 0.00 | 0.00 |
| 3    | 6  | 0.00 | 0.00 | 0.00 | 0.00 | 0.00 | 0.00 | 0.00  | 0.00 | 0.00 |
| 4    | 6  | 0.00 | 0.00 | 0.00 | 0.00 | 0.00 | 0.00 | -0.02 | 0.01 | 0.01 |



|    |   |       |       |       |       |       |       |      |       |       |
|----|---|-------|-------|-------|-------|-------|-------|------|-------|-------|
| 57 | 6 | 0.00  | 0.00  | 0.00  | 0.00  | 0.00  | 0.00  | 0.00 | 0.00  | 0.00  |
| 58 | 1 | 0.00  | 0.00  | 0.00  | 0.00  | 0.00  | 0.00  | 0.00 | 0.00  | 0.00  |
| 59 | 8 | 0.00  | 0.00  | 0.00  | 0.00  | 0.00  | 0.00  | 0.00 | 0.00  | 0.00  |
| 60 | 8 | 0.00  | 0.00  | 0.00  | 0.00  | 0.00  | 0.00  | 0.00 | 0.00  | 0.00  |
| 61 | 8 | 0.00  | 0.00  | 0.00  | 0.00  | 0.00  | 0.00  | 0.00 | 0.00  | 0.00  |
| 62 | 6 | 0.00  | 0.00  | 0.00  | 0.00  | 0.00  | 0.00  | 0.00 | 0.00  | 0.00  |
| 63 | 6 | 0.01  | 0.02  | 0.01  | -0.02 | 0.00  | 0.00  | 0.00 | 0.00  | 0.00  |
| 64 | 6 | 0.00  | 0.00  | -0.01 | 0.02  | 0.02  | 0.00  | 0.00 | 0.00  | 0.00  |
| 65 | 8 | 0.00  | 0.00  | 0.00  | 0.00  | 0.00  | 0.00  | 0.00 | 0.00  | 0.00  |
| 66 | 1 | 0.00  | 0.00  | -0.01 | -0.01 | -0.02 | -0.01 | 0.00 | 0.00  | 0.00  |
| 67 | 6 | 0.01  | -0.01 | -0.02 | 0.01  | -0.01 | 0.02  | 0.00 | 0.00  | 0.00  |
| 68 | 1 | 0.15  | 0.21  | 0.04  | -0.19 | 0.04  | -0.15 | 0.00 | -0.01 | 0.00  |
| 69 | 1 | -0.08 | -0.09 | 0.26  | 0.07  | -0.06 | -0.19 | 0.00 | 0.01  | 0.00  |
| 70 | 1 | -0.24 | -0.01 | 0.03  | -0.03 | 0.06  | 0.09  | 0.01 | 0.00  | 0.00  |
| 71 | 6 | 0.04  | 0.02  | 0.01  | -0.02 | 0.04  | -0.02 | 0.00 | 0.00  | 0.00  |
| 72 | 1 | -0.19 | 0.25  | 0.25  | 0.27  | -0.40 | 0.42  | 0.00 | 0.00  | -0.03 |
| 73 | 1 | 0.03  | -0.44 | -0.09 | -0.33 | -0.40 | 0.06  | 0.01 | 0.04  | 0.00  |
| 74 | 1 | -0.40 | -0.14 | -0.35 | 0.32  | 0.14  | -0.22 | 0.01 | 0.00  | 0.03  |

172

173

174

A

A

A

|                |           |           |           |
|----------------|-----------|-----------|-----------|
| Frequencies -- | 1515.2442 | 1518.4514 | 1531.0536 |
| Red. masses -- | 1.0531    | 1.0600    | 1.0935    |
| Frc consts --  | 1.4246    | 1.4400    | 1.5103    |
| IR Inten --    | 1.5508    | 7.8736    | 4.3738    |
| Raman Activ -- | 2.0919    | 13.9129   | 6.1013    |
| Depolar (P) -- | 0.7480    | 0.6798    | 0.7286    |
| Depolar (U) -- | 0.8558    | 0.8094    | 0.8430    |

| Atom | AN | X     | Y     | Z     | X     | Y     | Z     | X     | Y     | Z     |
|------|----|-------|-------|-------|-------|-------|-------|-------|-------|-------|
| 1    | 6  | -0.01 | 0.00  | 0.01  | -0.01 | -0.02 | -0.01 | 0.01  | 0.00  | 0.00  |
| 2    | 6  | 0.00  | 0.00  | 0.00  | 0.00  | 0.00  | 0.00  | 0.00  | 0.00  | 0.00  |
| 3    | 6  | 0.00  | 0.01  | 0.00  | 0.00  | 0.00  | 0.00  | 0.00  | 0.00  | 0.00  |
| 4    | 6  | 0.01  | -0.02 | -0.01 | -0.01 | 0.00  | 0.00  | 0.00  | 0.00  | 0.00  |
| 5    | 6  | -0.01 | 0.01  | 0.01  | 0.00  | 0.00  | 0.00  | 0.00  | 0.00  | 0.00  |
| 6    | 6  | 0.00  | 0.00  | 0.00  | 0.00  | 0.00  | 0.00  | 0.00  | 0.00  | 0.00  |
| 7    | 8  | 0.00  | 0.00  | 0.00  | 0.00  | 0.00  | 0.00  | 0.00  | 0.00  | 0.00  |
| 8    | 6  | 0.00  | 0.00  | 0.00  | 0.01  | -0.01 | -0.01 | 0.00  | -0.01 | -0.02 |
| 9    | 6  | 0.00  | 0.00  | 0.00  | 0.00  | 0.00  | 0.00  | -0.01 | 0.00  | 0.00  |
| 10   | 1  | -0.04 | -0.02 | 0.02  | -0.01 | 0.03  | 0.01  | 0.02  | -0.01 | -0.01 |
| 11   | 8  | 0.00  | 0.00  | 0.00  | 0.00  | 0.00  | 0.00  | 0.00  | 0.00  | -0.01 |
| 12   | 6  | 0.00  | 0.00  | 0.00  | 0.00  | 0.00  | 0.00  | 0.00  | 0.00  | 0.00  |
| 13   | 1  | 0.02  | 0.02  | -0.02 | -0.01 | 0.01  | 0.00  | 0.01  | -0.01 | 0.01  |
| 14   | 6  | 0.00  | 0.00  | 0.00  | 0.00  | 0.00  | 0.00  | 0.00  | 0.00  | 0.00  |
| 15   | 8  | 0.00  | 0.00  | 0.00  | 0.00  | 0.00  | 0.00  | 0.00  | 0.00  | 0.00  |
| 16   | 6  | 0.00  | 0.01  | -0.01 | 0.01  | -0.02 | -0.02 | 0.01  | -0.01 | 0.00  |
| 17   | 1  | -0.03 | -0.04 | -0.06 | -0.08 | 0.35  | -0.01 | -0.04 | 0.19  | 0.00  |
| 18   | 1  | -0.05 | -0.09 | 0.06  | 0.16  | -0.10 | 0.05  | 0.10  | 0.00  | 0.00  |
| 19   | 1  | 0.03  | 0.03  | 0.08  | -0.30 | 0.05  | 0.24  | -0.16 | 0.01  | 0.07  |
| 20   | 6  | 0.00  | 0.00  | 0.00  | 0.01  | 0.02  | 0.00  | -0.01 | -0.01 | 0.01  |
| 21   | 1  | 0.00  | -0.02 | -0.01 | -0.04 | -0.08 | 0.01  | 0.09  | 0.10  | -0.04 |
| 22   | 6  | -0.03 | 0.01  | 0.01  | -0.01 | -0.03 | -0.02 | 0.00  | -0.01 | 0.00  |
| 23   | 1  | 0.08  | -0.01 | 0.24  | 0.23  | 0.46  | 0.07  | 0.02  | 0.06  | -0.01 |
| 24   | 1  | 0.31  | 0.10  | -0.16 | 0.25  | -0.21 | 0.08  | 0.00  | -0.03 | 0.02  |

|    |   |       |       |       |       |       |       |       |       |       |
|----|---|-------|-------|-------|-------|-------|-------|-------|-------|-------|
| 25 | 1 | 0.02  | -0.15 | -0.27 | -0.32 | 0.28  | 0.13  | -0.03 | 0.04  | 0.05  |
| 26 | 6 | 0.00  | 0.00  | 0.00  | 0.00  | 0.00  | 0.00  | 0.00  | 0.00  | 0.00  |
| 27 | 1 | 0.01  | 0.00  | -0.01 | 0.00  | 0.01  | 0.00  | 0.00  | 0.00  | 0.00  |
| 28 | 1 | 0.01  | 0.01  | 0.01  | 0.01  | 0.00  | 0.00  | 0.00  | 0.00  | 0.00  |
| 29 | 6 | 0.00  | 0.00  | 0.00  | -0.01 | -0.01 | 0.01  | 0.03  | 0.05  | -0.05 |
| 30 | 1 | -0.04 | -0.03 | 0.02  | 0.12  | 0.07  | -0.06 | -0.53 | -0.36 | 0.25  |
| 31 | 1 | 0.02  | -0.02 | 0.05  | -0.03 | 0.03  | -0.13 | 0.19  | -0.21 | 0.57  |
| 32 | 6 | 0.00  | 0.00  | 0.00  | -0.01 | 0.00  | 0.00  | 0.00  | 0.00  | 0.00  |
| 33 | 1 | 0.00  | 0.01  | 0.01  | -0.01 | 0.00  | 0.01  | 0.00  | 0.01  | 0.00  |
| 34 | 6 | 0.00  | 0.00  | 0.00  | 0.01  | 0.01  | 0.00  | 0.00  | 0.00  | 0.00  |
| 35 | 1 | 0.00  | 0.00  | 0.00  | -0.01 | -0.01 | 0.01  | 0.00  | 0.00  | 0.00  |
| 36 | 6 | 0.02  | -0.04 | -0.01 | -0.01 | -0.01 | 0.00  | 0.00  | 0.00  | 0.00  |
| 37 | 1 | 0.11  | -0.15 | 0.26  | 0.14  | 0.05  | 0.00  | 0.00  | 0.01  | -0.01 |
| 38 | 1 | -0.47 | 0.25  | 0.00  | 0.01  | -0.05 | -0.07 | 0.03  | -0.02 | 0.00  |
| 39 | 1 | 0.08  | 0.50  | -0.14 | 0.00  | 0.10  | 0.10  | 0.00  | -0.02 | 0.02  |
| 40 | 6 | 0.00  | 0.00  | 0.00  | 0.00  | 0.00  | 0.00  | 0.00  | 0.00  | 0.00  |
| 41 | 1 | 0.00  | 0.00  | 0.00  | -0.01 | 0.00  | -0.01 | 0.00  | 0.00  | 0.00  |
| 42 | 6 | 0.00  | 0.00  | 0.00  | 0.00  | 0.00  | 0.00  | 0.00  | 0.00  | 0.00  |
| 43 | 1 | 0.00  | 0.00  | 0.00  | 0.00  | 0.00  | 0.00  | 0.00  | -0.01 | 0.00  |
| 44 | 1 | -0.01 | 0.00  | 0.00  | -0.01 | 0.00  | 0.00  | 0.01  | 0.00  | 0.00  |
| 45 | 1 | 0.00  | -0.01 | 0.00  | 0.00  | -0.01 | 0.00  | 0.00  | 0.01  | 0.00  |
| 46 | 6 | 0.01  | -0.01 | 0.00  | 0.00  | 0.00  | 0.00  | 0.00  | 0.00  | 0.00  |
| 47 | 1 | -0.02 | 0.01  | -0.01 | 0.00  | 0.00  | 0.00  | 0.00  | 0.00  | 0.00  |
| 48 | 6 | 0.00  | 0.00  | 0.00  | 0.00  | 0.00  | 0.00  | 0.00  | 0.00  | 0.00  |
| 49 | 1 | -0.01 | 0.00  | -0.01 | 0.00  | 0.00  | 0.00  | 0.00  | 0.00  | 0.00  |
| 50 | 1 | -0.01 | 0.00  | 0.00  | 0.00  | 0.00  | 0.00  | 0.00  | 0.00  | 0.00  |
| 51 | 6 | 0.00  | 0.00  | 0.00  | 0.00  | 0.00  | 0.00  | 0.00  | 0.00  | 0.00  |
| 52 | 1 | 0.00  | 0.00  | 0.00  | 0.00  | 0.00  | 0.00  | 0.00  | 0.00  | 0.00  |
| 53 | 6 | 0.00  | 0.00  | 0.00  | 0.00  | 0.00  | 0.00  | 0.00  | 0.00  | 0.00  |
| 54 | 1 | 0.00  | 0.00  | 0.00  | 0.00  | 0.00  | 0.00  | 0.00  | 0.00  | 0.00  |
| 55 | 6 | 0.00  | 0.00  | 0.00  | 0.00  | 0.00  | 0.00  | 0.00  | 0.00  | 0.00  |
| 56 | 1 | 0.00  | 0.00  | 0.00  | 0.00  | 0.00  | 0.00  | 0.00  | 0.00  | 0.00  |
| 57 | 6 | 0.00  | 0.00  | 0.00  | 0.00  | 0.00  | 0.00  | 0.00  | 0.00  | 0.00  |
| 58 | 1 | 0.00  | 0.00  | 0.00  | 0.00  | 0.00  | 0.00  | 0.00  | 0.00  | 0.00  |
| 59 | 8 | 0.00  | 0.00  | 0.00  | 0.00  | 0.00  | 0.00  | 0.00  | 0.00  | 0.00  |
| 60 | 8 | 0.00  | 0.00  | 0.00  | 0.00  | 0.00  | 0.00  | 0.00  | 0.00  | 0.00  |
| 61 | 8 | 0.00  | 0.00  | 0.00  | 0.00  | 0.00  | 0.00  | 0.00  | 0.00  | 0.00  |
| 62 | 6 | 0.00  | 0.00  | 0.00  | 0.00  | 0.00  | 0.00  | 0.00  | 0.00  | 0.01  |
| 63 | 6 | 0.00  | 0.00  | 0.00  | 0.00  | 0.00  | 0.00  | 0.00  | 0.00  | 0.00  |
| 64 | 6 | 0.00  | 0.00  | 0.00  | 0.00  | 0.00  | 0.00  | 0.00  | 0.00  | 0.00  |
| 65 | 8 | 0.00  | 0.00  | 0.00  | 0.00  | 0.00  | 0.00  | 0.00  | 0.00  | 0.00  |
| 66 | 1 | 0.00  | 0.00  | 0.00  | 0.00  | 0.00  | 0.00  | 0.00  | 0.00  | 0.00  |
| 67 | 6 | 0.00  | 0.00  | 0.00  | 0.00  | 0.00  | 0.00  | 0.00  | 0.00  | 0.00  |
| 68 | 1 | 0.00  | 0.00  | 0.00  | 0.00  | 0.00  | 0.00  | 0.00  | 0.00  | 0.00  |
| 69 | 1 | 0.00  | 0.00  | 0.00  | 0.00  | 0.00  | 0.00  | 0.00  | 0.00  | 0.00  |
| 70 | 1 | 0.00  | 0.00  | 0.00  | 0.00  | 0.00  | 0.00  | 0.00  | 0.00  | 0.00  |
| 71 | 6 | 0.00  | 0.00  | 0.00  | 0.00  | 0.00  | 0.00  | 0.00  | 0.00  | 0.00  |
| 72 | 1 | -0.01 | 0.01  | -0.01 | 0.00  | 0.00  | 0.01  | 0.00  | 0.00  | -0.01 |
| 73 | 1 | 0.01  | 0.01  | 0.00  | 0.00  | -0.01 | 0.00  | 0.00  | 0.01  | 0.00  |
| 74 | 1 | -0.01 | 0.00  | 0.01  | 0.00  | 0.00  | -0.01 | 0.00  | 0.00  | 0.01  |

175

A

176

A

177

A

|                |           |           |           |
|----------------|-----------|-----------|-----------|
| Frequencies -- | 1532.8277 | 1627.2588 | 1655.4051 |
| Red. masses -- | 3.9764    | 5.6863    | 7.0406    |
| Frc consts --  | 5.5047    | 8.8715    | 11.3676   |
| IR Inten --    | 17.3545   | 1.1593    | 20.9946   |
| Raman Activ -- | 52.0428   | 11.2510   | 48.7257   |
| Depolar (P) -- | 0.1637    | 0.2018    | 0.1579    |
| Depolar (U) -- | 0.2813    | 0.3358    | 0.2728    |

  

|    | Atom | AN    | X     | Y     | Z     | X     | Y    | Z     | X     | Y     | Z |
|----|------|-------|-------|-------|-------|-------|------|-------|-------|-------|---|
| 1  | 6    | 0.00  | 0.00  | 0.00  | 0.00  | 0.00  | 0.00 | -0.01 | -0.01 | 0.00  |   |
| 2  | 6    | 0.00  | 0.00  | 0.00  | 0.00  | 0.00  | 0.00 | 0.01  | 0.02  | 0.01  |   |
| 3  | 6    | 0.00  | 0.00  | 0.00  | 0.00  | 0.00  | 0.00 | 0.00  | 0.00  | 0.00  |   |
| 4  | 6    | 0.00  | 0.00  | 0.00  | 0.00  | 0.00  | 0.00 | 0.00  | 0.00  | 0.00  |   |
| 5  | 6    | 0.01  | 0.00  | 0.00  | 0.01  | 0.00  | 0.00 | 0.00  | 0.00  | 0.00  |   |
| 6  | 6    | 0.00  | 0.01  | 0.01  | -0.01 | 0.00  | 0.00 | 0.00  | 0.00  | 0.00  |   |
| 7  | 8    | 0.00  | 0.00  | 0.00  | 0.00  | 0.00  | 0.00 | 0.03  | 0.03  | -0.01 |   |
| 8  | 6    | 0.00  | 0.00  | 0.00  | 0.00  | 0.00  | 0.00 | -0.03 | -0.08 | -0.03 |   |
| 9  | 6    | 0.00  | 0.00  | 0.00  | 0.00  | 0.00  | 0.00 | -0.01 | 0.00  | 0.00  |   |
| 10 | 1    | 0.00  | 0.00  | 0.00  | 0.00  | 0.00  | 0.00 | 0.01  | 0.00  | -0.01 |   |
| 11 | 8    | 0.00  | 0.00  | 0.00  | 0.00  | 0.00  | 0.00 | 0.00  | 0.00  | 0.00  |   |
| 12 | 6    | 0.00  | 0.00  | 0.00  | 0.00  | 0.00  | 0.00 | 0.00  | 0.00  | 0.00  |   |
| 13 | 1    | 0.00  | 0.00  | 0.00  | 0.00  | 0.00  | 0.00 | -0.02 | 0.00  | 0.00  |   |
| 14 | 6    | 0.11  | -0.03 | 0.12  | 0.23  | -0.25 | 0.29 | 0.00  | 0.00  | 0.00  |   |
| 15 | 8    | 0.04  | -0.04 | 0.04  | 0.00  | -0.02 | 0.00 | 0.00  | 0.00  | 0.00  |   |
| 16 | 6    | 0.00  | 0.00  | 0.00  | 0.00  | 0.00  | 0.00 | -0.01 | 0.00  | -0.01 |   |
| 17 | 1    | 0.00  | 0.00  | 0.00  | 0.00  | 0.00  | 0.00 | 0.02  | 0.02  | 0.05  |   |
| 18 | 1    | 0.00  | 0.00  | 0.00  | 0.00  | 0.00  | 0.00 | 0.08  | -0.03 | 0.02  |   |
| 19 | 1    | 0.00  | 0.00  | 0.00  | 0.00  | 0.00  | 0.00 | -0.01 | 0.02  | 0.02  |   |
| 20 | 6    | 0.00  | 0.00  | 0.00  | 0.00  | 0.00  | 0.00 | 0.01  | 0.02  | 0.01  |   |
| 21 | 1    | 0.00  | 0.00  | 0.00  | 0.00  | 0.00  | 0.00 | 0.00  | -0.02 | 0.01  |   |
| 22 | 6    | 0.00  | 0.00  | 0.00  | 0.00  | 0.00  | 0.00 | 0.00  | 0.00  | 0.00  |   |
| 23 | 1    | 0.00  | 0.00  | 0.00  | 0.00  | 0.00  | 0.00 | 0.01  | 0.01  | 0.02  |   |
| 24 | 1    | 0.00  | 0.00  | 0.00  | 0.00  | 0.00  | 0.00 | 0.03  | 0.00  | -0.01 |   |
| 25 | 1    | 0.00  | 0.00  | 0.00  | 0.00  | 0.00  | 0.00 | -0.01 | 0.00  | -0.01 |   |
| 26 | 6    | 0.00  | 0.00  | 0.00  | 0.00  | 0.00  | 0.00 | 0.00  | 0.00  | 0.00  |   |
| 27 | 1    | 0.01  | -0.01 | 0.00  | -0.01 | 0.01  | 0.00 | 0.00  | 0.00  | 0.00  |   |
| 28 | 1    | 0.00  | 0.00  | 0.00  | -0.01 | 0.00  | 0.00 | 0.00  | 0.00  | 0.00  |   |
| 29 | 6    | 0.00  | 0.00  | 0.00  | 0.00  | 0.00  | 0.00 | 0.00  | -0.01 | -0.01 |   |
| 30 | 1    | 0.01  | 0.00  | 0.00  | 0.00  | 0.00  | 0.00 | 0.01  | 0.03  | 0.00  |   |
| 31 | 1    | 0.00  | 0.00  | -0.01 | 0.00  | 0.00  | 0.00 | -0.02 | 0.04  | 0.00  |   |
| 32 | 6    | 0.00  | 0.00  | 0.00  | 0.00  | 0.00  | 0.00 | 0.29  | 0.43  | 0.07  |   |
| 33 | 1    | 0.00  | 0.00  | 0.00  | 0.00  | 0.00  | 0.00 | -0.01 | -0.30 | -0.39 |   |
| 34 | 6    | 0.00  | 0.00  | 0.00  | 0.00  | 0.00  | 0.00 | -0.32 | -0.40 | 0.03  |   |
| 35 | 1    | 0.00  | 0.00  | 0.00  | 0.00  | 0.00  | 0.00 | 0.23  | -0.01 | -0.37 |   |
| 36 | 6    | 0.00  | 0.00  | 0.00  | 0.00  | 0.00  | 0.00 | 0.00  | 0.00  | 0.00  |   |
| 37 | 1    | 0.00  | 0.00  | -0.01 | 0.00  | 0.00  | 0.00 | 0.00  | 0.00  | 0.00  |   |
| 38 | 1    | 0.01  | -0.01 | 0.00  | 0.00  | 0.00  | 0.00 | 0.00  | 0.00  | 0.00  |   |
| 39 | 1    | 0.00  | -0.01 | 0.01  | 0.00  | 0.00  | 0.00 | 0.00  | 0.00  | 0.00  |   |
| 40 | 6    | 0.00  | 0.00  | 0.00  | 0.00  | 0.00  | 0.00 | 0.00  | 0.00  | 0.00  |   |
| 41 | 1    | 0.00  | 0.00  | 0.00  | 0.00  | 0.00  | 0.00 | -0.03 | 0.00  | -0.01 |   |
| 42 | 6    | 0.00  | 0.00  | 0.00  | 0.00  | 0.00  | 0.00 | 0.00  | 0.00  | 0.00  |   |
| 43 | 1    | 0.03  | 0.01  | -0.03 | 0.02  | -0.04 | 0.01 | 0.00  | 0.00  | 0.00  |   |
| 44 | 1    | -0.04 | 0.00  | 0.01  | 0.03  | 0.00  | 0.02 | 0.00  | 0.00  | 0.00  |   |





|    |   |       |       |       |       |       |       |       |       |       |
|----|---|-------|-------|-------|-------|-------|-------|-------|-------|-------|
| 13 | 1 | 0.00  | 0.00  | 0.00  | 0.00  | 0.00  | 0.00  | 0.04  | -0.06 | 0.05  |
| 14 | 6 | 0.00  | 0.00  | 0.00  | 0.00  | 0.00  | 0.00  | 0.00  | 0.00  | 0.00  |
| 15 | 8 | 0.00  | 0.00  | 0.00  | 0.00  | 0.00  | 0.00  | 0.00  | 0.00  | 0.00  |
| 16 | 6 | 0.00  | 0.00  | 0.00  | 0.00  | 0.00  | 0.00  | 0.00  | 0.00  | 0.00  |
| 17 | 1 | 0.00  | 0.00  | 0.00  | 0.00  | 0.00  | 0.00  | 0.00  | 0.00  | 0.00  |
| 18 | 1 | 0.00  | 0.00  | 0.00  | 0.01  | 0.00  | 0.00  | 0.00  | 0.00  | 0.00  |
| 19 | 1 | 0.00  | 0.00  | 0.00  | 0.00  | 0.00  | 0.00  | -0.01 | 0.00  | 0.00  |
| 20 | 6 | 0.00  | 0.00  | 0.00  | 0.00  | -0.03 | -0.02 | 0.00  | 0.00  | 0.00  |
| 21 | 1 | 0.00  | -0.01 | 0.00  | 0.02  | 0.04  | -0.01 | -0.03 | -0.01 | 0.02  |
| 22 | 6 | 0.00  | 0.00  | 0.00  | -0.01 | 0.01  | -0.02 | 0.00  | 0.00  | 0.00  |
| 23 | 1 | 0.00  | 0.00  | 0.00  | 0.02  | 0.04  | 0.03  | 0.00  | 0.00  | 0.00  |
| 24 | 1 | 0.00  | 0.00  | 0.00  | 0.04  | -0.09 | 0.06  | 0.00  | 0.00  | 0.00  |
| 25 | 1 | 0.00  | 0.00  | 0.00  | 0.01  | 0.05  | 0.07  | 0.00  | 0.00  | 0.00  |
| 26 | 6 | 0.00  | 0.00  | 0.00  | 0.00  | -0.01 | 0.00  | 0.00  | 0.00  | 0.00  |
| 27 | 1 | 0.00  | 0.00  | 0.00  | -0.02 | 0.01  | 0.00  | 0.00  | 0.00  | 0.00  |
| 28 | 1 | 0.00  | 0.00  | 0.00  | 0.00  | 0.00  | 0.00  | 0.00  | 0.00  | 0.00  |
| 29 | 6 | 0.00  | 0.00  | 0.00  | 0.00  | 0.00  | 0.00  | 0.00  | 0.00  | 0.01  |
| 30 | 1 | 0.02  | 0.00  | -0.02 | 0.00  | 0.00  | 0.00  | 0.07  | -0.03 | -0.06 |
| 31 | 1 | 0.00  | 0.01  | -0.02 | 0.00  | 0.01  | 0.00  | -0.01 | 0.01  | -0.05 |
| 32 | 6 | 0.00  | 0.00  | 0.00  | -0.02 | -0.02 | 0.00  | 0.00  | 0.00  | 0.00  |
| 33 | 1 | 0.00  | 0.00  | 0.00  | -0.01 | 0.02  | 0.02  | 0.00  | -0.01 | 0.00  |
| 34 | 6 | 0.00  | 0.00  | 0.00  | -0.01 | -0.03 | -0.01 | 0.00  | 0.00  | 0.00  |
| 35 | 1 | 0.00  | 0.00  | 0.00  | 0.19  | 0.16  | -0.13 | 0.00  | 0.00  | 0.00  |
| 36 | 6 | 0.00  | 0.00  | 0.00  | 0.00  | 0.00  | 0.00  | 0.00  | 0.00  | 0.00  |
| 37 | 1 | 0.00  | 0.00  | 0.00  | 0.00  | 0.00  | 0.00  | 0.00  | 0.00  | 0.00  |
| 38 | 1 | 0.00  | 0.00  | 0.00  | 0.00  | 0.00  | 0.00  | 0.00  | 0.00  | 0.00  |
| 39 | 1 | 0.00  | 0.00  | 0.00  | 0.00  | 0.00  | 0.00  | 0.00  | 0.00  | 0.00  |
| 40 | 6 | 0.00  | 0.00  | 0.00  | 0.00  | 0.00  | 0.00  | 0.00  | 0.00  | 0.00  |
| 41 | 1 | 0.00  | 0.00  | 0.00  | -0.15 | -0.03 | -0.04 | -0.01 | 0.00  | 0.00  |
| 42 | 6 | 0.00  | 0.00  | 0.00  | 0.00  | 0.00  | 0.00  | 0.00  | 0.00  | 0.00  |
| 43 | 1 | 0.00  | 0.00  | 0.00  | 0.00  | 0.00  | 0.00  | -0.01 | -0.01 | 0.01  |
| 44 | 1 | -0.01 | 0.00  | 0.01  | 0.01  | 0.00  | 0.00  | 0.00  | 0.00  | 0.02  |
| 45 | 1 | 0.00  | -0.01 | 0.00  | 0.00  | 0.01  | 0.01  | 0.01  | 0.00  | 0.03  |
| 46 | 6 | 0.00  | 0.00  | 0.00  | 0.00  | 0.00  | 0.00  | 0.00  | 0.00  | 0.00  |
| 47 | 1 | 0.00  | 0.00  | 0.00  | 0.00  | 0.00  | 0.00  | 0.00  | 0.00  | -0.01 |
| 48 | 6 | 0.00  | 0.00  | 0.00  | 0.00  | 0.00  | 0.00  | 0.00  | 0.00  | 0.00  |
| 49 | 1 | 0.00  | 0.00  | 0.00  | 0.00  | 0.00  | 0.00  | 0.00  | 0.00  | 0.00  |
| 50 | 1 | 0.00  | 0.00  | 0.00  | 0.00  | 0.00  | 0.00  | 0.00  | 0.00  | 0.00  |
| 51 | 6 | 0.00  | 0.00  | 0.00  | 0.00  | 0.00  | 0.00  | 0.00  | 0.00  | 0.00  |
| 52 | 1 | 0.00  | 0.00  | 0.00  | 0.00  | 0.00  | 0.00  | 0.00  | 0.00  | 0.00  |
| 53 | 6 | 0.00  | 0.00  | 0.00  | 0.00  | 0.00  | 0.00  | 0.00  | 0.00  | 0.00  |
| 54 | 1 | 0.00  | 0.00  | 0.00  | 0.00  | 0.00  | 0.00  | 0.00  | 0.00  | 0.00  |
| 55 | 6 | 0.00  | 0.00  | 0.00  | 0.00  | 0.00  | 0.00  | 0.00  | 0.00  | 0.00  |
| 56 | 1 | 0.00  | 0.00  | 0.00  | 0.00  | 0.00  | 0.00  | 0.00  | 0.00  | 0.00  |
| 57 | 6 | 0.00  | 0.00  | 0.00  | 0.00  | 0.00  | 0.00  | 0.00  | 0.00  | 0.00  |
| 58 | 1 | 0.00  | 0.00  | 0.00  | 0.00  | 0.00  | 0.00  | 0.00  | 0.00  | 0.00  |
| 59 | 8 | 0.00  | 0.00  | 0.00  | 0.00  | 0.00  | 0.00  | 0.00  | 0.00  | 0.00  |
| 60 | 8 | 0.00  | 0.00  | 0.00  | 0.00  | 0.00  | 0.00  | -0.01 | -0.03 | -0.01 |
| 61 | 8 | 0.00  | 0.00  | 0.00  | 0.00  | 0.00  | 0.00  | 0.00  | 0.00  | 0.00  |
| 62 | 6 | 0.00  | 0.04  | 0.14  | 0.00  | 0.00  | 0.00  | -0.13 | 0.09  | 0.74  |
| 63 | 6 | -0.30 | -0.33 | 0.14  | 0.00  | 0.00  | 0.00  | 0.12  | 0.08  | -0.12 |
| 64 | 6 | 0.29  | 0.38  | -0.09 | 0.00  | 0.00  | 0.00  | -0.11 | -0.13 | 0.05  |

|    |   |       |       |       |      |      |      |       |       |       |
|----|---|-------|-------|-------|------|------|------|-------|-------|-------|
| 65 | 8 | 0.01  | -0.01 | -0.10 | 0.00 | 0.00 | 0.00 | 0.09  | -0.03 | -0.49 |
| 66 | 1 | -0.09 | -0.43 | -0.17 | 0.00 | 0.00 | 0.00 | 0.01  | 0.20  | 0.07  |
| 67 | 6 | -0.03 | -0.06 | -0.01 | 0.00 | 0.00 | 0.00 | 0.02  | 0.02  | 0.00  |
| 68 | 1 | 0.12  | 0.23  | 0.03  | 0.00 | 0.00 | 0.00 | -0.03 | -0.08 | -0.02 |
| 69 | 1 | -0.04 | -0.20 | 0.09  | 0.00 | 0.00 | 0.00 | 0.01  | 0.09  | 0.01  |
| 70 | 1 | -0.19 | -0.11 | -0.04 | 0.00 | 0.00 | 0.00 | 0.04  | 0.05  | 0.03  |
| 71 | 6 | 0.03  | 0.02  | -0.03 | 0.00 | 0.00 | 0.00 | -0.02 | -0.01 | 0.01  |
| 72 | 1 | 0.09  | -0.02 | -0.25 | 0.00 | 0.00 | 0.00 | -0.02 | -0.02 | 0.08  |
| 73 | 1 | 0.08  | 0.09  | -0.03 | 0.00 | 0.00 | 0.00 | -0.04 | -0.01 | 0.01  |
| 74 | 1 | -0.07 | -0.02 | 0.14  | 0.00 | 0.00 | 0.00 | 0.04  | 0.00  | -0.01 |

|                |           |           |           |
|----------------|-----------|-----------|-----------|
| Frequencies -- | 2999.7383 | 3016.7818 | 3023.1661 |
| Red. masses -- | 1.0807    | 1.0398    | 1.0489    |
| Frc consts --  | 5.7297    | 5.5758    | 5.6483    |
| IR Inten --    | 1.0004    | 23.9892   | 14.1323   |
| Raman Activ -- | 31.9507   | 318.0136  | 120.9272  |
| Depolar (P) -- | 0.1624    | 0.1224    | 0.0217    |
| Depolar (U) -- | 0.2794    | 0.2180    | 0.0424    |

[illegible]

|    |   |      |      |      |       |       |       |       |       |       |
|----|---|------|------|------|-------|-------|-------|-------|-------|-------|
| 33 | 1 | 0.00 | 0.00 | 0.00 | 0.00  | 0.00  | 0.00  | 0.00  | 0.00  | 0.00  |
| 34 | 6 | 0.00 | 0.00 | 0.00 | 0.00  | 0.00  | 0.00  | 0.00  | 0.00  | 0.00  |
| 35 | 1 | 0.00 | 0.00 | 0.00 | 0.00  | 0.00  | 0.00  | 0.00  | 0.00  | 0.00  |
| 36 | 6 | 0.00 | 0.00 | 0.00 | 0.00  | 0.00  | 0.00  | 0.00  | 0.00  | 0.00  |
| 37 | 1 | 0.00 | 0.00 | 0.00 | 0.00  | 0.00  | 0.00  | 0.00  | 0.00  | 0.00  |
| 38 | 1 | 0.00 | 0.00 | 0.00 | 0.00  | 0.00  | 0.00  | 0.00  | 0.00  | 0.00  |
| 39 | 1 | 0.01 | 0.00 | 0.00 | 0.00  | 0.00  | 0.00  | 0.00  | 0.00  | 0.00  |
| 40 | 6 | 0.00 | 0.00 | 0.00 | 0.00  | 0.00  | 0.00  | 0.00  | 0.00  | 0.00  |
| 41 | 1 | 0.00 | 0.00 | 0.00 | 0.00  | 0.00  | 0.00  | 0.00  | 0.00  | 0.00  |
| 42 | 6 | 0.00 | 0.00 | 0.00 | 0.00  | 0.00  | 0.00  | 0.00  | 0.00  | 0.00  |
| 43 | 1 | 0.00 | 0.00 | 0.00 | 0.00  | 0.00  | 0.00  | 0.00  | 0.00  | 0.00  |
| 44 | 1 | 0.00 | 0.00 | 0.00 | 0.00  | 0.00  | 0.00  | 0.00  | 0.00  | 0.00  |
| 45 | 1 | 0.00 | 0.00 | 0.00 | 0.00  | 0.00  | 0.00  | 0.00  | 0.00  | 0.00  |
| 46 | 6 | 0.00 | 0.00 | 0.00 | 0.00  | 0.00  | 0.00  | 0.00  | 0.00  | 0.00  |
| 47 | 1 | 0.00 | 0.00 | 0.00 | 0.00  | 0.00  | 0.00  | 0.00  | 0.00  | 0.00  |
| 48 | 6 | 0.00 | 0.00 | 0.00 | 0.00  | 0.00  | 0.00  | 0.00  | 0.00  | 0.00  |
| 49 | 1 | 0.00 | 0.00 | 0.00 | 0.00  | 0.00  | 0.00  | -0.01 | 0.00  | 0.01  |
| 50 | 1 | 0.00 | 0.00 | 0.00 | 0.00  | 0.00  | 0.00  | 0.00  | 0.02  | -0.02 |
| 51 | 6 | 0.00 | 0.00 | 0.00 | 0.00  | 0.00  | 0.00  | 0.00  | 0.00  | 0.00  |
| 52 | 1 | 0.00 | 0.00 | 0.00 | 0.00  | 0.00  | 0.00  | 0.00  | 0.00  | 0.00  |
| 53 | 6 | 0.00 | 0.00 | 0.00 | 0.00  | 0.00  | 0.00  | 0.00  | 0.00  | 0.00  |
| 54 | 1 | 0.00 | 0.00 | 0.00 | 0.00  | 0.00  | 0.00  | 0.00  | 0.00  | 0.00  |
| 55 | 6 | 0.00 | 0.00 | 0.00 | 0.00  | 0.00  | 0.00  | 0.00  | 0.00  | 0.00  |
| 56 | 1 | 0.00 | 0.00 | 0.00 | 0.00  | 0.00  | 0.00  | 0.00  | 0.00  | 0.00  |
| 57 | 6 | 0.00 | 0.00 | 0.00 | 0.00  | 0.00  | 0.00  | 0.00  | 0.00  | 0.00  |
| 58 | 1 | 0.00 | 0.00 | 0.00 | 0.00  | 0.00  | 0.00  | 0.00  | 0.00  | 0.00  |
| 59 | 8 | 0.00 | 0.00 | 0.00 | 0.00  | 0.00  | 0.00  | 0.00  | 0.00  | 0.00  |
| 60 | 8 | 0.00 | 0.00 | 0.00 | 0.00  | 0.00  | 0.00  | 0.00  | 0.00  | 0.00  |
| 61 | 8 | 0.00 | 0.00 | 0.00 | 0.00  | 0.00  | 0.00  | 0.00  | 0.00  | 0.00  |
| 62 | 6 | 0.00 | 0.00 | 0.00 | 0.00  | 0.00  | 0.00  | 0.00  | 0.00  | 0.00  |
| 63 | 6 | 0.00 | 0.00 | 0.00 | 0.00  | 0.00  | 0.00  | 0.00  | 0.00  | 0.00  |
| 64 | 6 | 0.00 | 0.00 | 0.00 | 0.00  | 0.00  | 0.00  | 0.00  | 0.00  | 0.00  |
| 65 | 8 | 0.00 | 0.00 | 0.00 | 0.00  | 0.00  | 0.00  | 0.00  | 0.00  | 0.00  |
| 66 | 1 | 0.00 | 0.00 | 0.00 | -0.01 | 0.00  | 0.01  | -0.01 | 0.00  | 0.01  |
| 67 | 6 | 0.00 | 0.00 | 0.00 | -0.03 | -0.05 | 0.00  | 0.00  | 0.00  | 0.00  |
| 68 | 1 | 0.00 | 0.00 | 0.00 | -0.21 | 0.06  | 0.27  | 0.00  | 0.00  | 0.00  |
| 69 | 1 | 0.00 | 0.00 | 0.00 | 0.63  | 0.03  | 0.21  | 0.04  | 0.00  | 0.02  |
| 70 | 1 | 0.00 | 0.00 | 0.00 | -0.09 | 0.46  | -0.46 | -0.01 | 0.03  | -0.03 |
| 71 | 6 | 0.00 | 0.00 | 0.00 | 0.00  | 0.00  | 0.00  | 0.00  | 0.00  | -0.06 |
| 72 | 1 | 0.00 | 0.00 | 0.00 | 0.02  | 0.01  | 0.00  | -0.23 | -0.17 | -0.04 |
| 73 | 1 | 0.00 | 0.00 | 0.00 | -0.02 | 0.01  | -0.04 | 0.39  | -0.16 | 0.77  |
| 74 | 1 | 0.00 | 0.00 | 0.00 | 0.01  | -0.03 | 0.00  | -0.12 | 0.33  | -0.01 |

184

185

186

A

A

A

|                |           |           |           |
|----------------|-----------|-----------|-----------|
| Frequencies -- | 3032.1905 | 3033.3049 | 3035.3665 |
| Red. masses -- | 1.0616    | 1.0579    | 1.0588    |
| Frc consts --  | 5.7507    | 5.7350    | 5.7474    |
| IR Inten --    | 21.6472   | 21.6519   | 24.2266   |
| Raman Activ -- | 70.9760   | 28.2699   | 74.5468   |
| Depolar (P) -- | 0.1101    | 0.1531    | 0.0816    |
| Depolar (U) -- | 0.1984    | 0.2656    | 0.1509    |
| Atom AN        | X Y Z     | X Y Z     | X Y Z     |

|    |   |       |       |       |       |       |       |       |       |       |
|----|---|-------|-------|-------|-------|-------|-------|-------|-------|-------|
| 1  | 6 | 0.00  | 0.00  | 0.00  | 0.00  | 0.00  | 0.00  | 0.00  | 0.00  | 0.00  |
| 2  | 6 | 0.00  | 0.00  | 0.00  | 0.00  | 0.00  | 0.00  | 0.00  | 0.00  | 0.00  |
| 3  | 6 | 0.00  | 0.00  | 0.00  | 0.00  | 0.00  | 0.00  | 0.00  | 0.00  | 0.00  |
| 4  | 6 | 0.00  | 0.00  | 0.00  | 0.00  | 0.00  | 0.00  | 0.00  | 0.00  | 0.00  |
| 5  | 6 | 0.00  | 0.00  | 0.00  | 0.00  | 0.00  | 0.00  | 0.00  | 0.00  | 0.00  |
| 6  | 6 | 0.00  | 0.00  | 0.00  | 0.00  | 0.00  | 0.00  | 0.00  | 0.00  | 0.00  |
| 7  | 8 | 0.00  | 0.00  | 0.00  | 0.00  | 0.00  | 0.00  | 0.00  | 0.00  | 0.00  |
| 8  | 6 | 0.00  | 0.00  | 0.00  | 0.00  | 0.00  | 0.00  | 0.00  | 0.00  | 0.00  |
| 9  | 6 | 0.00  | 0.00  | 0.00  | 0.00  | 0.00  | 0.00  | 0.00  | 0.00  | 0.00  |
| 10 | 1 | 0.00  | 0.00  | 0.01  | 0.02  | 0.00  | 0.03  | 0.01  | 0.00  | 0.01  |
| 11 | 8 | 0.00  | 0.00  | 0.00  | 0.00  | 0.00  | 0.00  | 0.00  | 0.00  | 0.00  |
| 12 | 6 | 0.00  | 0.00  | 0.00  | 0.00  | 0.00  | 0.00  | 0.00  | 0.00  | 0.00  |
| 13 | 1 | 0.00  | 0.00  | 0.00  | 0.00  | -0.01 | 0.00  | 0.00  | 0.00  | 0.00  |
| 14 | 6 | 0.00  | 0.00  | 0.00  | 0.00  | 0.00  | 0.00  | 0.00  | 0.00  | 0.00  |
| 15 | 8 | 0.00  | 0.00  | 0.00  | 0.00  | 0.00  | 0.00  | 0.00  | 0.00  | 0.00  |
| 16 | 6 | 0.00  | 0.00  | 0.00  | -0.02 | -0.01 | 0.00  | 0.00  | 0.00  | 0.00  |
| 17 | 1 | 0.00  | 0.00  | 0.00  | 0.23  | 0.06  | -0.16 | -0.02 | -0.01 | 0.02  |
| 18 | 1 | 0.00  | 0.00  | 0.00  | 0.00  | 0.12  | 0.16  | 0.00  | -0.01 | -0.02 |
| 19 | 1 | 0.00  | 0.00  | 0.00  | 0.00  | -0.11 | 0.04  | 0.00  | 0.01  | 0.00  |
| 20 | 6 | 0.00  | 0.00  | 0.00  | 0.00  | 0.00  | 0.00  | 0.00  | 0.00  | 0.00  |
| 21 | 1 | 0.00  | 0.00  | 0.00  | 0.04  | -0.01 | 0.05  | 0.00  | 0.00  | 0.00  |
| 22 | 6 | 0.00  | 0.00  | 0.00  | 0.00  | 0.00  | 0.00  | 0.00  | 0.00  | 0.00  |
| 23 | 1 | 0.00  | 0.00  | 0.00  | -0.02 | 0.01  | 0.01  | 0.00  | 0.00  | 0.00  |
| 24 | 1 | 0.00  | 0.00  | 0.00  | 0.00  | -0.01 | -0.01 | 0.00  | 0.00  | 0.00  |
| 25 | 1 | 0.00  | 0.00  | 0.00  | 0.01  | 0.01  | 0.00  | 0.00  | 0.00  | 0.00  |
| 26 | 6 | 0.00  | 0.00  | 0.00  | 0.00  | 0.00  | 0.00  | 0.05  | 0.04  | 0.00  |
| 27 | 1 | 0.01  | 0.01  | 0.02  | -0.01 | 0.00  | -0.01 | -0.31 | -0.26 | -0.55 |
| 28 | 1 | 0.01  | 0.01  | -0.02 | 0.00  | 0.00  | 0.01  | -0.29 | -0.26 | 0.59  |
| 29 | 6 | 0.00  | 0.00  | 0.00  | -0.01 | 0.03  | -0.06 | 0.00  | 0.00  | 0.00  |
| 30 | 1 | 0.02  | -0.01 | 0.03  | 0.47  | -0.17 | 0.65  | 0.00  | 0.00  | 0.00  |
| 31 | 1 | -0.02 | -0.01 | 0.00  | -0.40 | -0.17 | 0.02  | 0.00  | 0.00  | 0.00  |
| 32 | 6 | 0.00  | 0.00  | 0.00  | 0.00  | 0.00  | 0.00  | 0.00  | 0.00  | 0.00  |
| 33 | 1 | 0.00  | 0.00  | 0.00  | 0.01  | 0.00  | -0.01 | 0.00  | 0.00  | 0.00  |
| 34 | 6 | 0.00  | 0.00  | 0.00  | 0.00  | 0.00  | 0.00  | 0.00  | 0.00  | 0.00  |
| 35 | 1 | 0.00  | 0.00  | 0.00  | 0.00  | 0.00  | 0.00  | 0.00  | 0.00  | 0.00  |
| 36 | 6 | 0.00  | 0.00  | 0.00  | 0.00  | 0.00  | 0.00  | 0.00  | 0.00  | 0.00  |
| 37 | 1 | 0.00  | 0.00  | 0.00  | 0.00  | 0.00  | 0.00  | 0.00  | 0.00  | 0.00  |
| 38 | 1 | 0.00  | 0.00  | 0.00  | 0.00  | 0.00  | 0.00  | 0.00  | 0.00  | 0.00  |
| 39 | 1 | 0.00  | 0.00  | 0.00  | -0.01 | 0.00  | 0.00  | 0.00  | 0.00  | 0.00  |
| 40 | 6 | 0.00  | 0.00  | 0.00  | 0.00  | 0.00  | 0.00  | 0.00  | 0.00  | 0.00  |
| 41 | 1 | 0.00  | 0.00  | 0.00  | 0.00  | 0.00  | 0.00  | 0.00  | 0.02  | 0.02  |
| 42 | 6 | 0.00  | 0.00  | 0.00  | 0.00  | 0.00  | 0.00  | 0.00  | 0.00  | -0.01 |
| 43 | 1 | 0.03  | 0.02  | 0.03  | 0.00  | 0.00  | 0.00  | 0.06  | 0.04  | 0.06  |
| 44 | 1 | 0.00  | -0.06 | 0.00  | 0.00  | 0.00  | 0.00  | 0.00  | -0.04 | 0.00  |
| 45 | 1 | -0.02 | 0.01  | 0.01  | 0.00  | 0.00  | 0.00  | -0.04 | 0.01  | 0.01  |
| 46 | 6 | 0.00  | 0.00  | 0.00  | 0.00  | 0.00  | 0.00  | 0.00  | 0.00  | 0.00  |
| 47 | 1 | -0.02 | -0.04 | -0.02 | 0.00  | 0.00  | 0.00  | 0.00  | 0.00  | 0.00  |
| 48 | 6 | 0.02  | -0.06 | 0.02  | 0.00  | 0.00  | 0.00  | 0.00  | 0.00  | 0.00  |
| 49 | 1 | -0.34 | 0.10  | 0.31  | 0.01  | 0.00  | -0.01 | -0.01 | 0.00  | 0.01  |
| 50 | 1 | 0.10  | 0.63  | -0.58 | 0.00  | -0.02 | 0.02  | 0.00  | 0.02  | -0.02 |
| 51 | 6 | 0.00  | 0.00  | 0.00  | 0.00  | 0.00  | 0.00  | 0.00  | 0.00  | 0.00  |
| 52 | 1 | -0.03 | -0.06 | 0.07  | 0.00  | 0.00  | 0.00  | 0.01  | 0.03  | -0.03 |

|    |   |       |       |       |      |      |      |      |      |      |
|----|---|-------|-------|-------|------|------|------|------|------|------|
| 53 | 6 | 0.00  | 0.00  | 0.00  | 0.00 | 0.00 | 0.00 | 0.00 | 0.00 | 0.00 |
| 54 | 1 | 0.00  | 0.00  | 0.00  | 0.00 | 0.00 | 0.00 | 0.00 | 0.01 | 0.00 |
| 55 | 6 | 0.00  | 0.00  | 0.00  | 0.00 | 0.00 | 0.00 | 0.00 | 0.00 | 0.00 |
| 56 | 1 | 0.00  | 0.00  | 0.00  | 0.00 | 0.00 | 0.00 | 0.00 | 0.00 | 0.00 |
| 57 | 6 | 0.00  | 0.00  | 0.00  | 0.00 | 0.00 | 0.00 | 0.00 | 0.00 | 0.00 |
| 58 | 1 | 0.00  | -0.01 | 0.00  | 0.00 | 0.00 | 0.00 | 0.00 | 0.00 | 0.00 |
| 59 | 8 | 0.00  | 0.00  | 0.00  | 0.00 | 0.00 | 0.00 | 0.00 | 0.00 | 0.00 |
| 60 | 8 | 0.00  | 0.00  | 0.00  | 0.00 | 0.00 | 0.00 | 0.00 | 0.00 | 0.00 |
| 61 | 8 | 0.00  | 0.00  | 0.00  | 0.00 | 0.00 | 0.00 | 0.00 | 0.00 | 0.00 |
| 62 | 6 | 0.00  | 0.00  | 0.00  | 0.00 | 0.00 | 0.00 | 0.00 | 0.00 | 0.00 |
| 63 | 6 | 0.00  | 0.00  | 0.00  | 0.00 | 0.00 | 0.00 | 0.00 | 0.00 | 0.00 |
| 64 | 6 | 0.00  | 0.00  | 0.00  | 0.00 | 0.00 | 0.00 | 0.00 | 0.00 | 0.00 |
| 65 | 8 | 0.00  | 0.00  | 0.00  | 0.00 | 0.00 | 0.00 | 0.00 | 0.00 | 0.00 |
| 66 | 1 | 0.00  | 0.00  | 0.00  | 0.00 | 0.00 | 0.00 | 0.00 | 0.00 | 0.00 |
| 67 | 6 | 0.00  | 0.00  | 0.00  | 0.00 | 0.00 | 0.00 | 0.00 | 0.00 | 0.00 |
| 68 | 1 | 0.00  | 0.00  | 0.00  | 0.00 | 0.00 | 0.00 | 0.00 | 0.00 | 0.00 |
| 69 | 1 | 0.00  | 0.00  | 0.00  | 0.00 | 0.00 | 0.00 | 0.00 | 0.00 | 0.00 |
| 70 | 1 | 0.00  | 0.00  | 0.00  | 0.00 | 0.00 | 0.00 | 0.00 | 0.00 | 0.00 |
| 71 | 6 | 0.00  | 0.00  | 0.00  | 0.00 | 0.00 | 0.00 | 0.00 | 0.00 | 0.00 |
| 72 | 1 | 0.01  | 0.01  | 0.00  | 0.00 | 0.00 | 0.00 | 0.00 | 0.00 | 0.00 |
| 73 | 1 | -0.01 | 0.00  | -0.02 | 0.00 | 0.00 | 0.01 | 0.00 | 0.00 | 0.00 |
| 74 | 1 | 0.00  | -0.01 | 0.00  | 0.00 | 0.00 | 0.00 | 0.00 | 0.00 | 0.00 |

187

188

189

A

A

A

|                |           |           |           |
|----------------|-----------|-----------|-----------|
| Frequencies -- | 3036.5183 | 3039.4302 | 3053.5722 |
| Red. masses -- | 1.0495    | 1.0767    | 1.0407    |
| Frc consts --  | 5.7017    | 5.8605    | 5.7172    |
| IR Inten --    | 27.8067   | 14.9883   | 15.2506   |
| Raman Activ -- | 156.6799  | 44.6010   | 139.3733  |
| Depolar (P) -- | 0.0795    | 0.1290    | 0.0498    |
| Depolar (U) -- | 0.1472    | 0.2286    | 0.0950    |

| Atom | AN | X     | Y     | Z     | X     | Y     | Z     | X    | Y    | Z    |
|------|----|-------|-------|-------|-------|-------|-------|------|------|------|
| 1    | 6  | 0.00  | 0.00  | 0.00  | 0.00  | 0.00  | 0.00  | 0.00 | 0.00 | 0.00 |
| 2    | 6  | 0.00  | 0.00  | 0.00  | 0.00  | 0.00  | 0.00  | 0.00 | 0.00 | 0.00 |
| 3    | 6  | 0.00  | 0.00  | 0.00  | 0.00  | 0.00  | 0.00  | 0.00 | 0.00 | 0.00 |
| 4    | 6  | 0.00  | 0.00  | 0.00  | 0.00  | 0.00  | 0.00  | 0.00 | 0.00 | 0.00 |
| 5    | 6  | 0.00  | 0.00  | 0.00  | 0.00  | 0.00  | 0.00  | 0.00 | 0.00 | 0.00 |
| 6    | 6  | 0.00  | 0.00  | 0.00  | 0.00  | 0.00  | 0.00  | 0.00 | 0.00 | 0.00 |
| 7    | 8  | 0.00  | 0.00  | 0.00  | 0.00  | 0.00  | 0.00  | 0.00 | 0.00 | 0.00 |
| 8    | 6  | 0.00  | 0.00  | 0.00  | 0.00  | 0.00  | 0.00  | 0.00 | 0.00 | 0.00 |
| 9    | 6  | 0.02  | 0.00  | 0.03  | -0.03 | 0.01  | -0.06 | 0.00 | 0.00 | 0.00 |
| 10   | 1  | -0.17 | 0.06  | -0.33 | 0.38  | -0.14 | 0.75  | 0.00 | 0.00 | 0.00 |
| 11   | 8  | 0.00  | 0.00  | 0.00  | 0.00  | 0.00  | 0.00  | 0.00 | 0.00 | 0.00 |
| 12   | 6  | 0.00  | 0.00  | 0.00  | 0.00  | 0.01  | 0.01  | 0.00 | 0.00 | 0.00 |
| 13   | 1  | 0.00  | 0.04  | 0.04  | 0.01  | -0.11 | -0.10 | 0.00 | 0.00 | 0.00 |
| 14   | 6  | 0.00  | 0.00  | 0.00  | 0.00  | 0.00  | 0.00  | 0.00 | 0.00 | 0.00 |
| 15   | 8  | 0.00  | 0.00  | 0.00  | 0.00  | 0.00  | 0.00  | 0.00 | 0.00 | 0.00 |
| 16   | 6  | -0.04 | -0.01 | -0.01 | -0.02 | 0.00  | 0.00  | 0.00 | 0.00 | 0.00 |
| 17   | 1  | 0.52  | 0.12  | -0.35 | 0.24  | 0.06  | -0.16 | 0.00 | 0.00 | 0.00 |
| 18   | 1  | -0.01 | 0.29  | 0.40  | 0.00  | 0.10  | 0.14  | 0.00 | 0.00 | 0.00 |
| 19   | 1  | 0.00  | -0.28 | 0.09  | 0.00  | -0.12 | 0.04  | 0.00 | 0.00 | 0.00 |
| 20   | 6  | 0.01  | 0.00  | 0.01  | -0.01 | 0.00  | -0.01 | 0.00 | 0.00 | 0.00 |

|    |   |       |       |       |       |       |       |       |       |       |
|----|---|-------|-------|-------|-------|-------|-------|-------|-------|-------|
| 21 | 1 | -0.08 | 0.03  | -0.09 | 0.10  | -0.04 | 0.12  | 0.00  | 0.00  | 0.00  |
| 22 | 6 | 0.00  | 0.00  | 0.00  | 0.00  | 0.00  | 0.01  | 0.00  | 0.00  | 0.00  |
| 23 | 1 | -0.04 | 0.02  | 0.01  | -0.06 | 0.03  | 0.02  | 0.00  | 0.00  | 0.00  |
| 24 | 1 | 0.00  | -0.01 | -0.01 | -0.02 | -0.06 | -0.07 | 0.00  | 0.00  | 0.00  |
| 25 | 1 | 0.01  | 0.01  | -0.01 | 0.03  | 0.04  | -0.01 | 0.00  | 0.00  | 0.00  |
| 26 | 6 | 0.00  | 0.00  | 0.00  | 0.00  | 0.00  | 0.00  | 0.00  | 0.00  | 0.01  |
| 27 | 1 | -0.01 | -0.01 | -0.02 | 0.00  | 0.00  | 0.00  | 0.01  | 0.01  | 0.02  |
| 28 | 1 | -0.01 | -0.01 | 0.02  | 0.00  | 0.00  | 0.00  | 0.04  | 0.04  | -0.09 |
| 29 | 6 | 0.00  | -0.01 | 0.02  | 0.00  | -0.01 | 0.01  | 0.00  | 0.00  | 0.00  |
| 30 | 1 | -0.16 | 0.06  | -0.23 | -0.11 | 0.04  | -0.15 | 0.00  | 0.00  | 0.00  |
| 31 | 1 | 0.11  | 0.05  | -0.01 | 0.04  | 0.02  | 0.00  | 0.00  | 0.00  | 0.00  |
| 32 | 6 | 0.00  | 0.00  | 0.00  | 0.00  | 0.00  | 0.00  | 0.00  | 0.00  | 0.00  |
| 33 | 1 | -0.01 | 0.00  | 0.01  | -0.01 | 0.00  | 0.01  | 0.00  | 0.00  | 0.00  |
| 34 | 6 | 0.00  | 0.00  | 0.00  | 0.00  | 0.00  | 0.00  | 0.00  | 0.00  | 0.00  |
| 35 | 1 | 0.00  | 0.00  | 0.00  | 0.00  | 0.00  | 0.00  | 0.00  | 0.00  | 0.00  |
| 36 | 6 | 0.00  | 0.00  | 0.00  | 0.01  | 0.00  | 0.00  | 0.00  | 0.00  | 0.00  |
| 37 | 1 | -0.01 | 0.02  | 0.01  | 0.02  | -0.04 | -0.03 | 0.00  | 0.00  | 0.00  |
| 38 | 1 | -0.01 | -0.01 | 0.01  | 0.02  | 0.03  | -0.02 | 0.00  | 0.00  | 0.00  |
| 39 | 1 | 0.06  | -0.01 | 0.00  | -0.13 | 0.02  | -0.01 | 0.00  | 0.00  | 0.00  |
| 40 | 6 | 0.00  | 0.00  | 0.00  | 0.00  | 0.00  | 0.00  | 0.00  | 0.00  | 0.00  |
| 41 | 1 | 0.00  | 0.00  | 0.00  | 0.00  | 0.00  | 0.00  | 0.00  | 0.00  | 0.00  |
| 42 | 6 | 0.00  | 0.00  | 0.00  | 0.00  | 0.00  | 0.00  | -0.01 | 0.01  | -0.05 |
| 43 | 1 | 0.00  | 0.00  | 0.00  | 0.00  | 0.00  | 0.00  | 0.49  | 0.30  | 0.50  |
| 44 | 1 | 0.00  | -0.01 | 0.00  | 0.00  | 0.00  | 0.00  | 0.03  | -0.49 | 0.01  |
| 45 | 1 | 0.00  | 0.00  | 0.00  | 0.00  | 0.00  | 0.00  | -0.36 | 0.10  | 0.09  |
| 46 | 6 | 0.00  | 0.00  | 0.00  | 0.00  | 0.00  | 0.00  | 0.00  | 0.00  | 0.00  |
| 47 | 1 | 0.00  | 0.00  | 0.00  | 0.00  | 0.00  | 0.00  | 0.00  | 0.01  | 0.00  |
| 48 | 6 | 0.00  | 0.00  | 0.00  | 0.00  | 0.00  | 0.00  | 0.00  | 0.00  | 0.00  |
| 49 | 1 | 0.00  | 0.00  | 0.00  | 0.00  | 0.00  | 0.00  | 0.05  | -0.02 | -0.04 |
| 50 | 1 | 0.00  | 0.01  | -0.01 | 0.00  | 0.00  | 0.00  | -0.01 | -0.04 | 0.03  |
| 51 | 6 | 0.00  | 0.00  | 0.00  | 0.00  | 0.00  | 0.00  | 0.00  | 0.00  | 0.00  |
| 52 | 1 | 0.00  | 0.00  | 0.00  | 0.00  | 0.00  | 0.00  | -0.01 | -0.03 | 0.03  |
| 53 | 6 | 0.00  | 0.00  | 0.00  | 0.00  | 0.00  | 0.00  | 0.00  | 0.00  | 0.00  |
| 54 | 1 | 0.00  | 0.00  | 0.00  | 0.00  | 0.00  | 0.00  | 0.00  | 0.00  | 0.00  |
| 55 | 6 | 0.00  | 0.00  | 0.00  | 0.00  | 0.00  | 0.00  | 0.00  | 0.00  | 0.00  |
| 56 | 1 | 0.00  | 0.00  | 0.00  | 0.00  | 0.00  | 0.00  | 0.00  | 0.00  | 0.00  |
| 57 | 6 | 0.00  | 0.00  | 0.00  | 0.00  | 0.00  | 0.00  | 0.00  | 0.00  | 0.00  |
| 58 | 1 | 0.00  | 0.00  | 0.00  | 0.00  | 0.00  | 0.00  | 0.00  | 0.00  | 0.00  |
| 59 | 8 | 0.00  | 0.00  | 0.00  | 0.00  | 0.00  | 0.00  | 0.00  | 0.00  | 0.00  |
| 60 | 8 | 0.00  | 0.00  | 0.00  | 0.00  | 0.00  | 0.00  | 0.00  | 0.00  | 0.00  |
| 61 | 8 | 0.00  | 0.00  | 0.00  | 0.00  | 0.00  | 0.00  | 0.00  | 0.00  | 0.00  |
| 62 | 6 | 0.00  | 0.00  | 0.00  | 0.00  | 0.00  | 0.00  | 0.00  | 0.00  | 0.00  |
| 63 | 6 | 0.00  | 0.00  | 0.00  | 0.00  | 0.00  | 0.00  | 0.00  | 0.00  | 0.00  |
| 64 | 6 | 0.00  | 0.00  | 0.00  | 0.00  | 0.00  | 0.00  | 0.00  | 0.00  | 0.00  |
| 65 | 8 | 0.00  | 0.00  | 0.00  | 0.00  | 0.00  | 0.00  | 0.00  | 0.00  | 0.00  |
| 66 | 1 | 0.00  | 0.00  | 0.00  | 0.00  | 0.00  | 0.00  | 0.00  | 0.00  | 0.00  |
| 67 | 6 | 0.00  | 0.00  | 0.00  | 0.00  | 0.00  | 0.00  | 0.00  | 0.00  | 0.00  |
| 68 | 1 | 0.00  | 0.00  | 0.00  | 0.00  | 0.00  | 0.00  | 0.00  | 0.00  | 0.00  |
| 69 | 1 | 0.00  | 0.00  | 0.00  | 0.00  | 0.00  | 0.00  | -0.01 | 0.00  | 0.00  |
| 70 | 1 | 0.00  | 0.00  | 0.00  | 0.00  | 0.00  | 0.00  | 0.00  | 0.00  | 0.00  |
| 71 | 6 | 0.00  | 0.00  | 0.00  | 0.00  | 0.00  | 0.00  | 0.00  | 0.00  | 0.00  |
| 72 | 1 | 0.00  | 0.00  | 0.00  | 0.01  | 0.01  | 0.00  | 0.00  | 0.00  | 0.00  |

|                |    |           |      |      |       |           |       |       |       |           |  |
|----------------|----|-----------|------|------|-------|-----------|-------|-------|-------|-----------|--|
| 73             | 1  | 0.00      | 0.00 | 0.01 | -0.01 | 0.00      | -0.02 | 0.00  | 0.00  | 0.00      |  |
| 74             | 1  | 0.00      | 0.00 | 0.00 | 0.01  | -0.02     | 0.00  | 0.00  | 0.00  | 0.00      |  |
|                |    |           |      | 190  | 191   |           |       | 192   |       |           |  |
|                |    |           |      | A    | A     |           |       | A     |       |           |  |
| Frequencies -- |    | 3055.6408 |      |      |       | 3056.0169 |       |       |       | 3064.5278 |  |
| Red. masses -- |    | 1.0982    |      |      |       | 1.0362    |       |       |       | 1.0494    |  |
| Frc consts --  |    | 6.0414    |      |      |       | 5.7018    |       |       |       | 5.8064    |  |
| IR Inten --    |    | 14.4803   |      |      |       | 13.0488   |       |       |       | 17.1901   |  |
| Raman Activ -- |    | 142.8654  |      |      |       | 74.2148   |       |       |       | 74.8965   |  |
| Depolar (P) -- |    | 0.7266    |      |      |       | 0.0213    |       |       |       | 0.0538    |  |
| Depolar (U) -- |    | 0.8417    |      |      |       | 0.0417    |       |       |       | 0.1021    |  |
| Atom           | AN | X         | Y    | Z    | X     | Y         | Z     | X     | Y     | Z         |  |
| 1              | 6  | 0.00      | 0.00 | 0.00 | 0.00  | 0.00      | 0.00  | 0.00  | 0.00  | 0.00      |  |
| 2              | 6  | 0.00      | 0.00 | 0.00 | 0.00  | 0.00      | 0.00  | 0.00  | 0.00  | 0.00      |  |
| 3              | 6  | 0.00      | 0.00 | 0.00 | 0.00  | 0.00      | 0.00  | 0.00  | 0.00  | 0.00      |  |
| 4              | 6  | 0.00      | 0.00 | 0.00 | 0.00  | 0.00      | 0.00  | 0.00  | 0.00  | 0.00      |  |
| 5              | 6  | 0.00      | 0.00 | 0.00 | 0.00  | 0.00      | 0.00  | 0.00  | 0.00  | 0.00      |  |
| 6              | 6  | 0.00      | 0.00 | 0.00 | 0.00  | 0.00      | 0.00  | 0.00  | 0.00  | 0.00      |  |
| 7              | 8  | 0.00      | 0.00 | 0.00 | 0.00  | 0.00      | 0.00  | 0.00  | 0.00  | 0.00      |  |
| 8              | 6  | 0.00      | 0.00 | 0.00 | 0.00  | 0.00      | 0.00  | 0.00  | 0.00  | 0.00      |  |
| 9              | 6  | 0.00      | 0.00 | 0.00 | 0.00  | 0.00      | 0.00  | 0.00  | 0.00  | 0.00      |  |
| 10             | 1  | 0.00      | 0.00 | 0.00 | 0.02  | -0.01     | 0.05  | 0.03  | -0.01 | 0.06      |  |
| 11             | 8  | 0.00      | 0.00 | 0.00 | 0.00  | 0.00      | 0.00  | 0.00  | 0.00  | 0.00      |  |
| 12             | 6  | 0.00      | 0.00 | 0.00 | 0.00  | 0.00      | 0.00  | 0.00  | 0.03  | 0.03      |  |
| 13             | 1  | 0.00      | 0.00 | 0.00 | 0.00  | 0.02      | 0.02  | 0.03  | -0.32 | -0.31     |  |
| 14             | 6  | 0.00      | 0.00 | 0.00 | 0.00  | 0.00      | 0.00  | 0.00  | 0.00  | 0.00      |  |
| 15             | 8  | 0.00      | 0.00 | 0.00 | 0.00  | 0.00      | 0.00  | 0.00  | 0.00  | 0.00      |  |
| 16             | 6  | 0.00      | 0.00 | 0.00 | -0.01 | -0.01     | 0.00  | 0.00  | 0.00  | 0.00      |  |
| 17             | 1  | 0.00      | 0.00 | 0.00 | 0.08  | 0.02      | -0.05 | 0.02  | 0.01  | -0.02     |  |
| 18             | 1  | 0.00      | 0.00 | 0.00 | 0.00  | 0.02      | 0.03  | 0.00  | 0.00  | 0.00      |  |
| 19             | 1  | 0.00      | 0.00 | 0.00 | 0.00  | 0.02      | -0.01 | 0.00  | 0.01  | 0.00      |  |
| 20             | 6  | 0.00      | 0.00 | 0.00 | 0.00  | 0.00      | 0.00  | 0.00  | 0.00  | 0.00      |  |
| 21             | 1  | 0.00      | 0.00 | 0.00 | 0.00  | 0.00      | 0.00  | 0.01  | 0.00  | 0.01      |  |
| 22             | 6  | 0.00      | 0.00 | 0.00 | -0.03 | 0.01      | -0.04 | -0.01 | 0.01  | -0.01     |  |
| 23             | 1  | 0.00      | 0.00 | 0.00 | 0.48  | -0.21     | -0.20 | 0.14  | -0.06 | -0.06     |  |
| 24             | 1  | 0.00      | 0.00 | 0.00 | 0.12  | 0.40      | 0.47  | 0.02  | 0.09  | 0.10      |  |
| 25             | 1  | 0.00      | 0.00 | 0.00 | -0.25 | -0.34     | 0.15  | -0.07 | -0.09 | 0.04      |  |
| 26             | 6  | 0.00      | 0.00 | 0.00 | 0.00  | 0.00      | 0.00  | 0.00  | 0.00  | 0.00      |  |
| 27             | 1  | 0.00      | 0.00 | 0.00 | 0.00  | 0.00      | 0.00  | 0.00  | 0.00  | 0.00      |  |
| 28             | 1  | 0.00      | 0.00 | 0.00 | 0.00  | 0.00      | 0.00  | -0.01 | 0.00  | 0.01      |  |
| 29             | 6  | 0.00      | 0.00 | 0.00 | 0.00  | 0.00      | 0.00  | 0.00  | 0.00  | 0.00      |  |
| 30             | 1  | 0.00      | 0.00 | 0.00 | -0.01 | 0.00      | -0.01 | 0.00  | 0.00  | 0.00      |  |
| 31             | 1  | 0.00      | 0.00 | 0.00 | -0.01 | 0.00      | 0.00  | -0.01 | 0.00  | 0.00      |  |
| 32             | 6  | 0.00      | 0.00 | 0.00 | 0.00  | 0.00      | 0.00  | 0.00  | 0.00  | 0.00      |  |
| 33             | 1  | 0.00      | 0.00 | 0.00 | 0.00  | 0.00      | 0.00  | 0.00  | 0.00  | 0.00      |  |
| 34             | 6  | 0.00      | 0.00 | 0.00 | 0.00  | 0.00      | 0.00  | 0.00  | 0.00  | 0.00      |  |
| 35             | 1  | 0.00      | 0.00 | 0.00 | 0.00  | 0.00      | 0.00  | 0.00  | 0.00  | 0.00      |  |
| 36             | 6  | 0.00      | 0.00 | 0.00 | 0.01  | 0.00      | 0.01  | -0.01 | -0.02 | -0.04     |  |
| 37             | 1  | 0.00      | 0.00 | 0.00 | 0.05  | -0.14     | -0.09 | -0.20 | 0.54  | 0.33      |  |
| 38             | 1  | 0.00      | 0.00 | 0.00 | 0.04  | 0.07      | -0.03 | -0.14 | -0.24 | 0.11      |  |
| 39             | 1  | 0.00      | 0.00 | 0.00 | -0.19 | 0.02      | -0.01 | 0.44  | -0.06 | 0.03      |  |
| 40             | 6  | 0.00      | 0.00 | 0.00 | 0.00  | 0.00      | 0.00  | 0.00  | 0.00  | 0.00      |  |





|    |   |       |       |       |       |       |       |       |       |       |
|----|---|-------|-------|-------|-------|-------|-------|-------|-------|-------|
| 9  | 6 | 0.00  | 0.00  | 0.00  | -0.01 | 0.00  | -0.02 | 0.00  | 0.00  | 0.00  |
| 10 | 1 | 0.00  | 0.00  | 0.00  | 0.10  | -0.03 | 0.18  | 0.00  | 0.00  | 0.01  |
| 11 | 8 | 0.00  | 0.00  | 0.00  | 0.00  | 0.00  | 0.00  | 0.00  | 0.00  | 0.00  |
| 12 | 6 | 0.00  | 0.00  | 0.00  | 0.01  | -0.05 | -0.05 | 0.00  | 0.00  | 0.00  |
| 13 | 1 | 0.00  | -0.01 | -0.01 | -0.06 | 0.60  | 0.58  | 0.00  | 0.03  | 0.03  |
| 14 | 6 | 0.00  | 0.00  | 0.00  | 0.00  | 0.00  | 0.00  | 0.00  | 0.00  | 0.00  |
| 15 | 8 | 0.00  | 0.00  | 0.00  | 0.00  | 0.00  | 0.00  | 0.00  | 0.00  | 0.00  |
| 16 | 6 | 0.00  | 0.00  | 0.00  | 0.00  | 0.00  | 0.00  | 0.00  | 0.00  | 0.00  |
| 17 | 1 | 0.00  | 0.00  | 0.00  | 0.03  | 0.01  | -0.02 | 0.00  | 0.00  | 0.00  |
| 18 | 1 | 0.00  | 0.00  | 0.00  | 0.00  | -0.01 | -0.01 | 0.00  | 0.00  | 0.00  |
| 19 | 1 | 0.00  | 0.00  | 0.00  | 0.00  | 0.01  | 0.00  | 0.00  | 0.00  | 0.00  |
| 20 | 6 | 0.00  | 0.00  | 0.00  | 0.00  | 0.00  | 0.00  | 0.00  | 0.00  | 0.00  |
| 21 | 1 | 0.00  | 0.00  | 0.00  | 0.01  | 0.00  | 0.01  | 0.00  | 0.00  | 0.00  |
| 22 | 6 | 0.00  | 0.00  | 0.00  | 0.00  | 0.00  | 0.00  | 0.00  | 0.00  | 0.00  |
| 23 | 1 | 0.00  | 0.00  | 0.00  | 0.07  | -0.03 | -0.03 | 0.00  | 0.00  | 0.00  |
| 24 | 1 | 0.00  | 0.00  | 0.00  | 0.00  | 0.02  | 0.02  | 0.00  | 0.00  | 0.00  |
| 25 | 1 | 0.00  | 0.00  | 0.00  | -0.03 | -0.04 | 0.02  | 0.00  | 0.00  | 0.00  |
| 26 | 6 | 0.00  | 0.00  | 0.01  | 0.00  | 0.00  | 0.00  | 0.00  | 0.00  | -0.09 |
| 27 | 1 | -0.05 | -0.04 | -0.09 | -0.02 | -0.01 | -0.03 | 0.32  | 0.27  | 0.54  |
| 28 | 1 | 0.02  | 0.01  | -0.03 | 0.01  | 0.01  | -0.02 | -0.28 | -0.25 | 0.54  |
| 29 | 6 | 0.00  | 0.00  | 0.00  | 0.00  | 0.00  | 0.00  | 0.00  | 0.00  | 0.00  |
| 30 | 1 | 0.00  | 0.00  | 0.00  | -0.01 | 0.00  | -0.01 | 0.00  | 0.00  | 0.00  |
| 31 | 1 | 0.00  | 0.00  | 0.00  | -0.03 | -0.01 | 0.00  | 0.00  | 0.00  | 0.00  |
| 32 | 6 | 0.00  | 0.00  | 0.00  | 0.00  | 0.00  | 0.00  | 0.00  | 0.00  | 0.00  |
| 33 | 1 | 0.00  | 0.00  | 0.00  | 0.00  | 0.00  | 0.00  | 0.00  | 0.00  | 0.00  |
| 34 | 6 | 0.00  | 0.00  | 0.00  | 0.00  | 0.00  | 0.00  | 0.00  | 0.00  | 0.00  |
| 35 | 1 | 0.00  | 0.00  | 0.00  | 0.00  | 0.00  | 0.00  | 0.00  | 0.00  | 0.00  |
| 36 | 6 | 0.00  | 0.00  | 0.00  | -0.01 | -0.01 | -0.02 | 0.00  | 0.00  | 0.00  |
| 37 | 1 | 0.00  | 0.00  | 0.00  | -0.09 | 0.26  | 0.16  | 0.00  | 0.00  | 0.00  |
| 38 | 1 | 0.00  | 0.00  | 0.00  | -0.08 | -0.14 | 0.06  | 0.00  | 0.00  | 0.00  |
| 39 | 1 | 0.00  | 0.00  | 0.00  | 0.24  | -0.03 | 0.02  | 0.01  | 0.00  | 0.00  |
| 40 | 6 | 0.00  | 0.00  | 0.00  | 0.00  | 0.00  | 0.00  | 0.00  | 0.00  | 0.00  |
| 41 | 1 | 0.00  | 0.01  | 0.01  | 0.00  | 0.00  | 0.00  | 0.01  | -0.04 | -0.04 |
| 42 | 6 | 0.00  | 0.00  | 0.00  | 0.00  | 0.00  | 0.00  | 0.00  | 0.00  | 0.00  |
| 43 | 1 | -0.04 | -0.02 | -0.04 | 0.00  | 0.00  | 0.00  | 0.01  | 0.00  | 0.01  |
| 44 | 1 | 0.00  | 0.02  | 0.00  | 0.00  | 0.01  | 0.00  | 0.00  | -0.05 | 0.00  |
| 45 | 1 | 0.02  | -0.01 | -0.01 | 0.01  | 0.00  | 0.00  | -0.02 | 0.01  | 0.01  |
| 46 | 6 | 0.00  | 0.00  | 0.00  | 0.00  | 0.00  | 0.00  | 0.00  | 0.00  | 0.00  |
| 47 | 1 | 0.01  | 0.01  | 0.01  | -0.01 | -0.02 | -0.01 | 0.00  | 0.01  | 0.00  |
| 48 | 6 | -0.03 | 0.00  | 0.04  | 0.00  | 0.00  | 0.00  | -0.02 | 0.00  | 0.02  |
| 49 | 1 | 0.37  | -0.12 | -0.31 | 0.00  | 0.00  | 0.00  | 0.18  | -0.06 | -0.15 |
| 50 | 1 | 0.01  | 0.14  | -0.12 | 0.00  | 0.00  | 0.00  | 0.01  |       |       |

|    |   |      |      |      |       |       |       |      |      |      |
|----|---|------|------|------|-------|-------|-------|------|------|------|
| 61 | 8 | 0.00 | 0.00 | 0.00 | 0.00  | 0.00  | 0.00  | 0.00 | 0.00 | 0.00 |
| 62 | 6 | 0.00 | 0.00 | 0.00 | 0.00  | 0.00  | 0.00  | 0.00 | 0.00 | 0.00 |
| 63 | 6 | 0.00 | 0.00 | 0.00 | 0.00  | 0.00  | 0.00  | 0.00 | 0.00 | 0.00 |
| 64 | 6 | 0.00 | 0.00 | 0.00 | 0.00  | 0.00  | 0.00  | 0.00 | 0.00 | 0.00 |
| 65 | 8 | 0.00 | 0.00 | 0.00 | 0.00  | 0.00  | 0.00  | 0.00 | 0.00 | 0.00 |
| 66 | 1 | 0.00 | 0.00 | 0.00 | 0.00  | 0.00  | 0.00  | 0.00 | 0.00 | 0.00 |
| 67 | 6 | 0.00 | 0.00 | 0.00 | 0.00  | 0.00  | 0.00  | 0.00 | 0.00 | 0.00 |
| 68 | 1 | 0.00 | 0.00 | 0.00 | 0.01  | 0.00  | -0.02 | 0.00 | 0.00 | 0.00 |
| 69 | 1 | 0.00 | 0.00 | 0.00 | 0.01  | 0.00  | 0.01  | 0.00 | 0.00 | 0.00 |
| 70 | 1 | 0.00 | 0.00 | 0.00 | 0.00  | 0.00  | 0.00  | 0.00 | 0.00 | 0.00 |
| 71 | 6 | 0.00 | 0.00 | 0.00 | 0.01  | -0.01 | 0.00  | 0.00 | 0.00 | 0.00 |
| 72 | 1 | 0.00 | 0.00 | 0.00 | -0.06 | -0.05 | -0.01 | 0.00 | 0.00 | 0.00 |
| 73 | 1 | 0.00 | 0.00 | 0.00 | -0.02 | 0.00  | -0.03 | 0.00 | 0.00 | 0.00 |
| 74 | 1 | 0.00 | 0.00 | 0.00 | -0.06 | 0.18  | 0.00  | 0.00 | 0.01 | 0.00 |

196

197

198

A

A

A

|                |           |           |           |
|----------------|-----------|-----------|-----------|
| Frequencies -- | 3081.6251 | 3087.0614 | 3092.7521 |
| Red. masses -- | 1.0972    | 1.0894    | 1.0997    |
| Frc consts --  | 6.1392    | 6.1166    | 6.1977    |
| IR Inten --    | 37.1201   | 18.8484   | 17.7459   |
| Raman Activ -- | 124.1980  | 62.1458   | 47.7211   |
| Depolar (P) -- | 0.3278    | 0.4723    | 0.5241    |
| Depolar (U) -- | 0.4937    | 0.6416    | 0.6878    |

| Atom | AN | X     | Y     | Z     | X     | Y     | Z     | X     | Y     | Z     |
|------|----|-------|-------|-------|-------|-------|-------|-------|-------|-------|
| 1    | 6  | 0.00  | 0.00  | 0.00  | 0.00  | 0.00  | 0.00  | 0.00  | 0.00  | 0.00  |
| 2    | 6  | 0.00  | 0.00  | 0.00  | 0.00  | 0.00  | 0.00  | 0.00  | 0.00  | 0.00  |
| 3    | 6  | 0.00  | 0.00  | 0.00  | 0.00  | 0.00  | 0.00  | 0.00  | 0.00  | 0.00  |
| 4    | 6  | 0.00  | 0.00  | 0.00  | 0.00  | 0.00  | 0.00  | 0.00  | 0.00  | 0.00  |
| 5    | 6  | 0.00  | 0.00  | 0.00  | 0.00  | 0.00  | 0.00  | 0.00  | 0.00  | 0.00  |
| 6    | 6  | 0.00  | 0.00  | 0.00  | 0.00  | 0.00  | 0.00  | 0.00  | 0.00  | 0.00  |
| 7    | 8  | 0.00  | 0.00  | 0.00  | 0.00  | 0.00  | 0.00  | 0.00  | 0.00  | 0.00  |
| 8    | 6  | 0.00  | 0.00  | 0.00  | 0.00  | 0.00  | 0.00  | 0.00  | 0.00  | 0.00  |
| 9    | 6  | 0.00  | 0.00  | 0.00  | 0.00  | 0.00  | 0.00  | 0.00  | 0.00  | 0.00  |
| 10   | 1  | 0.00  | 0.00  | 0.00  | 0.02  | -0.01 | 0.03  | 0.03  | -0.01 | 0.05  |
| 11   | 8  | 0.00  | 0.00  | 0.00  | 0.00  | 0.00  | 0.00  | 0.00  | 0.00  | 0.00  |
| 12   | 6  | 0.00  | 0.00  | 0.00  | 0.00  | -0.01 | -0.01 | 0.00  | 0.00  | 0.00  |
| 13   | 1  | 0.00  | 0.00  | 0.00  | -0.02 | 0.14  | 0.14  | 0.00  | 0.02  | 0.02  |
| 14   | 6  | 0.00  | 0.00  | 0.00  | 0.00  | 0.00  | 0.00  | 0.00  | 0.00  | 0.00  |
| 15   | 8  | 0.00  | 0.00  | 0.00  | 0.00  | 0.00  | 0.00  | 0.00  | 0.00  | 0.00  |
| 16   | 6  | 0.00  | 0.00  | 0.00  | 0.00  | 0.00  | 0.00  | 0.04  | -0.01 | -0.08 |
| 17   | 1  | 0.00  | 0.00  | 0.00  | 0.01  | 0.00  | -0.01 | -0.47 | -0.12 | 0.30  |
| 18   | 1  | 0.00  | 0.00  | 0.00  | 0.00  | -0.01 | -0.01 | 0.01  | 0.43  | 0.57  |
| 19   | 1  | 0.00  | 0.00  | 0.00  | 0.00  | 0.00  | 0.00  | 0.02  | -0.17 | 0.04  |
| 20   | 6  | 0.00  | 0.00  | 0.00  | 0.00  | 0.00  | 0.00  | 0.00  | 0.00  | 0.00  |
| 21   | 1  | 0.00  | 0.00  | 0.00  | 0.00  | 0.00  | 0.00  | 0.01  | 0.00  | 0.01  |
| 22   | 6  | 0.00  | 0.00  | 0.00  | 0.00  | 0.00  | 0.00  | 0.00  | 0.00  | 0.00  |
| 23   | 1  | 0.00  | 0.00  | 0.00  | 0.01  | 0.00  | 0.00  | 0.01  | 0.00  | 0.00  |
| 24   | 1  | 0.00  | 0.00  | 0.00  | 0.00  | 0.00  | 0.00  | 0.01  | 0.02  | 0.03  |
| 25   | 1  | 0.00  | 0.00  | 0.00  | 0.00  | 0.00  | 0.00  | -0.02 | -0.03 | 0.01  |
| 26   | 6  | 0.00  | 0.00  | 0.02  | 0.00  | 0.00  | 0.00  | 0.00  | 0.00  | 0.00  |
| 27   | 1  | -0.08 | -0.07 | -0.13 | 0.00  | 0.00  | 0.00  | 0.00  | 0.00  | 0.00  |
| 28   | 1  | 0.08  | 0.07  | -0.16 | 0.00  | 0.00  | 0.00  | 0.00  | 0.00  | 0.00  |

|    |   |       |       |       |       |       |       |       |       |       |
|----|---|-------|-------|-------|-------|-------|-------|-------|-------|-------|
| 29 | 6 | 0.00  | 0.00  | 0.00  | 0.00  | 0.00  | 0.00  | -0.03 | -0.01 | -0.01 |
| 30 | 1 | 0.00  | 0.00  | 0.00  | 0.00  | 0.00  | 0.00  | 0.08  | -0.04 | 0.12  |
| 31 | 1 | 0.00  | 0.00  | 0.00  | -0.01 | 0.00  | 0.00  | 0.26  | 0.12  | -0.02 |
| 32 | 6 | 0.00  | 0.00  | 0.00  | 0.00  | 0.00  | 0.00  | 0.00  | 0.00  | 0.00  |
| 33 | 1 | 0.00  | 0.00  | 0.00  | 0.00  | 0.00  | 0.00  | 0.01  | 0.00  | -0.01 |
| 34 | 6 | 0.00  | 0.00  | 0.00  | 0.00  | 0.00  | 0.00  | 0.00  | 0.00  | 0.00  |
| 35 | 1 | 0.00  | 0.00  | 0.00  | 0.00  | 0.00  | 0.00  | 0.00  | 0.00  | 0.00  |
| 36 | 6 | 0.00  | 0.00  | 0.00  | 0.00  | 0.00  | 0.00  | 0.00  | 0.00  | 0.00  |
| 37 | 1 | 0.00  | 0.00  | 0.00  | -0.01 | 0.02  | 0.01  | -0.01 | 0.02  | 0.02  |
| 38 | 1 | 0.00  | 0.00  | 0.00  | -0.01 | -0.02 | 0.01  | 0.00  | -0.01 | 0.00  |
| 39 | 1 | 0.00  | 0.00  | 0.00  | 0.03  | 0.00  | 0.00  | -0.01 | 0.00  | 0.00  |
| 40 | 6 | 0.00  | 0.00  | 0.00  | 0.00  | 0.00  | 0.00  | 0.00  | 0.00  | 0.00  |
| 41 | 1 | 0.00  | 0.01  | 0.01  | 0.00  | 0.00  | 0.00  | 0.00  | 0.00  | 0.00  |
| 42 | 6 | 0.00  | 0.00  | 0.00  | 0.00  | 0.00  | 0.00  | 0.00  | 0.00  | 0.00  |
| 43 | 1 | -0.02 | -0.01 | -0.02 | 0.00  | 0.00  | 0.00  | 0.00  | 0.00  | 0.00  |
| 44 | 1 | 0.00  | -0.02 | 0.00  | 0.00  | 0.00  | 0.00  | 0.00  | 0.00  | 0.00  |
| 45 | 1 | 0.01  | 0.00  | 0.00  | 0.00  | 0.00  | 0.00  | 0.00  | 0.00  | 0.00  |
| 46 | 6 | 0.00  | 0.00  | 0.00  | 0.00  | 0.00  | 0.00  | 0.00  | 0.00  | 0.00  |
| 47 | 1 | 0.01  | 0.01  | 0.01  | 0.00  | 0.00  | 0.00  | 0.00  | 0.00  | 0.00  |
| 48 | 6 | -0.04 | -0.01 | 0.06  | 0.00  | 0.00  | 0.00  | 0.00  | 0.00  | 0.00  |
| 49 | 1 | 0.50  | -0.17 | -0.42 | 0.00  | 0.00  | 0.00  | 0.00  | 0.00  | 0.00  |
| 50 | 1 | 0.04  | 0.31  | -0.27 | 0.00  | 0.00  | 0.00  | 0.00  | 0.00  | 0.00  |
| 51 | 6 | -0.02 | -0.03 | 0.03  | 0.00  | 0.00  | 0.00  | 0.00  | 0.00  | 0.00  |
| 52 | 1 | 0.18  | 0.34  | -0.39 | 0.00  | 0.00  | 0.00  | 0.00  | 0.00  | 0.00  |
| 53 | 6 | 0.00  | 0.00  | 0.00  | 0.00  | 0.00  | 0.00  | 0.00  | 0.00  | 0.00  |
| 54 | 1 | 0.00  | 0.00  | 0.00  | 0.00  | 0.00  | 0.00  | 0.00  | 0.00  | 0.00  |
| 55 | 6 | 0.00  | 0.00  | 0.00  | 0.00  | 0.00  | 0.00  | 0.00  | 0.00  | 0.00  |
| 56 | 1 | 0.00  | 0.00  | 0.00  | 0.00  | 0.00  | 0.00  | 0.00  | 0.00  | 0.00  |
| 57 | 6 | 0.00  | 0.00  | 0.00  | 0.00  | 0.00  | 0.00  | 0.00  | 0.00  | 0.00  |
| 58 | 1 | 0.00  | -0.01 | 0.00  | 0.00  | 0.00  | 0.00  | 0.00  | 0.00  | 0.00  |
| 59 | 8 | 0.00  | 0.00  | 0.00  | 0.00  | 0.00  | 0.00  | 0.00  | 0.00  | 0.00  |
| 60 | 8 | 0.00  | 0.00  | 0.00  | 0.00  | 0.00  | 0.00  | 0.00  | 0.00  | 0.00  |
| 61 | 8 | 0.00  | 0.00  | 0.00  | 0.00  | 0.00  | 0.00  | 0.00  | 0.00  | 0.00  |
| 62 | 6 | 0.00  | 0.00  | 0.00  | 0.00  | 0.00  | 0.00  | 0.00  | 0.00  | 0.00  |
| 63 | 6 | 0.00  | 0.00  | 0.00  | 0.00  | 0.00  | 0.00  | 0.00  | 0.00  | 0.00  |
| 64 | 6 | 0.00  | 0.00  | 0.00  | 0.00  | 0.00  | 0.00  | 0.00  | 0.00  | 0.00  |
| 65 | 8 | 0.00  | 0.00  | 0.00  | 0.00  | 0.00  | 0.00  | 0.00  | 0.00  | 0.00  |
| 66 | 1 | 0.00  | 0.00  | 0.00  | 0.01  | 0.00  | -0.01 | 0.00  | 0.00  | 0.00  |
| 67 | 6 | 0.00  | 0.00  | 0.00  | 0.01  | 0.00  | -0.01 | 0.00  | 0.00  | 0.00  |
| 68 | 1 | 0.00  | 0.00  | 0.00  | -0.06 | 0.02  | 0.08  | 0.00  | 0.00  | 0.00  |
| 69 | 1 | 0.00  | 0.00  | 0.00  | -0.04 | 0.00  | -0.02 | 0.00  | 0.00  | 0.00  |
| 70 | 1 | 0.00  | 0.00  | 0.00  | 0.01  | -0.02 | 0.01  | 0.00  | 0.00  | 0.00  |
| 71 | 6 | 0.00  | 0.00  | 0.00  | -0.06 | 0.05  | -0.03 | 0.00  | 0.00  | 0.00  |
| 72 | 1 | 0.00  | 0.00  | 0.00  | 0.23  | 0.20  | 0.02  | 0.00  | 0.00  | 0.00  |
| 73 | 1 | 0.00  | 0.00  | 0.00  | 0.18  | -0.06 | 0.37  | 0.00  | 0.00  | 0.01  |
| 74 | 1 | 0.00  | 0.00  | 0.00  | 0.26  | -0.78 | -0.01 | 0.00  | -0.01 | 0.00  |

199

200

201

A

A

A

|                |           |           |           |
|----------------|-----------|-----------|-----------|
| Frequencies -- | 3096.4047 | 3114.3611 | 3117.6245 |
| Red. masses -- | 1.1058    | 1.0964    | 1.1021    |
| Frc consts --  | 6.2466    | 6.2655    | 6.3116    |
| IR Inten --    | 37.8710   | 15.0158   | 42.6809   |

|                |          |         |         |
|----------------|----------|---------|---------|
| Raman Activ -- | 128.8493 | 50.5369 | 65.9695 |
| Depolar (P) -- | 0.5273   | 0.6171  | 0.6724  |
| Depolar (U) -- | 0.6905   | 0.7632  | 0.8041  |

|    |   |      |      |      |       |       |       |      |      |       |
|----|---|------|------|------|-------|-------|-------|------|------|-------|
| 49 | 1 | 0.00 | 0.00 | 0.00 | 0.00  | 0.00  | 0.00  | 0.00 | 0.00 | 0.00  |
| 50 | 1 | 0.00 | 0.00 | 0.00 | 0.00  | 0.00  | 0.00  | 0.00 | 0.01 | -0.01 |
| 51 | 6 | 0.00 | 0.00 | 0.00 | 0.00  | 0.00  | 0.00  | 0.00 | 0.00 | 0.00  |
| 52 | 1 | 0.00 | 0.00 | 0.00 | 0.00  | 0.00  | 0.00  | 0.00 | 0.00 | 0.00  |
| 53 | 6 | 0.00 | 0.00 | 0.00 | 0.00  | 0.00  | 0.00  | 0.00 | 0.00 | 0.00  |
| 54 | 1 | 0.00 | 0.00 | 0.00 | 0.00  | 0.00  | 0.00  | 0.00 | 0.00 | 0.00  |
| 55 | 6 | 0.00 | 0.00 | 0.00 | 0.00  | 0.00  | 0.00  | 0.00 | 0.00 | 0.00  |
| 56 | 1 | 0.00 | 0.00 | 0.00 | 0.00  | 0.00  | 0.00  | 0.00 | 0.00 | 0.00  |
| 57 | 6 | 0.00 | 0.00 | 0.00 | 0.00  | 0.00  | 0.00  | 0.00 | 0.00 | 0.00  |
| 58 | 1 | 0.00 | 0.00 | 0.00 | 0.00  | 0.00  | 0.00  | 0.00 | 0.00 | 0.00  |
| 59 | 8 | 0.00 | 0.00 | 0.00 | 0.00  | 0.00  | 0.00  | 0.00 | 0.00 | 0.00  |
| 60 | 8 | 0.00 | 0.00 | 0.00 | 0.00  | 0.00  | 0.00  | 0.00 | 0.00 | 0.00  |
| 61 | 8 | 0.00 | 0.00 | 0.00 | 0.00  | 0.00  | 0.00  | 0.00 | 0.00 | 0.00  |
| 62 | 6 | 0.00 | 0.00 | 0.00 | 0.00  | 0.00  | 0.00  | 0.00 | 0.00 | 0.00  |
| 63 | 6 | 0.00 | 0.00 | 0.00 | 0.00  | 0.00  | 0.00  | 0.00 | 0.00 | 0.00  |
| 64 | 6 | 0.00 | 0.00 | 0.00 | -0.01 | 0.00  | 0.01  | 0.00 | 0.00 | 0.00  |
| 65 | 8 | 0.00 | 0.00 | 0.00 | 0.00  | 0.00  | 0.00  | 0.00 | 0.00 | 0.00  |
| 66 | 1 | 0.00 | 0.00 | 0.00 | 0.10  | -0.04 | -0.14 | 0.00 | 0.00 | 0.00  |
| 67 | 6 | 0.00 | 0.00 | 0.00 | 0.06  | 0.00  | -0.07 | 0.00 | 0.00 | 0.00  |
| 68 | 1 | 0.00 | 0.00 | 0.00 | -0.55 | 0.18  | 0.71  | 0.01 | 0.00 | -0.01 |
| 69 | 1 | 0.00 | 0.00 | 0.00 | -0.19 | -0.01 | -0.08 | 0.00 | 0.00 | 0.00  |
| 70 | 1 | 0.00 | 0.00 | 0.00 | 0.04  | -0.17 | 0.16  | 0.00 | 0.00 | 0.00  |
| 71 | 6 | 0.00 | 0.00 | 0.00 | 0.01  | 0.00  | 0.00  | 0.00 | 0.00 | 0.00  |
| 72 | 1 | 0.00 | 0.00 | 0.00 | -0.13 | -0.10 | -0.01 | 0.00 | 0.00 | 0.00  |
| 73 | 1 | 0.00 | 0.00 | 0.00 | -0.02 | 0.01  | -0.04 | 0.00 | 0.00 | 0.00  |
| 74 | 1 | 0.00 | 0.00 | 0.00 | -0.01 | 0.05  | 0.00  | 0.00 | 0.00 | 0.00  |

202

203

204

A

A

A

|                |           |           |           |
|----------------|-----------|-----------|-----------|
| Frequencies -- | 3117.7464 | 3126.9990 | 3128.8878 |
| Red. masses -- | 1.0985    | 1.0981    | 1.0979    |
| Frc consts --  | 6.2911    | 6.3264    | 6.3328    |
| IR Inten --    | 23.7067   | 17.0081   | 22.2917   |
| Raman Activ -- | 31.1452   | 33.4903   | 63.1795   |
| Depolar (P) -- | 0.7399    | 0.5113    | 0.7400    |
| Depolar (U) -- | 0.8505    | 0.6767    | 0.8506    |

| Atom | AN | X    | Y    | Z     | X    | Y     | Z     | X    | Y    | Z    |
|------|----|------|------|-------|------|-------|-------|------|------|------|
| 1    | 6  | 0.00 | 0.00 | 0.00  | 0.00 | 0.00  | 0.00  | 0.00 | 0.00 | 0.00 |
| 2    | 6  | 0.00 | 0.00 | 0.00  | 0.00 | 0.00  | 0.00  | 0.00 | 0.00 | 0.00 |
| 3    | 6  | 0.00 | 0.00 | 0.00  | 0.00 | 0.00  | 0.00  | 0.00 | 0.00 | 0.00 |
| 4    | 6  | 0.00 | 0.00 | 0.00  | 0.00 | 0.00  | 0.00  | 0.00 | 0.00 | 0.00 |
| 5    | 6  | 0.00 | 0.00 | 0.00  | 0.00 | 0.00  | 0.00  | 0.00 | 0.00 | 0.00 |
| 6    | 6  | 0.00 | 0.00 | 0.00  | 0.00 | 0.00  | 0.00  | 0.00 | 0.00 | 0.00 |
| 7    | 8  | 0.00 | 0.00 | 0.00  | 0.00 | 0.00  | 0.00  | 0.00 | 0.00 | 0.00 |
| 8    | 6  | 0.00 | 0.00 | 0.00  | 0.00 | 0.00  | 0.00  | 0.00 | 0.00 | 0.00 |
| 9    | 6  | 0.00 | 0.00 | 0.00  | 0.00 | 0.00  | -0.01 | 0.00 | 0.00 | 0.00 |
| 10   | 1  | 0.00 | 0.00 | -0.01 | 0.04 | -0.01 | 0.08  | 0.00 | 0.00 | 0.00 |
| 11   | 8  | 0.00 | 0.00 | 0.00  | 0.00 | 0.00  | 0.00  | 0.00 | 0.00 | 0.00 |
| 12   | 6  | 0.00 | 0.00 | 0.00  | 0.00 | 0.00  | 0.00  | 0.00 | 0.00 | 0.00 |
| 13   | 1  | 0.00 | 0.00 | 0.00  | 0.00 | -0.02 | -0.02 | 0.00 | 0.00 | 0.00 |
| 14   | 6  | 0.00 | 0.00 | 0.00  | 0.00 | 0.00  | 0.00  | 0.00 | 0.00 | 0.00 |
| 15   | 8  | 0.00 | 0.00 | 0.00  | 0.00 | 0.00  | 0.00  | 0.00 | 0.00 | 0.00 |
| 16   | 6  | 0.00 | 0.00 | 0.00  | 0.00 | 0.02  | 0.00  | 0.00 | 0.00 | 0.00 |

|    |   |       |       |       |       |       |       |       |       |       |
|----|---|-------|-------|-------|-------|-------|-------|-------|-------|-------|
| 17 | 1 | -0.01 | 0.00  | 0.00  | -0.03 | 0.00  | 0.02  | 0.00  | 0.00  | 0.00  |
| 18 | 1 | 0.00  | -0.01 | -0.02 | 0.00  | -0.04 | -0.05 | 0.00  | 0.00  | 0.00  |
| 19 | 1 | 0.00  | -0.04 | 0.01  | 0.01  | -0.16 | 0.05  | 0.00  | 0.01  | 0.00  |
| 20 | 6 | 0.00  | 0.00  | 0.00  | 0.00  | 0.00  | 0.00  | 0.00  | 0.00  | 0.00  |
| 21 | 1 | 0.00  | 0.00  | 0.00  | 0.00  | 0.00  | 0.01  | 0.00  | 0.00  | 0.00  |
| 22 | 6 | 0.01  | -0.01 | -0.01 | 0.03  | -0.01 | -0.03 | 0.00  | 0.00  | 0.00  |
| 23 | 1 | -0.12 | 0.05  | 0.05  | -0.29 | 0.12  | 0.12  | 0.01  | 0.00  | 0.00  |
| 24 | 1 | 0.03  | 0.07  | 0.09  | 0.06  | 0.17  | 0.20  | 0.00  | 0.00  | 0.00  |
| 25 | 1 | 0.00  | -0.01 | 0.00  | -0.09 | -0.14 | 0.05  | 0.00  | 0.01  | 0.00  |
| 26 | 6 | 0.00  | 0.00  | 0.00  | 0.00  | 0.00  | 0.00  | 0.00  | 0.00  | 0.00  |
| 27 | 1 | 0.01  | 0.01  | 0.02  | 0.00  | 0.00  | 0.00  | 0.00  | 0.00  | 0.00  |
| 28 | 1 | 0.00  | 0.00  | 0.01  | 0.00  | 0.00  | 0.00  | 0.00  | 0.00  | 0.00  |
| 29 | 6 | 0.00  | 0.00  | 0.00  | 0.00  | 0.00  | 0.00  | 0.00  | 0.00  | 0.00  |
| 30 | 1 | 0.00  | 0.00  | 0.00  | 0.00  | 0.00  | 0.00  | 0.00  | 0.00  | 0.00  |
| 31 | 1 | -0.01 | 0.00  | 0.00  | -0.01 | 0.00  | 0.00  | 0.00  | 0.00  | 0.00  |
| 32 | 6 | 0.00  | 0.00  | 0.00  | 0.00  | 0.00  | 0.00  | 0.00  | 0.00  | 0.00  |
| 33 | 1 | 0.00  | 0.00  | 0.00  | 0.00  | 0.00  | 0.00  | 0.00  | 0.00  | 0.00  |
| 34 | 6 | 0.00  | 0.00  | 0.00  | 0.00  | 0.00  | 0.00  | 0.00  | 0.00  | 0.00  |
| 35 | 1 | 0.00  | 0.00  | 0.00  | 0.00  | 0.00  | 0.00  | 0.00  | 0.00  | 0.00  |
| 36 | 6 | 0.01  | -0.01 | 0.00  | -0.06 | 0.05  | 0.01  | 0.00  | 0.00  | 0.00  |
| 37 | 1 | -0.02 | 0.05  | 0.03  | 0.14  | -0.42 | -0.26 | -0.01 | 0.02  | 0.01  |
| 38 | 1 | 0.00  | 0.00  | 0.00  | -0.08 | -0.09 | 0.06  | 0.00  | 0.01  | 0.00  |
| 39 | 1 | -0.07 | 0.01  | -0.01 | 0.66  | -0.06 | 0.06  | -0.02 | 0.00  | 0.00  |
| 40 | 6 | 0.00  | 0.00  | 0.00  | 0.00  | 0.00  | 0.00  | 0.00  | 0.00  | 0.00  |
| 41 | 1 | 0.00  | 0.00  | 0.00  | 0.00  | 0.00  | 0.00  | 0.00  | 0.00  | 0.00  |
| 42 | 6 | -0.05 | -0.07 | -0.02 | 0.00  | 0.00  | 0.00  | 0.00  | 0.00  | 0.00  |
| 43 | 1 | 0.38  | 0.22  | 0.39  | 0.00  | 0.00  | 0.00  | 0.00  | 0.00  | 0.00  |
| 44 | 1 | -0.05 | 0.73  | -0.04 | 0.00  | 0.00  | 0.00  | 0.00  | 0.00  | 0.00  |
| 45 | 1 | 0.24  | -0.09 | -0.07 | -0.01 | 0.00  | 0.00  | 0.01  | 0.00  | 0.00  |
| 46 | 6 | 0.00  | 0.00  | 0.00  | 0.00  | 0.00  | 0.00  | 0.01  | 0.01  | 0.01  |
| 47 | 1 | 0.00  | 0.00  | 0.00  | 0.00  | 0.00  | 0.00  | -0.09 | -0.13 | -0.10 |
| 48 | 6 | 0.00  | 0.00  | 0.00  | 0.00  | 0.00  | 0.00  | 0.00  | 0.00  | 0.00  |
| 49 | 1 | 0.02  | 0.00  | -0.01 | 0.00  | 0.00  | 0.00  | 0.01  | 0.00  | -0.01 |
| 50 | 1 | 0.00  | 0.03  | -0.03 | 0.00  | 0.00  | 0.00  | 0.00  | 0.00  | 0.00  |
| 51 | 6 | 0.00  | 0.00  | 0.00  | 0.00  | 0.00  | 0.00  | 0.00  | 0.00  | 0.00  |
| 52 | 1 | 0.00  | 0.00  | 0.00  | 0.00  | 0.00  | 0.00  | 0.00  | 0.00  | 0.00  |
| 53 | 6 | 0.00  | 0.00  | 0.00  | 0.00  | 0.00  | 0.00  | 0.00  | 0.00  | 0.00  |
| 54 | 1 | 0.00  | 0.00  | 0.00  | 0.00  | 0.00  | 0.00  | 0.00  | 0.00  | 0.00  |
| 55 | 6 | 0.00  | 0.00  | 0.00  | 0.00  | 0.00  | 0.00  | 0.00  | 0.00  | 0.00  |
| 56 | 1 | 0.00  | 0.00  | 0.00  | 0.00  | 0.00  | 0.00  | 0.00  | 0.00  | 0.00  |
| 57 | 6 | 0.00  | 0.00  | 0.00  | 0.00  | 0.00  | 0.00  | 0.00  | 0.00  | 0.00  |
| 58 | 1 | 0.00  | 0.00  | 0.00  | 0.00  | 0.00  | 0.00  | 0.00  | 0.00  | 0.00  |
| 59 | 8 | 0.00  | 0.00  | 0.00  | 0.00  | 0.00  | 0.00  | 0.00  | 0.00  | 0.00  |
| 60 | 8 | 0.00  | 0.00  | 0.00  | 0.00  | 0.00  | 0.00  | 0.00  | 0.00  | 0.00  |
| 61 | 8 | 0.00  | 0.00  | 0.00  | 0.00  | 0.00  | 0.00  | 0.00  | 0.00  | 0.00  |
| 62 | 6 | 0.00  | 0.00  | 0.00  | 0.00  | 0.00  | 0.00  | 0.00  | 0.00  | 0.00  |
| 63 | 6 | 0.00  | 0.00  | 0.00  | 0.00  | 0.00  | 0.00  | 0.00  | 0.00  | 0.00  |
| 64 | 6 | 0.00  | 0.00  | 0.00  | 0.00  | 0.00  | 0.00  | 0.00  | 0.00  | 0.00  |
| 65 | 8 | 0.00  | 0.00  | 0.00  | 0.00  | 0.00  | 0.00  | 0.00  | 0.00  | 0.00  |
| 66 | 1 | 0.00  | 0.00  | 0.00  | 0.00  | 0.00  | 0.00  | -0.02 | 0.01  | 0.03  |
| 67 | 6 | 0.00  | 0.00  | 0.00  | 0.00  | 0.00  | 0.00  | -0.01 | 0.00  | 0.01  |
| 68 | 1 | 0.00  | 0.00  | 0.00  | 0.00  | 0.00  | 0.00  | 0.07  | -0.03 | -0.09 |

|                |    |           |       |       |           |       |       |           |       |       |
|----------------|----|-----------|-------|-------|-----------|-------|-------|-----------|-------|-------|
| 69             | 1  | 0.00      | 0.00  | 0.00  | 0.00      | 0.00  | 0.00  | 0.02      | 0.00  | 0.01  |
| 70             | 1  | 0.00      | 0.00  | 0.00  | 0.00      | 0.00  | 0.00  | -0.01     | 0.02  | -0.02 |
| 71             | 6  | 0.00      | 0.00  | 0.00  | 0.00      | 0.00  | 0.00  | 0.05      | 0.07  | 0.01  |
| 72             | 1  | 0.01      | 0.01  | 0.00  | -0.03     | -0.02 | 0.00  | -0.69     | -0.53 | -0.07 |
| 73             | 1  | 0.00      | 0.00  | 0.00  | 0.00      | 0.00  | -0.01 | -0.05     | 0.04  | -0.11 |
| 74             | 1  | 0.00      | 0.00  | 0.00  | 0.00      | -0.01 | 0.00  | 0.14      | -0.37 | 0.00  |
|                |    | 205       |       |       | 206       |       |       | 207       |       |       |
|                |    | A         |       |       | A         |       |       | A         |       |       |
| Frequencies -- |    | 3133.2766 |       |       | 3140.7401 |       |       | 3142.6825 |       |       |
| Red. masses -- |    | 1.0879    |       |       | 1.1009    |       |       | 1.0993    |       |       |
| Frc consts --  |    | 6.2929    |       |       | 6.3981    |       |       | 6.3968    |       |       |
| IR Inten --    |    | 15.6709   |       |       | 10.7253   |       |       | 24.9730   |       |       |
| Raman Activ -- |    | 134.2014  |       |       | 48.1146   |       |       | 51.1801   |       |       |
| Depolar (P) -- |    | 0.3881    |       |       | 0.7055    |       |       | 0.6985    |       |       |
| Depolar (U) -- |    | 0.5591    |       |       | 0.8273    |       |       | 0.8225    |       |       |
| Atom           | AN | X         | Y     | Z     | X         | Y     | Z     | X         | Y     | Z     |
| 1              | 6  | 0.00      | 0.00  | 0.00  | 0.00      | 0.00  | 0.00  | 0.00      | 0.00  | 0.00  |
| 2              | 6  | 0.00      | 0.00  | 0.00  | 0.00      | 0.00  | 0.00  | 0.00      | 0.00  | 0.00  |
| 3              | 6  | 0.00      | 0.00  | 0.00  | 0.00      | 0.00  | 0.00  | 0.00      | 0.00  | 0.00  |
| 4              | 6  | 0.00      | 0.00  | 0.00  | 0.00      | 0.00  | 0.00  | 0.00      | 0.00  | 0.00  |
| 5              | 6  | 0.00      | 0.00  | 0.00  | 0.00      | 0.00  | 0.00  | 0.00      | 0.00  | 0.00  |
| 6              | 6  | 0.00      | 0.00  | 0.00  | 0.00      | 0.00  | 0.00  | 0.00      | 0.00  | 0.00  |
| 7              | 8  | 0.00      | 0.00  | 0.00  | 0.00      | 0.00  | 0.00  | 0.00      | 0.00  | 0.00  |
| 8              | 6  | 0.00      | 0.00  | 0.00  | 0.00      | 0.00  | 0.00  | 0.00      | 0.00  | 0.00  |
| 9              | 6  | 0.00      | 0.00  | 0.00  | 0.00      | 0.00  | 0.00  | 0.00      | 0.00  | 0.00  |
| 10             | 1  | 0.00      | 0.00  | 0.00  | 0.01      | 0.00  | 0.03  | 0.00      | 0.00  | 0.00  |
| 11             | 8  | 0.00      | 0.00  | 0.00  | 0.00      | 0.00  | 0.00  | 0.00      | 0.00  | 0.00  |
| 12             | 6  | 0.00      | 0.00  | 0.00  | 0.00      | 0.00  | 0.00  | 0.00      | 0.00  | 0.00  |
| 13             | 1  | 0.00      | 0.00  | 0.00  | 0.00      | 0.00  | 0.00  | 0.00      | -0.01 | -0.01 |
| 14             | 6  | 0.00      | 0.00  | 0.00  | 0.00      | 0.00  | 0.00  | 0.00      | 0.00  | 0.00  |
| 15             | 8  | 0.00      | 0.00  | 0.00  | 0.00      | 0.00  | 0.00  | 0.00      | 0.00  | 0.00  |
| 16             | 6  | 0.00      | 0.00  | 0.00  | 0.00      | -0.04 | 0.00  | 0.00      | 0.00  | 0.00  |
| 17             | 1  | -0.02     | 0.00  | 0.01  | 0.05      | 0.00  | -0.03 | 0.00      | 0.00  | 0.00  |
| 18             | 1  | 0.00      | 0.00  | 0.00  | 0.00      | 0.09  | 0.13  | 0.00      | 0.00  | 0.00  |
| 19             | 1  | 0.00      | 0.01  | 0.00  | -0.01     | 0.39  | -0.12 | 0.00      | 0.00  | 0.00  |
| 20             | 6  | 0.00      | 0.00  | 0.00  | 0.00      | 0.00  | 0.00  | 0.00      | 0.00  | 0.00  |
| 21             | 1  | 0.00      | 0.00  | 0.00  | 0.00      | 0.00  | 0.00  | 0.00      | 0.00  | 0.00  |
| 22             | 6  | 0.00      | 0.00  | 0.00  | -0.05     | -0.07 | 0.00  | 0.00      | 0.00  | 0.00  |
| 23             | 1  | 0.00      | 0.00  | 0.00  | 0.07      | -0.05 | -0.03 | 0.00      | 0.00  | 0.00  |
| 24             | 1  | 0.00      | 0.00  | 0.00  | 0.08      | 0.27  | 0.33  | 0.00      | 0.00  | 0.00  |
| 25             | 1  | 0.00      | 0.00  | 0.00  | 0.42      | 0.57  | -0.27 | 0.00      | -0.01 | 0.00  |
| 26             | 6  | 0.00      | 0.00  | 0.00  | 0.00      | 0.00  | 0.00  | 0.00      | 0.00  | 0.00  |
| 27             | 1  | 0.00      | 0.00  | 0.00  | 0.00      | 0.00  | 0.00  | 0.00      | 0.00  | 0.00  |
| 28             | 1  | 0.00      | 0.00  | 0.00  | 0.00      | 0.00  | 0.00  | 0.00      | 0.00  | 0.00  |
| 29             | 6  | 0.00      | 0.00  | 0.00  | 0.00      | 0.00  | 0.00  | 0.00      | 0.00  | 0.00  |
| 30             | 1  | 0.01      | 0.00  | 0.01  | 0.00      | 0.00  | 0.01  | 0.00      | 0.00  | 0.00  |
| 31             | 1  | -0.01     | -0.01 | 0.00  | 0.01      | 0.01  | 0.00  | 0.00      | 0.00  | 0.00  |
| 32             | 6  | 0.05      | 0.01  | -0.06 | 0.00      | 0.00  | 0.00  | 0.00      | 0.00  | 0.00  |
| 33             | 1  | -0.62     | -0.13 | 0.73  | 0.01      | 0.00  | -0.01 | 0.00      | 0.00  | 0.00  |
| 34             | 6  | 0.00      | 0.01  | 0.02  | 0.00      | 0.00  | 0.00  | 0.00      | 0.00  | 0.00  |
| 35             | 1  | 0.01      | -0.16 | -0.19 | 0.00      | 0.00  | 0.00  | 0.00      | 0.00  | 0.00  |
| 36             | 6  | 0.00      | 0.00  | 0.00  | -0.01     | 0.01  | 0.00  | 0.00      | 0.00  | 0.00  |





|    |   |       |       |       |       |       |       |      |      |      |
|----|---|-------|-------|-------|-------|-------|-------|------|------|------|
| 5  | 6 | 0.00  | 0.00  | 0.00  | 0.00  | 0.00  | 0.00  | 0.00 | 0.00 | 0.00 |
| 6  | 6 | 0.00  | 0.00  | 0.00  | 0.00  | 0.00  | 0.00  | 0.00 | 0.00 | 0.00 |
| 7  | 8 | 0.00  | 0.00  | 0.00  | 0.00  | 0.00  | 0.00  | 0.00 | 0.00 | 0.00 |
| 8  | 6 | 0.00  | 0.00  | 0.00  | 0.00  | 0.00  | 0.00  | 0.00 | 0.00 | 0.00 |
| 9  | 6 | 0.00  | 0.00  | 0.00  | 0.00  | 0.00  | 0.00  | 0.00 | 0.00 | 0.00 |
| 10 | 1 | 0.00  | 0.00  | 0.00  | 0.00  | 0.00  | 0.00  | 0.00 | 0.00 | 0.00 |
| 11 | 8 | 0.00  | 0.00  | 0.00  | 0.00  | 0.00  | 0.00  | 0.00 | 0.00 | 0.00 |
| 12 | 6 | 0.00  | 0.00  | 0.00  | 0.00  | 0.00  | 0.00  | 0.00 | 0.00 | 0.00 |
| 13 | 1 | 0.00  | 0.02  | 0.02  | 0.00  | 0.00  | 0.00  | 0.00 | 0.00 | 0.00 |
| 14 | 6 | 0.00  | 0.00  | 0.00  | 0.00  | 0.00  | 0.00  | 0.00 | 0.00 | 0.00 |
| 15 | 8 | 0.00  | 0.00  | 0.00  | 0.00  | 0.00  | 0.00  | 0.00 | 0.00 | 0.00 |
| 16 | 6 | 0.00  | 0.00  | 0.00  | -0.01 | -0.08 | 0.01  | 0.00 | 0.00 | 0.00 |
| 17 | 1 | 0.00  | 0.00  | 0.00  | 0.11  | 0.01  | -0.07 | 0.00 | 0.00 | 0.00 |
| 18 | 1 | 0.00  | 0.00  | 0.00  | 0.00  | 0.15  | 0.22  | 0.00 | 0.00 | 0.00 |
| 19 | 1 | 0.00  | -0.01 | 0.00  | -0.02 | 0.75  | -0.24 | 0.00 | 0.00 | 0.00 |
| 20 | 6 | 0.00  | 0.00  | 0.00  | 0.00  | 0.00  | 0.00  | 0.00 | 0.00 | 0.00 |
| 21 | 1 | 0.00  | 0.00  | 0.00  | 0.00  | 0.00  | 0.00  | 0.00 | 0.00 | 0.00 |
| 22 | 6 | 0.00  | 0.00  | 0.00  | 0.04  | 0.02  | -0.02 | 0.00 | 0.00 | 0.00 |
| 23 | 1 | 0.00  | 0.00  | 0.00  | -0.28 | 0.12  | 0.11  | 0.00 | 0.00 | 0.00 |
| 24 | 1 | 0.00  | 0.00  | 0.00  | -0.01 | -0.04 | -0.06 | 0.00 | 0.00 | 0.00 |
| 25 | 1 | 0.00  | 0.01  | 0.00  | -0.23 | -0.31 | 0.14  | 0.00 | 0.00 | 0.00 |
| 26 | 6 | 0.00  | 0.00  | 0.00  | 0.00  | 0.00  | 0.00  | 0.00 | 0.00 | 0.00 |
| 27 | 1 | 0.00  | 0.00  | 0.00  | 0.00  | 0.00  | 0.00  | 0.00 | 0.00 | 0.00 |
| 28 | 1 | 0.00  | 0.00  | 0.00  | 0.00  | 0.00  | 0.00  | 0.00 | 0.00 | 0.00 |
| 29 | 6 | 0.00  | 0.00  | 0.00  | 0.00  | 0.00  | 0.00  | 0.00 | 0.00 | 0.00 |
| 30 | 1 | 0.00  | 0.00  | 0.00  | 0.00  | 0.00  | 0.01  | 0.00 | 0.00 | 0.00 |
| 31 | 1 | 0.00  | 0.00  | 0.00  | 0.02  | 0.01  | 0.00  | 0.00 | 0.00 | 0.00 |
| 32 | 6 | 0.00  | 0.00  | 0.00  | 0.00  | 0.00  | 0.00  | 0.00 | 0.00 | 0.00 |
| 33 | 1 | 0.00  | 0.00  | 0.00  | 0.01  | 0.00  | -0.01 | 0.00 | 0.00 | 0.00 |
| 34 | 6 | 0.00  | 0.00  | 0.00  | 0.00  | 0.00  | 0.00  | 0.00 | 0.00 | 0.00 |
| 35 | 1 | 0.00  | 0.00  | 0.00  | 0.00  | 0.00  | 0.00  | 0.00 | 0.00 | 0.00 |
| 36 | 6 | 0.00  | 0.00  | 0.00  | 0.00  | 0.00  | 0.00  | 0.00 | 0.00 | 0.00 |
| 37 | 1 | 0.00  | 0.00  | 0.00  | 0.00  | 0.01  | 0.00  | 0.00 | 0.00 | 0.00 |
| 38 | 1 | -0.01 | -0.02 | 0.01  | 0.01  | 0.01  | 0.00  | 0.00 | 0.00 | 0.00 |
| 39 | 1 | -0.01 | 0.00  | 0.00  | -0.01 | 0.00  | 0.00  | 0.00 | 0.00 | 0.00 |
| 40 | 6 | 0.00  | 0.00  | 0.00  | 0.00  | 0.00  | 0.00  | 0.00 | 0.00 | 0.00 |
| 41 | 1 | 0.00  | 0.00  | 0.00  | 0.00  | 0.00  | 0.00  | 0.00 | 0.00 | 0.00 |
| 42 | 6 | -0.01 | 0.01  | 0.00  | 0.00  | 0.00  | 0.00  | 0.00 | 0.00 | 0.00 |
| 43 | 1 | 0.01  | 0.01  | 0.02  | 0.00  | 0.00  | 0.00  | 0.00 | 0.00 | 0.00 |
| 44 | 1 | 0.00  | -0.06 | 0.00  | 0.00  | 0.00  | 0.00  | 0.00 | 0.00 | 0.00 |
| 45 | 1 | 0.14  | -0.04 | -0.04 | 0.00  | 0.00  | 0.00  | 0.00 | 0.00 | 0.00 |
| 46 | 6 | -0.04 | -0.06 | -0.05 | 0.00  | 0.00  | 0.00  | 0.00 | 0    |      |

|    |   |       |       |       |      |      |      |       |       |       |
|----|---|-------|-------|-------|------|------|------|-------|-------|-------|
| 57 | 6 | 0.00  | 0.00  | 0.00  | 0.00 | 0.00 | 0.00 | 0.00  | 0.00  | 0.00  |
| 58 | 1 | 0.00  | 0.00  | 0.00  | 0.00 | 0.00 | 0.00 | 0.00  | 0.00  | 0.00  |
| 59 | 8 | 0.00  | 0.00  | 0.00  | 0.00 | 0.00 | 0.00 | 0.00  | 0.00  | 0.00  |
| 60 | 8 | 0.00  | 0.00  | 0.00  | 0.00 | 0.00 | 0.00 | 0.00  | 0.00  | 0.00  |
| 61 | 8 | 0.00  | 0.00  | 0.00  | 0.00 | 0.00 | 0.00 | 0.00  | 0.00  | 0.00  |
| 62 | 6 | 0.00  | 0.00  | 0.00  | 0.00 | 0.00 | 0.00 | 0.00  | 0.00  | 0.00  |
| 63 | 6 | 0.00  | 0.00  | 0.00  | 0.00 | 0.00 | 0.00 | 0.00  | 0.00  | 0.00  |
| 64 | 6 | 0.00  | 0.00  | 0.00  | 0.00 | 0.00 | 0.00 | 0.05  | -0.02 | -0.07 |
| 65 | 8 | 0.00  | 0.00  | 0.00  | 0.00 | 0.00 | 0.00 | 0.00  | 0.00  | 0.00  |
| 66 | 1 | 0.00  | 0.00  | 0.00  | 0.00 | 0.00 | 0.00 | -0.55 | 0.23  | 0.78  |
| 67 | 6 | 0.00  | 0.00  | 0.00  | 0.00 | 0.00 | 0.00 | 0.01  | 0.00  | -0.01 |
| 68 | 1 | 0.00  | 0.00  | -0.01 | 0.00 | 0.00 | 0.00 | -0.09 | 0.04  | 0.12  |
| 69 | 1 | 0.00  | 0.00  | 0.00  | 0.00 | 0.00 | 0.00 | -0.04 | -0.01 | -0.02 |
| 70 | 1 | 0.00  | 0.00  | 0.00  | 0.00 | 0.00 | 0.00 | 0.01  | -0.04 | 0.03  |
| 71 | 6 | 0.01  | 0.01  | 0.00  | 0.00 | 0.00 | 0.00 | 0.00  | 0.00  | 0.00  |
| 72 | 1 | -0.14 | -0.10 | -0.02 | 0.00 | 0.00 | 0.00 | 0.01  | 0.01  | 0.00  |
| 73 | 1 | -0.01 | 0.01  | -0.02 | 0.00 | 0.00 | 0.00 | 0.00  | 0.00  | 0.00  |
| 74 | 1 | 0.02  | -0.06 | 0.00  | 0.00 | 0.00 | 0.00 | 0.00  | 0.00  | 0.00  |

211

212

213

A

A

A

|                |           |           |           |
|----------------|-----------|-----------|-----------|
| Frequencies -- | 3172.7225 | 3175.4637 | 3189.5110 |
| Red. masses -- | 1.0994    | 1.0944    | 1.0882    |
| Frc consts --  | 6.5202    | 6.5016    | 6.5224    |
| IR Inten --    | 4.8286    | 11.8025   | 3.5332    |
| Raman Activ -- | 43.2929   | 201.1091  | 66.4094   |
| Depolar (P) -- | 0.6887    | 0.2542    | 0.1528    |
| Depolar (U) -- | 0.8156    | 0.4054    | 0.2651    |

| Atom | AN | X    | Y    | Z    | X    | Y    | Z    | X    | Y    | Z    |
|------|----|------|------|------|------|------|------|------|------|------|
| 1    | 6  | 0.00 | 0.00 | 0.00 | 0.00 | 0.00 | 0.00 | 0.00 | 0.00 | 0.00 |
| 2    | 6  | 0.00 | 0.00 | 0.00 | 0.00 | 0.00 | 0.00 | 0.00 | 0.00 | 0.00 |
| 3    | 6  | 0.00 | 0.00 | 0.00 | 0.00 | 0.00 | 0.00 | 0.00 | 0.00 | 0.00 |
| 4    | 6  | 0.00 | 0.00 | 0.00 | 0.00 | 0.00 | 0.00 | 0.00 | 0.00 | 0.00 |
| 5    | 6  | 0.00 | 0.00 | 0.00 | 0.00 | 0.00 | 0.00 | 0.00 | 0.00 | 0.00 |
| 6    | 6  | 0.00 | 0.00 | 0.00 | 0.00 | 0.00 | 0.00 | 0.00 | 0.00 | 0.00 |
| 7    | 8  | 0.00 | 0.00 | 0.00 | 0.00 | 0.00 | 0.00 | 0.00 | 0.00 | 0.00 |
| 8    | 6  | 0.00 | 0.00 | 0.00 | 0.00 | 0.00 | 0.00 | 0.00 | 0.00 | 0.00 |
| 9    | 6  | 0.00 | 0.00 | 0.00 | 0.00 | 0.00 | 0.00 | 0.00 | 0.00 | 0.00 |
| 10   | 1  | 0.01 | 0.00 | 0.02 | 0.00 | 0.00 | 0.00 | 0.00 | 0.00 | 0.00 |
| 11   | 8  | 0.00 | 0.00 | 0.00 | 0.00 | 0.00 | 0.00 | 0.00 | 0.00 | 0.00 |
| 12   | 6  | 0.00 | 0.00 | 0.00 | 0.00 | 0.00 | 0.00 | 0.00 | 0.00 | 0.00 |
| 13   | 1  | 0.00 | 0.01 | 0.01 | 0.00 | 0.00 | 0.00 | 0.00 | 0.00 | 0.00 |
| 14   | 6  | 0.00 | 0.00 | 0.00 | 0.00 | 0.00 | 0.00 | 0.00 | 0.00 | 0.00 |
| 15   | 8  | 0.00 | 0.00 | 0.00 | 0.00 | 0.00 | 0.00 | 0.00 | 0.00 | 0.00 |
| 16   | 6  | 0.00 | 0.00 | 0.00 | 0.00 | 0.00 | 0.00 | 0.00 | 0.00 | 0.00 |
| 17   | 1  | 0.00 | 0.00 | 0.00 | 0.00 | 0.00 | 0.00 | 0.00 | 0.00 | 0.00 |
| 18   | 1  | 0.00 | 0.00 | 0.00 | 0.00 | 0.00 | 0.00 | 0.00 | 0.00 | 0.00 |
| 19   | 1  | 0.00 | 0.00 | 0.00 | 0.00 | 0.00 | 0.00 | 0.00 | 0.00 | 0.00 |
| 20   | 6  | 0.00 | 0.00 | 0.00 | 0.00 | 0.00 | 0.00 | 0.00 | 0.00 | 0.00 |
| 21   | 1  | 0.00 | 0.00 | 0.00 | 0.00 | 0.00 | 0.00 | 0.00 | 0.00 | 0.00 |
| 22   | 6  | 0.00 | 0.00 | 0.00 | 0.00 | 0.00 | 0.00 | 0.00 | 0.00 | 0.00 |
| 23   | 1  | 0.00 | 0.00 | 0.00 | 0.00 | 0.00 | 0.00 | 0.00 | 0.00 | 0.00 |
| 24   | 1  | 0.01 | 0.02 | 0.03 | 0.00 | 0.00 | 0.00 | 0.00 | 0.00 | 0.00 |

|    |   |       |       |       |       |       |       |       |       |       |
|----|---|-------|-------|-------|-------|-------|-------|-------|-------|-------|
| 25 | 1 | 0.01  | 0.02  | -0.01 | 0.00  | 0.00  | 0.00  | 0.00  | 0.00  | 0.00  |
| 26 | 6 | 0.00  | 0.00  | 0.00  | 0.00  | 0.00  | 0.00  | 0.00  | 0.00  | 0.00  |
| 27 | 1 | 0.00  | 0.00  | 0.00  | 0.00  | 0.00  | 0.00  | 0.03  | 0.02  | 0.05  |
| 28 | 1 | 0.00  | 0.00  | 0.00  | 0.00  | 0.00  | 0.00  | -0.01 | -0.01 | 0.01  |
| 29 | 6 | 0.00  | 0.00  | 0.00  | 0.00  | 0.00  | 0.00  | 0.00  | 0.00  | 0.00  |
| 30 | 1 | 0.00  | 0.00  | 0.00  | 0.00  | 0.00  | 0.00  | 0.00  | 0.00  | 0.00  |
| 31 | 1 | 0.00  | 0.00  | 0.00  | 0.00  | 0.00  | 0.00  | 0.00  | 0.00  | 0.00  |
| 32 | 6 | 0.00  | 0.00  | 0.00  | 0.02  | 0.01  | -0.02 | 0.00  | 0.00  | 0.00  |
| 33 | 1 | 0.00  | 0.00  | 0.00  | -0.16 | -0.04 | 0.18  | 0.00  | 0.00  | 0.00  |
| 34 | 6 | 0.00  | 0.00  | 0.00  | 0.00  | -0.06 | -0.06 | 0.00  | 0.00  | 0.00  |
| 35 | 1 | 0.00  | 0.00  | 0.00  | -0.01 | 0.63  | 0.73  | 0.00  | 0.00  | 0.00  |
| 36 | 6 | -0.05 | -0.07 | 0.02  | 0.00  | 0.00  | 0.00  | 0.00  | 0.00  | 0.00  |
| 37 | 1 | -0.07 | 0.15  | 0.10  | 0.00  | 0.00  | 0.00  | 0.00  | 0.00  | 0.00  |
| 38 | 1 | 0.42  | 0.74  | -0.36 | 0.00  | 0.00  | 0.00  | -0.01 | -0.01 | 0.01  |
| 39 | 1 | 0.31  | -0.05 | 0.03  | 0.00  | 0.00  | 0.00  | 0.00  | 0.00  | 0.00  |
| 40 | 6 | 0.00  | 0.00  | 0.00  | 0.00  | 0.00  | 0.00  | 0.02  | -0.06 | -0.06 |
| 41 | 1 | 0.00  | 0.01  | 0.01  | 0.00  | 0.00  | 0.00  | -0.25 | 0.70  | 0.66  |
| 42 | 6 | 0.00  | 0.00  | 0.00  | 0.00  | 0.00  | 0.00  | 0.00  | 0.00  | 0.00  |
| 43 | 1 | 0.00  | 0.00  | 0.00  | 0.00  | 0.00  | 0.00  | 0.00  | 0.00  | 0.00  |
| 44 | 1 | 0.00  | 0.00  | 0.00  | 0.00  | 0.00  | 0.00  | 0.00  | 0.01  | 0.00  |
| 45 | 1 | 0.00  | 0.00  | 0.00  | 0.00  | 0.00  | 0.00  | -0.01 | 0.00  | 0.00  |
| 46 | 6 | 0.00  | 0.00  | 0.00  | 0.00  | 0.00  | 0.00  | 0.00  | 0.00  | 0.00  |
| 47 | 1 | 0.01  | 0.02  | 0.01  | 0.00  | 0.00  | 0.00  | 0.00  | 0.00  | 0.00  |
| 48 | 6 | 0.00  | 0.00  | 0.00  | 0.00  | 0.00  | 0.00  | 0.00  | 0.00  | 0.00  |
| 49 | 1 | 0.00  | 0.00  | 0.00  | 0.00  | 0.00  | 0.00  | 0.00  | 0.00  | 0.00  |
| 50 | 1 | 0.00  | 0.00  | 0.00  | 0.00  | 0.00  | 0.00  | 0.00  | 0.00  | 0.00  |
| 51 | 6 | 0.00  | 0.00  | 0.00  | 0.00  | 0.00  | 0.00  | 0.00  | 0.00  | 0.00  |
| 52 | 1 | 0.00  | 0.00  | 0.00  | 0.00  | 0.00  | 0.00  | 0.00  | 0.00  | 0.00  |
| 53 | 6 | 0.00  | 0.00  | 0.00  | 0.00  | 0.00  | 0.00  | 0.00  | 0.00  | 0.00  |
| 54 | 1 | 0.00  | 0.00  | 0.00  | 0.00  | 0.00  | 0.00  | 0.00  | 0.00  | 0.00  |
| 55 | 6 | 0.00  | 0.00  | 0.00  | 0.00  | 0.00  | 0.00  | 0.00  | 0.00  | 0.00  |
| 56 | 1 | 0.00  | 0.00  | 0.00  | 0.00  | 0.00  | 0.00  | 0.00  | 0.00  | 0.00  |
| 57 | 6 | 0.00  | 0.00  | 0.00  | 0.00  | 0.00  | 0.00  | 0.00  | 0.00  | 0.00  |
| 58 | 1 | 0.00  | 0.00  | 0.00  | 0.00  | 0.00  | 0.00  | 0.00  | 0.00  | 0.00  |
| 59 | 8 | 0.00  | 0.00  | 0.00  | 0.00  | 0.00  | 0.00  | 0.00  | 0.00  | 0.00  |
| 60 | 8 | 0.00  | 0.00  | 0.00  | 0.00  | 0.00  | 0.00  | 0.00  | 0.00  | 0.00  |
| 61 | 8 | 0.00  | 0.00  | 0.00  | 0.00  | 0.00  | 0.00  | 0.00  | 0.00  | 0.00  |
| 62 | 6 | 0.00  | 0.00  | 0.00  | 0.00  | 0.00  | 0.00  | 0.00  | 0.00  | 0.00  |
| 63 | 6 | 0.00  | 0.00  | 0.00  | 0.00  | 0.00  | 0.00  | 0.00  | 0.00  | 0.00  |
| 64 | 6 | 0.00  | 0.00  | 0.00  | 0.00  | 0.00  | 0.00  | 0.00  | 0.00  | 0.00  |
| 65 | 8 | 0.00  | 0.00  | 0.00  | 0.00  | 0.00  | 0.00  | 0.00  | 0.00  | 0.00  |
| 66 | 1 | 0.00  | 0.00  | 0.00  | 0.00  | 0.00  | 0.00  | 0.00  | 0.00  | 0.00  |
| 67 | 6 | 0.00  | 0.00  | 0.00  | 0.00  | 0.00  | 0.00  | 0.00  | 0.00  | 0.00  |
| 68 | 1 | 0.00  | 0.00  | 0.00  | 0.00  | 0.00  | 0.00  | 0.00  | 0.00  | 0.00  |
| 69 | 1 | 0.00  | 0.00  | 0.00  | 0.00  | 0.00  | 0.00  | 0.00  | 0.00  | 0.00  |
| 70 | 1 | 0.00  | 0.00  | 0.00  | 0.00  | 0.00  | 0.00  | 0.00  | 0.00  | 0.00  |
| 71 | 6 | 0.00  | 0.00  | 0.00  | 0.00  | 0.00  | 0.00  | 0.00  | 0.00  | 0.00  |
| 72 | 1 | 0.00  | 0.00  | 0.00  | 0.00  | 0.00  | 0.00  | 0.00  | 0.00  | 0.00  |
| 73 | 1 | 0.00  | 0.00  | 0.00  | 0.00  | 0.00  | 0.00  | 0.00  | 0.00  | 0.00  |
| 74 | 1 | 0.00  | 0.00  | 0.00  | 0.00  | 0.00  | 0.00  | 0.00  | 0.00  | 0.00  |

214

A

215

A

216

A

[illegible]

|    |   |       |       |       |       |       |       |       |       |       |
|----|---|-------|-------|-------|-------|-------|-------|-------|-------|-------|
| 45 | 1 | 0.00  | 0.00  | 0.00  | 0.00  | 0.00  | 0.00  | 0.00  | 0.00  | 0.00  |
| 46 | 6 | 0.00  | 0.00  | 0.00  | 0.00  | 0.00  | 0.00  | 0.00  | 0.00  | 0.00  |
| 47 | 1 | 0.00  | 0.00  | 0.00  | 0.00  | 0.00  | 0.00  | 0.00  | 0.00  | 0.00  |
| 48 | 6 | 0.00  | 0.00  | 0.00  | 0.00  | 0.00  | 0.00  | 0.00  | 0.00  | 0.00  |
| 49 | 1 | 0.00  | 0.00  | 0.00  | 0.00  | 0.00  | 0.00  | 0.00  | 0.00  | 0.00  |
| 50 | 1 | 0.00  | 0.00  | 0.00  | 0.00  | 0.01  | -0.01 | 0.00  | 0.01  | -0.01 |
| 51 | 6 | 0.00  | 0.00  | 0.00  | 0.00  | 0.00  | 0.00  | 0.00  | 0.00  | 0.00  |
| 52 | 1 | 0.00  | 0.00  | -0.01 | 0.00  | 0.00  | 0.00  | 0.00  | 0.00  | 0.00  |
| 53 | 6 | 0.01  | -0.08 | 0.03  | 0.01  | -0.02 | 0.01  | 0.00  | 0.02  | -0.01 |
| 54 | 1 | -0.09 | 0.90  | -0.28 | -0.02 | 0.21  | -0.07 | 0.02  | -0.21 | 0.07  |
| 55 | 6 | 0.02  | 0.01  | 0.01  | -0.04 | -0.02 | -0.04 | 0.04  | 0.03  | 0.04  |
| 56 | 1 | -0.22 | -0.14 | -0.19 | 0.45  | 0.28  | 0.39  | -0.46 | -0.29 | -0.40 |
| 57 | 6 | 0.00  | 0.00  | 0.00  | -0.01 | -0.06 | 0.00  | -0.01 | -0.06 | 0.00  |
| 58 | 1 | 0.00  | 0.00  | 0.00  | 0.14  | 0.70  | 0.02  | 0.14  | 0.69  | 0.02  |
| 59 | 8 | 0.00  | 0.00  | 0.00  | 0.00  | 0.00  | 0.00  | 0.00  | 0.00  | 0.00  |
| 60 | 8 | 0.00  | 0.00  | 0.00  | 0.00  | 0.00  | 0.00  | 0.00  | 0.00  | 0.00  |
| 61 | 8 | 0.00  | 0.00  | 0.00  | 0.00  | 0.00  | 0.00  | 0.00  | 0.00  | 0.00  |
| 62 | 6 | 0.00  | 0.00  | 0.00  | 0.00  | 0.00  | 0.00  | 0.00  | 0.00  | 0.00  |
| 63 | 6 | 0.00  | 0.00  | 0.00  | 0.00  | 0.00  | 0.00  | 0.00  | 0.00  | 0.00  |
| 64 | 6 | 0.00  | 0.00  | 0.00  | 0.00  | 0.00  | 0.00  | 0.00  | 0.00  | 0.00  |
| 65 | 8 | 0.00  | 0.00  | 0.00  | 0.00  | 0.00  | 0.00  | 0.00  | 0.00  | 0.00  |
| 66 | 1 | 0.00  | 0.00  | 0.00  | 0.00  | 0.00  | 0.00  | 0.00  | 0.00  | 0.00  |
| 67 | 6 | 0.00  | 0.00  | 0.00  | 0.00  | 0.00  | 0.00  | 0.00  | 0.00  | 0.00  |
| 68 | 1 | 0.00  | 0.00  | 0.00  | 0.00  | 0.00  | 0.00  | 0.00  | 0.00  | 0.00  |
| 69 | 1 | 0.00  | 0.00  | 0.00  | 0.00  | 0.00  | 0.00  | 0.00  | 0.00  | 0.00  |
| 70 | 1 | 0.00  | 0.00  | 0.00  | 0.00  | 0.00  | 0.00  | 0.00  | 0.00  | 0.00  |
| 71 | 6 | 0.00  | 0.00  | 0.00  | 0.00  | 0.00  | 0.00  | 0.00  | 0.00  | 0.00  |
| 72 | 1 | 0.00  | 0.00  | 0.00  | 0.00  | 0.00  | 0.00  | 0.00  | 0.00  | 0.00  |
| 73 | 1 | 0.00  | 0.00  | 0.00  | 0.00  | 0.00  | 0.00  | 0.00  | 0.00  | 0.00  |
| 74 | 1 | 0.00  | 0.00  | 0.00  | 0.00  | 0.00  | 0.00  | 0.00  | 0.00  | 0.00  |

## 2. freq=raman b3lyp/6-311g(d,p) scrf=(cpcm,solvent=chloroform) nosymm geom=connectivity

Harmonic frequencies (cm<sup>-1</sup>), IR intensities (KM/Mole), Raman scattering activities (A<sup>4</sup>/AMU), depolarization ratios for plane and unpolarized incident light, reduced masses (AMU), force constants (mDyne/A), and normal coordinates:

|                |    | 1       |       | 2       |      | 3       |       |
|----------------|----|---------|-------|---------|------|---------|-------|
|                |    | A       |       | A       |      | A       |       |
| Frequencies -- |    | 16.0663 |       | 21.0806 |      | 30.8434 |       |
| Red. masses -- |    | 3.2917  |       | 5.1370  |      | 5.4383  |       |
| Frc consts --  |    | 0.0005  |       | 0.0013  |      | 0.0030  |       |
| IR Inten --    |    | 0.9470  |       | 0.6208  |      | 0.7190  |       |
| Raman Activ -- |    | 4.6775  |       | 1.2735  |      | 2.6964  |       |
| Depolar (P) -- |    | 0.7350  |       | 0.7110  |      | 0.7494  |       |
| Depolar (U) -- |    | 0.8473  |       | 0.8311  |      | 0.8567  |       |
| Atom           | AN | X       | Y     | Z       | X    | Y       | Z     |
| 1              | 6  | 0.01    | 0.00  | 0.00    | 0.00 | -0.01   | -0.02 |
| 2              | 6  | 0.01    | -0.01 | 0.01    | 0.02 | 0.03    | -0.04 |

|    |   |       |       |       |       |       |       |       |       |       |
|----|---|-------|-------|-------|-------|-------|-------|-------|-------|-------|
| 3  | 6 | 0.00  | 0.02  | -0.01 | 0.00  | 0.00  | -0.04 | 0.02  | -0.02 | 0.03  |
| 4  | 6 | 0.01  | 0.03  | -0.03 | 0.00  | -0.02 | -0.01 | 0.02  | -0.01 | 0.02  |
| 5  | 6 | 0.01  | 0.02  | -0.02 | 0.00  | -0.01 | 0.00  | 0.02  | -0.03 | 0.03  |
| 6  | 6 | 0.00  | 0.01  | -0.01 | -0.01 | 0.02  | -0.01 | 0.02  | -0.02 | 0.02  |
| 7  | 8 | 0.00  | -0.01 | 0.02  | -0.02 | 0.05  | -0.11 | 0.04  | -0.05 | 0.10  |
| 8  | 6 | 0.02  | -0.02 | 0.00  | 0.07  | 0.00  | 0.10  | -0.02 | -0.02 | -0.04 |
| 9  | 6 | 0.01  | 0.01  | -0.03 | 0.01  | -0.01 | 0.04  | 0.01  | -0.01 | -0.03 |
| 10 | 1 | 0.00  | 0.02  | -0.02 | -0.02 | -0.02 | 0.06  | 0.03  | 0.02  | -0.04 |
| 11 | 8 | 0.02  | 0.00  | -0.04 | 0.03  | 0.00  | 0.08  | -0.02 | -0.01 | -0.06 |
| 12 | 6 | 0.01  | 0.01  | -0.05 | 0.00  | -0.02 | 0.00  | 0.01  | -0.01 | -0.01 |
| 13 | 1 | 0.00  | 0.04  | -0.07 | -0.03 | 0.00  | -0.02 | 0.01  | 0.00  | -0.02 |
| 14 | 6 | -0.01 | 0.00  | 0.02  | -0.03 | 0.03  | 0.05  | 0.05  | 0.07  | -0.02 |
| 15 | 8 | -0.04 | -0.02 | 0.04  | -0.08 | 0.07  | 0.11  | 0.11  | 0.19  | -0.01 |
| 16 | 6 | 0.01  | -0.01 | 0.01  | 0.03  | -0.01 | 0.15  | 0.00  | 0.01  | -0.07 |
| 17 | 1 | 0.02  | -0.02 | 0.01  | 0.06  | 0.00  | 0.20  | -0.01 | -0.01 | -0.10 |
| 18 | 1 | 0.01  | 0.01  | 0.00  | -0.01 | -0.02 | 0.17  | 0.02  | 0.03  | -0.09 |
| 19 | 1 | 0.01  | 0.00  | 0.03  | 0.02  | -0.02 | 0.14  | 0.01  | 0.01  | -0.05 |
| 20 | 6 | 0.02  | -0.01 | -0.01 | 0.04  | 0.00  | 0.03  | 0.00  | -0.02 | -0.01 |
| 21 | 1 | 0.02  | -0.01 | -0.02 | 0.08  | 0.02  | 0.00  | -0.02 | -0.04 | 0.01  |
| 22 | 6 | 0.00  | 0.01  | 0.01  | -0.03 | -0.05 | -0.02 | 0.04  | 0.02  | 0.04  |
| 23 | 1 | 0.00  | 0.00  | 0.02  | -0.03 | -0.07 | -0.02 | 0.04  | 0.03  | 0.04  |
| 24 | 1 | 0.00  | 0.02  | 0.00  | -0.02 | -0.08 | 0.00  | 0.04  | 0.04  | 0.02  |
| 25 | 1 | -0.01 | 0.02  | 0.02  | -0.05 | -0.05 | -0.05 | 0.05  | 0.02  | 0.06  |
| 26 | 6 | 0.00  | 0.01  | -0.01 | -0.01 | 0.02  | -0.07 | 0.02  | -0.02 | 0.04  |
| 27 | 1 | 0.01  | 0.01  | -0.01 | 0.00  | 0.05  | -0.09 | 0.02  | -0.03 | 0.04  |
| 28 | 1 | 0.00  | 0.01  | -0.01 | -0.01 | -0.02 | -0.09 | 0.02  | -0.01 | 0.04  |
| 29 | 6 | 0.03  | -0.02 | -0.03 | 0.10  | 0.01  | 0.11  | -0.04 | -0.03 | -0.07 |
| 30 | 1 | 0.03  | -0.03 | -0.03 | 0.15  | 0.02  | 0.07  | -0.07 | -0.05 | -0.05 |
| 31 | 1 | 0.03  | -0.03 | -0.03 | 0.11  | 0.00  | 0.17  | -0.05 | -0.02 | -0.10 |
| 32 | 6 | 0.03  | -0.04 | 0.01  | 0.13  | 0.02  | 0.08  | -0.04 | -0.04 | -0.03 |
| 33 | 1 | 0.03  | -0.05 | 0.01  | 0.18  | 0.02  | 0.13  | -0.07 | -0.05 | -0.05 |
| 34 | 6 | 0.02  | -0.03 | 0.02  | 0.10  | 0.03  | 0.02  | -0.02 | -0.05 | 0.02  |
| 35 | 1 | 0.02  | -0.04 | 0.03  | 0.14  | 0.04  | 0.01  | -0.03 | -0.07 | 0.03  |
| 36 | 6 | 0.02  | 0.05  | -0.03 | 0.00  | -0.04 | -0.02 | 0.04  | 0.01  | 0.02  |
| 37 | 1 | 0.02  | 0.06  | -0.04 | 0.02  | -0.04 | 0.00  | 0.02  | 0.01  | 0.01  |
| 38 | 1 | 0.02  | 0.06  | -0.01 | -0.01 | -0.04 | -0.03 | 0.06  | 0.01  | 0.03  |
| 39 | 1 | 0.02  | 0.05  | -0.03 | 0.00  | -0.06 | -0.02 | 0.04  | 0.04  | 0.01  |
| 40 | 6 | 0.00  | 0.01  | 0.00  | -0.01 | 0.02  | -0.07 | 0.02  | -0.02 | 0.04  |
| 41 | 1 | 0.00  | 0.00  | 0.01  | 0.00  | 0.03  | -0.08 | 0.02  | -0.03 | 0.05  |
| 42 | 6 | -0.02 | 0.02  | -0.01 | -0.04 | 0.07  | 0.00  | 0.03  | -0.04 | 0.01  |
| 43 | 1 | -0.03 | 0.02  | 0.00  | -0.06 | 0.10  | 0.00  | 0.03  | -0.05 | 0.02  |
| 44 | 1 | -0.01 | 0.02  | -0.01 | -0.03 | 0.07  | 0.04  | 0.03  | -0.04 | -0.01 |
| 45 | 1 | -0.02 | 0.01  | -0.02 | -0.05 | 0.06  | -0.03 | 0.03  | -0.04 | 0.02  |
| 46 | 6 | 0.01  | 0.02  | -0.01 | 0.00  | -0.03 | 0.04  | 0.02  | -0.05 | 0.06  |
| 47 | 1 | 0.01  | 0.03  | -0.02 | 0.01  | -0.05 | 0.05  | 0.02  | -0.06 | 0.08  |
| 48 | 6 | 0.00  | 0.01  | 0.00  | -0.01 | -0.02 | 0.06  | 0.02  | -0.03 | 0.06  |
| 49 | 1 | 0.01  | 0.01  | 0.01  | 0.00  | -0.04 | 0.08  | 0.02  | -0.06 | 0.07  |
| 50 | 1 | -0.02 | 0.01  | 0.00  | -0.02 | 0.00  | 0.08  | 0.02  | -0.01 | 0.09  |
| 51 | 6 | 0.00  | 0.01  | 0.01  | -0.01 | 0.00  | 0.03  | 0.02  | -0.01 | 0.01  |
| 52 | 1 | 0.01  | 0.01  | 0.01  | 0.01  | -0.02 | 0.01  | -0.01 | -0.03 | -0.03 |
| 53 | 6 | -0.01 | -0.01 | 0.03  | -0.02 | 0.04  | 0.01  | 0.08  | 0.11  | -0.14 |
| 54 | 1 | 0.00  | -0.01 | 0.03  | 0.00  | 0.03  | -0.04 | 0.08  | 0.08  | -0.22 |

|    |   |       |       |       |       |       |       |       |       |       |
|----|---|-------|-------|-------|-------|-------|-------|-------|-------|-------|
| 55 | 6 | -0.03 | -0.02 | 0.04  | -0.05 | 0.07  | 0.05  | 0.11  | 0.18  | -0.13 |
| 56 | 1 | -0.03 | -0.02 | 0.05  | -0.06 | 0.09  | 0.05  | 0.14  | 0.23  | -0.20 |
| 57 | 6 | -0.03 | -0.01 | 0.03  | -0.07 | 0.05  | 0.11  | 0.07  | 0.12  | 0.05  |
| 58 | 1 | -0.04 | 0.00  | 0.02  | -0.08 | 0.05  | 0.15  | 0.06  | 0.12  | 0.15  |
| 59 | 8 | 0.00  | 0.03  | 0.00  | -0.02 | -0.01 | -0.07 | 0.03  | -0.01 | 0.04  |
| 60 | 8 | 0.03  | -0.01 | -0.07 | 0.03  | -0.04 | -0.03 | -0.01 | -0.03 | -0.01 |
| 61 | 8 | 0.02  | 0.02  | -0.01 | 0.01  | -0.05 | 0.00  | 0.02  | -0.07 | 0.02  |
| 62 | 6 | 0.02  | 0.00  | -0.05 | 0.04  | -0.06 | -0.05 | -0.05 | -0.02 | -0.01 |
| 63 | 6 | -0.04 | -0.01 | -0.01 | -0.03 | -0.03 | -0.09 | -0.11 | -0.02 | -0.01 |
| 64 | 6 | 0.06  | -0.04 | 0.14  | -0.07 | 0.01  | -0.10 | -0.14 | 0.02  | 0.00  |
| 65 | 8 | 0.06  | 0.03  | -0.04 | 0.11  | -0.10 | -0.04 | -0.05 | -0.02 | -0.01 |
| 66 | 1 | 0.18  | -0.05 | 0.23  | -0.05 | 0.01  | -0.09 | -0.12 | 0.04  | 0.01  |
| 67 | 6 | 0.01  | -0.07 | 0.22  | -0.15 | 0.04  | -0.15 | -0.21 | 0.03  | 0.00  |
| 68 | 1 | -0.13 | -0.06 | 0.11  | -0.17 | 0.03  | -0.16 | -0.23 | 0.00  | -0.01 |
| 69 | 1 | -0.05 | -0.14 | 0.42  | -0.16 | 0.11  | -0.14 | -0.22 | 0.09  | 0.00  |
| 70 | 1 | 0.20  | -0.05 | 0.22  | -0.19 | 0.01  | -0.17 | -0.25 | 0.03  | 0.00  |
| 71 | 6 | -0.21 | 0.00  | -0.15 | -0.06 | -0.04 | -0.11 | -0.14 | -0.05 | -0.03 |
| 72 | 1 | -0.18 | -0.02 | -0.27 | -0.01 | -0.10 | -0.09 | -0.10 | -0.10 | -0.03 |
| 73 | 1 | -0.35 | 0.03  | -0.08 | -0.05 | 0.03  | -0.09 | -0.14 | -0.02 | -0.02 |
| 74 | 1 | -0.23 | -0.01 | -0.23 | -0.12 | -0.06 | -0.16 | -0.19 | -0.07 | -0.05 |

|      |                |         |       |       |  |         |       |       |  |         |       |       |
|------|----------------|---------|-------|-------|--|---------|-------|-------|--|---------|-------|-------|
|      |                | 4       |       |       |  | 5       |       |       |  | 6       |       |       |
|      |                | A       |       |       |  | A       |       |       |  | A       |       |       |
|      | Frequencies -- | 39.5275 |       |       |  | 48.9855 |       |       |  | 52.4361 |       |       |
|      | Red. masses -- | 4.2646  |       |       |  | 4.5812  |       |       |  | 4.7643  |       |       |
|      | Frc consts --  | 0.0039  |       |       |  | 0.0065  |       |       |  | 0.0077  |       |       |
|      | IR Inten --    | 0.5007  |       |       |  | 0.1154  |       |       |  | 2.0205  |       |       |
|      | Raman Activ -- | 4.2131  |       |       |  | 1.6099  |       |       |  | 3.1545  |       |       |
|      | Depolar (P) -- | 0.7500  |       |       |  | 0.7169  |       |       |  | 0.7218  |       |       |
|      | Depolar (U) -- | 0.8571  |       |       |  | 0.8351  |       |       |  | 0.8384  |       |       |
| Atom | AN             | X       | Y     | Z     |  | X       | Y     | Z     |  | X       | Y     | Z     |
| 1    | 6              | -0.01   | -0.01 | -0.02 |  | 0.03    | -0.01 | 0.03  |  | -0.02   | -0.02 | 0.00  |
| 2    | 6              | -0.03   | 0.02  | -0.05 |  | 0.06    | -0.06 | 0.09  |  | -0.05   | -0.02 | 0.00  |
| 3    | 6              | 0.00    | -0.01 | 0.00  |  | 0.01    | 0.00  | -0.03 |  | -0.01   | 0.00  | 0.01  |
| 4    | 6              | 0.01    | -0.01 | 0.02  |  | 0.01    | 0.00  | -0.04 |  | 0.01    | 0.01  | 0.00  |
| 5    | 6              | 0.01    | 0.01  | 0.02  |  | 0.00    | -0.01 | -0.04 |  | 0.01    | 0.04  | -0.01 |
| 6    | 6              | 0.01    | 0.00  | 0.03  |  | 0.01    | 0.03  | -0.06 |  | 0.01    | 0.04  | -0.01 |
| 7    | 8              | -0.05   | 0.03  | -0.08 |  | 0.10    | -0.08 | 0.14  |  | -0.04   | -0.03 | 0.02  |
| 8    | 6              | 0.00    | 0.00  | 0.00  |  | 0.02    | -0.03 | -0.01 |  | -0.01   | -0.06 | -0.03 |
| 9    | 6              | 0.01    | -0.01 | 0.02  |  | 0.01    | 0.00  | -0.04 |  | 0.04    | -0.04 | 0.01  |
| 10   | 1              | 0.00    | -0.03 | 0.02  |  | 0.02    | 0.02  | -0.03 |  | 0.03    | -0.06 | 0.01  |
| 11   | 8              | 0.01    | -0.01 | 0.03  |  | 0.01    | -0.02 | -0.06 |  | 0.07    | -0.05 | 0.03  |
| 12   | 6              | 0.01    | -0.01 | 0.02  |  | 0.01    | 0.00  | -0.03 |  | 0.05    | 0.00  | 0.01  |
| 13   | 1              | 0.01    | -0.01 | 0.01  |  | 0.02    | -0.01 | -0.03 |  | 0.07    | -0.01 | 0.02  |
| 14   | 6              | 0.02    | 0.02  | 0.01  |  | -0.03   | 0.01  | 0.00  |  | 0.01    | -0.01 | -0.01 |
| 15   | 8              | 0.17    | -0.02 | -0.14 |  | -0.03   | 0.01  | 0.01  |  | -0.06   | -0.10 | 0.02  |
| 16   | 6              | 0.00    | -0.02 | 0.00  |  | 0.02    | 0.00  | 0.01  |  | 0.00    | -0.12 | -0.07 |
| 17   | 1              | 0.00    | -0.01 | 0.00  |  | 0.02    | -0.04 | 0.00  |  | -0.01   | -0.13 | -0.09 |
| 18   | 1              | 0.00    | -0.04 | 0.01  |  | 0.02    | 0.04  | -0.03 |  | 0.04    | -0.15 | -0.05 |
| 19   | 1              | 0.00    | -0.03 | -0.03 |  | 0.01    | 0.02  | 0.06  |  | -0.02   | -0.13 | -0.11 |
| 20   | 6              | 0.00    | 0.00  | 0.00  |  | 0.02    | -0.02 | -0.01 |  | 0.00    | -0.03 | 0.00  |
| 21   | 1              | 0.00    | 0.02  | 0.00  |  | 0.02    | -0.05 | -0.01 |  | -0.01   | -0.01 | 0.02  |
| 22   | 6              | 0.00    | -0.04 | -0.05 |  | 0.00    | 0.05  | 0.08  |  | -0.02   | -0.04 | 0.00  |

|    |   |       |       |       |       |       |       |       |       |       |
|----|---|-------|-------|-------|-------|-------|-------|-------|-------|-------|
| 23 | 1 | 0.00  | -0.03 | -0.07 | 0.00  | 0.02  | 0.12  | -0.03 | -0.05 | 0.00  |
| 24 | 1 | 0.01  | -0.06 | -0.03 | -0.01 | 0.08  | 0.05  | -0.02 | -0.04 | 0.00  |
| 25 | 1 | 0.00  | -0.05 | -0.06 | -0.02 | 0.07  | 0.11  | -0.03 | -0.03 | -0.01 |
| 26 | 6 | -0.01 | 0.00  | 0.06  | 0.02  | 0.03  | -0.14 | -0.01 | 0.04  | -0.01 |
| 27 | 1 | -0.04 | -0.02 | 0.08  | 0.06  | 0.07  | -0.18 | 0.00  | 0.05  | -0.01 |
| 28 | 1 | 0.01  | 0.02  | 0.08  | -0.01 | -0.02 | -0.18 | -0.02 | 0.04  | -0.01 |
| 29 | 6 | 0.01  | 0.01  | 0.03  | 0.01  | -0.04 | -0.05 | 0.02  | -0.05 | 0.00  |
| 30 | 1 | 0.02  | 0.03  | 0.03  | 0.00  | -0.07 | -0.05 | 0.01  | -0.01 | 0.02  |
| 31 | 1 | 0.02  | 0.00  | 0.04  | 0.00  | -0.04 | -0.07 | 0.03  | -0.07 | -0.01 |
| 32 | 6 | -0.01 | 0.02  | -0.02 | 0.03  | -0.08 | 0.03  | -0.08 | -0.03 | -0.05 |
| 33 | 1 | 0.00  | 0.03  | -0.01 | 0.03  | -0.09 | 0.02  | -0.11 | -0.03 | -0.08 |
| 34 | 6 | -0.02 | 0.03  | -0.04 | 0.06  | -0.09 | 0.07  | -0.10 | -0.02 | -0.04 |
| 35 | 1 | -0.03 | 0.05  | -0.06 | 0.07  | -0.12 | 0.10  | -0.14 | 0.00  | -0.05 |
| 36 | 6 | 0.01  | -0.02 | 0.01  | 0.00  | 0.01  | -0.03 | 0.00  | 0.00  | 0.00  |
| 37 | 1 | 0.04  | -0.01 | 0.02  | -0.05 | -0.01 | -0.03 | 0.01  | 0.01  | 0.00  |
| 38 | 1 | -0.01 | -0.01 | 0.01  | 0.03  | -0.01 | -0.04 | -0.03 | 0.01  | 0.00  |
| 39 | 1 | 0.01  | -0.05 | 0.01  | 0.00  | 0.06  | -0.02 | -0.01 | -0.02 | 0.01  |
| 40 | 6 | -0.01 | -0.01 | 0.03  | 0.02  | 0.02  | -0.09 | -0.02 | 0.02  | 0.01  |
| 41 | 1 | -0.03 | -0.01 | 0.02  | 0.04  | 0.02  | -0.08 | -0.02 | 0.01  | 0.01  |
| 42 | 6 | 0.02  | -0.04 | 0.02  | -0.01 | 0.09  | -0.04 | 0.03  | 0.04  | 0.00  |
| 43 | 1 | 0.02  | -0.05 | 0.02  | -0.02 | 0.13  | -0.05 | 0.03  | 0.06  | -0.01 |
| 44 | 1 | 0.02  | -0.04 | -0.01 | -0.01 | 0.09  | 0.01  | 0.04  | 0.04  | 0.01  |
| 45 | 1 | 0.02  | -0.04 | 0.04  | -0.01 | 0.10  | -0.07 | 0.03  | 0.04  | 0.00  |
| 46 | 6 | 0.02  | 0.02  | 0.01  | -0.01 | -0.04 | 0.00  | 0.02  | 0.06  | -0.04 |
| 47 | 1 | 0.03  | 0.02  | 0.00  | -0.02 | -0.06 | 0.03  | 0.02  | 0.07  | -0.05 |
| 48 | 6 | 0.03  | 0.03  | 0.00  | -0.01 | -0.03 | 0.01  | 0.02  | 0.06  | -0.06 |
| 49 | 1 | 0.03  | 0.05  | 0.00  | -0.01 | -0.06 | 0.02  | 0.03  | 0.09  | -0.07 |
| 50 | 1 | 0.04  | 0.02  | 0.00  | -0.02 | 0.00  | 0.04  | 0.04  | 0.04  | -0.08 |
| 51 | 6 | 0.01  | 0.02  | 0.02  | 0.00  | -0.01 | -0.03 | 0.02  | 0.04  | -0.02 |
| 52 | 1 | 0.00  | 0.04  | 0.02  | 0.03  | -0.04 | -0.05 | 0.03  | 0.07  | 0.01  |
| 53 | 6 | -0.14 | 0.04  | 0.19  | -0.15 | 0.03  | 0.12  | 0.10  | -0.06 | -0.03 |
| 54 | 1 | -0.31 | 0.07  | 0.37  | -0.23 | 0.04  | 0.19  | 0.19  | -0.06 | -0.05 |
| 55 | 6 | -0.05 | 0.01  | 0.09  | -0.15 | 0.03  | 0.12  | 0.05  | -0.11 | -0.01 |
| 56 | 1 | -0.11 | 0.01  | 0.15  | -0.23 | 0.05  | 0.19  | 0.09  | -0.16 | -0.01 |
| 57 | 6 | 0.20  | -0.02 | -0.19 | 0.04  | 0.00  | -0.06 | -0.09 | -0.04 | 0.02  |
| 58 | 1 | 0.37  | -0.04 | -0.37 | 0.14  | -0.02 | -0.16 | -0.18 | -0.02 | 0.05  |
| 59 | 8 | 0.01  | -0.01 | 0.02  | -0.04 | 0.01  | -0.06 | -0.03 | 0.02  | 0.01  |
| 60 | 8 | 0.01  | -0.02 | 0.01  | 0.02  | 0.02  | -0.03 | 0.07  | 0.03  | 0.01  |
| 61 | 8 | 0.01  | 0.03  | 0.02  | 0.00  | -0.06 | -0.05 | 0.00  | 0.08  | -0.01 |
| 62 | 6 | 0.01  | -0.02 | 0.01  | 0.00  | 0.04  | 0.01  | 0.10  | 0.03  | 0.04  |
| 63 | 6 | -0.05 | -0.01 | 0.00  | 0.00  | 0.02  | 0.04  | 0.00  | 0.04  | 0.05  |
| 64 | 6 | -0.06 | 0.01  | 0.01  | -0.06 | 0.07  | 0.01  | -0.08 | 0.12  | 0.04  |
| 65 | 8 | 0.04  | -0.03 | 0.01  | -0.03 | 0.09  | 0.00  | 0.18  | 0.04  | 0.05  |
| 66 | 1 | -0.02 | 0.02  | 0.04  | -0.10 | 0.12  | -0.04 | -0.06 | 0.17  | 0.04  |
| 67 | 6 | -0.12 | 0.03  | 0.00  | -0.07 | 0.06  | 0.03  | -0.21 | 0.16  | 0.01  |
| 68 | 1 | -0.15 | 0.03  | -0.02 | 0.00  | -0.01 | 0.11  | -0.20 | 0.09  | 0.04  |
| 69 | 1 | -0.13 | 0.07  | 0.04  | -0.04 | 0.12  | -0.08 | -0.20 | 0.30  | -0.04 |
| 70 | 1 | -0.11 | 0.02  | -0.02 | -0.20 | 0.08  | 0.07  | -0.35 | 0.14  | 0.01  |
| 71 | 6 | -0.09 | -0.02 | -0.04 | 0.07  | -0.04 | 0.11  | -0.01 | -0.03 | 0.04  |
| 72 | 1 | -0.09 | -0.02 | -0.08 | 0.10  | -0.09 | 0.17  | 0.00  | -0.04 | 0.00  |
| 73 | 1 | -0.13 | -0.03 | -0.03 | 0.15  | -0.02 | 0.08  | -0.02 | -0.07 | 0.04  |
| 74 | 1 | -0.09 | -0.02 | -0.05 | 0.02  | -0.06 | 0.14  | -0.04 | -0.04 | 0.09  |



|                |    |  | 7       |       |       | 8       |       |       | 9       |       |       |
|----------------|----|--|---------|-------|-------|---------|-------|-------|---------|-------|-------|
|                |    |  | A       |       |       | A       |       |       | A       |       |       |
| Frequencies -- |    |  | 66.8418 |       |       | 75.1357 |       |       | 88.1841 |       |       |
| Red. masses -- |    |  | 4.9960  |       |       | 4.7872  |       |       | 5.0838  |       |       |
| Frc consts --  |    |  | 0.0132  |       |       | 0.0159  |       |       | 0.0233  |       |       |
| IR Inten --    |    |  | 6.9880  |       |       | 0.1689  |       |       | 1.2415  |       |       |
| Raman Activ -- |    |  | 0.5355  |       |       | 2.0750  |       |       | 1.4563  |       |       |
| Depolar (P) -- |    |  | 0.7500  |       |       | 0.7486  |       |       | 0.5401  |       |       |
| Depolar (U) -- |    |  | 0.8571  |       |       | 0.8562  |       |       | 0.7014  |       |       |
| Atom           | AN |  | X       | Y     | Z     | X       | Y     | Z     | X       | Y     | Z     |
| 1              | 6  |  | 0.02    | 0.02  | 0.04  | -0.03   | 0.01  | -0.01 | 0.01    | -0.01 | 0.01  |
| 2              | 6  |  | 0.03    | 0.01  | 0.04  | -0.03   | 0.00  | 0.00  | 0.02    | -0.01 | 0.02  |
| 3              | 6  |  | 0.01    | 0.00  | 0.01  | -0.03   | 0.03  | -0.03 | 0.01    | 0.00  | -0.02 |
| 4              | 6  |  | -0.01   | -0.01 | 0.03  | -0.01   | 0.03  | -0.02 | 0.02    | -0.02 | 0.03  |
| 5              | 6  |  | -0.02   | -0.03 | 0.01  | -0.02   | 0.01  | 0.05  | 0.03    | 0.03  | 0.01  |
| 6              | 6  |  | 0.00    | 0.00  | -0.02 | -0.04   | 0.05  | 0.04  | 0.03    | 0.09  | -0.02 |
| 7              | 8  |  | 0.15    | -0.04 | 0.13  | -0.05   | 0.01  | 0.00  | 0.06    | -0.03 | 0.04  |
| 8              | 6  |  | -0.06   | 0.05  | -0.04 | -0.01   | -0.02 | 0.00  | 0.01    | -0.01 | 0.01  |
| 9              | 6  |  | 0.00    | 0.01  | 0.06  | -0.01   | 0.01  | -0.03 | 0.03    | -0.02 | 0.04  |
| 10             | 1  |  | 0.00    | -0.01 | 0.06  | -0.01   | 0.02  | -0.03 | 0.04    | -0.03 | 0.03  |
| 11             | 8  |  | 0.00    | 0.02  | 0.08  | 0.00    | 0.00  | -0.04 | 0.02    | -0.01 | 0.04  |
| 12             | 6  |  | -0.01   | 0.00  | 0.05  | -0.01   | 0.03  | -0.04 | 0.04    | -0.02 | 0.06  |
| 13             | 1  |  | -0.03   | -0.01 | 0.06  | -0.01   | 0.03  | -0.04 | 0.04    | -0.02 | 0.06  |
| 14             | 6  |  | -0.01   | -0.01 | -0.01 | -0.02   | -0.02 | 0.08  | 0.03    | 0.05  | 0.02  |
| 15             | 8  |  | -0.01   | 0.03  | 0.01  | 0.16    | -0.08 | -0.10 | 0.02    | -0.07 | -0.01 |
| 16             | 6  |  | -0.01   | -0.02 | -0.13 | -0.02   | -0.02 | 0.02  | 0.01    | -0.05 | -0.02 |
| 17             | 1  |  | -0.04   | 0.01  | -0.17 | -0.01   | -0.04 | 0.03  | 0.01    | -0.06 | -0.03 |
| 18             | 1  |  | 0.04    | -0.07 | -0.09 | -0.02   | 0.00  | 0.01  | 0.04    | -0.07 | -0.01 |
| 19             | 1  |  | -0.01   | -0.04 | -0.20 | -0.04   | -0.01 | 0.04  | -0.01   | -0.06 | -0.04 |
| 20             | 6  |  | -0.02   | 0.03  | 0.03  | -0.02   | 0.00  | -0.02 | 0.02    | -0.01 | 0.03  |
| 21             | 1  |  | -0.06   | 0.03  | 0.07  | -0.01   | 0.00  | -0.03 | 0.01    | 0.01  | 0.04  |
| 22             | 6  |  | 0.02    | 0.05  | 0.05  | -0.05   | 0.01  | 0.00  | -0.01   | -0.02 | 0.03  |
| 23             | 1  |  | 0.04    | 0.08  | 0.08  | -0.06   | -0.03 | 0.01  | -0.02   | -0.03 | 0.04  |
| 24             | 1  |  | -0.02   | 0.06  | 0.05  | -0.03   | 0.01  | -0.01 | -0.01   | -0.02 | 0.03  |
| 25             | 1  |  | 0.03    | 0.03  | 0.05  | -0.07   | 0.03  | 0.01  | -0.03   | -0.01 | 0.02  |
| 26             | 6  |  | 0.02    | 0.00  | -0.08 | -0.03   | 0.05  | -0.07 | 0.01    | 0.09  | -0.12 |
| 27             | 1  |  | 0.06    | 0.03  | -0.11 | 0.00    | 0.12  | -0.12 | 0.02    | 0.16  | -0.16 |
| 28             | 1  |  | 0.00    | -0.05 | -0.11 | -0.05   | -0.02 | -0.12 | -0.01   | 0.04  | -0.16 |
| 29             | 6  |  | -0.06   | 0.06  | 0.03  | 0.01    | -0.02 | -0.03 | 0.02    | 0.00  | 0.04  |
| 30             | 1  |  | -0.09   | 0.11  | 0.07  | 0.02    | -0.03 | -0.04 | 0.02    | 0.01  | 0.04  |
| 31             | 1  |  | -0.06   | 0.06  | 0.01  | 0.01    | -0.03 | -0.02 | 0.02    | -0.01 | 0.04  |
| 32             | 6  |  | -0.16   | 0.11  | -0.09 | 0.00    | -0.04 | 0.01  | -0.03   | 0.02  | -0.02 |
| 33             | 1  |  | -0.25   | 0.16  | -0.15 | 0.02    | -0.06 | 0.02  | -0.06   | 0.04  | -0.04 |
| 34             | 6  |  | -0.13   | 0.09  | -0.05 | -0.01   | -0.03 | 0.01  | -0.03   | 0.02  | -0.01 |
| 35             | 1  |  | -0.19   | 0.12  | -0.08 | 0.00    | -0.04 | 0.02  | -0.05   | 0.03  | -0.03 |
| 36             | 6  |  | -0.04   | -0.03 | 0.03  | 0.03    | 0.03  | -0.03 | 0.00    | -0.09 | 0.03  |
| 37             | 1  |  | -0.07   | -0.05 | 0.04  | 0.03    | 0.03  | -0.02 | -0.01   | -0.11 | 0.07  |
| 38             | 1  |  | -0.02   | -0.05 | 0.01  | 0.06    | 0.02  | -0.02 | -0.01   | -0.10 | -0.01 |
| 39             | 1  |  | -0.04   | 0.00  | 0.05  | 0.04    | 0.06  | -0.06 | 0.00    | -0.09 | 0.05  |
| 40             | 6  |  | 0.03    | 0.01  | -0.05 | -0.03   | 0.05  | -0.05 | 0.00    | 0.06  | -0.11 |
| 41             | 1  |  | 0.05    | 0.02  | -0.06 | -0.03   | 0.05  | -0.05 | 0.00    | 0.10  | -0.15 |
| 42             | 6  |  | 0.00    | 0.05  | 0.00  | -0.08   | 0.15  | 0.07  | 0.02    | 0.16  | -0.01 |

|    |   |       |       |       |       |       |       |       |       |       |
|----|---|-------|-------|-------|-------|-------|-------|-------|-------|-------|
| 43 | 1 | 0.00  | 0.08  | -0.01 | -0.10 | 0.21  | 0.06  | -0.01 | 0.21  | -0.01 |
| 44 | 1 | 0.00  | 0.05  | 0.05  | -0.09 | 0.16  | 0.16  | 0.04  | 0.16  | 0.05  |
| 45 | 1 | 0.00  | 0.07  | -0.01 | -0.09 | 0.18  | 0.03  | 0.00  | 0.15  | -0.05 |
| 46 | 6 | -0.04 | -0.06 | 0.03  | -0.04 | -0.05 | 0.13  | 0.06  | 0.06  | 0.00  |
| 47 | 1 | -0.05 | -0.06 | 0.05  | -0.05 | -0.07 | 0.16  | 0.08  | 0.04  | 0.01  |
| 48 | 6 | -0.03 | -0.06 | 0.03  | -0.08 | -0.06 | 0.19  | 0.07  | 0.10  | -0.02 |
| 49 | 1 | -0.04 | -0.09 | 0.04  | -0.07 | -0.15 | 0.25  | 0.08  | 0.13  | -0.02 |
| 50 | 1 | -0.05 | -0.03 | 0.06  | -0.15 | 0.00  | 0.25  | 0.10  | 0.08  | -0.03 |
| 51 | 6 | -0.01 | -0.04 | -0.01 | -0.05 | -0.02 | 0.11  | 0.05  | 0.09  | 0.00  |
| 52 | 1 | 0.00  | -0.07 | -0.03 | -0.02 | -0.09 | 0.07  | 0.07  | 0.11  | 0.02  |
| 53 | 6 | -0.06 | 0.01  | 0.01  | 0.07  | -0.05 | 0.02  | 0.09  | 0.00  | 0.05  |
| 54 | 1 | -0.09 | 0.01  | 0.02  | 0.05  | -0.04 | 0.05  | 0.14  | 0.01  | 0.08  |
| 55 | 6 | -0.06 | 0.03  | 0.02  | 0.17  | -0.08 | -0.09 | 0.08  | -0.07 | 0.02  |
| 56 | 1 | -0.08 | 0.05  | 0.03  | 0.26  | -0.11 | -0.17 | 0.11  | -0.12 | 0.03  |
| 57 | 6 | 0.02  | 0.00  | -0.01 | 0.04  | -0.05 | 0.00  | -0.01 | 0.00  | -0.02 |
| 58 | 1 | 0.05  | -0.01 | -0.02 | 0.03  | -0.04 | 0.00  | -0.05 | 0.01  | -0.05 |
| 59 | 8 | -0.01 | -0.02 | -0.03 | -0.06 | 0.04  | -0.04 | -0.05 | -0.03 | -0.10 |
| 60 | 8 | 0.00  | 0.01  | 0.05  | 0.01  | 0.03  | -0.05 | 0.00  | -0.06 | 0.07  |
| 61 | 8 | -0.03 | -0.07 | 0.00  | 0.02  | -0.09 | 0.06  | 0.01  | 0.05  | -0.01 |
| 62 | 6 | 0.10  | -0.04 | 0.01  | 0.03  | 0.02  | -0.04 | -0.13 | -0.05 | 0.03  |
| 63 | 6 | 0.05  | 0.00  | -0.05 | 0.03  | 0.02  | -0.03 | -0.09 | -0.03 | 0.00  |
| 64 | 6 | 0.09  | -0.03 | -0.02 | 0.03  | 0.02  | -0.02 | -0.05 | -0.08 | -0.02 |
| 65 | 8 | 0.20  | -0.11 | 0.02  | 0.05  | 0.03  | -0.04 | -0.25 | -0.05 | 0.01  |
| 66 | 1 | 0.15  | -0.08 | 0.04  | 0.03  | 0.03  | -0.02 | -0.06 | -0.13 | 0.00  |
| 67 | 6 | 0.06  | -0.01 | -0.06 | 0.03  | 0.01  | 0.01  | 0.01  | -0.08 | -0.05 |
| 68 | 1 | -0.06 | 0.07  | -0.16 | 0.03  | -0.01 | 0.01  | -0.04 | 0.02  | -0.12 |
| 69 | 1 | 0.01  | -0.03 | 0.09  | 0.03  | 0.01  | 0.00  | -0.02 | -0.16 | 0.04  |
| 70 | 1 | 0.20  | -0.05 | -0.12 | 0.02  | 0.02  | 0.02  | 0.15  | -0.10 | -0.10 |
| 71 | 6 | -0.03 | 0.04  | -0.12 | 0.04  | 0.00  | -0.02 | -0.11 | 0.02  | -0.02 |
| 72 | 1 | -0.01 | 0.01  | -0.14 | 0.11  | -0.11 | 0.07  | -0.20 | 0.16  | -0.11 |
| 73 | 1 | -0.09 | 0.11  | -0.08 | 0.10  | 0.15  | -0.01 | -0.19 | -0.14 | -0.02 |
| 74 | 1 | -0.06 | 0.04  | -0.20 | -0.08 | -0.03 | -0.10 | 0.05  | 0.07  | 0.05  |

|                |  |          |          |          |
|----------------|--|----------|----------|----------|
|                |  | 10       | 11       | 12       |
|                |  | A        | A        | A        |
| Frequencies -- |  | 103.0922 | 112.2049 | 119.4165 |
| Red. masses -- |  | 2.5671   | 1.4818   | 1.8529   |
| Frc consts --  |  | 0.0161   | 0.0110   | 0.0156   |
| IR Inten --    |  | 1.4295   | 1.0462   | 1.0834   |
| Raman Activ -- |  | 1.4600   | 1.2547   | 1.1137   |
| Depolar (P) -- |  | 0.6914   | 0.7241   | 0.7075   |
| Depolar (U) -- |  | 0.8175   | 0.8399   | 0.8287   |

| Atom | AN | X     | Y    | Z     | X     | Y     | Z     | X     | Y    | Z     |
|------|----|-------|------|-------|-------|-------|-------|-------|------|-------|
| 1    | 6  | 0.01  | 0.02 | 0.02  | 0.00  | 0.00  | 0.00  | 0.00  | 0.01 | 0.01  |
| 2    | 6  | -0.01 | 0.04 | 0.00  | 0.01  | 0.00  | 0.01  | 0.00  | 0.01 | 0.01  |
| 3    | 6  | 0.01  | 0.03 | 0.02  | 0.00  | -0.01 | -0.01 | 0.00  | 0.00 | 0.01  |
| 4    | 6  | 0.00  | 0.03 | -0.01 | 0.00  | -0.01 | 0.01  | 0.00  | 0.00 | 0.01  |
| 5    | 6  | 0.00  | 0.02 | -0.01 | 0.00  | 0.00  | 0.01  | 0.00  | 0.02 | 0.00  |
| 6    | 6  | 0.00  | 0.00 | -0.01 | 0.00  | 0.01  | 0.00  | 0.00  | 0.03 | 0.00  |
| 7    | 8  | 0.03  | 0.02 | 0.01  | 0.00  | 0.00  | 0.00  | -0.01 | 0.02 | 0.00  |
| 8    | 6  | 0.02  | 0.00 | 0.02  | -0.02 | 0.02  | -0.01 | -0.01 | 0.03 | -0.01 |
| 9    | 6  | 0.02  | 0.01 | 0.03  | -0.01 | 0.00  | 0.00  | 0.00  | 0.01 | 0.00  |
| 10   | 1  | -0.01 | 0.01 | 0.05  | 0.00  | 0.01  | -0.01 | 0.01  | 0.01 | 0.00  |

|    |   |       |       |       |       |       |       |       |       |       |
|----|---|-------|-------|-------|-------|-------|-------|-------|-------|-------|
| 11 | 8 | 0.06  | 0.00  | 0.06  | -0.03 | 0.01  | -0.02 | -0.02 | 0.01  | -0.01 |
| 12 | 6 | 0.01  | 0.02  | -0.03 | -0.01 | -0.01 | 0.01  | 0.00  | -0.01 | 0.00  |
| 13 | 1 | -0.02 | 0.05  | -0.07 | -0.01 | -0.01 | 0.02  | -0.01 | 0.00  | -0.01 |
| 14 | 6 | -0.01 | -0.01 | -0.01 | 0.00  | 0.02  | 0.01  | 0.01  | 0.03  | -0.01 |
| 15 | 8 | -0.01 | 0.01  | 0.00  | 0.00  | -0.01 | 0.00  | -0.01 | -0.02 | -0.01 |
| 16 | 6 | 0.02  | -0.11 | -0.02 | -0.01 | 0.08  | -0.01 | 0.01  | 0.08  | -0.02 |
| 17 | 1 | 0.02  | -0.06 | 0.00  | -0.01 | 0.05  | -0.03 | -0.01 | 0.05  | -0.05 |
| 18 | 1 | 0.04  | -0.20 | 0.05  | 0.00  | 0.13  | -0.05 | 0.02  | 0.13  | -0.06 |
| 19 | 1 | 0.01  | -0.14 | -0.12 | 0.01  | 0.10  | 0.05  | 0.02  | 0.10  | 0.04  |
| 20 | 6 | 0.03  | 0.01  | 0.03  | -0.01 | 0.00  | -0.01 | 0.00  | 0.01  | 0.00  |
| 21 | 1 | 0.03  | 0.03  | 0.03  | -0.02 | 0.00  | 0.00  | -0.01 | 0.00  | 0.01  |
| 22 | 6 | -0.01 | 0.00  | 0.01  | 0.01  | 0.01  | 0.00  | 0.01  | 0.01  | 0.00  |
| 23 | 1 | 0.00  | 0.01  | 0.02  | 0.01  | 0.02  | 0.00  | 0.02  | 0.03  | 0.00  |
| 24 | 1 | -0.02 | -0.01 | 0.03  | 0.00  | 0.02  | 0.00  | -0.01 | 0.01  | 0.01  |
| 25 | 1 | -0.01 | -0.01 | 0.00  | 0.02  | 0.01  | 0.00  | 0.02  | 0.00  | -0.01 |
| 26 | 6 | 0.01  | 0.01  | 0.01  | -0.01 | 0.01  | 0.00  | -0.01 | 0.03  | 0.00  |
| 27 | 1 | 0.02  | -0.01 | 0.01  | -0.02 | 0.02  | 0.00  | -0.01 | 0.02  | 0.01  |
| 28 | 1 | 0.00  | 0.01  | 0.01  | 0.00  | 0.01  | 0.00  | 0.00  | 0.03  | 0.01  |
| 29 | 6 | 0.08  | 0.01  | 0.07  | -0.05 | 0.02  | -0.03 | -0.05 | 0.02  | -0.03 |
| 30 | 1 | 0.12  | 0.05  | 0.05  | -0.08 | 0.00  | -0.01 | -0.08 | 0.00  | -0.01 |
| 31 | 1 | 0.10  | -0.02 | 0.11  | -0.07 | 0.04  | -0.06 | -0.06 | 0.04  | -0.06 |
| 32 | 6 | -0.05 | 0.05  | -0.03 | 0.01  | 0.00  | 0.01  | 0.00  | 0.01  | 0.00  |
| 33 | 1 | -0.09 | 0.08  | -0.06 | 0.02  | -0.01 | 0.01  | 0.01  | 0.00  | 0.01  |
| 34 | 6 | -0.09 | 0.08  | -0.05 | 0.03  | -0.01 | 0.02  | 0.01  | 0.00  | 0.01  |
| 35 | 1 | -0.15 | 0.12  | -0.08 | 0.05  | -0.03 | 0.03  | 0.03  | -0.01 | 0.02  |
| 36 | 6 | 0.00  | 0.07  | 0.00  | -0.01 | -0.03 | 0.01  | -0.01 | 0.00  | 0.01  |
| 37 | 1 | 0.02  | 0.09  | -0.03 | -0.01 | -0.04 | 0.02  | -0.01 | 0.00  | 0.01  |
| 38 | 1 | -0.02 | 0.09  | 0.02  | 0.00  | -0.03 | 0.00  | -0.01 | 0.00  | 0.01  |
| 39 | 1 | 0.00  | 0.05  | 0.00  | -0.01 | -0.02 | 0.01  | -0.01 | 0.00  | 0.02  |
| 40 | 6 | 0.01  | 0.01  | 0.03  | -0.01 | 0.01  | -0.02 | -0.01 | 0.02  | 0.00  |
| 41 | 1 | 0.02  | 0.00  | 0.05  | -0.01 | 0.02  | -0.03 | -0.01 | 0.02  | -0.01 |
| 42 | 6 | -0.01 | -0.01 | -0.01 | -0.01 | 0.01  | 0.00  | 0.00  | 0.01  | -0.01 |
| 43 | 1 | -0.01 | -0.01 | 0.00  | -0.01 | 0.02  | 0.01  | -0.01 | 0.02  | 0.00  |
| 44 | 1 | 0.00  | -0.01 | -0.02 | 0.00  | 0.01  | 0.00  | 0.01  | 0.01  | -0.02 |
| 45 | 1 | -0.01 | -0.01 | -0.02 | -0.01 | 0.01  | 0.00  | 0.00  | 0.00  | -0.02 |
| 46 | 6 | -0.02 | 0.00  | 0.01  | 0.02  | 0.02  | 0.00  | 0.01  | 0.02  | 0.00  |
| 47 | 1 | -0.04 | 0.00  | 0.02  | 0.03  | 0.02  | -0.01 | 0.01  | 0.01  | 0.02  |
| 48 | 6 | -0.03 | -0.02 | 0.01  | 0.02  | 0.03  | -0.01 | 0.02  | 0.04  | -0.02 |
| 49 | 1 | -0.03 | -0.04 | 0.01  | 0.02  | 0.06  | -0.02 | 0.02  | 0.07  | -0.03 |
| 50 | 1 | -0.04 | 0.00  | 0.02  | 0.04  | 0.02  | -0.02 | 0.05  | 0.04  | -0.02 |
| 51 | 6 | -0.01 | -0.01 | -0.01 | 0.00  | 0.03  | 0.01  | 0.01  | 0.04  | -0.01 |
| 52 | 1 | 0.00  | -0.02 | -0.02 | 0.00  | 0.04  | 0.02  | 0.00  | 0.05  | 0.00  |
| 53 | 6 | -0.02 | 0.00  | -0.01 | 0.02  | 0.01  | 0.01  | 0.02  | 0.01  | 0.01  |
| 54 | 1 | -0.02 | 0.00  | -0.01 | 0.03  | 0.01  | 0.02  | 0.04  | 0.02  | 0.03  |
| 55 | 6 | -0.02 | 0.01  | -0.01 | 0.02  | -0.01 | 0.00  | 0.01  | -0.02 | 0.01  |
| 56 | 1 | -0.02 | 0.01  | 0.00  | 0.03  | -0.02 | 0.00  | 0.02  | -0.04 | 0.02  |
| 57 | 6 | 0.00  | 0.00  | -0.01 | -0.01 | 0.01  | 0.00  | -0.02 | 0.01  | -0.02 |
| 58 | 1 | 0.00  | 0.00  | -0.01 | -0.02 | 0.01  | -0.01 | -0.03 | 0.02  | -0.03 |
| 59 | 8 | 0.01  | 0.04  | 0.04  | -0.01 | -0.02 | -0.02 | -0.01 | 0.00  | 0.00  |
| 60 | 8 | 0.05  | -0.05 | -0.07 | -0.02 | -0.01 | 0.02  | 0.00  | -0.04 | -0.01 |
| 61 | 8 | 0.00  | -0.01 | -0.01 | -0.01 | 0.02  | 0.01  | -0.01 | 0.01  | -0.01 |
| 62 | 6 | -0.03 | -0.02 | -0.06 | 0.02  | -0.03 | 0.00  | 0.02  | -0.05 | -0.02 |

|    |   |       |       |       |       |       |       |       |       |       |
|----|---|-------|-------|-------|-------|-------|-------|-------|-------|-------|
| 63 | 6 | -0.01 | -0.05 | -0.03 | 0.01  | -0.03 | 0.00  | 0.01  | -0.06 | -0.01 |
| 64 | 6 | -0.02 | -0.03 | -0.02 | 0.02  | -0.03 | 0.02  | -0.03 | -0.02 | -0.02 |
| 65 | 8 | -0.09 | 0.01  | -0.07 | 0.06  | -0.05 | 0.01  | 0.04  | -0.07 | -0.01 |
| 66 | 1 | -0.06 | 0.02  | -0.06 | 0.02  | -0.02 | 0.01  | -0.04 | 0.02  | -0.04 |
| 67 | 6 | -0.01 | -0.07 | 0.06  | 0.00  | -0.04 | 0.03  | -0.05 | -0.06 | 0.05  |
| 68 | 1 | 0.21  | -0.27 | 0.28  | 0.34  | -0.28 | 0.35  | -0.28 | 0.02  | -0.14 |
| 69 | 1 | 0.09  | 0.02  | -0.24 | 0.15  | 0.17  | -0.45 | -0.15 | -0.19 | 0.37  |
| 70 | 1 | -0.34 | 0.01  | 0.20  | -0.53 | 0.02  | 0.17  | 0.27  | -0.05 | 0.02  |
| 71 | 6 | 0.04  | -0.08 | 0.02  | -0.02 | -0.02 | -0.02 | 0.08  | -0.11 | 0.06  |
| 72 | 1 | 0.15  | -0.26 | 0.17  | -0.01 | -0.03 | -0.04 | 0.25  | -0.37 | 0.28  |
| 73 | 1 | 0.16  | 0.14  | 0.02  | -0.04 | 0.00  | -0.01 | 0.26  | 0.20  | 0.05  |
| 74 | 1 | -0.16 | -0.14 | -0.10 | -0.03 | -0.03 | -0.05 | -0.20 | -0.20 | -0.10 |

|      |                |          |       |       |          |       |       |          |       |       |
|------|----------------|----------|-------|-------|----------|-------|-------|----------|-------|-------|
|      |                | 13       |       |       | 14       |       |       | 15       |       |       |
|      |                | A        |       |       | A        |       |       | A        |       |       |
|      | Frequencies -- | 136.9633 |       |       | 146.5819 |       |       | 162.8786 |       |       |
|      | Red. masses -- | 3.5435   |       |       | 1.6605   |       |       | 2.9250   |       |       |
|      | Frc consts --  | 0.0392   |       |       | 0.0210   |       |       | 0.0457   |       |       |
|      | IR Inten --    | 2.2021   |       |       | 0.0825   |       |       | 3.2313   |       |       |
|      | Raman Activ -- | 2.1107   |       |       | 1.0612   |       |       | 1.7361   |       |       |
|      | Depolar (P) -- | 0.7154   |       |       | 0.6620   |       |       | 0.5382   |       |       |
|      | Depolar (U) -- | 0.8341   |       |       | 0.7966   |       |       | 0.6998   |       |       |
| Atom | AN             | X        | Y     | Z     | X        | Y     | Z     | X        | Y     | Z     |
| 1    | 6              | -0.01    | 0.02  | -0.03 | -0.01    | 0.00  | -0.02 | 0.00     | 0.05  | -0.02 |
| 2    | 6              | 0.06     | -0.01 | 0.01  | 0.02     | -0.02 | -0.01 | -0.02    | 0.02  | 0.00  |
| 3    | 6              | -0.02    | -0.01 | -0.06 | -0.01    | -0.01 | -0.03 | 0.01     | 0.03  | 0.01  |
| 4    | 6              | -0.03    | -0.02 | -0.04 | 0.00     | -0.02 | -0.01 | 0.01     | 0.01  | 0.03  |
| 5    | 6              | -0.02    | 0.01  | -0.01 | 0.00     | -0.02 | 0.00  | 0.01     | 0.01  | 0.01  |
| 6    | 6              | -0.07    | -0.03 | 0.05  | 0.00     | -0.02 | 0.01  | 0.03     | 0.03  | -0.02 |
| 7    | 8              | 0.17     | -0.06 | 0.07  | 0.05     | -0.03 | 0.02  | -0.07    | 0.04  | 0.01  |
| 8    | 6              | 0.01     | 0.01  | 0.01  | -0.01    | -0.01 | 0.01  | 0.00     | -0.01 | -0.01 |
| 9    | 6              | -0.03    | 0.00  | -0.03 | -0.02    | 0.00  | -0.02 | -0.01    | 0.03  | -0.06 |
| 10   | 1              | -0.06    | -0.01 | -0.02 | -0.02    | -0.01 | -0.02 | 0.02     | 0.01  | -0.08 |
| 11   | 8              | -0.02    | 0.02  | 0.01  | -0.02    | 0.00  | -0.01 | -0.03    | 0.03  | -0.08 |
| 12   | 6              | -0.04    | -0.02 | -0.05 | -0.02    | 0.01  | 0.01  | 0.00     | 0.01  | 0.02  |
| 13   | 1              | -0.06    | -0.02 | -0.05 | -0.01    | -0.01 | 0.03  | 0.04     | 0.00  | 0.04  |
| 14   | 6              | -0.05    | 0.00  | 0.08  | 0.01     | 0.01  | 0.01  | 0.03     | 0.03  | -0.04 |
| 15   | 8              | 0.06     | 0.02  | -0.02 | 0.01     | 0.00  | 0.01  | -0.04    | -0.02 | 0.00  |
| 16   | 6              | -0.03    | -0.05 | 0.04  | -0.05    | -0.06 | 0.05  | -0.06    | -0.12 | 0.04  |
| 17   | 1              | 0.00     | 0.03  | 0.10  | -0.02    | 0.00  | 0.10  | -0.01    | 0.01  | 0.15  |
| 18   | 1              | -0.08    | -0.14 | 0.11  | -0.09    | -0.12 | 0.10  | -0.14    | -0.29 | 0.17  |
| 19   | 1              | -0.03    | -0.09 | -0.07 | -0.05    | -0.08 | -0.03 | -0.05    | -0.18 | -0.15 |
| 20   | 6              | -0.01    | 0.02  | -0.04 | -0.03    | 0.00  | -0.02 | -0.02    | 0.04  | -0.07 |
| 21   | 1              | 0.00     | 0.02  | -0.05 | -0.02    | 0.00  | -0.03 | -0.01    | 0.04  | -0.08 |
| 22   | 6              | -0.02    | 0.07  | 0.01  | -0.01    | 0.02  | -0.01 | 0.05     | 0.14  | -0.01 |
| 23   | 1              | -0.03    | 0.02  | 0.03  | -0.04    | -0.04 | -0.01 | -0.06    | -0.08 | -0.05 |
| 24   | 1              | 0.01     | 0.11  | -0.04 | 0.05     | 0.05  | -0.05 | 0.28     | 0.27  | -0.18 |
| 25   | 1              | -0.03    | 0.11  | 0.06  | -0.03    | 0.07  | 0.04  | -0.01    | 0.31  | 0.23  |
| 26   | 6              | -0.05    | -0.03 | 0.06  | -0.01    | -0.02 | 0.02  | 0.02     | 0.03  | 0.01  |
| 27   | 1              | -0.12    | -0.05 | 0.11  | -0.05    | -0.02 | 0.04  | 0.01     | 0.01  | 0.03  |
| 28   | 1              | 0.04     | -0.03 | 0.11  | 0.02     | -0.01 | 0.04  | 0.02     | 0.06  | 0.03  |
| 29   | 6              | 0.05     | 0.03  | 0.04  | 0.03     | -0.01 | 0.02  | 0.10     | 0.00  | 0.00  |
| 30   | 1              | 0.12     | 0.06  | 0.01  | 0.08     | 0.01  | -0.01 | 0.21     | 0.03  | -0.07 |

|    |   |       |       |       |       |       |       |       |       |       |
|----|---|-------|-------|-------|-------|-------|-------|-------|-------|-------|
| 31 | 1 | 0.07  | 0.01  | 0.12  | 0.05  | -0.02 | 0.07  | 0.13  | -0.05 | 0.12  |
| 32 | 6 | 0.01  | 0.04  | -0.02 | 0.00  | 0.00  | 0.00  | 0.00  | -0.02 | -0.01 |
| 33 | 1 | -0.01 | 0.06  | -0.03 | 0.00  | 0.01  | 0.00  | 0.01  | -0.03 | -0.01 |
| 34 | 6 | 0.02  | 0.03  | -0.02 | 0.01  | -0.01 | -0.01 | 0.00  | -0.02 | 0.01  |
| 35 | 1 | 0.03  | 0.03  | -0.03 | 0.02  | -0.01 | -0.01 | 0.00  | -0.03 | 0.02  |
| 36 | 6 | -0.01 | -0.03 | -0.05 | 0.00  | -0.04 | -0.01 | 0.01  | 0.01  | 0.03  |
| 37 | 1 | 0.00  | -0.03 | -0.04 | 0.00  | -0.06 | 0.01  | -0.01 | 0.00  | 0.03  |
| 38 | 1 | -0.01 | -0.03 | -0.05 | 0.01  | -0.06 | -0.03 | 0.02  | 0.00  | 0.02  |
| 39 | 1 | -0.01 | -0.04 | -0.05 | 0.00  | -0.04 | -0.02 | 0.01  | 0.02  | 0.03  |
| 40 | 6 | -0.03 | -0.01 | -0.04 | -0.01 | -0.01 | -0.02 | 0.01  | 0.03  | 0.01  |
| 41 | 1 | -0.05 | 0.02  | -0.09 | -0.02 | 0.00  | -0.04 | 0.01  | 0.04  | 0.00  |
| 42 | 6 | -0.10 | -0.06 | 0.03  | 0.01  | -0.04 | 0.00  | 0.04  | 0.00  | -0.03 |
| 43 | 1 | -0.11 | -0.09 | 0.05  | 0.02  | -0.06 | 0.00  | 0.05  | -0.03 | -0.02 |
| 44 | 1 | -0.11 | -0.06 | 0.01  | 0.01  | -0.05 | -0.02 | 0.03  | 0.00  | -0.06 |
| 45 | 1 | -0.10 | -0.06 | 0.02  | 0.01  | -0.05 | 0.02  | 0.04  | 0.00  | -0.01 |
| 46 | 6 | 0.03  | 0.07  | -0.06 | 0.02  | 0.00  | -0.01 | -0.02 | -0.04 | 0.05  |
| 47 | 1 | 0.07  | 0.10  | -0.13 | 0.04  | 0.00  | -0.01 | -0.04 | -0.06 | 0.11  |
| 48 | 6 | 0.00  | 0.05  | -0.02 | 0.04  | 0.02  | -0.02 | 0.00  | -0.01 | 0.02  |
| 49 | 1 | 0.04  | 0.10  | 0.00  | 0.04  | 0.06  | -0.04 | -0.02 | -0.04 | 0.01  |
| 50 | 1 | -0.01 | 0.00  | -0.07 | 0.07  | 0.00  | -0.04 | 0.03  | 0.02  | 0.06  |
| 51 | 6 | -0.05 | 0.01  | 0.08  | 0.01  | 0.01  | 0.01  | 0.02  | 0.02  | -0.04 |
| 52 | 1 | -0.05 | 0.05  | 0.12  | 0.00  | 0.03  | 0.02  | 0.01  | 0.00  | -0.06 |
| 53 | 6 | -0.01 | 0.01  | 0.03  | 0.02  | 0.00  | 0.01  | 0.03  | 0.01  | -0.01 |
| 54 | 1 | -0.03 | 0.00  | 0.02  | 0.02  | 0.00  | 0.02  | 0.05  | 0.01  | 0.01  |
| 55 | 6 | 0.06  | 0.02  | -0.03 | 0.02  | 0.00  | 0.01  | -0.02 | -0.02 | 0.02  |
| 56 | 1 | 0.10  | 0.02  | -0.09 | 0.02  | -0.01 | 0.01  | -0.04 | -0.04 | 0.06  |
| 57 | 6 | 0.00  | 0.01  | 0.05  | 0.01  | 0.00  | 0.01  | -0.01 | 0.01  | -0.04 |
| 58 | 1 | 0.00  | 0.01  | 0.07  | 0.00  | 0.01  | 0.01  | -0.03 | 0.01  | -0.06 |
| 59 | 8 | 0.01  | -0.04 | -0.07 | 0.01  | -0.03 | -0.04 | 0.03  | 0.02  | 0.00  |
| 60 | 8 | -0.03 | -0.02 | -0.06 | -0.04 | 0.04  | 0.03  | -0.09 | 0.02  | 0.07  |
| 61 | 8 | 0.01  | 0.12  | 0.03  | 0.00  | 0.01  | 0.01  | -0.02 | -0.07 | -0.02 |
| 62 | 6 | 0.01  | -0.01 | -0.03 | -0.02 | 0.03  | 0.01  | -0.01 | -0.03 | 0.02  |
| 63 | 6 | 0.00  | -0.03 | 0.00  | 0.01  | 0.04  | -0.01 | -0.04 | -0.02 | 0.00  |
| 64 | 6 | -0.04 | 0.01  | -0.01 | 0.04  | 0.02  | 0.01  | -0.04 | -0.02 | -0.01 |
| 65 | 8 | 0.07  | 0.01  | -0.02 | -0.03 | 0.01  | 0.01  | 0.07  | -0.09 | 0.03  |
| 66 | 1 | -0.08 | 0.04  | -0.04 | 0.07  | 0.01  | 0.03  | -0.07 | -0.01 | -0.03 |
| 67 | 6 | -0.01 | -0.02 | 0.03  | -0.01 | 0.03  | 0.01  | 0.01  | -0.04 | 0.02  |
| 68 | 1 | -0.05 | 0.01  | -0.01 | -0.01 | 0.00  | 0.01  | 0.04  | -0.05 | 0.04  |
| 69 | 1 | -0.03 | -0.09 | 0.11  | -0.01 | 0.08  | 0.00  | 0.02  | -0.10 | 0.00  |
| 70 | 1 | 0.09  | 0.00  | 0.04  | -0.05 | 0.03  | 0.01  | 0.03  | -0.02 | 0.05  |
| 71 | 6 | 0.05  | -0.09 | 0.05  | -0.01 | 0.10  | -0.03 | 0.00  | -0.04 | 0.03  |
| 72 | 1 | -0.09 | 0.13  | -0.10 | 0.21  | -0.25 | 0.22  | -0.07 | 0.06  | -0.03 |
| 73 | 1 | 0.00  | -0.42 | 0.00  | 0.12  | 0.59  | 0.02  | -0.02 | -0.21 | 0.00  |
| 74 | 1 | 0.28  | -0.02 | 0.31  | -0.38 | -0.01 | -0.38 | 0.11  | -0.01 | 0.16  |

|                |          |          |          |
|----------------|----------|----------|----------|
|                | 16       | 17       | 18       |
|                | A        | A        | A        |
| Frequencies -- | 170.3036 | 187.0113 | 191.0563 |
| Red. masses -- | 4.1750   | 3.0220   | 2.0408   |
| Frc consts --  | 0.0713   | 0.0623   | 0.0439   |
| IR Inten --    | 0.7375   | 2.2468   | 0.8255   |
| Raman Activ -- | 2.1817   | 2.1210   | 0.6412   |
| Depolar (P) -- | 0.4723   | 0.3860   | 0.7003   |

| Depolar (U) -- |   |       |       | 0.6416 |       | 0.5570 |       |       | 0.8237 |       |   |
|----------------|---|-------|-------|--------|-------|--------|-------|-------|--------|-------|---|
| Atom           |   | AN    | X     | Y      | Z     | X      | Y     | Z     | X      | Y     | Z |
| 1              | 6 | -0.03 | -0.03 | 0.03   | 0.00  | 0.00   | -0.03 | 0.00  | 0.01   | 0.00  |   |
| 2              | 6 | -0.02 | 0.00  | 0.00   | 0.04  | -0.01  | -0.01 | -0.01 | 0.00   | 0.03  |   |
| 3              | 6 | -0.02 | -0.03 | 0.00   | -0.01 | 0.00   | -0.01 | -0.01 | -0.01  | -0.02 |   |
| 4              | 6 | 0.00  | -0.02 | -0.04  | -0.01 | 0.00   | 0.00  | -0.01 | -0.02  | -0.02 |   |
| 5              | 6 | 0.03  | -0.06 | -0.01  | -0.02 | 0.01   | 0.01  | 0.00  | -0.02  | -0.01 |   |
| 6              | 6 | 0.05  | 0.00  | -0.04  | -0.03 | 0.04   | 0.01  | -0.01 | -0.01  | 0.00  |   |
| 7              | 8 | 0.05  | -0.03 | 0.01   | 0.08  | -0.03  | 0.01  | -0.08 | 0.03   | 0.02  |   |
| 8              | 6 | -0.06 | 0.02  | 0.05   | 0.03  | 0.00   | -0.02 | -0.02 | 0.02   | -0.01 |   |
| 9              | 6 | -0.07 | 0.03  | 0.01   | 0.01  | -0.02  | -0.01 | 0.00  | -0.01  | 0.04  |   |
| 10             | 1 | -0.09 | 0.07  | 0.02   | 0.01  | -0.04  | -0.01 | -0.04 | -0.04  | 0.05  |   |
| 11             | 8 | -0.09 | 0.02  | 0.00   | 0.03  | -0.01  | 0.01  | 0.06  | -0.01  | 0.10  |   |
| 12             | 6 | -0.07 | 0.01  | -0.06  | 0.01  | -0.01  | -0.01 | -0.01 | -0.01  | -0.02 |   |
| 13             | 1 | -0.12 | 0.01  | -0.06  | 0.02  | 0.00   | -0.02 | -0.05 | 0.00   | -0.03 |   |
| 14             | 6 | 0.08  | 0.06  | -0.01  | -0.02 | 0.11   | -0.03 | 0.00  | 0.03   | 0.01  |   |
| 15             | 8 | 0.00  | -0.03 | 0.04   | -0.08 | -0.05  | -0.06 | -0.01 | -0.01  | 0.00  |   |
| 16             | 6 | -0.10 | 0.03  | 0.12   | 0.06  | 0.01   | -0.05 | 0.00  | 0.02   | -0.04 |   |
| 17             | 1 | -0.07 | 0.06  | 0.18   | 0.04  | 0.12   | -0.05 | -0.02 | -0.22  | -0.14 |   |
| 18             | 1 | -0.18 | 0.01  | 0.13   | 0.03  | -0.07  | 0.01  | 0.14  | 0.21   | -0.18 |   |
| 19             | 1 | -0.10 | 0.03  | 0.10   | 0.14  | -0.02  | -0.15 | -0.12 | 0.09   | 0.18  |   |
| 20             | 6 | -0.05 | 0.00  | 0.04   | 0.02  | -0.01  | -0.02 | -0.01 | 0.01   | 0.00  |   |
| 21             | 1 | -0.06 | -0.03 | 0.04   | 0.04  | 0.00   | -0.03 | -0.02 | 0.03   | 0.01  |   |
| 22             | 6 | -0.07 | -0.09 | 0.02   | -0.02 | 0.00   | -0.02 | 0.04  | 0.09   | 0.03  |   |
| 23             | 1 | -0.04 | -0.05 | 0.04   | 0.12  | 0.27   | 0.05  | -0.13 | -0.25  | -0.04 |   |
| 24             | 1 | -0.13 | -0.14 | 0.08   | -0.29 | -0.08  | 0.13  | 0.38  | 0.24   | -0.20 |   |
| 25             | 1 | -0.08 | -0.12 | -0.07  | 0.09  | -0.19  | -0.23 | -0.08 | 0.34   | 0.35  |   |
| 26             | 6 | -0.01 | -0.01 | -0.04  | -0.05 | 0.03   | 0.13  | -0.02 | -0.01  | 0.03  |   |
| 27             | 1 | 0.02  | 0.02  | -0.08  | -0.14 | -0.05  | 0.22  | -0.06 | -0.03  | 0.06  |   |
| 28             | 1 | -0.07 | -0.01 | -0.07  | 0.04  | 0.13   | 0.22  | 0.02  | 0.02   | 0.06  |   |
| 29             | 6 | -0.06 | 0.01  | 0.02   | 0.02  | 0.00   | 0.00  | -0.02 | 0.03   | 0.03  |   |
| 30             | 1 | -0.05 | -0.02 | 0.01   | 0.02  | 0.01   | 0.01  | -0.07 | 0.07   | 0.08  |   |
| 31             | 1 | -0.06 | 0.01  | 0.03   | 0.02  | 0.01   | 0.00  | -0.02 | 0.03   | 0.00  |   |
| 32             | 6 | -0.05 | 0.05  | 0.03   | 0.04  | 0.00   | -0.02 | -0.03 | 0.01   | 0.00  |   |
| 33             | 1 | -0.06 | 0.08  | 0.03   | 0.05  | -0.01  | -0.01 | -0.05 | 0.00   | -0.01 |   |
| 34             | 6 | -0.08 | 0.07  | -0.03  | 0.06  | -0.01  | -0.01 | 0.01  | -0.02  | 0.04  |   |
| 35             | 1 | -0.11 | 0.11  | -0.06  | 0.08  | -0.03  | 0.00  | 0.02  | -0.04  | 0.06  |   |
| 36             | 6 | 0.05  | 0.03  | -0.05  | -0.03 | 0.03   | 0.01  | 0.00  | -0.05  | -0.03 |   |
| 37             | 1 | 0.05  | 0.03  | -0.06  | -0.11 | -0.01  | 0.01  | 0.09  | -0.02  | -0.02 |   |
| 38             | 1 | 0.09  | 0.03  | -0.01  | 0.04  | -0.02  | -0.01 | -0.09 | -0.01  | -0.03 |   |
| 39             | 1 | 0.06  | 0.06  | -0.07  | -0.02 | 0.12   | 0.02  | -0.01 | -0.16  | -0.03 |   |
| 40             | 6 | -0.02 | -0.05 | 0.02   | -0.04 | 0.02   | 0.02  | -0.02 | -0.01  | -0.02 |   |
| 41             | 1 | -0.02 | -0.09 | 0.07   | -0.08 | 0.04   | -0.02 | -0.03 | 0.01   | -0.04 |   |
| 42             | 6 | 0.08  | -0.04 | -0.05  | -0.01 | -0.07  | -0.02 | 0.00  | -0.05  | -0.02 |   |
| 43             | 1 | 0.06  | -0.03 | -0.04  | -0.01 | -0.12  | 0.00  | -0.01 | -0.07  | -0.01 |   |
| 44             | 1 | 0.14  | -0.04 | -0.07  | -0.01 | -0.07  | -0.11 | 0.02  | -0.05  | -0.05 |   |
| 45             | 1 | 0.07  | -0.10 | -0.04  | -0.01 | -0.09  | 0.01  | -0.01 | -0.08  | -0.01 |   |
| 46             | 6 | 0.08  | -0.08 | 0.05   | -0.03 | -0.05  | 0.10  | 0.02  | -0.03  | 0.02  |   |
| 47             | 1 | 0.11  | -0.13 | 0.10   | -0.04 | -0.10  | 0.18  | 0.03  | -0.05  | 0.04  |   |
| 48             | 6 | 0.13  | 0.03  | 0.00   | -0.02 | 0.04   | 0.09  | 0.03  | 0.01   | 0.01  |   |
| 49             | 1 | 0.11  | 0.08  | -0.04  | -0.02 | 0.00   | 0.10  | 0.03  | 0.02   | 0.01  |   |
| 50             | 1 | 0.22  | 0.03  | 0.02   | 0.02  | 0.09   | 0.16  | 0.05  | 0.01   | 0.02  |   |

|    |   |       |       |       |       |       |       |       |       |       |
|----|---|-------|-------|-------|-------|-------|-------|-------|-------|-------|
| 51 | 6 | 0.08  | 0.06  | -0.03 | -0.03 | 0.10  | -0.01 | 0.00  | 0.02  | 0.00  |
| 52 | 1 | 0.07  | 0.07  | -0.03 | -0.07 | 0.07  | -0.05 | -0.01 | 0.02  | 0.00  |
| 53 | 6 | 0.11  | 0.02  | 0.06  | 0.04  | 0.05  | 0.02  | 0.02  | 0.01  | 0.02  |
| 54 | 1 | 0.16  | 0.04  | 0.09  | 0.10  | 0.07  | 0.08  | 0.04  | 0.02  | 0.03  |
| 55 | 6 | 0.05  | -0.03 | 0.08  | 0.00  | -0.05 | 0.01  | 0.02  | -0.01 | 0.01  |
| 56 | 1 | 0.03  | -0.08 | 0.13  | 0.03  | -0.13 | 0.03  | 0.02  | -0.03 | 0.02  |
| 57 | 6 | 0.03  | 0.03  | -0.01 | -0.09 | 0.06  | -0.08 | -0.01 | 0.01  | -0.01 |
| 58 | 1 | -0.01 | 0.04  | -0.05 | -0.15 | 0.07  | -0.14 | -0.03 | 0.02  | -0.02 |
| 59 | 8 | -0.06 | 0.01  | 0.05  | 0.03  | -0.02 | -0.02 | 0.00  | -0.03 | -0.04 |
| 60 | 8 | -0.02 | 0.02  | -0.09 | 0.02  | -0.02 | -0.02 | 0.05  | -0.02 | -0.06 |
| 61 | 8 | 0.02  | -0.12 | -0.03 | -0.04 | -0.10 | -0.02 | 0.00  | -0.05 | -0.01 |
| 62 | 6 | 0.00  | 0.04  | -0.06 | 0.01  | 0.00  | 0.02  | 0.01  | 0.01  | -0.02 |
| 63 | 6 | -0.01 | 0.03  | -0.04 | 0.02  | -0.01 | 0.03  | 0.02  | 0.00  | 0.00  |
| 64 | 6 | -0.03 | 0.05  | -0.03 | 0.04  | -0.03 | 0.03  | 0.02  | 0.00  | 0.01  |
| 65 | 8 | 0.04  | 0.05  | -0.06 | -0.01 | 0.04  | 0.01  | -0.03 | 0.06  | -0.03 |
| 66 | 1 | -0.05 | 0.08  | -0.06 | 0.05  | -0.06 | 0.06  | 0.03  | 0.00  | 0.02  |
| 67 | 6 | 0.03  | 0.00  | 0.03  | 0.00  | 0.02  | -0.05 | 0.00  | 0.02  | -0.02 |
| 68 | 1 | 0.05  | -0.02 | 0.05  | -0.01 | 0.06  | -0.07 | -0.01 | 0.03  | -0.03 |
| 69 | 1 | 0.03  | -0.07 | 0.03  | 0.00  | 0.08  | -0.05 | -0.01 | 0.05  | -0.01 |
| 70 | 1 | 0.06  | 0.05  | 0.08  | -0.03 | -0.04 | -0.11 | -0.01 | 0.00  | -0.04 |
| 71 | 6 | 0.02  | -0.02 | -0.01 | -0.02 | 0.01  | 0.00  | 0.00  | 0.00  | -0.02 |
| 72 | 1 | -0.07 | 0.12  | -0.10 | -0.04 | 0.03  | -0.04 | -0.01 | 0.01  | -0.05 |
| 73 | 1 | -0.01 | -0.23 | -0.04 | -0.07 | -0.02 | 0.01  | -0.03 | -0.03 | -0.01 |
| 74 | 1 | 0.16  | 0.02  | 0.16  | 0.01  | 0.02  | 0.00  | 0.02  | 0.00  | -0.01 |

|                |    |          |       |       |          |       |       |          |       |       |
|----------------|----|----------|-------|-------|----------|-------|-------|----------|-------|-------|
|                |    | 19       |       |       | 20       |       |       | 21       |       |       |
|                |    | A        |       |       | A        |       |       | A        |       |       |
| Frequencies -- |    | 198.9215 |       |       | 202.8828 |       |       | 206.2005 |       |       |
| Red. masses -- |    | 3.4742   |       |       | 2.5551   |       |       | 1.8592   |       |       |
| Frc consts --  |    | 0.0810   |       |       | 0.0620   |       |       | 0.0466   |       |       |
| IR Inten --    |    | 4.2814   |       |       | 3.5400   |       |       | 0.2739   |       |       |
| Raman Activ -- |    | 1.4040   |       |       | 1.6707   |       |       | 1.9619   |       |       |
| Depolar (P) -- |    | 0.3747   |       |       | 0.5041   |       |       | 0.5243   |       |       |
| Depolar (U) -- |    | 0.5452   |       |       | 0.6703   |       |       | 0.6879   |       |       |
| Atom           | AN | X        | Y     | Z     | X        | Y     | Z     | X        | Y     | Z     |
| 1              | 6  | 0.01     | 0.01  | 0.02  | 0.00     | -0.03 | -0.04 | 0.00     | -0.01 | -0.01 |
| 2              | 6  | -0.02    | 0.04  | 0.00  | 0.03     | -0.03 | -0.05 | 0.02     | -0.04 | 0.00  |
| 3              | 6  | 0.00     | 0.00  | 0.01  | 0.00     | 0.00  | 0.03  | 0.00     | -0.02 | 0.02  |
| 4              | 6  | 0.00     | -0.01 | 0.00  | 0.00     | 0.02  | 0.02  | -0.01    | 0.00  | 0.00  |
| 5              | 6  | 0.00     | -0.01 | -0.01 | -0.01    | 0.03  | 0.04  | 0.00     | -0.01 | 0.00  |
| 6              | 6  | 0.00     | 0.00  | -0.01 | 0.01     | 0.03  | 0.02  | 0.01     | 0.00  | 0.00  |
| 7              | 8  | -0.01    | 0.03  | 0.00  | 0.16     | -0.09 | -0.02 | -0.02    | -0.01 | -0.03 |
| 8              | 6  | 0.01     | 0.00  | 0.02  | -0.02    | 0.00  | -0.01 | -0.05    | 0.02  | -0.03 |
| 9              | 6  | -0.01    | 0.03  | -0.02 | -0.01    | -0.03 | -0.01 | -0.03    | -0.04 | 0.01  |
| 10             | 1  | 0.04     | 0.09  | -0.03 | -0.01    | -0.06 | -0.02 | -0.06    | -0.10 | 0.02  |
| 11             | 8  | -0.10    | 0.04  | -0.10 | 0.00     | -0.02 | 0.01  | 0.02     | -0.03 | 0.09  |
| 12             | 6  | -0.01    | -0.02 | -0.02 | 0.01     | 0.00  | 0.00  | -0.01    | -0.01 | -0.01 |
| 13             | 1  | -0.04    | 0.00  | -0.04 | 0.03     | 0.01  | -0.01 | -0.01    | 0.00  | -0.03 |
| 14             | 6  | 0.00     | -0.01 | 0.01  | 0.00     | 0.02  | -0.05 | 0.01     | 0.00  | 0.01  |
| 15             | 8  | 0.01     | 0.00  | 0.00  | -0.05    | -0.01 | -0.03 | 0.01     | 0.00  | 0.01  |
| 16             | 6  | -0.02    | 0.00  | 0.06  | -0.06    | 0.03  | 0.06  | -0.06    | 0.00  | -0.02 |
| 17             | 1  | 0.00     | 0.09  | 0.13  | -0.03    | -0.15 | 0.06  | -0.05    | 0.45  | 0.14  |
| 18             | 1  | -0.10    | -0.09 | 0.13  | -0.04    | 0.18  | -0.05 | -0.29    | -0.35 | 0.25  |

|    |   |       |       |       |       |       |       |       |       |       |
|----|---|-------|-------|-------|-------|-------|-------|-------|-------|-------|
| 19 | 1 | 0.01  | -0.03 | -0.03 | -0.16 | 0.08  | 0.24  | 0.16  | -0.13 | -0.43 |
| 20 | 6 | 0.00  | 0.01  | 0.01  | -0.02 | -0.02 | -0.03 | -0.04 | -0.01 | -0.03 |
| 21 | 1 | 0.01  | 0.00  | 0.01  | -0.03 | -0.02 | -0.03 | -0.06 | -0.01 | -0.02 |
| 22 | 6 | 0.01  | 0.03  | 0.02  | 0.05  | -0.06 | -0.08 | 0.07  | 0.06  | -0.03 |
| 23 | 1 | -0.02 | -0.03 | 0.01  | -0.13 | -0.37 | -0.20 | 0.10  | 0.14  | -0.04 |
| 24 | 1 | 0.07  | 0.06  | -0.02 | 0.39  | 0.01  | -0.24 | 0.02  | 0.08  | -0.03 |
| 25 | 1 | -0.01 | 0.07  | 0.08  | -0.08 | 0.15  | 0.15  | 0.14  | 0.01  | -0.01 |
| 26 | 6 | 0.01  | 0.00  | -0.03 | 0.01  | 0.03  | 0.01  | 0.01  | 0.00  | -0.04 |
| 27 | 1 | 0.04  | 0.01  | -0.05 | 0.04  | 0.04  | -0.01 | 0.06  | 0.03  | -0.08 |
| 28 | 1 | -0.01 | -0.02 | -0.05 | -0.04 | 0.02  | -0.02 | -0.05 | -0.03 | -0.08 |
| 29 | 6 | 0.01  | -0.01 | -0.02 | -0.02 | -0.01 | -0.01 | -0.06 | 0.03  | 0.02  |
| 30 | 1 | 0.08  | -0.04 | -0.08 | -0.03 | 0.00  | 0.00  | -0.12 | 0.06  | 0.07  |
| 31 | 1 | 0.01  | 0.00  | 0.03  | -0.02 | -0.01 | -0.02 | -0.07 | 0.04  | -0.02 |
| 32 | 6 | -0.01 | 0.02  | 0.01  | 0.03  | 0.01  | -0.02 | 0.00  | 0.00  | -0.02 |
| 33 | 1 | -0.02 | 0.03  | 0.00  | 0.05  | 0.02  | 0.01  | -0.01 | 0.02  | -0.03 |
| 34 | 6 | -0.06 | 0.06  | -0.02 | 0.02  | 0.01  | -0.06 | 0.09  | -0.06 | 0.04  |
| 35 | 1 | -0.11 | 0.09  | -0.05 | 0.04  | 0.02  | -0.06 | 0.15  | -0.10 | 0.07  |
| 36 | 6 | 0.01  | 0.02  | 0.00  | 0.03  | 0.00  | 0.01  | -0.02 | 0.03  | 0.01  |
| 37 | 1 | 0.01  | 0.02  | -0.01 | 0.23  | 0.10  | -0.02 | 0.00  | 0.05  | -0.02 |
| 38 | 1 | 0.02  | 0.02  | 0.02  | -0.14 | 0.12  | 0.06  | -0.05 | 0.05  | 0.02  |
| 39 | 1 | 0.01  | 0.03  | -0.01 | 0.02  | -0.23 | -0.03 | -0.02 | 0.00  | 0.02  |
| 40 | 6 | 0.01  | 0.00  | 0.00  | 0.00  | -0.01 | 0.06  | 0.01  | -0.02 | 0.03  |
| 41 | 1 | 0.02  | -0.01 | 0.01  | 0.00  | -0.04 | 0.10  | 0.01  | -0.04 | 0.06  |
| 42 | 6 | -0.02 | 0.01  | -0.01 | 0.03  | 0.07  | 0.05  | 0.01  | 0.05  | 0.01  |
| 43 | 1 | -0.05 | 0.04  | 0.00  | 0.04  | 0.11  | 0.02  | -0.01 | 0.10  | 0.00  |
| 44 | 1 | 0.01  | 0.01  | 0.00  | 0.05  | 0.07  | 0.09  | 0.03  | 0.06  | 0.06  |
| 45 | 1 | -0.03 | -0.01 | -0.05 | 0.03  | 0.07  | 0.05  | 0.00  | 0.04  | -0.01 |
| 46 | 6 | 0.01  | 0.00  | -0.01 | -0.04 | 0.02  | 0.03  | 0.00  | 0.00  | -0.01 |
| 47 | 1 | 0.01  | 0.00  | -0.02 | -0.06 | 0.03  | 0.03  | 0.01  | 0.00  | -0.01 |
| 48 | 6 | 0.01  | 0.00  | -0.02 | -0.05 | 0.00  | 0.03  | 0.01  | 0.01  | -0.01 |
| 49 | 1 | 0.01  | 0.02  | -0.02 | -0.06 | -0.06 | 0.05  | 0.01  | 0.02  | -0.02 |
| 50 | 1 | 0.02  | -0.01 | -0.03 | -0.08 | 0.03  | 0.07  | 0.02  | 0.00  | -0.02 |
| 51 | 6 | 0.00  | -0.01 | 0.00  | -0.02 | 0.02  | -0.02 | 0.01  | 0.00  | 0.00  |
| 52 | 1 | 0.01  | 0.00  | 0.01  | -0.04 | -0.01 | -0.05 | 0.01  | 0.01  | 0.01  |
| 53 | 6 | 0.00  | 0.00  | 0.00  | -0.01 | 0.01  | -0.03 | 0.01  | 0.00  | 0.01  |
| 54 | 1 | -0.01 | 0.00  | 0.00  | 0.00  | 0.01  | -0.02 | 0.00  | 0.00  | 0.01  |
| 55 | 6 | 0.01  | 0.00  | 0.00  | -0.04 | -0.01 | -0.01 | 0.01  | 0.00  | 0.01  |
| 56 | 1 | 0.01  | 0.01  | -0.01 | -0.05 | -0.02 | 0.01  | 0.01  | 0.01  | 0.01  |
| 57 | 6 | 0.01  | 0.00  | 0.01  | -0.03 | 0.01  | -0.05 | 0.01  | 0.00  | 0.01  |
| 58 | 1 | 0.01  | 0.00  | 0.01  | -0.04 | 0.01  | -0.07 | 0.01  | 0.00  | 0.01  |
| 59 | 8 | -0.01 | 0.01  | 0.01  | 0.00  | 0.04  | 0.08  | -0.01 | 0.01  | 0.05  |
| 60 | 8 | 0.02  | -0.07 | -0.04 | 0.01  | 0.00  | 0.00  | 0.03  | -0.01 | -0.03 |
| 61 | 8 | 0.00  | 0.00  | -0.01 | -0.01 | 0.03  | 0.04  | -0.01 | 0.01  | 0.00  |
| 62 | 6 | 0.06  | -0.06 | 0.03  | 0.01  | -0.01 | 0.00  | 0.00  | 0.00  | -0.01 |
| 63 | 6 | 0.16  | -0.11 | 0.11  | 0.01  | -0.01 | 0.00  | 0.01  | -0.01 | 0.00  |
| 64 | 6 | 0.17  | -0.11 | 0.14  | 0.01  | -0.01 | 0.00  | 0.01  | 0.00  | 0.00  |
| 65 | 8 | -0.08 | 0.05  | 0.02  | -0.02 | 0.00  | 0.00  | -0.02 | 0.03  | -0.02 |
| 66 | 1 | 0.27  | -0.16 | 0.23  | 0.02  | -0.01 | 0.01  | 0.02  | 0.00  | 0.00  |
| 67 | 6 | -0.11 | 0.06  | -0.10 | -0.01 | 0.00  | 0.00  | -0.01 | 0.00  | -0.01 |
| 68 | 1 | -0.23 | 0.13  | -0.21 | -0.02 | 0.00  | -0.01 | -0.01 | 0.01  | -0.01 |
| 69 | 1 | -0.14 | 0.37  | -0.03 | -0.01 | 0.02  | 0.00  | -0.01 | 0.02  | 0.00  |
| 70 | 1 | -0.23 | -0.14 | -0.30 | -0.01 | -0.01 | -0.01 | -0.01 | 0.00  | -0.02 |



|                |    |          |       |       |          |       |       |          |       |       |
|----------------|----|----------|-------|-------|----------|-------|-------|----------|-------|-------|
| 71             | 6  | 0.02     | -0.07 | -0.01 | 0.00     | -0.02 | -0.01 | 0.00     | -0.01 | -0.01 |
| 72             | 1  | 0.02     | -0.05 | -0.11 | 0.00     | -0.01 | -0.03 | 0.00     | -0.01 | -0.02 |
| 73             | 1  | -0.10    | -0.08 | 0.05  | -0.01    | -0.03 | 0.00  | -0.01    | -0.01 | -0.01 |
| 74             | 1  | 0.04     | -0.06 | -0.05 | 0.01     | -0.01 | 0.00  | 0.00     | -0.01 | -0.01 |
|                |    | 22       |       |       | 23       |       |       | 24       |       |       |
|                |    | A        |       |       | A        |       |       | A        |       |       |
| Frequencies -- |    | 212.9780 |       |       | 229.9752 |       |       | 232.0079 |       |       |
| Red. masses -- |    | 3.7957   |       |       | 3.9872   |       |       | 2.5064   |       |       |
| Frc consts --  |    | 0.1014   |       |       | 0.1242   |       |       | 0.0795   |       |       |
| IR Inten --    |    | 1.5781   |       |       | 7.8008   |       |       | 0.7597   |       |       |
| Raman Activ -- |    | 0.9869   |       |       | 1.6674   |       |       | 1.8205   |       |       |
| Depolar (P) -- |    | 0.3748   |       |       | 0.2813   |       |       | 0.4625   |       |       |
| Depolar (U) -- |    | 0.5452   |       |       | 0.4391   |       |       | 0.6325   |       |       |
| Atom           | AN | X        | Y     | Z     | X        | Y     | Z     | X        | Y     | Z     |
| 1              | 6  | 0.02     | -0.02 | 0.00  | -0.03    | 0.03  | -0.02 | 0.04     | -0.02 | 0.05  |
| 2              | 6  | 0.02     | -0.01 | -0.01 | -0.04    | 0.01  | 0.00  | -0.04    | 0.02  | 0.03  |
| 3              | 6  | 0.02     | 0.00  | 0.02  | -0.02    | 0.02  | -0.04 | 0.03     | -0.03 | 0.02  |
| 4              | 6  | 0.01     | 0.01  | -0.03 | 0.01     | 0.01  | 0.00  | 0.00     | -0.03 | -0.01 |
| 5              | 6  | 0.01     | 0.00  | -0.08 | 0.01     | 0.03  | 0.06  | 0.00     | -0.01 | 0.00  |
| 6              | 6  | -0.02    | 0.01  | -0.06 | 0.04     | 0.01  | 0.05  | -0.03    | 0.00  | 0.00  |
| 7              | 8  | 0.03     | -0.01 | -0.03 | -0.02    | 0.01  | 0.05  | -0.03    | 0.02  | 0.06  |
| 8              | 6  | 0.01     | 0.00  | 0.00  | -0.02    | 0.00  | 0.00  | 0.04     | -0.02 | 0.05  |
| 9              | 6  | -0.01    | 0.00  | -0.01 | 0.01     | 0.01  | 0.00  | 0.02     | 0.02  | 0.02  |
| 10             | 1  | -0.04    | -0.01 | 0.00  | 0.00     | -0.01 | 0.00  | 0.03     | 0.10  | 0.03  |
| 11             | 8  | 0.02     | -0.01 | 0.02  | 0.05     | -0.01 | 0.02  | -0.03    | 0.00  | -0.05 |
| 12             | 6  | -0.02    | -0.01 | -0.04 | 0.01     | 0.00  | -0.04 | 0.00     | -0.01 | -0.01 |
| 13             | 1  | -0.02    | 0.01  | -0.05 | -0.03    | 0.04  | -0.08 | -0.03    | -0.02 | -0.01 |
| 14             | 6  | -0.04    | 0.02  | 0.07  | 0.07     | -0.04 | -0.08 | -0.05    | 0.04  | 0.00  |
| 15             | 8  | 0.04     | 0.00  | -0.01 | -0.03    | 0.01  | 0.03  | -0.03    | -0.01 | -0.05 |
| 16             | 6  | 0.02     | -0.01 | -0.02 | -0.06    | 0.05  | 0.07  | 0.07     | 0.04  | 0.03  |
| 17             | 1  | 0.01     | -0.11 | -0.06 | -0.03    | 0.17  | 0.16  | 0.05     | 0.39  | 0.12  |
| 18             | 1  | 0.08     | 0.06  | -0.07 | -0.19    | 0.00  | 0.12  | -0.10    | -0.17 | 0.20  |
| 19             | 1  | -0.04    | 0.02  | 0.07  | 0.00     | 0.03  | 0.01  | 0.29     | -0.03 | -0.22 |
| 20             | 6  | 0.01     | -0.01 | 0.00  | -0.02    | 0.02  | -0.02 | 0.05     | -0.02 | 0.07  |
| 21             | 1  | 0.01     | -0.03 | -0.01 | -0.01    | 0.03  | -0.01 | 0.05     | -0.03 | 0.06  |
| 22             | 6  | 0.03     | -0.02 | 0.00  | -0.05    | 0.03  | -0.01 | 0.15     | -0.05 | -0.03 |
| 23             | 1  | -0.02    | -0.11 | -0.03 | -0.02    | 0.08  | 0.01  | 0.08     | -0.09 | -0.17 |
| 24             | 1  | 0.12     | 0.01  | -0.05 | -0.11    | 0.00  | 0.03  | 0.30     | -0.04 | -0.08 |
| 25             | 1  | -0.01    | 0.05  | 0.07  | -0.03    | -0.01 | -0.07 | 0.17     | -0.02 | 0.06  |
| 26             | 6  | 0.01     | 0.00  | -0.05 | 0.00     | 0.02  | 0.04  | 0.01     | 0.00  | 0.01  |
| 27             | 1  | 0.09     | -0.01 | -0.09 | -0.09    | 0.02  | 0.09  | 0.00     | -0.02 | 0.02  |
| 28             | 1  | -0.06    | -0.01 | -0.09 | 0.08     | 0.03  | 0.09  | 0.03     | 0.00  | 0.02  |
| 29             | 6  | 0.01     | 0.00  | 0.01  | -0.03    | -0.01 | -0.03 | -0.03    | -0.04 | -0.02 |
| 30             | 1  | 0.01     | 0.02  | 0.02  | -0.09    | -0.02 | 0.01  | -0.05    | -0.12 | -0.03 |
| 31             | 1  | 0.01     | 0.00  | 0.01  | -0.04    | -0.01 | -0.10 | -0.05    | 0.00  | -0.07 |
| 32             | 6  | 0.01     | 0.01  | -0.01 | -0.01    | -0.02 | 0.01  | -0.01    | -0.02 | 0.04  |
| 33             | 1  | 0.00     | 0.02  | -0.01 | 0.00     | -0.05 | 0.02  | -0.01    | -0.04 | 0.04  |
| 34             | 6  | 0.01     | 0.01  | -0.01 | -0.06    | 0.01  | -0.01 | -0.11    | 0.05  | -0.01 |
| 35             | 1  | 0.01     | 0.01  | -0.02 | -0.07    | 0.01  | -0.01 | -0.18    | 0.10  | -0.06 |
| 36             | 6  | -0.02    | 0.07  | -0.02 | 0.07     | 0.01  | -0.02 | 0.02     | -0.09 | -0.02 |
| 37             | 1  | 0.05     | 0.13  | -0.08 | 0.05     | -0.02 | 0.01  | 0.21     | -0.02 | 0.00  |
| 38             | 1  | -0.08    | 0.14  | 0.03  | 0.11     | -0.02 | -0.02 | -0.13    | 0.00  | -0.01 |

|    |   |       |       |       |       |       |       |       |       |       |
|----|---|-------|-------|-------|-------|-------|-------|-------|-------|-------|
| 39 | 1 | -0.02 | 0.00  | -0.02 | 0.07  | 0.05  | -0.05 | 0.01  | -0.30 | -0.05 |
| 40 | 6 | 0.01  | -0.01 | 0.06  | -0.01 | 0.03  | -0.08 | 0.02  | -0.01 | -0.01 |
| 41 | 1 | 0.03  | -0.08 | 0.14  | -0.02 | 0.10  | -0.15 | 0.00  | 0.01  | -0.03 |
| 42 | 6 | -0.13 | 0.00  | -0.10 | 0.13  | -0.01 | 0.07  | -0.06 | 0.02  | 0.00  |
| 43 | 1 | -0.18 | -0.02 | -0.04 | 0.16  | 0.00  | 0.03  | -0.06 | 0.02  | 0.01  |
| 44 | 1 | -0.16 | 0.00  | -0.11 | 0.16  | -0.01 | 0.06  | -0.08 | 0.02  | 0.02  |
| 45 | 1 | -0.15 | 0.01  | -0.18 | 0.13  | -0.05 | 0.13  | -0.06 | 0.05  | -0.02 |
| 46 | 6 | 0.04  | -0.01 | -0.04 | -0.03 | 0.04  | 0.02  | 0.01  | 0.00  | 0.00  |
| 47 | 1 | 0.06  | -0.04 | -0.02 | -0.06 | 0.08  | -0.01 | 0.02  | -0.01 | 0.00  |
| 48 | 6 | 0.04  | 0.02  | -0.01 | -0.05 | -0.03 | 0.02  | 0.00  | 0.02  | 0.01  |
| 49 | 1 | 0.06  | 0.05  | 0.00  | -0.06 | -0.11 | 0.03  | 0.02  | 0.03  | 0.03  |
| 50 | 1 | 0.05  | 0.00  | -0.03 | -0.11 | 0.00  | 0.05  | 0.00  | 0.02  | 0.01  |
| 51 | 6 | 0.00  | 0.01  | 0.02  | 0.03  | -0.03 | -0.03 | -0.04 | 0.02  | 0.01  |
| 52 | 1 | 0.04  | 0.02  | 0.05  | 0.00  | -0.05 | -0.06 | -0.05 | 0.03  | 0.01  |
| 53 | 6 | -0.01 | 0.01  | 0.05  | 0.02  | -0.02 | -0.06 | -0.03 | 0.02  | 0.00  |
| 54 | 1 | -0.01 | 0.01  | 0.06  | 0.02  | -0.03 | -0.08 | -0.02 | 0.03  | 0.02  |
| 55 | 6 | 0.05  | 0.00  | -0.01 | -0.05 | 0.01  | 0.02  | -0.01 | -0.01 | -0.03 |
| 56 | 1 | 0.10  | -0.01 | -0.05 | -0.11 | 0.04  | 0.07  | 0.02  | -0.03 | -0.05 |
| 57 | 6 | -0.01 | 0.01  | 0.04  | 0.05  | -0.03 | -0.04 | -0.06 | 0.02  | -0.03 |
| 58 | 1 | -0.02 | 0.01  | 0.04  | 0.06  | -0.03 | -0.03 | -0.08 | 0.03  | -0.04 |
| 59 | 8 | -0.02 | 0.08  | 0.10  | 0.02  | -0.05 | -0.11 | 0.03  | -0.05 | -0.02 |
| 60 | 8 | -0.06 | -0.04 | -0.02 | 0.07  | -0.06 | -0.09 | 0.03  | -0.01 | -0.02 |
| 61 | 8 | 0.02  | -0.03 | -0.08 | 0.02  | 0.07  | 0.07  | 0.00  | 0.00  | 0.00  |
| 62 | 6 | -0.05 | -0.01 | 0.07  | -0.01 | 0.00  | 0.02  | 0.00  | 0.02  | -0.01 |
| 63 | 6 | -0.11 | -0.02 | 0.10  | -0.10 | -0.03 | 0.08  | -0.03 | 0.03  | -0.02 |
| 64 | 6 | -0.07 | -0.10 | 0.04  | -0.07 | -0.09 | 0.02  | -0.03 | 0.03  | -0.03 |
| 65 | 8 | 0.13  | 0.04  | 0.09  | 0.09  | 0.10  | 0.03  | 0.03  | 0.03  | -0.01 |
| 66 | 1 | -0.12 | -0.21 | 0.04  | -0.12 | -0.18 | 0.01  | -0.05 | 0.04  | -0.04 |
| 67 | 6 | 0.06  | -0.06 | -0.12 | 0.07  | -0.06 | -0.12 | 0.03  | 0.00  | 0.01  |
| 68 | 1 | 0.14  | 0.09  | -0.10 | 0.14  | 0.08  | -0.10 | 0.06  | 0.00  | 0.04  |
| 69 | 1 | 0.09  | -0.10 | -0.21 | 0.10  | -0.11 | -0.20 | 0.04  | -0.07 | 0.00  |
| 70 | 1 | 0.07  | -0.14 | -0.21 | 0.08  | -0.13 | -0.20 | 0.06  | 0.04  | 0.05  |
| 71 | 6 | -0.09 | 0.06  | 0.12  | -0.09 | -0.02 | 0.09  | -0.01 | 0.04  | 0.00  |
| 72 | 1 | -0.03 | -0.04 | 0.26  | -0.03 | -0.11 | 0.17  | 0.00  | 0.03  | 0.03  |
| 73 | 1 | -0.02 | 0.26  | 0.13  | -0.04 | 0.13  | 0.10  | 0.02  | 0.06  | 0.00  |
| 74 | 1 | -0.18 | 0.03  | -0.04 | -0.18 | -0.04 | -0.01 | -0.02 | 0.03  | -0.01 |

|                |    |          |      |       |          |       |       |          |       |       |
|----------------|----|----------|------|-------|----------|-------|-------|----------|-------|-------|
|                |    | 25       |      |       | 26       |       |       | 27       |       |       |
|                |    | A        |      |       | A        |       |       | A        |       |       |
| Frequencies -- |    | 235.6898 |      |       | 256.7864 |       |       | 263.3138 |       |       |
| Red. masses -- |    | 3.6162   |      |       | 2.7698   |       |       | 2.8395   |       |       |
| Frc consts --  |    | 0.1184   |      |       | 0.1076   |       |       | 0.1160   |       |       |
| IR Inten --    |    | 5.8949   |      |       | 1.9681   |       |       | 5.1169   |       |       |
| Raman Activ -- |    | 1.6940   |      |       | 2.3888   |       |       | 2.3934   |       |       |
| Depolar (P) -- |    | 0.1916   |      |       | 0.7500   |       |       | 0.6778   |       |       |
| Depolar (U) -- |    | 0.3216   |      |       | 0.8571   |       |       | 0.8080   |       |       |
| Atom           | AN | X        | Y    | Z     | X        | Y     | Z     | X        | Y     | Z     |
| 1              | 6  | -0.02    | 0.02 | -0.03 | -0.02    | 0.01  | -0.03 | -0.05    | 0.06  | -0.06 |
| 2              | 6  | -0.05    | 0.01 | -0.01 | -0.04    | 0.02  | -0.05 | -0.06    | 0.01  | 0.02  |
| 3              | 6  | 0.01     | 0.04 | -0.02 | -0.01    | 0.00  | 0.02  | -0.03    | 0.03  | -0.02 |
| 4              | 6  | 0.03     | 0.04 | -0.01 | -0.02    | -0.01 | 0.03  | -0.02    | 0.00  | -0.01 |
| 5              | 6  | 0.04     | 0.07 | -0.09 | -0.03    | -0.05 | 0.04  | -0.01    | -0.02 | 0.02  |
| 6              | 6  | 0.02     | 0.03 | -0.07 | -0.02    | -0.03 | 0.03  | 0.00     | -0.01 | 0.01  |

|    |   |       |       |       |       |       |       |       |       |       |
|----|---|-------|-------|-------|-------|-------|-------|-------|-------|-------|
| 7  | 8 | 0.01  | -0.02 | 0.06  | 0.04  | -0.02 | -0.03 | -0.02 | -0.01 | 0.17  |
| 8  | 6 | -0.03 | -0.01 | -0.01 | 0.04  | -0.05 | 0.01  | 0.01  | 0.01  | 0.00  |
| 9  | 6 | 0.04  | -0.02 | 0.01  | 0.01  | -0.04 | -0.02 | -0.03 | 0.02  | -0.02 |
| 10 | 1 | 0.02  | -0.09 | 0.01  | 0.00  | -0.08 | -0.02 | -0.06 | -0.03 | 0.00  |
| 11 | 8 | 0.13  | -0.04 | 0.06  | 0.08  | -0.06 | 0.00  | 0.04  | 0.02  | 0.04  |
| 12 | 6 | 0.06  | 0.02  | 0.04  | 0.01  | -0.01 | 0.00  | -0.04 | 0.02  | -0.02 |
| 13 | 1 | 0.09  | 0.01  | 0.05  | 0.04  | -0.01 | 0.00  | -0.04 | 0.01  | -0.01 |
| 14 | 6 | -0.01 | -0.02 | 0.04  | -0.02 | -0.01 | 0.03  | 0.02  | -0.02 | 0.00  |
| 15 | 8 | 0.04  | 0.00  | 0.02  | 0.02  | 0.01  | 0.00  | 0.01  | 0.01  | 0.02  |
| 16 | 6 | -0.11 | 0.10  | 0.13  | 0.03  | 0.07  | 0.06  | 0.05  | 0.03  | -0.03 |
| 17 | 1 | -0.05 | 0.22  | 0.26  | 0.03  | 0.05  | 0.06  | 0.01  | -0.03 | -0.11 |
| 18 | 1 | -0.30 | 0.07  | 0.16  | -0.01 | 0.17  | -0.01 | 0.12  | 0.11  | -0.10 |
| 19 | 1 | -0.03 | 0.10  | 0.12  | 0.08  | 0.12  | 0.18  | 0.07  | 0.06  | 0.06  |
| 20 | 6 | -0.03 | 0.01  | -0.03 | 0.00  | -0.02 | -0.04 | -0.02 | 0.05  | -0.05 |
| 21 | 1 | -0.04 | 0.04  | -0.01 | 0.04  | 0.00  | -0.06 | 0.02  | 0.08  | -0.07 |
| 22 | 6 | -0.01 | 0.00  | -0.06 | 0.02  | 0.14  | 0.00  | 0.05  | -0.03 | -0.19 |
| 23 | 1 | 0.00  | 0.03  | -0.08 | 0.05  | 0.19  | 0.02  | 0.10  | 0.19  | -0.30 |
| 24 | 1 | -0.02 | -0.03 | -0.03 | -0.02 | 0.23  | -0.06 | -0.05 | -0.17 | -0.04 |
| 25 | 1 | 0.01  | -0.03 | -0.10 | 0.09  | 0.13  | 0.08  | 0.18  | -0.21 | -0.37 |
| 26 | 6 | 0.02  | 0.04  | 0.05  | -0.01 | -0.03 | -0.02 | -0.02 | -0.01 | -0.03 |
| 27 | 1 | -0.05 | -0.04 | 0.13  | 0.03  | 0.00  | -0.06 | 0.03  | 0.03  | -0.08 |
| 28 | 1 | 0.09  | 0.13  | 0.13  | -0.05 | -0.07 | -0.06 | -0.07 | -0.04 | -0.08 |
| 29 | 6 | -0.05 | -0.03 | -0.04 | 0.02  | -0.06 | -0.03 | 0.09  | 0.04  | 0.05  |
| 30 | 1 | -0.18 | -0.04 | 0.05  | -0.03 | -0.09 | 0.00  | 0.17  | 0.12  | 0.02  |
| 31 | 1 | -0.07 | -0.03 | -0.18 | 0.00  | -0.05 | -0.09 | 0.13  | -0.01 | 0.16  |
| 32 | 6 | -0.01 | -0.05 | 0.02  | 0.04  | -0.05 | 0.01  | 0.00  | -0.05 | 0.04  |
| 33 | 1 | 0.03  | -0.09 | 0.04  | 0.10  | -0.08 | 0.04  | 0.05  | -0.13 | 0.07  |
| 34 | 6 | -0.09 | 0.01  | -0.04 | -0.10 | 0.06  | -0.09 | -0.03 | -0.04 | 0.04  |
| 35 | 1 | -0.11 | 0.02  | -0.05 | -0.17 | 0.10  | -0.13 | 0.03  | -0.08 | 0.07  |
| 36 | 6 | -0.05 | 0.00  | 0.01  | -0.06 | 0.06  | 0.05  | 0.03  | -0.04 | -0.03 |
| 37 | 1 | -0.04 | 0.01  | 0.01  | -0.31 | -0.02 | 0.04  | 0.24  | 0.04  | -0.03 |
| 38 | 1 | -0.10 | 0.02  | -0.02 | 0.11  | -0.05 | 0.02  | -0.14 | 0.07  | 0.01  |
| 39 | 1 | -0.05 | -0.04 | 0.04  | -0.05 | 0.32  | 0.12  | 0.01  | -0.27 | -0.07 |
| 40 | 6 | 0.01  | 0.05  | -0.02 | 0.00  | -0.01 | 0.01  | -0.02 | 0.00  | 0.01  |
| 41 | 1 | 0.00  | 0.07  | -0.04 | 0.01  | 0.00  | 0.01  | -0.01 | -0.02 | 0.04  |
| 42 | 6 | -0.07 | -0.07 | -0.14 | 0.00  | 0.04  | 0.06  | 0.02  | 0.02  | 0.02  |
| 43 | 1 | -0.05 | -0.21 | -0.08 | 0.00  | 0.11  | 0.03  | 0.00  | 0.05  | 0.01  |
| 44 | 1 | -0.16 | -0.08 | -0.26 | 0.03  | 0.05  | 0.13  | 0.05  | 0.02  | 0.05  |
| 45 | 1 | -0.05 | -0.02 | -0.14 | 0.00  | 0.04  | 0.05  | 0.01  | -0.01 | 0.01  |
| 46 | 6 | 0.01  | 0.01  | -0.03 | -0.02 | -0.05 | 0.03  | -0.01 | -0.02 | 0.02  |
| 47 | 1 | -0.02 | 0.00  | 0.00  | -0.01 | -0.07 | 0.06  | -0.01 | -0.04 | 0.03  |
| 48 | 6 | -0.04 | -0.04 | 0.06  | 0.07  | 0.05  | -0.10 | 0.03  | 0.01  | -0.06 |
| 49 | 1 | -0.02 | -0.15 | 0.13  | 0.02  | 0.24  | -0.23 | 0.00  | 0.10  | -0.13 |
| 50 | 1 | -0.16 | 0.02  | 0.10  | 0.26  | -0.06 | -0.19 | 0.14  | -0.04 | -0.10 |
| 51 | 6 | 0.02  | -0.02 | 0.00  | -0.01 | 0.01  | 0.01  | 0.01  | 0.00  | -0.01 |
| 52 | 1 | 0.07  | -0.07 | -0.02 | -0.02 | 0.08  | 0.07  | 0.01  | 0.03  | 0.02  |
| 53 | 6 | 0.00  | -0.01 | 0.02  | -0.02 | -0.01 | 0.01  | 0.01  | -0.01 | -0.01 |
| 54 | 1 | -0.02 | -0.02 | 0.02  | -0.03 | -0.01 | 0.01  | 0.00  | -0.02 | -0.02 |
| 55 | 6 | 0.03  | 0.00  | 0.01  | 0.01  | 0.01  | -0.01 | 0.00  | 0.01  | 0.01  |
| 56 | 1 | 0.04  | 0.02  | -0.02 | 0.03  | 0.01  | -0.03 | -0.01 | 0.02  | 0.02  |
| 57 | 6 | 0.02  | -0.01 | 0.05  | 0.00  | -0.01 | 0.03  | 0.03  | -0.01 | 0.01  |
| 58 | 1 | 0.03  | -0.02 | 0.06  | 0.01  | -0.01 | 0.04  | 0.04  | -0.02 | 0.02  |

|    |   |       |       |       |       |       |       |       |       |       |
|----|---|-------|-------|-------|-------|-------|-------|-------|-------|-------|
| 59 | 8 | 0.04  | 0.02  | -0.03 | 0.01  | -0.02 | 0.01  | -0.01 | 0.05  | 0.02  |
| 60 | 8 | 0.00  | 0.02  | 0.07  | 0.03  | 0.00  | 0.00  | -0.07 | 0.02  | 0.00  |
| 61 | 8 | 0.05  | -0.02 | -0.10 | -0.08 | -0.06 | 0.01  | -0.03 | -0.03 | 0.01  |
| 62 | 6 | 0.00  | -0.02 | 0.01  | 0.00  | 0.01  | 0.00  | -0.01 | 0.00  | -0.01 |
| 63 | 6 | 0.03  | 0.00  | -0.01 | -0.01 | 0.01  | -0.01 | 0.01  | -0.02 | 0.01  |
| 64 | 6 | 0.02  | 0.01  | 0.00  | -0.01 | 0.01  | -0.01 | 0.03  | -0.03 | 0.02  |
| 65 | 8 | -0.04 | -0.07 | 0.01  | 0.00  | 0.01  | 0.00  | 0.00  | 0.00  | 0.00  |
| 66 | 1 | 0.04  | 0.03  | 0.01  | -0.02 | 0.02  | -0.02 | 0.04  | -0.04 | 0.04  |
| 67 | 6 | -0.03 | 0.01  | 0.03  | 0.01  | 0.00  | 0.00  | -0.02 | 0.00  | -0.01 |
| 68 | 1 | -0.06 | -0.03 | 0.01  | 0.02  | 0.00  | 0.01  | -0.04 | 0.01  | -0.03 |
| 69 | 1 | -0.04 | 0.04  | 0.05  | 0.02  | -0.02 | -0.01 | -0.02 | 0.06  | 0.00  |
| 70 | 1 | -0.04 | 0.02  | 0.04  | 0.02  | 0.01  | 0.01  | -0.04 | -0.04 | -0.05 |
| 71 | 6 | 0.02  | -0.01 | -0.02 | -0.01 | 0.00  | -0.01 | 0.01  | -0.03 | 0.00  |
| 72 | 1 | 0.01  | 0.01  | -0.05 | -0.01 | 0.00  | -0.01 | 0.00  | -0.01 | -0.02 |
| 73 | 1 | 0.00  | -0.06 | -0.02 | -0.01 | 0.00  | -0.01 | -0.01 | -0.05 | 0.00  |
| 74 | 1 | 0.05  | -0.01 | 0.01  | -0.01 | 0.00  | 0.00  | 0.02  | -0.02 | 0.02  |

|                |  |          |  |          |  |          |
|----------------|--|----------|--|----------|--|----------|
|                |  | 28       |  | 29       |  | 30       |
|                |  | A        |  | A        |  | A        |
| Frequencies -- |  | 264.5908 |  | 273.0244 |  | 283.3902 |
| Red. masses -- |  | 3.3789   |  | 3.0364   |  | 2.6892   |
| Frc consts --  |  | 0.1394   |  | 0.1334   |  | 0.1272   |
| IR Inten --    |  | 4.0022   |  | 0.9783   |  | 0.5734   |
| Raman Activ -- |  | 1.0531   |  | 2.1179   |  | 0.7349   |
| Depolar (P) -- |  | 0.6851   |  | 0.7367   |  | 0.7491   |
| Depolar (U) -- |  | 0.8131   |  | 0.8484   |  | 0.8565   |

| Atom | AN | X     | Y     | Z     | X     | Y     | Z     | X     | Y     | Z     |
|------|----|-------|-------|-------|-------|-------|-------|-------|-------|-------|
| 1    | 6  | -0.01 | 0.02  | -0.01 | -0.05 | 0.00  | -0.01 | -0.01 | 0.03  | 0.00  |
| 2    | 6  | 0.00  | 0.02  | 0.01  | -0.02 | 0.01  | -0.02 | 0.03  | 0.03  | 0.00  |
| 3    | 6  | -0.01 | 0.00  | -0.04 | -0.07 | -0.01 | -0.04 | -0.03 | 0.05  | -0.03 |
| 4    | 6  | 0.05  | -0.02 | -0.04 | -0.03 | -0.01 | -0.04 | 0.01  | 0.02  | 0.01  |
| 5    | 6  | 0.04  | -0.06 | 0.01  | -0.01 | 0.02  | -0.03 | -0.01 | 0.00  | 0.02  |
| 6    | 6  | -0.03 | -0.05 | 0.02  | 0.00  | 0.00  | -0.02 | -0.01 | 0.00  | 0.01  |
| 7    | 8  | -0.02 | 0.03  | 0.04  | 0.04  | -0.01 | -0.02 | 0.04  | 0.03  | 0.02  |
| 8    | 6  | -0.01 | 0.02  | -0.02 | 0.06  | -0.02 | 0.03  | 0.01  | 0.02  | -0.03 |
| 9    | 6  | 0.04  | 0.02  | 0.00  | 0.00  | -0.02 | 0.00  | 0.07  | 0.03  | 0.01  |
| 10   | 1  | 0.05  | -0.01 | -0.01 | 0.00  | 0.00  | 0.00  | 0.12  | 0.06  | -0.01 |
| 11   | 8  | 0.10  | 0.01  | 0.04  | 0.00  | -0.02 | -0.02 | 0.03  | 0.03  | -0.06 |
| 12   | 6  | 0.04  | 0.01  | 0.02  | 0.00  | -0.02 | 0.00  | 0.06  | 0.02  | 0.04  |
| 13   | 1  | 0.03  | -0.02 | 0.04  | 0.01  | -0.03 | 0.02  | 0.06  | 0.02  | 0.04  |
| 14   | 6  | -0.07 | 0.04  | -0.02 | 0.06  | 0.01  | -0.01 | -0.04 | -0.05 | 0.04  |
| 15   | 8  | -0.07 | -0.01 | -0.09 | 0.01  | 0.00  | 0.04  | 0.03  | 0.01  | 0.01  |
| 16   | 6  | -0.05 | 0.03  | 0.04  | 0.14  | 0.05  | -0.05 | -0.02 | -0.02 | -0.02 |
| 17   | 1  | -0.02 | 0.06  | 0.10  | 0.07  | 0.25  | -0.08 | 0.01  | 0.15  | 0.08  |
| 18   | 1  | -0.12 | 0.02  | 0.05  | 0.10  | -0.04 | 0.03  | -0.11 | -0.18 | 0.11  |
| 19   | 1  | -0.05 | 0.03  | 0.02  | 0.31  | 0.02  | -0.17 | 0.02  | -0.08 | -0.21 |
| 20   | 6  | -0.01 | 0.03  | -0.02 | 0.02  | -0.01 | 0.00  | 0.03  | 0.03  | 0.01  |
| 21   | 1  | -0.02 | 0.04  | 0.00  | 0.07  | 0.01  | -0.03 | 0.01  | 0.05  | 0.04  |
| 22   | 6  | -0.04 | 0.04  | 0.02  | -0.04 | 0.11  | 0.02  | -0.11 | -0.05 | 0.02  |
| 23   | 1  | -0.02 | 0.06  | 0.06  | -0.04 | 0.09  | 0.03  | -0.18 | -0.23 | 0.03  |
| 24   | 1  | -0.10 | 0.03  | 0.04  | 0.00  | 0.21  | -0.07 | 0.02  | -0.06 | -0.01 |
| 25   | 1  | -0.04 | 0.02  | -0.01 | -0.01 | 0.16  | 0.15  | -0.25 | 0.06  | 0.05  |
| 26   | 6  | -0.03 | -0.06 | -0.05 | -0.07 | -0.01 | -0.05 | -0.04 | 0.01  | 0.02  |

|    |   |       |       |       |       |       |       |       |       |       |
|----|---|-------|-------|-------|-------|-------|-------|-------|-------|-------|
| 27 | 1 | 0.05  | -0.01 | -0.12 | -0.02 | 0.05  | -0.10 | -0.06 | 0.00  | 0.04  |
| 28 | 1 | -0.11 | -0.13 | -0.12 | -0.15 | -0.03 | -0.10 | -0.03 | 0.02  | 0.04  |
| 29 | 6 | 0.01  | 0.02  | -0.02 | 0.01  | -0.03 | 0.00  | -0.03 | 0.01  | -0.07 |
| 30 | 1 | -0.04 | 0.04  | 0.02  | 0.00  | -0.07 | -0.01 | -0.08 | -0.04 | -0.04 |
| 31 | 1 | 0.01  | 0.00  | -0.07 | -0.01 | 0.00  | -0.02 | -0.04 | 0.02  | -0.15 |
| 32 | 6 | -0.01 | 0.00  | -0.01 | 0.05  | -0.01 | 0.02  | 0.03  | 0.02  | -0.02 |
| 33 | 1 | -0.01 | 0.00  | -0.02 | 0.09  | -0.04 | 0.05  | 0.03  | 0.01  | -0.02 |
| 34 | 6 | -0.01 | 0.00  | 0.00  | -0.04 | 0.05  | -0.03 | 0.06  | 0.00  | 0.01  |
| 35 | 1 | -0.01 | -0.01 | 0.01  | -0.07 | 0.07  | -0.05 | 0.08  | -0.04 | 0.05  |
| 36 | 6 | 0.18  | -0.06 | -0.07 | -0.05 | -0.09 | -0.04 | 0.00  | -0.08 | 0.00  |
| 37 | 1 | -0.05 | -0.22 | 0.05  | 0.03  | -0.08 | -0.02 | 0.21  | -0.01 | 0.01  |
| 38 | 1 | 0.49  | -0.25 | -0.12 | -0.14 | -0.06 | -0.08 | -0.20 | 0.02  | 0.00  |
| 39 | 1 | 0.21  | 0.26  | -0.15 | -0.06 | -0.20 | -0.03 | -0.02 | -0.33 | -0.01 |
| 40 | 6 | -0.03 | -0.05 | 0.04  | -0.09 | -0.06 | 0.04  | -0.04 | 0.03  | 0.01  |
| 41 | 1 | -0.02 | -0.12 | 0.13  | -0.08 | -0.13 | 0.12  | -0.03 | 0.00  | 0.03  |
| 42 | 6 | -0.03 | -0.01 | 0.04  | 0.08  | -0.06 | -0.02 | 0.03  | -0.04 | 0.01  |
| 43 | 1 | -0.08 | 0.09  | 0.04  | 0.05  | 0.01  | -0.03 | 0.05  | -0.05 | -0.01 |
| 44 | 1 | 0.07  | 0.00  | 0.11  | 0.22  | -0.05 | -0.05 | 0.06  | -0.04 | -0.03 |
| 45 | 1 | -0.06 | -0.08 | 0.00  | 0.06  | -0.20 | 0.01  | 0.03  | -0.07 | 0.05  |
| 46 | 6 | 0.08  | -0.02 | -0.03 | 0.00  | 0.03  | -0.03 | -0.04 | -0.04 | 0.04  |
| 47 | 1 | 0.13  | 0.01  | -0.11 | 0.02  | 0.05  | -0.07 | -0.06 | -0.07 | 0.11  |
| 48 | 6 | 0.05  | -0.01 | 0.02  | -0.07 | -0.04 | 0.08  | 0.04  | 0.03  | -0.08 |
| 49 | 1 | 0.09  | 0.01  | 0.06  | -0.04 | -0.22 | 0.19  | -0.01 | 0.20  | -0.21 |
| 50 | 1 | 0.04  | -0.01 | 0.02  | -0.24 | 0.05  | 0.16  | 0.22  | -0.05 | -0.15 |
| 51 | 6 | -0.04 | 0.01  | 0.00  | 0.02  | -0.01 | -0.01 | -0.01 | 0.00  | 0.01  |
| 52 | 1 | -0.08 | 0.02  | 0.00  | 0.02  | -0.06 | -0.05 | 0.02  | 0.05  | 0.07  |
| 53 | 6 | -0.06 | 0.03  | -0.03 | 0.06  | 0.00  | 0.01  | -0.05 | -0.03 | 0.00  |
| 54 | 1 | -0.05 | 0.03  | -0.01 | 0.08  | 0.01  | 0.02  | -0.08 | -0.04 | -0.02 |
| 55 | 6 | -0.04 | -0.01 | -0.07 | 0.02  | 0.00  | 0.05  | 0.00  | 0.01  | -0.03 |
| 56 | 1 | -0.01 | -0.04 | -0.08 | -0.01 | 0.00  | 0.09  | 0.03  | 0.04  | -0.07 |
| 57 | 6 | -0.10 | 0.02  | -0.06 | 0.05  | 0.01  | 0.00  | 0.00  | -0.03 | 0.05  |
| 58 | 1 | -0.12 | 0.03  | -0.08 | 0.04  | 0.01  | -0.01 | 0.02  | -0.04 | 0.09  |
| 59 | 8 | -0.04 | 0.08  | 0.07  | -0.11 | 0.07  | 0.06  | -0.05 | 0.08  | 0.01  |
| 60 | 8 | 0.00  | 0.01  | 0.05  | -0.01 | 0.00  | 0.02  | 0.09  | 0.00  | 0.03  |
| 61 | 8 | 0.11  | 0.01  | 0.05  | 0.03  | 0.05  | 0.00  | -0.05 | -0.07 | -0.02 |
| 62 | 6 | 0.00  | -0.01 | 0.02  | 0.00  | -0.01 | 0.01  | 0.03  | 0.01  | 0.01  |
| 63 | 6 | 0.00  | -0.01 | 0.01  | 0.00  | 0.00  | 0.00  | -0.01 | 0.01  | 0.01  |
| 64 | 6 | 0.00  | -0.01 | 0.01  | 0.00  | 0.00  | 0.00  | -0.02 | 0.02  | -0.01 |
| 65 | 8 | -0.02 | -0.05 | 0.02  | 0.00  | -0.02 | 0.01  | -0.01 | 0.01  | 0.00  |
| 66 | 1 | 0.01  | -0.02 | 0.01  | 0.00  | 0.00  | 0.00  | -0.05 | 0.00  | -0.02 |
| 67 | 6 | -0.01 | -0.01 | 0.00  | 0.00  | 0.00  | 0.01  | 0.05  | 0.01  | -0.02 |
| 68 | 1 | -0.02 | -0.02 | 0.00  | -0.01 | -0.01 | 0.01  | 0.08  | 0.04  | 0.00  |
| 69 | 1 | -0.02 | 0.01  | 0.01  | -0.01 | -0.01 | 0.01  | 0.06  | -0.04 | -0.06 |
| 70 | 1 | -0.02 | -0.01 | 0.00  | 0.00  | 0.00  | 0.01  | 0.06  | 0.01  | -0.02 |
| 71 | 6 | 0.00  | 0.00  | 0.01  | 0.00  | 0.01  | 0.00  | -0.04 | -0.06 | -0.01 |
| 72 | 1 | 0.00  | 0.00  | 0.01  | 0.01  | 0.01  | 0.02  | 0.00  | -0.11 | -0.04 |
| 73 | 1 | 0.01  | 0.01  | 0.01  | 0.01  | 0.03  | 0.00  | -0.05 | -0.06 | 0.00  |
| 74 | 1 | 0.00  | 0.00  | 0.00  | 0.00  | 0.01  | -0.01 | -0.10 | -0.08 | 0.01  |

|                |          |          |          |
|----------------|----------|----------|----------|
|                | 31       | 32       | 33       |
|                | A        | A        | A        |
| Frequencies -- | 290.8136 | 299.8353 | 304.4651 |
| Red. masses -- | 2.6560   | 1.5521   | 2.0034   |

|             |    |        |        |        |
|-------------|----|--------|--------|--------|
| Frc consts  | -- | 0.1323 | 0.0822 | 0.1094 |
| IR Inten    | -- | 3.7161 | 0.2177 | 1.6400 |
| Raman Activ | -- | 2.1039 | 0.9211 | 1.2136 |
| Depolar (P) | -- | 0.7480 | 0.6075 | 0.2430 |
| Depolar (U) | -- | 0.8558 | 0.7559 | 0.3910 |

| Atom | AN | X     | Y     | Z     | X     | Y     | Z     | X     | Y     | Z     |
|------|----|-------|-------|-------|-------|-------|-------|-------|-------|-------|
| 1    | 6  | 0.00  | -0.01 | 0.02  | 0.01  | 0.01  | 0.00  | 0.00  | -0.02 | 0.00  |
| 2    | 6  | 0.00  | 0.00  | 0.00  | 0.01  | 0.01  | 0.00  | -0.02 | -0.02 | 0.00  |
| 3    | 6  | -0.01 | 0.04  | -0.01 | 0.01  | 0.01  | 0.01  | 0.00  | 0.02  | 0.01  |
| 4    | 6  | 0.00  | 0.03  | 0.01  | 0.00  | 0.00  | 0.02  | 0.00  | 0.02  | 0.01  |
| 5    | 6  | 0.00  | -0.01 | 0.04  | -0.01 | -0.02 | 0.00  | -0.01 | 0.01  | 0.00  |
| 6    | 6  | -0.01 | -0.01 | 0.03  | 0.00  | -0.03 | 0.00  | 0.00  | 0.01  | -0.01 |
| 7    | 8  | 0.02  | -0.01 | -0.03 | -0.01 | 0.02  | 0.01  | 0.01  | -0.04 | 0.00  |
| 8    | 6  | 0.03  | -0.01 | 0.02  | -0.01 | 0.00  | -0.02 | 0.00  | 0.00  | 0.03  |
| 9    | 6  | -0.02 | 0.00  | 0.00  | 0.01  | 0.00  | -0.01 | -0.02 | 0.00  | 0.02  |
| 10   | 1  | -0.08 | 0.02  | 0.03  | 0.02  | -0.01 | -0.01 | -0.01 | 0.01  | 0.02  |
| 11   | 8  | 0.07  | -0.03 | 0.05  | 0.02  | 0.00  | -0.02 | -0.04 | 0.00  | 0.02  |
| 12   | 6  | -0.04 | 0.02  | -0.03 | 0.01  | 0.00  | 0.00  | -0.01 | 0.02  | 0.02  |
| 13   | 1  | -0.02 | 0.03  | -0.04 | 0.01  | 0.01  | -0.01 | 0.01  | 0.01  | 0.03  |
| 14   | 6  | 0.01  | -0.01 | -0.02 | -0.04 | 0.04  | 0.03  | -0.04 | 0.00  | 0.04  |
| 15   | 8  | -0.01 | 0.00  | 0.00  | 0.00  | -0.01 | -0.03 | 0.02  | 0.00  | -0.01 |
| 16   | 6  | 0.07  | 0.01  | -0.04 | -0.04 | -0.01 | 0.02  | 0.04  | 0.00  | -0.02 |
| 17   | 1  | 0.04  | 0.19  | -0.03 | -0.01 | -0.07 | 0.04  | 0.01  | 0.05  | -0.06 |
| 18   | 1  | 0.02  | -0.12 | 0.06  | -0.05 | 0.03  | -0.01 | 0.06  | -0.03 | 0.00  |
| 19   | 1  | 0.18  | -0.04 | -0.20 | -0.09 | 0.00  | 0.06  | 0.09  | -0.01 | -0.07 |
| 20   | 6  | 0.02  | -0.02 | 0.03  | 0.00  | 0.01  | -0.02 | 0.00  | -0.01 | 0.02  |
| 21   | 1  | 0.04  | -0.04 | 0.01  | -0.01 | 0.01  | 0.00  | 0.01  | 0.00  | 0.02  |
| 22   | 6  | -0.03 | -0.04 | 0.03  | 0.00  | 0.00  | 0.00  | 0.06  | -0.05 | -0.06 |
| 23   | 1  | -0.12 | -0.22 | 0.00  | 0.03  | 0.07  | 0.03  | -0.03 | -0.18 | -0.17 |
| 24   | 1  | 0.14  | 0.00  | -0.06 | -0.08 | -0.03 | 0.05  | 0.24  | -0.03 | -0.13 |
| 25   | 1  | -0.13 | 0.09  | 0.14  | 0.02  | -0.05 | -0.07 | 0.03  | 0.03  | 0.05  |
| 26   | 6  | -0.01 | 0.00  | -0.02 | 0.01  | -0.03 | -0.05 | 0.00  | 0.01  | -0.03 |
| 27   | 1  | -0.03 | 0.03  | -0.03 | 0.07  | 0.01  | -0.10 | 0.01  | 0.03  | -0.05 |
| 28   | 1  | 0.04  | -0.05 | -0.02 | -0.02 | -0.10 | -0.10 | 0.00  | -0.02 | -0.05 |
| 29   | 6  | -0.05 | -0.03 | -0.01 | 0.01  | 0.00  | -0.02 | -0.01 | 0.00  | 0.03  |
| 30   | 1  | -0.16 | -0.08 | 0.06  | 0.02  | 0.01  | -0.02 | 0.00  | 0.00  | 0.02  |
| 31   | 1  | -0.09 | 0.02  | -0.13 | 0.02  | -0.01 | -0.02 | -0.02 | 0.01  | 0.05  |
| 32   | 6  | 0.02  | -0.01 | 0.01  | 0.00  | 0.00  | -0.02 | -0.01 | -0.01 | 0.03  |
| 33   | 1  | 0.04  | -0.02 | 0.02  | 0.00  | 0.00  | -0.02 | 0.00  | -0.01 | 0.04  |
| 34   | 6  | 0.00  | 0.01  | 0.00  | 0.00  | 0.00  | 0.00  | 0.00  | -0.01 | 0.01  |
| 35   | 1  | -0.01 | 0.02  | -0.01 | 0.00  | -0.01 | 0.00  | 0.02  | -0.01 | 0.01  |
| 36   | 6  | 0.11  | 0.14  | -0.01 | -0.06 | 0.04  | 0.03  | 0.03  | 0.07  | 0.01  |
| 37   | 1  | 0.26  | 0.25  | -0.09 | 0.13  | 0.17  | -0.06 | -0.25 | -0.05 | 0.05  |
| 38   | 1  | 0.04  | 0.25  | 0.14  | -0.26 | 0.19  | 0.10  | 0.30  | -0.09 | -0.02 |
| 39   | 1  | 0.10  | 0.03  | -0.08 | -0.08 | -0.19 | 0.06  | 0.06  | 0.40  | 0.01  |
| 40   | 6  | 0.00  | 0.06  | -0.08 | 0.03  | 0.00  | -0.02 | 0.01  | 0.04  | -0.04 |
| 41   | 1  | 0.03  | 0.10  | -0.11 | 0.05  | 0.03  | -0.04 | 0.02  | 0.06  | -0.05 |
| 42   | 6  | -0.01 | -0.07 | 0.00  | 0.07  | -0.06 | 0.01  | 0.07  | -0.08 | -0.03 |
| 43   | 1  | 0.03  | -0.17 | 0.02  | -0.15 | 0.26  | 0.04  | -0.04 | 0.04  | 0.00  |
| 44   | 1  | -0.08 | -0.08 | -0.08 | 0.52  | -0.03 | 0.09  | 0.32  | -0.07 | -0.07 |
| 45   | 1  | 0.01  | -0.03 | 0.04  | -0.06 | -0.46 | -0.08 | 0.00  | -0.33 | -0.04 |
| 46   | 6  | -0.01 | -0.01 | 0.04  | 0.01  | 0.00  | -0.01 | -0.01 | 0.01  | -0.01 |

|    |   |       |       |       |       |       |       |       |       |       |
|----|---|-------|-------|-------|-------|-------|-------|-------|-------|-------|
| 47 | 1 | -0.02 | -0.01 | 0.03  | 0.03  | 0.00  | -0.03 | -0.01 | 0.02  | -0.01 |
| 48 | 6 | 0.02  | 0.01  | -0.03 | -0.01 | -0.01 | 0.02  | -0.02 | 0.00  | 0.01  |
| 49 | 1 | 0.00  | 0.09  | -0.10 | 0.01  | -0.03 | 0.05  | -0.01 | -0.02 | 0.02  |
| 50 | 1 | 0.12  | -0.03 | -0.06 | -0.04 | 0.01  | 0.03  | -0.04 | 0.01  | 0.02  |
| 51 | 6 | 0.00  | 0.00  | 0.00  | -0.01 | 0.00  | 0.01  | -0.01 | 0.01  | 0.00  |
| 52 | 1 | -0.02 | 0.02  | 0.01  | -0.01 | -0.01 | 0.00  | 0.03  | -0.01 | 0.01  |
| 53 | 6 | 0.00  | -0.01 | -0.02 | -0.02 | 0.02  | 0.04  | -0.03 | 0.00  | 0.03  |
| 54 | 1 | 0.00  | -0.01 | -0.03 | -0.01 | 0.03  | 0.06  | -0.04 | 0.00  | 0.03  |
| 55 | 6 | -0.02 | 0.00  | 0.00  | 0.02  | -0.01 | -0.02 | 0.02  | 0.00  | -0.02 |
| 56 | 1 | -0.03 | 0.01  | 0.01  | 0.06  | -0.03 | -0.04 | 0.05  | 0.00  | -0.06 |
| 57 | 6 | 0.01  | -0.01 | -0.01 | -0.05 | 0.02  | 0.01  | -0.03 | 0.00  | 0.03  |
| 58 | 1 | 0.02  | -0.01 | -0.01 | -0.06 | 0.03  | 0.00  | -0.03 | 0.00  | 0.04  |
| 59 | 8 | -0.04 | 0.02  | -0.07 | 0.02  | -0.02 | -0.02 | -0.03 | 0.01  | -0.03 |
| 60 | 8 | -0.11 | 0.01  | 0.01  | 0.02  | -0.02 | -0.01 | -0.02 | 0.04  | 0.03  |
| 61 | 8 | 0.00  | -0.01 | 0.05  | 0.00  | 0.01  | 0.01  | 0.00  | 0.02  | 0.00  |
| 62 | 6 | -0.04 | -0.02 | 0.00  | 0.00  | -0.01 | 0.01  | 0.01  | 0.02  | 0.00  |
| 63 | 6 | 0.01  | -0.02 | 0.00  | -0.01 | 0.00  | 0.00  | 0.01  | 0.01  | 0.01  |
| 64 | 6 | 0.04  | -0.04 | 0.02  | -0.01 | -0.01 | -0.01 | 0.00  | 0.03  | 0.01  |
| 65 | 8 | 0.01  | -0.06 | 0.01  | 0.01  | -0.01 | 0.01  | -0.02 | 0.01  | 0.00  |
| 66 | 1 | 0.08  | -0.03 | 0.05  | 0.00  | 0.00  | 0.00  | -0.03 | 0.02  | -0.01 |
| 67 | 6 | -0.07 | -0.02 | 0.03  | -0.02 | -0.02 | 0.02  | 0.06  | 0.04  | -0.03 |
| 68 | 1 | -0.13 | -0.06 | 0.00  | -0.03 | -0.04 | 0.01  | 0.09  | 0.08  | -0.01 |
| 69 | 1 | -0.09 | 0.07  | 0.08  | -0.03 | -0.01 | 0.03  | 0.08  | 0.00  | -0.07 |
| 70 | 1 | -0.11 | -0.04 | 0.02  | -0.02 | 0.00  | 0.03  | 0.07  | 0.02  | -0.05 |
| 71 | 6 | 0.05  | 0.09  | 0.02  | 0.02  | 0.06  | 0.01  | -0.04 | -0.12 | -0.02 |
| 72 | 1 | -0.03 | 0.19  | 0.05  | -0.02 | 0.11  | 0.04  | 0.04  | -0.23 | -0.08 |
| 73 | 1 | 0.06  | 0.04  | 0.00  | 0.02  | 0.06  | 0.01  | -0.06 | -0.10 | -0.01 |
| 74 | 1 | 0.18  | 0.13  | 0.03  | 0.07  | 0.08  | -0.01 | -0.17 | -0.16 | 0.01  |

34

35

36

A

A

A

|                |          |          |          |
|----------------|----------|----------|----------|
| Frequencies -- | 306.2399 | 320.9867 | 324.1703 |
| Red. masses -- | 2.1620   | 2.0068   | 2.1021   |
| Frc consts --  | 0.1195   | 0.1218   | 0.1302   |
| IR Inten --    | 1.5054   | 1.8910   | 4.1999   |
| Raman Activ -- | 1.1169   | 0.8388   | 2.4290   |
| Depolar (P) -- | 0.2787   | 0.6886   | 0.7471   |
| Depolar (U) -- | 0.4359   | 0.8156   | 0.8552   |

| Atom | AN | X     | Y     | Z     | X     | Y     | Z     | X     | Y     | Z     |
|------|----|-------|-------|-------|-------|-------|-------|-------|-------|-------|
| 1    | 6  | 0.02  | 0.00  | 0.02  | 0.00  | -0.02 | 0.01  | -0.02 | -0.01 | -0.01 |
| 2    | 6  | 0.01  | 0.01  | 0.00  | 0.01  | -0.03 | 0.00  | -0.02 | -0.03 | -0.01 |
| 3    | 6  | 0.01  | -0.01 | 0.00  | 0.00  | -0.02 | -0.01 | -0.01 | -0.01 | 0.00  |
| 4    | 6  | 0.00  | 0.00  | -0.01 | 0.02  | -0.01 | -0.02 | 0.02  | 0.00  | 0.01  |
| 5    | 6  | 0.00  | -0.03 | 0.01  | 0.03  | 0.03  | -0.01 | 0.03  | 0.00  | 0.00  |
| 6    | 6  | -0.01 | -0.04 | 0.02  | 0.03  | 0.06  | -0.02 | 0.02  | 0.02  | -0.02 |
| 7    | 8  | -0.01 | 0.02  | -0.03 | 0.00  | -0.02 | -0.04 | -0.01 | -0.04 | -0.02 |
| 8    | 6  | 0.00  | -0.01 | 0.00  | 0.00  | -0.01 | 0.02  | -0.01 | 0.00  | 0.01  |
| 9    | 6  | -0.01 | 0.00  | -0.02 | -0.03 | -0.01 | -0.01 | 0.00  | -0.03 | 0.01  |
| 10   | 1  | -0.05 | -0.01 | 0.00  | -0.06 | -0.02 | 0.00  | 0.03  | -0.05 | -0.01 |
| 11   | 8  | 0.06  | -0.02 | 0.01  | -0.01 | -0.02 | 0.02  | -0.08 | 0.00  | -0.01 |
| 12   | 6  | -0.01 | 0.02  | -0.01 | -0.02 | 0.00  | -0.02 | 0.02  | -0.02 | 0.02  |
| 13   | 1  | 0.02  | -0.02 | 0.03  | -0.01 | -0.02 | 0.00  | 0.03  | -0.01 | 0.01  |
| 14   | 6  | 0.01  | 0.05  | -0.01 | -0.02 | -0.07 | 0.00  | -0.08 | -0.02 | 0.05  |

|    |   |       |       |       |       |       |       |       |       |       |
|----|---|-------|-------|-------|-------|-------|-------|-------|-------|-------|
| 15 | 8 | -0.02 | -0.01 | -0.01 | 0.01  | 0.01  | 0.00  | 0.01  | 0.00  | -0.04 |
| 16 | 6 | -0.01 | 0.00  | 0.01  | 0.02  | 0.02  | 0.00  | 0.00  | 0.03  | 0.00  |
| 17 | 1 | 0.00  | -0.03 | 0.01  | 0.00  | 0.02  | -0.03 | -0.01 | 0.01  | -0.03 |
| 18 | 1 | -0.01 | 0.02  | -0.01 | 0.04  | 0.04  | -0.02 | 0.02  | 0.08  | -0.03 |
| 19 | 1 | -0.02 | 0.00  | 0.04  | 0.05  | 0.02  | 0.02  | 0.03  | 0.05  | 0.06  |
| 20 | 6 | 0.00  | -0.01 | 0.00  | -0.01 | -0.02 | 0.00  | -0.02 | -0.01 | -0.02 |
| 21 | 1 | 0.00  | -0.03 | -0.01 | 0.00  | -0.03 | -0.01 | -0.01 | 0.01  | -0.02 |
| 22 | 6 | -0.02 | 0.02  | 0.06  | -0.02 | 0.05  | 0.06  | 0.01  | 0.07  | 0.00  |
| 23 | 1 | 0.05  | 0.12  | 0.13  | 0.05  | 0.14  | 0.13  | 0.08  | 0.20  | 0.03  |
| 24 | 1 | -0.15 | 0.01  | 0.11  | -0.13 | 0.08  | 0.07  | -0.10 | 0.09  | 0.01  |
| 25 | 1 | 0.01  | -0.04 | -0.02 | 0.04  | 0.00  | 0.04  | 0.11  | -0.01 | -0.02 |
| 26 | 6 | 0.02  | -0.04 | -0.04 | -0.01 | 0.06  | 0.10  | -0.01 | 0.03  | -0.02 |
| 27 | 1 | 0.07  | -0.01 | -0.09 | -0.12 | -0.02 | 0.20  | -0.03 | 0.04  | -0.01 |
| 28 | 1 | 0.00  | -0.12 | -0.09 | 0.06  | 0.20  | 0.20  | -0.02 | 0.04  | -0.01 |
| 29 | 6 | 0.00  | -0.02 | -0.02 | 0.00  | -0.01 | 0.03  | 0.03  | 0.02  | 0.05  |
| 30 | 1 | -0.05 | -0.04 | 0.01  | 0.00  | 0.00  | 0.02  | 0.13  | 0.07  | -0.01 |
| 31 | 1 | -0.01 | -0.02 | -0.07 | 0.00  | 0.00  | 0.04  | 0.06  | 0.00  | 0.16  |
| 32 | 6 | 0.01  | 0.00  | -0.01 | -0.01 | 0.01  | 0.01  | -0.02 | 0.00  | 0.01  |
| 33 | 1 | 0.00  | 0.01  | -0.01 | -0.03 | 0.03  | -0.01 | -0.03 | 0.01  | 0.00  |
| 34 | 6 | -0.01 | 0.01  | -0.01 | -0.02 | 0.01  | -0.01 | -0.02 | -0.01 | 0.00  |
| 35 | 1 | -0.04 | 0.02  | -0.02 | -0.04 | 0.04  | -0.03 | -0.01 | 0.01  | -0.01 |
| 36 | 6 | -0.03 | 0.03  | 0.00  | 0.08  | -0.01 | -0.04 | 0.05  | 0.05  | 0.00  |
| 37 | 1 | 0.26  | 0.20  | -0.10 | 0.26  | 0.06  | -0.06 | 0.22  | 0.17  | -0.07 |
| 38 | 1 | -0.30 | 0.23  | 0.10  | -0.03 | 0.08  | 0.02  | -0.08 | 0.18  | 0.11  |
| 39 | 1 | -0.05 | -0.30 | 0.01  | 0.07  | -0.17 | -0.10 | 0.04  | -0.11 | -0.03 |
| 40 | 6 | 0.03  | -0.01 | -0.02 | -0.03 | 0.00  | 0.02  | -0.02 | 0.01  | -0.01 |
| 41 | 1 | 0.05  | -0.01 | -0.02 | -0.07 | 0.00  | 0.00  | -0.02 | 0.01  | -0.02 |
| 42 | 6 | -0.02 | -0.01 | 0.03  | 0.00  | 0.08  | -0.02 | 0.12  | -0.02 | -0.02 |
| 43 | 1 | 0.10  | -0.14 | 0.00  | -0.25 | 0.40  | 0.04  | 0.40  | -0.33 | -0.11 |
| 44 | 1 | -0.20 | -0.02 | 0.01  | 0.37  | 0.10  | 0.12  | -0.22 | -0.05 | -0.17 |
| 45 | 1 | 0.05  | 0.15  | 0.10  | -0.13 | -0.23 | -0.21 | 0.26  | 0.26  | 0.22  |
| 46 | 6 | 0.03  | 0.00  | -0.01 | 0.01  | 0.00  | 0.02  | 0.03  | 0.00  | 0.01  |
| 47 | 1 | 0.05  | 0.01  | -0.05 | -0.02 | -0.01 | 0.06  | 0.03  | 0.00  | 0.01  |
| 48 | 6 | 0.01  | -0.01 | 0.02  | 0.02  | 0.01  | -0.02 | 0.02  | 0.00  | 0.01  |
| 49 | 1 | 0.03  | -0.02 | 0.04  | 0.01  | 0.04  | -0.04 | 0.03  | 0.00  | 0.02  |
| 50 | 1 | -0.02 | 0.00  | 0.02  | 0.06  | 0.01  | -0.02 | 0.03  | 0.01  | 0.02  |
| 51 | 6 | -0.01 | 0.00  | 0.01  | 0.02  | 0.01  | -0.01 | 0.00  | 0.01  | 0.00  |
| 52 | 1 | -0.05 | 0.00  | -0.01 | 0.07  | 0.01  | 0.01  | 0.07  | 0.00  | 0.02  |
| 53 | 6 | 0.02  | 0.03  | 0.01  | -0.06 | -0.04 | -0.04 | -0.09 | -0.01 | 0.01  |
| 54 | 1 | 0.05  | 0.04  | 0.03  | -0.10 | -0.06 | -0.08 | -0.12 | -0.02 | 0.01  |
| 55 | 6 | 0.00  | -0.01 | 0.01  | -0.03 | 0.01  | -0.04 | 0.00  | 0.00  | -0.06 |
| 56 | 1 | 0.00  | -0.04 | 0.03  | -0.03 | 0.05  | -0.06 | 0.06  | 0.00  | -0.13 |
| 57 | 6 | -0.02 | 0.03  | -0.03 | 0.00  | -0.05 | 0.02  | -0.07 | -0.01 | 0.04  |
| 58 | 1 | -0.04 | 0.04  | -0.06 | 0.04  | -0.06 | 0.05  | -0.07 | -0.01 | 0.07  |
| 59 | 8 | 0.02  | -0.02 | -0.01 | 0.02  | -0.03 | 0.00  | -0.04 | -0.01 | -0.01 |
| 60 | 8 | -0.08 | 0.08  | 0.05  | -0.07 | 0.03  | 0.02  | 0.06  | -0.02 | 0.01  |
| 61 | 8 | 0.02  | 0.02  | 0.03  | 0.03  | -0.03 | -0.03 | 0.05  | -0.01 | 0.00  |
| 62 | 6 | -0.01 | 0.04  | 0.00  | -0.01 | 0.01  | 0.00  | 0.02  | -0.01 | 0.01  |
| 63 | 6 | 0.01  | 0.02  | 0.01  | 0.01  | 0.01  | 0.00  | 0.00  | 0.00  | 0.00  |
| 64 | 6 | 0.01  | 0.03  | 0.02  | 0.01  | 0.01  | 0.01  | -0.01 | 0.00  | -0.01 |
| 65 | 8 | -0.02 | 0.00  | 0.00  | -0.01 | -0.01 | 0.00  | -0.01 | -0.01 | 0.01  |
| 66 | 1 | -0.01 | 0.01  | 0.01  | 0.01  | 0.01  | 0.01  | -0.02 | 0.01  | -0.02 |



|    |   |       |       |       |       |       |       |       |       |       |
|----|---|-------|-------|-------|-------|-------|-------|-------|-------|-------|
| 67 | 6 | 0.07  | 0.05  | -0.04 | 0.02  | 0.02  | -0.01 | 0.00  | -0.01 | 0.01  |
| 68 | 1 | 0.10  | 0.11  | -0.03 | 0.02  | 0.03  | -0.01 | 0.00  | -0.02 | 0.01  |
| 69 | 1 | 0.08  | 0.03  | -0.08 | 0.02  | 0.03  | -0.01 | 0.00  | -0.03 | 0.01  |
| 70 | 1 | 0.07  | 0.01  | -0.08 | 0.01  | 0.01  | -0.02 | 0.01  | 0.01  | 0.02  |
| 71 | 6 | -0.05 | -0.17 | -0.02 | -0.01 | -0.04 | -0.01 | 0.00  | 0.02  | 0.00  |
| 72 | 1 | 0.06  | -0.31 | -0.10 | 0.02  | -0.07 | -0.03 | -0.01 | 0.03  | 0.01  |
| 73 | 1 | -0.06 | -0.14 | -0.01 | -0.01 | -0.04 | -0.01 | 0.00  | 0.03  | 0.01  |
| 74 | 1 | -0.22 | -0.22 | 0.02  | -0.05 | -0.05 | 0.01  | 0.01  | 0.03  | -0.02 |

|                |  |          |  |          |  |          |
|----------------|--|----------|--|----------|--|----------|
|                |  | 37       |  | 38       |  | 39       |
|                |  | A        |  | A        |  | A        |
| Frequencies -- |  | 333.6644 |  | 346.0298 |  | 356.2731 |
| Red. masses -- |  | 3.3179   |  | 2.5180   |  | 2.7249   |
| Frc consts --  |  | 0.2176   |  | 0.1776   |  | 0.2038   |
| IR Inten --    |  | 0.3746   |  | 0.6318   |  | 1.7249   |
| Raman Activ -- |  | 1.3304   |  | 1.8682   |  | 3.3567   |
| Depolar (P) -- |  | 0.7483   |  | 0.5806   |  | 0.1111   |
| Depolar (U) -- |  | 0.8560   |  | 0.7347   |  | 0.2000   |

| Atom | AN | X     | Y     | Z     | X     | Y     | Z     | X     | Y     | Z     |
|------|----|-------|-------|-------|-------|-------|-------|-------|-------|-------|
| 1    | 6  | 0.05  | 0.00  | 0.04  | -0.01 | 0.00  | -0.03 | 0.06  | -0.05 | 0.03  |
| 2    | 6  | 0.04  | 0.02  | 0.01  | -0.02 | 0.01  | 0.01  | 0.01  | -0.07 | 0.03  |
| 3    | 6  | 0.03  | -0.01 | -0.01 | -0.01 | -0.03 | -0.02 | 0.03  | 0.00  | 0.01  |
| 4    | 6  | -0.02 | 0.00  | -0.03 | -0.01 | -0.02 | -0.05 | 0.00  | 0.00  | 0.01  |
| 5    | 6  | -0.03 | 0.03  | 0.01  | 0.01  | -0.03 | -0.06 | -0.02 | 0.02  | 0.03  |
| 6    | 6  | 0.03  | 0.05  | -0.02 | 0.00  | -0.02 | -0.01 | 0.00  | 0.01  | 0.01  |
| 7    | 8  | 0.00  | 0.04  | -0.01 | -0.02 | 0.01  | 0.07  | -0.06 | -0.04 | -0.01 |
| 8    | 6  | 0.00  | -0.02 | 0.01  | 0.03  | 0.03  | -0.02 | 0.04  | 0.03  | -0.08 |
| 9    | 6  | -0.04 | 0.04  | -0.02 | 0.01  | 0.00  | -0.02 | 0.00  | -0.06 | -0.06 |
| 10   | 1  | -0.11 | 0.05  | 0.01  | -0.01 | 0.00  | -0.01 | -0.02 | -0.10 | -0.06 |
| 11   | 8  | 0.10  | -0.02 | 0.02  | 0.01  | 0.02  | 0.01  | 0.01  | -0.02 | 0.01  |
| 12   | 6  | -0.06 | 0.03  | -0.05 | 0.00  | -0.02 | -0.02 | 0.01  | -0.03 | -0.03 |
| 13   | 1  | -0.07 | 0.02  | -0.04 | 0.00  | -0.04 | 0.01  | 0.08  | -0.02 | -0.03 |
| 14   | 6  | -0.07 | 0.00  | 0.08  | -0.02 | 0.01  | 0.02  | 0.01  | 0.00  | 0.00  |
| 15   | 8  | 0.03  | 0.00  | -0.02 | 0.00  | 0.00  | -0.01 | 0.01  | 0.00  | 0.01  |
| 16   | 6  | -0.01 | -0.05 | 0.01  | 0.04  | 0.05  | -0.02 | 0.00  | 0.16  | 0.02  |
| 17   | 1  | 0.00  | -0.13 | 0.01  | 0.04  | 0.21  | 0.03  | 0.03  | 0.34  | 0.14  |
| 18   | 1  | 0.02  | -0.03 | -0.01 | -0.05 | -0.04 | 0.05  | -0.23 | 0.15  | 0.04  |
| 19   | 1  | -0.08 | -0.04 | 0.04  | 0.11  | 0.02  | -0.13 | 0.13  | 0.17  | 0.02  |
| 20   | 6  | 0.01  | 0.00  | 0.02  | 0.03  | 0.01  | -0.02 | 0.04  | -0.04 | -0.06 |
| 21   | 1  | 0.00  | -0.05 | 0.01  | 0.03  | 0.01  | -0.02 | 0.01  | -0.10 | -0.06 |
| 22   | 6  | 0.05  | -0.03 | 0.04  | -0.10 | -0.08 | -0.01 | -0.02 | -0.07 | 0.10  |
| 23   | 1  | 0.07  | 0.02  | 0.04  | -0.22 | -0.36 | -0.01 | -0.05 | -0.18 | 0.16  |
| 24   | 1  | 0.00  | -0.06 | 0.08  | 0.12  | -0.05 | -0.09 | 0.01  | -0.06 | 0.08  |
| 25   | 1  | 0.06  | -0.07 | -0.02 | -0.29 | 0.11  | 0.10  | -0.13 | 0.01  | 0.11  |
| 26   | 6  | 0.05  | 0.04  | 0.00  | -0.02 | -0.03 | 0.07  | 0.03  | 0.02  | -0.03 |
| 27   | 1  | 0.05  | 0.04  | 0.00  | -0.08 | -0.10 | 0.13  | 0.07  | 0.05  | -0.07 |
| 28   | 1  | 0.02  | 0.05  | -0.01 | 0.02  | 0.07  | 0.13  | 0.01  | -0.04 | -0.07 |
| 29   | 6  | -0.04 | -0.04 | -0.04 | 0.03  | 0.05  | 0.00  | 0.15  | 0.07  | 0.04  |
| 30   | 1  | -0.15 | -0.10 | 0.03  | 0.05  | 0.08  | 0.00  | 0.32  | 0.24  | -0.04 |
| 31   | 1  | -0.07 | -0.02 | -0.17 | 0.04  | 0.05  | 0.04  | 0.21  | -0.01 | 0.26  |
| 32   | 6  | 0.01  | 0.01  | -0.01 | 0.01  | -0.01 | 0.00  | -0.06 | 0.01  | -0.09 |
| 33   | 1  | 0.00  | 0.04  | -0.01 | 0.02  | -0.05 | -0.01 | -0.20 | 0.04  | -0.20 |
| 34   | 6  | 0.01  | 0.01  | -0.01 | -0.01 | 0.00  | 0.01  | -0.03 | -0.02 | 0.00  |

|    |   |       |       |       |       |       |       |       |       |       |
|----|---|-------|-------|-------|-------|-------|-------|-------|-------|-------|
| 35 | 1 | -0.02 | 0.02  | -0.02 | 0.00  | -0.01 | 0.02  | -0.11 | 0.02  | -0.04 |
| 36 | 6 | -0.03 | -0.14 | -0.05 | -0.10 | 0.10  | -0.03 | 0.01  | -0.05 | 0.00  |
| 37 | 1 | -0.15 | -0.27 | 0.08  | -0.20 | 0.13  | -0.12 | -0.01 | -0.09 | 0.05  |
| 38 | 1 | 0.06  | -0.26 | -0.20 | -0.07 | 0.11  | 0.02  | 0.03  | -0.09 | -0.04 |
| 39 | 1 | -0.02 | -0.03 | -0.04 | -0.10 | 0.19  | 0.05  | 0.01  | -0.04 | 0.00  |
| 40 | 6 | 0.03  | -0.02 | 0.02  | -0.02 | -0.06 | 0.03  | 0.03  | 0.02  | -0.01 |
| 41 | 1 | 0.01  | -0.05 | 0.05  | -0.05 | -0.05 | 0.01  | 0.03  | 0.00  | 0.01  |
| 42 | 6 | 0.19  | 0.01  | 0.01  | 0.09  | 0.12  | 0.08  | -0.01 | -0.05 | -0.02 |
| 43 | 1 | 0.36  | -0.12 | -0.08 | 0.19  | 0.19  | -0.06 | -0.04 | -0.08 | 0.03  |
| 44 | 1 | 0.08  | 0.00  | -0.07 | 0.05  | 0.12  | 0.23  | 0.01  | -0.05 | -0.09 |
| 45 | 1 | 0.26  | 0.11  | 0.20  | 0.13  | 0.21  | 0.14  | -0.03 | -0.09 | -0.02 |
| 46 | 6 | -0.05 | 0.02  | 0.02  | 0.05  | -0.02 | -0.06 | -0.05 | 0.01  | 0.03  |
| 47 | 1 | -0.07 | 0.01  | 0.06  | 0.09  | -0.02 | -0.09 | -0.08 | 0.01  | 0.06  |
| 48 | 6 | -0.04 | 0.02  | 0.00  | 0.02  | -0.02 | 0.01  | -0.03 | 0.01  | -0.01 |
| 49 | 1 | -0.05 | 0.00  | -0.01 | 0.06  | -0.06 | 0.08  | -0.06 | 0.03  | -0.05 |
| 50 | 1 | -0.04 | 0.03  | 0.01  | -0.05 | 0.01  | 0.03  | 0.00  | 0.00  | -0.02 |
| 51 | 6 | 0.00  | 0.02  | 0.00  | 0.00  | -0.01 | 0.00  | -0.01 | 0.01  | 0.00  |
| 52 | 1 | 0.08  | 0.00  | 0.01  | 0.00  | -0.02 | -0.01 | -0.01 | 0.01  | 0.00  |
| 53 | 6 | -0.07 | 0.00  | 0.06  | -0.01 | 0.01  | 0.02  | 0.01  | 0.00  | 0.01  |
| 54 | 1 | -0.09 | 0.00  | 0.07  | -0.01 | 0.01  | 0.03  | 0.01  | 0.00  | 0.01  |
| 55 | 6 | 0.03  | 0.00  | -0.03 | 0.01  | 0.00  | -0.01 | 0.01  | 0.00  | 0.01  |
| 56 | 1 | 0.10  | -0.01 | -0.11 | 0.03  | -0.01 | -0.02 | 0.01  | 0.00  | 0.01  |
| 57 | 6 | -0.06 | 0.01  | 0.07  | -0.02 | 0.01  | 0.01  | 0.01  | 0.00  | 0.00  |
| 58 | 1 | -0.07 | 0.01  | 0.09  | -0.03 | 0.01  | 0.01  | 0.00  | 0.00  | 0.00  |
| 59 | 8 | 0.04  | 0.01  | 0.03  | 0.05  | -0.06 | -0.01 | -0.01 | 0.03  | 0.01  |
| 60 | 8 | -0.13 | 0.05  | -0.03 | -0.02 | 0.02  | 0.02  | -0.04 | 0.00  | -0.01 |
| 61 | 8 | -0.06 | 0.01  | -0.01 | 0.04  | -0.02 | -0.05 | -0.06 | 0.01  | 0.02  |
| 62 | 6 | -0.05 | 0.02  | -0.04 | -0.01 | 0.00  | 0.01  | -0.01 | 0.00  | -0.01 |
| 63 | 6 | -0.02 | -0.02 | -0.01 | -0.01 | 0.00  | 0.00  | 0.00  | 0.01  | 0.00  |
| 64 | 6 | 0.04  | -0.07 | 0.03  | 0.01  | -0.02 | 0.01  | 0.00  | 0.01  | 0.00  |
| 65 | 8 | 0.03  | 0.02  | -0.03 | -0.01 | -0.03 | 0.01  | 0.00  | 0.01  | 0.00  |
| 66 | 1 | 0.07  | -0.08 | 0.06  | 0.02  | -0.03 | 0.02  | 0.01  | 0.01  | 0.00  |
| 67 | 6 | -0.05 | -0.04 | -0.01 | -0.01 | -0.01 | 0.00  | 0.00  | 0.01  | 0.00  |
| 68 | 1 | -0.10 | -0.05 | -0.05 | -0.02 | -0.01 | -0.01 | 0.00  | 0.01  | 0.00  |
| 69 | 1 | -0.06 | 0.07  | 0.02  | -0.01 | 0.02  | 0.00  | 0.00  | 0.01  | 0.00  |
| 70 | 1 | -0.10 | -0.09 | -0.06 | -0.02 | -0.02 | -0.02 | 0.00  | 0.01  | 0.00  |
| 71 | 6 | 0.02  | 0.01  | 0.02  | 0.00  | 0.00  | 0.01  | 0.00  | 0.01  | 0.00  |
| 72 | 1 | -0.01 | 0.05  | 0.05  | 0.00  | -0.01 | 0.02  | 0.00  | 0.00  | 0.00  |
| 73 | 1 | 0.06  | -0.03 | -0.01 | 0.01  | 0.00  | 0.00  | 0.00  | 0.01  | -0.01 |
| 74 | 1 | 0.08  | 0.02  | 0.05  | -0.01 | -0.01 | 0.01  | 0.00  | 0.00  | 0.00  |

40

41

42

A

A

A

|                |          |          |          |
|----------------|----------|----------|----------|
| Frequencies -- | 357.6319 | 375.9518 | 382.0885 |
| Red. masses -- | 5.2731   | 4.2508   | 3.9981   |
| Frc consts --  | 0.3974   | 0.3540   | 0.3439   |
| IR Inten --    | 0.4099   | 0.8549   | 1.4512   |
| Raman Activ -- | 3.4574   | 2.7432   | 3.2765   |
| Depolar (P) -- | 0.3845   | 0.4094   | 0.2660   |
| Depolar (U) -- | 0.5554   | 0.5810   | 0.4202   |

| Atom | AN | X     | Y     | Z     | X    | Y     | Z     | X    | Y     | Z    |
|------|----|-------|-------|-------|------|-------|-------|------|-------|------|
| 1    | 6  | -0.03 | 0.01  | -0.08 | 0.01 | 0.00  | -0.02 | 0.05 | -0.05 | 0.02 |
| 2    | 6  | -0.08 | -0.06 | -0.05 | 0.01 | -0.02 | 0.00  | 0.04 | -0.11 | 0.01 |

|    |   |       |       |       |       |       |       |       |       |       |
|----|---|-------|-------|-------|-------|-------|-------|-------|-------|-------|
| 3  | 6 | 0.08  | 0.15  | -0.07 | 0.01  | 0.01  | -0.07 | 0.02  | 0.05  | -0.08 |
| 4  | 6 | 0.01  | 0.06  | 0.00  | -0.02 | 0.01  | -0.07 | 0.00  | 0.05  | -0.09 |
| 5  | 6 | 0.02  | -0.01 | 0.01  | -0.07 | 0.01  | -0.02 | -0.01 | -0.02 | -0.05 |
| 6  | 6 | 0.03  | -0.03 | 0.02  | -0.02 | -0.03 | -0.02 | -0.07 | -0.04 | 0.05  |
| 7  | 8 | -0.01 | -0.10 | -0.03 | -0.02 | 0.00  | 0.01  | -0.03 | -0.09 | -0.09 |
| 8  | 6 | 0.00  | -0.02 | 0.04  | 0.00  | -0.01 | 0.01  | -0.02 | -0.01 | 0.04  |
| 9  | 6 | -0.07 | -0.05 | 0.04  | 0.02  | -0.03 | 0.04  | 0.04  | 0.05  | 0.05  |
| 10 | 1 | -0.08 | -0.06 | 0.04  | 0.06  | -0.01 | 0.02  | 0.05  | 0.13  | 0.05  |
| 11 | 8 | -0.15 | -0.02 | 0.05  | -0.05 | -0.01 | 0.01  | 0.00  | 0.02  | -0.04 |
| 12 | 6 | -0.03 | 0.03  | 0.03  | 0.01  | -0.02 | 0.02  | 0.03  | 0.07  | 0.02  |
| 13 | 1 | 0.00  | 0.07  | -0.01 | 0.01  | -0.03 | 0.04  | 0.01  | 0.05  | 0.04  |
| 14 | 6 | -0.02 | 0.04  | 0.00  | 0.01  | 0.09  | 0.04  | 0.03  | -0.01 | -0.02 |
| 15 | 8 | -0.02 | -0.01 | -0.04 | 0.04  | -0.01 | 0.02  | -0.01 | 0.00  | 0.02  |
| 16 | 6 | 0.07  | 0.00  | -0.04 | -0.01 | -0.01 | 0.02  | -0.02 | 0.02  | 0.06  |
| 17 | 1 | 0.01  | 0.08  | -0.10 | 0.00  | -0.05 | 0.03  | -0.01 | -0.01 | 0.06  |
| 18 | 1 | 0.10  | -0.06 | 0.00  | 0.00  | 0.01  | 0.01  | -0.04 | 0.08  | 0.01  |
| 19 | 1 | 0.14  | -0.03 | -0.11 | -0.03 | -0.01 | 0.05  | -0.01 | 0.04  | 0.13  |
| 20 | 6 | 0.00  | -0.02 | -0.01 | 0.01  | -0.01 | 0.01  | 0.03  | -0.01 | 0.08  |
| 21 | 1 | 0.04  | 0.02  | -0.03 | 0.01  | 0.02  | 0.02  | 0.00  | 0.01  | 0.10  |
| 22 | 6 | -0.17 | 0.05  | 0.01  | -0.01 | 0.04  | 0.01  | 0.15  | 0.00  | 0.00  |
| 23 | 1 | -0.16 | -0.04 | 0.13  | 0.03  | 0.10  | 0.06  | 0.19  | 0.15  | -0.06 |
| 24 | 1 | -0.18 | 0.11  | -0.04 | -0.08 | 0.05  | 0.03  | 0.08  | 0.01  | 0.01  |
| 25 | 1 | -0.26 | 0.14  | 0.04  | 0.03  | 0.01  | -0.01 | 0.28  | -0.10 | 0.00  |
| 26 | 6 | 0.14  | -0.03 | 0.01  | 0.02  | -0.05 | 0.01  | -0.06 | -0.02 | 0.06  |
| 27 | 1 | 0.18  | -0.06 | 0.00  | 0.02  | -0.09 | 0.03  | -0.15 | -0.06 | 0.14  |
| 28 | 1 | 0.17  | -0.09 | -0.01 | 0.03  | -0.03 | 0.03  | 0.08  | -0.01 | 0.14  |
| 29 | 6 | -0.08 | 0.01  | 0.07  | -0.04 | -0.01 | 0.02  | 0.02  | -0.03 | 0.00  |
| 30 | 1 | -0.07 | -0.02 | 0.06  | -0.05 | -0.03 | 0.02  | 0.05  | -0.04 | -0.02 |
| 31 | 1 | -0.11 | 0.07  | 0.10  | -0.05 | 0.02  | 0.00  | 0.04  | -0.06 | 0.01  |
| 32 | 6 | 0.00  | -0.08 | 0.08  | -0.02 | 0.00  | 0.00  | -0.12 | 0.04  | -0.01 |
| 33 | 1 | 0.11  | -0.16 | 0.15  | -0.04 | 0.02  | -0.01 | -0.31 | 0.20  | -0.13 |
| 34 | 6 | -0.07 | -0.04 | -0.02 | -0.01 | -0.01 | -0.01 | 0.01  | -0.06 | 0.02  |
| 35 | 1 | 0.00  | -0.03 | -0.02 | -0.02 | 0.01  | -0.03 | -0.04 | 0.03  | -0.06 |
| 36 | 6 | -0.06 | -0.11 | 0.01  | 0.19  | 0.05  | -0.16 | -0.12 | 0.02  | -0.08 |
| 37 | 1 | -0.06 | -0.17 | 0.10  | 0.35  | 0.11  | -0.16 | -0.15 | 0.01  | -0.10 |
| 38 | 1 | -0.13 | -0.15 | -0.14 | 0.24  | 0.10  | 0.00  | -0.17 | 0.02  | -0.13 |
| 39 | 1 | -0.07 | -0.18 | 0.06  | 0.20  | 0.01  | -0.34 | -0.13 | 0.01  | 0.00  |
| 40 | 6 | 0.15  | 0.09  | -0.01 | 0.03  | -0.05 | 0.00  | -0.03 | 0.06  | -0.06 |
| 41 | 1 | 0.19  | 0.07  | 0.02  | 0.01  | -0.08 | 0.03  | -0.04 | 0.01  | -0.02 |
| 42 | 6 | -0.01 | -0.01 | 0.03  | 0.02  | 0.03  | 0.02  | 0.02  | 0.00  | 0.12  |
| 43 | 1 | -0.05 | 0.03  | 0.04  | 0.07  | 0.09  | -0.05 | 0.07  | 0.09  | 0.02  |
| 44 | 1 | 0.01  | 0.00  | 0.06  | 0.02  | 0.04  | 0.11  | 0.09  | 0.01  | 0.20  |
| 45 | 1 | -0.03 | -0.01 | -0.03 | 0.04  | 0.07  | 0.06  | 0.03  | -0.03 | 0.19  |
| 46 | 6 | 0.04  | -0.01 | 0.01  | -0.15 | 0.01  | -0.06 | 0.02  | -0.03 | -0.02 |
| 47 | 1 | 0.05  | -0.01 | -0.01 | -0.20 | 0.01  | -0.01 | 0.05  | -0.05 | -0.04 |
| 48 | 6 | 0.05  | -0.02 | -0.01 | -0.13 | -0.03 | -0.09 | 0.02  | 0.01  | -0.01 |
| 49 | 1 | 0.05  | 0.04  | -0.03 | -0.16 | -0.03 | -0.13 | 0.04  | 0.09  | -0.02 |
| 50 | 1 | 0.09  | -0.05 | -0.03 | -0.14 | -0.06 | -0.13 | 0.08  | -0.03 | -0.04 |
| 51 | 6 | 0.01  | -0.02 | 0.01  | -0.03 | -0.03 | -0.02 | -0.04 | 0.00  | 0.03  |
| 52 | 1 | -0.02 | -0.01 | 0.00  | -0.05 | -0.04 | -0.04 | -0.09 | 0.04  | 0.04  |
| 53 | 6 | -0.02 | 0.03  | 0.01  | 0.08  | 0.06  | 0.11  | 0.03  | -0.01 | -0.03 |
| 54 | 1 | 0.00  | 0.03  | 0.03  | 0.13  | 0.09  | 0.19  | 0.04  | -0.01 | -0.03 |

|    |   |       |       |       |       |       |       |       |       |       |
|----|---|-------|-------|-------|-------|-------|-------|-------|-------|-------|
| 55 | 6 | 0.00  | -0.01 | -0.02 | 0.09  | -0.01 | 0.07  | -0.01 | 0.00  | 0.02  |
| 56 | 1 | 0.02  | -0.03 | -0.03 | 0.12  | -0.06 | 0.07  | -0.05 | 0.01  | 0.05  |
| 57 | 6 | -0.05 | 0.02  | -0.02 | 0.00  | 0.08  | 0.03  | 0.04  | -0.01 | -0.02 |
| 58 | 1 | -0.07 | 0.03  | -0.04 | -0.05 | 0.09  | 0.00  | 0.04  | -0.01 | -0.02 |
| 59 | 8 | 0.21  | 0.18  | 0.00  | 0.10  | 0.02  | -0.01 | -0.05 | 0.16  | -0.04 |
| 60 | 8 | 0.01  | -0.01 | -0.02 | 0.07  | -0.02 | 0.04  | 0.03  | 0.05  | 0.04  |
| 61 | 8 | 0.05  | -0.01 | 0.03  | -0.15 | 0.00  | -0.08 | 0.05  | -0.05 | -0.03 |
| 62 | 6 | 0.00  | 0.00  | -0.01 | 0.03  | -0.03 | 0.04  | -0.01 | 0.01  | -0.01 |
| 63 | 6 | 0.00  | -0.01 | 0.00  | 0.01  | 0.00  | 0.02  | -0.04 | 0.00  | -0.01 |
| 64 | 6 | 0.00  | -0.02 | -0.01 | -0.02 | 0.02  | 0.00  | 0.02  | -0.05 | 0.03  |
| 65 | 8 | 0.01  | 0.04  | -0.01 | -0.04 | -0.09 | 0.04  | 0.00  | -0.05 | -0.01 |
| 66 | 1 | 0.00  | -0.02 | -0.01 | -0.03 | 0.02  | 0.00  | 0.05  | -0.08 | 0.06  |
| 67 | 6 | -0.01 | -0.02 | 0.00  | 0.02  | 0.02  | 0.01  | -0.02 | -0.03 | -0.01 |
| 68 | 1 | -0.02 | -0.03 | -0.01 | 0.04  | 0.04  | 0.02  | -0.04 | -0.02 | -0.03 |
| 69 | 1 | -0.01 | -0.01 | 0.00  | 0.02  | -0.02 | -0.01 | -0.03 | 0.04  | -0.01 |
| 70 | 1 | -0.02 | -0.02 | 0.00  | 0.04  | 0.03  | 0.02  | -0.06 | -0.07 | -0.05 |
| 71 | 6 | 0.01  | 0.00  | 0.00  | -0.01 | 0.01  | 0.01  | 0.00  | 0.00  | 0.03  |
| 72 | 1 | -0.01 | 0.02  | 0.00  | -0.01 | 0.01  | 0.01  | -0.02 | 0.02  | 0.07  |
| 73 | 1 | 0.01  | -0.01 | 0.00  | -0.03 | 0.03  | 0.02  | 0.05  | -0.03 | 0.00  |
| 74 | 1 | 0.02  | 0.00  | 0.01  | -0.02 | 0.01  | -0.02 | 0.02  | 0.00  | 0.07  |

|                |  |          |  |          |  |          |
|----------------|--|----------|--|----------|--|----------|
|                |  | 43       |  | 44       |  | 45       |
|                |  | A        |  | A        |  | A        |
| Frequencies -- |  | 392.6190 |  | 413.0980 |  | 428.6440 |
| Red. masses -- |  | 5.8153   |  | 3.8669   |  | 3.6541   |
| Frc consts --  |  | 0.5282   |  | 0.3888   |  | 0.3956   |
| IR Inten --    |  | 7.7847   |  | 9.3286   |  | 5.1146   |
| Raman Activ -- |  | 4.9174   |  | 5.9324   |  | 4.3598   |
| Depolar (P) -- |  | 0.2386   |  | 0.4679   |  | 0.4952   |
| Depolar (U) -- |  | 0.3852   |  | 0.6375   |  | 0.6624   |

| Atom | AN | X     | Y     | Z     | X     | Y     | Z     | X     | Y     | Z     |
|------|----|-------|-------|-------|-------|-------|-------|-------|-------|-------|
| 1    | 6  | 0.11  | 0.00  | 0.01  | 0.01  | 0.00  | 0.01  | 0.00  | 0.00  | -0.05 |
| 2    | 6  | 0.08  | 0.12  | 0.04  | 0.01  | 0.00  | 0.01  | 0.01  | -0.06 | -0.02 |
| 3    | 6  | 0.03  | 0.05  | -0.06 | 0.00  | 0.01  | 0.00  | 0.01  | -0.03 | -0.07 |
| 4    | 6  | -0.03 | -0.01 | -0.07 | 0.00  | 0.00  | 0.01  | -0.03 | -0.01 | -0.08 |
| 5    | 6  | -0.01 | -0.01 | -0.01 | 0.00  | -0.02 | -0.01 | -0.02 | 0.04  | 0.01  |
| 6    | 6  | -0.03 | 0.02  | 0.03  | -0.01 | -0.02 | -0.01 | 0.00  | 0.05  | 0.02  |
| 7    | 8  | -0.04 | 0.19  | 0.16  | 0.00  | 0.01  | 0.00  | -0.03 | -0.05 | -0.01 |
| 8    | 6  | 0.06  | -0.02 | -0.05 | 0.00  | -0.01 | 0.00  | 0.02  | 0.01  | 0.04  |
| 9    | 6  | -0.07 | -0.19 | -0.04 | -0.01 | 0.00  | -0.01 | 0.02  | 0.08  | 0.03  |
| 10   | 1  | -0.10 | -0.27 | -0.04 | 0.00  | -0.01 | -0.01 | 0.00  | 0.16  | 0.05  |
| 11   | 8  | -0.14 | -0.13 | 0.07  | 0.01  | -0.01 | 0.00  | 0.06  | 0.06  | -0.01 |
| 12   | 6  | -0.02 | -0.11 | -0.05 | 0.00  | 0.01  | 0.03  | -0.04 | -0.01 | -0.03 |
| 13   | 1  | 0.09  | -0.10 | -0.05 | 0.03  | -0.01 | 0.05  | -0.13 | -0.01 | -0.04 |
| 14   | 6  | 0.01  | -0.05 | -0.02 | 0.00  | 0.01  | 0.00  | 0.00  | -0.05 | -0.01 |
| 15   | 8  | -0.01 | 0.01  | 0.01  | 0.00  | 0.00  | 0.00  | 0.00  | 0.01  | 0.01  |
| 16   | 6  | -0.02 | -0.05 | 0.05  | 0.00  | 0.00  | 0.00  | 0.02  | -0.01 | 0.03  |
| 17   | 1  | 0.06  | -0.20 | 0.11  | 0.00  | 0.01  | 0.00  | 0.03  | 0.00  | 0.05  |
| 18   | 1  | -0.03 | 0.01  | 0.00  | 0.00  | 0.01  | 0.00  | 0.02  | -0.02 | 0.04  |
| 19   | 1  | -0.15 | -0.03 | 0.14  | 0.01  | 0.01  | 0.01  | 0.01  | -0.01 | 0.03  |
| 20   | 6  | 0.04  | -0.09 | -0.09 | 0.00  | -0.01 | 0.00  | 0.04  | 0.04  | 0.05  |
| 21   | 1  | 0.04  | -0.16 | -0.11 | 0.00  | -0.01 | 0.00  | 0.05  | 0.07  | 0.04  |
| 22   | 6  | 0.09  | -0.04 | 0.02  | 0.02  | -0.01 | 0.01  | -0.04 | 0.01  | -0.03 |

|    |   |       |       |       |       |       |       |       |       |       |
|----|---|-------|-------|-------|-------|-------|-------|-------|-------|-------|
| 23 | 1 | 0.10  | -0.01 | 0.03  | 0.02  | 0.00  | 0.00  | -0.04 | -0.02 | -0.01 |
| 24 | 1 | 0.05  | -0.10 | 0.08  | 0.01  | -0.01 | 0.02  | -0.03 | 0.04  | -0.06 |
| 25 | 1 | 0.08  | -0.07 | -0.07 | 0.02  | -0.02 | 0.00  | -0.05 | 0.04  | -0.01 |
| 26 | 6 | -0.02 | 0.04  | 0.02  | -0.02 | -0.01 | 0.02  | 0.03  | 0.02  | -0.06 |
| 27 | 1 | -0.06 | 0.02  | 0.05  | -0.06 | -0.05 | 0.07  | 0.16  | 0.14  | -0.19 |
| 28 | 1 | 0.04  | 0.03  | 0.05  | 0.04  | 0.03  | 0.07  | -0.14 | -0.09 | -0.20 |
| 29 | 6 | -0.10 | -0.01 | 0.03  | 0.01  | -0.01 | 0.00  | 0.00  | -0.01 | -0.03 |
| 30 | 1 | -0.16 | -0.06 | 0.06  | 0.01  | -0.01 | 0.00  | -0.07 | -0.07 | 0.00  |
| 31 | 1 | -0.17 | 0.13  | 0.02  | 0.01  | -0.01 | 0.00  | -0.02 | 0.01  | -0.12 |
| 32 | 6 | 0.10  | 0.02  | -0.10 | 0.00  | 0.01  | -0.01 | -0.08 | 0.02  | 0.02  |
| 33 | 1 | 0.09  | 0.02  | -0.11 | -0.02 | 0.02  | -0.02 | -0.18 | 0.11  | -0.06 |
| 34 | 6 | 0.03  | 0.06  | -0.07 | 0.00  | 0.00  | 0.00  | 0.01  | -0.05 | 0.01  |
| 35 | 1 | -0.08 | 0.05  | -0.06 | -0.01 | 0.01  | 0.00  | 0.01  | 0.01  | -0.04 |
| 36 | 6 | -0.06 | 0.03  | -0.08 | 0.02  | 0.01  | 0.00  | -0.07 | 0.04  | -0.10 |
| 37 | 1 | -0.11 | 0.04  | -0.12 | 0.05  | 0.02  | 0.00  | -0.11 | 0.05  | -0.14 |
| 38 | 1 | -0.04 | 0.03  | -0.06 | 0.02  | 0.02  | 0.03  | -0.05 | 0.04  | -0.08 |
| 39 | 1 | -0.06 | 0.08  | -0.04 | 0.02  | -0.01 | -0.02 | -0.07 | 0.08  | -0.06 |
| 40 | 6 | -0.01 | 0.06  | -0.03 | -0.01 | 0.02  | -0.01 | 0.01  | -0.08 | 0.04  |
| 41 | 1 | -0.03 | 0.00  | 0.03  | 0.00  | 0.02  | -0.01 | -0.03 | -0.12 | 0.07  |
| 42 | 6 | 0.03  | -0.02 | 0.04  | 0.01  | 0.01  | 0.01  | 0.01  | -0.03 | -0.01 |
| 43 | 1 | 0.07  | -0.04 | 0.01  | 0.01  | 0.05  | -0.01 | 0.02  | -0.12 | 0.03  |
| 44 | 1 | 0.06  | -0.02 | -0.01 | 0.02  | 0.02  | 0.06  | -0.01 | -0.04 | -0.13 |
| 45 | 1 | 0.04  | -0.05 | 0.11  | 0.01  | 0.02  | 0.02  | 0.01  | -0.05 | 0.02  |
| 46 | 6 | 0.04  | -0.01 | 0.02  | 0.00  | -0.01 | -0.03 | 0.00  | 0.03  | 0.10  |
| 47 | 1 | 0.07  | -0.02 | 0.01  | 0.00  | -0.01 | -0.04 | 0.01  | 0.00  | 0.12  |
| 48 | 6 | 0.03  | 0.04  | 0.04  | -0.01 | -0.02 | -0.01 | 0.02  | 0.09  | 0.06  |
| 49 | 1 | 0.05  | 0.06  | 0.04  | 0.00  | -0.02 | 0.00  | 0.00  | 0.10  | 0.04  |
| 50 | 1 | 0.06  | 0.04  | 0.04  | -0.03 | -0.02 | -0.02 | 0.08  | 0.12  | 0.10  |
| 51 | 6 | -0.01 | 0.03  | 0.02  | -0.01 | -0.01 | 0.00  | 0.00  | 0.07  | 0.02  |
| 52 | 1 | -0.02 | 0.05  | 0.04  | -0.01 | -0.02 | -0.01 | 0.02  | 0.09  | 0.05  |
| 53 | 6 | -0.01 | -0.04 | -0.05 | 0.01  | 0.01  | 0.01  | -0.02 | -0.04 | -0.05 |
| 54 | 1 | -0.03 | -0.05 | -0.09 | 0.02  | 0.01  | 0.03  | -0.05 | -0.06 | -0.10 |
| 55 | 6 | -0.03 | 0.01  | -0.01 | 0.01  | 0.00  | 0.01  | -0.04 | 0.01  | -0.02 |
| 56 | 1 | -0.07 | 0.04  | 0.01  | 0.02  | -0.01 | 0.01  | -0.06 | 0.04  | -0.02 |
| 57 | 6 | 0.03  | -0.04 | -0.01 | 0.00  | 0.01  | 0.00  | 0.02  | -0.05 | -0.01 |
| 58 | 1 | 0.06  | -0.05 | 0.01  | -0.01 | 0.01  | 0.00  | 0.06  | -0.06 | 0.02  |
| 59 | 8 | -0.02 | 0.16  | -0.01 | -0.02 | 0.03  | -0.01 | 0.12  | -0.03 | 0.01  |
| 60 | 8 | -0.01 | -0.05 | -0.01 | -0.06 | 0.06  | 0.06  | -0.03 | -0.07 | -0.03 |
| 61 | 8 | 0.03  | -0.01 | 0.01  | 0.00  | -0.01 | -0.02 | -0.01 | 0.01  | 0.04  |
| 62 | 6 | 0.02  | -0.04 | 0.04  | 0.05  | 0.03  | 0.10  | 0.04  | -0.07 | 0.06  |
| 63 | 6 | 0.04  | 0.00  | 0.03  | 0.16  | -0.08 | 0.07  | 0.12  | -0.06 | 0.10  |
| 64 | 6 | -0.04 | 0.07  | -0.01 | -0.04 | -0.04 | -0.22 | -0.07 | 0.08  | -0.04 |
| 65 | 8 | -0.03 | -0.05 | 0.04  | 0.01  | 0.22  | 0.10  | -0.04 | -0.06 | 0.06  |
| 66 | 1 | -0.07 | 0.10  | -0.04 | -0.19 | 0.02  | -0.34 | -0.17 | 0.15  | -0.13 |
| 67 | 6 | 0.04  | 0.06  | 0.02  | -0.09 | -0.19 | -0.02 | 0.03  | 0.05  | 0.02  |
| 68 | 1 | 0.08  | 0.07  | 0.05  | -0.14 | -0.43 | 0.00  | 0.09  | 0.05  | 0.06  |
| 69 | 1 | 0.05  | -0.04 | -0.01 | -0.12 | -0.29 | 0.09  | 0.05  | -0.12 | -0.01 |
| 70 | 1 | 0.09  | 0.09  | 0.05  | -0.03 | 0.02  | 0.20  | 0.12  | 0.12  | 0.09  |
| 71 | 6 | -0.01 | 0.02  | -0.02 | 0.00  | -0.02 | -0.10 | -0.02 | 0.02  | -0.02 |
| 72 | 1 | 0.01  | -0.01 | -0.05 | 0.02  | -0.02 | -0.31 | -0.02 | 0.03  | -0.13 |
| 73 | 1 | -0.07 | 0.06  | 0.02  | -0.26 | -0.01 | 0.02  | -0.21 | 0.09  | 0.08  |
| 74 | 1 | -0.04 | 0.01  | -0.08 | 0.00  | -0.02 | -0.22 | -0.01 | 0.03  | -0.18 |

|                |    |  | 46       |       |       | 47       |       |       | 48       |       |       |
|----------------|----|--|----------|-------|-------|----------|-------|-------|----------|-------|-------|
|                |    |  | A        |       |       | A        |       |       | A        |       |       |
| Frequencies -- |    |  | 437.3603 |       |       | 448.8670 |       |       | 461.4543 |       |       |
| Red. masses -- |    |  | 3.8445   |       |       | 2.9555   |       |       | 3.4801   |       |       |
| Frc consts --  |    |  | 0.4333   |       |       | 0.3508   |       |       | 0.4366   |       |       |
| IR Inten --    |    |  | 1.9255   |       |       | 4.9702   |       |       | 4.0236   |       |       |
| Raman Activ -- |    |  | 2.8690   |       |       | 8.8493   |       |       | 0.9512   |       |       |
| Depolar (P) -- |    |  | 0.6591   |       |       | 0.4193   |       |       | 0.7386   |       |       |
| Depolar (U) -- |    |  | 0.7945   |       |       | 0.5909   |       |       | 0.8496   |       |       |
| Atom           | AN |  | X        | Y     | Z     | X        | Y     | Z     | X        | Y     | Z     |
| 1              | 6  |  | 0.01     | -0.01 | -0.04 | 0.06     | -0.03 | 0.06  | -0.01    | 0.02  | -0.03 |
| 2              | 6  |  | 0.02     | 0.00  | -0.01 | -0.07    | 0.01  | -0.02 | 0.01     | -0.02 | 0.00  |
| 3              | 6  |  | 0.00     | -0.05 | -0.05 | 0.03     | -0.02 | 0.02  | 0.02     | 0.04  | 0.03  |
| 4              | 6  |  | -0.01    | 0.01  | -0.05 | 0.00     | -0.01 | -0.04 | 0.02     | -0.04 | 0.08  |
| 5              | 6  |  | -0.01    | 0.05  | 0.00  | -0.02    | 0.00  | -0.03 | -0.02    | -0.10 | -0.02 |
| 6              | 6  |  | -0.01    | 0.04  | 0.02  | -0.04    | 0.01  | 0.03  | -0.06    | -0.02 | 0.00  |
| 7              | 8  |  | -0.03    | 0.03  | 0.06  | 0.03     | -0.04 | -0.06 | -0.01    | -0.01 | 0.00  |
| 8              | 6  |  | 0.02     | 0.00  | 0.01  | -0.05    | 0.05  | -0.06 | 0.03     | -0.01 | 0.01  |
| 9              | 6  |  | 0.04     | -0.05 | 0.04  | 0.01     | 0.03  | -0.01 | -0.01    | 0.00  | 0.00  |
| 10             | 1  |  | 0.09     | -0.06 | 0.01  | 0.02     | 0.01  | -0.01 | -0.01    | 0.01  | 0.00  |
| 11             | 8  |  | -0.08    | -0.02 | 0.00  | 0.01     | 0.07  | 0.03  | 0.01     | -0.01 | 0.00  |
| 12             | 6  |  | 0.07     | 0.01  | 0.06  | 0.01     | 0.00  | 0.00  | -0.02    | -0.01 | 0.01  |
| 13             | 1  |  | 0.12     | -0.05 | 0.13  | -0.01    | -0.01 | 0.01  | -0.02    | 0.01  | -0.01 |
| 14             | 6  |  | 0.01     | -0.04 | -0.01 | 0.01     | -0.03 | -0.01 | 0.00     | -0.05 | 0.00  |
| 15             | 8  |  | 0.00     | 0.01  | 0.01  | 0.00     | 0.00  | 0.02  | 0.01     | 0.01  | 0.02  |
| 16             | 6  |  | 0.01     | -0.01 | 0.02  | -0.09    | -0.02 | -0.08 | 0.04     | 0.00  | 0.03  |
| 17             | 1  |  | 0.03     | -0.02 | 0.03  | -0.07    | -0.06 | -0.07 | 0.04     | 0.00  | 0.05  |
| 18             | 1  |  | 0.01     | 0.00  | 0.02  | -0.03    | -0.08 | -0.04 | 0.01     | 0.01  | 0.02  |
| 19             | 1  |  | 0.00     | 0.00  | 0.03  | -0.16    | -0.05 | -0.14 | 0.04     | 0.00  | 0.05  |
| 20             | 6  |  | 0.02     | -0.02 | 0.00  | 0.00     | 0.01  | -0.01 | 0.02     | 0.01  | -0.01 |
| 21             | 1  |  | 0.02     | 0.03  | 0.02  | -0.07    | -0.04 | 0.03  | 0.04     | 0.02  | -0.02 |
| 22             | 6  |  | -0.02    | 0.01  | -0.01 | 0.07     | -0.03 | 0.10  | -0.04    | 0.02  | -0.03 |
| 23             | 1  |  | -0.02    | -0.02 | 0.03  | 0.09     | 0.00  | 0.13  | -0.04    | 0.01  | 0.00  |
| 24             | 1  |  | -0.03    | 0.04  | -0.03 | 0.02     | -0.04 | 0.11  | -0.05    | 0.02  | -0.02 |
| 25             | 1  |  | -0.04    | 0.04  | 0.01  | 0.08     | -0.05 | 0.07  | -0.06    | 0.03  | -0.04 |
| 26             | 6  |  | 0.00     | 0.00  | -0.07 | 0.00     | 0.00  | -0.01 | -0.04    | -0.02 | -0.01 |
| 27             | 1  |  | 0.14     | 0.14  | -0.22 | 0.02     | 0.03  | -0.03 | 0.04     | -0.05 | -0.04 |
| 28             | 1  |  | -0.18    | -0.12 | -0.23 | 0.00     | -0.05 | -0.03 | -0.05    | -0.06 | -0.04 |
| 29             | 6  |  | -0.04    | 0.00  | 0.02  | 0.02     | 0.12  | 0.00  | -0.01    | -0.02 | -0.01 |
| 30             | 1  |  | -0.04    | -0.02 | 0.02  | 0.06     | 0.23  | 0.00  | -0.05    | -0.08 | 0.01  |
| 31             | 1  |  | -0.06    | 0.05  | 0.03  | 0.05     | 0.06  | 0.08  | -0.03    | 0.01  | -0.06 |
| 32             | 6  |  | 0.01     | 0.01  | -0.02 | 0.11     | -0.13 | 0.08  | -0.04    | 0.03  | -0.03 |
| 33             | 1  |  | -0.02    | 0.04  | -0.03 | 0.47     | -0.45 | 0.32  | -0.16    | 0.12  | -0.11 |
| 34             | 6  |  | 0.01     | 0.00  | -0.03 | -0.11    | 0.03  | -0.03 | 0.03     | -0.02 | 0.01  |
| 35             | 1  |  | 0.00     | 0.02  | -0.05 | 0.02     | -0.08 | 0.07  | -0.01    | 0.02  | -0.03 |
| 36             | 6  |  | -0.01    | 0.05  | -0.07 | 0.00     | 0.00  | -0.06 | 0.11     | -0.02 | 0.10  |
| 37             | 1  |  | 0.00     | 0.08  | -0.12 | 0.02     | 0.00  | -0.06 | 0.17     | 0.00  | 0.11  |
| 38             | 1  |  | 0.00     | 0.08  | -0.02 | 0.01     | 0.00  | -0.05 | 0.12     | -0.01 | 0.14  |
| 39             | 1  |  | -0.01    | 0.06  | -0.08 | 0.00     | 0.00  | -0.08 | 0.12     | -0.04 | 0.02  |
| 40             | 6  |  | -0.01    | -0.10 | 0.04  | 0.02     | 0.02  | -0.01 | 0.01     | 0.08  | 0.02  |
| 41             | 1  |  | -0.05    | -0.13 | 0.06  | 0.00     | 0.01  | -0.01 | 0.04     | 0.12  | -0.01 |
| 42             | 6  |  | -0.04    | -0.05 | -0.02 | 0.01     | -0.03 | 0.05  | 0.02     | -0.01 | 0.04  |

|    |   |       |       |       |       |       |       |       |       |       |
|----|---|-------|-------|-------|-------|-------|-------|-------|-------|-------|
| 43 | 1 | -0.07 | -0.10 | 0.03  | 0.05  | -0.03 | 0.01  | 0.09  | 0.01  | -0.04 |
| 44 | 1 | 0.00  | -0.05 | -0.12 | 0.04  | -0.03 | 0.02  | 0.02  | -0.01 | 0.07  |
| 45 | 1 | -0.05 | -0.12 | -0.03 | 0.02  | -0.06 | 0.12  | 0.05  | 0.01  | 0.13  |
| 46 | 6 | -0.02 | 0.02  | 0.08  | 0.01  | 0.01  | -0.01 | 0.11  | 0.02  | -0.13 |
| 47 | 1 | -0.02 | 0.00  | 0.12  | 0.04  | -0.03 | 0.02  | 0.23  | -0.09 | -0.09 |
| 48 | 6 | 0.00  | 0.09  | 0.05  | -0.01 | 0.07  | 0.04  | 0.01  | 0.11  | 0.10  |
| 49 | 1 | -0.02 | 0.11  | 0.02  | 0.03  | 0.05  | 0.09  | 0.18  | -0.14 | 0.40  |
| 50 | 1 | 0.06  | 0.09  | 0.06  | -0.04 | 0.09  | 0.06  | -0.30 | 0.27  | 0.24  |
| 51 | 6 | -0.01 | 0.06  | 0.03  | -0.04 | 0.05  | 0.04  | -0.03 | 0.08  | 0.03  |
| 52 | 1 | 0.00  | 0.09  | 0.06  | -0.05 | 0.08  | 0.06  | -0.03 | 0.11  | 0.06  |
| 53 | 6 | -0.01 | -0.03 | -0.05 | 0.01  | -0.03 | -0.04 | -0.01 | -0.05 | -0.05 |
| 54 | 1 | -0.03 | -0.05 | -0.09 | 0.00  | -0.04 | -0.07 | -0.03 | -0.07 | -0.10 |
| 55 | 6 | -0.03 | 0.01  | -0.01 | -0.02 | 0.01  | 0.00  | -0.03 | 0.01  | -0.01 |
| 56 | 1 | -0.06 | 0.04  | 0.00  | -0.05 | 0.03  | 0.02  | -0.06 | 0.05  | 0.00  |
| 57 | 6 | 0.03  | -0.04 | -0.01 | 0.03  | -0.03 | -0.01 | 0.04  | -0.05 | 0.00  |
| 58 | 1 | 0.06  | -0.04 | 0.01  | 0.06  | -0.03 | 0.00  | 0.09  | -0.06 | 0.03  |
| 59 | 8 | 0.09  | -0.07 | 0.00  | -0.01 | 0.00  | 0.00  | 0.05  | 0.03  | 0.00  |
| 60 | 8 | 0.08  | 0.13  | 0.10  | 0.02  | 0.00  | 0.01  | -0.02 | -0.01 | -0.02 |
| 61 | 8 | -0.01 | 0.01  | 0.01  | -0.03 | -0.02 | -0.06 | -0.18 | -0.02 | -0.14 |
| 62 | 6 | -0.01 | 0.09  | -0.01 | 0.01  | 0.00  | 0.01  | -0.01 | 0.00  | -0.02 |
| 63 | 6 | -0.11 | 0.06  | -0.09 | 0.01  | -0.01 | 0.01  | -0.01 | 0.01  | -0.02 |
| 64 | 6 | 0.08  | -0.12 | -0.01 | -0.01 | 0.00  | -0.01 | 0.01  | 0.00  | 0.01  |
| 65 | 8 | 0.03  | 0.07  | -0.01 | -0.01 | -0.02 | 0.01  | 0.01  | 0.02  | -0.02 |
| 66 | 1 | 0.16  | -0.20 | 0.08  | -0.02 | 0.00  | -0.01 | 0.03  | 0.00  | 0.02  |
| 67 | 6 | -0.07 | -0.12 | -0.03 | 0.00  | -0.01 | 0.00  | 0.00  | 0.01  | 0.00  |
| 68 | 1 | -0.16 | -0.20 | -0.08 | 0.00  | -0.01 | 0.00  | 0.00  | 0.02  | 0.00  |
| 69 | 1 | -0.10 | 0.07  | 0.03  | 0.00  | -0.02 | 0.00  | 0.01  | 0.03  | 0.00  |
| 70 | 1 | -0.17 | -0.15 | -0.05 | 0.00  | 0.00  | 0.01  | 0.00  | 0.00  | -0.01 |
| 71 | 6 | 0.01  | -0.03 | 0.01  | 0.00  | 0.00  | 0.00  | 0.01  | -0.01 | 0.00  |
| 72 | 1 | 0.02  | -0.05 | 0.08  | 0.00  | 0.00  | -0.01 | 0.01  | -0.01 | 0.01  |
| 73 | 1 | 0.18  | -0.13 | -0.09 | -0.02 | 0.01  | 0.01  | 0.04  | -0.01 | -0.02 |
| 74 | 1 | -0.01 | -0.04 | 0.19  | 0.00  | 0.00  | -0.01 | 0.00  | -0.01 | 0.02  |

|                |  |          |  |          |  |          |
|----------------|--|----------|--|----------|--|----------|
|                |  | 49       |  | 50       |  | 51       |
|                |  | A        |  | A        |  | A        |
| Frequencies -- |  | 474.4059 |  | 490.4839 |  | 507.5983 |
| Red. masses -- |  | 3.3581   |  | 4.5002   |  | 4.5219   |
| Frc consts --  |  | 0.4453   |  | 0.6379   |  | 0.6864   |
| IR Inten --    |  | 2.4947   |  | 17.4798  |  | 1.4410   |
| Raman Activ -- |  | 10.7229  |  | 6.6422   |  | 4.1594   |
| Depolar (P) -- |  | 0.0707   |  | 0.1457   |  | 0.2851   |
| Depolar (U) -- |  | 0.1320   |  | 0.2543   |  | 0.4436   |

| Atom | AN | X     | Y     | Z     | X     | Y     | Z     | X     | Y     | Z     |
|------|----|-------|-------|-------|-------|-------|-------|-------|-------|-------|
| 1    | 6  | 0.05  | -0.03 | -0.05 | -0.10 | 0.02  | 0.05  | -0.05 | 0.02  | 0.05  |
| 2    | 6  | -0.04 | -0.11 | -0.01 | -0.07 | 0.01  | 0.13  | -0.05 | 0.02  | 0.10  |
| 3    | 6  | 0.01  | -0.02 | -0.02 | -0.03 | 0.03  | 0.08  | -0.03 | 0.04  | -0.02 |
| 4    | 6  | 0.03  | -0.04 | 0.03  | 0.01  | 0.05  | -0.01 | -0.08 | -0.03 | -0.05 |
| 5    | 6  | 0.01  | -0.02 | 0.03  | 0.02  | 0.08  | -0.06 | -0.06 | -0.08 | 0.05  |
| 6    | 6  | 0.01  | 0.00  | -0.01 | -0.04 | 0.00  | 0.05  | 0.05  | -0.03 | -0.07 |
| 7    | 8  | -0.07 | -0.11 | 0.02  | 0.03  | -0.04 | -0.07 | 0.04  | -0.02 | -0.09 |
| 8    | 6  | 0.15  | 0.10  | -0.03 | 0.05  | 0.06  | 0.02  | 0.02  | 0.04  | -0.01 |
| 9    | 6  | 0.03  | 0.01  | -0.04 | -0.02 | -0.09 | -0.13 | 0.01  | -0.06 | -0.06 |
| 10   | 1  | 0.02  | 0.00  | -0.03 | -0.01 | -0.23 | -0.15 | 0.04  | -0.12 | -0.09 |

|    |   |       |       |       |       |       |       |       |       |       |
|----|---|-------|-------|-------|-------|-------|-------|-------|-------|-------|
| 11 | 8 | -0.01 | 0.11  | 0.04  | 0.02  | -0.05 | -0.01 | 0.04  | -0.03 | -0.03 |
| 12 | 6 | 0.02  | -0.05 | -0.02 | 0.07  | -0.02 | -0.05 | 0.01  | -0.03 | -0.01 |
| 13 | 1 | 0.05  | -0.05 | -0.02 | 0.18  | -0.02 | -0.04 | 0.06  | -0.07 | 0.04  |
| 14 | 6 | 0.00  | 0.01  | 0.00  | 0.00  | 0.01  | 0.00  | 0.00  | -0.02 | 0.00  |
| 15 | 8 | 0.00  | 0.00  | 0.00  | -0.01 | 0.00  | 0.01  | 0.00  | 0.00  | -0.01 |
| 16 | 6 | 0.06  | -0.09 | 0.10  | 0.05  | -0.03 | 0.02  | 0.00  | -0.01 | 0.00  |
| 17 | 1 | 0.21  | -0.30 | 0.24  | 0.05  | -0.10 | 0.00  | 0.01  | -0.05 | 0.00  |
| 18 | 1 | 0.08  | -0.14 | 0.13  | 0.14  | -0.07 | 0.05  | 0.03  | -0.04 | 0.02  |
| 19 | 1 | -0.24 | -0.12 | 0.07  | -0.04 | -0.05 | -0.03 | -0.06 | -0.03 | -0.04 |
| 20 | 6 | 0.12  | 0.01  | -0.06 | -0.05 | -0.03 | -0.12 | -0.02 | -0.01 | -0.06 |
| 21 | 1 | 0.15  | -0.01 | -0.08 | 0.01  | -0.09 | -0.18 | -0.01 | -0.03 | -0.07 |
| 22 | 6 | 0.02  | 0.02  | -0.01 | -0.02 | -0.01 | -0.03 | 0.02  | -0.02 | -0.01 |
| 23 | 1 | 0.06  | 0.06  | 0.07  | -0.06 | 0.02  | -0.15 | -0.01 | 0.01  | -0.12 |
| 24 | 1 | -0.08 | 0.04  | -0.01 | 0.04  | -0.07 | 0.01  | 0.07  | -0.08 | 0.03  |
| 25 | 1 | 0.04  | -0.01 | -0.03 | 0.01  | -0.05 | -0.06 | 0.05  | -0.05 | -0.04 |
| 26 | 6 | -0.04 | 0.02  | 0.00  | 0.02  | 0.00  | -0.03 | 0.06  | -0.05 | 0.04  |
| 27 | 1 | -0.06 | 0.01  | 0.02  | 0.15  | 0.10  | -0.15 | -0.10 | -0.21 | 0.20  |
| 28 | 1 | -0.05 | 0.05  | 0.02  | -0.07 | -0.15 | -0.15 | 0.23  | 0.11  | 0.20  |
| 29 | 6 | -0.09 | 0.17  | -0.04 | -0.02 | 0.02  | -0.03 | 0.02  | 0.01  | -0.05 |
| 30 | 1 | -0.30 | 0.00  | 0.06  | -0.09 | -0.06 | 0.00  | 0.01  | 0.01  | -0.04 |
| 31 | 1 | -0.21 | 0.37  | -0.24 | -0.06 | 0.09  | -0.12 | 0.02  | 0.02  | -0.06 |
| 32 | 6 | 0.01  | 0.00  | 0.00  | -0.04 | 0.12  | 0.07  | -0.03 | 0.05  | 0.06  |
| 33 | 1 | -0.06 | -0.07 | -0.07 | -0.17 | 0.09  | -0.05 | -0.08 | -0.03 | 0.01  |
| 34 | 6 | -0.05 | 0.00  | 0.00  | -0.02 | 0.13  | 0.23  | -0.05 | 0.08  | 0.18  |
| 35 | 1 | -0.05 | 0.09  | -0.08 | -0.06 | 0.14  | 0.22  | -0.06 | 0.06  | 0.20  |
| 36 | 6 | 0.00  | 0.00  | 0.06  | 0.00  | -0.03 | -0.03 | -0.04 | 0.02  | -0.12 |
| 37 | 1 | -0.02 | 0.03  | 0.01  | 0.01  | -0.09 | 0.07  | -0.03 | 0.05  | -0.15 |
| 38 | 1 | -0.03 | 0.03  | 0.08  | 0.02  | -0.08 | -0.10 | 0.00  | 0.04  | -0.04 |
| 39 | 1 | -0.01 | 0.00  | 0.11  | 0.00  | -0.05 | -0.06 | -0.03 | 0.06  | -0.15 |
| 40 | 6 | -0.05 | 0.00  | 0.01  | 0.03  | 0.04  | 0.02  | 0.05  | -0.03 | -0.05 |
| 41 | 1 | -0.07 | -0.03 | 0.03  | 0.07  | 0.13  | -0.05 | 0.09  | -0.06 | -0.01 |
| 42 | 6 | 0.00  | 0.01  | -0.02 | 0.01  | -0.04 | 0.10  | -0.01 | 0.04  | -0.11 |
| 43 | 1 | -0.02 | 0.00  | 0.00  | 0.07  | -0.03 | 0.03  | -0.08 | 0.07  | -0.06 |
| 44 | 1 | -0.01 | 0.01  | -0.02 | 0.06  | -0.04 | 0.07  | -0.06 | 0.05  | -0.04 |
| 45 | 1 | -0.01 | 0.02  | -0.05 | 0.02  | -0.08 | 0.20  | -0.03 | 0.09  | -0.25 |
| 46 | 6 | -0.01 | -0.01 | -0.01 | -0.05 | 0.02  | 0.00  | 0.08  | -0.02 | 0.04  |
| 47 | 1 | -0.04 | 0.02  | -0.02 | -0.09 | -0.01 | 0.07  | 0.19  | -0.01 | -0.06 |
| 48 | 6 | -0.01 | -0.05 | -0.03 | -0.04 | 0.03  | -0.02 | 0.09  | 0.01  | 0.07  |
| 49 | 1 | -0.02 | -0.05 | -0.04 | -0.06 | 0.17  | -0.10 | 0.12  | -0.17 | 0.17  |
| 50 | 1 | -0.01 | -0.05 | -0.04 | 0.07  | -0.05 | -0.10 | -0.02 | 0.13  | 0.19  |
| 51 | 6 | 0.01  | -0.03 | -0.02 | -0.06 | 0.01  | 0.06  | 0.08  | 0.01  | -0.06 |
| 52 | 1 | 0.02  | -0.05 | -0.04 | -0.10 | 0.04  | 0.07  | 0.12  | 0.00  | -0.06 |
| 53 | 6 | 0.00  | 0.01  | 0.02  | 0.03  | 0.00  | -0.02 | -0.04 | -0.01 | 0.00  |
| 54 | 1 | 0.00  | 0.02  | 0.04  | 0.04  | 0.00  | -0.02 | -0.06 | -0.02 | -0.01 |
| 55 | 6 | 0.01  | 0.00  | 0.00  | -0.01 | 0.00  | 0.02  | 0.00  | 0.00  | -0.03 |
| 56 | 1 | 0.03  | -0.01 | 0.00  | -0.03 | 0.00  | 0.04  | 0.02  | 0.01  | -0.05 |
| 57 | 6 | -0.01 | 0.01  | 0.01  | 0.02  | 0.00  | -0.02 | -0.02 | -0.02 | 0.02  |
| 58 | 1 | -0.03 | 0.02  | 0.00  | 0.02  | 0.00  | -0.03 | 0.00  | -0.02 | 0.03  |
| 59 | 8 | -0.04 | 0.01  | 0.00  | 0.04  | -0.09 | 0.01  | -0.01 | 0.07  | 0.00  |
| 60 | 8 | -0.03 | -0.01 | 0.00  | 0.01  | 0.00  | 0.00  | 0.08  | 0.03  | 0.03  |
| 61 | 8 | -0.01 | 0.01  | 0.04  | 0.12  | -0.06 | -0.12 | -0.17 | 0.07  | 0.16  |
| 62 | 6 | -0.02 | 0.01  | 0.00  | 0.01  | 0.00  | 0.01  | 0.02  | 0.02  | 0.03  |



|    |   |       |       |       |       |       |       |       |       |       |
|----|---|-------|-------|-------|-------|-------|-------|-------|-------|-------|
| 63 | 6 | -0.01 | 0.02  | -0.03 | 0.01  | -0.01 | 0.01  | -0.02 | 0.03  | -0.01 |
| 64 | 6 | 0.02  | 0.00  | 0.00  | -0.01 | 0.00  | 0.00  | 0.02  | -0.02 | -0.01 |
| 65 | 8 | 0.01  | 0.03  | 0.00  | -0.01 | -0.02 | 0.00  | -0.01 | -0.02 | 0.02  |
| 66 | 1 | 0.04  | -0.01 | 0.02  | -0.02 | 0.01  | -0.01 | 0.03  | -0.05 | 0.01  |
| 67 | 6 | 0.00  | 0.00  | 0.00  | 0.00  | 0.00  | 0.00  | -0.01 | -0.03 | -0.01 |
| 68 | 1 | -0.01 | -0.01 | -0.01 | 0.00  | 0.00  | 0.00  | -0.03 | -0.06 | -0.01 |
| 69 | 1 | 0.00  | 0.03  | 0.01  | 0.00  | -0.01 | 0.00  | -0.02 | 0.00  | 0.01  |
| 70 | 1 | -0.01 | 0.00  | 0.00  | 0.01  | 0.00  | 0.00  | -0.03 | -0.02 | 0.01  |
| 71 | 6 | 0.01  | -0.01 | -0.01 | 0.00  | 0.01  | 0.00  | -0.01 | 0.00  | 0.01  |
| 72 | 1 | 0.02  | -0.02 | 0.00  | -0.01 | 0.01  | 0.00  | 0.01  | -0.02 | 0.01  |
| 73 | 1 | 0.04  | -0.02 | -0.03 | -0.03 | 0.02  | 0.02  | 0.03  | -0.02 | -0.01 |
| 74 | 1 | -0.01 | -0.01 | 0.02  | 0.00  | 0.01  | -0.02 | -0.03 | -0.01 | 0.05  |

|                | 52       | 53       | 54       |
|----------------|----------|----------|----------|
|                | A        | A        | A        |
| Frequencies -- | 536.6383 | 549.5733 | 558.9915 |
| Red. masses -- | 5.2016   | 4.1935   | 4.6894   |
| Frc consts --  | 0.8826   | 0.7462   | 0.8633   |
| IR Inten --    | 25.1977  | 3.8923   | 11.2653  |
| Raman Activ -- | 1.1212   | 7.7962   | 7.5778   |
| Depolar (P) -- | 0.4880   | 0.0515   | 0.6840   |
| Depolar (U) -- | 0.6559   | 0.0979   | 0.8124   |

| Atom | AN | X     | Y     | Z     | X     | Y     | Z     | X     | Y     | Z     |
|------|----|-------|-------|-------|-------|-------|-------|-------|-------|-------|
| 1    | 6  | -0.01 | -0.03 | -0.04 | 0.05  | -0.06 | -0.01 | -0.03 | 0.03  | 0.01  |
| 2    | 6  | 0.00  | -0.02 | -0.04 | 0.03  | -0.04 | 0.01  | 0.00  | -0.01 | -0.02 |
| 3    | 6  | 0.00  | -0.08 | -0.01 | 0.00  | -0.01 | -0.11 | -0.02 | 0.00  | 0.15  |
| 4    | 6  | 0.06  | -0.02 | -0.03 | 0.07  | 0.08  | 0.05  | -0.08 | 0.05  | -0.01 |
| 5    | 6  | 0.08  | 0.09  | 0.02  | 0.04  | 0.01  | 0.03  | -0.06 | -0.02 | -0.03 |
| 6    | 6  | 0.16  | -0.02 | 0.13  | 0.05  | -0.03 | 0.00  | -0.06 | -0.01 | -0.05 |
| 7    | 8  | -0.05 | 0.01  | 0.07  | -0.04 | -0.01 | 0.04  | -0.01 | -0.01 | 0.01  |
| 8    | 6  | -0.01 | 0.01  | 0.04  | -0.03 | 0.03  | 0.04  | 0.08  | -0.03 | -0.04 |
| 9    | 6  | 0.00  | 0.01  | -0.02 | -0.05 | -0.02 | -0.07 | -0.02 | 0.03  | 0.01  |
| 10   | 1  | 0.01  | -0.02 | -0.03 | -0.04 | -0.13 | -0.09 | -0.03 | 0.02  | 0.01  |
| 11   | 8  | 0.00  | 0.03  | 0.00  | 0.00  | -0.02 | -0.01 | -0.03 | 0.04  | 0.03  |
| 12   | 6  | 0.03  | -0.01 | -0.02 | 0.06  | 0.13  | 0.02  | -0.02 | 0.09  | 0.02  |
| 13   | 1  | 0.02  | -0.02 | 0.00  | 0.17  | 0.15  | 0.01  | 0.01  | 0.05  | 0.07  |
| 14   | 6  | 0.02  | 0.01  | 0.00  | 0.01  | -0.01 | -0.01 | -0.02 | 0.00  | 0.01  |
| 15   | 8  | -0.03 | 0.00  | -0.04 | 0.00  | 0.00  | -0.01 | 0.00  | 0.00  | 0.01  |
| 16   | 6  | 0.03  | -0.01 | 0.01  | 0.00  | -0.01 | -0.02 | 0.07  | -0.01 | 0.05  |
| 17   | 1  | -0.01 | 0.00  | -0.05 | -0.06 | -0.01 | -0.11 | 0.13  | -0.03 | 0.14  |
| 18   | 1  | 0.08  | -0.02 | 0.01  | 0.11  | -0.04 | 0.00  | -0.02 | 0.02  | 0.03  |
| 19   | 1  | 0.05  | -0.01 | -0.01 | 0.01  | -0.02 | -0.08 | 0.03  | 0.00  | 0.11  |
| 20   | 6  | -0.04 | 0.01  | -0.02 | -0.06 | -0.03 | -0.06 | 0.02  | 0.01  | -0.02 |
| 21   | 1  | -0.01 | 0.01  | -0.04 | -0.06 | -0.11 | -0.09 | 0.04  | 0.01  | -0.04 |
| 22   | 6  | -0.04 | 0.03  | -0.05 | 0.05  | -0.05 | 0.05  | -0.03 | 0.02  | -0.01 |
| 23   | 1  | -0.02 | 0.01  | 0.02  | 0.06  | -0.05 | 0.08  | -0.03 | 0.01  | -0.01 |
| 24   | 1  | -0.08 | 0.07  | -0.07 | 0.03  | -0.04 | 0.06  | -0.03 | 0.01  | -0.01 |
| 25   | 1  | -0.06 | 0.05  | -0.01 | 0.04  | -0.04 | 0.05  | -0.04 | 0.03  | -0.02 |
| 26   | 6  | 0.23  | -0.03 | 0.04  | -0.10 | -0.07 | -0.01 | 0.07  | 0.00  | 0.01  |
| 27   | 1  | 0.02  | 0.05  | 0.13  | -0.08 | 0.02  | -0.07 | 0.05  | -0.14 | 0.09  |
| 28   | 1  | 0.43  | -0.08 | 0.12  | -0.20 | -0.06 | -0.06 | 0.18  | 0.04  | 0.09  |
| 29   | 6  | -0.02 | 0.01  | 0.01  | -0.01 | 0.01  | 0.01  | -0.03 | 0.03  | 0.02  |
| 30   | 1  | -0.04 | -0.03 | 0.02  | 0.00  | 0.00  | 0.00  | -0.09 | -0.02 | 0.05  |

|    |   |       |       |       |       |       |       |       |       |       |
|----|---|-------|-------|-------|-------|-------|-------|-------|-------|-------|
| 31 | 1 | -0.02 | 0.01  | -0.03 | 0.00  | -0.01 | 0.00  | -0.08 | 0.12  | -0.02 |
| 32 | 6 | 0.00  | 0.04  | 0.03  | 0.03  | 0.05  | 0.08  | 0.02  | -0.05 | -0.12 |
| 33 | 1 | 0.01  | 0.09  | 0.04  | 0.07  | 0.07  | 0.11  | -0.06 | -0.02 | -0.18 |
| 34 | 6 | 0.02  | 0.01  | -0.04 | -0.01 | 0.07  | 0.00  | 0.03  | -0.06 | -0.08 |
| 35 | 1 | 0.06  | 0.06  | -0.09 | 0.02  | 0.14  | -0.07 | -0.05 | -0.07 | -0.07 |
| 36 | 6 | -0.01 | 0.01  | -0.03 | 0.02  | 0.00  | 0.11  | -0.01 | -0.02 | -0.09 |
| 37 | 1 | -0.07 | 0.03  | -0.09 | -0.01 | -0.01 | 0.12  | 0.08  | -0.08 | 0.06  |
| 38 | 1 | -0.05 | 0.03  | -0.04 | -0.06 | 0.00  | 0.02  | 0.05  | -0.07 | -0.13 |
| 39 | 1 | -0.02 | 0.03  | 0.07  | 0.01  | -0.04 | 0.19  | 0.00  | -0.06 | -0.23 |
| 40 | 6 | 0.13  | -0.11 | -0.12 | -0.09 | -0.12 | 0.00  | 0.09  | 0.09  | 0.01  |
| 41 | 1 | 0.15  | -0.19 | -0.02 | -0.13 | -0.18 | 0.05  | 0.15  | 0.20  | -0.09 |
| 42 | 6 | -0.05 | -0.06 | 0.15  | -0.02 | 0.00  | 0.00  | 0.01  | 0.01  | -0.05 |
| 43 | 1 | -0.17 | -0.08 | 0.28  | -0.07 | 0.02  | 0.03  | 0.04  | 0.05  | -0.10 |
| 44 | 1 | -0.12 | -0.06 | 0.15  | -0.09 | 0.00  | 0.06  | 0.07  | 0.01  | -0.04 |
| 45 | 1 | -0.09 | -0.01 | -0.04 | -0.03 | 0.07  | -0.10 | 0.02  | -0.03 | 0.02  |
| 46 | 6 | 0.01  | 0.07  | 0.03  | -0.01 | 0.01  | 0.01  | 0.03  | -0.02 | 0.00  |
| 47 | 1 | -0.09 | -0.01 | 0.23  | -0.03 | -0.01 | 0.05  | 0.12  | -0.01 | -0.08 |
| 48 | 6 | 0.01  | 0.04  | 0.03  | 0.00  | 0.01  | 0.00  | 0.03  | 0.00  | 0.02  |
| 49 | 1 | 0.02  | -0.07 | 0.08  | -0.01 | -0.11 | 0.04  | 0.05  | 0.07  | 0.02  |
| 50 | 1 | -0.12 | 0.08  | 0.05  | -0.07 | 0.09  | 0.08  | 0.08  | -0.03 | -0.01 |
| 51 | 6 | 0.07  | -0.01 | 0.03  | 0.06  | 0.02  | -0.04 | -0.04 | -0.01 | 0.02  |
| 52 | 1 | 0.02  | 0.01  | 0.03  | 0.06  | 0.03  | -0.03 | -0.03 | -0.01 | 0.03  |
| 53 | 6 | -0.04 | 0.02  | 0.01  | -0.03 | 0.00  | 0.02  | 0.02  | -0.01 | -0.02 |
| 54 | 1 | -0.07 | 0.02  | 0.01  | -0.05 | 0.00  | 0.03  | 0.05  | -0.01 | -0.04 |
| 55 | 6 | -0.01 | 0.00  | -0.04 | 0.01  | 0.00  | -0.02 | -0.01 | 0.00  | 0.01  |
| 56 | 1 | 0.02  | -0.02 | -0.06 | 0.03  | 0.00  | -0.04 | -0.03 | 0.01  | 0.03  |
| 57 | 6 | -0.05 | 0.00  | 0.00  | -0.02 | 0.00  | 0.02  | 0.02  | 0.00  | -0.02 |
| 58 | 1 | -0.08 | 0.01  | 0.00  | -0.03 | 0.00  | 0.04  | 0.05  | -0.01 | -0.04 |
| 59 | 8 | -0.24 | 0.01  | 0.04  | 0.07  | 0.04  | -0.07 | -0.10 | -0.13 | 0.07  |
| 60 | 8 | 0.00  | 0.00  | 0.00  | 0.03  | 0.11  | 0.01  | 0.07  | 0.16  | 0.03  |
| 61 | 8 | -0.11 | -0.01 | -0.15 | -0.05 | 0.00  | -0.01 | 0.01  | 0.00  | 0.04  |
| 62 | 6 | 0.00  | 0.00  | 0.01  | 0.07  | 0.00  | -0.10 | 0.10  | 0.03  | -0.08 |
| 63 | 6 | 0.00  | 0.00  | 0.00  | 0.07  | -0.12 | 0.11  | 0.06  | -0.11 | 0.12  |
| 64 | 6 | 0.00  | 0.00  | 0.00  | -0.09 | -0.01 | 0.06  | -0.08 | -0.03 | 0.05  |
| 65 | 8 | 0.00  | 0.00  | 0.01  | -0.01 | -0.04 | -0.12 | -0.02 | -0.08 | -0.12 |
| 66 | 1 | 0.00  | 0.00  | -0.01 | -0.21 | 0.07  | -0.06 | -0.21 | 0.04  | -0.07 |
| 67 | 6 | 0.00  | 0.00  | 0.00  | -0.01 | -0.02 | -0.01 | -0.02 | -0.04 | -0.02 |
| 68 | 1 | 0.00  | -0.01 | 0.00  | 0.06  | 0.11  | 0.01  | 0.03  | 0.06  | 0.00  |
| 69 | 1 | 0.00  | 0.00  | 0.00  | 0.01  | -0.09 | -0.07 | 0.00  | -0.10 | -0.06 |
| 70 | 1 | 0.00  | 0.00  | 0.00  | 0.05  | -0.07 | -0.07 | 0.02  | -0.09 | -0.07 |
| 71 | 6 | 0.00  | 0.00  | 0.00  | -0.02 | 0.04  | 0.05  | -0.04 | 0.04  | 0.07  |
| 72 | 1 | 0.00  | 0.00  | 0.00  | -0.10 | 0.14  | 0.04  | -0.10 | 0.13  | 0.04  |
| 73 | 1 | -0.01 | 0.00  | 0.00  | -0.19 | 0.16  | 0.16  | -0.20 | 0.15  | 0.17  |
| 74 | 1 | 0.00  | 0.00  | 0.00  | 0.11  | 0.09  | -0.18 | 0.08  | 0.08  | -0.16 |

|                | 55       | 56       | 57       |
|----------------|----------|----------|----------|
|                | A        | A        | A        |
| Frequencies -- | 568.3348 | 590.8644 | 604.1472 |
| Red. masses -- | 4.0753   | 3.8546   | 3.8964   |
| Frc consts --  | 0.7756   | 0.7929   | 0.8379   |
| IR Inten --    | 12.0701  | 4.8686   | 18.6913  |
| Raman Activ -- | 2.7424   | 15.7435  | 3.2840   |
| Depolar (P) -- | 0.3156   | 0.0703   | 0.1576   |

|      |    | Depolar (U) -- |       |       | 0.4798 |       |       | 0.1314 |       |       | 0.2723 |   |   |
|------|----|----------------|-------|-------|--------|-------|-------|--------|-------|-------|--------|---|---|
| Atom | AN | X              | Y     | Z     | X      | Y     | Z     | X      | Y     | Z     | X      | Y | Z |
| 1    | 6  | 0.05           | -0.06 | -0.06 | -0.02  | 0.01  | 0.00  | 0.00   | 0.03  | 0.04  |        |   |   |
| 2    | 6  | 0.02           | -0.09 | -0.07 | -0.03  | 0.05  | 0.02  | 0.04   | 0.00  | 0.02  |        |   |   |
| 3    | 6  | 0.08           | -0.06 | 0.04  | 0.01   | -0.01 | -0.02 | -0.02  | 0.03  | 0.03  |        |   |   |
| 4    | 6  | 0.02           | -0.07 | -0.03 | 0.04   | -0.07 | -0.05 | -0.02  | 0.07  | 0.00  |        |   |   |
| 5    | 6  | -0.02          | -0.07 | 0.00  | 0.06   | -0.03 | 0.04  | 0.03   | 0.00  | 0.02  |        |   |   |
| 6    | 6  | -0.07          | 0.06  | -0.01 | 0.05   | 0.09  | 0.10  | 0.05   | 0.01  | 0.06  |        |   |   |
| 7    | 8  | -0.09          | -0.04 | 0.11  | 0.05   | 0.01  | -0.03 | 0.01   | 0.01  | -0.03 |        |   |   |
| 8    | 6  | -0.08          | 0.05  | 0.11  | 0.00   | 0.00  | -0.03 | 0.02   | -0.05 | 0.01  |        |   |   |
| 9    | 6  | -0.04          | 0.00  | -0.08 | 0.07   | -0.03 | 0.06  | -0.12  | 0.07  | -0.08 |        |   |   |
| 10   | 1  | -0.01          | -0.09 | -0.12 | 0.06   | 0.05  | 0.08  | -0.15  | -0.03 | -0.08 |        |   |   |
| 11   | 8  | 0.07           | 0.01  | -0.04 | -0.03  | -0.04 | 0.00  | 0.01   | 0.07  | 0.03  |        |   |   |
| 12   | 6  | 0.00           | -0.01 | -0.01 | 0.04   | -0.05 | -0.01 | -0.06  | 0.10  | -0.04 |        |   |   |
| 13   | 1  | -0.02          | -0.05 | 0.02  | 0.03   | -0.09 | 0.03  | -0.08  | 0.11  | -0.06 |        |   |   |
| 14   | 6  | -0.02          | 0.01  | 0.01  | 0.03   | 0.01  | -0.02 | 0.07   | -0.01 | -0.06 |        |   |   |
| 15   | 8  | 0.00           | 0.00  | 0.01  | -0.01  | -0.01 | -0.03 | 0.01   | 0.00  | -0.02 |        |   |   |
| 16   | 6  | 0.00           | 0.00  | -0.03 | -0.04  | 0.01  | -0.01 | 0.06   | -0.01 | 0.03  |        |   |   |
| 17   | 1  | -0.13          | 0.03  | -0.22 | 0.00   | 0.00  | 0.05  | 0.03   | 0.02  | 0.00  |        |   |   |
| 18   | 1  | 0.20           | -0.06 | 0.01  | -0.09  | 0.01  | -0.01 | 0.05   | 0.02  | 0.01  |        |   |   |
| 19   | 1  | 0.06           | -0.03 | -0.14 | -0.06  | 0.01  | 0.01  | 0.13   | 0.00  | 0.07  |        |   |   |
| 20   | 6  | -0.11          | 0.00  | -0.07 | 0.06   | -0.01 | 0.06  | -0.06  | 0.02  | -0.07 |        |   |   |
| 21   | 1  | -0.09          | -0.06 | -0.10 | 0.03   | 0.06  | 0.10  | -0.02  | -0.09 | -0.14 |        |   |   |
| 22   | 6  | -0.01          | -0.01 | 0.02  | -0.02  | 0.02  | -0.03 | 0.03   | -0.04 | 0.05  |        |   |   |
| 23   | 1  | 0.02           | -0.07 | 0.17  | -0.02  | 0.05  | -0.06 | 0.00   | -0.07 | 0.00  |        |   |   |
| 24   | 1  | -0.09          | 0.04  | -0.01 | -0.01  | 0.04  | -0.05 | 0.08   | -0.11 | 0.10  |        |   |   |
| 25   | 1  | -0.10          | 0.05  | 0.02  | 0.02   | 0.01  | 0.00  | -0.01  | -0.04 | -0.01 |        |   |   |
| 26   | 6  | 0.02           | 0.13  | 0.00  | -0.01  | 0.20  | 0.01  | -0.06  | 0.04  | 0.01  |        |   |   |
| 27   | 1  | 0.05           | 0.05  | 0.02  | 0.10   | 0.37  | -0.14 | 0.06   | 0.18  | -0.13 |        |   |   |
| 28   | 1  | 0.05           | 0.14  | 0.02  | -0.20  | 0.09  | -0.14 | -0.21  | -0.04 | -0.12 |        |   |   |
| 29   | 6  | 0.02           | -0.02 | -0.02 | 0.00   | 0.00  | 0.00  | -0.02  | -0.01 | 0.04  |        |   |   |
| 30   | 1  | 0.03           | -0.05 | -0.04 | 0.03   | 0.03  | -0.01 | -0.07  | -0.05 | 0.06  |        |   |   |
| 31   | 1  | 0.05           | -0.10 | -0.07 | 0.01   | 0.00  | 0.05  | -0.04  | 0.02  | -0.03 |        |   |   |
| 32   | 6  | 0.02           | 0.13  | 0.14  | -0.02  | -0.01 | -0.01 | 0.01   | -0.06 | -0.06 |        |   |   |
| 33   | 1  | 0.10           | 0.25  | 0.22  | -0.01  | -0.09 | -0.01 | -0.07  | 0.00  | -0.11 |        |   |   |
| 34   | 6  | 0.05           | 0.08  | -0.08 | -0.02  | 0.00  | 0.07  | 0.00   | -0.05 | -0.05 |        |   |   |
| 35   | 1  | 0.19           | 0.23  | -0.22 | 0.00   | -0.07 | 0.14  | -0.14  | -0.04 | -0.06 |        |   |   |
| 36   | 6  | -0.01          | -0.01 | -0.04 | -0.02  | 0.01  | -0.08 | -0.02  | -0.01 | -0.04 |        |   |   |
| 37   | 1  | -0.02          | 0.02  | -0.09 | -0.08  | 0.04  | -0.17 | 0.00   | -0.06 | 0.06  |        |   |   |
| 38   | 1  | -0.02          | 0.02  | -0.01 | -0.05  | 0.04  | -0.05 | -0.03  | -0.05 | -0.14 |        |   |   |
| 39   | 1  | -0.02          | 0.00  | -0.02 | -0.03  | 0.04  | 0.02  | -0.02  | -0.05 | -0.06 |        |   |   |
| 40   | 6  | 0.02           | 0.13  | 0.02  | -0.07  | 0.09  | 0.06  | -0.06  | 0.05  | 0.05  |        |   |   |
| 41   | 1  | -0.04          | 0.13  | 0.01  | -0.15  | 0.09  | 0.02  | -0.07  | 0.12  | -0.03 |        |   |   |
| 42   | 6  | 0.01           | 0.00  | -0.03 | -0.03  | -0.05 | 0.08  | -0.04  | -0.03 | 0.07  |        |   |   |
| 43   | 1  | 0.06           | -0.06 | -0.05 | -0.10  | -0.18 | 0.22  | -0.11  | -0.07 | 0.16  |        |   |   |
| 44   | 1  | 0.09           | -0.01 | -0.17 | -0.02  | -0.06 | -0.12 | -0.10  | -0.04 | 0.05  |        |   |   |
| 45   | 1  | 0.02           | -0.11 | 0.09  | -0.06  | -0.13 | 0.04  | -0.06  | 0.00  | -0.04 |        |   |   |
| 46   | 6  | 0.03           | -0.04 | -0.05 | 0.09   | -0.01 | -0.08 | 0.04   | 0.00  | -0.03 |        |   |   |
| 47   | 1  | 0.06           | 0.00  | -0.13 | 0.04   | 0.00  | -0.05 | 0.03   | -0.01 | -0.01 |        |   |   |
| 48   | 6  | 0.00           | -0.06 | -0.02 | 0.06   | -0.14 | -0.03 | 0.04   | -0.05 | -0.02 |        |   |   |
| 49   | 1  | 0.06           | 0.07  | -0.01 | 0.14   | -0.12 | 0.05  | 0.05   | -0.19 | 0.04  |        |   |   |
| 50   | 1  | 0.02           | -0.14 | -0.11 | -0.09  | -0.20 | -0.13 | -0.08  | 0.03  | 0.05  |        |   |   |

|    |   |       |       |       |       |       |       |       |       |       |
|----|---|-------|-------|-------|-------|-------|-------|-------|-------|-------|
| 51 | 6 | -0.08 | -0.04 | 0.05  | 0.02  | -0.11 | 0.03  | 0.08  | -0.02 | -0.06 |
| 52 | 1 | -0.07 | -0.08 | 0.02  | 0.00  | -0.18 | -0.05 | 0.05  | -0.02 | -0.09 |
| 53 | 6 | 0.04  | 0.00  | -0.02 | -0.01 | 0.03  | 0.02  | -0.05 | 0.01  | 0.05  |
| 54 | 1 | 0.07  | 0.00  | -0.02 | -0.02 | 0.04  | 0.05  | -0.11 | 0.02  | 0.10  |
| 55 | 6 | 0.00  | 0.00  | 0.02  | 0.00  | 0.00  | -0.01 | 0.01  | 0.00  | -0.02 |
| 56 | 1 | -0.03 | 0.00  | 0.06  | 0.01  | -0.03 | -0.01 | 0.05  | -0.01 | -0.06 |
| 57 | 6 | 0.03  | 0.01  | -0.02 | -0.03 | 0.02  | 0.00  | -0.05 | 0.01  | 0.04  |
| 58 | 1 | 0.04  | 0.01  | -0.05 | -0.10 | 0.03  | 0.01  | -0.16 | 0.02  | 0.15  |
| 59 | 8 | 0.00  | -0.01 | 0.05  | 0.04  | -0.02 | 0.00  | 0.03  | -0.05 | -0.02 |
| 60 | 8 | 0.07  | 0.01  | 0.00  | -0.05 | 0.06  | 0.03  | 0.12  | -0.01 | -0.06 |
| 61 | 8 | -0.04 | 0.01  | 0.07  | -0.13 | -0.01 | -0.02 | -0.02 | -0.02 | -0.03 |
| 62 | 6 | 0.02  | 0.01  | 0.03  | 0.02  | 0.01  | -0.06 | 0.01  | 0.04  | 0.09  |
| 63 | 6 | -0.01 | 0.03  | 0.00  | 0.02  | -0.06 | 0.03  | 0.00  | 0.11  | 0.01  |
| 64 | 6 | 0.02  | -0.01 | -0.02 | -0.04 | -0.01 | 0.04  | 0.08  | 0.00  | -0.08 |
| 65 | 8 | -0.01 | -0.03 | 0.03  | 0.01  | 0.01  | -0.07 | -0.03 | -0.10 | 0.10  |
| 66 | 1 | 0.03  | -0.03 | 0.00  | -0.08 | 0.04  | -0.01 | 0.08  | -0.08 | -0.05 |
| 67 | 6 | -0.01 | -0.02 | 0.00  | 0.00  | 0.00  | 0.00  | -0.01 | -0.03 | -0.01 |
| 68 | 1 | -0.03 | -0.06 | -0.01 | 0.03  | 0.08  | 0.01  | -0.10 | -0.22 | -0.04 |
| 69 | 1 | -0.01 | 0.00  | 0.02  | 0.01  | -0.03 | -0.04 | -0.04 | 0.04  | 0.09  |
| 70 | 1 | -0.02 | 0.00  | 0.02  | 0.02  | -0.04 | -0.05 | -0.06 | 0.05  | 0.09  |
| 71 | 6 | -0.01 | 0.00  | 0.01  | 0.00  | 0.01  | 0.01  | -0.04 | -0.01 | 0.04  |
| 72 | 1 | 0.01  | -0.02 | 0.00  | -0.04 | 0.06  | 0.03  | 0.04  | -0.10 | -0.06 |
| 73 | 1 | 0.01  | -0.02 | -0.01 | -0.05 | 0.08  | 0.04  | -0.03 | -0.10 | 0.02  |
| 74 | 1 | -0.04 | -0.01 | 0.05  | 0.06  | 0.04  | -0.10 | -0.16 | -0.06 | 0.18  |

|                |  |          |  |          |  |          |
|----------------|--|----------|--|----------|--|----------|
|                |  | 58       |  | 59       |  | 60       |
|                |  | A        |  | A        |  | A        |
| Frequencies -- |  | 615.6735 |  | 617.9459 |  | 632.3475 |
| Red. masses -- |  | 3.4293   |  | 3.5879   |  | 4.2907   |
| Frc consts --  |  | 0.7659   |  | 0.8072   |  | 1.0109   |
| IR Inten --    |  | 10.3745  |  | 19.3158  |  | 14.1346  |
| Raman Activ -- |  | 2.8885   |  | 4.5248   |  | 5.0542   |
| Depolar (P) -- |  | 0.4934   |  | 0.4201   |  | 0.4696   |
| Depolar (U) -- |  | 0.6607   |  | 0.5917   |  | 0.6391   |

| Atom | AN | X     | Y     | Z     | X     | Y     | Z     | X     | Y     | Z     |
|------|----|-------|-------|-------|-------|-------|-------|-------|-------|-------|
| 1    | 6  | -0.02 | -0.02 | -0.01 | -0.02 | -0.02 | 0.00  | -0.07 | -0.05 | 0.03  |
| 2    | 6  | -0.04 | -0.03 | -0.04 | -0.04 | -0.03 | -0.04 | -0.07 | -0.05 | -0.04 |
| 3    | 6  | 0.00  | 0.02  | 0.06  | -0.01 | 0.03  | 0.06  | -0.08 | 0.07  | 0.03  |
| 4    | 6  | -0.01 | 0.01  | -0.02 | -0.01 | 0.02  | -0.01 | -0.04 | 0.17  | 0.03  |
| 5    | 6  | -0.02 | -0.03 | 0.00  | -0.01 | -0.02 | 0.00  | 0.01  | 0.09  | -0.03 |
| 6    | 6  | -0.01 | -0.03 | 0.01  | 0.00  | -0.03 | 0.01  | 0.02  | -0.04 | -0.03 |
| 7    | 8  | -0.03 | -0.03 | 0.04  | -0.03 | -0.03 | 0.04  | -0.06 | -0.06 | 0.07  |
| 8    | 6  | -0.01 | 0.03  | 0.00  | -0.01 | 0.03  | -0.01 | 0.02  | 0.04  | -0.04 |
| 9    | 6  | 0.05  | -0.03 | 0.03  | 0.04  | -0.02 | 0.03  | 0.04  | -0.03 | 0.04  |
| 10   | 1  | 0.06  | 0.04  | 0.04  | 0.04  | 0.04  | 0.04  | 0.00  | 0.10  | 0.09  |
| 11   | 8  | 0.00  | -0.04 | -0.02 | 0.00  | -0.03 | -0.02 | -0.01 | -0.07 | -0.03 |
| 12   | 6  | 0.02  | -0.02 | -0.01 | 0.02  | -0.01 | -0.01 | 0.02  | 0.09  | -0.04 |
| 13   | 1  | 0.04  | -0.02 | -0.01 | 0.04  | 0.00  | -0.02 | 0.10  | 0.18  | -0.13 |
| 14   | 6  | 0.09  | -0.03 | -0.11 | 0.03  | -0.02 | -0.05 | -0.04 | 0.02  | 0.07  |
| 15   | 8  | 0.15  | -0.02 | -0.11 | -0.13 | 0.03  | 0.16  | -0.02 | -0.01 | -0.04 |
| 16   | 6  | -0.03 | 0.01  | -0.02 | -0.03 | 0.01  | -0.02 | -0.05 | 0.01  | -0.03 |
| 17   | 1  | -0.02 | -0.02 | 0.00  | -0.01 | -0.02 | 0.00  | 0.02  | -0.05 | 0.06  |
| 18   | 1  | -0.03 | -0.01 | 0.00  | -0.03 | -0.01 | 0.00  | -0.08 | -0.01 | -0.01 |

|    |   |       |       |       |       |       |       |       |       |       |
|----|---|-------|-------|-------|-------|-------|-------|-------|-------|-------|
| 19 | 1 | -0.08 | 0.00  | -0.04 | -0.07 | 0.00  | -0.03 | -0.16 | 0.00  | -0.04 |
| 20 | 6 | 0.03  | -0.03 | 0.05  | 0.03  | -0.03 | 0.04  | 0.06  | -0.07 | 0.09  |
| 21 | 1 | 0.01  | 0.02  | 0.08  | 0.01  | 0.01  | 0.07  | 0.03  | -0.03 | 0.12  |
| 22 | 6 | -0.01 | 0.02  | -0.01 | -0.01 | 0.01  | 0.00  | 0.01  | 0.00  | 0.02  |
| 23 | 1 | 0.01  | 0.05  | 0.01  | 0.01  | 0.05  | 0.00  | 0.04  | 0.12  | -0.05 |
| 24 | 1 | -0.04 | 0.06  | -0.05 | -0.02 | 0.06  | -0.04 | 0.02  | 0.08  | -0.05 |
| 25 | 1 | 0.03  | 0.01  | 0.04  | 0.04  | 0.00  | 0.04  | 0.17  | -0.06 | 0.13  |
| 26 | 6 | -0.02 | -0.03 | 0.00  | -0.02 | -0.02 | 0.00  | -0.03 | -0.07 | 0.00  |
| 27 | 1 | 0.05  | -0.04 | -0.03 | 0.05  | -0.01 | -0.05 | 0.02  | -0.03 | -0.05 |
| 28 | 1 | -0.02 | -0.08 | -0.02 | -0.05 | -0.08 | -0.04 | -0.11 | -0.07 | -0.04 |
| 29 | 6 | 0.01  | 0.01  | -0.02 | 0.01  | 0.01  | -0.01 | 0.01  | 0.02  | -0.02 |
| 30 | 1 | 0.04  | 0.03  | -0.03 | 0.04  | 0.03  | -0.03 | 0.06  | 0.07  | -0.04 |
| 31 | 1 | 0.03  | -0.01 | 0.02  | 0.02  | -0.01 | 0.02  | 0.03  | 0.02  | 0.05  |
| 32 | 6 | 0.03  | 0.06  | 0.01  | 0.03  | 0.05  | 0.00  | 0.08  | 0.09  | -0.04 |
| 33 | 1 | 0.09  | 0.06  | 0.06  | 0.09  | 0.06  | 0.05  | 0.18  | 0.06  | 0.03  |
| 34 | 6 | 0.04  | 0.04  | -0.03 | 0.04  | 0.04  | -0.03 | 0.07  | 0.07  | -0.05 |
| 35 | 1 | 0.14  | 0.05  | -0.04 | 0.13  | 0.04  | -0.04 | 0.20  | 0.07  | -0.05 |
| 36 | 6 | -0.02 | 0.00  | -0.06 | -0.02 | 0.00  | -0.06 | 0.00  | 0.00  | -0.03 |
| 37 | 1 | 0.00  | -0.02 | -0.02 | 0.00  | -0.03 | -0.01 | 0.07  | -0.10 | 0.18  |
| 38 | 1 | -0.01 | -0.02 | -0.08 | -0.01 | -0.03 | -0.10 | 0.01  | -0.09 | -0.19 |
| 39 | 1 | -0.02 | -0.02 | -0.08 | -0.02 | -0.02 | -0.08 | 0.00  | -0.08 | -0.11 |
| 40 | 6 | 0.02  | 0.09  | 0.01  | 0.01  | 0.08  | 0.02  | -0.03 | -0.02 | 0.03  |
| 41 | 1 | 0.06  | 0.17  | -0.05 | 0.04  | 0.17  | -0.05 | 0.02  | 0.08  | -0.05 |
| 42 | 6 | -0.03 | -0.01 | 0.04  | -0.02 | -0.02 | 0.04  | 0.03  | 0.02  | -0.03 |
| 43 | 1 | -0.06 | 0.01  | 0.05  | -0.06 | 0.00  | 0.07  | 0.05  | 0.08  | -0.08 |
| 44 | 1 | -0.07 | -0.01 | 0.10  | -0.08 | -0.01 | 0.10  | 0.02  | 0.02  | 0.07  |
| 45 | 1 | -0.03 | 0.04  | -0.03 | -0.03 | 0.04  | -0.03 | 0.04  | 0.06  | -0.01 |
| 46 | 6 | -0.03 | -0.02 | -0.01 | -0.02 | -0.02 | -0.01 | 0.07  | 0.03  | 0.06  |
| 47 | 1 | 0.00  | -0.02 | -0.05 | 0.00  | -0.01 | -0.03 | 0.08  | 0.01  | 0.10  |
| 48 | 6 | -0.03 | 0.05  | -0.02 | -0.02 | 0.03  | -0.02 | 0.12  | -0.07 | 0.05  |
| 49 | 1 | -0.07 | -0.14 | 0.02  | -0.05 | -0.16 | 0.01  | 0.13  | 0.04  | 0.02  |
| 50 | 1 | -0.06 | 0.21  | 0.16  | -0.06 | 0.17  | 0.14  | 0.11  | -0.19 | -0.08 |
| 51 | 6 | 0.05  | 0.08  | -0.12 | 0.06  | 0.06  | -0.11 | 0.03  | -0.11 | 0.09  |
| 52 | 1 | 0.01  | 0.13  | -0.09 | 0.03  | 0.10  | -0.09 | 0.05  | -0.16 | 0.05  |
| 53 | 6 | -0.01 | -0.03 | 0.01  | -0.13 | 0.00  | 0.13  | 0.04  | 0.02  | -0.06 |
| 54 | 1 | -0.13 | -0.01 | 0.12  | -0.14 | 0.00  | 0.13  | 0.09  | 0.01  | -0.12 |
| 55 | 6 | -0.07 | 0.01  | 0.09  | 0.16  | -0.02 | -0.15 | -0.05 | 0.00  | 0.01  |
| 56 | 1 | -0.22 | 0.06  | 0.22  | 0.47  | -0.05 | -0.46 | -0.11 | -0.02 | 0.09  |
| 57 | 6 | -0.12 | 0.01  | 0.15  | 0.08  | -0.02 | -0.06 | 0.00  | 0.00  | -0.03 |
| 58 | 1 | -0.38 | 0.05  | 0.47  | 0.19  | -0.04 | -0.13 | 0.06  | -0.01 | -0.16 |
| 59 | 8 | -0.01 | -0.03 | 0.02  | 0.00  | -0.03 | 0.01  | 0.02  | -0.05 | -0.03 |
| 60 | 8 | -0.04 | 0.00  | 0.01  | -0.03 | 0.00  | 0.00  | -0.03 | -0.04 | -0.05 |
| 61 | 8 | 0.05  | -0.02 | 0.03  | 0.03  | -0.01 | 0.02  | -0.10 | 0.04  | -0.04 |
| 62 | 6 | -0.01 | -0.01 | -0.01 | -0.01 | 0.00  | 0.00  | -0.07 | 0.01  | 0.04  |
| 63 | 6 | 0.00  | -0.02 | 0.00  | 0.00  | -0.01 | 0.00  | 0.02  | 0.04  | 0.01  |
| 64 | 6 | -0.01 | 0.00  | 0.01  | 0.00  | 0.00  | 0.00  | 0.05  | 0.01  | -0.04 |
| 65 | 8 | 0.01  | 0.02  | -0.01 | 0.01  | 0.01  | 0.00  | 0.01  | -0.03 | 0.06  |
| 66 | 1 | -0.01 | 0.02  | 0.01  | 0.00  | 0.01  | 0.00  | 0.03  | -0.01 | -0.05 |
| 67 | 6 | 0.00  | 0.01  | 0.00  | 0.00  | 0.01  | 0.00  | 0.01  | 0.01  | 0.00  |
| 68 | 1 | 0.02  | 0.04  | 0.01  | 0.01  | 0.02  | 0.00  | -0.05 | -0.09 | -0.01 |
| 69 | 1 | 0.01  | 0.00  | -0.01 | 0.00  | 0.00  | 0.00  | -0.01 | 0.05  | 0.06  |
| 70 | 1 | 0.01  | -0.01 | -0.01 | 0.00  | 0.00  | 0.00  | -0.02 | 0.05  | 0.05  |

|    |   |      |      |       |      |      |       |       |       |       |
|----|---|------|------|-------|------|------|-------|-------|-------|-------|
| 71 | 6 | 0.01 | 0.00 | -0.01 | 0.00 | 0.00 | -0.01 | -0.01 | -0.01 | 0.01  |
| 72 | 1 | 0.00 | 0.01 | 0.01  | 0.00 | 0.00 | 0.00  | 0.03  | -0.05 | -0.06 |
| 73 | 1 | 0.01 | 0.01 | -0.01 | 0.00 | 0.00 | -0.01 | -0.04 | -0.06 | 0.01  |
| 74 | 1 | 0.03 | 0.01 | -0.03 | 0.01 | 0.00 | -0.01 | -0.08 | -0.03 | 0.07  |

|                |          |          |          |
|----------------|----------|----------|----------|
|                | 61       | 62       | 63       |
|                | A        | A        | A        |
| Frequencies -- | 646.7719 | 667.6324 | 685.8912 |
| Red. masses -- | 3.7982   | 4.5623   | 2.6505   |
| Frc consts --  | 0.9361   | 1.1981   | 0.7347   |
| IR Inten --    | 21.9688  | 18.4726  | 10.7183  |
| Raman Activ -- | 1.4420   | 1.8119   | 2.8493   |
| Depolar (P) -- | 0.6676   | 0.4305   | 0.3406   |
| Depolar (U) -- | 0.8006   | 0.6019   | 0.5081   |

| Atom | AN | X     | Y     | Z     | X     | Y     | Z     | X     | Y     | Z     |
|------|----|-------|-------|-------|-------|-------|-------|-------|-------|-------|
| 1    | 6  | 0.01  | -0.03 | -0.04 | -0.01 | 0.00  | 0.00  | -0.03 | -0.01 | 0.01  |
| 2    | 6  | -0.03 | 0.02  | 0.00  | 0.01  | 0.06  | -0.02 | -0.02 | 0.00  | 0.01  |
| 3    | 6  | 0.03  | -0.03 | -0.03 | 0.03  | -0.01 | 0.04  | 0.00  | 0.01  | -0.01 |
| 4    | 6  | 0.02  | -0.07 | 0.01  | 0.17  | 0.02  | -0.04 | 0.02  | 0.03  | -0.01 |
| 5    | 6  | 0.01  | -0.04 | 0.03  | 0.05  | -0.01 | 0.00  | 0.02  | -0.07 | 0.07  |
| 6    | 6  | 0.01  | 0.02  | 0.01  | -0.02 | -0.04 | -0.03 | 0.09  | 0.01  | 0.03  |
| 7    | 8  | 0.01  | 0.00  | 0.00  | 0.04  | 0.06  | -0.01 | -0.01 | -0.01 | 0.01  |
| 8    | 6  | 0.03  | 0.05  | -0.04 | -0.08 | -0.08 | 0.08  | 0.02  | 0.00  | -0.02 |
| 9    | 6  | -0.01 | -0.01 | 0.06  | 0.14  | -0.02 | -0.08 | -0.02 | 0.01  | 0.01  |
| 10   | 1  | -0.09 | 0.15  | 0.13  | 0.12  | -0.07 | -0.07 | -0.03 | 0.02  | 0.01  |
| 11   | 8  | -0.01 | -0.10 | -0.02 | -0.05 | 0.13  | 0.03  | 0.00  | -0.02 | 0.00  |
| 12   | 6  | -0.07 | -0.03 | -0.09 | 0.23  | -0.04 | -0.15 | -0.01 | 0.06  | 0.02  |
| 13   | 1  | -0.12 | -0.05 | -0.07 | 0.36  | -0.02 | -0.16 | -0.02 | 0.07  | 0.00  |
| 14   | 6  | -0.02 | 0.00  | 0.01  | -0.05 | 0.00  | 0.04  | -0.16 | 0.02  | 0.15  |
| 15   | 8  | 0.01  | 0.00  | 0.01  | 0.01  | 0.00  | 0.00  | 0.02  | 0.00  | -0.01 |
| 16   | 6  | -0.04 | 0.01  | -0.03 | -0.01 | 0.00  | 0.01  | 0.01  | 0.00  | 0.00  |
| 17   | 1  | 0.04  | -0.04 | 0.08  | -0.13 | 0.09  | -0.12 | 0.03  | -0.01 | 0.03  |
| 18   | 1  | -0.11 | -0.01 | -0.01 | 0.04  | 0.05  | -0.03 | -0.02 | 0.00  | 0.00  |
| 19   | 1  | -0.16 | 0.00  | -0.03 | 0.17  | 0.02  | 0.05  | -0.01 | 0.00  | 0.01  |
| 20   | 6  | 0.09  | -0.02 | 0.08  | 0.01  | -0.04 | -0.01 | -0.01 | -0.01 | 0.00  |
| 21   | 1  | 0.07  | 0.05  | 0.11  | 0.00  | -0.05 | -0.01 | -0.01 | -0.01 | 0.00  |
| 22   | 6  | -0.03 | 0.03  | -0.05 | -0.02 | 0.01  | -0.02 | 0.00  | 0.00  | 0.01  |
| 23   | 1  | 0.00  | 0.06  | 0.00  | -0.02 | 0.01  | -0.02 | 0.00  | 0.02  | -0.03 |
| 24   | 1  | -0.08 | 0.10  | -0.10 | -0.02 | 0.03  | -0.04 | 0.01  | 0.01  | -0.01 |
| 25   | 1  | 0.01  | 0.03  | 0.00  | -0.02 | 0.02  | 0.00  | 0.04  | -0.02 | 0.03  |
| 26   | 6  | 0.03  | 0.03  | 0.00  | -0.05 | -0.07 | 0.00  | 0.01  | 0.03  | 0.01  |
| 27   | 1  | -0.02 | 0.00  | 0.04  | -0.01 | -0.13 | 0.00  | 0.03  | 0.09  | -0.02 |
| 28   | 1  | 0.08  | 0.05  | 0.04  | -0.03 | -0.06 | 0.01  | -0.03 | 0.02  | -0.02 |
| 29   | 6  | 0.03  | 0.01  | -0.04 | -0.08 | 0.00  | 0.13  | 0.00  | 0.00  | 0.00  |
| 30   | 1  | 0.07  | 0.06  | -0.07 | -0.10 | -0.05 | 0.14  | 0.01  | 0.00  | 0.00  |
| 31   | 1  | 0.03  | 0.02  | 0.04  | -0.06 | -0.07 | 0.05  | 0.00  | 0.01  | 0.01  |
| 32   | 6  | -0.01 | 0.02  | 0.02  | -0.07 | -0.03 | 0.02  | 0.03  | 0.01  | -0.04 |
| 33   | 1  | 0.03  | -0.07 | 0.04  | -0.04 | 0.02  | 0.06  | 0.03  | -0.01 | -0.04 |
| 34   | 6  | -0.01 | 0.03  | 0.06  | -0.01 | -0.06 | -0.01 | 0.01  | 0.02  | 0.00  |
| 35   | 1  | 0.08  | -0.02 | 0.11  | 0.01  | -0.11 | 0.04  | 0.00  | 0.00  | 0.02  |
| 36   | 6  | 0.02  | -0.02 | 0.11  | -0.01 | -0.01 | -0.04 | -0.02 | 0.01  | -0.05 |
| 37   | 1  | -0.03 | 0.01  | 0.03  | -0.14 | -0.04 | -0.07 | -0.04 | -0.01 | -0.04 |
| 38   | 1  | -0.01 | 0.01  | 0.12  | -0.14 | -0.02 | -0.19 | -0.06 | 0.00  | -0.10 |

|    |   |       |       |       |       |       |       |       |       |       |
|----|---|-------|-------|-------|-------|-------|-------|-------|-------|-------|
| 39 | 1 | 0.02  | 0.00  | 0.18  | -0.04 | -0.04 | 0.20  | -0.03 | -0.02 | 0.01  |
| 40 | 6 | 0.02  | -0.03 | -0.02 | 0.00  | 0.06  | 0.02  | -0.01 | 0.00  | 0.01  |
| 41 | 1 | -0.01 | -0.09 | 0.04  | 0.04  | 0.12  | -0.03 | -0.03 | 0.02  | -0.01 |
| 42 | 6 | 0.00  | 0.00  | -0.01 | 0.02  | 0.01  | -0.03 | 0.00  | -0.02 | 0.04  |
| 43 | 1 | -0.02 | -0.04 | 0.03  | 0.04  | 0.07  | -0.09 | -0.12 | -0.09 | 0.19  |
| 44 | 1 | 0.00  | 0.00  | -0.06 | 0.00  | 0.02  | 0.07  | -0.12 | -0.03 | 0.01  |
| 45 | 1 | -0.01 | -0.02 | -0.01 | 0.03  | 0.07  | -0.03 | -0.04 | 0.04  | -0.15 |
| 46 | 6 | -0.03 | 0.00  | -0.04 | -0.04 | -0.05 | 0.01  | -0.04 | -0.04 | -0.11 |
| 47 | 1 | -0.05 | 0.00  | -0.03 | -0.06 | -0.02 | 0.00  | -0.04 | -0.03 | -0.12 |
| 48 | 6 | -0.06 | 0.04  | -0.02 | -0.02 | 0.02  | 0.00  | -0.06 | 0.03  | -0.07 |
| 49 | 1 | -0.06 | 0.03  | -0.01 | -0.02 | -0.04 | 0.02  | -0.05 | -0.19 | 0.03  |
| 50 | 1 | -0.06 | 0.06  | 0.00  | -0.01 | 0.08  | 0.07  | -0.18 | 0.18  | 0.09  |
| 51 | 6 | -0.03 | 0.04  | -0.01 | -0.01 | 0.04  | -0.02 | 0.05  | 0.07  | -0.06 |
| 52 | 1 | -0.02 | 0.06  | 0.02  | 0.02  | 0.06  | 0.01  | 0.18  | 0.12  | 0.04  |
| 53 | 6 | 0.01  | -0.01 | 0.00  | 0.03  | -0.01 | -0.02 | 0.07  | -0.02 | -0.07 |
| 54 | 1 | 0.02  | -0.01 | -0.01 | 0.07  | -0.02 | -0.07 | 0.22  | -0.04 | -0.22 |
| 55 | 6 | 0.00  | 0.00  | 0.01  | -0.01 | 0.00  | 0.02  | -0.03 | 0.01  | 0.03  |
| 56 | 1 | -0.01 | 0.01  | 0.01  | -0.04 | 0.02  | 0.05  | -0.14 | 0.03  | 0.14  |
| 57 | 6 | 0.01  | 0.00  | 0.00  | 0.01  | 0.00  | 0.00  | -0.01 | 0.00  | 0.00  |
| 58 | 1 | 0.04  | 0.00  | -0.01 | 0.12  | -0.02 | -0.10 | 0.43  | -0.06 | -0.43 |
| 59 | 8 | -0.01 | 0.03  | 0.01  | -0.01 | -0.03 | 0.01  | -0.01 | -0.02 | -0.01 |
| 60 | 8 | 0.03  | 0.08  | -0.08 | -0.08 | -0.01 | -0.04 | 0.01  | -0.01 | 0.01  |
| 61 | 8 | 0.06  | -0.02 | 0.00  | -0.07 | 0.03  | 0.07  | 0.03  | -0.06 | 0.04  |
| 62 | 6 | 0.02  | 0.10  | -0.02 | -0.09 | 0.03  | -0.02 | 0.00  | -0.02 | 0.02  |
| 63 | 6 | 0.06  | 0.11  | 0.11  | 0.05  | 0.03  | 0.05  | -0.02 | -0.02 | -0.02 |
| 64 | 6 | 0.10  | 0.00  | -0.09 | 0.06  | 0.01  | -0.05 | -0.02 | 0.00  | 0.02  |
| 65 | 8 | -0.02 | -0.14 | -0.03 | 0.02  | -0.04 | -0.01 | 0.00  | 0.01  | 0.03  |
| 66 | 1 | -0.07 | -0.04 | -0.20 | -0.05 | 0.03  | -0.13 | 0.03  | 0.00  | 0.05  |
| 67 | 6 | -0.01 | -0.05 | -0.03 | 0.01  | 0.00  | 0.00  | 0.00  | 0.00  | 0.00  |
| 68 | 1 | -0.17 | -0.32 | -0.08 | -0.08 | -0.12 | -0.03 | 0.03  | 0.06  | 0.02  |
| 69 | 1 | -0.07 | 0.08  | 0.14  | -0.03 | 0.08  | 0.08  | 0.01  | -0.03 | -0.03 |
| 70 | 1 | -0.09 | 0.05  | 0.09  | -0.04 | 0.05  | 0.05  | 0.02  | -0.01 | -0.02 |
| 71 | 6 | -0.11 | 0.03  | 0.14  | -0.04 | 0.01  | 0.05  | 0.02  | -0.01 | -0.03 |
| 72 | 1 | -0.01 | -0.07 | -0.09 | 0.02  | -0.04 | -0.08 | 0.01  | 0.01  | 0.01  |
| 73 | 1 | -0.26 | -0.05 | 0.20  | -0.15 | -0.02 | 0.10  | 0.06  | 0.00  | -0.05 |
| 74 | 1 | -0.25 | -0.02 | 0.19  | -0.11 | -0.01 | 0.05  | 0.05  | 0.00  | -0.03 |

64

65

66

A

A

A

|                |          |          |          |
|----------------|----------|----------|----------|
| Frequencies -- | 696.5234 | 703.0093 | 723.4458 |
| Red. masses -- | 4.8042   | 3.5384   | 3.0339   |
| Frc consts --  | 1.3732   | 1.0303   | 0.9356   |
| IR Inten --    | 40.8623  | 5.4725   | 18.8683  |
| Raman Activ -- | 2.2292   | 2.4609   | 4.4984   |
| Depolar (P) -- | 0.7456   | 0.2016   | 0.4815   |
| Depolar (U) -- | 0.8542   | 0.3356   | 0.6500   |

| Atom | AN | X     | Y     | Z     | X     | Y     | Z     | X     | Y     | Z     |
|------|----|-------|-------|-------|-------|-------|-------|-------|-------|-------|
| 1    | 6  | 0.15  | 0.01  | -0.11 | 0.12  | 0.06  | -0.05 | 0.02  | -0.04 | -0.03 |
| 2    | 6  | 0.12  | 0.01  | 0.02  | 0.09  | -0.01 | -0.03 | -0.13 | 0.10  | -0.11 |
| 3    | 6  | 0.09  | -0.06 | -0.01 | 0.02  | 0.03  | 0.06  | 0.04  | -0.02 | 0.01  |
| 4    | 6  | 0.06  | 0.17  | 0.00  | -0.04 | -0.06 | 0.00  | 0.07  | 0.01  | -0.02 |
| 5    | 6  | 0.01  | -0.02 | -0.01 | 0.00  | 0.07  | -0.03 | 0.03  | 0.00  | 0.00  |
| 6    | 6  | -0.03 | 0.01  | -0.01 | 0.01  | -0.07 | -0.02 | -0.01 | -0.02 | -0.01 |

|    |   |       |       |       |       |       |       |       |       |       |
|----|---|-------|-------|-------|-------|-------|-------|-------|-------|-------|
| 7  | 8 | 0.03  | 0.06  | -0.04 | 0.01  | 0.03  | -0.02 | 0.05  | 0.03  | 0.02  |
| 8  | 6 | 0.03  | 0.07  | -0.02 | -0.01 | 0.05  | 0.03  | 0.01  | 0.03  | 0.00  |
| 9  | 6 | -0.01 | -0.04 | 0.07  | -0.02 | -0.04 | 0.03  | -0.07 | 0.01  | -0.05 |
| 10 | 1 | -0.02 | -0.07 | 0.07  | -0.01 | -0.04 | 0.02  | -0.17 | 0.07  | 0.01  |
| 11 | 8 | -0.05 | -0.17 | -0.01 | 0.01  | -0.06 | -0.01 | 0.01  | -0.04 | -0.01 |
| 12 | 6 | 0.04  | 0.21  | 0.04  | -0.05 | -0.11 | 0.00  | -0.02 | 0.03  | -0.11 |
| 13 | 1 | 0.10  | 0.33  | -0.08 | -0.09 | -0.16 | 0.05  | 0.01  | 0.01  | -0.08 |
| 14 | 6 | 0.02  | -0.01 | -0.04 | -0.06 | 0.01  | 0.08  | 0.01  | 0.00  | -0.01 |
| 15 | 8 | 0.01  | 0.00  | 0.01  | 0.00  | 0.00  | -0.02 | 0.00  | 0.00  | 0.00  |
| 16 | 6 | 0.02  | 0.00  | 0.00  | -0.01 | 0.01  | -0.01 | 0.05  | -0.01 | 0.04  |
| 17 | 1 | 0.06  | -0.05 | 0.05  | -0.02 | -0.01 | -0.03 | 0.10  | -0.01 | 0.11  |
| 18 | 1 | 0.04  | -0.07 | 0.06  | 0.05  | -0.05 | 0.03  | -0.03 | 0.01  | 0.03  |
| 19 | 1 | -0.11 | -0.03 | -0.07 | -0.05 | -0.02 | -0.08 | 0.01  | 0.00  | 0.07  |
| 20 | 6 | 0.01  | 0.07  | -0.02 | 0.03  | 0.07  | -0.01 | 0.04  | -0.03 | 0.04  |
| 21 | 1 | 0.01  | 0.12  | 0.00  | 0.03  | 0.09  | -0.01 | 0.05  | -0.07 | 0.01  |
| 22 | 6 | -0.02 | 0.03  | -0.07 | 0.01  | 0.01  | -0.01 | 0.02  | -0.02 | 0.03  |
| 23 | 1 | 0.01  | -0.13 | 0.19  | 0.01  | -0.12 | 0.13  | 0.07  | 0.03  | 0.14  |
| 24 | 1 | -0.15 | 0.03  | -0.03 | -0.04 | -0.06 | 0.07  | -0.09 | 0.12  | -0.06 |
| 25 | 1 | -0.24 | 0.13  | -0.17 | -0.17 | 0.08  | -0.14 | 0.05  | 0.01  | 0.11  |
| 26 | 6 | 0.00  | 0.03  | 0.00  | -0.09 | -0.08 | 0.01  | -0.03 | -0.03 | 0.00  |
| 27 | 1 | -0.01 | -0.02 | 0.03  | 0.04  | -0.04 | -0.08 | -0.01 | -0.05 | 0.00  |
| 28 | 1 | 0.02  | 0.07  | 0.03  | -0.16 | -0.16 | -0.06 | -0.02 | -0.03 | 0.00  |
| 29 | 6 | 0.01  | 0.04  | -0.06 | 0.02  | 0.02  | -0.06 | 0.00  | 0.01  | 0.00  |
| 30 | 1 | 0.05  | 0.09  | -0.08 | 0.03  | 0.03  | -0.06 | 0.00  | 0.00  | -0.01 |
| 31 | 1 | -0.02 | 0.13  | 0.07  | 0.02  | 0.04  | -0.01 | -0.01 | 0.03  | -0.01 |
| 32 | 6 | -0.07 | -0.06 | 0.12  | -0.08 | -0.04 | 0.13  | -0.15 | 0.05  | -0.01 |
| 33 | 1 | -0.16 | -0.10 | 0.05  | -0.12 | 0.03  | 0.11  | 0.08  | -0.15 | 0.14  |
| 34 | 6 | -0.08 | -0.04 | 0.06  | -0.04 | -0.06 | -0.02 | 0.00  | -0.05 | 0.01  |
| 35 | 1 | -0.16 | 0.03  | 0.00  | -0.05 | 0.04  | -0.11 | 0.44  | -0.32 | 0.27  |
| 36 | 6 | 0.00  | 0.02  | -0.05 | -0.01 | 0.00  | -0.03 | 0.01  | -0.01 | 0.02  |
| 37 | 1 | 0.01  | -0.09 | 0.13  | 0.02  | 0.01  | -0.04 | -0.05 | -0.03 | 0.03  |
| 38 | 1 | -0.08 | -0.05 | -0.25 | 0.05  | 0.00  | 0.04  | -0.07 | -0.02 | -0.08 |
| 39 | 1 | -0.02 | -0.09 | 0.00  | 0.00  | 0.03  | -0.10 | 0.00  | -0.04 | 0.15  |
| 40 | 6 | 0.01  | -0.03 | 0.04  | -0.03 | 0.12  | 0.04  | 0.00  | 0.02  | 0.01  |
| 41 | 1 | -0.05 | -0.06 | 0.04  | 0.04  | 0.23  | -0.05 | -0.01 | 0.02  | 0.00  |
| 42 | 6 | 0.00  | 0.01  | -0.01 | -0.01 | -0.02 | 0.03  | 0.00  | 0.00  | -0.02 |
| 43 | 1 | 0.03  | 0.00  | -0.04 | -0.02 | 0.07  | -0.01 | 0.02  | 0.03  | -0.06 |
| 44 | 1 | 0.03  | 0.01  | -0.05 | -0.07 | -0.02 | 0.22  | 0.01  | 0.01  | 0.01  |
| 45 | 1 | 0.01  | -0.03 | 0.05  | 0.00  | 0.10  | -0.04 | 0.01  | 0.02  | -0.01 |
| 46 | 6 | 0.01  | -0.06 | -0.05 | -0.01 | 0.06  | 0.12  | -0.01 | 0.00  | 0.02  |
| 47 | 1 | 0.07  | -0.03 | -0.13 | -0.10 | 0.05  | 0.23  | -0.04 | 0.00  | 0.05  |
| 48 | 6 | 0.00  | 0.00  | 0.00  | 0.05  | -0.04 | 0.00  | 0.00  | 0.00  | 0.01  |
| 49 | 1 | 0.06  | 0.04  | 0.06  | -0.08 | -0.17 | -0.09 | -0.01 | 0.02  | 0.00  |
| 50 | 1 | 0.00  | 0.01  | 0.01  | 0.04  | 0.01  | 0.06  | 0.01  | -0.01 | 0.00  |
| 51 | 6 | -0.05 | 0.02  | 0.01  | 0.13  | -0.03 | -0.05 | -0.01 | 0.00  | 0.01  |
| 52 | 1 | -0.08 | 0.02  | 0.00  | 0.18  | -0.02 | -0.02 | -0.02 | 0.00  | 0.01  |
| 53 | 6 | -0.01 | -0.01 | 0.02  | 0.03  | 0.01  | -0.04 | 0.00  | 0.00  | 0.00  |
| 54 | 1 | -0.03 | 0.00  | 0.05  | 0.09  | -0.01 | -0.12 | -0.01 | 0.00  | 0.00  |
| 55 | 6 | 0.01  | 0.00  | 0.00  | -0.02 | 0.00  | 0.00  | 0.00  | 0.00  | 0.00  |
| 56 | 1 | 0.04  | 0.01  | -0.03 | -0.09 | 0.00  | 0.08  | 0.02  | 0.00  | -0.02 |
| 57 | 6 | 0.01  | 0.00  | 0.00  | -0.03 | 0.00  | 0.02  | 0.01  | 0.00  | -0.01 |
| 58 | 1 | -0.09 | 0.02  | 0.12  | 0.27  | -0.05 | -0.30 | -0.05 | 0.01  | 0.05  |



|    |   |       |       |       |       |       |       |       |       |       |
|----|---|-------|-------|-------|-------|-------|-------|-------|-------|-------|
| 59 | 8 | -0.10 | -0.10 | 0.02  | -0.03 | -0.01 | 0.01  | -0.01 | -0.01 | 0.00  |
| 60 | 8 | -0.01 | -0.06 | -0.03 | 0.00  | 0.03  | 0.01  | 0.03  | 0.06  | -0.01 |
| 61 | 8 | -0.04 | -0.01 | 0.06  | 0.00  | 0.05  | -0.07 | -0.02 | 0.02  | 0.00  |
| 62 | 6 | -0.13 | -0.02 | 0.02  | 0.06  | 0.01  | -0.02 | 0.14  | -0.01 | 0.08  |
| 63 | 6 | 0.01  | -0.01 | -0.01 | 0.00  | 0.01  | 0.01  | -0.05 | -0.01 | -0.04 |
| 64 | 6 | 0.01  | 0.01  | 0.00  | 0.00  | 0.00  | 0.00  | -0.07 | 0.00  | 0.04  |
| 65 | 8 | 0.03  | 0.00  | 0.05  | -0.01 | 0.00  | -0.03 | -0.05 | -0.01 | 0.07  |
| 66 | 1 | -0.02 | 0.04  | -0.03 | 0.00  | -0.02 | 0.00  | 0.12  | -0.08 | 0.20  |
| 67 | 6 | 0.01  | 0.03  | 0.01  | 0.00  | -0.01 | -0.01 | -0.02 | -0.03 | -0.01 |
| 68 | 1 | 0.00  | 0.04  | 0.01  | -0.01 | -0.03 | -0.01 | 0.09  | 0.10  | 0.04  |
| 69 | 1 | 0.01  | 0.05  | 0.02  | -0.01 | -0.01 | 0.00  | 0.02  | -0.17 | -0.11 |
| 70 | 1 | 0.00  | 0.02  | 0.00  | -0.01 | 0.00  | 0.01  | 0.05  | -0.05 | -0.04 |
| 71 | 6 | 0.03  | -0.02 | -0.04 | -0.02 | 0.01  | 0.03  | 0.04  | -0.01 | -0.07 |
| 72 | 1 | 0.03  | -0.02 | -0.06 | -0.02 | 0.01  | 0.03  | 0.00  | 0.02  | 0.08  |
| 73 | 1 | 0.00  | -0.02 | -0.02 | -0.02 | 0.01  | 0.02  | 0.18  | 0.00  | -0.13 |
| 74 | 1 | 0.02  | -0.02 | -0.03 | -0.02 | 0.01  | 0.03  | 0.11  | 0.01  | -0.04 |

|                | 67       | 68       | 69       |
|----------------|----------|----------|----------|
|                | A        | A        | A        |
| Frequencies -- | 732.3236 | 739.1239 | 750.9877 |
| Red. masses -- | 3.3080   | 1.3881   | 4.1446   |
| Frc consts --  | 1.0452   | 0.4468   | 1.3772   |
| IR Inten --    | 0.8362   | 16.1963  | 5.0319   |
| Raman Activ -- | 10.8568  | 0.0788   | 4.4818   |
| Depolar (P) -- | 0.1545   | 0.7232   | 0.2789   |
| Depolar (U) -- | 0.2677   | 0.8394   | 0.4361   |

| Atom | AN | X     | Y     | Z     | X     | Y     | Z     | X     | Y     | Z     |
|------|----|-------|-------|-------|-------|-------|-------|-------|-------|-------|
| 1    | 6  | -0.01 | -0.03 | -0.01 | 0.00  | 0.01  | 0.00  | 0.00  | 0.05  | 0.04  |
| 2    | 6  | 0.12  | -0.07 | 0.12  | 0.00  | 0.00  | -0.01 | 0.08  | 0.00  | -0.05 |
| 3    | 6  | 0.02  | -0.02 | 0.01  | -0.01 | 0.01  | 0.00  | -0.12 | 0.10  | -0.01 |
| 4    | 6  | 0.09  | 0.00  | -0.02 | -0.01 | 0.00  | 0.00  | -0.16 | 0.11  | 0.05  |
| 5    | 6  | 0.04  | 0.00  | 0.00  | 0.00  | -0.01 | 0.01  | -0.08 | -0.02 | 0.04  |
| 6    | 6  | -0.01 | -0.02 | -0.01 | 0.02  | -0.01 | 0.00  | 0.05  | 0.04  | 0.03  |
| 7    | 8  | -0.04 | 0.00  | -0.02 | 0.00  | 0.00  | 0.00  | 0.01  | 0.04  | -0.01 |
| 8    | 6  | 0.01  | -0.04 | -0.01 | 0.00  | 0.00  | 0.00  | -0.04 | 0.01  | 0.07  |
| 9    | 6  | -0.02 | 0.04  | 0.00  | 0.00  | -0.01 | 0.00  | 0.06  | -0.09 | -0.06 |
| 10   | 1  | -0.13 | 0.17  | 0.08  | 0.01  | -0.01 | 0.00  | 0.04  | -0.04 | -0.04 |
| 11   | 8  | -0.01 | 0.02  | 0.02  | 0.00  | 0.00  | 0.00  | 0.02  | 0.02  | 0.00  |
| 12   | 6  | -0.02 | 0.02  | -0.11 | 0.00  | -0.01 | 0.00  | 0.05  | -0.08 | -0.12 |
| 13   | 1  | -0.04 | -0.01 | -0.08 | 0.00  | -0.01 | 0.01  | 0.29  | -0.03 | -0.15 |
| 14   | 6  | 0.01  | 0.00  | 0.00  | -0.02 | 0.01  | 0.03  | 0.01  | 0.00  | 0.00  |
| 15   | 8  | 0.00  | 0.00  | 0.00  | 0.01  | 0.00  | -0.02 | -0.01 | 0.00  | 0.00  |
| 16   | 6  | -0.11 | 0.02  | -0.08 | 0.00  | 0.00  | 0.00  | -0.05 | 0.01  | -0.02 |
| 17   | 1  | -0.10 | 0.01  | -0.07 | 0.00  | 0.00  | 0.00  | -0.10 | 0.00  | -0.09 |
| 18   | 1  | -0.11 | 0.01  | -0.08 | 0.01  | 0.00  | 0.01  | 0.05  | -0.04 | 0.02  |
| 19   | 1  | -0.11 | 0.02  | -0.08 | 0.00  | 0.00  | 0.00  | -0.05 | -0.01 | -0.08 |
| 20   | 6  | 0.06  | -0.04 | 0.05  | 0.00  | 0.01  | 0.00  | 0.09  | -0.03 | 0.04  |
| 21   | 1  | 0.06  | -0.05 | 0.04  | 0.00  | 0.01  | 0.00  | 0.09  | -0.05 | 0.03  |
| 22   | 6  | -0.07 | 0.05  | -0.11 | 0.01  | 0.00  | 0.01  | 0.01  | 0.01  | 0.00  |
| 23   | 1  | -0.08 | 0.05  | -0.14 | 0.00  | -0.01 | 0.00  | -0.02 | 0.02  | -0.09 |
| 24   | 1  | -0.04 | 0.06  | -0.14 | 0.01  | -0.02 | 0.02  | 0.09  | -0.06 | 0.05  |
| 25   | 1  | -0.04 | 0.03  | -0.08 | 0.00  | 0.00  | -0.01 | 0.03  | -0.02 | -0.02 |
| 26   | 6  | -0.02 | -0.03 | 0.00  | 0.00  | -0.01 | 0.01  | 0.07  | 0.05  | 0.01  |

|    |   |       |       |       |       |       |       |       |       |       |
|----|---|-------|-------|-------|-------|-------|-------|-------|-------|-------|
| 27 | 1 | 0.01  | -0.06 | -0.01 | 0.02  | 0.00  | -0.01 | 0.02  | 0.10  | 0.01  |
| 28 | 1 | -0.01 | -0.05 | 0.00  | -0.02 | -0.01 | -0.01 | 0.02  | 0.08  | 0.00  |
| 29 | 6 | -0.01 | -0.02 | 0.03  | 0.00  | 0.00  | -0.01 | 0.00  | 0.08  | -0.02 |
| 30 | 1 | 0.01  | 0.01  | 0.03  | 0.00  | 0.00  | -0.01 | 0.01  | 0.11  | -0.02 |
| 31 | 1 | 0.01  | -0.05 | 0.06  | 0.00  | 0.00  | 0.00  | 0.02  | 0.03  | -0.01 |
| 32 | 6 | 0.14  | -0.06 | 0.01  | -0.01 | 0.00  | 0.01  | -0.07 | -0.04 | 0.15  |
| 33 | 1 | -0.08 | 0.08  | -0.15 | -0.01 | 0.01  | 0.01  | -0.16 | 0.17  | 0.12  |
| 34 | 6 | -0.02 | 0.07  | 0.05  | 0.00  | -0.01 | -0.01 | 0.01  | -0.10 | -0.09 |
| 35 | 1 | -0.45 | 0.29  | -0.16 | 0.01  | 0.00  | -0.01 | -0.06 | 0.07  | -0.24 |
| 36 | 6 | 0.02  | -0.01 | 0.02  | 0.00  | 0.00  | -0.01 | -0.01 | 0.01  | 0.05  |
| 37 | 1 | -0.08 | -0.03 | 0.00  | 0.00  | 0.00  | -0.01 | 0.14  | -0.06 | 0.26  |
| 38 | 1 | -0.08 | -0.01 | -0.08 | 0.00  | 0.00  | -0.01 | 0.09  | -0.07 | 0.01  |
| 39 | 1 | 0.00  | -0.03 | 0.19  | 0.00  | 0.00  | -0.01 | 0.01  | -0.05 | -0.20 |
| 40 | 6 | 0.00  | 0.05  | 0.01  | 0.00  | 0.01  | 0.01  | 0.00  | -0.10 | 0.02  |
| 41 | 1 | 0.02  | 0.08  | -0.02 | 0.00  | 0.03  | -0.01 | 0.02  | -0.08 | 0.00  |
| 42 | 6 | 0.00  | 0.00  | -0.02 | 0.01  | 0.00  | 0.00  | 0.01  | 0.01  | 0.00  |
| 43 | 1 | 0.02  | 0.04  | -0.06 | -0.02 | 0.00  | 0.02  | -0.05 | -0.09 | 0.12  |
| 44 | 1 | 0.01  | 0.01  | 0.02  | -0.02 | 0.00  | 0.01  | -0.01 | 0.00  | -0.13 |
| 45 | 1 | 0.01  | 0.03  | -0.01 | 0.00  | 0.02  | -0.05 | -0.02 | -0.03 | -0.06 |
| 46 | 6 | -0.01 | 0.00  | 0.02  | -0.01 | 0.00  | -0.01 | 0.03  | 0.00  | -0.11 |
| 47 | 1 | -0.06 | 0.00  | 0.06  | -0.01 | 0.00  | 0.00  | 0.18  | -0.02 | -0.21 |
| 48 | 6 | -0.01 | 0.00  | 0.01  | -0.01 | 0.00  | -0.01 | -0.01 | 0.02  | -0.01 |
| 49 | 1 | -0.01 | 0.02  | 0.00  | -0.01 | -0.02 | 0.00  | 0.06  | 0.05  | 0.06  |
| 50 | 1 | 0.01  | 0.00  | 0.00  | -0.03 | 0.01  | 0.00  | -0.06 | -0.01 | -0.04 |
| 51 | 6 | -0.01 | 0.00  | 0.01  | 0.01  | 0.00  | 0.01  | -0.02 | 0.00  | 0.02  |
| 52 | 1 | -0.02 | 0.00  | 0.01  | 0.04  | 0.01  | 0.02  | -0.01 | -0.01 | 0.02  |
| 53 | 6 | 0.00  | 0.00  | 0.00  | -0.02 | 0.01  | 0.02  | 0.00  | 0.00  | 0.00  |
| 54 | 1 | 0.02  | 0.00  | -0.02 | 0.37  | -0.06 | -0.38 | -0.05 | 0.01  | 0.05  |
| 55 | 6 | -0.01 | 0.00  | 0.01  | -0.10 | 0.02  | 0.09  | 0.01  | 0.00  | -0.01 |
| 56 | 1 | 0.04  | -0.01 | -0.04 | 0.48  | -0.08 | -0.47 | -0.05 | 0.01  | 0.05  |
| 57 | 6 | 0.01  | 0.00  | -0.01 | 0.07  | -0.01 | -0.07 | 0.00  | 0.00  | 0.00  |
| 58 | 1 | -0.07 | 0.01  | 0.06  | -0.33 | 0.05  | 0.31  | -0.02 | 0.00  | 0.00  |
| 59 | 8 | -0.01 | -0.01 | 0.02  | 0.00  | 0.00  | -0.01 | -0.01 | -0.02 | -0.02 |
| 60 | 8 | 0.01  | 0.06  | -0.02 | 0.00  | 0.00  | 0.00  | -0.04 | 0.03  | -0.01 |
| 61 | 8 | -0.02 | 0.02  | 0.00  | 0.01  | -0.01 | 0.00  | 0.03  | -0.09 | 0.02  |
| 62 | 6 | 0.14  | 0.00  | 0.07  | 0.00  | 0.00  | 0.00  | 0.14  | -0.02 | 0.03  |
| 63 | 6 | -0.04 | 0.00  | -0.03 | 0.00  | 0.00  | 0.00  | -0.03 | 0.02  | -0.02 |
| 64 | 6 | -0.06 | 0.00  | 0.03  | 0.00  | 0.00  | 0.00  | -0.02 | 0.00  | 0.00  |
| 65 | 8 | -0.05 | -0.02 | 0.06  | 0.00  | 0.00  | -0.01 | -0.04 | 0.00  | 0.01  |
| 66 | 1 | 0.12  | -0.09 | 0.19  | 0.00  | 0.00  | -0.01 | 0.13  | -0.09 | 0.13  |
| 67 | 6 | -0.02 | -0.03 | -0.01 | 0.00  | 0.00  | 0.00  | -0.01 | -0.02 | -0.01 |
| 68 | 1 | 0.07  | 0.07  | 0.04  | 0.00  | -0.01 | 0.00  | 0.03  | -0.02 | 0.02  |
| 69 | 1 | 0.01  | -0.16 | -0.10 | 0.00  | 0.01  | 0.01  | 0.00  | -0.10 | -0.04 |
| 70 | 1 | 0.04  | -0.04 | -0.02 | 0.00  | 0.00  | 0.00  | 0.02  | 0.02  | 0.02  |
| 71 | 6 | 0.03  | -0.01 | -0.05 | 0.00  | 0.00  | 0.01  | -0.01 | 0.01  | 0.01  |
| 72 | 1 | 0.00  | 0.02  | 0.07  | 0.00  | 0.00  | 0.00  | -0.01 | 0.00  | 0.07  |
| 73 | 1 | 0.16  | 0.00  | -0.11 | -0.01 | 0.00  | 0.01  | 0.08  | 0.00  | -0.04 |
| 74 | 1 | 0.08  | 0.01  | -0.02 | -0.01 | 0.00  | 0.01  | -0.01 | 0.01  | 0.05  |

|                |          |          |          |
|----------------|----------|----------|----------|
|                | 70       | 71       | 72       |
|                | A        | A        | A        |
| Frequencies -- | 765.0018 | 769.6190 | 783.7759 |
| Red. masses -- | 3.2856   | 4.1455   | 3.5753   |

|             |    |         |  |         |  |         |
|-------------|----|---------|--|---------|--|---------|
| Frc consts  | -- | 1.1329  |  | 1.4467  |  | 1.2940  |
| IR Inten    | -- | 11.7201 |  | 62.4072 |  | 11.5031 |
| Raman Activ | -- | 14.1992 |  | 8.3682  |  | 4.2390  |
| Depolar (P) | -- | 0.1084  |  | 0.1555  |  | 0.3379  |
| Depolar (U) | -- | 0.1955  |  | 0.2692  |  | 0.5052  |

  

| Atom | AN | X     | Y     | Z     | X     | Y     | Z     | X     | Y     | Z     |
|------|----|-------|-------|-------|-------|-------|-------|-------|-------|-------|
| 1    | 6  | 0.00  | 0.06  | 0.02  | 0.01  | -0.01 | -0.02 | -0.14 | -0.12 | 0.04  |
| 2    | 6  | -0.01 | -0.02 | 0.00  | -0.02 | 0.00  | 0.02  | 0.07  | 0.04  | 0.00  |
| 3    | 6  | 0.00  | 0.05  | 0.02  | 0.04  | -0.03 | -0.02 | -0.04 | -0.08 | 0.05  |
| 4    | 6  | 0.07  | -0.02 | -0.01 | 0.03  | 0.06  | 0.01  | 0.05  | -0.02 | -0.01 |
| 5    | 6  | 0.05  | -0.07 | 0.11  | 0.01  | 0.04  | -0.07 | 0.04  | 0.00  | 0.01  |
| 6    | 6  | 0.12  | -0.04 | 0.04  | -0.05 | 0.01  | -0.02 | -0.01 | 0.00  | 0.00  |
| 7    | 8  | -0.01 | -0.03 | 0.00  | -0.01 | -0.02 | 0.00  | 0.03  | 0.08  | 0.01  |
| 8    | 6  | 0.00  | 0.02  | -0.01 | 0.01  | 0.00  | -0.02 | -0.04 | 0.05  | 0.00  |
| 9    | 6  | 0.00  | 0.00  | 0.03  | 0.01  | 0.01  | 0.04  | -0.04 | -0.02 | 0.00  |
| 10   | 1  | 0.01  | -0.04 | 0.02  | 0.05  | -0.04 | 0.01  | 0.00  | 0.02  | -0.01 |
| 11   | 8  | -0.01 | -0.04 | 0.01  | -0.01 | 0.01  | 0.01  | 0.04  | -0.04 | -0.03 |
| 12   | 6  | -0.01 | -0.01 | 0.02  | 0.02  | 0.05  | 0.06  | 0.00  | 0.03  | 0.03  |
| 13   | 1  | -0.07 | -0.02 | 0.03  | 0.01  | 0.11  | 0.00  | -0.04 | 0.03  | 0.03  |
| 14   | 6  | 0.07  | 0.00  | 0.02  | -0.03 | 0.00  | -0.02 | 0.00  | 0.00  | 0.00  |
| 15   | 8  | -0.06 | 0.00  | -0.02 | 0.02  | 0.00  | 0.01  | 0.00  | 0.00  | 0.00  |
| 16   | 6  | 0.02  | 0.00  | 0.01  | 0.02  | 0.00  | 0.01  | 0.10  | -0.01 | 0.07  |
| 17   | 1  | 0.02  | -0.01 | 0.00  | 0.02  | 0.01  | 0.01  | 0.10  | -0.10 | 0.05  |
| 18   | 1  | 0.04  | -0.01 | 0.02  | 0.00  | 0.01  | 0.00  | 0.20  | -0.10 | 0.13  |
| 19   | 1  | 0.00  | -0.01 | -0.01 | 0.03  | 0.00  | 0.03  | -0.01 | -0.05 | -0.02 |
| 20   | 6  | -0.03 | 0.06  | -0.02 | -0.04 | 0.02  | -0.03 | -0.11 | -0.07 | 0.09  |
| 21   | 1  | -0.03 | 0.09  | -0.01 | -0.05 | 0.05  | -0.01 | -0.14 | -0.12 | 0.10  |
| 22   | 6  | 0.02  | 0.00  | 0.03  | 0.01  | -0.01 | 0.00  | -0.05 | -0.01 | -0.01 |
| 23   | 1  | -0.01 | -0.05 | -0.01 | 0.02  | -0.03 | 0.06  | -0.03 | 0.18  | -0.18 |
| 24   | 1  | 0.06  | -0.10 | 0.11  | -0.03 | 0.00  | 0.01  | 0.01  | 0.14  | -0.17 |
| 25   | 1  | -0.04 | -0.01 | -0.06 | -0.04 | 0.02  | -0.01 | 0.23  | -0.09 | 0.22  |
| 26   | 6  | -0.05 | -0.09 | 0.03  | 0.02  | 0.03  | -0.01 | -0.04 | -0.01 | -0.04 |
| 27   | 1  | 0.02  | -0.03 | -0.04 | 0.00  | 0.00  | 0.01  | -0.13 | -0.05 | 0.03  |
| 28   | 1  | -0.11 | -0.12 | -0.02 | 0.03  | 0.04  | 0.01  | 0.08  | 0.01  | 0.03  |
| 29   | 6  | 0.01  | -0.01 | -0.02 | 0.00  | -0.04 | 0.00  | 0.01  | 0.19  | -0.11 |
| 30   | 1  | 0.01  | -0.01 | -0.02 | -0.02 | -0.06 | 0.02  | 0.09  | 0.36  | -0.13 |
| 31   | 1  | -0.01 | 0.02  | 0.00  | -0.01 | -0.02 | -0.03 | 0.06  | 0.14  | 0.03  |
| 32   | 6  | 0.01  | 0.00  | -0.01 | 0.02  | 0.02  | -0.04 | 0.00  | -0.08 | 0.04  |
| 33   | 1  | 0.01  | 0.02  | -0.01 | 0.06  | -0.07 | -0.02 | -0.19 | 0.10  | -0.09 |
| 34   | 6  | 0.01  | 0.00  | -0.02 | -0.01 | 0.03  | 0.03  | 0.01  | -0.08 | -0.06 |
| 35   | 1  | 0.02  | 0.02  | -0.04 | 0.04  | -0.03 | 0.09  | -0.27 | 0.03  | -0.16 |
| 36   | 6  | -0.02 | 0.00  | -0.09 | 0.00  | 0.01  | -0.02 | 0.00  | 0.00  | -0.03 |
| 37   | 1  | -0.12 | 0.01  | -0.17 | 0.02  | -0.02 | 0.04  | -0.06 | 0.01  | -0.09 |
| 38   | 1  | -0.10 | 0.03  | -0.13 | -0.01 | -0.01 | -0.07 | -0.04 | 0.02  | -0.03 |
| 39   | 1  | -0.04 | 0.01  | 0.08  | 0.00  | -0.02 | -0.03 | -0.01 | 0.01  | 0.07  |
| 40   | 6  | -0.02 | 0.04  | 0.05  | 0.01  | -0.03 | 0.00  | 0.00  | 0.05  | -0.10 |
| 41   | 1  | 0.04  | 0.15  | -0.05 | -0.04 | -0.08 | 0.03  | 0.06  | 0.04  | -0.05 |
| 42   | 6  | 0.07  | 0.05  | -0.13 | -0.02 | -0.01 | 0.05  | 0.00  | 0.00  | 0.00  |
| 43   | 1  | -0.04 | 0.03  | -0.02 | 0.04  | 0.00  | -0.01 | 0.01  | 0.00  | -0.01 |
| 44   | 1  | -0.04 | 0.04  | -0.09 | 0.02  | -0.01 | 0.04  | 0.01  | 0.00  | 0.00  |
| 45   | 1  | 0.04  | 0.14  | -0.33 | 0.00  | -0.04 | 0.14  | 0.00  | -0.01 | 0.02  |
| 46   | 6  | -0.03 | 0.03  | -0.06 | 0.01  | -0.05 | 0.01  | -0.01 | 0.00  | 0.01  |

|    |   |       |       |       |       |       |       |       |       |       |
|----|---|-------|-------|-------|-------|-------|-------|-------|-------|-------|
| 47 | 1 | -0.06 | -0.02 | 0.02  | 0.01  | -0.01 | -0.04 | -0.06 | 0.00  | 0.06  |
| 48 | 6 | -0.10 | 0.08  | 0.01  | 0.04  | -0.03 | 0.00  | 0.00  | 0.00  | 0.00  |
| 49 | 1 | -0.04 | 0.24  | 0.02  | 0.05  | -0.08 | 0.03  | -0.01 | -0.02 | 0.00  |
| 50 | 1 | -0.10 | -0.07 | -0.16 | 0.05  | 0.04  | 0.08  | -0.01 | 0.00  | 0.00  |
| 51 | 6 | -0.01 | -0.02 | 0.17  | -0.03 | 0.02  | -0.06 | 0.01  | 0.00  | 0.01  |
| 52 | 1 | 0.02  | -0.03 | 0.17  | -0.04 | 0.03  | -0.06 | 0.01  | 0.01  | 0.01  |
| 53 | 6 | 0.00  | 0.05  | -0.02 | 0.00  | -0.03 | 0.01  | 0.00  | 0.00  | 0.00  |
| 54 | 1 | -0.26 | 0.08  | 0.19  | 0.08  | -0.03 | -0.04 | -0.01 | 0.00  | 0.00  |
| 55 | 6 | 0.02  | 0.00  | -0.06 | 0.00  | 0.00  | 0.02  | 0.00  | 0.00  | 0.00  |
| 56 | 1 | -0.19 | -0.02 | 0.18  | 0.05  | 0.02  | -0.05 | 0.00  | 0.00  | 0.00  |
| 57 | 6 | 0.02  | -0.03 | -0.04 | -0.01 | 0.01  | 0.02  | 0.00  | 0.00  | 0.00  |
| 58 | 1 | -0.28 | 0.02  | 0.18  | 0.10  | 0.00  | -0.05 | -0.02 | 0.00  | 0.02  |
| 59 | 8 | -0.02 | -0.02 | -0.02 | -0.02 | -0.01 | 0.00  | 0.10  | 0.05  | 0.06  |
| 60 | 8 | -0.03 | -0.02 | 0.02  | -0.13 | -0.09 | 0.03  | -0.01 | -0.02 | 0.01  |
| 61 | 8 | 0.01  | -0.04 | -0.01 | -0.03 | 0.02  | 0.03  | -0.01 | 0.01  | -0.01 |
| 62 | 6 | 0.07  | -0.04 | -0.02 | 0.29  | -0.16 | -0.03 | 0.02  | -0.03 | -0.01 |
| 63 | 6 | -0.01 | 0.02  | -0.01 | -0.03 | 0.06  | -0.04 | 0.00  | 0.00  | -0.01 |
| 64 | 6 | 0.01  | 0.01  | -0.03 | 0.04  | 0.02  | -0.09 | 0.01  | 0.00  | -0.02 |
| 65 | 8 | -0.01 | 0.02  | -0.03 | -0.05 | 0.08  | -0.09 | 0.00  | 0.02  | -0.02 |
| 66 | 1 | 0.08  | -0.05 | 0.03  | 0.37  | -0.21 | 0.20  | 0.04  | -0.02 | 0.01  |
| 67 | 6 | 0.00  | 0.01  | -0.01 | 0.01  | 0.02  | -0.03 | 0.01  | 0.01  | 0.00  |
| 68 | 1 | -0.01 | -0.06 | 0.00  | -0.02 | -0.23 | 0.02  | -0.01 | -0.03 | 0.00  |
| 69 | 1 | -0.01 | -0.01 | 0.02  | -0.02 | -0.08 | 0.07  | 0.00  | 0.01  | 0.02  |
| 70 | 1 | 0.00  | 0.06  | 0.05  | 0.03  | 0.24  | 0.21  | 0.00  | 0.04  | 0.03  |
| 71 | 6 | -0.04 | 0.01  | 0.04  | -0.13 | 0.04  | 0.15  | -0.02 | 0.00  | 0.02  |
| 72 | 1 | -0.03 | 0.00  | 0.05  | -0.10 | -0.01 | 0.21  | -0.02 | 0.00  | 0.03  |
| 73 | 1 | -0.01 | -0.01 | 0.02  | 0.02  | -0.03 | 0.06  | -0.01 | 0.00  | 0.02  |
| 74 | 1 | -0.05 | 0.01  | 0.08  | -0.17 | 0.02  | 0.30  | -0.03 | 0.00  | 0.04  |

|                |  |          |  |          |  |          |
|----------------|--|----------|--|----------|--|----------|
|                |  | 73       |  | 74       |  | 75       |
|                |  | A        |  | A        |  | A        |
| Frequencies -- |  | 796.7954 |  | 802.8851 |  | 810.0882 |
| Red. masses -- |  | 3.7833   |  | 1.7632   |  | 3.7229   |
| Frc consts --  |  | 1.4152   |  | 0.6697   |  | 1.4394   |
| IR Inten --    |  | 15.3191  |  | 51.1580  |  | 0.7347   |
| Raman Activ -- |  | 3.7433   |  | 3.2321   |  | 13.0197  |
| Depolar (P) -- |  | 0.6559   |  | 0.6289   |  | 0.6108   |
| Depolar (U) -- |  | 0.7922   |  | 0.7722   |  | 0.7584   |

| Atom | AN | X     | Y     | Z     | X     | Y     | Z     | X     | Y     | Z     |
|------|----|-------|-------|-------|-------|-------|-------|-------|-------|-------|
| 1    | 6  | -0.07 | 0.18  | 0.11  | 0.00  | 0.00  | 0.00  | -0.05 | -0.09 | -0.01 |
| 2    | 6  | -0.04 | -0.05 | -0.01 | 0.00  | 0.00  | 0.00  | 0.01  | 0.04  | -0.02 |
| 3    | 6  | -0.02 | 0.06  | -0.02 | 0.00  | 0.00  | 0.00  | 0.03  | 0.15  | -0.17 |
| 4    | 6  | 0.10  | -0.06 | -0.05 | 0.01  | 0.00  | 0.00  | 0.03  | -0.05 | -0.02 |
| 5    | 6  | 0.08  | 0.05  | -0.08 | -0.01 | -0.03 | 0.05  | 0.01  | 0.02  | -0.07 |
| 6    | 6  | -0.03 | 0.02  | 0.00  | -0.01 | 0.00  | 0.02  | 0.01  | -0.04 | 0.00  |
| 7    | 8  | -0.02 | -0.07 | -0.01 | 0.00  | 0.00  | 0.00  | 0.02  | 0.05  | 0.01  |
| 8    | 6  | -0.01 | 0.04  | -0.01 | 0.00  | 0.00  | 0.00  | 0.00  | 0.00  | 0.01  |
| 9    | 6  | 0.04  | 0.01  | 0.06  | 0.00  | 0.00  | 0.00  | -0.08 | 0.00  | -0.04 |
| 10   | 1  | -0.01 | -0.04 | 0.08  | 0.00  | 0.00  | 0.00  | -0.07 | 0.03  | -0.04 |
| 11   | 8  | -0.04 | -0.13 | 0.00  | 0.00  | 0.00  | 0.00  | 0.03  | 0.02  | -0.01 |
| 12   | 6  | 0.03  | -0.04 | -0.09 | 0.01  | 0.01  | 0.00  | -0.04 | 0.00  | 0.06  |
| 13   | 1  | -0.07 | -0.08 | -0.05 | 0.01  | 0.01  | -0.01 | -0.08 | -0.04 | 0.10  |
| 14   | 6  | -0.03 | 0.00  | -0.04 | 0.11  | -0.01 | -0.09 | -0.01 | 0.00  | -0.03 |

|    |   |       |       |       |       |       |       |       |       |       |
|----|---|-------|-------|-------|-------|-------|-------|-------|-------|-------|
| 15 | 8 | 0.03  | 0.00  | 0.02  | 0.02  | -0.01 | -0.03 | 0.02  | 0.00  | 0.01  |
| 16 | 6 | 0.05  | 0.00  | 0.04  | 0.00  | 0.00  | 0.00  | -0.01 | 0.00  | -0.01 |
| 17 | 1 | 0.04  | -0.04 | 0.00  | 0.00  | 0.00  | 0.00  | 0.00  | -0.02 | 0.00  |
| 18 | 1 | 0.14  | -0.06 | 0.07  | 0.01  | 0.00  | 0.00  | 0.00  | -0.01 | 0.00  |
| 19 | 1 | 0.00  | -0.03 | -0.03 | 0.00  | 0.00  | 0.00  | -0.04 | 0.00  | -0.02 |
| 20 | 6 | -0.08 | 0.14  | 0.00  | 0.00  | 0.00  | 0.00  | 0.02  | -0.08 | 0.03  |
| 21 | 1 | -0.09 | 0.23  | 0.04  | -0.01 | 0.01  | 0.00  | 0.04  | -0.16 | -0.02 |
| 22 | 6 | 0.03  | 0.01  | 0.09  | 0.00  | 0.00  | 0.00  | -0.01 | -0.03 | 0.01  |
| 23 | 1 | -0.11 | -0.05 | -0.22 | 0.00  | 0.00  | 0.00  | 0.03  | 0.13  | -0.07 |
| 24 | 1 | 0.28  | -0.31 | 0.31  | 0.00  | 0.00  | 0.00  | 0.00  | 0.12  | -0.13 |
| 25 | 1 | -0.01 | -0.07 | -0.13 | 0.00  | 0.00  | 0.00  | 0.19  | -0.08 | 0.19  |
| 26 | 6 | 0.04  | 0.01  | 0.01  | -0.01 | -0.02 | 0.00  | 0.13  | -0.01 | 0.11  |
| 27 | 1 | 0.06  | 0.01  | -0.01 | 0.00  | -0.02 | 0.00  | 0.51  | 0.06  | -0.13 |
| 28 | 1 | 0.01  | 0.02  | -0.01 | 0.00  | -0.03 | 0.00  | -0.15 | -0.19 | -0.13 |
| 29 | 6 | -0.01 | 0.03  | -0.05 | 0.00  | 0.00  | 0.00  | 0.01  | 0.05  | -0.02 |
| 30 | 1 | 0.03  | 0.10  | -0.06 | 0.00  | 0.00  | 0.00  | 0.03  | 0.08  | -0.03 |
| 31 | 1 | -0.02 | 0.10  | 0.07  | 0.00  | 0.00  | 0.00  | 0.03  | 0.01  | -0.01 |
| 32 | 6 | 0.04  | -0.01 | -0.01 | 0.00  | 0.00  | 0.00  | 0.00  | -0.03 | 0.03  |
| 33 | 1 | -0.01 | 0.13  | -0.03 | 0.00  | 0.00  | 0.00  | -0.12 | 0.06  | -0.05 |
| 34 | 6 | 0.04  | -0.04 | -0.09 | 0.00  | 0.00  | 0.00  | 0.01  | -0.02 | 0.01  |
| 35 | 1 | -0.03 | 0.07  | -0.20 | 0.00  | 0.00  | 0.00  | -0.13 | 0.04  | -0.04 |
| 36 | 6 | 0.03  | -0.01 | 0.04  | 0.00  | 0.00  | -0.02 | 0.01  | -0.01 | 0.02  |
| 37 | 1 | -0.11 | 0.02  | -0.10 | -0.03 | 0.00  | -0.03 | -0.03 | 0.06  | -0.11 |
| 38 | 1 | -0.07 | 0.02  | 0.01  | -0.02 | 0.01  | -0.03 | 0.00  | 0.04  | 0.10  |
| 39 | 1 | 0.01  | 0.01  | 0.26  | -0.01 | 0.00  | 0.03  | 0.01  | 0.05  | 0.07  |
| 40 | 6 | 0.01  | -0.05 | 0.03  | 0.00  | 0.00  | 0.00  | 0.01  | 0.04  | 0.22  |
| 41 | 1 | 0.00  | -0.04 | 0.01  | 0.01  | 0.01  | 0.00  | -0.07 | 0.20  | 0.01  |
| 42 | 6 | -0.01 | 0.00  | 0.02  | 0.01  | 0.02  | -0.05 | 0.02  | 0.00  | -0.04 |
| 43 | 1 | 0.03  | 0.00  | -0.02 | 0.03  | 0.01  | -0.06 | 0.01  | 0.08  | -0.07 |
| 44 | 1 | 0.03  | 0.00  | 0.00  | 0.04  | 0.02  | -0.09 | -0.02 | 0.01  | 0.10  |
| 45 | 1 | 0.00  | -0.03 | 0.09  | 0.01  | 0.00  | -0.02 | 0.03  | 0.09  | -0.10 |
| 46 | 6 | 0.00  | -0.09 | 0.01  | 0.01  | 0.04  | -0.01 | -0.01 | -0.06 | 0.01  |
| 47 | 1 | -0.08 | -0.02 | -0.01 | 0.03  | 0.00  | 0.02  | 0.00  | -0.02 | -0.05 |
| 48 | 6 | 0.02  | -0.03 | 0.00  | -0.03 | 0.03  | 0.02  | 0.00  | 0.01  | 0.02  |
| 49 | 1 | 0.07  | -0.01 | 0.05  | -0.01 | 0.13  | 0.00  | 0.02  | 0.08  | 0.02  |
| 50 | 1 | 0.07  | 0.03  | 0.07  | -0.02 | -0.06 | -0.08 | 0.09  | 0.01  | 0.04  |
| 51 | 6 | -0.08 | 0.04  | -0.05 | -0.02 | -0.03 | 0.05  | -0.06 | 0.02  | -0.02 |
| 52 | 1 | -0.12 | 0.04  | -0.07 | -0.10 | -0.04 | 0.00  | -0.09 | 0.02  | -0.03 |
| 53 | 6 | 0.00  | -0.04 | 0.01  | -0.03 | 0.02  | 0.03  | -0.01 | -0.02 | 0.01  |
| 54 | 1 | 0.05  | -0.04 | 0.00  | 0.17  | -0.02 | -0.18 | 0.03  | -0.02 | 0.01  |
| 55 | 6 | 0.01  | 0.00  | 0.02  | -0.05 | 0.01  | 0.04  | 0.01  | 0.00  | 0.01  |
| 56 | 1 | 0.03  | 0.04  | -0.03 | 0.33  | -0.07 | -0.33 | 0.00  | 0.03  | 0.00  |
| 57 | 6 | 0.00  | 0.02  | 0.02  | -0.11 | 0.01  | 0.11  | 0.00  | 0.02  | 0.01  |
| 58 | 1 | 0.10  | 0.01  | -0.03 | 0.54  | -0.09 | -0.54 | 0.06  | 0.00  | -0.02 |
| 59 | 8 | -0.01 | -0.01 | -0.03 | 0.00  | 0.00  | 0.00  | -0.11 | -0.05 | -0.10 |
| 60 | 8 | -0.01 | 0.04  | -0.04 | 0.00  | 0.00  | 0.00  | 0.03  | -0.02 | 0.03  |
| 61 | 8 | -0.04 | 0.04  | 0.04  | 0.01  | -0.02 | -0.01 | -0.01 | 0.03  | 0.02  |
| 62 | 6 | 0.01  | 0.04  | 0.03  | 0.00  | 0.00  | 0.00  | -0.02 | -0.01 | -0.02 |
| 63 | 6 | 0.00  | 0.00  | 0.01  | 0.00  | 0.00  | 0.00  | 0.00  | -0.01 | 0.00  |
| 64 | 6 | -0.02 | 0.00  | 0.02  | 0.00  | 0.00  | 0.00  | 0.02  | 0.00  | -0.01 |
| 65 | 8 | -0.01 | -0.03 | 0.03  | 0.00  | 0.00  | 0.00  | 0.01  | 0.02  | -0.02 |
| 66 | 1 | 0.00  | -0.01 | 0.04  | 0.01  | 0.00  | 0.00  | -0.04 | 0.03  | -0.06 |

|    |   |       |       |       |      |      |      |       |       |       |
|----|---|-------|-------|-------|------|------|------|-------|-------|-------|
| 67 | 6 | -0.01 | -0.02 | 0.00  | 0.00 | 0.00 | 0.00 | 0.01  | 0.01  | 0.00  |
| 68 | 1 | 0.02  | 0.04  | 0.01  | 0.00 | 0.00 | 0.00 | -0.02 | -0.01 | -0.01 |
| 69 | 1 | 0.00  | -0.06 | -0.05 | 0.00 | 0.00 | 0.00 | 0.00  | 0.06  | 0.03  |
| 70 | 1 | 0.01  | -0.05 | -0.04 | 0.00 | 0.01 | 0.00 | -0.01 | 0.01  | 0.01  |
| 71 | 6 | 0.02  | 0.00  | -0.03 | 0.00 | 0.00 | 0.00 | -0.01 | 0.00  | 0.02  |
| 72 | 1 | 0.02  | 0.00  | -0.02 | 0.00 | 0.00 | 0.00 | -0.01 | 0.01  | 0.00  |
| 73 | 1 | 0.04  | 0.00  | -0.04 | 0.00 | 0.00 | 0.00 | -0.03 | 0.01  | 0.03  |
| 74 | 1 | 0.03  | 0.00  | -0.04 | 0.00 | 0.00 | 0.00 | -0.01 | 0.00  | 0.00  |

|                |  |  |          |  |  |          |  |  |
|----------------|--|--|----------|--|--|----------|--|--|
| 76             |  |  | 77       |  |  | 78       |  |  |
| A              |  |  | A        |  |  | A        |  |  |
| Frequencies -- |  |  | 831.3156 |  |  | 843.0694 |  |  |
| Red. masses -- |  |  | 4.1813   |  |  | 2.3243   |  |  |
| Frc consts --  |  |  | 1.7025   |  |  | 0.9733   |  |  |
| IR Inten --    |  |  | 15.1706  |  |  | 32.2094  |  |  |
| Raman Activ -- |  |  | 6.9360   |  |  | 5.1332   |  |  |
| Depolar (P) -- |  |  | 0.7493   |  |  | 0.3503   |  |  |
| Depolar (U) -- |  |  | 0.8567   |  |  | 0.5189   |  |  |

|      |   |       |       |       |       |       |       |       |       |       |   |
|------|---|-------|-------|-------|-------|-------|-------|-------|-------|-------|---|
| Atom |   | AN    | X     | Y     | Z     | X     | Y     | Z     | X     | Y     | Z |
| 1    | 6 | -0.02 | 0.01  | 0.00  | 0.02  | -0.01 | 0.05  | -0.03 | -0.08 | -0.10 |   |
| 2    | 6 | -0.01 | 0.00  | 0.00  | 0.18  | -0.09 | 0.11  | -0.01 | 0.02  | 0.02  |   |
| 3    | 6 | 0.00  | 0.04  | -0.06 | -0.01 | 0.02  | -0.03 | 0.03  | 0.00  | -0.09 |   |
| 4    | 6 | 0.05  | -0.01 | 0.00  | -0.01 | -0.01 | 0.00  | -0.04 | 0.01  | -0.02 |   |
| 5    | 6 | -0.06 | -0.04 | 0.28  | -0.02 | 0.00  | 0.00  | -0.10 | -0.04 | -0.01 |   |
| 6    | 6 | -0.14 | 0.02  | -0.02 | 0.00  | -0.01 | 0.00  | -0.05 | -0.02 | -0.03 |   |
| 7    | 8 | 0.00  | 0.00  | 0.00  | -0.05 | 0.01  | -0.02 | 0.01  | 0.01  | 0.01  |   |
| 8    | 6 | 0.00  | 0.00  | 0.00  | -0.06 | 0.00  | -0.02 | -0.07 | -0.01 | -0.03 |   |
| 9    | 6 | 0.02  | 0.00  | 0.00  | 0.01  | 0.00  | 0.00  | 0.16  | -0.04 | 0.13  |   |
| 10   | 1 | 0.01  | -0.02 | 0.00  | 0.03  | 0.02  | -0.01 | 0.24  | -0.09 | 0.08  |   |
| 11   | 8 | -0.01 | -0.01 | 0.00  | 0.02  | 0.00  | -0.02 | -0.02 | 0.03  | 0.00  |   |
| 12   | 6 | 0.02  | 0.03  | 0.00  | 0.01  | -0.01 | -0.01 | 0.02  | 0.00  | -0.05 |   |
| 13   | 1 | 0.04  | 0.04  | -0.02 | 0.01  | -0.01 | -0.01 | -0.06 | 0.04  | -0.11 |   |
| 14   | 6 | -0.10 | 0.01  | -0.03 | 0.00  | 0.00  | 0.00  | 0.05  | -0.01 | 0.05  |   |
| 15   | 8 | 0.04  | -0.01 | 0.05  | 0.00  | 0.00  | 0.00  | -0.04 | 0.01  | -0.04 |   |
| 16   | 6 | 0.00  | 0.00  | 0.00  | 0.08  | -0.03 | 0.06  | 0.08  | -0.02 | 0.08  |   |
| 17   | 1 | -0.01 | 0.00  | -0.01 | 0.08  | 0.01  | 0.07  | -0.03 | 0.01  | -0.07 |   |
| 18   | 1 | 0.02  | 0.00  | 0.01  | 0.02  | 0.01  | 0.03  | 0.22  | -0.02 | 0.07  |   |
| 19   | 1 | 0.00  | 0.00  | 0.00  | 0.13  | -0.01 | 0.12  | 0.18  | -0.03 | 0.04  |   |
| 20   | 6 | -0.01 | 0.01  | 0.00  | -0.04 | -0.03 | 0.03  | -0.14 | 0.04  | -0.06 |   |
| 21   | 1 | 0.00  | 0.02  | 0.00  | -0.10 | -0.07 | 0.07  | -0.23 | 0.25  | 0.09  |   |
| 22   | 6 | 0.01  | -0.01 | 0.02  | -0.05 | 0.05  | -0.07 | 0.05  | -0.06 | 0.05  |   |
| 23   | 1 | 0.00  | 0.01  | -0.03 | -0.11 | 0.02  | -0.19 | 0.11  | -0.04 | 0.20  |   |
| 24   | 1 | 0.04  | -0.02 | 0.02  | 0.06  | -0.06 | 0.00  | -0.09 | 0.10  | -0.06 |   |
| 25   | 1 | 0.03  | -0.02 | 0.02  | -0.05 | 0.01  | -0.13 | 0.04  | -0.01 | 0.14  |   |
| 26   | 6 | 0.03  | -0.03 | 0.00  | 0.02  | 0.00  | 0.02  | 0.06  | 0.03  | 0.02  |   |
| 27   | 1 | 0.08  | -0.13 | 0.02  | 0.09  | 0.02  | -0.03 | 0.17  | -0.04 | -0.01 |   |
| 28   | 1 | 0.05  | -0.05 | 0.00  | -0.04 | -0.05 | -0.03 | 0.01  | 0.01  | -0.02 |   |
| 29   | 6 | -0.01 | 0.01  | 0.00  | -0.02 | 0.03  | 0.00  | -0.01 | 0.01  | -0.04 |   |
| 30   | 1 | 0.00  | 0.02  | 0.00  | 0.02  | 0.10  | -0.02 | 0.02  | 0.10  | -0.04 |   |
| 31   | 1 | -0.01 | 0.01  | 0.01  | 0.02  | -0.05 | 0.03  | 0.03  | -0.06 | 0.00  |   |
| 32   | 6 | 0.01  | 0.00  | 0.00  | -0.06 | 0.05  | -0.06 | 0.06  | -0.02 | -0.05 |   |
| 33   | 1 | -0.02 | 0.03  | -0.02 | 0.45  | -0.32 | 0.29  | -0.05 | 0.00  | -0.14 |   |
| 34   | 6 | 0.01  | -0.01 | 0.00  | -0.09 | 0.06  | -0.07 | 0.00  | 0.03  | 0.06  |   |

|    |   |       |       |       |       |       |       |       |       |       |
|----|---|-------|-------|-------|-------|-------|-------|-------|-------|-------|
| 35 | 1 | -0.03 | 0.02  | -0.02 | 0.40  | -0.29 | 0.26  | -0.19 | 0.05  | 0.05  |
| 36 | 6 | 0.00  | 0.00  | -0.05 | 0.00  | 0.00  | 0.01  | 0.01  | 0.00  | 0.07  |
| 37 | 1 | -0.12 | 0.01  | -0.14 | 0.01  | 0.01  | 0.00  | 0.05  | -0.01 | 0.11  |
| 38 | 1 | -0.11 | 0.04  | -0.09 | 0.01  | 0.00  | 0.03  | 0.04  | -0.02 | 0.07  |
| 39 | 1 | -0.02 | 0.01  | 0.18  | 0.00  | 0.01  | -0.01 | 0.02  | -0.01 | 0.00  |
| 40 | 6 | 0.03  | -0.02 | 0.05  | 0.00  | 0.01  | 0.03  | 0.00  | 0.04  | 0.07  |
| 41 | 1 | 0.02  | 0.00  | 0.02  | -0.01 | 0.05  | -0.01 | -0.08 | 0.04  | 0.03  |
| 42 | 6 | -0.03 | 0.03  | -0.05 | 0.01  | 0.00  | -0.01 | -0.02 | -0.01 | 0.01  |
| 43 | 1 | 0.10  | 0.04  | -0.19 | 0.00  | 0.01  | -0.01 | 0.04  | 0.03  | -0.07 |
| 44 | 1 | 0.11  | 0.03  | -0.12 | -0.01 | 0.00  | 0.01  | 0.02  | -0.01 | 0.06  |
| 45 | 1 | 0.00  | -0.08 | 0.18  | 0.01  | 0.02  | -0.03 | 0.00  | -0.02 | 0.10  |
| 46 | 6 | 0.12  | 0.26  | 0.05  | 0.00  | 0.01  | 0.00  | -0.02 | 0.03  | 0.01  |
| 47 | 1 | -0.09 | 0.12  | 0.43  | 0.02  | 0.00  | -0.01 | 0.14  | -0.01 | -0.07 |
| 48 | 6 | 0.06  | -0.04 | -0.07 | 0.00  | 0.00  | 0.00  | -0.02 | 0.04  | 0.00  |
| 49 | 1 | 0.06  | -0.28 | 0.02  | 0.00  | 0.00  | 0.00  | -0.13 | -0.05 | -0.10 |
| 50 | 1 | -0.28 | 0.05  | -0.02 | 0.00  | 0.00  | 0.00  | -0.02 | 0.02  | -0.01 |
| 51 | 6 | -0.06 | -0.05 | -0.12 | 0.00  | 0.00  | 0.00  | 0.12  | -0.03 | 0.03  |
| 52 | 1 | -0.15 | -0.01 | -0.12 | -0.01 | 0.00  | -0.01 | 0.17  | -0.01 | 0.08  |
| 53 | 6 | 0.00  | -0.06 | 0.00  | 0.00  | 0.00  | 0.00  | 0.00  | 0.06  | 0.01  |
| 54 | 1 | 0.07  | -0.04 | 0.04  | 0.01  | 0.00  | 0.00  | 0.01  | 0.04  | -0.07 |
| 55 | 6 | 0.03  | -0.01 | 0.01  | 0.00  | 0.00  | 0.00  | 0.00  | 0.01  | -0.02 |
| 56 | 1 | -0.10 | 0.09  | 0.09  | -0.01 | 0.00  | 0.01  | -0.03 | -0.07 | 0.06  |
| 57 | 6 | 0.03  | 0.05  | -0.02 | 0.00  | 0.00  | 0.00  | 0.00  | -0.05 | 0.00  |
| 58 | 1 | -0.08 | 0.07  | 0.12  | -0.01 | 0.00  | 0.01  | -0.05 | -0.04 | 0.02  |
| 59 | 8 | -0.03 | -0.03 | -0.01 | -0.01 | 0.00  | -0.01 | -0.02 | -0.01 | -0.02 |
| 60 | 8 | -0.01 | 0.00  | 0.00  | 0.00  | 0.00  | 0.00  | -0.06 | 0.04  | -0.09 |
| 61 | 8 | 0.04  | -0.09 | -0.07 | 0.00  | -0.01 | 0.00  | 0.02  | -0.02 | 0.00  |
| 62 | 6 | 0.00  | -0.01 | 0.00  | 0.00  | 0.00  | 0.00  | 0.03  | 0.06  | 0.03  |
| 63 | 6 | 0.00  | 0.00  | 0.00  | 0.00  | 0.00  | 0.00  | 0.01  | 0.03  | 0.02  |
| 64 | 6 | 0.00  | 0.00  | -0.01 | 0.00  | 0.00  | 0.00  | -0.03 | 0.02  | 0.02  |
| 65 | 8 | 0.00  | 0.00  | 0.00  | 0.00  | 0.00  | 0.00  | -0.02 | -0.04 | 0.03  |
| 66 | 1 | 0.03  | -0.02 | 0.02  | 0.00  | 0.00  | 0.01  | 0.10  | -0.05 | 0.14  |
| 67 | 6 | 0.00  | 0.01  | 0.00  | 0.00  | 0.00  | 0.00  | -0.03 | -0.04 | -0.01 |
| 68 | 1 | 0.00  | -0.01 | 0.00  | 0.00  | 0.00  | 0.00  | 0.05  | 0.03  | 0.03  |
| 69 | 1 | 0.00  | -0.01 | 0.00  | 0.00  | -0.01 | -0.01 | 0.00  | -0.16 | -0.09 |
| 70 | 1 | 0.00  | 0.02  | 0.02  | 0.00  | 0.00  | 0.00  | 0.04  | -0.04 | -0.02 |
| 71 | 6 | 0.00  | 0.00  | 0.00  | 0.00  | 0.00  | 0.00  | 0.03  | 0.00  | -0.03 |
| 72 | 1 | 0.00  | 0.00  | 0.01  | 0.00  | 0.00  | 0.00  | 0.05  | -0.03 | -0.05 |
| 73 | 1 | 0.00  | 0.00  | 0.00  | 0.00  | 0.00  | 0.00  | 0.05  | -0.02 | -0.05 |
| 74 | 1 | 0.00  | 0.00  | 0.01  | 0.00  | 0.00  | 0.00  | 0.00  | -0.01 | 0.01  |

79

80

81

A

A

A

|                |          |          |          |
|----------------|----------|----------|----------|
| Frequencies -- | 862.9942 | 870.9888 | 886.3304 |
| Red. masses -- | 3.1444   | 1.3412   | 2.0080   |
| Frc consts --  | 1.3798   | 0.5995   | 0.9294   |
| IR Inten --    | 10.4041  | 1.8110   | 9.5352   |
| Raman Activ -- | 13.1553  | 2.3985   | 6.1863   |
| Depolar (P) -- | 0.2230   | 0.6567   | 0.7498   |
| Depolar (U) -- | 0.3647   | 0.7928   | 0.8570   |

| Atom | AN | X     | Y     | Z     | X    | Y    | Z    | X     | Y    | Z    |
|------|----|-------|-------|-------|------|------|------|-------|------|------|
| 1    | 6  | -0.02 | 0.06  | 0.08  | 0.00 | 0.00 | 0.00 | 0.01  | 0.02 | 0.02 |
| 2    | 6  | -0.01 | -0.01 | -0.01 | 0.00 | 0.00 | 0.00 | -0.02 | 0.00 | 0.00 |

|    |   |       |       |       |       |       |       |       |       |       |
|----|---|-------|-------|-------|-------|-------|-------|-------|-------|-------|
| 3  | 6 | 0.03  | 0.03  | -0.07 | 0.00  | 0.01  | -0.01 | 0.02  | -0.01 | -0.01 |
| 4  | 6 | 0.04  | -0.04 | -0.03 | 0.00  | 0.00  | 0.00  | -0.02 | -0.05 | 0.00  |
| 5  | 6 | -0.04 | -0.05 | -0.01 | 0.00  | 0.00  | 0.00  | -0.06 | -0.09 | 0.01  |
| 6  | 6 | -0.11 | 0.02  | -0.07 | 0.00  | 0.00  | -0.01 | 0.05  | -0.02 | -0.02 |
| 7  | 8 | 0.00  | -0.01 | 0.00  | 0.00  | 0.00  | 0.00  | 0.00  | -0.01 | 0.00  |
| 8  | 6 | 0.02  | 0.00  | 0.02  | 0.00  | 0.00  | 0.00  | 0.00  | -0.01 | 0.01  |
| 9  | 6 | -0.05 | 0.04  | -0.08 | 0.00  | 0.00  | 0.00  | 0.02  | 0.02  | -0.03 |
| 10 | 1 | -0.10 | 0.05  | -0.05 | 0.01  | 0.00  | 0.00  | 0.03  | 0.03  | -0.03 |
| 11 | 8 | 0.01  | -0.05 | -0.01 | 0.00  | 0.00  | 0.00  | 0.00  | -0.04 | -0.02 |
| 12 | 6 | 0.03  | 0.06  | 0.01  | 0.00  | 0.00  | 0.00  | 0.03  | 0.06  | 0.00  |
| 13 | 1 | 0.09  | 0.05  | 0.02  | 0.00  | 0.00  | 0.00  | 0.07  | 0.07  | -0.01 |
| 14 | 6 | 0.10  | -0.02 | 0.07  | -0.02 | 0.00  | 0.02  | -0.02 | 0.03  | -0.01 |
| 15 | 8 | -0.07 | 0.02  | -0.07 | -0.01 | 0.00  | 0.00  | 0.05  | -0.05 | 0.06  |
| 16 | 6 | -0.03 | 0.01  | -0.03 | 0.00  | 0.00  | 0.00  | 0.00  | 0.00  | 0.00  |
| 17 | 1 | 0.01  | -0.01 | 0.02  | 0.00  | 0.00  | 0.00  | -0.01 | 0.00  | -0.01 |
| 18 | 1 | -0.07 | 0.00  | -0.02 | 0.00  | 0.00  | 0.00  | 0.01  | 0.00  | 0.00  |
| 19 | 1 | -0.07 | 0.01  | -0.02 | 0.01  | 0.00  | 0.00  | 0.01  | 0.00  | 0.00  |
| 20 | 6 | 0.05  | -0.01 | 0.03  | 0.00  | 0.00  | 0.00  | 0.01  | -0.01 | 0.01  |
| 21 | 1 | 0.10  | -0.11 | -0.04 | 0.00  | 0.01  | 0.00  | 0.01  | -0.03 | 0.00  |
| 22 | 6 | -0.03 | 0.03  | 0.00  | 0.00  | 0.00  | 0.00  | -0.01 | 0.01  | 0.00  |
| 23 | 1 | -0.10 | 0.06  | -0.22 | 0.00  | 0.00  | 0.00  | -0.02 | 0.00  | -0.04 |
| 24 | 1 | 0.13  | -0.10 | 0.08  | 0.00  | 0.00  | 0.00  | 0.02  | -0.03 | 0.02  |
| 25 | 1 | 0.03  | -0.04 | -0.05 | 0.01  | 0.00  | 0.01  | -0.01 | 0.00  | -0.03 |
| 26 | 6 | 0.02  | 0.05  | -0.06 | 0.00  | 0.00  | 0.00  | 0.00  | 0.03  | -0.02 |
| 27 | 1 | -0.04 | -0.18 | 0.08  | 0.00  | -0.01 | 0.00  | -0.03 | 0.00  | 0.02  |
| 28 | 1 | 0.12  | 0.22  | 0.07  | 0.01  | 0.01  | 0.00  | 0.00  | 0.09  | 0.02  |
| 29 | 6 | -0.02 | 0.02  | 0.04  | 0.00  | 0.00  | 0.00  | -0.03 | 0.03  | 0.04  |
| 30 | 1 | -0.01 | 0.01  | 0.02  | 0.00  | 0.00  | 0.00  | -0.01 | 0.04  | 0.03  |
| 31 | 1 | -0.03 | 0.06  | 0.06  | 0.00  | 0.00  | 0.00  | -0.03 | 0.03  | 0.06  |
| 32 | 6 | -0.02 | 0.00  | 0.02  | 0.00  | 0.00  | 0.00  | 0.00  | 0.00  | 0.00  |
| 33 | 1 | 0.01  | 0.03  | 0.04  | 0.00  | 0.00  | 0.00  | -0.01 | 0.02  | -0.01 |
| 34 | 6 | 0.01  | -0.02 | -0.04 | 0.00  | 0.00  | 0.00  | 0.01  | -0.01 | 0.00  |
| 35 | 1 | 0.05  | -0.01 | -0.05 | 0.00  | 0.00  | 0.00  | -0.02 | 0.01  | -0.02 |
| 36 | 6 | 0.02  | -0.02 | 0.02  | 0.00  | 0.00  | 0.00  | -0.01 | -0.02 | 0.00  |
| 37 | 1 | -0.06 | 0.04  | -0.12 | 0.00  | 0.00  | 0.00  | 0.01  | 0.04  | -0.08 |
| 38 | 1 | -0.02 | 0.03  | 0.07  | 0.00  | 0.00  | 0.00  | 0.05  | 0.02  | 0.13  |
| 39 | 1 | 0.01  | 0.04  | 0.13  | 0.00  | 0.00  | 0.01  | 0.00  | 0.05  | -0.03 |
| 40 | 6 | 0.02  | -0.02 | 0.06  | 0.00  | 0.00  | 0.01  | -0.01 | 0.02  | 0.01  |
| 41 | 1 | -0.02 | -0.04 | 0.07  | 0.00  | 0.01  | 0.00  | -0.04 | 0.00  | 0.02  |
| 42 | 6 | -0.07 | -0.01 | 0.05  | 0.00  | 0.00  | 0.01  | 0.02  | -0.02 | 0.03  |
| 43 | 1 | 0.12  | -0.02 | -0.12 | 0.00  | 0.00  | 0.00  | -0.09 | -0.03 | 0.14  |
| 44 | 1 | 0.12  | -0.01 | -0.03 | 0.00  | 0.00  | 0.02  | -0.09 | -0.03 | 0.07  |
| 45 | 1 | -0.02 | -0.17 | 0.39  | 0.00  | 0.00  | 0.01  | -0.01 | 0.05  | -0.16 |
| 46 | 6 | -0.04 | 0.00  | 0.02  | 0.00  | 0.00  | 0.00  | -0.01 | 0.01  | 0.05  |
| 47 | 1 | 0.03  | -0.02 | -0.01 | -0.02 | 0.00  | 0.02  | 0.14  | -0.01 | -0.05 |
| 48 | 6 | -0.02 | 0.03  | -0.03 | 0.01  | 0.00  | -0.01 | -0.03 | 0.01  | 0.07  |
| 49 | 1 | -0.16 | -0.19 | -0.11 | 0.00  | -0.05 | 0.00  | -0.11 | 0.22  | -0.11 |
| 50 | 1 | -0.10 | 0.08  | 0.01  | -0.02 | 0.02  | 0.01  | 0.18  | -0.11 | -0.04 |
| 51 | 6 | 0.17  | -0.02 | 0.06  | 0.01  | 0.00  | 0.00  | 0.00  | -0.01 | -0.03 |
| 52 | 1 | 0.26  | 0.05  | 0.16  | 0.03  | 0.01  | 0.02  | 0.01  | -0.11 | -0.11 |
| 53 | 6 | 0.01  | 0.10  | 0.01  | 0.10  | -0.02 | -0.10 | -0.02 | 0.00  | -0.03 |
| 54 | 1 | -0.03 | 0.07  | -0.09 | -0.58 | 0.11  | 0.58  | 0.01  | 0.03  | 0.04  |



|    |   |       |       |       |       |       |       |       |       |       |
|----|---|-------|-------|-------|-------|-------|-------|-------|-------|-------|
| 55 | 6 | -0.01 | 0.02  | -0.02 | -0.06 | 0.01  | 0.06  | -0.04 | -0.03 | -0.03 |
| 56 | 1 | 0.01  | -0.13 | 0.07  | 0.37  | -0.06 | -0.37 | -0.06 | 0.08  | -0.09 |
| 57 | 6 | -0.01 | -0.09 | 0.00  | 0.00  | 0.00  | 0.00  | 0.02  | 0.05  | 0.00  |
| 58 | 1 | -0.04 | -0.09 | 0.01  | 0.04  | -0.01 | -0.04 | -0.05 | 0.07  | -0.05 |
| 59 | 8 | -0.02 | -0.04 | 0.01  | 0.00  | -0.01 | 0.00  | 0.00  | 0.00  | 0.00  |
| 60 | 8 | 0.02  | -0.02 | 0.03  | 0.00  | 0.00  | 0.00  | 0.01  | 0.02  | -0.01 |
| 61 | 8 | 0.01  | 0.00  | 0.01  | 0.00  | 0.00  | 0.00  | 0.02  | 0.05  | -0.06 |
| 62 | 6 | -0.02 | -0.04 | -0.01 | 0.00  | 0.00  | 0.00  | -0.07 | 0.00  | -0.01 |
| 63 | 6 | 0.00  | -0.02 | -0.01 | 0.00  | 0.00  | 0.00  | 0.04  | -0.03 | 0.03  |
| 64 | 6 | 0.01  | -0.01 | -0.03 | 0.00  | 0.00  | 0.00  | -0.03 | 0.02  | -0.04 |
| 65 | 8 | 0.01  | 0.02  | -0.01 | 0.00  | 0.00  | 0.00  | 0.01  | -0.01 | 0.00  |
| 66 | 1 | 0.06  | -0.03 | 0.01  | 0.00  | 0.00  | 0.00  | 0.45  | -0.25 | 0.37  |
| 67 | 6 | 0.01  | 0.03  | 0.00  | 0.00  | 0.00  | 0.00  | -0.03 | 0.03  | -0.03 |
| 68 | 1 | -0.01 | -0.03 | 0.01  | 0.00  | 0.00  | 0.00  | 0.09  | -0.05 | 0.08  |
| 69 | 1 | 0.00  | 0.03  | 0.04  | 0.00  | 0.00  | 0.00  | 0.00  | -0.26 | -0.06 |
| 70 | 1 | 0.00  | 0.08  | 0.06  | 0.00  | 0.00  | 0.00  | 0.11  | 0.22  | 0.17  |
| 71 | 6 | -0.02 | 0.00  | 0.02  | 0.00  | 0.00  | 0.00  | -0.01 | -0.01 | 0.01  |
| 72 | 1 | -0.04 | 0.02  | 0.05  | 0.00  | 0.00  | 0.00  | -0.02 | 0.00  | 0.04  |
| 73 | 1 | -0.01 | 0.01  | 0.02  | 0.00  | 0.00  | 0.00  | 0.02  | 0.00  | 0.00  |
| 74 | 1 | 0.01  | 0.01  | 0.01  | 0.00  | 0.00  | 0.00  | 0.01  | 0.00  | 0.02  |

|                |          |    |          |    |          |    |
|----------------|----------|----|----------|----|----------|----|
|                |          | 82 |          | 83 |          | 84 |
|                |          | A  |          | A  |          | A  |
| Frequencies -- | 892.2404 |    | 892.8982 |    | 897.6559 |    |
| Red. masses -- | 2.2877   |    | 3.8788   |    | 2.8466   |    |
| Frc consts --  | 1.0730   |    | 1.8220   |    | 1.3514   |    |
| IR Inten --    | 16.1490  |    | 30.4383  |    | 6.9061   |    |
| Raman Activ -- | 13.2213  |    | 1.8183   |    | 4.3578   |    |
| Depolar (P) -- | 0.7494   |    | 0.7486   |    | 0.7130   |    |
| Depolar (U) -- | 0.8568   |    | 0.8563   |    | 0.8324   |    |

| Atom | AN | X     | Y     | Z     | X     | Y     | Z     | X     | Y     | Z     |
|------|----|-------|-------|-------|-------|-------|-------|-------|-------|-------|
| 1    | 6  | -0.03 | -0.01 | -0.04 | 0.10  | 0.03  | 0.10  | -0.02 | 0.00  | -0.02 |
| 2    | 6  | 0.04  | -0.01 | 0.00  | -0.11 | 0.03  | -0.01 | 0.02  | 0.00  | 0.00  |
| 3    | 6  | -0.08 | 0.00  | -0.02 | 0.18  | -0.05 | 0.14  | -0.02 | 0.02  | -0.05 |
| 4    | 6  | -0.01 | -0.02 | -0.01 | -0.03 | -0.01 | 0.04  | 0.01  | 0.00  | 0.00  |
| 5    | 6  | 0.04  | 0.05  | -0.01 | -0.03 | 0.00  | 0.00  | -0.05 | -0.11 | 0.04  |
| 6    | 6  | 0.00  | 0.00  | 0.03  | -0.01 | 0.01  | 0.02  | 0.06  | -0.02 | -0.04 |
| 7    | 8  | 0.00  | 0.01  | 0.00  | 0.01  | -0.04 | 0.00  | 0.00  | 0.00  | 0.00  |
| 8    | 6  | 0.03  | 0.01  | 0.00  | -0.07 | -0.02 | 0.00  | 0.01  | 0.00  | 0.00  |
| 9    | 6  | 0.00  | 0.00  | 0.01  | 0.00  | 0.01  | -0.04 | 0.02  | 0.00  | 0.00  |
| 10   | 1  | 0.01  | -0.03 | 0.00  | 0.02  | 0.08  | -0.04 | 0.01  | 0.00  | 0.00  |
| 11   | 8  | -0.01 | 0.01  | 0.01  | 0.03  | -0.03 | -0.03 | -0.01 | -0.01 | 0.00  |
| 12   | 6  | 0.00  | 0.00  | 0.02  | 0.01  | -0.01 | 0.00  | 0.02  | 0.04  | -0.02 |
| 13   | 1  | -0.04 | -0.02 | 0.03  | 0.04  | -0.01 | -0.01 | 0.05  | 0.07  | -0.04 |
| 14   | 6  | -0.01 | -0.05 | -0.01 | -0.02 | -0.05 | 0.00  | -0.05 | -0.05 | -0.03 |
| 15   | 8  | -0.07 | 0.10  | -0.09 | -0.07 | 0.09  | -0.08 | -0.07 | 0.11  | -0.09 |
| 16   | 6  | -0.02 | 0.01  | -0.02 | 0.04  | -0.01 | 0.05  | -0.01 | 0.00  | -0.01 |
| 17   | 1  | 0.02  | 0.00  | 0.03  | -0.05 | 0.00  | -0.07 | 0.00  | 0.00  | 0.00  |
| 18   | 1  | -0.07 | 0.01  | -0.02 | 0.16  | -0.02 | 0.06  | -0.01 | 0.00  | -0.01 |
| 19   | 1  | -0.05 | 0.01  | -0.01 | 0.11  | -0.03 | 0.02  | -0.01 | 0.00  | 0.00  |
| 20   | 6  | 0.01  | 0.01  | -0.02 | -0.02 | -0.05 | 0.06  | 0.00  | 0.01  | -0.01 |
| 21   | 1  | 0.05  | 0.04  | -0.04 | -0.11 | -0.16 | 0.10  | 0.02  | 0.04  | -0.02 |
| 22   | 6  | 0.02  | -0.03 | 0.03  | -0.05 | 0.08  | -0.10 | 0.01  | -0.01 | 0.02  |

|    |   |       |       |       |       |       |       |       |       |       |
|----|---|-------|-------|-------|-------|-------|-------|-------|-------|-------|
| 23 | 1 | 0.03  | 0.01  | 0.02  | -0.07 | -0.06 | 0.03  | 0.00  | 0.01  | -0.03 |
| 24 | 1 | 0.02  | 0.01  | 0.00  | -0.11 | 0.00  | -0.02 | 0.04  | -0.02 | 0.02  |
| 25 | 1 | 0.06  | -0.04 | 0.07  | -0.22 | 0.14  | -0.22 | 0.04  | -0.03 | 0.04  |
| 26 | 6 | 0.01  | -0.02 | 0.01  | -0.02 | 0.00  | 0.09  | 0.00  | 0.03  | -0.06 |
| 27 | 1 | 0.02  | 0.03  | -0.02 | 0.13  | 0.17  | -0.08 | -0.11 | -0.09 | 0.06  |
| 28 | 1 | 0.02  | -0.10 | -0.02 | -0.21 | -0.14 | -0.08 | 0.08  | 0.20  | 0.06  |
| 29 | 6 | 0.02  | -0.03 | 0.00  | -0.06 | 0.07  | 0.01  | 0.00  | 0.00  | 0.02  |
| 30 | 1 | -0.02 | -0.09 | 0.02  | 0.05  | 0.23  | -0.03 | -0.02 | -0.03 | 0.02  |
| 31 | 1 | -0.01 | 0.03  | -0.04 | 0.03  | -0.07 | 0.12  | -0.02 | 0.03  | 0.00  |
| 32 | 6 | -0.02 | 0.00  | 0.02  | 0.06  | -0.01 | -0.05 | -0.01 | 0.00  | 0.01  |
| 33 | 1 | 0.02  | -0.05 | 0.05  | -0.07 | 0.14  | -0.13 | 0.01  | -0.02 | 0.02  |
| 34 | 6 | -0.02 | 0.00  | -0.01 | 0.05  | -0.01 | 0.02  | -0.01 | 0.00  | 0.00  |
| 35 | 1 | 0.06  | -0.02 | 0.02  | -0.17 | 0.06  | -0.05 | 0.02  | -0.01 | 0.00  |
| 36 | 6 | 0.00  | -0.01 | 0.01  | -0.03 | 0.01  | -0.03 | 0.01  | -0.01 | 0.00  |
| 37 | 1 | -0.01 | 0.02  | -0.04 | 0.09  | -0.02 | 0.08  | -0.03 | 0.01  | -0.05 |
| 38 | 1 | 0.01  | 0.01  | 0.06  | 0.06  | -0.03 | 0.00  | -0.02 | 0.01  | 0.01  |
| 39 | 1 | 0.00  | 0.03  | 0.00  | -0.01 | -0.01 | -0.21 | 0.00  | 0.01  | 0.07  |
| 40 | 6 | 0.00  | 0.03  | -0.04 | 0.00  | -0.08 | 0.03  | -0.01 | 0.03  | 0.01  |
| 41 | 1 | 0.05  | 0.07  | -0.06 | -0.14 | -0.21 | 0.11  | 0.01  | 0.04  | 0.00  |
| 42 | 6 | 0.01  | 0.01  | -0.03 | 0.01  | 0.01  | -0.04 | 0.02  | -0.03 | 0.05  |
| 43 | 1 | 0.02  | 0.02  | -0.04 | 0.01  | 0.04  | -0.05 | -0.11 | -0.06 | 0.19  |
| 44 | 1 | 0.02  | 0.01  | -0.03 | 0.00  | 0.02  | 0.00  | -0.11 | -0.04 | 0.08  |
| 45 | 1 | 0.01  | 0.01  | -0.01 | 0.01  | 0.03  | -0.03 | -0.02 | 0.04  | -0.18 |
| 46 | 6 | 0.01  | -0.01 | -0.02 | 0.02  | 0.02  | 0.01  | -0.01 | 0.02  | 0.05  |
| 47 | 1 | -0.11 | 0.01  | 0.06  | 0.02  | 0.01  | 0.02  | 0.17  | 0.00  | -0.07 |
| 48 | 6 | 0.02  | -0.02 | -0.03 | 0.00  | -0.02 | -0.01 | -0.03 | 0.00  | 0.10  |
| 49 | 1 | 0.10  | -0.09 | 0.08  | -0.01 | -0.05 | -0.02 | -0.11 | 0.30  | -0.11 |
| 50 | 1 | -0.08 | 0.05  | 0.03  | -0.02 | -0.01 | 0.00  | 0.26  | -0.15 | -0.04 |
| 51 | 6 | -0.04 | 0.01  | 0.01  | -0.01 | 0.00  | -0.02 | -0.03 | -0.01 | -0.05 |
| 52 | 1 | -0.06 | 0.06  | 0.04  | -0.01 | 0.01  | -0.01 | -0.01 | -0.15 | -0.16 |
| 53 | 6 | 0.04  | -0.06 | 0.06  | 0.05  | -0.05 | 0.04  | 0.05  | -0.11 | 0.06  |
| 54 | 1 | -0.03 | -0.09 | -0.04 | -0.07 | -0.08 | 0.01  | -0.05 | -0.15 | -0.02 |
| 55 | 6 | 0.08  | 0.05  | 0.07  | 0.07  | 0.05  | 0.07  | 0.10  | 0.05  | 0.09  |
| 56 | 1 | 0.11  | -0.09 | 0.14  | 0.12  | -0.09 | 0.11  | 0.13  | -0.07 | 0.15  |
| 57 | 6 | -0.03 | -0.05 | -0.02 | -0.02 | -0.04 | -0.02 | -0.03 | -0.02 | -0.03 |
| 58 | 1 | 0.11  | -0.08 | 0.11  | 0.09  | -0.07 | 0.11  | 0.13  | -0.06 | 0.14  |
| 59 | 8 | 0.02  | -0.01 | 0.05  | -0.03 | 0.08  | -0.14 | 0.01  | -0.03 | 0.03  |
| 60 | 8 | 0.02  | 0.02  | -0.01 | 0.01  | 0.01  | 0.00  | -0.02 | -0.01 | 0.00  |
| 61 | 8 | -0.01 | -0.02 | 0.02  | 0.01  | -0.01 | -0.01 | 0.01  | 0.07  | -0.08 |
| 62 | 6 | -0.09 | 0.03  | -0.01 | -0.01 | 0.00  | 0.00  | 0.06  | -0.03 | 0.01  |
| 63 | 6 | 0.05  | -0.03 | 0.04  | 0.01  | -0.01 | 0.01  | -0.03 | 0.02  | -0.03 |
| 64 | 6 | -0.03 | 0.02  | -0.04 | -0.01 | 0.00  | -0.01 | 0.02  | -0.02 | 0.02  |
| 65 | 8 | 0.02  | -0.01 | -0.01 | 0.00  | 0.00  | 0.00  | -0.01 | 0.01  | 0.01  |
| 66 | 1 | 0.48  | -0.25 | 0.40  | 0.09  | -0.05 | 0.07  | -0.29 | 0.15  | -0.25 |
| 67 | 6 | -0.04 | 0.02  | -0.03 | -0.01 | 0.00  | -0.01 | 0.03  | -0.01 | 0.02  |
| 68 | 1 | 0.10  | -0.04 | 0.09  | 0.02  | -0.01 | 0.02  | -0.06 | 0.02  | -0.05 |
| 69 | 1 | -0.01 | -0.30 | -0.08 | 0.00  | -0.05 | -0.01 | 0.00  | 0.19  | 0.05  |
| 70 | 1 | 0.12  | 0.21  | 0.16  | 0.02  | 0.04  | 0.03  | -0.07 | -0.13 | -0.09 |
| 71 | 6 | 0.00  | -0.01 | 0.01  | 0.00  | 0.00  | 0.00  | 0.00  | 0.00  | 0.00  |
| 72 | 1 | 0.00  | -0.01 | 0.02  | 0.00  | 0.00  | 0.01  | 0.00  | 0.00  | 0.00  |
| 73 | 1 | 0.01  | -0.01 | 0.00  | 0.00  | 0.00  | 0.00  | 0.00  | 0.00  | 0.00  |
| 74 | 1 | 0.01  | -0.01 | 0.01  | 0.00  | 0.00  | 0.00  | 0.00  | 0.00  | 0.00  |

|                |    |  | 85       |       |       | 86       |       |       | 87       |       |       |
|----------------|----|--|----------|-------|-------|----------|-------|-------|----------|-------|-------|
|                |    |  | A        |       |       | A        |       |       | A        |       |       |
| Frequencies -- |    |  | 917.3279 |       |       | 924.8345 |       |       | 933.4560 |       |       |
| Red. masses -- |    |  | 3.0276   |       |       | 2.4609   |       |       | 2.3695   |       |       |
| Frc consts --  |    |  | 1.5011   |       |       | 1.2401   |       |       | 1.2165   |       |       |
| IR Inten --    |    |  | 16.3893  |       |       | 53.3900  |       |       | 35.1689  |       |       |
| Raman Activ -- |    |  | 6.5524   |       |       | 2.0903   |       |       | 4.3679   |       |       |
| Depolar (P) -- |    |  | 0.7435   |       |       | 0.2313   |       |       | 0.5275   |       |       |
| Depolar (U) -- |    |  | 0.8529   |       |       | 0.3757   |       |       | 0.6907   |       |       |
| Atom           | AN |  | X        | Y     | Z     | X        | Y     | Z     | X        | Y     | Z     |
| 1              | 6  |  | 0.01     | -0.01 | 0.05  | 0.00     | 0.00  | -0.01 | 0.06     | -0.01 | -0.06 |
| 2              | 6  |  | -0.01    | 0.00  | 0.00  | 0.00     | 0.00  | 0.01  | -0.01    | 0.00  | 0.01  |
| 3              | 6  |  | 0.07     | 0.08  | 0.03  | 0.00     | -0.01 | 0.01  | -0.05    | 0.13  | -0.03 |
| 4              | 6  |  | 0.06     | 0.07  | 0.02  | 0.01     | 0.05  | -0.06 | -0.02    | -0.01 | 0.01  |
| 5              | 6  |  | 0.04     | -0.05 | 0.03  | -0.03    | 0.00  | 0.00  | 0.06     | 0.01  | 0.01  |
| 6              | 6  |  | 0.01     | 0.03  | -0.04 | 0.00     | -0.01 | -0.01 | 0.02     | 0.06  | 0.01  |
| 7              | 8  |  | 0.00     | 0.01  | 0.00  | 0.00     | -0.01 | 0.00  | 0.00     | -0.01 | 0.00  |
| 8              | 6  |  | -0.01    | -0.01 | 0.00  | -0.02    | 0.01  | -0.01 | -0.07    | -0.03 | 0.00  |
| 9              | 6  |  | -0.05    | -0.11 | 0.06  | -0.03    | -0.02 | 0.03  | 0.03     | 0.04  | -0.02 |
| 10             | 1  |  | 0.00     | -0.22 | 0.02  | -0.14    | 0.00  | 0.09  | 0.05     | 0.17  | -0.01 |
| 11             | 8  |  | -0.01    | 0.13  | 0.05  | -0.02    | 0.05  | 0.05  | 0.04     | -0.05 | -0.05 |
| 12             | 6  |  | -0.07    | -0.08 | 0.06  | -0.01    | -0.07 | -0.09 | -0.03    | -0.03 | -0.01 |
| 13             | 1  |  | -0.08    | -0.08 | 0.06  | 0.01     | -0.13 | -0.02 | -0.11    | -0.07 | 0.03  |
| 14             | 6  |  | 0.00     | 0.00  | 0.00  | -0.01    | 0.00  | 0.00  | 0.01     | 0.00  | -0.01 |
| 15             | 8  |  | 0.00     | 0.00  | 0.00  | 0.00     | 0.00  | 0.00  | 0.00     | 0.00  | 0.00  |
| 16             | 6  |  | 0.01     | -0.01 | 0.00  | 0.03     | 0.00  | 0.02  | 0.02     | -0.02 | 0.05  |
| 17             | 1  |  | 0.02     | 0.00  | 0.02  | 0.02     | -0.02 | 0.01  | -0.09    | 0.03  | -0.10 |
| 18             | 1  |  | -0.02    | 0.01  | -0.01 | 0.04     | -0.02 | 0.03  | 0.14     | 0.00  | 0.03  |
| 19             | 1  |  | 0.02     | 0.00  | 0.01  | 0.00     | -0.01 | -0.01 | 0.16     | -0.02 | 0.03  |
| 20             | 6  |  | 0.01     | -0.04 | 0.00  | -0.02    | 0.02  | 0.02  | 0.01     | -0.03 | 0.00  |
| 21             | 1  |  | -0.02    | -0.08 | 0.02  | -0.05    | 0.05  | 0.04  | -0.04    | -0.01 | 0.04  |
| 22             | 6  |  | -0.03    | 0.02  | -0.03 | 0.00     | 0.00  | 0.00  | 0.04     | -0.02 | -0.02 |
| 23             | 1  |  | -0.05    | 0.03  | -0.08 | 0.01     | -0.01 | 0.04  | 0.11     | -0.09 | 0.24  |
| 24             | 1  |  | 0.01     | -0.01 | -0.01 | -0.02    | 0.01  | -0.01 | -0.14    | 0.08  | -0.06 |
| 25             | 1  |  | 0.00     | 0.00  | -0.02 | -0.02    | 0.01  | -0.01 | -0.09    | 0.07  | -0.02 |
| 26             | 6  |  | -0.04    | 0.00  | -0.10 | 0.00     | 0.01  | 0.00  | -0.05    | -0.06 | -0.09 |
| 27             | 1  |  | -0.19    | -0.22 | 0.10  | 0.01     | 0.01  | 0.00  | -0.22    | -0.23 | 0.09  |
| 28             | 1  |  | 0.05     | 0.30  | 0.10  | -0.01    | 0.02  | 0.00  | 0.09     | 0.17  | 0.10  |
| 29             | 6  |  | 0.07     | -0.04 | -0.14 | 0.03     | -0.04 | -0.09 | -0.09    | 0.06  | 0.06  |
| 30             | 1  |  | 0.05     | 0.00  | -0.11 | 0.04     | 0.04  | -0.07 | 0.04     | 0.21  | 0.00  |
| 31             | 1  |  | 0.11     | -0.14 | -0.16 | 0.06     | -0.11 | -0.04 | 0.00     | -0.08 | 0.17  |
| 32             | 6  |  | -0.01    | 0.01  | 0.01  | 0.01     | 0.00  | -0.01 | 0.03     | 0.00  | -0.04 |
| 33             | 1  |  | 0.00     | 0.05  | 0.04  | 0.01     | 0.01  | -0.01 | 0.01     | 0.00  | -0.05 |
| 34             | 6  |  | 0.01     | 0.00  | -0.01 | 0.00     | 0.01  | 0.01  | 0.00     | 0.02  | 0.04  |
| 35             | 1  |  | 0.05     | 0.00  | -0.01 | -0.01    | 0.01  | 0.01  | -0.10    | 0.01  | 0.05  |
| 36             | 6  |  | 0.02     | 0.04  | -0.05 | 0.04     | 0.03  | 0.04  | -0.01    | -0.01 | 0.00  |
| 37             | 1  |  | -0.06    | -0.07 | 0.08  | -0.02    | -0.08 | 0.18  | 0.01     | 0.02  | -0.03 |
| 38             | 1  |  | -0.13    | -0.02 | -0.33 | -0.09    | -0.03 | -0.21 | 0.02     | 0.00  | 0.04  |
| 39             | 1  |  | -0.01    | -0.10 | 0.12  | 0.01     | -0.10 | 0.18  | 0.00     | 0.02  | -0.06 |
| 40             | 6  |  | 0.03     | -0.07 | 0.08  | -0.01    | 0.00  | 0.00  | 0.04     | -0.03 | 0.05  |
| 41             | 1  |  | 0.08     | -0.04 | 0.06  | -0.02    | -0.01 | 0.00  | 0.23     | 0.13  | -0.05 |
| 42             | 6  |  | -0.02    | 0.00  | 0.06  | 0.00     | -0.01 | 0.01  | 0.00     | 0.05  | 0.04  |

|    |   |       |       |       |       |       |       |       |       |       |
|----|---|-------|-------|-------|-------|-------|-------|-------|-------|-------|
| 43 | 1 | -0.01 | -0.10 | 0.10  | -0.02 | 0.00  | 0.02  | -0.03 | -0.17 | 0.19  |
| 44 | 1 | 0.03  | 0.00  | -0.11 | -0.03 | -0.01 | 0.04  | 0.04  | 0.03  | -0.31 |
| 45 | 1 | -0.04 | -0.11 | 0.13  | 0.00  | 0.01  | -0.03 | -0.05 | -0.15 | 0.06  |
| 46 | 6 | -0.03 | -0.02 | 0.00  | 0.01  | 0.02  | 0.00  | -0.02 | -0.03 | -0.03 |
| 47 | 1 | -0.08 | 0.00  | 0.02  | 0.13  | -0.01 | -0.06 | -0.23 | 0.02  | 0.07  |
| 48 | 6 | 0.00  | -0.02 | 0.03  | -0.02 | 0.02  | 0.02  | 0.03  | -0.05 | -0.01 |
| 49 | 1 | 0.00  | 0.08  | -0.01 | -0.04 | 0.06  | -0.03 | 0.12  | -0.04 | 0.09  |
| 50 | 1 | 0.11  | -0.05 | 0.01  | 0.01  | -0.03 | -0.04 | 0.02  | -0.01 | 0.03  |
| 51 | 6 | 0.00  | 0.02  | 0.00  | 0.01  | -0.02 | -0.01 | -0.02 | 0.05  | 0.02  |
| 52 | 1 | 0.02  | -0.03 | -0.03 | 0.03  | -0.05 | -0.03 | -0.02 | 0.04  | 0.02  |
| 53 | 6 | 0.00  | -0.01 | 0.00  | 0.00  | -0.01 | 0.00  | -0.01 | -0.01 | 0.00  |
| 54 | 1 | 0.00  | -0.01 | -0.02 | 0.00  | -0.01 | 0.01  | 0.00  | -0.02 | -0.03 |
| 55 | 6 | 0.00  | 0.00  | 0.00  | 0.00  | 0.00  | 0.01  | 0.00  | 0.00  | 0.00  |
| 56 | 1 | 0.00  | 0.00  | 0.00  | 0.01  | 0.00  | 0.00  | -0.01 | 0.01  | 0.00  |
| 57 | 6 | 0.00  | 0.00  | 0.00  | 0.00  | 0.00  | 0.00  | 0.00  | 0.00  | 0.00  |
| 58 | 1 | 0.01  | 0.00  | 0.01  | 0.00  | 0.00  | 0.00  | 0.01  | -0.01 | -0.01 |
| 59 | 8 | -0.02 | -0.02 | -0.05 | 0.00  | 0.00  | -0.01 | -0.01 | -0.04 | 0.02  |
| 60 | 8 | 0.00  | -0.01 | 0.00  | 0.05  | 0.07  | 0.04  | 0.01  | 0.02  | 0.01  |
| 61 | 8 | 0.00  | 0.05  | -0.04 | -0.01 | -0.02 | 0.01  | 0.00  | 0.02  | -0.01 |
| 62 | 6 | -0.04 | 0.06  | -0.02 | -0.06 | -0.05 | 0.02  | 0.00  | 0.00  | 0.00  |
| 63 | 6 | 0.03  | 0.04  | 0.04  | -0.03 | -0.12 | -0.04 | -0.01 | -0.03 | -0.01 |
| 64 | 6 | -0.02 | 0.03  | 0.02  | 0.02  | -0.07 | -0.08 | 0.00  | -0.01 | -0.02 |
| 65 | 8 | 0.01  | -0.01 | -0.03 | 0.01  | 0.02  | 0.02  | 0.00  | 0.00  | 0.00  |
| 66 | 1 | 0.17  | -0.03 | 0.18  | 0.01  | -0.18 | -0.06 | 0.00  | -0.04 | -0.02 |
| 67 | 6 | -0.05 | -0.05 | -0.02 | 0.07  | 0.14  | 0.02  | 0.02  | 0.03  | 0.00  |
| 68 | 1 | 0.07  | 0.04  | 0.04  | -0.07 | -0.14 | -0.01 | -0.02 | -0.03 | 0.00  |
| 69 | 1 | 0.00  | -0.22 | -0.13 | -0.01 | 0.25  | 0.24  | 0.00  | 0.06  | 0.05  |
| 70 | 1 | 0.06  | -0.05 | -0.03 | -0.04 | 0.31  | 0.22  | -0.01 | 0.07  | 0.05  |
| 71 | 6 | 0.03  | 0.02  | -0.01 | -0.05 | -0.06 | 0.02  | -0.01 | -0.02 | 0.00  |
| 72 | 1 | 0.10  | -0.06 | -0.13 | -0.24 | 0.16  | 0.29  | -0.06 | 0.04  | 0.08  |
| 73 | 1 | -0.03 | -0.05 | 0.00  | 0.04  | 0.14  | 0.03  | 0.02  | 0.04  | 0.00  |
| 74 | 1 | -0.08 | -0.02 | 0.06  | 0.23  | 0.04  | -0.20 | 0.07  | 0.01  | -0.05 |

|                |  |          |  |          |  |          |
|----------------|--|----------|--|----------|--|----------|
|                |  | 88       |  | 89       |  | 90       |
|                |  | A        |  | A        |  | A        |
| Frequencies -- |  | 944.6300 |  | 955.2738 |  | 959.3293 |
| Red. masses -- |  | 3.0138   |  | 2.0619   |  | 2.2075   |
| Frc consts --  |  | 1.5845   |  | 1.1086   |  | 1.1970   |
| IR Inten --    |  | 55.3146  |  | 11.9495  |  | 37.8196  |
| Raman Activ -- |  | 7.8419   |  | 6.7222   |  | 4.4382   |
| Depolar (P) -- |  | 0.2732   |  | 0.1666   |  | 0.1804   |
| Depolar (U) -- |  | 0.4292   |  | 0.2856   |  | 0.3056   |

|    | Atom | AN    | X     | Y     | Z     | X     | Y     | Z     | X     | Y     | Z |
|----|------|-------|-------|-------|-------|-------|-------|-------|-------|-------|---|
| 1  | 6    | 0.03  | 0.00  | -0.02 | -0.02 | -0.03 | -0.01 | -0.06 | -0.02 | -0.02 |   |
| 2  | 6    | -0.01 | 0.00  | 0.01  | 0.03  | -0.01 | 0.02  | 0.04  | -0.01 | 0.03  |   |
| 3  | 6    | -0.03 | 0.03  | -0.01 | -0.01 | 0.03  | 0.07  | 0.03  | -0.02 | 0.07  |   |
| 4  | 6    | 0.05  | 0.03  | -0.03 | 0.01  | -0.03 | 0.01  | 0.04  | 0.05  | 0.00  |   |
| 5  | 6    | -0.02 | 0.13  | -0.05 | -0.03 | -0.02 | -0.01 | -0.01 | -0.02 | 0.01  |   |
| 6  | 6    | 0.04  | -0.03 | -0.07 | -0.02 | 0.07  | 0.03  | -0.01 | 0.01  | -0.01 |   |
| 7  | 8    | 0.00  | -0.01 | 0.00  | 0.00  | 0.01  | 0.00  | 0.00  | 0.02  | 0.00  |   |
| 8  | 6    | -0.03 | 0.02  | 0.00  | 0.03  | 0.12  | 0.01  | 0.06  | 0.01  | 0.06  |   |
| 9  | 6    | -0.06 | 0.07  | -0.04 | -0.03 | 0.04  | -0.02 | 0.04  | 0.01  | 0.01  |   |
| 10 | 1    | -0.10 | 0.17  | 0.00  | -0.10 | 0.03  | 0.02  | 0.14  | 0.07  | -0.03 |   |

|    |   |       |       |       |       |       |       |       |       |       |
|----|---|-------|-------|-------|-------|-------|-------|-------|-------|-------|
| 11 | 8 | 0.03  | -0.04 | -0.02 | -0.02 | 0.00  | 0.03  | 0.03  | -0.07 | -0.09 |
| 12 | 6 | 0.00  | -0.09 | 0.00  | 0.07  | 0.00  | -0.04 | -0.07 | -0.08 | 0.02  |
| 13 | 1 | -0.02 | -0.15 | 0.07  | 0.13  | 0.00  | -0.03 | -0.22 | -0.13 | 0.06  |
| 14 | 6 | -0.02 | -0.01 | -0.02 | -0.01 | 0.00  | 0.01  | 0.00  | 0.00  | 0.01  |
| 15 | 8 | 0.00  | 0.01  | 0.00  | 0.00  | 0.00  | 0.00  | 0.00  | 0.00  | 0.00  |
| 16 | 6 | 0.02  | 0.02  | 0.02  | 0.01  | 0.10  | 0.01  | -0.08 | 0.00  | -0.01 |
| 17 | 1 | 0.01  | -0.05 | -0.02 | 0.08  | -0.19 | 0.01  | -0.21 | 0.08  | -0.18 |
| 18 | 1 | 0.12  | -0.05 | 0.07  | 0.27  | -0.18 | 0.21  | 0.07  | 0.04  | -0.04 |
| 19 | 1 | -0.05 | -0.02 | -0.06 | -0.40 | -0.03 | -0.30 | 0.11  | 0.01  | -0.02 |
| 20 | 6 | 0.00  | 0.01  | 0.03  | -0.04 | 0.03  | 0.02  | -0.02 | 0.04  | -0.04 |
| 21 | 1 | -0.01 | -0.03 | 0.02  | -0.04 | 0.01  | 0.01  | 0.03  | 0.11  | -0.05 |
| 22 | 6 | 0.02  | -0.01 | -0.01 | 0.00  | -0.03 | -0.02 | -0.01 | -0.04 | 0.02  |
| 23 | 1 | 0.05  | -0.04 | 0.11  | 0.06  | 0.03  | 0.08  | 0.02  | 0.07  | -0.01 |
| 24 | 1 | -0.07 | 0.04  | -0.03 | -0.08 | 0.11  | -0.12 | -0.01 | 0.07  | -0.08 |
| 25 | 1 | -0.05 | 0.04  | -0.03 | 0.06  | -0.01 | 0.11  | 0.11  | -0.06 | 0.15  |
| 26 | 6 | -0.01 | 0.01  | -0.06 | 0.00  | -0.06 | 0.03  | 0.02  | 0.00  | 0.01  |
| 27 | 1 | -0.10 | -0.08 | 0.03  | 0.05  | -0.03 | -0.01 | 0.06  | -0.01 | -0.01 |
| 28 | 1 | 0.04  | 0.18  | 0.04  | -0.07 | -0.08 | -0.01 | -0.05 | 0.01  | -0.01 |
| 29 | 6 | -0.05 | 0.00  | 0.03  | 0.02  | -0.11 | 0.02  | 0.04  | 0.08  | 0.12  |
| 30 | 1 | 0.05  | 0.10  | -0.01 | 0.02  | -0.12 | 0.02  | -0.14 | -0.30 | 0.14  |
| 31 | 1 | 0.01  | -0.08 | 0.13  | 0.02  | -0.13 | 0.02  | -0.15 | 0.41  | -0.14 |
| 32 | 6 | 0.02  | -0.01 | -0.04 | 0.00  | -0.02 | -0.04 | -0.01 | -0.01 | -0.03 |
| 33 | 1 | 0.01  | -0.02 | -0.05 | 0.00  | -0.12 | -0.06 | 0.03  | -0.09 | 0.00  |
| 34 | 6 | 0.00  | 0.00  | 0.02  | -0.03 | -0.02 | -0.03 | -0.02 | -0.01 | -0.03 |
| 35 | 1 | -0.08 | -0.01 | 0.02  | -0.02 | -0.10 | 0.04  | 0.04  | -0.12 | 0.07  |
| 36 | 6 | 0.03  | 0.02  | 0.01  | -0.01 | -0.02 | -0.01 | 0.02  | 0.06  | -0.01 |
| 37 | 1 | -0.05 | -0.03 | 0.04  | 0.00  | 0.03  | -0.09 | -0.01 | -0.10 | 0.22  |
| 38 | 1 | -0.09 | 0.01  | -0.15 | 0.04  | 0.01  | 0.10  | -0.12 | -0.04 | -0.34 |
| 39 | 1 | 0.01  | -0.05 | 0.16  | 0.00  | 0.04  | -0.03 | 0.00  | -0.14 | 0.10  |
| 40 | 6 | -0.02 | 0.01  | 0.01  | 0.02  | -0.04 | 0.02  | -0.01 | -0.03 | 0.02  |
| 41 | 1 | 0.03  | 0.05  | -0.01 | 0.10  | 0.04  | -0.04 | -0.01 | -0.05 | 0.03  |
| 42 | 6 | 0.00  | -0.06 | 0.05  | -0.01 | 0.06  | 0.01  | -0.01 | 0.01  | 0.01  |
| 43 | 1 | -0.03 | 0.05  | 0.01  | -0.01 | -0.14 | 0.13  | 0.02  | -0.02 | -0.01 |
| 44 | 1 | -0.08 | -0.06 | 0.26  | 0.07  | 0.05  | -0.32 | 0.03  | 0.01  | -0.05 |
| 45 | 1 | 0.01  | 0.07  | -0.03 | -0.04 | -0.14 | 0.10  | -0.01 | -0.04 | 0.07  |
| 46 | 6 | 0.09  | 0.07  | -0.01 | 0.01  | 0.00  | 0.00  | -0.01 | 0.00  | 0.00  |
| 47 | 1 | 0.37  | -0.03 | -0.12 | 0.13  | 0.01  | -0.13 | 0.04  | 0.00  | -0.05 |
| 48 | 6 | -0.08 | 0.11  | 0.01  | -0.02 | -0.03 | 0.02  | 0.00  | 0.00  | 0.02  |
| 49 | 1 | -0.07 | 0.20  | -0.02 | -0.09 | 0.02  | -0.09 | -0.03 | 0.04  | -0.03 |
| 50 | 1 | -0.16 | -0.04 | -0.17 | 0.08  | -0.07 | -0.02 | 0.06  | -0.02 | 0.01  |
| 51 | 6 | 0.00  | -0.09 | -0.03 | 0.04  | 0.02  | -0.03 | 0.02  | 0.00  | -0.01 |
| 52 | 1 | 0.08  | -0.19 | -0.08 | 0.05  | -0.02 | -0.05 | 0.02  | -0.02 | -0.02 |
| 53 | 6 | 0.00  | -0.03 | 0.01  | 0.00  | 0.00  | 0.00  | 0.00  | 0.00  | 0.00  |
| 54 | 1 | 0.03  | -0.02 | 0.02  | -0.02 | 0.00  | 0.01  | -0.01 | 0.00  | 0.01  |
| 55 | 6 | 0.02  | 0.00  | 0.02  | 0.00  | 0.00  | 0.00  | 0.00  | 0.00  | 0.00  |
| 56 | 1 | 0.01  | 0.02  | 0.01  | 0.00  | 0.00  | 0.00  | 0.00  | 0.00  | 0.00  |
| 57 | 6 | 0.00  | 0.03  | -0.01 | 0.00  | 0.00  | 0.00  | 0.00  | 0.00  | 0.00  |
| 58 | 1 | -0.02 | 0.04  | -0.02 | -0.01 | 0.00  | 0.01  | 0.00  | 0.00  | 0.01  |
| 59 | 8 | 0.01  | -0.02 | 0.02  | 0.00  | 0.03  | -0.05 | 0.00  | 0.03  | -0.06 |
| 60 | 8 | 0.02  | -0.04 | 0.06  | 0.00  | -0.01 | 0.02  | 0.01  | 0.01  | 0.01  |
| 61 | 8 | -0.03 | -0.12 | 0.11  | 0.00  | 0.01  | -0.02 | 0.00  | 0.01  | -0.01 |
| 62 | 6 | -0.02 | 0.01  | -0.03 | 0.00  | 0.00  | -0.01 | -0.01 | 0.01  | 0.00  |

|    |   |       |       |       |       |       |       |       |       |       |
|----|---|-------|-------|-------|-------|-------|-------|-------|-------|-------|
| 63 | 6 | 0.03  | 0.04  | 0.02  | 0.00  | 0.01  | 0.00  | 0.00  | -0.01 | 0.00  |
| 64 | 6 | -0.01 | 0.03  | 0.02  | 0.00  | 0.01  | 0.00  | 0.00  | 0.00  | -0.01 |
| 65 | 8 | 0.01  | 0.01  | -0.04 | 0.00  | 0.00  | 0.00  | 0.00  | 0.00  | -0.01 |
| 66 | 1 | 0.09  | 0.07  | 0.08  | 0.01  | 0.02  | 0.01  | 0.02  | -0.03 | 0.02  |
| 67 | 6 | -0.04 | -0.05 | -0.01 | -0.01 | -0.01 | 0.00  | 0.00  | 0.01  | 0.00  |
| 68 | 1 | 0.05  | 0.07  | 0.02  | 0.01  | 0.02  | 0.00  | 0.00  | -0.01 | 0.00  |
| 69 | 1 | 0.01  | -0.15 | -0.12 | 0.00  | -0.02 | -0.02 | 0.00  | 0.00  | 0.01  |
| 70 | 1 | 0.04  | -0.10 | -0.07 | 0.01  | -0.02 | -0.02 | 0.00  | 0.03  | 0.02  |
| 71 | 6 | 0.02  | 0.03  | 0.01  | 0.00  | 0.01  | 0.00  | 0.00  | -0.01 | 0.00  |
| 72 | 1 | 0.11  | -0.07 | -0.14 | 0.03  | -0.02 | -0.03 | -0.02 | 0.01  | 0.02  |
| 73 | 1 | -0.05 | -0.06 | 0.02  | -0.01 | -0.02 | 0.01  | 0.01  | 0.02  | 0.00  |
| 74 | 1 | -0.13 | -0.02 | 0.09  | -0.03 | 0.00  | 0.02  | 0.02  | 0.00  | -0.02 |

91

92

93

A

A

A

|                |          |          |          |
|----------------|----------|----------|----------|
| Frequencies -- | 961.5710 | 967.0043 | 970.4134 |
| Red. masses -- | 1.8356   | 2.6881   | 2.4793   |
| Frc consts --  | 1.0000   | 1.4810   | 1.3756   |
| IR Inten --    | 31.6338  | 17.1455  | 9.8765   |
| Raman Activ -- | 9.8258   | 3.2892   | 10.5646  |
| Depolar (P) -- | 0.5414   | 0.3612   | 0.4919   |
| Depolar (U) -- | 0.7025   | 0.5307   | 0.6594   |

| Atom | AN | X     | Y     | Z     | X     | Y     | Z     | X     | Y     | Z     |
|------|----|-------|-------|-------|-------|-------|-------|-------|-------|-------|
| 1    | 6  | 0.02  | 0.01  | 0.02  | 0.02  | 0.03  | -0.02 | -0.06 | -0.01 | -0.05 |
| 2    | 6  | -0.03 | 0.01  | 0.03  | -0.03 | 0.00  | 0.00  | 0.06  | -0.02 | -0.02 |
| 3    | 6  | -0.01 | -0.01 | -0.05 | -0.04 | -0.04 | -0.08 | -0.01 | 0.00  | 0.08  |
| 4    | 6  | -0.03 | 0.02  | 0.02  | 0.01  | 0.08  | -0.06 | -0.01 | 0.01  | 0.08  |
| 5    | 6  | 0.03  | -0.02 | 0.04  | -0.08 | -0.06 | 0.05  | 0.03  | -0.05 | 0.05  |
| 6    | 6  | 0.01  | -0.07 | -0.03 | -0.04 | 0.00  | 0.06  | 0.01  | -0.06 | -0.06 |
| 7    | 8  | 0.00  | -0.01 | -0.01 | 0.00  | -0.02 | 0.00  | -0.01 | 0.01  | 0.01  |
| 8    | 6  | 0.00  | 0.08  | 0.06  | -0.04 | -0.01 | -0.01 | 0.00  | 0.00  | -0.08 |
| 9    | 6  | -0.01 | -0.04 | 0.00  | -0.04 | 0.03  | -0.03 | 0.01  | 0.10  | -0.04 |
| 10   | 1  | 0.02  | -0.03 | -0.01 | -0.11 | 0.13  | 0.02  | -0.06 | 0.16  | 0.00  |
| 11   | 8  | 0.02  | 0.01  | -0.02 | 0.02  | -0.01 | -0.01 | 0.00  | -0.03 | 0.02  |
| 12   | 6  | -0.01 | -0.01 | 0.00  | -0.01 | -0.07 | -0.03 | 0.03  | -0.07 | -0.05 |
| 13   | 1  | 0.03  | 0.00  | -0.01 | 0.07  | -0.12 | 0.03  | 0.07  | -0.09 | -0.02 |
| 14   | 6  | 0.02  | 0.00  | -0.01 | 0.01  | 0.01  | 0.03  | 0.02  | 0.00  | -0.01 |
| 15   | 8  | 0.00  | 0.00  | 0.00  | 0.00  | 0.00  | 0.00  | 0.00  | 0.00  | 0.00  |
| 16   | 6  | -0.03 | 0.08  | 0.05  | 0.02  | -0.01 | 0.01  | 0.07  | -0.01 | -0.05 |
| 17   | 1  | -0.15 | -0.12 | -0.20 | 0.03  | -0.01 | 0.02  | 0.31  | -0.05 | 0.29  |
| 18   | 1  | 0.44  | -0.16 | 0.21  | 0.01  | -0.01 | 0.02  | -0.28 | 0.01  | -0.04 |
| 19   | 1  | -0.21 | -0.05 | -0.30 | 0.01  | -0.01 | 0.02  | -0.14 | 0.03  | 0.10  |
| 20   | 6  | 0.02  | -0.01 | 0.01  | 0.02  | 0.02  | 0.02  | -0.04 | 0.05  | -0.01 |
| 21   | 1  | 0.01  | -0.03 | 0.01  | 0.02  | 0.02  | 0.02  | -0.03 | 0.10  | 0.00  |
| 22   | 6  | 0.00  | 0.02  | -0.01 | 0.02  | 0.01  | 0.01  | 0.01  | -0.05 | 0.02  |
| 23   | 1  | -0.02 | -0.01 | -0.02 | 0.00  | -0.04 | 0.01  | 0.06  | 0.02  | 0.08  |
| 24   | 1  | 0.01  | -0.03 | 0.02  | 0.03  | -0.06 | 0.07  | -0.05 | 0.09  | -0.08 |
| 25   | 1  | -0.03 | 0.01  | -0.05 | -0.05 | 0.02  | -0.07 | 0.09  | -0.04 | 0.14  |
| 26   | 6  | 0.02  | 0.07  | -0.04 | 0.01  | 0.01  | 0.08  | 0.06  | 0.07  | -0.04 |
| 27   | 1  | -0.03 | 0.00  | 0.03  | 0.10  | 0.17  | -0.05 | 0.05  | -0.05 | 0.03  |
| 28   | 1  | 0.08  | 0.13  | 0.02  | 0.00  | -0.27 | -0.07 | 0.02  | 0.22  | 0.02  |
| 29   | 6  | 0.00  | -0.03 | 0.03  | -0.05 | 0.00  | 0.00  | -0.07 | -0.05 | 0.04  |
| 30   | 1  | 0.01  | -0.08 | 0.01  | 0.06  | 0.16  | -0.04 | 0.04  | 0.14  | 0.01  |

|    |   |       |       |       |       |       |       |       |       |       |
|----|---|-------|-------|-------|-------|-------|-------|-------|-------|-------|
| 31 | 1 | 0.03  | -0.09 | -0.03 | 0.03  | -0.14 | 0.13  | 0.00  | -0.14 | 0.20  |
| 32 | 6 | 0.02  | -0.02 | -0.08 | 0.02  | 0.00  | -0.01 | -0.01 | 0.00  | 0.07  |
| 33 | 1 | 0.01  | -0.05 | -0.10 | 0.01  | 0.02  | -0.02 | -0.01 | -0.03 | 0.07  |
| 34 | 6 | -0.01 | -0.03 | -0.02 | 0.01  | 0.01  | 0.02  | 0.00  | 0.02  | 0.02  |
| 35 | 1 | -0.04 | -0.16 | 0.09  | -0.06 | 0.04  | -0.01 | 0.00  | 0.14  | -0.09 |
| 36 | 6 | -0.01 | 0.01  | 0.00  | 0.05  | 0.05  | 0.04  | -0.03 | 0.03  | -0.05 |
| 37 | 1 | 0.03  | -0.01 | 0.05  | -0.04 | -0.09 | 0.21  | 0.05  | -0.04 | 0.11  |
| 38 | 1 | 0.01  | -0.01 | -0.03 | -0.14 | -0.02 | -0.30 | 0.02  | -0.04 | -0.12 |
| 39 | 1 | -0.01 | -0.01 | -0.06 | 0.02  | -0.13 | 0.25  | -0.03 | -0.04 | -0.18 |
| 40 | 6 | -0.02 | 0.03  | 0.00  | 0.01  | 0.03  | -0.08 | -0.04 | -0.03 | 0.04  |
| 41 | 1 | -0.11 | -0.05 | 0.05  | -0.07 | -0.03 | -0.04 | -0.07 | -0.06 | 0.07  |
| 42 | 6 | 0.00  | -0.06 | -0.02 | 0.01  | 0.03  | -0.05 | -0.02 | -0.05 | 0.00  |
| 43 | 1 | 0.02  | 0.13  | -0.14 | 0.01  | 0.01  | -0.03 | 0.04  | 0.09  | -0.13 |
| 44 | 1 | -0.06 | -0.05 | 0.30  | 0.02  | 0.03  | -0.10 | -0.02 | -0.04 | 0.23  |
| 45 | 1 | 0.04  | 0.13  | -0.08 | 0.01  | 0.01  | -0.05 | 0.02  | 0.05  | 0.05  |
| 46 | 6 | -0.04 | -0.01 | -0.01 | -0.08 | -0.01 | -0.03 | -0.04 | -0.01 | -0.01 |
| 47 | 1 | -0.26 | 0.01  | 0.16  | -0.04 | 0.09  | -0.21 | -0.23 | 0.00  | 0.14  |
| 48 | 6 | 0.05  | 0.00  | -0.02 | 0.07  | -0.08 | 0.06  | 0.04  | 0.01  | 0.00  |
| 49 | 1 | 0.14  | -0.06 | 0.12  | 0.02  | -0.01 | -0.04 | 0.11  | -0.03 | 0.10  |
| 50 | 1 | -0.02 | 0.10  | 0.09  | 0.28  | -0.04 | 0.13  | 0.02  | 0.09  | 0.09  |
| 51 | 6 | -0.04 | 0.00  | 0.04  | 0.04  | 0.05  | -0.02 | -0.04 | 0.00  | 0.02  |
| 52 | 1 | -0.08 | 0.07  | 0.08  | -0.01 | 0.07  | -0.02 | -0.06 | 0.05  | 0.06  |
| 53 | 6 | 0.00  | 0.01  | 0.00  | 0.00  | 0.02  | -0.01 | 0.00  | 0.02  | 0.00  |
| 54 | 1 | 0.02  | 0.01  | -0.01 | -0.03 | 0.02  | -0.01 | 0.02  | 0.02  | 0.01  |
| 55 | 6 | 0.00  | 0.00  | 0.00  | -0.01 | 0.00  | -0.01 | 0.00  | 0.00  | -0.01 |
| 56 | 1 | 0.00  | -0.01 | 0.00  | -0.01 | -0.03 | 0.00  | 0.00  | -0.02 | 0.00  |
| 57 | 6 | 0.00  | -0.01 | 0.01  | 0.01  | -0.03 | 0.01  | 0.00  | -0.01 | 0.01  |
| 58 | 1 | 0.02  | -0.01 | 0.00  | 0.02  | -0.04 | 0.04  | 0.02  | -0.02 | 0.01  |
| 59 | 8 | 0.01  | -0.02 | 0.02  | 0.00  | -0.03 | 0.07  | 0.01  | 0.04  | -0.08 |
| 60 | 8 | 0.00  | 0.01  | 0.00  | 0.03  | -0.04 | 0.09  | 0.01  | 0.00  | 0.03  |
| 61 | 8 | 0.01  | 0.02  | -0.01 | 0.01  | 0.03  | -0.06 | 0.02  | 0.03  | -0.02 |
| 62 | 6 | 0.00  | 0.01  | 0.00  | -0.03 | -0.03 | -0.03 | -0.01 | 0.00  | -0.01 |
| 63 | 6 | 0.00  | 0.00  | 0.00  | 0.02  | 0.02  | 0.00  | 0.01  | 0.00  | 0.00  |
| 64 | 6 | 0.00  | 0.00  | 0.00  | 0.00  | 0.02  | 0.01  | 0.00  | 0.00  | 0.00  |
| 65 | 8 | 0.00  | 0.00  | 0.00  | 0.01  | 0.02  | -0.03 | 0.00  | 0.00  | -0.01 |
| 66 | 1 | 0.00  | -0.01 | 0.00  | 0.08  | 0.10  | 0.04  | 0.02  | 0.01  | 0.01  |
| 67 | 6 | 0.00  | 0.01  | 0.00  | -0.03 | -0.03 | 0.00  | 0.00  | 0.00  | 0.00  |
| 68 | 1 | 0.00  | -0.01 | 0.00  | 0.05  | 0.09  | 0.02  | 0.01  | 0.01  | 0.00  |
| 69 | 1 | 0.00  | 0.01  | 0.01  | 0.01  | -0.11 | -0.11 | 0.00  | -0.02 | -0.01 |
| 70 | 1 | 0.00  | 0.01  | 0.01  | 0.04  | -0.10 | -0.08 | 0.01  | 0.00  | 0.00  |
| 71 | 6 | 0.00  | 0.00  | 0.00  | 0.01  | 0.04  | 0.02  | 0.00  | 0.01  | 0.00  |
| 72 | 1 | -0.01 | 0.01  | 0.02  | 0.11  | -0.08 | -0.14 | 0.01  | -0.01 | 0.00  |
| 73 | 1 | 0.00  | 0.00  | 0.00  | -0.07 | -0.07 | 0.03  | -0.01 | -0.01 | 0.00  |
| 74 | 1 | 0.02  | 0.00  | -0.01 | -0.16 | -0.02 | 0.11  | -0.01 | 0.00  | 0.00  |

|                | 94       | 95       | 96       |
|----------------|----------|----------|----------|
|                | A        | A        | A        |
| Frequencies -- | 982.8653 | 993.1115 | 998.7131 |
| Red. masses -- | 2.1024   | 2.1495   | 2.6840   |
| Frc consts --  | 1.1966   | 1.2490   | 1.5773   |
| IR Inten --    | 23.0630  | 22.8186  | 27.5923  |
| Raman Activ -- | 4.4849   | 4.3633   | 6.2284   |
| Depolar (P) -- | 0.6742   | 0.3256   | 0.5353   |

| Depolar (U) -- |    |       |       | 0.8054 |       | 0.4912 |       |       | 0.6974 |       |  |
|----------------|----|-------|-------|--------|-------|--------|-------|-------|--------|-------|--|
| Atom           | AN | X     | Y     | Z      | X     | Y      | Z     | X     | Y      | Z     |  |
| 1              | 6  | 0.00  | 0.00  | -0.04  | -0.03 | 0.00   | 0.00  | -0.01 | -0.02  | 0.05  |  |
| 2              | 6  | 0.00  | -0.01 | 0.03   | 0.00  | 0.00   | -0.01 | 0.00  | 0.00   | -0.03 |  |
| 3              | 6  | -0.03 | 0.01  | 0.02   | 0.09  | -0.04  | -0.08 | 0.16  | -0.05  | -0.08 |  |
| 4              | 6  | -0.01 | -0.02 | 0.04   | -0.04 | 0.03   | -0.03 | -0.04 | 0.00   | -0.03 |  |
| 5              | 6  | 0.00  | -0.01 | 0.01   | 0.04  | -0.06  | -0.04 | -0.06 | 0.10   | 0.02  |  |
| 6              | 6  | 0.00  | -0.01 | -0.01  | 0.02  | 0.00   | 0.05  | 0.02  | 0.01   | -0.02 |  |
| 7              | 8  | -0.01 | -0.01 | 0.00   | 0.00  | 0.00   | 0.00  | 0.00  | 0.00   | 0.00  |  |
| 8              | 6  | -0.01 | -0.04 | 0.05   | 0.00  | 0.00   | 0.00  | 0.02  | 0.02   | -0.02 |  |
| 9              | 6  | -0.09 | 0.01  | 0.01   | 0.00  | 0.02   | -0.01 | 0.00  | 0.04   | -0.02 |  |
| 10             | 1  | -0.30 | 0.14  | 0.14   | -0.05 | 0.05   | 0.01  | -0.02 | 0.02   | -0.01 |  |
| 11             | 8  | -0.03 | -0.02 | 0.05   | 0.00  | -0.01  | 0.01  | -0.02 | -0.02  | 0.02  |  |
| 12             | 6  | 0.08  | 0.01  | -0.10  | 0.01  | -0.04  | -0.04 | 0.04  | -0.04  | -0.02 |  |
| 13             | 1  | 0.31  | 0.02  | -0.09  | 0.08  | -0.05  | -0.02 | 0.08  | -0.03  | -0.02 |  |
| 14             | 6  | 0.00  | 0.00  | 0.00   | -0.01 | 0.00   | -0.02 | 0.01  | 0.01   | 0.00  |  |
| 15             | 8  | 0.00  | 0.00  | 0.00   | 0.00  | 0.00   | 0.00  | 0.00  | 0.00   | 0.00  |  |
| 16             | 6  | -0.05 | -0.05 | 0.03   | 0.00  | 0.00   | 0.00  | 0.00  | 0.00   | -0.02 |  |
| 17             | 1  | -0.26 | 0.15  | -0.22  | 0.00  | -0.01  | -0.01 | 0.04  | 0.00   | 0.05  |  |
| 18             | 1  | 0.04  | 0.11  | -0.10  | 0.02  | -0.01  | 0.01  | -0.07 | 0.02   | -0.03 |  |
| 19             | 1  | 0.35  | 0.00  | 0.11   | 0.00  | 0.00   | 0.00  | -0.01 | 0.01   | 0.03  |  |
| 20             | 6  | -0.01 | 0.06  | 0.06   | 0.00  | 0.04   | 0.00  | -0.06 | 0.05   | 0.02  |  |
| 21             | 1  | -0.01 | 0.11  | 0.07   | 0.00  | 0.06   | 0.01  | -0.10 | 0.01   | 0.04  |  |
| 22             | 6  | 0.03  | -0.03 | -0.01  | -0.03 | -0.01  | 0.03  | -0.06 | 0.00   | 0.01  |  |
| 23             | 1  | 0.08  | -0.04 | 0.16   | -0.06 | 0.10   | -0.17 | -0.10 | 0.15   | -0.25 |  |
| 24             | 1  | -0.10 | 0.08  | -0.07  | 0.10  | -0.01  | 0.00  | 0.10  | 0.01   | -0.04 |  |
| 25             | 1  | -0.04 | 0.04  | 0.04   | 0.12  | -0.08  | 0.09  | 0.14  | -0.10  | 0.10  |  |
| 26             | 6  | 0.03  | 0.02  | -0.01  | -0.04 | -0.02  | -0.03 | -0.07 | -0.06  | -0.05 |  |
| 27             | 1  | 0.03  | -0.02 | 0.01   | -0.10 | -0.07  | 0.03  | -0.11 | -0.19  | 0.03  |  |
| 28             | 1  | 0.01  | 0.06  | 0.00   | 0.07  | 0.00   | 0.04  | 0.06  | 0.03   | 0.06  |  |
| 29             | 6  | 0.10  | 0.06  | -0.11  | 0.00  | -0.01  | 0.00  | 0.04  | -0.02  | 0.01  |  |
| 30             | 1  | -0.05 | -0.12 | -0.04  | 0.00  | 0.00   | 0.00  | -0.06 | -0.14  | 0.06  |  |
| 31             | 1  | -0.04 | 0.33  | -0.19  | -0.01 | 0.00   | 0.02  | -0.05 | 0.16   | -0.07 |  |
| 32             | 6  | 0.02  | 0.00  | -0.06  | 0.00  | 0.00   | -0.01 | 0.00  | -0.01  | 0.00  |  |
| 33             | 1  | 0.06  | 0.01  | -0.02  | 0.00  | -0.02  | -0.01 | -0.02 | -0.05  | -0.02 |  |
| 34             | 6  | 0.00  | 0.02  | 0.00   | 0.00  | 0.00   | 0.00  | 0.00  | -0.01  | 0.01  |  |
| 35             | 1  | -0.02 | -0.07 | 0.08   | -0.01 | 0.00   | 0.00  | -0.02 | 0.04   | -0.03 |  |
| 36             | 6  | -0.02 | -0.03 | -0.02  | -0.04 | 0.05   | 0.05  | -0.03 | 0.00   | 0.04  |  |
| 37             | 1  | 0.02  | 0.04  | -0.11  | 0.18  | -0.06  | 0.35  | 0.10  | 0.01   | 0.10  |  |
| 38             | 1  | 0.08  | 0.01  | 0.16   | 0.10  | -0.09  | -0.07 | 0.11  | -0.03  | 0.12  |  |
| 39             | 1  | -0.01 | 0.06  | -0.10  | -0.02 | -0.07  | -0.27 | 0.00  | 0.01   | -0.18 |  |
| 40             | 6  | -0.02 | -0.01 | 0.01   | 0.02  | 0.05   | 0.02  | 0.04  | 0.06   | 0.05  |  |
| 41             | 1  | -0.01 | 0.01  | 0.00   | -0.03 | -0.01  | 0.06  | -0.02 | -0.02  | 0.11  |  |
| 42             | 6  | -0.01 | -0.01 | 0.00   | 0.04  | 0.04   | -0.01 | 0.04  | 0.00   | 0.03  |  |
| 43             | 1  | 0.01  | 0.02  | -0.03  | -0.06 | -0.10  | 0.17  | -0.10 | -0.06  | 0.19  |  |
| 44             | 1  | 0.00  | -0.01 | 0.04   | -0.02 | 0.03   | -0.20 | -0.09 | -0.01  | -0.03 |  |
| 45             | 1  | 0.00  | 0.00  | 0.02   | -0.02 | -0.03  | -0.14 | -0.02 | 0.03   | -0.18 |  |
| 46             | 6  | -0.01 | 0.00  | 0.00   | 0.08  | -0.04  | 0.11  | -0.06 | 0.09   | -0.11 |  |
| 47             | 1  | -0.06 | 0.01  | 0.02   | 0.19  | -0.17  | 0.21  | -0.36 | 0.21   | -0.04 |  |
| 48             | 6  | 0.01  | 0.00  | 0.00   | -0.05 | 0.02   | -0.11 | 0.08  | -0.06  | 0.06  |  |
| 49             | 1  | 0.03  | -0.01 | 0.02   | -0.15 | -0.29  | -0.09 | 0.26  | 0.19   | 0.17  |  |
| 50             | 1  | 0.01  | 0.03  | 0.03   | -0.32 | 0.09   | -0.06 | 0.17  | -0.11  | 0.01  |  |



|    |   |       |       |       |       |       |       |       |       |       |
|----|---|-------|-------|-------|-------|-------|-------|-------|-------|-------|
| 51 | 6 | -0.01 | 0.00  | 0.01  | -0.03 | -0.02 | 0.05  | 0.00  | 0.05  | 0.00  |
| 52 | 1 | -0.02 | 0.02  | 0.02  | -0.08 | 0.08  | 0.12  | 0.05  | -0.05 | -0.07 |
| 53 | 6 | 0.00  | 0.01  | 0.00  | 0.00  | -0.03 | 0.00  | 0.00  | 0.00  | 0.00  |
| 54 | 1 | 0.01  | 0.01  | 0.01  | -0.01 | -0.04 | -0.02 | -0.03 | -0.01 | -0.04 |
| 55 | 6 | 0.00  | 0.00  | 0.00  | 0.01  | 0.01  | 0.01  | 0.00  | 0.00  | 0.00  |
| 56 | 1 | 0.00  | -0.01 | 0.00  | 0.00  | 0.04  | 0.00  | 0.00  | -0.01 | 0.00  |
| 57 | 6 | 0.00  | -0.01 | 0.00  | -0.01 | 0.04  | -0.01 | 0.00  | -0.02 | 0.01  |
| 58 | 1 | 0.01  | -0.01 | 0.01  | -0.05 | 0.05  | -0.06 | 0.02  | -0.02 | 0.02  |
| 59 | 8 | 0.01  | 0.01  | -0.02 | -0.01 | -0.02 | 0.02  | -0.02 | -0.01 | 0.00  |
| 60 | 8 | 0.02  | -0.03 | 0.07  | 0.01  | -0.01 | 0.04  | 0.00  | 0.01  | 0.00  |
| 61 | 8 | 0.01  | 0.01  | -0.01 | 0.00  | 0.05  | -0.02 | -0.01 | -0.08 | 0.04  |
| 62 | 6 | -0.02 | -0.02 | -0.02 | -0.02 | -0.02 | -0.01 | 0.00  | -0.01 | 0.00  |
| 63 | 6 | 0.01  | 0.00  | -0.01 | 0.01  | 0.00  | -0.01 | 0.00  | 0.00  | 0.00  |
| 64 | 6 | 0.00  | 0.01  | 0.00  | 0.01  | 0.01  | 0.00  | 0.00  | 0.00  | 0.00  |
| 65 | 8 | 0.01  | 0.01  | -0.01 | 0.01  | 0.01  | -0.01 | 0.00  | 0.00  | 0.00  |
| 66 | 1 | 0.05  | 0.06  | 0.02  | 0.04  | 0.07  | 0.00  | -0.01 | -0.02 | 0.00  |
| 67 | 6 | -0.01 | -0.01 | 0.00  | -0.01 | -0.01 | 0.01  | 0.00  | 0.00  | 0.00  |
| 68 | 1 | 0.02  | 0.06  | 0.01  | 0.02  | 0.06  | 0.01  | 0.00  | -0.01 | 0.00  |
| 69 | 1 | 0.01  | -0.04 | -0.05 | 0.01  | -0.04 | -0.05 | 0.00  | 0.01  | 0.01  |
| 70 | 1 | 0.02  | -0.05 | -0.04 | 0.02  | -0.05 | -0.04 | 0.00  | 0.01  | 0.01  |
| 71 | 6 | 0.00  | 0.02  | 0.01  | -0.01 | 0.02  | 0.01  | 0.00  | 0.01  | 0.00  |
| 72 | 1 | 0.05  | -0.03 | -0.06 | 0.03  | -0.03 | -0.02 | 0.02  | -0.01 | -0.02 |
| 73 | 1 | -0.05 | -0.03 | 0.02  | -0.02 | -0.03 | 0.01  | 0.00  | -0.01 | 0.00  |
| 74 | 1 | -0.07 | -0.01 | 0.04  | -0.05 | 0.00  | 0.05  | -0.02 | 0.00  | 0.01  |

97

98

99

A

A

A

|                |           |           |           |
|----------------|-----------|-----------|-----------|
| Frequencies -- | 1009.8140 | 1015.3161 | 1020.7406 |
| Red. masses -- | 2.6193    | 2.3485    | 2.0111    |
| Frc consts --  | 1.5737    | 1.4264    | 1.2346    |
| IR Inten --    | 6.3114    | 43.5319   | 6.3182    |
| Raman Activ -- | 13.7312   | 8.8798    | 4.1772    |
| Depolar (P) -- | 0.7270    | 0.4776    | 0.0994    |
| Depolar (U) -- | 0.8420    | 0.6465    | 0.1809    |

| Atom | AN | X     | Y     | Z     | X     | Y     | Z     | X     | Y     | Z     |
|------|----|-------|-------|-------|-------|-------|-------|-------|-------|-------|
| 1    | 6  | 0.01  | -0.01 | 0.01  | -0.04 | 0.02  | -0.04 | 0.00  | -0.01 | 0.02  |
| 2    | 6  | 0.00  | 0.00  | 0.00  | 0.01  | -0.01 | 0.05  | 0.00  | 0.00  | 0.01  |
| 3    | 6  | 0.00  | 0.03  | 0.02  | 0.05  | -0.02 | 0.01  | 0.00  | 0.03  | 0.05  |
| 4    | 6  | 0.00  | -0.01 | -0.04 | 0.01  | 0.00  | 0.04  | -0.01 | -0.02 | -0.07 |
| 5    | 6  | -0.03 | 0.00  | -0.02 | 0.01  | 0.02  | 0.00  | -0.04 | 0.00  | -0.01 |
| 6    | 6  | 0.01  | 0.00  | 0.00  | -0.01 | 0.01  | 0.00  | 0.00  | -0.01 | -0.01 |
| 7    | 8  | 0.00  | 0.00  | 0.00  | -0.01 | 0.00  | -0.01 | 0.00  | 0.01  | 0.00  |
| 8    | 6  | 0.01  | 0.01  | -0.01 | -0.03 | -0.05 | 0.03  | 0.00  | -0.01 | 0.00  |
| 9    | 6  | 0.01  | 0.00  | 0.00  | 0.05  | 0.09  | -0.06 | 0.06  | 0.02  | -0.01 |
| 10   | 1  | 0.02  | -0.02 | 0.00  | 0.02  | 0.00  | -0.05 | 0.07  | -0.06 | -0.02 |
| 11   | 8  | 0.00  | 0.00  | 0.00  | -0.04 | -0.05 | 0.10  | -0.02 | -0.01 | 0.03  |
| 12   | 6  | 0.00  | 0.01  | 0.00  | -0.03 | 0.00  | 0.06  | -0.03 | 0.04  | -0.01 |
| 13   | 1  | -0.04 | -0.01 | 0.01  | -0.08 | 0.01  | 0.04  | -0.17 | 0.01  | 0.00  |
| 14   | 6  | 0.00  | -0.05 | 0.02  | 0.00  | 0.00  | 0.01  | 0.01  | 0.01  | 0.00  |
| 15   | 8  | 0.00  | 0.03  | 0.00  | 0.00  | 0.00  | 0.00  | 0.00  | -0.01 | 0.00  |
| 16   | 6  | 0.00  | 0.00  | -0.01 | -0.04 | 0.00  | 0.06  | -0.01 | 0.00  | 0.01  |
| 17   | 1  | 0.03  | 0.00  | 0.03  | -0.23 | 0.01  | -0.23 | -0.02 | 0.00  | -0.03 |
| 18   | 1  | -0.03 | 0.00  | -0.01 | 0.24  | -0.02 | 0.06  | 0.03  | -0.01 | 0.01  |

|    |   |       |       |       |       |       |       |       |       |       |
|----|---|-------|-------|-------|-------|-------|-------|-------|-------|-------|
| 19 | 1 | -0.02 | 0.00  | 0.01  | 0.13  | -0.04 | -0.07 | 0.00  | 0.00  | -0.02 |
| 20 | 6 | -0.02 | -0.01 | 0.00  | 0.15  | 0.03  | -0.07 | 0.01  | -0.02 | -0.04 |
| 21 | 1 | -0.03 | -0.03 | 0.01  | 0.23  | 0.05  | -0.14 | 0.01  | -0.04 | -0.04 |
| 22 | 6 | 0.00  | 0.00  | -0.01 | -0.04 | -0.05 | 0.04  | -0.01 | -0.01 | -0.01 |
| 23 | 1 | 0.01  | -0.01 | 0.03  | 0.00  | 0.16  | -0.12 | 0.02  | 0.02  | 0.02  |
| 24 | 1 | -0.03 | 0.02  | -0.02 | 0.05  | 0.10  | -0.12 | -0.04 | 0.05  | -0.06 |
| 25 | 1 | -0.02 | 0.02  | 0.00  | 0.21  | -0.12 | 0.24  | 0.02  | 0.00  | 0.05  |
| 26 | 6 | -0.02 | 0.01  | -0.01 | -0.02 | 0.00  | 0.02  | -0.02 | 0.02  | 0.00  |
| 27 | 1 | -0.06 | 0.03  | 0.00  | -0.03 | 0.07  | -0.02 | -0.06 | 0.07  | 0.00  |
| 28 | 1 | -0.03 | 0.05  | 0.01  | -0.03 | -0.06 | -0.01 | -0.05 | 0.07  | 0.00  |
| 29 | 6 | 0.01  | 0.00  | 0.01  | -0.05 | -0.02 | -0.11 | 0.00  | -0.01 | -0.02 |
| 30 | 1 | -0.02 | -0.04 | 0.02  | 0.11  | 0.31  | -0.14 | -0.01 | 0.03  | 0.00  |
| 31 | 1 | -0.01 | 0.04  | -0.03 | 0.06  | -0.18 | 0.23  | 0.00  | 0.00  | 0.01  |
| 32 | 6 | 0.00  | 0.00  | 0.01  | 0.01  | 0.00  | 0.00  | 0.00  | -0.01 | 0.02  |
| 33 | 1 | -0.01 | -0.01 | 0.00  | -0.06 | 0.19  | -0.01 | -0.08 | 0.08  | -0.03 |
| 34 | 6 | 0.00  | 0.00  | 0.00  | -0.02 | 0.03  | -0.03 | -0.01 | 0.01  | -0.02 |
| 35 | 1 | 0.00  | 0.01  | -0.01 | 0.20  | -0.14 | 0.13  | 0.12  | -0.05 | 0.04  |
| 36 | 6 | 0.02  | 0.00  | 0.02  | -0.02 | 0.01  | -0.02 | 0.03  | -0.02 | 0.03  |
| 37 | 1 | -0.02 | 0.00  | -0.01 | 0.03  | 0.00  | 0.03  | -0.04 | 0.01  | -0.05 |
| 38 | 1 | -0.02 | 0.01  | 0.00  | 0.02  | -0.01 | -0.03 | -0.03 | 0.02  | 0.05  |
| 39 | 1 | 0.01  | 0.00  | 0.09  | -0.01 | -0.01 | -0.10 | 0.02  | 0.01  | 0.13  |
| 40 | 6 | 0.02  | -0.02 | 0.00  | 0.02  | -0.01 | -0.02 | 0.02  | -0.03 | 0.01  |
| 41 | 1 | 0.06  | 0.02  | -0.03 | 0.01  | -0.06 | 0.03  | 0.06  | 0.01  | -0.02 |
| 42 | 6 | 0.05  | -0.01 | 0.02  | -0.01 | -0.01 | -0.01 | 0.01  | -0.02 | 0.00  |
| 43 | 1 | -0.11 | -0.04 | 0.19  | 0.02  | 0.04  | -0.06 | -0.03 | 0.02  | 0.02  |
| 44 | 1 | -0.11 | -0.02 | 0.01  | 0.00  | -0.01 | 0.07  | -0.04 | -0.01 | 0.07  |
| 45 | 1 | -0.01 | 0.06  | -0.25 | 0.01  | 0.03  | 0.03  | 0.01  | 0.04  | -0.07 |
| 46 | 6 | 0.06  | 0.02  | 0.06  | 0.02  | 0.01  | -0.01 | -0.02 | 0.02  | -0.01 |
| 47 | 1 | 0.09  | -0.01 | 0.07  | 0.02  | 0.03  | -0.04 | -0.10 | 0.02  | 0.05  |
| 48 | 6 | 0.00  | -0.01 | -0.04 | -0.02 | -0.02 | 0.02  | 0.03  | -0.01 | -0.01 |
| 49 | 1 | 0.02  | -0.05 | 0.01  | -0.02 | 0.09  | -0.02 | 0.05  | -0.05 | 0.04  |
| 50 | 1 | -0.05 | 0.05  | 0.02  | 0.05  | -0.07 | -0.04 | -0.03 | 0.02  | 0.01  |
| 51 | 6 | -0.13 | 0.01  | -0.08 | 0.00  | 0.02  | -0.03 | 0.00  | 0.00  | 0.03  |
| 52 | 1 | -0.18 | 0.00  | -0.11 | 0.01  | -0.03 | -0.07 | 0.01  | 0.03  | 0.05  |
| 53 | 6 | 0.05  | 0.22  | 0.01  | 0.01  | 0.03  | 0.00  | -0.01 | -0.02 | 0.00  |
| 54 | 1 | 0.38  | 0.35  | 0.31  | 0.04  | 0.04  | 0.03  | -0.07 | -0.05 | -0.07 |
| 55 | 6 | -0.06 | -0.04 | -0.05 | -0.01 | -0.01 | -0.01 | 0.01  | 0.01  | 0.01  |
| 56 | 1 | -0.02 | -0.19 | 0.01  | 0.00  | -0.02 | 0.00  | 0.01  | 0.02  | 0.00  |
| 57 | 6 | 0.01  | -0.19 | 0.04  | 0.00  | -0.03 | 0.00  | 0.00  | 0.02  | 0.00  |
| 58 | 1 | 0.25  | -0.26 | 0.28  | 0.04  | -0.04 | 0.05  | -0.04 | 0.03  | -0.06 |
| 59 | 8 | 0.00  | 0.00  | 0.00  | -0.01 | 0.00  | 0.00  | 0.00  | 0.00  | -0.02 |
| 60 | 8 | 0.00  | 0.00  | 0.00  | 0.00  | 0.02  | -0.03 | 0.01  | 0.03  | 0.00  |
| 61 | 8 | 0.00  | 0.01  | -0.01 | -0.01 | -0.01 | 0.01  | 0.01  | -0.01 | 0.01  |
| 62 | 6 | 0.00  | -0.01 | 0.00  | 0.01  | -0.01 | 0.01  | -0.03 | -0.05 | 0.02  |
| 63 | 6 | 0.00  | 0.00  | -0.01 | -0.01 | 0.01  | 0.02  | 0.05  | -0.04 | -0.12 |
| 64 | 6 | 0.00  | 0.00  | 0.00  | -0.01 | -0.01 | 0.01  | 0.05  | 0.04  | -0.07 |
| 65 | 8 | 0.00  | 0.00  | 0.00  | 0.00  | -0.01 | 0.00  | 0.00  | 0.01  | 0.03  |
| 66 | 1 | 0.02  | 0.03  | 0.00  | -0.06 | -0.07 | 0.00  | 0.29  | 0.41  | -0.02 |
| 67 | 6 | 0.00  | 0.00  | 0.00  | 0.01  | 0.01  | -0.01 | -0.04 | -0.04 | 0.07  |
| 68 | 1 | 0.01  | 0.03  | 0.00  | -0.02 | -0.06 | -0.01 | 0.10  | 0.39  | 0.05  |
| 69 | 1 | 0.00  | -0.01 | -0.02 | -0.01 | 0.01  | 0.04  | 0.06  | -0.04 | -0.24 |
| 70 | 1 | 0.01  | -0.02 | -0.02 | -0.01 | 0.05  | 0.04  | 0.06  | -0.31 | -0.26 |

|                |    |           |       |       |           |       |       |           |       |       |
|----------------|----|-----------|-------|-------|-----------|-------|-------|-----------|-------|-------|
| 71             | 6  | 0.00      | 0.00  | 0.01  | 0.01      | 0.01  | -0.02 | -0.07     | -0.01 | 0.10  |
| 72             | 1  | 0.00      | -0.01 | -0.01 | 0.03      | -0.02 | -0.02 | -0.13     | 0.06  | 0.11  |
| 73             | 1  | -0.01     | -0.01 | 0.01  | 0.03      | -0.02 | -0.04 | -0.13     | 0.06  | 0.14  |
| 74             | 1  | -0.02     | 0.00  | 0.02  | -0.01     | 0.00  | 0.03  | -0.02     | 0.01  | 0.00  |
|                |    | 100       |       |       | 101       |       |       | 102       |       |       |
|                |    | A         |       |       | A         |       |       | A         |       |       |
| Frequencies -- |    | 1024.8858 |       |       | 1027.2885 |       |       | 1028.6798 |       |       |
| Red. masses -- |    | 2.1903    |       |       | 1.6535    |       |       | 1.9066    |       |       |
| Frc consts --  |    | 1.3555    |       |       | 1.0281    |       |       | 1.1887    |       |       |
| IR Inten --    |    | 14.1758   |       |       | 30.2585   |       |       | 48.7095   |       |       |
| Raman Activ -- |    | 11.1627   |       |       | 3.8663    |       |       | 7.4719    |       |       |
| Depolar (P) -- |    | 0.6293    |       |       | 0.7235    |       |       | 0.7496    |       |       |
| Depolar (U) -- |    | 0.7725    |       |       | 0.8395    |       |       | 0.8569    |       |       |
| Atom           | AN | X         | Y     | Z     | X         | Y     | Z     | X         | Y     | Z     |
| 1              | 6  | -0.03     | 0.02  | -0.05 | 0.01      | 0.00  | 0.01  | 0.01      | 0.00  | 0.01  |
| 2              | 6  | 0.00      | 0.00  | 0.00  | 0.00      | 0.00  | 0.00  | -0.01     | 0.01  | 0.01  |
| 3              | 6  | 0.02      | -0.08 | -0.04 | -0.02     | -0.03 | 0.02  | -0.02     | -0.04 | 0.03  |
| 4              | 6  | 0.00      | 0.00  | 0.09  | 0.00      | 0.00  | -0.04 | 0.00      | 0.00  | -0.03 |
| 5              | 6  | 0.08      | 0.02  | 0.03  | -0.02     | 0.00  | -0.01 | -0.02     | 0.00  | -0.01 |
| 6              | 6  | 0.00      | 0.03  | -0.01 | 0.01      | -0.01 | 0.00  | 0.01      | -0.01 | 0.00  |
| 7              | 8  | 0.00      | 0.00  | 0.00  | 0.00      | 0.00  | 0.00  | 0.01      | 0.00  | 0.00  |
| 8              | 6  | -0.01     | -0.01 | 0.01  | 0.01      | -0.01 | 0.00  | 0.00      | -0.01 | 0.02  |
| 9              | 6  | -0.05     | -0.06 | 0.04  | 0.01      | 0.01  | 0.00  | 0.04      | 0.03  | -0.03 |
| 10             | 1  | -0.05     | 0.02  | 0.05  | 0.01      | 0.01  | 0.00  | 0.04      | -0.05 | -0.04 |
| 11             | 8  | 0.04      | 0.03  | -0.04 | 0.00      | 0.00  | 0.01  | -0.03     | -0.02 | 0.04  |
| 12             | 6  | -0.01     | 0.00  | -0.02 | 0.00      | 0.01  | 0.00  | -0.01     | 0.01  | 0.03  |
| 13             | 1  | 0.11      | 0.05  | -0.06 | -0.03     | -0.01 | 0.02  | -0.09     | 0.00  | 0.03  |
| 14             | 6  | -0.03     | -0.01 | 0.00  | -0.02     | -0.01 | -0.01 | -0.02     | -0.01 | -0.01 |
| 15             | 8  | 0.00      | 0.02  | 0.00  | -0.01     | 0.01  | -0.01 | -0.01     | 0.02  | -0.01 |
| 16             | 6  | 0.00      | 0.00  | 0.00  | 0.00      | 0.00  | -0.01 | -0.01     | 0.00  | 0.02  |
| 17             | 1  | 0.00      | -0.01 | 0.00  | 0.01      | 0.00  | 0.01  | -0.06     | 0.01  | -0.06 |
| 18             | 1  | 0.02      | -0.01 | 0.01  | -0.03     | 0.00  | -0.01 | 0.08      | -0.01 | 0.02  |
| 19             | 1  | -0.01     | 0.00  | -0.01 | -0.02     | 0.00  | 0.00  | 0.03      | -0.01 | -0.03 |
| 20             | 6  | 0.03      | 0.01  | 0.00  | -0.01     | -0.02 | 0.01  | 0.04      | 0.00  | -0.02 |
| 21             | 1  | 0.08      | 0.11  | -0.01 | -0.01     | -0.03 | 0.00  | 0.05      | -0.05 | -0.04 |
| 22             | 6  | 0.01      | 0.02  | 0.05  | 0.01      | 0.02  | -0.01 | -0.01     | 0.00  | -0.01 |
| 23             | 1  | -0.06     | -0.01 | -0.10 | -0.01     | -0.06 | 0.03  | 0.00      | 0.01  | -0.01 |
| 24             | 1  | 0.12      | -0.12 | 0.14  | 0.00      | -0.05 | 0.06  | -0.01     | 0.02  | -0.03 |
| 25             | 1  | 0.00      | -0.03 | -0.06 | -0.07     | 0.04  | -0.09 | 0.01      | -0.01 | 0.02  |
| 26             | 6  | 0.04      | -0.07 | 0.00  | 0.04      | -0.02 | -0.01 | 0.04      | -0.02 | -0.01 |
| 27             | 1  | 0.17      | -0.21 | 0.00  | 0.09      | -0.14 | 0.02  | 0.09      | -0.11 | 0.01  |
| 28             | 1  | 0.07      | -0.11 | 0.00  | 0.04      | 0.03  | 0.01  | 0.03      | 0.01  | 0.01  |
| 29             | 6  | -0.04     | 0.02  | 0.02  | 0.00      | 0.00  | 0.00  | 0.01      | -0.01 | -0.04 |
| 30             | 1  | 0.05      | 0.06  | -0.04 | 0.00      | 0.02  | 0.00  | 0.01      | 0.04  | -0.02 |
| 31             | 1  | 0.04      | -0.14 | 0.05  | 0.00      | 0.02  | 0.01  | 0.01      | 0.00  | 0.01  |
| 32             | 6  | 0.01      | 0.00  | -0.01 | 0.07      | -0.05 | 0.05  | -0.08     | 0.05  | -0.04 |
| 33             | 1  | 0.00      | 0.00  | -0.02 | -0.39     | 0.31  | -0.26 | 0.40      | -0.26 | 0.28  |
| 34             | 6  | -0.01     | 0.01  | 0.01  | -0.06     | 0.05  | -0.04 | 0.07      | -0.05 | 0.03  |
| 35             | 1  | -0.01     | -0.03 | 0.04  | 0.42      | -0.26 | 0.25  | -0.39     | 0.24  | -0.25 |
| 36             | 6  | -0.05     | 0.01  | -0.04 | 0.01      | 0.00  | 0.02  | 0.01      | 0.00  | 0.01  |
| 37             | 1  | 0.07      | 0.00  | 0.06  | -0.01     | -0.01 | 0.02  | -0.02     | -0.01 | 0.01  |
| 38             | 1  | 0.07      | -0.03 | 0.00  | -0.01     | 0.00  | -0.01 | -0.02     | 0.00  | -0.01 |

|    |   |       |       |       |       |       |       |       |       |       |
|----|---|-------|-------|-------|-------|-------|-------|-------|-------|-------|
| 39 | 1 | -0.03 | 0.01  | -0.22 | 0.01  | -0.01 | 0.06  | 0.01  | -0.01 | 0.06  |
| 40 | 6 | -0.06 | 0.06  | 0.00  | -0.06 | 0.03  | 0.02  | -0.06 | 0.03  | 0.01  |
| 41 | 1 | -0.14 | -0.02 | 0.06  | -0.10 | 0.02  | 0.02  | -0.10 | 0.01  | 0.02  |
| 42 | 6 | -0.04 | 0.03  | 0.02  | 0.01  | 0.04  | 0.02  | 0.01  | 0.05  | 0.01  |
| 43 | 1 | 0.05  | -0.06 | -0.02 | -0.03 | -0.11 | 0.15  | -0.02 | -0.11 | 0.14  |
| 44 | 1 | 0.09  | 0.03  | -0.14 | 0.01  | 0.03  | -0.22 | 0.02  | 0.03  | -0.23 |
| 45 | 1 | -0.03 | -0.11 | 0.19  | -0.03 | -0.09 | -0.02 | -0.03 | -0.10 | 0.01  |
| 46 | 6 | 0.01  | -0.01 | -0.04 | -0.05 | -0.01 | -0.01 | -0.06 | -0.02 | -0.01 |
| 47 | 1 | -0.02 | -0.03 | 0.00  | -0.08 | -0.02 | 0.04  | -0.08 | -0.03 | 0.03  |
| 48 | 6 | -0.04 | 0.04  | 0.05  | 0.05  | 0.07  | 0.00  | 0.05  | 0.09  | 0.00  |
| 49 | 1 | 0.01  | 0.23  | 0.03  | 0.12  | -0.02 | 0.12  | 0.14  | 0.00  | 0.14  |
| 50 | 1 | 0.08  | -0.05 | -0.04 | 0.00  | 0.17  | 0.11  | 0.02  | 0.20  | 0.13  |
| 51 | 6 | 0.02  | -0.02 | -0.06 | 0.00  | -0.10 | 0.00  | 0.00  | -0.12 | -0.01 |
| 52 | 1 | 0.05  | -0.13 | -0.14 | -0.01 | -0.04 | 0.05  | 0.00  | -0.06 | 0.04  |
| 53 | 6 | 0.01  | 0.03  | 0.00  | 0.00  | -0.01 | 0.00  | 0.00  | -0.01 | 0.00  |
| 54 | 1 | 0.15  | 0.09  | 0.15  | 0.09  | 0.03  | 0.09  | 0.12  | 0.04  | 0.12  |
| 55 | 6 | -0.02 | -0.03 | -0.01 | 0.00  | -0.02 | 0.00  | -0.01 | -0.03 | 0.00  |
| 56 | 1 | -0.02 | -0.04 | -0.01 | 0.00  | -0.02 | 0.00  | -0.01 | -0.03 | 0.00  |
| 57 | 6 | 0.01  | -0.02 | 0.01  | 0.01  | 0.03  | 0.00  | 0.01  | 0.04  | 0.01  |
| 58 | 1 | 0.08  | -0.04 | 0.11  | 0.02  | 0.03  | 0.02  | 0.03  | 0.03  | 0.04  |
| 59 | 8 | 0.00  | 0.01  | 0.00  | 0.01  | 0.01  | -0.02 | 0.01  | 0.01  | -0.02 |
| 60 | 8 | 0.00  | 0.00  | 0.00  | 0.00  | 0.01  | 0.00  | 0.00  | 0.02  | -0.02 |
| 61 | 8 | -0.01 | 0.00  | 0.01  | 0.01  | 0.01  | 0.00  | 0.01  | 0.01  | 0.00  |
| 62 | 6 | 0.00  | 0.04  | 0.01  | 0.00  | -0.03 | 0.00  | -0.01 | -0.04 | 0.01  |
| 63 | 6 | 0.02  | -0.01 | -0.07 | 0.00  | 0.00  | 0.02  | 0.01  | -0.01 | 0.00  |
| 64 | 6 | 0.03  | 0.03  | -0.04 | -0.01 | -0.01 | 0.01  | 0.00  | -0.01 | 0.00  |
| 65 | 8 | 0.00  | 0.00  | 0.02  | 0.00  | 0.00  | -0.01 | 0.00  | 0.00  | 0.00  |
| 66 | 1 | 0.19  | 0.18  | 0.03  | -0.07 | -0.04 | -0.02 | -0.02 | 0.02  | -0.02 |
| 67 | 6 | -0.02 | -0.03 | 0.03  | 0.00  | 0.01  | -0.01 | 0.00  | 0.00  | 0.00  |
| 68 | 1 | 0.03  | 0.16  | 0.01  | 0.00  | -0.04 | 0.00  | 0.01  | 0.03  | 0.01  |
| 69 | 1 | 0.03  | 0.00  | -0.11 | -0.01 | -0.01 | 0.03  | 0.00  | -0.01 | -0.01 |
| 70 | 1 | 0.01  | -0.16 | -0.13 | 0.00  | 0.05  | 0.04  | 0.01  | 0.00  | 0.00  |
| 71 | 6 | -0.03 | -0.05 | 0.06  | 0.01  | 0.03  | -0.02 | -0.01 | 0.02  | -0.01 |
| 72 | 1 | -0.17 | 0.12  | 0.12  | 0.07  | -0.06 | -0.04 | 0.05  | -0.05 | -0.02 |
| 73 | 1 | -0.11 | 0.13  | 0.13  | 0.04  | -0.07 | -0.05 | 0.03  | -0.06 | -0.04 |
| 74 | 1 | 0.14  | 0.01  | -0.18 | -0.07 | -0.01 | 0.10  | -0.08 | 0.00  | 0.11  |

103

104

105

A

A

A

|                |           |           |           |
|----------------|-----------|-----------|-----------|
| Frequencies -- | 1042.2788 | 1044.7341 | 1048.8530 |
| Red. masses -- | 2.7726    | 2.4358    | 1.9348    |
| Frc consts --  | 1.7746    | 1.5664    | 1.2540    |
| IR Inten --    | 72.6715   | 62.2356   | 37.6705   |
| Raman Activ -- | 2.7214    | 12.9459   | 1.8533    |
| Depolar (P) -- | 0.2022    | 0.1833    | 0.3832    |
| Depolar (U) -- | 0.3364    | 0.3098    | 0.5541    |

| Atom | AN | X     | Y     | Z     | X     | Y     | Z     | X     | Y     | Z     |
|------|----|-------|-------|-------|-------|-------|-------|-------|-------|-------|
| 1    | 6  | 0.09  | -0.04 | 0.08  | -0.04 | 0.02  | -0.03 | 0.04  | -0.01 | 0.03  |
| 2    | 6  | -0.02 | 0.01  | -0.04 | 0.02  | -0.01 | 0.02  | -0.02 | 0.01  | 0.00  |
| 3    | 6  | -0.03 | 0.07  | -0.09 | 0.08  | 0.04  | 0.03  | -0.04 | -0.02 | -0.02 |
| 4    | 6  | -0.01 | 0.02  | 0.03  | 0.01  | 0.00  | 0.00  | 0.02  | 0.01  | 0.03  |
| 5    | 6  | 0.08  | -0.03 | 0.05  | -0.07 | 0.02  | -0.03 | -0.04 | 0.02  | -0.01 |
| 6    | 6  | 0.00  | 0.01  | 0.03  | 0.00  | -0.02 | 0.04  | 0.00  | -0.02 | 0.00  |

|    |   |       |       |       |       |       |       |       |       |       |
|----|---|-------|-------|-------|-------|-------|-------|-------|-------|-------|
| 7  | 8 | 0.00  | 0.00  | 0.01  | -0.01 | 0.00  | 0.00  | 0.00  | 0.00  | 0.00  |
| 8  | 6 | 0.00  | 0.03  | -0.03 | -0.01 | 0.00  | 0.00  | 0.00  | 0.00  | 0.00  |
| 9  | 6 | 0.06  | 0.10  | -0.07 | -0.06 | -0.06 | 0.05  | 0.02  | 0.07  | -0.06 |
| 10 | 1 | 0.08  | 0.02  | -0.09 | -0.07 | 0.00  | 0.06  | 0.05  | 0.00  | -0.07 |
| 11 | 8 | -0.05 | -0.04 | 0.06  | 0.03  | 0.02  | -0.05 | -0.03 | -0.03 | 0.05  |
| 12 | 6 | 0.01  | -0.07 | 0.03  | 0.00  | 0.01  | -0.02 | 0.01  | -0.04 | 0.06  |
| 13 | 1 | -0.07 | -0.08 | 0.03  | 0.12  | 0.04  | -0.03 | 0.00  | -0.01 | 0.03  |
| 14 | 6 | -0.04 | 0.00  | -0.01 | -0.02 | 0.00  | -0.02 | 0.01  | 0.00  | 0.01  |
| 15 | 8 | -0.01 | 0.06  | -0.02 | -0.02 | 0.03  | -0.02 | 0.01  | -0.03 | 0.01  |
| 16 | 6 | 0.01  | -0.01 | 0.00  | 0.00  | -0.01 | 0.00  | 0.00  | 0.00  | 0.00  |
| 17 | 1 | 0.00  | 0.02  | 0.00  | 0.01  | 0.00  | 0.01  | -0.02 | 0.01  | -0.01 |
| 18 | 1 | 0.00  | 0.02  | -0.02 | -0.02 | 0.00  | -0.01 | 0.01  | 0.00  | 0.00  |
| 19 | 1 | 0.04  | 0.00  | 0.03  | 0.01  | 0.00  | 0.01  | 0.01  | 0.00  | 0.00  |
| 20 | 6 | -0.07 | -0.01 | 0.03  | 0.03  | 0.04  | -0.02 | -0.01 | 0.00  | 0.02  |
| 21 | 1 | -0.20 | -0.17 | 0.10  | 0.06  | 0.12  | -0.03 | -0.03 | -0.08 | 0.02  |
| 22 | 6 | -0.03 | 0.01  | -0.05 | -0.02 | -0.04 | 0.03  | 0.00  | 0.01  | -0.02 |
| 23 | 1 | -0.01 | 0.04  | -0.02 | 0.01  | 0.09  | -0.05 | 0.01  | -0.02 | 0.03  |
| 24 | 1 | -0.05 | 0.07  | -0.09 | 0.02  | 0.06  | -0.08 | -0.04 | 0.01  | -0.02 |
| 25 | 1 | 0.00  | 0.02  | 0.01  | 0.12  | -0.07 | 0.15  | -0.04 | 0.03  | -0.04 |
| 26 | 6 | -0.05 | 0.03  | 0.03  | -0.08 | 0.04  | 0.01  | 0.06  | -0.02 | -0.03 |
| 27 | 1 | -0.12 | 0.22  | -0.03 | -0.25 | 0.26  | -0.01 | 0.09  | -0.16 | 0.03  |
| 28 | 1 | -0.06 | -0.07 | -0.02 | -0.10 | 0.04  | 0.00  | 0.12  | 0.00  | 0.02  |
| 29 | 6 | 0.07  | -0.03 | -0.01 | -0.04 | 0.01  | 0.02  | 0.03  | -0.01 | -0.03 |
| 30 | 1 | -0.10 | -0.13 | 0.10  | 0.05  | 0.04  | -0.04 | -0.02 | -0.01 | 0.01  |
| 31 | 1 | -0.06 | 0.23  | -0.09 | 0.03  | -0.13 | 0.05  | -0.02 | 0.10  | 0.00  |
| 32 | 6 | 0.02  | -0.01 | 0.01  | 0.00  | 0.00  | 0.00  | 0.00  | 0.00  | 0.00  |
| 33 | 1 | -0.12 | -0.02 | -0.10 | 0.03  | 0.02  | 0.02  | -0.01 | 0.02  | -0.01 |
| 34 | 6 | 0.00  | 0.01  | 0.01  | -0.01 | 0.00  | -0.01 | 0.00  | 0.00  | 0.00  |
| 35 | 1 | 0.06  | 0.03  | 0.00  | -0.01 | -0.02 | 0.01  | 0.01  | 0.00  | 0.00  |
| 36 | 6 | -0.04 | 0.02  | 0.00  | 0.02  | -0.03 | -0.01 | 0.01  | 0.01  | -0.02 |
| 37 | 1 | 0.08  | -0.01 | 0.11  | -0.06 | 0.04  | -0.17 | -0.04 | -0.01 | -0.02 |
| 38 | 1 | 0.05  | -0.04 | -0.04 | -0.01 | 0.04  | 0.10  | -0.06 | 0.02  | -0.08 |
| 39 | 1 | -0.02 | -0.01 | -0.19 | 0.01  | 0.05  | 0.11  | 0.00  | -0.01 | 0.07  |
| 40 | 6 | 0.06  | -0.02 | -0.03 | 0.09  | -0.05 | -0.01 | -0.07 | 0.04  | 0.01  |
| 41 | 1 | 0.12  | 0.06  | -0.10 | 0.13  | -0.04 | 0.00  | -0.14 | -0.02 | 0.04  |
| 42 | 6 | -0.06 | -0.01 | -0.04 | 0.02  | 0.01  | -0.03 | 0.03  | 0.02  | 0.01  |
| 43 | 1 | 0.13  | 0.09  | -0.27 | -0.02 | 0.00  | 0.03  | -0.05 | -0.06 | 0.13  |
| 44 | 1 | 0.12  | 0.01  | 0.06  | -0.02 | 0.01  | -0.03 | -0.02 | 0.01  | -0.09 |
| 45 | 1 | 0.02  | -0.01 | 0.23  | 0.01  | 0.02  | -0.09 | -0.01 | -0.01 | -0.10 |
| 46 | 6 | -0.02 | -0.05 | -0.02 | -0.07 | 0.00  | 0.01  | 0.00  | 0.00  | 0.03  |
| 47 | 1 | 0.05  | -0.09 | -0.02 | 0.04  | 0.02  | -0.12 | 0.14  | 0.04  | -0.14 |
| 48 | 6 | -0.03 | 0.06  | 0.03  | 0.07  | 0.06  | -0.02 | 0.02  | -0.03 | -0.02 |
| 49 | 1 | -0.02 | 0.13  | 0.02  | 0.08  | -0.13 | 0.08  | -0.04 | -0.14 | -0.05 |
| 50 | 1 | 0.07  | 0.05  | 0.03  | 0.02  | 0.22  | 0.17  | -0.01 | 0.04  | 0.05  |
| 51 | 6 | 0.05  | -0.07 | -0.04 | 0.01  | -0.11 | 0.01  | -0.03 | 0.02  | 0.01  |
| 52 | 1 | 0.04  | -0.08 | -0.05 | -0.03 | 0.02  | 0.12  | -0.08 | 0.09  | 0.05  |
| 53 | 6 | 0.00  | -0.02 | 0.00  | 0.00  | -0.03 | 0.00  | 0.00  | 0.02  | 0.00  |
| 54 | 1 | 0.25  | 0.07  | 0.24  | 0.15  | 0.02  | 0.14  | -0.13 | -0.03 | -0.12 |
| 55 | 6 | -0.04 | -0.08 | -0.02 | -0.02 | -0.06 | -0.01 | 0.02  | 0.05  | 0.01  |
| 56 | 1 | -0.05 | -0.06 | -0.04 | -0.02 | -0.07 | -0.01 | 0.03  | 0.03  | 0.02  |
| 57 | 6 | 0.03  | 0.04  | 0.02  | 0.03  | 0.07  | 0.02  | -0.02 | -0.03 | -0.01 |
| 58 | 1 | 0.13  | 0.02  | 0.14  | 0.07  | 0.06  | 0.07  | -0.07 | -0.02 | -0.08 |

|    |   |       |       |       |       |       |       |       |       |       |
|----|---|-------|-------|-------|-------|-------|-------|-------|-------|-------|
| 59 | 8 | 0.00  | -0.03 | 0.06  | -0.02 | -0.01 | 0.01  | 0.01  | 0.00  | 0.00  |
| 60 | 8 | -0.01 | 0.01  | -0.03 | -0.01 | -0.05 | 0.03  | -0.02 | -0.02 | -0.03 |
| 61 | 8 | 0.00  | 0.03  | -0.02 | 0.02  | -0.01 | -0.01 | 0.00  | 0.00  | -0.01 |
| 62 | 6 | 0.01  | 0.03  | 0.01  | 0.02  | 0.06  | -0.01 | 0.03  | 0.06  | 0.01  |
| 63 | 6 | 0.00  | 0.00  | -0.01 | -0.04 | 0.04  | 0.00  | -0.05 | 0.06  | -0.02 |
| 64 | 6 | 0.00  | 0.02  | -0.01 | -0.01 | 0.02  | 0.00  | -0.02 | 0.04  | -0.01 |
| 65 | 8 | 0.00  | -0.01 | 0.01  | 0.00  | 0.00  | -0.01 | -0.01 | -0.01 | 0.00  |
| 66 | 1 | 0.05  | 0.03  | 0.02  | 0.07  | -0.11 | 0.10  | 0.14  | -0.12 | 0.16  |
| 67 | 6 | 0.00  | -0.01 | 0.00  | 0.02  | -0.02 | -0.01 | 0.02  | -0.03 | 0.00  |
| 68 | 1 | 0.00  | 0.02  | -0.01 | -0.05 | -0.09 | -0.05 | -0.08 | -0.07 | -0.07 |
| 69 | 1 | 0.00  | 0.01  | -0.02 | -0.01 | 0.06  | 0.04  | 0.00  | 0.11  | 0.04  |
| 70 | 1 | -0.01 | -0.05 | -0.03 | -0.05 | -0.01 | 0.00  | -0.08 | -0.07 | -0.04 |
| 71 | 6 | -0.01 | -0.03 | 0.01  | 0.05  | -0.06 | 0.03  | 0.07  | -0.08 | 0.05  |
| 72 | 1 | -0.08 | 0.06  | 0.06  | -0.06 | 0.12  | -0.10 | -0.09 | 0.17  | -0.16 |
| 73 | 1 | -0.02 | 0.06  | 0.03  | -0.21 | 0.14  | 0.18  | -0.32 | 0.20  | 0.28  |
| 74 | 1 | 0.09  | 0.01  | -0.09 | 0.15  | -0.01 | -0.32 | 0.19  | -0.02 | -0.45 |

106

107

108

A

A

A

|                |           |           |           |
|----------------|-----------|-----------|-----------|
| Frequencies -- | 1056.4076 | 1059.5729 | 1067.1028 |
| Red. masses -- | 3.1649    | 1.8837    | 1.6818    |
| Frc consts --  | 2.0810    | 1.2460    | 1.1283    |
| IR Inten --    | 50.8446   | 10.9040   | 24.1877   |
| Raman Activ -- | 8.0894    | 11.4422   | 5.7115    |
| Depolar (P) -- | 0.3438    | 0.7496    | 0.7233    |
| Depolar (U) -- | 0.5116    | 0.8569    | 0.8394    |

| Atom | AN | X     | Y     | Z     | X     | Y     | Z     | X     | Y     | Z     |
|------|----|-------|-------|-------|-------|-------|-------|-------|-------|-------|
| 1    | 6  | 0.01  | 0.00  | 0.00  | 0.01  | 0.01  | 0.00  | 0.00  | 0.00  | 0.01  |
| 2    | 6  | 0.00  | 0.00  | -0.01 | 0.00  | 0.00  | 0.00  | 0.00  | 0.00  | 0.01  |
| 3    | 6  | 0.02  | 0.03  | -0.02 | 0.01  | 0.00  | -0.03 | -0.01 | 0.00  | 0.01  |
| 4    | 6  | 0.00  | 0.00  | 0.00  | 0.03  | 0.01  | 0.11  | 0.00  | 0.00  | -0.03 |
| 5    | 6  | 0.02  | -0.02 | 0.01  | -0.05 | 0.04  | -0.01 | 0.00  | -0.01 | 0.00  |
| 6    | 6  | -0.01 | 0.01  | 0.01  | 0.00  | -0.03 | 0.03  | 0.00  | 0.00  | -0.01 |
| 7    | 8  | 0.00  | 0.00  | 0.00  | 0.00  | -0.01 | 0.00  | 0.00  | 0.00  | 0.00  |
| 8    | 6  | -0.01 | 0.01  | -0.01 | 0.00  | 0.01  | 0.00  | 0.00  | 0.00  | 0.00  |
| 9    | 6  | -0.01 | -0.01 | 0.01  | -0.04 | 0.01  | -0.02 | 0.01  | 0.01  | 0.00  |
| 10   | 1  | -0.01 | 0.00  | 0.01  | -0.03 | 0.02  | -0.02 | 0.02  | -0.01 | -0.01 |
| 11   | 8  | 0.00  | 0.00  | -0.01 | 0.01  | 0.00  | 0.00  | -0.01 | 0.00  | 0.01  |
| 12   | 6  | 0.00  | 0.00  | -0.01 | 0.03  | -0.06 | 0.07  | -0.01 | 0.01  | -0.02 |
| 13   | 1  | 0.01  | -0.01 | -0.01 | 0.15  | 0.00  | 0.01  | -0.04 | 0.00  | -0.01 |
| 14   | 6  | -0.03 | -0.05 | 0.02  | 0.00  | 0.00  | 0.00  | 0.00  | 0.00  | 0.00  |
| 15   | 8  | 0.03  | -0.13 | 0.05  | 0.00  | -0.01 | 0.00  | 0.00  | 0.00  | 0.00  |
| 16   | 6  | 0.00  | 0.00  | 0.00  | 0.00  | -0.01 | 0.00  | 0.00  | 0.00  | 0.00  |
| 17   | 1  | -0.01 | 0.01  | -0.01 | 0.00  | 0.01  | 0.01  | 0.00  | 0.00  | 0.00  |
| 18   | 1  | 0.00  | 0.01  | 0.00  | -0.02 | 0.01  | -0.01 | 0.00  | 0.00  | 0.00  |
| 19   | 1  | 0.02  | 0.00  | 0.01  | 0.02  | 0.00  | 0.02  | 0.00  | 0.00  | 0.00  |
| 20   | 6  | 0.00  | 0.01  | 0.00  | 0.00  | 0.03  | 0.03  | 0.00  | 0.00  | -0.01 |
| 21   | 1  | -0.03 | 0.01  | 0.02  | -0.01 | 0.02  | 0.04  | 0.00  | -0.02 | -0.01 |
| 22   | 6  | -0.02 | -0.01 | 0.00  | -0.01 | -0.01 | 0.00  | 0.00  | 0.00  | -0.01 |
| 23   | 1  | -0.01 | 0.05  | -0.05 | 0.00  | 0.03  | -0.02 | 0.00  | 0.00  | 0.01  |
| 24   | 1  | 0.01  | 0.02  | -0.03 | 0.01  | 0.02  | -0.03 | -0.01 | 0.01  | -0.01 |
| 25   | 1  | 0.05  | -0.03 | 0.05  | 0.03  | -0.02 | 0.04  | 0.00  | 0.01  | 0.00  |
| 26   | 6  | -0.05 | 0.01  | 0.04  | 0.00  | 0.01  | -0.02 | 0.01  | 0.00  | 0.00  |

|    |   |       |       |       |       |       |       |       |       |       |
|----|---|-------|-------|-------|-------|-------|-------|-------|-------|-------|
| 27 | 1 | -0.09 | 0.21  | -0.03 | -0.07 | 0.01  | 0.02  | 0.02  | -0.02 | 0.00  |
| 28 | 1 | -0.13 | -0.05 | -0.03 | 0.07  | 0.00  | 0.02  | 0.00  | 0.00  | 0.00  |
| 29 | 6 | 0.00  | 0.00  | 0.01  | 0.00  | 0.00  | 0.00  | 0.00  | 0.00  | 0.00  |
| 30 | 1 | 0.00  | -0.02 | 0.01  | 0.01  | -0.01 | -0.01 | 0.00  | 0.00  | 0.00  |
| 31 | 1 | 0.00  | -0.01 | -0.01 | 0.00  | 0.01  | 0.01  | 0.00  | 0.01  | 0.00  |
| 32 | 6 | 0.00  | 0.00  | 0.00  | 0.01  | -0.01 | -0.01 | 0.00  | 0.00  | 0.00  |
| 33 | 1 | -0.02 | -0.02 | -0.02 | -0.01 | 0.00  | -0.03 | 0.00  | 0.02  | 0.01  |
| 34 | 6 | 0.00  | 0.00  | 0.01  | 0.00  | 0.01  | 0.01  | 0.00  | 0.00  | -0.01 |
| 35 | 1 | 0.01  | 0.01  | 0.00  | 0.00  | -0.01 | 0.02  | 0.00  | 0.00  | -0.01 |
| 36 | 6 | -0.01 | 0.00  | 0.01  | 0.02  | -0.01 | -0.06 | 0.00  | 0.00  | 0.01  |
| 37 | 1 | 0.03  | 0.01  | 0.02  | -0.08 | 0.02  | -0.15 | 0.01  | 0.00  | 0.02  |
| 38 | 1 | 0.04  | -0.01 | 0.03  | -0.07 | 0.04  | -0.06 | 0.01  | -0.01 | 0.01  |
| 39 | 1 | -0.01 | 0.01  | -0.07 | 0.00  | 0.02  | 0.08  | 0.00  | 0.00  | 0.00  |
| 40 | 6 | 0.06  | -0.03 | -0.03 | -0.01 | 0.01  | 0.00  | -0.01 | 0.00  | 0.00  |
| 41 | 1 | 0.10  | 0.03  | -0.07 | -0.03 | -0.05 | 0.05  | -0.01 | 0.00  | 0.00  |
| 42 | 6 | -0.01 | 0.02  | -0.01 | 0.02  | 0.02  | -0.01 | 0.00  | 0.00  | 0.00  |
| 43 | 1 | 0.03  | -0.02 | -0.03 | -0.03 | -0.03 | 0.06  | 0.00  | 0.00  | 0.01  |
| 44 | 1 | 0.04  | 0.02  | -0.07 | -0.01 | 0.01  | -0.06 | 0.00  | 0.00  | 0.00  |
| 45 | 1 | -0.01 | -0.04 | 0.07  | 0.00  | 0.01  | -0.09 | 0.00  | 0.00  | 0.00  |
| 46 | 6 | -0.03 | -0.04 | -0.02 | -0.03 | 0.00  | 0.03  | 0.00  | 0.00  | 0.00  |
| 47 | 1 | -0.10 | -0.11 | 0.14  | 0.26  | 0.05  | -0.29 | -0.05 | -0.01 | 0.06  |
| 48 | 6 | 0.02  | 0.12  | 0.02  | 0.04  | -0.01 | -0.02 | 0.00  | 0.00  | 0.00  |
| 49 | 1 | 0.19  | 0.20  | 0.20  | -0.04 | -0.17 | -0.05 | 0.01  | 0.02  | 0.01  |
| 50 | 1 | 0.03  | 0.16  | 0.07  | 0.03  | 0.11  | 0.12  | -0.01 | -0.02 | -0.02 |
| 51 | 6 | -0.02 | -0.15 | -0.11 | -0.02 | -0.02 | 0.01  | 0.00  | 0.00  | 0.00  |
| 52 | 1 | -0.03 | -0.23 | -0.18 | -0.10 | 0.10  | 0.09  | 0.01  | -0.01 | -0.01 |
| 53 | 6 | 0.03  | 0.12  | 0.00  | 0.00  | 0.01  | 0.00  | 0.00  | 0.00  | 0.00  |
| 54 | 1 | -0.31 | 0.02  | -0.29 | -0.04 | -0.01 | -0.04 | 0.00  | 0.00  | 0.00  |
| 55 | 6 | 0.09  | 0.21  | 0.06  | 0.01  | 0.01  | 0.00  | 0.00  | 0.00  | 0.00  |
| 56 | 1 | 0.12  | 0.14  | 0.10  | 0.01  | -0.01 | 0.02  | 0.00  | 0.00  | 0.00  |
| 57 | 6 | -0.08 | -0.10 | -0.07 | 0.00  | 0.00  | 0.00  | 0.00  | 0.00  | 0.00  |
| 58 | 1 | -0.31 | -0.06 | -0.28 | -0.02 | 0.00  | -0.02 | 0.00  | 0.00  | 0.00  |
| 59 | 8 | -0.01 | -0.01 | 0.03  | 0.00  | -0.01 | 0.01  | 0.00  | 0.00  | 0.00  |
| 60 | 8 | 0.00  | -0.01 | 0.01  | -0.01 | 0.02  | -0.07 | 0.00  | -0.03 | 0.02  |
| 61 | 8 | 0.02  | 0.03  | 0.00  | 0.01  | -0.01 | -0.02 | 0.00  | 0.00  | 0.00  |
| 62 | 6 | 0.00  | 0.02  | -0.01 | 0.00  | 0.06  | 0.01  | 0.01  | 0.02  | 0.00  |
| 63 | 6 | 0.00  | 0.00  | 0.01  | 0.06  | -0.03 | 0.01  | -0.04 | 0.04  | -0.05 |
| 64 | 6 | 0.00  | 0.01  | 0.00  | 0.05  | 0.01  | 0.01  | 0.12  | -0.05 | 0.09  |
| 65 | 8 | 0.00  | 0.00  | 0.00  | 0.00  | -0.02 | 0.02  | 0.00  | 0.00  | 0.00  |
| 66 | 1 | -0.01 | 0.01  | 0.00  | -0.08 | 0.19  | -0.14 | -0.25 | 0.21  | -0.24 |
| 67 | 6 | 0.00  | 0.00  | 0.00  | -0.03 | -0.01 | -0.01 | -0.11 | 0.05  | -0.08 |
| 68 | 1 | 0.00  | -0.02 | 0.00  | 0.07  | 0.03  | 0.05  | 0.22  | -0.10 | 0.20  |
| 69 | 1 | 0.00  | -0.01 | 0.00  | -0.01 | -0.14 | -0.07 | -0.06 | -0.55 | -0.10 |
| 70 | 1 | 0.00  | 0.00  | 0.00  | 0.07  | 0.02  | 0.00  | 0.27  | 0.35  | 0.21  |
| 71 | 6 | -0.01 | -0.01 | -0.01 | -0.11 | -0.02 | -0.04 | 0.01  | -0.04 | 0.03  |
| 72 | 1 | -0.03 | 0.01  | 0.05  | -0.18 | 0.02  | 0.42  | -0.07 | 0.08  | -0.02 |
| 73 | 1 | 0.03  | 0.01  | -0.02 | 0.37  | 0.02  | -0.25 | -0.13 | 0.10  | 0.12  |
| 74 | 1 | 0.04  | 0.01  | -0.01 | 0.13  | 0.05  | 0.18  | 0.10  | 0.00  | -0.20 |

109

110

111

A

A

A

Frequencies -- 1073.0176

1080.9064

1085.2223

Red. masses -- 2.2455

2.2448

1.7785

|             |    |          |          |         |
|-------------|----|----------|----------|---------|
| Frc consts  | -- | 1.5233   | 1.5453   | 1.2341  |
| IR Inten    | -- | 197.5919 | 144.3970 | 29.9371 |
| Raman Activ | -- | 15.9455  | 1.9949   | 3.0875  |
| Depolar (P) | -- | 0.4194   | 0.4590   | 0.6674  |
| Depolar (U) | -- | 0.5909   | 0.6292   | 0.8005  |

  

| Atom | AN | X     | Y     | Z     | X     | Y     | Z     | X     | Y     | Z     |
|------|----|-------|-------|-------|-------|-------|-------|-------|-------|-------|
| 1    | 6  | -0.01 | 0.01  | 0.02  | -0.08 | 0.03  | -0.01 | 0.01  | 0.00  | 0.01  |
| 2    | 6  | -0.03 | 0.01  | 0.07  | -0.04 | 0.01  | 0.14  | -0.01 | 0.00  | 0.01  |
| 3    | 6  | -0.01 | -0.01 | 0.01  | 0.04  | 0.00  | -0.05 | 0.00  | 0.00  | 0.00  |
| 4    | 6  | -0.01 | 0.02  | -0.10 | 0.01  | 0.01  | -0.02 | -0.01 | 0.00  | -0.01 |
| 5    | 6  | -0.01 | -0.04 | -0.01 | 0.01  | -0.01 | 0.00  | -0.01 | 0.00  | 0.00  |
| 6    | 6  | -0.02 | 0.01  | -0.02 | -0.01 | 0.00  | 0.01  | 0.01  | -0.01 | 0.01  |
| 7    | 8  | 0.00  | -0.01 | -0.01 | 0.00  | -0.01 | -0.02 | 0.00  | 0.00  | 0.00  |
| 8    | 6  | 0.00  | -0.02 | 0.03  | 0.01  | -0.05 | 0.09  | 0.00  | 0.00  | -0.01 |
| 9    | 6  | 0.01  | 0.02  | -0.02 | -0.03 | -0.01 | -0.02 | 0.01  | 0.00  | 0.00  |
| 10   | 1  | 0.03  | -0.06 | -0.04 | 0.02  | -0.06 | -0.06 | 0.01  | -0.02 | 0.00  |
| 11   | 8  | -0.01 | -0.01 | 0.02  | 0.01  | 0.00  | 0.00  | 0.00  | 0.00  | 0.00  |
| 12   | 6  | 0.00  | 0.04  | -0.03 | 0.05  | -0.05 | 0.08  | -0.01 | 0.01  | -0.01 |
| 13   | 1  | -0.06 | -0.03 | 0.05  | 0.09  | -0.02 | 0.05  | -0.01 | 0.00  | -0.01 |
| 14   | 6  | 0.01  | 0.01  | 0.00  | -0.01 | 0.00  | 0.00  | -0.02 | -0.03 | -0.03 |
| 15   | 8  | 0.00  | 0.01  | -0.01 | 0.00  | 0.00  | 0.00  | 0.06  | 0.06  | 0.05  |
| 16   | 6  | 0.00  | 0.01  | -0.02 | 0.02  | 0.03  | -0.07 | 0.00  | 0.00  | 0.00  |
| 17   | 1  | 0.06  | -0.02 | 0.06  | 0.22  | -0.07 | 0.21  | 0.01  | 0.00  | 0.01  |
| 18   | 1  | -0.06 | -0.01 | 0.00  | -0.22 | -0.04 | -0.01 | -0.01 | 0.00  | 0.00  |
| 19   | 1  | -0.07 | 0.01  | -0.01 | -0.24 | 0.04  | -0.01 | 0.01  | 0.00  | 0.01  |
| 20   | 6  | 0.01  | 0.01  | -0.01 | -0.03 | 0.02  | 0.05  | 0.00  | 0.01  | -0.01 |
| 21   | 1  | 0.04  | -0.02 | -0.05 | 0.12  | 0.07  | -0.06 | -0.01 | 0.00  | 0.00  |
| 22   | 6  | 0.02  | -0.02 | -0.03 | 0.07  | -0.03 | -0.04 | -0.01 | -0.01 | -0.01 |
| 23   | 1  | 0.06  | -0.04 | 0.13  | 0.15  | -0.15 | 0.34  | 0.01  | 0.02  | 0.00  |
| 24   | 1  | -0.11 | 0.08  | -0.08 | -0.23 | 0.10  | -0.07 | -0.02 | 0.03  | -0.04 |
| 25   | 1  | -0.05 | 0.05  | 0.02  | -0.16 | 0.14  | -0.03 | 0.02  | -0.01 | 0.04  |
| 26   | 6  | 0.01  | -0.01 | 0.01  | -0.03 | 0.01  | 0.00  | 0.00  | 0.00  | -0.01 |
| 27   | 1  | 0.09  | -0.05 | -0.01 | -0.06 | 0.04  | 0.00  | -0.01 | -0.03 | 0.01  |
| 28   | 1  | -0.02 | -0.03 | -0.01 | 0.01  | -0.05 | 0.00  | 0.04  | 0.01  | 0.01  |
| 29   | 6  | 0.00  | 0.01  | -0.02 | 0.01  | 0.04  | -0.02 | 0.00  | 0.00  | 0.01  |
| 30   | 1  | 0.01  | 0.02  | -0.02 | 0.02  | 0.03  | -0.04 | 0.00  | -0.01 | 0.01  |
| 31   | 1  | 0.00  | 0.02  | 0.01  | 0.00  | 0.07  | 0.01  | 0.00  | -0.01 | 0.00  |
| 32   | 6  | 0.00  | 0.01  | 0.01  | 0.01  | 0.02  | -0.02 | 0.00  | 0.00  | 0.01  |
| 33   | 1  | 0.07  | 0.16  | 0.09  | 0.19  | 0.36  | 0.18  | 0.01  | 0.04  | 0.02  |
| 34   | 6  | 0.01  | -0.02 | -0.04 | 0.01  | -0.03 | -0.08 | 0.00  | 0.00  | -0.01 |
| 35   | 1  | -0.02 | -0.07 | 0.00  | -0.14 | -0.22 | 0.08  | 0.00  | -0.01 | -0.01 |
| 36   | 6  | 0.00  | 0.00  | 0.05  | -0.02 | 0.02  | 0.01  | 0.01  | -0.01 | 0.00  |
| 37   | 1  | 0.05  | -0.01 | 0.10  | 0.07  | -0.01 | 0.09  | -0.02 | 0.01  | -0.03 |
| 38   | 1  | 0.03  | -0.02 | 0.03  | 0.04  | -0.03 | -0.03 | -0.01 | 0.01  | 0.02  |
| 39   | 1  | 0.01  | -0.02 | -0.01 | -0.01 | -0.02 | -0.10 | 0.00  | 0.01  | 0.03  |
| 40   | 6  | -0.01 | 0.01  | -0.01 | 0.04  | 0.01  | 0.00  | -0.01 | 0.01  | 0.01  |
| 41   | 1  | -0.05 | -0.02 | 0.00  | 0.02  | -0.03 | 0.04  | -0.03 | -0.02 | 0.03  |
| 42   | 6  | 0.01  | 0.00  | 0.01  | 0.00  | 0.00  | -0.01 | -0.01 | 0.00  | -0.01 |
| 43   | 1  | -0.04 | -0.03 | 0.08  | 0.00  | 0.01  | -0.01 | 0.02  | 0.02  | -0.05 |
| 44   | 1  | -0.03 | 0.00  | 0.00  | 0.00  | 0.00  | 0.00  | 0.02  | 0.00  | 0.01  |
| 45   | 1  | 0.00  | 0.01  | -0.05 | 0.00  | 0.01  | -0.01 | 0.01  | 0.00  | 0.04  |
| 46   | 6  | 0.02  | 0.01  | -0.02 | 0.00  | 0.00  | -0.01 | -0.02 | 0.00  | 0.00  |



|    |   |       |       |       |       |       |       |       |       |       |
|----|---|-------|-------|-------|-------|-------|-------|-------|-------|-------|
| 47 | 1 | -0.22 | -0.05 | 0.27  | -0.03 | -0.02 | 0.04  | 0.02  | 0.03  | -0.07 |
| 48 | 6 | -0.01 | 0.00  | 0.01  | 0.00  | 0.01  | 0.01  | 0.01  | -0.01 | 0.01  |
| 49 | 1 | 0.05  | 0.08  | 0.04  | 0.01  | 0.04  | 0.02  | -0.02 | -0.04 | -0.02 |
| 50 | 1 | -0.05 | -0.08 | -0.09 | 0.00  | -0.01 | -0.01 | 0.00  | -0.02 | 0.00  |
| 51 | 6 | 0.01  | 0.02  | 0.00  | 0.01  | -0.01 | -0.01 | 0.04  | 0.01  | 0.05  |
| 52 | 1 | 0.07  | -0.06 | -0.04 | 0.02  | -0.03 | -0.02 | 0.08  | 0.06  | 0.12  |
| 53 | 6 | -0.01 | -0.01 | 0.00  | 0.00  | 0.00  | 0.00  | 0.05  | -0.06 | 0.06  |
| 54 | 1 | 0.00  | -0.01 | 0.00  | 0.02  | 0.01  | 0.02  | 0.43  | 0.08  | 0.41  |
| 55 | 6 | -0.01 | -0.02 | 0.00  | 0.00  | 0.00  | 0.00  | -0.01 | 0.04  | -0.02 |
| 56 | 1 | 0.00  | -0.03 | 0.00  | 0.00  | 0.02  | -0.01 | -0.15 | 0.60  | -0.25 |
| 57 | 6 | 0.01  | 0.01  | 0.01  | 0.00  | 0.00  | -0.01 | -0.13 | -0.08 | -0.12 |
| 58 | 1 | 0.02  | 0.01  | 0.02  | -0.01 | 0.00  | 0.00  | -0.17 | -0.07 | -0.16 |
| 59 | 8 | 0.00  | 0.00  | 0.00  | -0.01 | -0.01 | 0.01  | 0.00  | 0.00  | 0.00  |
| 60 | 8 | -0.01 | -0.11 | 0.07  | -0.02 | 0.06  | -0.09 | 0.00  | -0.01 | 0.01  |
| 61 | 8 | 0.00  | 0.01  | 0.01  | 0.00  | 0.00  | 0.00  | 0.00  | -0.01 | 0.00  |
| 62 | 6 | 0.01  | 0.13  | -0.03 | 0.00  | -0.04 | 0.02  | 0.00  | 0.00  | 0.00  |
| 63 | 6 | 0.05  | 0.04  | 0.06  | -0.02 | -0.01 | -0.03 | 0.00  | 0.00  | 0.00  |
| 64 | 6 | -0.01 | 0.09  | 0.02  | 0.00  | -0.03 | -0.01 | 0.00  | 0.00  | 0.00  |
| 65 | 8 | 0.00  | -0.01 | -0.02 | -0.01 | -0.01 | 0.02  | 0.00  | 0.00  | 0.00  |
| 66 | 1 | 0.01  | 0.02  | 0.05  | 0.01  | 0.00  | -0.02 | 0.00  | 0.00  | 0.00  |
| 67 | 6 | 0.02  | -0.07 | -0.03 | -0.01 | 0.02  | 0.01  | 0.00  | 0.00  | 0.00  |
| 68 | 1 | -0.10 | -0.17 | -0.09 | 0.03  | 0.07  | 0.03  | 0.00  | -0.01 | 0.00  |
| 69 | 1 | -0.01 | 0.05  | 0.04  | 0.01  | -0.01 | -0.02 | 0.00  | 0.00  | 0.00  |
| 70 | 1 | -0.08 | -0.09 | -0.04 | 0.03  | 0.01  | 0.00  | 0.00  | 0.00  | 0.00  |
| 71 | 6 | -0.07 | -0.06 | -0.06 | 0.02  | 0.01  | 0.02  | 0.00  | 0.00  | 0.00  |
| 72 | 1 | -0.24 | 0.11  | 0.41  | 0.06  | -0.02 | -0.11 | -0.01 | 0.00  | 0.01  |
| 73 | 1 | 0.32  | 0.11  | -0.20 | -0.11 | -0.02 | 0.07  | 0.02  | 0.00  | -0.01 |
| 74 | 1 | 0.30  | 0.06  | -0.04 | -0.07 | -0.02 | 0.00  | 0.00  | 0.00  | 0.01  |

112

113

114

A

A

A

|                |           |           |           |
|----------------|-----------|-----------|-----------|
| Frequencies -- | 1092.7044 | 1096.2182 | 1120.5923 |
| Red. masses -- | 2.4005    | 2.1798    | 3.2207    |
| Frc consts --  | 1.6887    | 1.5433    | 2.3829    |
| IR Inten --    | 33.2245   | 62.1695   | 35.6177   |
| Raman Activ -- | 4.4492    | 5.2610    | 10.2656   |
| Depolar (P) -- | 0.5198    | 0.7447    | 0.6728    |
| Depolar (U) -- | 0.6841    | 0.8537    | 0.8044    |

| Atom | AN | X     | Y     | Z     | X     | Y     | Z     | X     | Y     | Z     |
|------|----|-------|-------|-------|-------|-------|-------|-------|-------|-------|
| 1    | 6  | 0.12  | 0.02  | 0.10  | 0.07  | 0.03  | 0.02  | -0.02 | -0.03 | -0.01 |
| 2    | 6  | -0.06 | 0.02  | 0.11  | 0.00  | 0.00  | -0.02 | -0.03 | 0.02  | 0.05  |
| 3    | 6  | -0.02 | 0.00  | -0.02 | -0.04 | -0.01 | 0.00  | 0.03  | -0.01 | -0.09 |
| 4    | 6  | -0.03 | 0.01  | 0.02  | -0.02 | 0.00  | 0.00  | -0.01 | 0.01  | 0.26  |
| 5    | 6  | 0.05  | 0.04  | 0.03  | -0.04 | -0.07 | -0.05 | -0.05 | 0.00  | -0.07 |
| 6    | 6  | 0.02  | -0.02 | 0.03  | -0.02 | 0.04  | -0.09 | -0.05 | 0.05  | -0.10 |
| 7    | 8  | 0.01  | -0.02 | -0.02 | -0.01 | -0.02 | 0.00  | 0.01  | 0.00  | -0.01 |
| 8    | 6  | -0.04 | 0.04  | -0.05 | -0.02 | 0.04  | -0.04 | -0.03 | -0.02 | 0.00  |
| 9    | 6  | 0.02  | -0.05 | 0.04  | -0.08 | -0.04 | -0.01 | 0.10  | 0.04  | -0.02 |
| 10   | 1  | 0.04  | -0.14 | 0.01  | -0.06 | -0.07 | -0.03 | 0.06  | 0.11  | 0.02  |
| 11   | 8  | 0.01  | 0.01  | -0.04 | 0.02  | 0.01  | -0.03 | -0.03 | -0.02 | 0.03  |
| 12   | 6  | -0.05 | 0.03  | -0.07 | 0.07  | -0.04 | 0.10  | -0.10 | 0.00  | -0.11 |
| 13   | 1  | -0.03 | 0.03  | -0.06 | 0.27  | 0.03  | 0.04  | -0.05 | 0.08  | -0.17 |
| 14   | 6  | -0.01 | 0.00  | 0.01  | 0.02  | 0.00  | -0.01 | 0.02  | -0.01 | -0.01 |

|    |   |       |       |       |       |       |       |       |       |       |
|----|---|-------|-------|-------|-------|-------|-------|-------|-------|-------|
| 15 | 8 | -0.01 | -0.02 | 0.00  | 0.00  | 0.02  | 0.00  | -0.01 | 0.01  | -0.01 |
| 16 | 6 | 0.03  | -0.03 | 0.00  | 0.00  | -0.03 | 0.02  | 0.02  | 0.03  | -0.01 |
| 17 | 1 | 0.06  | 0.03  | 0.06  | -0.05 | 0.06  | -0.03 | 0.09  | -0.06 | 0.06  |
| 18 | 1 | -0.07 | 0.04  | -0.04 | 0.00  | 0.05  | -0.05 | -0.01 | -0.05 | 0.05  |
| 19 | 1 | 0.08  | 0.00  | 0.08  | 0.15  | -0.01 | 0.08  | -0.13 | 0.01  | -0.04 |
| 20 | 6 | 0.03  | 0.09  | -0.06 | 0.03  | 0.09  | 0.03  | -0.02 | -0.04 | -0.03 |
| 21 | 1 | -0.10 | -0.03 | 0.02  | -0.05 | 0.03  | 0.08  | -0.04 | 0.01  | -0.01 |
| 22 | 6 | -0.07 | -0.07 | -0.06 | -0.05 | -0.04 | -0.01 | 0.01  | 0.02  | 0.01  |
| 23 | 1 | 0.08  | 0.21  | 0.01  | 0.02  | 0.15  | -0.05 | -0.03 | -0.05 | -0.03 |
| 24 | 1 | -0.14 | 0.29  | -0.36 | -0.01 | 0.13  | -0.17 | 0.02  | -0.06 | 0.08  |
| 25 | 1 | 0.17  | -0.05 | 0.31  | 0.14  | -0.06 | 0.20  | -0.06 | 0.02  | -0.11 |
| 26 | 6 | 0.03  | -0.02 | -0.03 | 0.01  | -0.01 | 0.06  | -0.04 | -0.01 | 0.07  |
| 27 | 1 | 0.01  | -0.10 | 0.02  | 0.20  | 0.00  | -0.05 | 0.15  | 0.02  | -0.05 |
| 28 | 1 | 0.16  | -0.06 | 0.02  | -0.17 | -0.02 | -0.05 | -0.16 | -0.11 | -0.05 |
| 29 | 6 | -0.01 | -0.02 | 0.05  | -0.02 | -0.02 | 0.03  | 0.05  | 0.00  | 0.00  |
| 30 | 1 | -0.04 | -0.07 | 0.06  | 0.02  | -0.03 | -0.01 | -0.09 | -0.01 | 0.10  |
| 31 | 1 | 0.00  | -0.06 | -0.05 | 0.00  | -0.08 | 0.03  | -0.01 | 0.09  | -0.12 |
| 32 | 6 | 0.01  | 0.00  | 0.04  | 0.02  | -0.01 | 0.00  | 0.00  | 0.01  | 0.02  |
| 33 | 1 | 0.04  | 0.32  | 0.11  | -0.05 | -0.04 | -0.07 | 0.07  | 0.21  | 0.10  |
| 34 | 6 | 0.02  | -0.04 | -0.07 | 0.00  | 0.01  | 0.01  | 0.01  | -0.02 | -0.03 |
| 35 | 1 | -0.02 | -0.06 | -0.06 | 0.02  | 0.04  | -0.01 | -0.07 | -0.07 | 0.02  |
| 36 | 6 | 0.01  | -0.03 | -0.01 | 0.04  | 0.02  | -0.01 | 0.04  | -0.01 | -0.09 |
| 37 | 1 | -0.03 | 0.03  | -0.11 | -0.08 | -0.03 | 0.00  | -0.17 | 0.00  | -0.23 |
| 38 | 1 | -0.01 | 0.03  | 0.08  | -0.09 | 0.02  | -0.15 | -0.17 | 0.07  | -0.14 |
| 39 | 1 | 0.00  | 0.04  | 0.06  | 0.02  | -0.05 | 0.17  | 0.01  | 0.02  | 0.20  |
| 40 | 6 | -0.06 | 0.04  | 0.00  | 0.00  | -0.02 | -0.04 | 0.06  | 0.01  | -0.06 |
| 41 | 1 | -0.17 | -0.08 | 0.10  | 0.00  | 0.06  | -0.13 | -0.04 | -0.12 | 0.03  |
| 42 | 6 | -0.02 | 0.01  | -0.02 | 0.02  | 0.00  | 0.05  | 0.04  | 0.00  | 0.06  |
| 43 | 1 | 0.05  | 0.01  | -0.08 | -0.07 | -0.06 | 0.16  | -0.12 | -0.06 | 0.24  |
| 44 | 1 | 0.05  | 0.01  | -0.03 | -0.07 | -0.01 | -0.01 | -0.13 | -0.02 | -0.01 |
| 45 | 1 | 0.00  | -0.02 | 0.07  | -0.02 | -0.01 | -0.07 | -0.02 | 0.00  | -0.17 |
| 46 | 6 | 0.00  | -0.02 | 0.01  | 0.04  | -0.01 | -0.01 | 0.01  | -0.03 | 0.01  |
| 47 | 1 | 0.15  | 0.01  | -0.16 | -0.29 | -0.11 | 0.41  | -0.10 | -0.07 | 0.15  |
| 48 | 6 | -0.02 | 0.00  | 0.00  | -0.01 | 0.01  | -0.01 | 0.01  | 0.02  | -0.03 |
| 49 | 1 | -0.05 | 0.01  | -0.04 | 0.09  | 0.07  | 0.09  | 0.11  | 0.00  | 0.10  |
| 50 | 1 | 0.05  | 0.01  | 0.03  | -0.15 | -0.09 | -0.14 | -0.15 | -0.02 | -0.09 |
| 51 | 6 | -0.01 | 0.00  | -0.02 | 0.01  | 0.02  | 0.03  | -0.01 | 0.00  | 0.03  |
| 52 | 1 | -0.09 | 0.03  | -0.04 | 0.19  | -0.11 | -0.01 | 0.23  | -0.12 | 0.03  |
| 53 | 6 | -0.01 | 0.02  | -0.01 | 0.00  | -0.02 | 0.00  | 0.00  | -0.01 | 0.00  |
| 54 | 1 | -0.09 | -0.01 | -0.08 | 0.04  | -0.01 | 0.04  | 0.04  | 0.00  | 0.03  |
| 55 | 6 | 0.00  | 0.00  | 0.01  | -0.01 | -0.01 | -0.01 | 0.00  | 0.00  | 0.00  |
| 56 | 1 | 0.03  | -0.10 | 0.05  | -0.02 | 0.03  | -0.03 | -0.01 | 0.01  | -0.02 |
| 57 | 6 | 0.02  | 0.00  | 0.02  | 0.00  | 0.01  | 0.00  | 0.00  | 0.02  | 0.00  |
| 58 | 1 | 0.03  | 0.00  | 0.04  | -0.01 | 0.01  | -0.02 | -0.03 | 0.03  | -0.05 |
| 59 | 8 | 0.01  | -0.02 | 0.01  | 0.00  | 0.00  | 0.02  | -0.01 | -0.01 | 0.04  |
| 60 | 8 | 0.01  | 0.00  | 0.04  | -0.02 | 0.03  | -0.08 | 0.03  | -0.01 | 0.08  |
| 61 | 8 | -0.01 | 0.00  | -0.01 | 0.01  | 0.03  | 0.02  | 0.02  | 0.01  | 0.01  |
| 62 | 6 | 0.00  | -0.01 | -0.01 | 0.01  | -0.02 | 0.02  | 0.00  | 0.02  | -0.01 |
| 63 | 6 | 0.00  | -0.02 | 0.00  | -0.01 | 0.01  | -0.01 | -0.01 | -0.02 | 0.00  |
| 64 | 6 | -0.01 | -0.03 | -0.01 | 0.00  | 0.00  | 0.00  | 0.00  | -0.03 | -0.02 |
| 65 | 8 | 0.00  | 0.01  | 0.00  | -0.01 | -0.01 | 0.01  | 0.00  | 0.01  | -0.01 |
| 66 | 1 | 0.00  | -0.02 | -0.01 | 0.00  | 0.00  | 0.00  | 0.01  | -0.04 | -0.01 |

|                |    |           |       |       |           |       |       |           |       |       |
|----------------|----|-----------|-------|-------|-----------|-------|-------|-----------|-------|-------|
| 67             | 6  | 0.00      | 0.02  | 0.01  | 0.00      | 0.00  | 0.00  | 0.00      | 0.02  | 0.02  |
| 68             | 1  | 0.01      | 0.05  | 0.02  | 0.01      | 0.02  | 0.01  | 0.03      | 0.08  | 0.03  |
| 69             | 1  | 0.01      | 0.02  | 0.00  | 0.00      | 0.00  | -0.01 | 0.01      | 0.01  | -0.01 |
| 70             | 1  | 0.01      | 0.01  | 0.00  | 0.00      | -0.01 | 0.00  | 0.02      | 0.01  | 0.00  |
| 71             | 6  | 0.01      | 0.02  | 0.00  | 0.01      | 0.00  | 0.01  | 0.01      | 0.02  | 0.00  |
| 72             | 1  | 0.06      | -0.04 | -0.07 | 0.00      | 0.01  | -0.02 | 0.05      | -0.04 | -0.05 |
| 73             | 1  | -0.01     | -0.05 | 0.00  | -0.05     | 0.01  | 0.04  | -0.01     | -0.05 | -0.01 |
| 74             | 1  | -0.08     | -0.01 | 0.06  | 0.01      | 0.00  | -0.03 | -0.05     | 0.00  | 0.03  |
|                |    | 115       |       |       | 116       |       |       | 117       |       |       |
|                |    | A         |       |       | A         |       |       | A         |       |       |
| Frequencies -- |    | 1134.3370 |       |       | 1144.4015 |       |       | 1149.5402 |       |       |
| Red. masses -- |    | 1.6287    |       |       | 2.6343    |       |       | 2.9135    |       |       |
| Frc consts --  |    | 1.2348    |       |       | 2.0327    |       |       | 2.2684    |       |       |
| IR Inten --    |    | 2.0658    |       |       | 27.0332   |       |       | 200.0358  |       |       |
| Raman Activ -- |    | 19.6536   |       |       | 7.8819    |       |       | 6.6811    |       |       |
| Depolar (P) -- |    | 0.4121    |       |       | 0.6811    |       |       | 0.4517    |       |       |
| Depolar (U) -- |    | 0.5837    |       |       | 0.8103    |       |       | 0.6223    |       |       |
| Atom           | AN | X         | Y     | Z     | X         | Y     | Z     | X         | Y     | Z     |
| 1              | 6  | -0.05     | 0.04  | 0.01  | -0.03     | 0.05  | 0.02  | 0.02      | 0.00  | 0.03  |
| 2              | 6  | 0.04      | -0.02 | -0.04 | 0.04      | -0.02 | -0.06 | 0.00      | 0.00  | -0.02 |
| 3              | 6  | 0.01      | 0.05  | 0.03  | 0.07      | -0.07 | -0.01 | -0.02     | 0.00  | -0.01 |
| 4              | 6  | -0.02     | 0.05  | 0.01  | -0.10     | 0.13  | -0.05 | 0.07      | -0.01 | -0.02 |
| 5              | 6  | 0.02      | 0.00  | -0.03 | 0.03      | 0.00  | 0.05  | -0.01     | -0.01 | 0.00  |
| 6              | 6  | -0.09     | -0.02 | 0.09  | 0.12      | 0.01  | -0.07 | -0.03     | 0.00  | -0.02 |
| 7              | 8  | 0.00      | 0.01  | 0.00  | -0.01     | -0.01 | 0.01  | 0.00      | 0.00  | 0.00  |
| 8              | 6  | 0.01      | 0.00  | -0.02 | 0.03      | -0.06 | 0.06  | 0.05      | -0.01 | 0.03  |
| 9              | 6  | 0.01      | -0.01 | -0.03 | 0.05      | -0.03 | -0.09 | -0.02     | 0.00  | 0.00  |
| 10             | 1  | 0.03      | -0.01 | -0.04 | 0.16      | -0.21 | -0.17 | 0.08      | -0.14 | -0.07 |
| 11             | 8  | 0.00      | 0.00  | 0.01  | 0.00      | 0.00  | 0.02  | 0.01      | 0.00  | 0.01  |
| 12             | 6  | -0.02     | -0.02 | 0.01  | -0.08     | -0.03 | -0.01 | 0.01      | 0.02  | 0.00  |
| 13             | 1  | 0.02      | -0.01 | 0.00  | 0.14      | 0.03  | -0.04 | -0.05     | -0.06 | 0.08  |
| 14             | 6  | -0.01     | 0.01  | 0.01  | 0.00      | 0.00  | -0.01 | 0.00      | 0.00  | 0.00  |
| 15             | 8  | 0.00      | 0.01  | 0.00  | 0.00      | 0.00  | 0.00  | 0.00      | 0.00  | 0.00  |
| 16             | 6  | -0.01     | 0.00  | 0.01  | -0.01     | 0.02  | -0.02 | -0.02     | 0.00  | -0.01 |
| 17             | 1  | -0.04     | 0.00  | -0.04 | 0.03      | -0.04 | 0.03  | -0.03     | 0.01  | -0.02 |
| 18             | 1  | 0.05      | 0.00  | 0.01  | -0.02     | -0.03 | 0.02  | -0.01     | 0.01  | -0.02 |
| 19             | 1  | 0.02      | -0.01 | -0.02 | -0.09     | 0.01  | -0.04 | 0.01      | 0.00  | 0.00  |
| 20             | 6  | -0.01     | -0.01 | 0.03  | -0.03     | 0.07  | 0.10  | -0.01     | 0.02  | 0.01  |
| 21             | 1  | -0.02     | 0.01  | 0.04  | 0.03      | 0.08  | 0.04  | 0.02      | -0.04 | -0.03 |
| 22             | 6  | 0.03      | -0.02 | -0.02 | 0.01      | -0.02 | -0.02 | 0.00      | 0.00  | -0.02 |
| 23             | 1  | 0.07      | -0.04 | 0.14  | 0.06      | -0.01 | 0.10  | 0.02      | 0.01  | 0.03  |
| 24             | 1  | -0.09     | 0.05  | -0.04 | -0.08     | 0.06  | -0.06 | -0.03     | 0.03  | -0.03 |
| 25             | 1  | -0.04     | 0.05  | 0.03  | -0.01     | 0.03  | 0.07  | 0.00      | 0.01  | 0.03  |
| 26             | 6  | 0.00      | 0.02  | -0.04 | -0.03     | -0.04 | 0.03  | 0.01      | 0.01  | 0.01  |
| 27             | 1  | -0.15     | 0.03  | 0.04  | 0.13      | -0.10 | -0.04 | 0.06      | -0.02 | 0.00  |
| 28             | 1  | 0.35      | -0.25 | 0.03  | -0.23     | 0.13  | -0.01 | -0.05     | 0.04  | -0.01 |
| 29             | 6  | 0.00      | 0.00  | 0.00  | -0.02     | 0.01  | -0.02 | -0.03     | 0.00  | -0.02 |
| 30             | 1  | 0.00      | 0.01  | 0.01  | 0.04      | 0.05  | -0.05 | 0.10      | 0.01  | -0.12 |
| 31             | 1  | 0.00      | 0.00  | 0.01  | -0.01     | 0.02  | 0.09  | -0.02     | 0.01  | 0.15  |
| 32             | 6  | -0.01     | -0.01 | 0.00  | 0.00      | -0.01 | -0.04 | -0.01     | 0.00  | -0.01 |
| 33             | 1  | -0.07     | -0.22 | -0.08 | -0.04     | -0.21 | -0.10 | -0.04     | -0.13 | -0.06 |
| 34             | 6  | 0.00      | 0.02  | 0.02  | -0.01     | 0.03  | 0.04  | 0.00      | 0.01  | 0.01  |

|    |   |       |       |       |       |       |       |       |       |       |
|----|---|-------|-------|-------|-------|-------|-------|-------|-------|-------|
| 35 | 1 | 0.13  | 0.12  | -0.07 | 0.06  | 0.05  | 0.03  | 0.07  | 0.04  | -0.02 |
| 36 | 6 | 0.02  | -0.04 | 0.00  | 0.05  | -0.08 | 0.01  | -0.04 | 0.02  | 0.01  |
| 37 | 1 | -0.06 | 0.04  | -0.18 | -0.13 | 0.07  | -0.33 | 0.10  | 0.00  | 0.12  |
| 38 | 1 | -0.05 | 0.04  | 0.07  | -0.10 | 0.10  | 0.23  | 0.08  | -0.04 | 0.02  |
| 39 | 1 | 0.02  | 0.07  | 0.10  | 0.04  | 0.15  | 0.26  | -0.02 | -0.02 | -0.15 |
| 40 | 6 | -0.01 | 0.04  | 0.01  | 0.02  | 0.04  | -0.01 | -0.01 | -0.02 | -0.01 |
| 41 | 1 | -0.21 | -0.39 | 0.40  | -0.04 | 0.04  | -0.04 | 0.02  | 0.08  | -0.11 |
| 42 | 6 | 0.04  | 0.01  | -0.03 | -0.07 | 0.00  | 0.02  | 0.02  | 0.00  | 0.01  |
| 43 | 1 | -0.05 | 0.03  | 0.05  | 0.10  | -0.02 | -0.13 | -0.05 | -0.02 | 0.08  |
| 44 | 1 | -0.07 | 0.00  | -0.02 | 0.13  | 0.01  | 0.00  | -0.04 | 0.00  | -0.01 |
| 45 | 1 | 0.01  | 0.06  | -0.17 | -0.02 | -0.08 | 0.27  | 0.00  | 0.02  | -0.07 |
| 46 | 6 | 0.03  | -0.03 | -0.03 | -0.01 | -0.03 | 0.04  | -0.01 | 0.02  | 0.00  |
| 47 | 1 | -0.11 | -0.13 | 0.23  | 0.16  | -0.03 | -0.11 | -0.03 | 0.05  | -0.02 |
| 48 | 6 | -0.03 | 0.01  | 0.02  | 0.00  | -0.01 | -0.03 | 0.01  | 0.00  | 0.01  |
| 49 | 1 | -0.01 | 0.09  | 0.01  | 0.10  | 0.00  | 0.09  | -0.06 | -0.05 | -0.06 |
| 50 | 1 | -0.03 | -0.09 | -0.10 | -0.09 | 0.01  | -0.02 | 0.05  | 0.03  | 0.05  |
| 51 | 6 | 0.06  | 0.00  | -0.03 | -0.05 | 0.02  | 0.02  | 0.00  | -0.01 | 0.01  |
| 52 | 1 | 0.03  | -0.05 | -0.09 | -0.03 | -0.02 | -0.02 | 0.01  | 0.03  | 0.05  |
| 53 | 6 | 0.00  | 0.00  | 0.00  | 0.00  | 0.01  | 0.00  | 0.00  | 0.00  | 0.00  |
| 54 | 1 | 0.00  | 0.00  | 0.00  | -0.02 | 0.00  | -0.02 | 0.01  | 0.00  | 0.02  |
| 55 | 6 | 0.00  | -0.01 | 0.00  | 0.00  | 0.00  | 0.00  | 0.00  | 0.01  | 0.00  |
| 56 | 1 | 0.00  | 0.00  | 0.00  | 0.01  | -0.03 | 0.01  | 0.00  | 0.02  | -0.01 |
| 57 | 6 | 0.00  | 0.00  | 0.00  | 0.00  | 0.00  | 0.00  | 0.00  | 0.00  | 0.00  |
| 58 | 1 | -0.01 | 0.00  | 0.01  | 0.02  | -0.01 | 0.01  | -0.01 | 0.01  | -0.01 |
| 59 | 8 | 0.01  | -0.03 | -0.02 | -0.01 | 0.00  | 0.00  | 0.00  | 0.01  | 0.01  |
| 60 | 8 | 0.00  | 0.00  | 0.00  | 0.01  | -0.01 | 0.02  | -0.03 | -0.08 | 0.02  |
| 61 | 8 | 0.00  | 0.01  | 0.00  | 0.01  | 0.02  | -0.02 | 0.00  | -0.01 | 0.00  |
| 62 | 6 | 0.00  | 0.01  | 0.00  | 0.00  | 0.01  | -0.01 | 0.08  | 0.20  | -0.02 |
| 63 | 6 | 0.00  | 0.00  | 0.00  | 0.00  | 0.00  | 0.00  | -0.04 | -0.02 | 0.06  |
| 64 | 6 | 0.00  | -0.01 | -0.01 | 0.00  | -0.01 | -0.01 | 0.01  | -0.18 | -0.16 |
| 65 | 8 | 0.00  | 0.00  | 0.00  | 0.00  | 0.00  | -0.01 | -0.01 | -0.02 | -0.01 |
| 66 | 1 | 0.00  | -0.02 | -0.01 | 0.00  | -0.01 | 0.00  | -0.01 | -0.29 | -0.14 |
| 67 | 6 | 0.00  | 0.01  | 0.01  | 0.00  | 0.01  | 0.00  | -0.05 | 0.11  | 0.13  |
| 68 | 1 | 0.01  | 0.04  | 0.01  | 0.01  | 0.02  | 0.01  | 0.19  | 0.58  | 0.19  |
| 69 | 1 | 0.00  | 0.00  | -0.01 | 0.00  | 0.00  | 0.00  | 0.05  | 0.04  | -0.14 |
| 70 | 1 | 0.01  | 0.00  | 0.00  | 0.00  | 0.00  | 0.00  | 0.13  | -0.04 | -0.06 |
| 71 | 6 | 0.00  | 0.01  | 0.00  | 0.00  | 0.00  | 0.00  | 0.01  | 0.01  | -0.01 |
| 72 | 1 | 0.02  | -0.01 | -0.02 | 0.01  | -0.01 | 0.00  | 0.08  | -0.07 | -0.09 |
| 73 | 1 | -0.01 | -0.01 | 0.00  | 0.01  | -0.01 | -0.01 | 0.05  | -0.06 | -0.05 |
| 74 | 1 | -0.01 | 0.00  | 0.00  | -0.01 | 0.00  | 0.01  | 0.00  | 0.01  | 0.00  |

118

119

120

A

A

A

|                |           |           |           |
|----------------|-----------|-----------|-----------|
| Frequencies -- | 1156.1874 | 1162.6332 | 1164.8183 |
| Red. masses -- | 2.2635    | 2.2795    | 2.4665    |
| Frc consts --  | 1.7827    | 1.8154    | 1.9718    |
| IR Inten --    | 28.1722   | 50.6621   | 9.3342    |
| Raman Activ -- | 11.6347   | 10.2198   | 9.3366    |
| Depolar (P) -- | 0.6354    | 0.4074    | 0.6701    |
| Depolar (U) -- | 0.7770    | 0.5789    | 0.8025    |

| Atom | AN | X     | Y     | Z     | X     | Y     | Z    | X     | Y     | Z     |
|------|----|-------|-------|-------|-------|-------|------|-------|-------|-------|
| 1    | 6  | 0.00  | -0.06 | -0.09 | -0.04 | -0.04 | 0.08 | 0.12  | -0.09 | 0.02  |
| 2    | 6  | -0.02 | 0.02  | 0.05  | -0.02 | 0.01  | 0.05 | -0.02 | 0.02  | -0.02 |

|    |   |       |       |       |       |       |       |       |       |       |
|----|---|-------|-------|-------|-------|-------|-------|-------|-------|-------|
| 3  | 6 | 0.01  | 0.00  | 0.06  | 0.00  | 0.00  | -0.02 | -0.02 | 0.03  | 0.01  |
| 4  | 6 | 0.00  | 0.15  | -0.08 | 0.04  | 0.10  | -0.03 | -0.05 | 0.03  | 0.04  |
| 5  | 6 | -0.01 | -0.03 | 0.01  | 0.04  | 0.00  | 0.07  | -0.03 | -0.01 | -0.04 |
| 6  | 6 | 0.03  | -0.03 | 0.01  | -0.05 | 0.07  | -0.07 | 0.03  | -0.06 | 0.04  |
| 7  | 8 | 0.01  | 0.01  | -0.01 | 0.01  | 0.02  | -0.01 | 0.01  | 0.00  | 0.00  |
| 8  | 6 | -0.08 | 0.05  | -0.06 | 0.09  | 0.01  | -0.04 | 0.11  | -0.06 | 0.13  |
| 9  | 6 | -0.02 | 0.04  | 0.00  | -0.03 | 0.03  | 0.08  | 0.00  | 0.05  | 0.09  |
| 10 | 1 | -0.09 | 0.36  | 0.09  | -0.10 | 0.26  | 0.16  | -0.02 | 0.07  | 0.10  |
| 11 | 8 | -0.01 | -0.02 | 0.00  | 0.03  | 0.01  | -0.01 | 0.04  | 0.00  | 0.00  |
| 12 | 6 | 0.01  | -0.08 | 0.07  | 0.03  | -0.07 | 0.01  | 0.05  | -0.04 | -0.03 |
| 13 | 1 | 0.12  | -0.07 | 0.07  | -0.04 | -0.07 | 0.00  | -0.02 | -0.02 | -0.06 |
| 14 | 6 | 0.00  | 0.02  | 0.01  | 0.01  | -0.02 | -0.01 | 0.00  | 0.03  | 0.02  |
| 15 | 8 | 0.01  | 0.01  | 0.01  | -0.01 | -0.02 | -0.01 | 0.02  | 0.03  | 0.01  |
| 16 | 6 | 0.03  | -0.01 | 0.02  | -0.03 | -0.01 | 0.02  | -0.03 | 0.02  | -0.06 |
| 17 | 1 | 0.02  | 0.01  | 0.01  | -0.13 | 0.04  | -0.11 | 0.05  | -0.02 | 0.05  |
| 18 | 1 | 0.02  | 0.00  | 0.01  | 0.07  | 0.05  | -0.03 | -0.12 | -0.02 | -0.03 |
| 19 | 1 | 0.04  | -0.01 | 0.03  | 0.10  | -0.02 | -0.03 | -0.12 | 0.02  | -0.02 |
| 20 | 6 | 0.05  | -0.04 | -0.05 | -0.02 | -0.03 | -0.09 | -0.09 | 0.01  | -0.08 |
| 21 | 1 | -0.03 | 0.05  | 0.04  | -0.03 | -0.02 | -0.07 | 0.00  | -0.04 | -0.16 |
| 22 | 6 | -0.01 | 0.04  | 0.05  | 0.02  | 0.00  | -0.04 | -0.06 | 0.03  | 0.01  |
| 23 | 1 | -0.12 | -0.01 | -0.19 | 0.03  | -0.07 | 0.10  | -0.11 | 0.09  | -0.21 |
| 24 | 1 | 0.16  | -0.13 | 0.16  | -0.11 | 0.02  | -0.02 | 0.12  | -0.04 | 0.01  |
| 25 | 1 | 0.01  | -0.07 | -0.13 | -0.10 | 0.08  | -0.05 | 0.09  | -0.09 | -0.01 |
| 26 | 6 | 0.00  | 0.00  | 0.00  | -0.02 | -0.01 | 0.03  | 0.02  | 0.01  | -0.02 |
| 27 | 1 | -0.02 | 0.03  | 0.00  | 0.20  | -0.17 | -0.02 | -0.12 | 0.11  | 0.01  |
| 28 | 1 | -0.04 | 0.06  | 0.00  | -0.10 | -0.04 | -0.03 | 0.08  | 0.01  | 0.01  |
| 29 | 6 | 0.06  | -0.02 | 0.03  | -0.05 | -0.02 | -0.01 | -0.08 | 0.02  | -0.06 |
| 30 | 1 | -0.13 | -0.05 | 0.15  | 0.15  | -0.04 | -0.17 | 0.27  | -0.04 | -0.33 |
| 31 | 1 | 0.01  | 0.01  | -0.19 | -0.06 | 0.06  | 0.25  | -0.09 | 0.18  | 0.42  |
| 32 | 6 | 0.01  | 0.01  | 0.03  | -0.04 | 0.00  | 0.04  | -0.01 | 0.02  | -0.03 |
| 33 | 1 | 0.08  | 0.31  | 0.13  | -0.07 | -0.16 | -0.01 | 0.04  | 0.03  | 0.01  |
| 34 | 6 | 0.00  | -0.03 | -0.02 | 0.02  | -0.01 | -0.04 | 0.00  | -0.01 | 0.01  |
| 35 | 1 | -0.19 | -0.12 | 0.06  | 0.24  | 0.16  | -0.20 | -0.09 | -0.14 | 0.12  |
| 36 | 6 | 0.00  | -0.08 | 0.02  | -0.04 | -0.04 | 0.01  | 0.03  | -0.02 | -0.02 |
| 37 | 1 | -0.02 | 0.10  | -0.26 | 0.08  | 0.08  | -0.10 | -0.09 | 0.01  | -0.13 |
| 38 | 1 | 0.02  | 0.05  | 0.29  | 0.11  | 0.00  | 0.23  | -0.07 | 0.04  | 0.01  |
| 39 | 1 | 0.02  | 0.16  | 0.05  | -0.01 | 0.12  | -0.14 | 0.02  | 0.03  | 0.14  |
| 40 | 6 | 0.00  | 0.00  | 0.00  | 0.03  | 0.00  | -0.03 | -0.02 | 0.00  | 0.01  |
| 41 | 1 | -0.06 | -0.06 | 0.04  | -0.07 | -0.11 | 0.04  | -0.04 | 0.00  | 0.01  |
| 42 | 6 | -0.02 | 0.01  | -0.01 | 0.03  | -0.03 | 0.03  | -0.02 | 0.02  | -0.02 |
| 43 | 1 | 0.04  | -0.02 | -0.05 | -0.07 | 0.02  | 0.09  | 0.05  | -0.02 | -0.05 |
| 44 | 1 | 0.06  | 0.02  | -0.04 | -0.09 | -0.03 | 0.08  | 0.07  | 0.02  | -0.08 |
| 45 | 1 | -0.01 | -0.04 | 0.10  | 0.00  | 0.05  | -0.12 | -0.01 | -0.04 | 0.08  |
| 46 | 6 | 0.02  | -0.01 | 0.00  | -0.03 | -0.03 | 0.02  | 0.02  | -0.01 | -0.02 |
| 47 | 1 | 0.00  | -0.10 | 0.14  | 0.16  | 0.01  | -0.19 | -0.07 | -0.13 | 0.23  |
| 48 | 6 | -0.01 | 0.00  | 0.00  | 0.01  | 0.00  | -0.02 | -0.01 | 0.00  | 0.01  |
| 49 | 1 | 0.02  | 0.02  | 0.02  | 0.04  | -0.04 | 0.03  | 0.02  | 0.05  | 0.03  |
| 50 | 1 | -0.06 | -0.05 | -0.06 | -0.03 | 0.04  | 0.02  | -0.06 | -0.08 | -0.09 |
| 51 | 6 | 0.00  | 0.02  | -0.01 | -0.02 | 0.00  | 0.03  | 0.02  | 0.01  | -0.02 |
| 52 | 1 | -0.07 | 0.00  | -0.05 | 0.18  | -0.08 | 0.05  | -0.12 | 0.01  | -0.09 |
| 53 | 6 | 0.00  | 0.00  | 0.00  | 0.00  | 0.00  | 0.00  | 0.00  | 0.00  | 0.00  |
| 54 | 1 | -0.04 | -0.02 | -0.03 | 0.06  | 0.02  | 0.05  | -0.08 | -0.03 | -0.07 |

|    |   |       |       |       |       |       |       |       |       |       |
|----|---|-------|-------|-------|-------|-------|-------|-------|-------|-------|
| 55 | 6 | 0.00  | -0.01 | 0.00  | 0.00  | 0.02  | 0.00  | 0.00  | -0.03 | 0.00  |
| 56 | 1 | 0.00  | -0.01 | 0.00  | 0.00  | 0.02  | 0.00  | 0.00  | -0.03 | 0.00  |
| 57 | 6 | -0.01 | -0.01 | -0.01 | 0.01  | 0.02  | 0.01  | -0.02 | -0.02 | -0.02 |
| 58 | 1 | 0.01  | -0.02 | 0.02  | -0.02 | 0.03  | -0.04 | 0.02  | -0.03 | 0.03  |
| 59 | 8 | 0.00  | -0.01 | -0.01 | 0.00  | -0.01 | 0.01  | 0.01  | 0.00  | 0.00  |
| 60 | 8 | -0.01 | -0.01 | -0.03 | 0.00  | 0.02  | -0.02 | 0.00  | 0.01  | 0.00  |
| 61 | 8 | 0.00  | 0.02  | 0.00  | 0.00  | 0.01  | -0.02 | 0.01  | 0.01  | 0.01  |
| 62 | 6 | 0.02  | 0.05  | 0.00  | -0.01 | -0.02 | 0.00  | -0.01 | -0.01 | 0.00  |
| 63 | 6 | -0.01 | 0.00  | 0.02  | 0.01  | 0.00  | -0.01 | 0.00  | 0.00  | 0.00  |
| 64 | 6 | 0.00  | -0.04 | -0.04 | 0.00  | 0.02  | 0.02  | 0.00  | 0.01  | 0.01  |
| 65 | 8 | 0.00  | -0.01 | 0.00  | 0.00  | 0.00  | 0.00  | 0.00  | 0.00  | 0.00  |
| 66 | 1 | 0.00  | -0.08 | -0.03 | 0.00  | 0.04  | 0.02  | 0.00  | 0.01  | 0.01  |
| 67 | 6 | -0.01 | 0.02  | 0.03  | 0.01  | -0.01 | -0.01 | 0.00  | 0.00  | -0.01 |
| 68 | 1 | 0.05  | 0.15  | 0.05  | -0.02 | -0.06 | -0.02 | -0.01 | -0.02 | -0.01 |
| 69 | 1 | 0.01  | 0.01  | -0.04 | 0.00  | 0.00  | 0.02  | 0.00  | 0.00  | 0.01  |
| 70 | 1 | 0.04  | -0.01 | -0.02 | -0.01 | 0.01  | 0.01  | 0.00  | 0.00  | 0.00  |
| 71 | 6 | 0.00  | 0.00  | 0.00  | 0.00  | 0.00  | 0.00  | 0.00  | 0.00  | 0.00  |
| 72 | 1 | 0.01  | -0.01 | -0.01 | -0.01 | 0.01  | 0.00  | 0.00  | 0.00  | 0.00  |
| 73 | 1 | 0.01  | 0.00  | -0.01 | -0.01 | 0.01  | 0.01  | -0.02 | -0.01 | 0.01  |
| 74 | 1 | 0.02  | 0.00  | -0.02 | -0.01 | 0.00  | 0.00  | 0.00  | 0.00  | 0.00  |

121

122

123

A

A

A

|                |           |           |           |
|----------------|-----------|-----------|-----------|
| Frequencies -- | 1172.2135 | 1178.2209 | 1180.1007 |
| Red. masses -- | 2.2510    | 1.9783    | 3.0281    |
| Frc consts --  | 1.8224    | 1.6181    | 2.4846    |
| IR Inten --    | 26.3241   | 2.8925    | 18.7873   |
| Raman Activ -- | 10.8926   | 1.7435    | 1.4104    |
| Depolar (P) -- | 0.6183    | 0.5381    | 0.5821    |
| Depolar (U) -- | 0.7641    | 0.6997    | 0.7359    |

| Atom | AN | X     | Y     | Z     | X     | Y     | Z     | X     | Y     | Z     |
|------|----|-------|-------|-------|-------|-------|-------|-------|-------|-------|
| 1    | 6  | 0.09  | -0.02 | -0.07 | -0.01 | -0.01 | -0.01 | 0.01  | 0.01  | -0.01 |
| 2    | 6  | 0.02  | 0.00  | -0.06 | 0.00  | 0.00  | 0.01  | 0.01  | 0.00  | -0.02 |
| 3    | 6  | -0.05 | 0.02  | 0.06  | 0.01  | 0.01  | 0.01  | -0.02 | 0.00  | 0.01  |
| 4    | 6  | 0.02  | 0.04  | -0.04 | -0.09 | -0.10 | -0.03 | 0.08  | 0.03  | -0.01 |
| 5    | 6  | 0.05  | 0.01  | 0.07  | -0.03 | 0.01  | 0.03  | 0.02  | 0.01  | 0.04  |
| 6    | 6  | -0.10 | 0.11  | -0.01 | 0.06  | 0.13  | 0.02  | -0.09 | 0.03  | -0.02 |
| 7    | 8  | -0.01 | -0.02 | 0.01  | 0.00  | 0.01  | 0.00  | 0.00  | -0.01 | 0.00  |
| 8    | 6  | -0.03 | -0.01 | 0.08  | 0.00  | 0.00  | -0.01 | -0.02 | 0.01  | 0.02  |
| 9    | 6  | 0.01  | -0.01 | -0.02 | -0.02 | 0.02  | 0.02  | 0.00  | -0.02 | -0.02 |
| 10   | 1  | 0.08  | -0.18 | -0.09 | -0.07 | 0.12  | 0.07  | 0.06  | -0.16 | -0.07 |
| 11   | 8  | 0.00  | -0.01 | 0.00  | 0.00  | 0.00  | 0.00  | 0.00  | 0.00  | 0.00  |
| 12   | 6  | -0.01 | -0.01 | -0.01 | 0.07  | 0.04  | 0.02  | -0.03 | -0.01 | -0.01 |
| 13   | 1  | -0.09 | -0.05 | 0.03  | 0.09  | 0.03  | 0.04  | -0.12 | -0.03 | 0.01  |
| 14   | 6  | -0.01 | -0.05 | -0.02 | 0.00  | 0.00  | 0.00  | 0.04  | 0.09  | 0.03  |
| 15   | 8  | -0.04 | -0.06 | -0.03 | 0.01  | 0.02  | 0.01  | 0.11  | 0.17  | 0.09  |
| 16   | 6  | 0.01  | 0.00  | -0.04 | 0.00  | 0.00  | 0.01  | 0.00  | -0.01 | -0.01 |
| 17   | 1  | 0.11  | -0.01 | 0.11  | -0.01 | 0.00  | -0.02 | 0.02  | 0.01  | 0.03  |
| 18   | 1  | -0.12 | -0.02 | -0.01 | 0.02  | 0.00  | 0.01  | -0.03 | 0.00  | -0.01 |
| 19   | 1  | -0.09 | 0.03  | 0.05  | 0.00  | 0.00  | -0.01 | 0.00  | 0.01  | 0.03  |
| 20   | 6  | -0.01 | 0.04  | 0.04  | 0.00  | -0.03 | -0.03 | 0.01  | 0.02  | 0.03  |
| 21   | 1  | 0.03  | -0.01 | -0.02 | -0.01 | -0.02 | -0.01 | 0.02  | -0.01 | 0.01  |
| 22   | 6  | -0.05 | 0.01  | 0.04  | 0.00  | 0.00  | 0.01  | -0.01 | 0.00  | 0.00  |

|    |   |       |       |       |       |       |       |       |       |       |
|----|---|-------|-------|-------|-------|-------|-------|-------|-------|-------|
| 23 | 1 | -0.08 | 0.11  | -0.19 | -0.01 | -0.01 | -0.01 | 0.00  | 0.02  | -0.02 |
| 24 | 1 | 0.16  | -0.05 | 0.03  | 0.01  | -0.01 | 0.02  | 0.02  | 0.00  | -0.01 |
| 25 | 1 | 0.14  | -0.11 | 0.05  | -0.01 | -0.01 | -0.03 | 0.03  | -0.01 | 0.03  |
| 26 | 6 | 0.01  | 0.00  | -0.01 | -0.02 | -0.05 | -0.02 | 0.01  | 0.01  | 0.01  |
| 27 | 1 | 0.08  | -0.15 | 0.02  | -0.08 | -0.03 | 0.01  | 0.11  | -0.10 | 0.00  |
| 28 | 1 | 0.13  | -0.15 | 0.00  | 0.21  | -0.23 | 0.02  | -0.03 | -0.01 | -0.02 |
| 29 | 6 | 0.00  | 0.02  | -0.01 | 0.01  | 0.00  | 0.00  | 0.00  | 0.00  | 0.00  |
| 30 | 1 | 0.01  | 0.00  | -0.02 | 0.00  | -0.01 | 0.00  | -0.02 | 0.01  | 0.02  |
| 31 | 1 | 0.01  | 0.01  | -0.01 | -0.01 | 0.02  | 0.00  | 0.02  | -0.05 | -0.04 |
| 32 | 6 | 0.04  | 0.01  | -0.05 | -0.01 | 0.00  | 0.01  | 0.01  | 0.00  | -0.01 |
| 33 | 1 | 0.08  | 0.15  | 0.01  | 0.01  | 0.02  | 0.02  | 0.01  | 0.01  | -0.02 |
| 34 | 6 | -0.02 | 0.00  | 0.04  | 0.00  | 0.00  | -0.01 | -0.01 | 0.00  | 0.01  |
| 35 | 1 | -0.28 | -0.22 | 0.24  | 0.01  | 0.01  | -0.02 | -0.07 | -0.04 | 0.06  |
| 36 | 6 | -0.02 | -0.03 | 0.01  | 0.05  | 0.05  | 0.00  | -0.04 | -0.02 | 0.01  |
| 37 | 1 | 0.03  | 0.04  | -0.06 | -0.08 | -0.08 | 0.13  | 0.09  | 0.04  | 0.00  |
| 38 | 1 | 0.05  | 0.00  | 0.13  | -0.09 | 0.00  | -0.22 | 0.10  | -0.03 | 0.13  |
| 39 | 1 | 0.00  | 0.06  | -0.06 | 0.01  | -0.13 | 0.17  | -0.02 | 0.05  | -0.16 |
| 40 | 6 | -0.01 | -0.02 | 0.01  | 0.00  | 0.04  | 0.03  | 0.00  | -0.03 | -0.01 |
| 41 | 1 | 0.03  | -0.06 | 0.06  | 0.02  | -0.14 | 0.23  | 0.03  | 0.05  | -0.09 |
| 42 | 6 | 0.05  | -0.05 | 0.00  | -0.04 | -0.05 | -0.01 | 0.04  | -0.02 | 0.01  |
| 43 | 1 | -0.10 | 0.10  | 0.06  | 0.04  | 0.10  | -0.16 | -0.08 | 0.03  | 0.10  |
| 44 | 1 | -0.15 | -0.05 | 0.18  | 0.05  | -0.03 | 0.20  | -0.11 | -0.02 | 0.04  |
| 45 | 1 | 0.03  | 0.14  | -0.22 | 0.04  | 0.10  | 0.12  | 0.01  | 0.06  | -0.18 |
| 46 | 6 | -0.01 | -0.04 | 0.01  | -0.05 | -0.05 | 0.06  | -0.05 | -0.02 | 0.02  |
| 47 | 1 | 0.12  | 0.00  | -0.16 | 0.17  | -0.01 | -0.19 | 0.14  | -0.02 | -0.16 |
| 48 | 6 | 0.00  | 0.00  | -0.01 | 0.02  | 0.00  | -0.06 | 0.03  | 0.04  | -0.02 |
| 49 | 1 | 0.03  | -0.01 | 0.02  | 0.33  | 0.06  | 0.29  | 0.08  | -0.03 | 0.07  |
| 50 | 1 | 0.02  | 0.02  | 0.02  | -0.23 | -0.03 | -0.13 | -0.14 | 0.00  | -0.08 |
| 51 | 6 | 0.00  | -0.01 | 0.01  | -0.02 | 0.01  | 0.01  | 0.01  | -0.04 | 0.01  |
| 52 | 1 | 0.24  | -0.07 | 0.06  | 0.17  | -0.22 | -0.12 | -0.03 | -0.16 | -0.12 |
| 53 | 6 | 0.00  | 0.00  | 0.00  | 0.00  | 0.00  | 0.00  | 0.00  | 0.01  | -0.01 |
| 54 | 1 | 0.17  | 0.06  | 0.16  | -0.04 | -0.01 | -0.04 | -0.42 | -0.15 | -0.38 |
| 55 | 6 | 0.01  | 0.07  | -0.01 | 0.00  | -0.02 | 0.00  | -0.02 | -0.19 | 0.02  |
| 56 | 1 | 0.00  | 0.09  | -0.02 | 0.01  | -0.07 | 0.02  | 0.02  | -0.31 | 0.07  |
| 57 | 6 | 0.04  | 0.04  | 0.04  | -0.01 | 0.00  | -0.01 | -0.12 | -0.07 | -0.11 |
| 58 | 1 | -0.03 | 0.06  | -0.04 | -0.01 | 0.00  | -0.02 | -0.06 | -0.09 | -0.04 |
| 59 | 8 | 0.00  | 0.00  | -0.02 | 0.00  | 0.00  | -0.02 | 0.00  | 0.00  | 0.00  |
| 60 | 8 | 0.00  | 0.00  | 0.00  | -0.02 | -0.02 | -0.01 | 0.01  | 0.01  | 0.01  |
| 61 | 8 | 0.00  | 0.01  | -0.02 | 0.02  | 0.02  | -0.02 | 0.00  | 0.00  | -0.01 |
| 62 | 6 | 0.00  | -0.01 | 0.00  | 0.02  | 0.03  | 0.00  | -0.01 | -0.01 | 0.00  |
| 63 | 6 | 0.00  | 0.00  | -0.01 | -0.01 | 0.02  | 0.02  | 0.00  | -0.01 | -0.01 |
| 64 | 6 | 0.00  | 0.01  | 0.01  | 0.01  | -0.02 | -0.03 | 0.00  | 0.01  | 0.01  |
| 65 | 8 | 0.00  | 0.00  | 0.00  | 0.00  | -0.01 | 0.00  | 0.00  | 0.00  | 0.00  |
| 66 | 1 | 0.00  | 0.02  | 0.01  | -0.01 | -0.07 | -0.03 | 0.01  | 0.03  | 0.01  |
| 67 | 6 | 0.00  | 0.00  | -0.01 | -0.01 | 0.01  | 0.02  | 0.01  | 0.00  | -0.01 |
| 68 | 1 | -0.01 | -0.04 | -0.01 | 0.03  | 0.10  | 0.03  | -0.01 | -0.04 | -0.01 |
| 69 | 1 | 0.00  | 0.00  | 0.01  | 0.01  | 0.00  | -0.03 | 0.00  | 0.00  | 0.01  |
| 70 | 1 | -0.01 | 0.01  | 0.01  | 0.02  | -0.02 | -0.02 | -0.01 | 0.01  | 0.01  |
| 71 | 6 | 0.00  | 0.00  | 0.00  | 0.00  | -0.01 | -0.01 | 0.00  | 0.00  | 0.00  |
| 72 | 1 | 0.00  | 0.00  | 0.00  | -0.01 | 0.00  | 0.00  | 0.00  | 0.00  | -0.01 |
| 73 | 1 | 0.00  | 0.00  | 0.00  | 0.02  | 0.02  | -0.01 | -0.01 | -0.01 | 0.01  |
| 74 | 1 | -0.02 | 0.00  | 0.01  | 0.04  | 0.00  | -0.02 | -0.02 | 0.00  | 0.01  |

|                |    |  | 124       |       |       | 125       |       |       | 126       |       |       |
|----------------|----|--|-----------|-------|-------|-----------|-------|-------|-----------|-------|-------|
|                |    |  | A         |       |       | A         |       |       | A         |       |       |
| Frequencies -- |    |  | 1192.9875 |       |       | 1199.1897 |       |       | 1209.0691 |       |       |
| Red. masses -- |    |  | 2.2771    |       |       | 1.7944    |       |       | 1.9362    |       |       |
| Frc consts --  |    |  | 1.9094    |       |       | 1.5204    |       |       | 1.6677    |       |       |
| IR Inten --    |    |  | 3.6039    |       |       | 8.0422    |       |       | 0.5017    |       |       |
| Raman Activ -- |    |  | 5.5890    |       |       | 13.5718   |       |       | 17.5202   |       |       |
| Depolar (P) -- |    |  | 0.2990    |       |       | 0.2435    |       |       | 0.6899    |       |       |
| Depolar (U) -- |    |  | 0.4603    |       |       | 0.3917    |       |       | 0.8165    |       |       |
| Atom           | AN |  | X         | Y     | Z     | X         | Y     | Z     | X         | Y     | Z     |
| 1              | 6  |  | -0.07     | -0.07 | -0.01 | -0.01     | -0.01 | 0.03  | 0.00      | 0.01  | 0.01  |
| 2              | 6  |  | -0.01     | 0.01  | 0.03  | -0.02     | 0.01  | 0.02  | 0.00      | 0.00  | 0.00  |
| 3              | 6  |  | 0.02      | -0.03 | -0.01 | 0.03      | -0.10 | -0.02 | 0.00      | 0.02  | -0.01 |
| 4              | 6  |  | -0.02     | 0.00  | 0.02  | -0.05     | 0.03  | 0.01  | 0.15      | 0.04  | 0.03  |
| 5              | 6  |  | -0.01     | 0.01  | -0.01 | 0.02      | 0.02  | 0.01  | -0.12     | -0.03 | -0.04 |
| 6              | 6  |  | -0.01     | 0.01  | 0.03  | -0.09     | 0.03  | 0.09  | 0.04      | -0.02 | 0.02  |
| 7              | 8  |  | 0.00      | 0.00  | 0.00  | 0.00      | 0.00  | 0.00  | 0.00      | 0.00  | 0.00  |
| 8              | 6  |  | 0.04      | 0.22  | -0.02 | 0.01      | -0.06 | -0.03 | 0.00      | -0.01 | 0.01  |
| 9              | 6  |  | 0.03      | -0.01 | -0.07 | 0.01      | 0.00  | 0.00  | -0.01     | -0.01 | 0.00  |
| 10             | 1  |  | 0.16      | -0.21 | -0.16 | -0.03     | 0.13  | 0.03  | 0.02      | -0.15 | -0.03 |
| 11             | 8  |  | 0.02      | 0.01  | 0.03  | 0.00      | 0.00  | 0.00  | 0.00      | 0.00  | -0.01 |
| 12             | 6  |  | -0.04     | 0.01  | -0.02 | -0.03     | -0.01 | 0.01  | -0.02     | -0.02 | -0.02 |
| 13             | 1  |  | -0.01     | 0.03  | -0.04 | 0.20      | 0.07  | -0.05 | -0.17     | -0.04 | -0.01 |
| 14             | 6  |  | 0.00      | 0.00  | 0.00  | 0.00      | 0.00  | 0.01  | 0.02      | 0.03  | 0.04  |
| 15             | 8  |  | 0.00      | -0.01 | 0.00  | -0.01     | -0.01 | -0.01 | -0.04     | -0.03 | -0.03 |
| 16             | 6  |  | -0.02     | -0.10 | 0.01  | 0.00      | 0.03  | 0.01  | 0.00      | 0.00  | 0.00  |
| 17             | 1  |  | -0.12     | 0.22  | -0.04 | -0.01     | -0.06 | -0.03 | 0.01      | 0.00  | 0.01  |
| 18             | 1  |  | -0.08     | 0.17  | -0.19 | 0.07      | -0.04 | 0.06  | -0.01     | 0.00  | 0.00  |
| 19             | 1  |  | 0.32      | 0.00  | 0.22  | -0.06     | -0.01 | -0.08 | 0.00      | 0.00  | 0.01  |
| 20             | 6  |  | 0.02      | 0.02  | 0.07  | 0.01      | 0.02  | -0.02 | 0.00      | 0.01  | 0.02  |
| 21             | 1  |  | 0.01      | 0.03  | 0.07  | -0.02     | 0.08  | 0.02  | 0.03      | -0.02 | -0.02 |
| 22             | 6  |  | 0.03      | 0.04  | 0.00  | 0.00      | 0.00  | -0.01 | 0.00      | -0.01 | -0.01 |
| 23             | 1  |  | -0.03     | -0.13 | 0.03  | 0.00      | -0.02 | 0.01  | 0.01      | 0.01  | 0.02  |
| 24             | 1  |  | -0.03     | -0.09 | 0.12  | -0.02     | 0.00  | 0.00  | -0.02     | 0.01  | -0.02 |
| 25             | 1  |  | -0.10     | 0.06  | -0.14 | -0.02     | 0.01  | -0.02 | 0.00      | 0.01  | 0.02  |
| 26             | 6  |  | 0.00      | 0.00  | -0.02 | 0.03      | 0.01  | -0.05 | 0.03      | -0.01 | -0.01 |
| 27             | 1  |  | -0.08     | 0.02  | 0.01  | -0.07     | -0.08 | 0.05  | -0.13     | 0.16  | 0.01  |
| 28             | 1  |  | 0.06      | -0.01 | 0.01  | 0.13      | 0.02  | 0.02  | 0.13      | -0.10 | 0.00  |
| 29             | 6  |  | -0.07     | -0.08 | -0.01 | 0.01      | 0.01  | 0.01  | 0.00      | 0.01  | 0.00  |
| 30             | 1  |  | 0.22      | -0.21 | -0.25 | -0.04     | 0.05  | 0.05  | -0.04     | 0.05  | 0.05  |
| 31             | 1  |  | -0.05     | -0.05 | 0.31  | -0.01     | 0.04  | -0.02 | 0.03      | -0.07 | -0.07 |
| 32             | 6  |  | 0.03      | 0.00  | 0.01  | -0.02     | 0.00  | 0.01  | 0.00      | -0.01 | -0.01 |
| 33             | 1  |  | 0.01      | 0.06  | 0.00  | -0.01     | 0.00  | 0.02  | -0.02     | -0.06 | -0.03 |
| 34             | 6  |  | 0.00      | -0.04 | -0.05 | 0.01      | 0.01  | -0.01 | 0.00      | 0.00  | 0.00  |
| 35             | 1  |  | -0.24     | -0.19 | 0.07  | 0.14      | 0.10  | -0.09 | 0.05      | 0.04  | -0.03 |
| 36             | 6  |  | 0.01      | 0.00  | -0.01 | 0.03      | -0.01 | -0.01 | -0.06     | -0.02 | 0.00  |
| 37             | 1  |  | -0.03     | -0.01 | -0.02 | -0.06     | -0.01 | -0.06 | 0.13      | 0.05  | 0.00  |
| 38             | 1  |  | -0.04     | 0.02  | -0.02 | -0.06     | 0.04  | 0.01  | 0.13      | -0.05 | 0.12  |
| 39             | 1  |  | 0.01      | 0.00  | 0.05  | 0.01      | 0.02  | 0.12  | -0.03     | 0.06  | -0.19 |
| 40             | 6  |  | 0.01      | -0.01 | 0.04  | -0.03     | -0.07 | 0.08  | -0.06     | -0.02 | 0.00  |
| 41             | 1  |  | 0.10      | 0.12  | -0.07 | 0.23      | 0.56  | -0.50 | -0.05     | 0.09  | -0.12 |
| 42             | 6  |  | 0.00      | -0.01 | -0.01 | 0.03      | -0.03 | -0.03 | -0.03     | 0.01  | -0.01 |



|    |   |       |       |       |       |       |       |       |       |       |
|----|---|-------|-------|-------|-------|-------|-------|-------|-------|-------|
| 43 | 1 | 0.00  | 0.03  | -0.03 | -0.05 | 0.09  | -0.01 | 0.04  | -0.01 | -0.05 |
| 44 | 1 | 0.00  | 0.00  | 0.03  | -0.07 | -0.02 | 0.09  | 0.06  | 0.01  | -0.02 |
| 45 | 1 | 0.01  | 0.03  | -0.01 | 0.04  | 0.11  | -0.15 | 0.00  | -0.02 | 0.09  |
| 46 | 6 | 0.00  | -0.01 | 0.00  | 0.00  | -0.04 | -0.02 | -0.06 | 0.00  | 0.06  |
| 47 | 1 | 0.00  | -0.03 | 0.02  | 0.04  | -0.12 | 0.06  | 0.08  | -0.04 | -0.01 |
| 48 | 6 | 0.00  | 0.00  | 0.00  | -0.01 | 0.01  | 0.00  | 0.04  | 0.00  | -0.03 |
| 49 | 1 | 0.04  | 0.02  | 0.04  | 0.05  | 0.04  | 0.05  | 0.32  | 0.07  | 0.27  |
| 50 | 1 | -0.03 | -0.02 | -0.03 | -0.05 | -0.06 | -0.08 | -0.37 | -0.18 | -0.29 |
| 51 | 6 | 0.01  | 0.00  | -0.01 | 0.04  | 0.00  | -0.02 | 0.01  | 0.06  | -0.01 |
| 52 | 1 | 0.00  | -0.02 | -0.03 | -0.02 | -0.02 | -0.07 | -0.07 | -0.17 | -0.26 |
| 53 | 6 | 0.00  | 0.00  | 0.00  | 0.00  | -0.01 | 0.00  | 0.00  | -0.03 | 0.01  |
| 54 | 1 | 0.02  | 0.00  | 0.02  | 0.02  | 0.00  | 0.02  | 0.07  | -0.02 | 0.06  |
| 55 | 6 | 0.00  | 0.01  | 0.00  | 0.00  | 0.01  | 0.00  | -0.01 | 0.03  | -0.01 |
| 56 | 1 | 0.00  | 0.02  | 0.00  | -0.01 | 0.03  | -0.01 | -0.06 | 0.22  | -0.09 |
| 57 | 6 | 0.01  | 0.00  | 0.01  | 0.01  | 0.00  | 0.01  | 0.04  | -0.01 | 0.04  |
| 58 | 1 | 0.00  | 0.00  | 0.00  | -0.01 | 0.00  | 0.00  | 0.05  | -0.02 | 0.05  |
| 59 | 8 | 0.00  | 0.02  | -0.01 | 0.00  | 0.05  | -0.01 | 0.01  | -0.01 | 0.02  |
| 60 | 8 | 0.01  | 0.00  | 0.01  | 0.00  | 0.00  | 0.00  | 0.01  | 0.01  | 0.01  |
| 61 | 8 | 0.00  | 0.00  | 0.00  | 0.01  | 0.01  | -0.01 | 0.02  | 0.01  | 0.00  |
| 62 | 6 | 0.00  | 0.00  | 0.00  | 0.00  | 0.00  | 0.00  | 0.00  | 0.00  | 0.00  |
| 63 | 6 | 0.00  | 0.00  | 0.00  | 0.00  | 0.01  | 0.01  | 0.00  | -0.02 | -0.02 |
| 64 | 6 | 0.00  | 0.00  | 0.00  | 0.00  | 0.00  | -0.01 | -0.01 | 0.01  | 0.01  |
| 65 | 8 | 0.00  | 0.00  | 0.00  | 0.00  | 0.00  | 0.00  | 0.00  | 0.00  | 0.00  |
| 66 | 1 | 0.00  | 0.01  | 0.00  | 0.00  | -0.02 | -0.01 | 0.01  | 0.04  | 0.01  |
| 67 | 6 | 0.00  | 0.00  | 0.00  | 0.00  | 0.00  | 0.01  | 0.01  | 0.00  | -0.01 |
| 68 | 1 | 0.00  | -0.01 | 0.00  | 0.01  | 0.02  | 0.01  | -0.02 | -0.05 | -0.02 |
| 69 | 1 | 0.00  | 0.00  | 0.01  | 0.00  | 0.00  | -0.01 | 0.00  | 0.00  | 0.02  |
| 70 | 1 | 0.00  | 0.00  | 0.00  | 0.01  | -0.01 | 0.00  | -0.01 | 0.02  | 0.01  |
| 71 | 6 | 0.00  | 0.00  | 0.00  | 0.00  | 0.00  | 0.00  | 0.00  | 0.01  | 0.01  |
| 72 | 1 | 0.00  | 0.00  | 0.00  | 0.00  | 0.00  | 0.01  | 0.02  | -0.01 | -0.02 |
| 73 | 1 | 0.00  | -0.01 | 0.00  | 0.00  | 0.00  | 0.00  | -0.02 | -0.02 | 0.01  |
| 74 | 1 | -0.01 | 0.00  | 0.01  | 0.02  | 0.00  | -0.01 | -0.04 | 0.00  | 0.02  |

127

128

129

A

A

A

|                |           |           |           |
|----------------|-----------|-----------|-----------|
| Frequencies -- | 1219.3148 | 1236.5792 | 1246.6500 |
| Red. masses -- | 1.9494    | 1.5197    | 2.9256    |
| Frc consts --  | 1.7076    | 1.3692    | 2.6789    |
| IR Inten --    | 19.5929   | 11.7625   | 254.8417  |
| Raman Activ -- | 7.8591    | 18.8578   | 9.1404    |
| Depolar (P) -- | 0.5946    | 0.4417    | 0.4728    |
| Depolar (U) -- | 0.7457    | 0.6128    | 0.6421    |

| Atom | AN | X     | Y     | Z     | X     | Y     | Z     | X     | Y     | Z     |
|------|----|-------|-------|-------|-------|-------|-------|-------|-------|-------|
| 1    | 6  | 0.00  | -0.01 | 0.00  | 0.02  | 0.02  | -0.06 | 0.01  | -0.05 | -0.02 |
| 2    | 6  | -0.01 | 0.00  | 0.01  | -0.01 | 0.00  | 0.02  | -0.03 | 0.01  | 0.05  |
| 3    | 6  | 0.02  | 0.00  | 0.00  | -0.01 | 0.02  | 0.02  | -0.01 | -0.01 | 0.00  |
| 4    | 6  | 0.07  | 0.05  | 0.01  | 0.02  | -0.02 | -0.02 | -0.04 | -0.01 | -0.01 |
| 5    | 6  | -0.09 | -0.06 | -0.06 | 0.01  | -0.01 | -0.01 | 0.01  | 0.00  | 0.01  |
| 6    | 6  | 0.07  | 0.11  | 0.01  | 0.00  | 0.00  | -0.01 | 0.00  | 0.02  | 0.01  |
| 7    | 8  | 0.00  | 0.00  | 0.00  | 0.00  | 0.00  | 0.00  | 0.01  | 0.01  | -0.01 |
| 8    | 6  | 0.00  | -0.02 | 0.00  | -0.04 | -0.08 | -0.10 | 0.02  | 0.02  | 0.04  |
| 9    | 6  | 0.00  | -0.01 | -0.01 | 0.00  | -0.04 | -0.04 | -0.02 | 0.03  | 0.00  |
| 10   | 1  | 0.02  | -0.02 | -0.02 | 0.06  | 0.00  | -0.07 | 0.06  | 0.00  | -0.04 |

|    |   |       |       |       |       |       |       |       |       |       |
|----|---|-------|-------|-------|-------|-------|-------|-------|-------|-------|
| 11 | 8 | 0.00  | 0.00  | 0.00  | 0.03  | 0.04  | 0.02  | -0.02 | -0.02 | 0.00  |
| 12 | 6 | -0.03 | -0.02 | 0.00  | -0.04 | 0.02  | 0.01  | 0.03  | 0.01  | 0.02  |
| 13 | 1 | 0.02  | 0.00  | -0.02 | 0.12  | 0.02  | 0.03  | 0.09  | -0.06 | 0.09  |
| 14 | 6 | -0.04 | -0.08 | -0.06 | 0.01  | 0.02  | 0.01  | 0.01  | 0.02  | 0.01  |
| 15 | 8 | 0.04  | 0.02  | 0.04  | -0.01 | 0.00  | -0.01 | -0.01 | 0.00  | 0.00  |
| 16 | 6 | 0.00  | 0.01  | 0.00  | 0.01  | 0.04  | 0.03  | -0.01 | -0.01 | -0.01 |
| 17 | 1 | 0.00  | -0.01 | 0.00  | 0.00  | -0.10 | -0.04 | 0.01  | 0.03  | 0.02  |
| 18 | 1 | 0.01  | -0.01 | 0.01  | 0.12  | -0.06 | 0.10  | -0.04 | 0.01  | -0.03 |
| 19 | 1 | -0.01 | 0.00  | -0.02 | -0.08 | -0.02 | -0.12 | 0.02  | 0.01  | 0.04  |
| 20 | 6 | 0.00  | 0.02  | 0.01  | 0.01  | 0.00  | 0.04  | -0.01 | 0.01  | 0.00  |
| 21 | 1 | -0.01 | 0.03  | 0.02  | -0.16 | 0.08  | 0.21  | 0.06  | 0.02  | -0.05 |
| 22 | 6 | 0.00  | 0.00  | 0.00  | -0.01 | 0.00  | 0.02  | 0.00  | 0.01  | 0.01  |
| 23 | 1 | -0.01 | 0.00  | -0.01 | -0.02 | 0.03  | -0.04 | -0.04 | -0.01 | -0.05 |
| 24 | 1 | 0.00  | 0.00  | 0.00  | 0.06  | -0.01 | 0.01  | 0.03  | -0.02 | 0.03  |
| 25 | 1 | 0.00  | 0.00  | -0.01 | 0.02  | -0.03 | -0.01 | 0.00  | -0.02 | -0.05 |
| 26 | 6 | 0.03  | -0.05 | -0.02 | 0.00  | 0.00  | 0.00  | -0.01 | 0.00  | 0.00  |
| 27 | 1 | -0.21 | 0.18  | 0.01  | 0.00  | 0.02  | 0.00  | 0.03  | -0.05 | 0.00  |
| 28 | 1 | 0.29  | -0.30 | 0.01  | -0.01 | 0.00  | 0.00  | -0.03 | 0.03  | 0.00  |
| 29 | 6 | 0.00  | 0.00  | 0.00  | -0.01 | -0.03 | 0.00  | 0.01  | 0.01  | 0.00  |
| 30 | 1 | 0.01  | -0.01 | -0.01 | 0.20  | -0.34 | -0.23 | -0.10 | 0.17  | 0.11  |
| 31 | 1 | -0.01 | 0.03  | 0.02  | -0.23 | 0.52  | 0.36  | 0.10  | -0.21 | -0.16 |
| 32 | 6 | 0.00  | 0.00  | 0.00  | -0.01 | 0.00  | 0.02  | 0.00  | -0.01 | -0.01 |
| 33 | 1 | -0.01 | -0.02 | -0.01 | 0.07  | 0.19  | 0.12  | -0.07 | -0.16 | -0.09 |
| 34 | 6 | 0.00  | 0.00  | 0.00  | 0.00  | 0.01  | 0.01  | 0.02  | 0.00  | -0.02 |
| 35 | 1 | 0.06  | 0.05  | -0.04 | 0.07  | 0.07  | -0.04 | 0.14  | 0.09  | -0.11 |
| 36 | 6 | -0.02 | -0.02 | 0.00  | -0.01 | 0.01  | 0.01  | 0.02  | 0.01  | 0.00  |
| 37 | 1 | 0.05  | 0.04  | -0.05 | 0.02  | 0.00  | 0.03  | -0.04 | -0.02 | 0.02  |
| 38 | 1 | 0.04  | -0.01 | 0.08  | 0.01  | -0.02 | -0.02 | -0.04 | 0.02  | -0.04 |
| 39 | 1 | 0.00  | 0.05  | -0.06 | 0.00  | -0.02 | -0.04 | 0.01  | -0.02 | 0.06  |
| 40 | 6 | -0.07 | -0.01 | 0.03  | 0.00  | 0.00  | -0.01 | 0.02  | 0.01  | 0.01  |
| 41 | 1 | 0.02  | 0.13  | -0.09 | 0.00  | -0.05 | 0.05  | 0.04  | -0.02 | 0.05  |
| 42 | 6 | -0.03 | -0.03 | -0.01 | 0.00  | 0.00  | 0.00  | 0.00  | -0.01 | -0.01 |
| 43 | 1 | 0.03  | 0.06  | -0.10 | 0.00  | -0.01 | 0.01  | -0.02 | 0.01  | 0.01  |
| 44 | 1 | 0.05  | -0.02 | 0.13  | 0.00  | 0.00  | 0.00  | 0.00  | -0.01 | 0.04  |
| 45 | 1 | 0.03  | 0.05  | 0.12  | 0.00  | 0.00  | 0.00  | 0.01  | 0.03  | 0.00  |
| 46 | 6 | 0.04  | 0.03  | -0.02 | -0.01 | 0.01  | 0.01  | 0.01  | -0.01 | -0.01 |
| 47 | 1 | -0.16 | 0.04  | 0.15  | -0.03 | 0.07  | -0.06 | 0.00  | -0.05 | 0.04  |
| 48 | 6 | 0.00  | -0.02 | 0.00  | 0.01  | 0.01  | 0.00  | 0.00  | 0.01  | 0.00  |
| 49 | 1 | -0.11 | -0.06 | -0.11 | 0.01  | -0.01 | 0.00  | -0.05 | -0.03 | -0.04 |
| 50 | 1 | 0.20  | 0.12  | 0.19  | -0.03 | 0.01  | -0.01 | 0.05  | 0.04  | 0.04  |
| 51 | 6 | -0.05 | -0.01 | 0.02  | 0.00  | 0.00  | 0.00  | 0.00  | -0.02 | 0.00  |
| 52 | 1 | 0.39  | 0.03  | 0.25  | -0.05 | -0.04 | -0.05 | -0.08 | -0.01 | -0.03 |
| 53 | 6 | -0.01 | 0.05  | -0.01 | 0.00  | -0.01 | 0.00  | 0.00  | -0.01 | 0.00  |
| 54 | 1 | 0.01  | 0.06  | -0.01 | -0.01 | -0.02 | -0.01 | -0.03 | -0.02 | -0.03 |
| 55 | 6 | 0.01  | -0.01 | 0.01  | 0.00  | 0.00  | 0.00  | 0.00  | 0.00  | 0.00  |
| 56 | 1 | 0.10  | -0.33 | 0.15  | -0.02 | 0.07  | -0.03 | -0.03 | 0.09  | -0.04 |
| 57 | 6 | -0.03 | 0.03  | -0.03 | 0.00  | -0.01 | 0.00  | 0.00  | -0.01 | 0.00  |
| 58 | 1 | -0.08 | 0.05  | -0.09 | 0.02  | -0.01 | 0.03  | 0.04  | -0.02 | 0.05  |
| 59 | 8 | 0.01  | 0.00  | 0.01  | 0.00  | -0.01 | 0.00  | 0.00  | 0.00  | -0.01 |
| 60 | 8 | 0.01  | 0.00  | 0.00  | 0.00  | -0.01 | 0.00  | -0.02 | -0.06 | -0.01 |
| 61 | 8 | 0.00  | 0.00  | 0.02  | 0.00  | -0.01 | 0.00  | 0.00  | 0.00  | 0.00  |
| 62 | 6 | 0.00  | 0.01  | 0.00  | 0.01  | 0.03  | 0.00  | 0.05  | 0.21  | -0.01 |

|    |   |       |       |       |       |       |       |       |       |       |
|----|---|-------|-------|-------|-------|-------|-------|-------|-------|-------|
| 63 | 6 | 0.00  | -0.02 | -0.02 | 0.00  | -0.04 | -0.03 | 0.01  | -0.21 | -0.16 |
| 64 | 6 | -0.01 | 0.00  | 0.01  | -0.01 | 0.00  | 0.01  | -0.05 | -0.01 | 0.06  |
| 65 | 8 | 0.00  | 0.00  | 0.00  | 0.00  | 0.00  | 0.01  | -0.01 | -0.02 | 0.05  |
| 66 | 1 | 0.01  | 0.04  | 0.01  | 0.03  | 0.07  | 0.02  | 0.13  | 0.37  | 0.08  |
| 67 | 6 | 0.01  | 0.00  | -0.01 | 0.01  | 0.00  | -0.01 | 0.06  | 0.03  | -0.06 |
| 68 | 1 | -0.01 | -0.04 | -0.01 | -0.02 | -0.06 | -0.02 | -0.09 | -0.30 | -0.09 |
| 69 | 1 | 0.00  | 0.00  | 0.02  | 0.00  | 0.00  | 0.03  | -0.02 | 0.02  | 0.16  |
| 70 | 1 | -0.01 | 0.01  | 0.01  | -0.02 | 0.03  | 0.02  | -0.10 | 0.13  | 0.09  |
| 71 | 6 | 0.00  | 0.01  | 0.01  | 0.00  | 0.02  | 0.01  | -0.01 | 0.09  | 0.06  |
| 72 | 1 | 0.01  | -0.01 | 0.00  | 0.03  | -0.02 | -0.02 | 0.14  | -0.10 | -0.10 |
| 73 | 1 | -0.02 | -0.02 | 0.01  | -0.02 | -0.04 | 0.01  | -0.12 | -0.20 | 0.04  |
| 74 | 1 | -0.03 | 0.00  | 0.01  | -0.05 | 0.00  | 0.03  | -0.26 | -0.01 | 0.13  |

130

131

132

A

A

A

|                |           |           |           |
|----------------|-----------|-----------|-----------|
| Frequencies -- | 1251.9233 | 1253.6896 | 1266.4233 |
| Red. masses -- | 1.5500    | 2.2410    | 2.4139    |
| Frc consts --  | 1.4313    | 2.0753    | 2.2810    |
| IR Inten --    | 0.6008    | 120.7089  | 6.8831    |
| Raman Activ -- | 8.7087    | 57.0914   | 16.4996   |
| Depolar (P) -- | 0.5609    | 0.3379    | 0.6808    |
| Depolar (U) -- | 0.7187    | 0.5051    | 0.8101    |

| Atom | AN | X     | Y     | Z     | X     | Y     | Z     | X     | Y     | Z     |
|------|----|-------|-------|-------|-------|-------|-------|-------|-------|-------|
| 1    | 6  | 0.00  | 0.00  | 0.01  | 0.07  | -0.07 | -0.13 | 0.02  | 0.20  | -0.07 |
| 2    | 6  | 0.01  | 0.00  | -0.01 | -0.09 | 0.04  | 0.18  | -0.01 | 0.00  | 0.04  |
| 3    | 6  | 0.01  | 0.00  | 0.00  | -0.03 | 0.01  | 0.02  | 0.05  | -0.01 | 0.01  |
| 4    | 6  | 0.00  | 0.01  | 0.00  | 0.00  | 0.00  | 0.00  | -0.01 | 0.00  | -0.01 |
| 5    | 6  | 0.00  | -0.02 | -0.01 | 0.00  | 0.00  | 0.01  | 0.01  | -0.01 | -0.01 |
| 6    | 6  | 0.03  | 0.10  | -0.03 | 0.00  | 0.00  | 0.00  | -0.01 | 0.00  | 0.00  |
| 7    | 8  | 0.00  | 0.00  | 0.00  | 0.02  | 0.01  | -0.03 | 0.00  | -0.01 | -0.01 |
| 8    | 6  | 0.00  | 0.01  | 0.01  | 0.00  | 0.00  | 0.05  | -0.07 | 0.10  | 0.11  |
| 9    | 6  | 0.01  | 0.00  | 0.00  | 0.00  | -0.01 | -0.04 | 0.04  | -0.02 | -0.01 |
| 10   | 1  | -0.01 | 0.06  | 0.02  | 0.08  | -0.22 | -0.12 | 0.06  | 0.51  | 0.07  |
| 11   | 8  | 0.00  | 0.00  | 0.00  | 0.00  | 0.00  | 0.00  | 0.00  | 0.00  | 0.05  |
| 12   | 6  | -0.01 | -0.01 | 0.00  | -0.01 | 0.00  | -0.01 | -0.02 | 0.00  | 0.01  |
| 13   | 1  | 0.04  | 0.02  | -0.02 | -0.05 | -0.01 | -0.01 | 0.05  | 0.04  | -0.01 |
| 14   | 6  | 0.05  | 0.11  | 0.04  | 0.00  | 0.01  | 0.00  | 0.00  | 0.00  | 0.00  |
| 15   | 8  | -0.03 | -0.03 | -0.03 | 0.00  | 0.00  | 0.00  | 0.00  | 0.00  | 0.00  |
| 16   | 6  | 0.00  | 0.00  | 0.00  | 0.00  | 0.00  | -0.02 | 0.03  | -0.03 | -0.04 |
| 17   | 1  | 0.00  | 0.01  | 0.00  | 0.04  | 0.01  | 0.05  | 0.11  | 0.05  | 0.12  |
| 18   | 1  | -0.01 | 0.00  | -0.01 | -0.04 | -0.01 | -0.01 | -0.16 | 0.00  | -0.05 |
| 19   | 1  | 0.00  | 0.00  | 0.01  | 0.00  | 0.02  | 0.05  | -0.02 | 0.04  | 0.15  |
| 20   | 6  | 0.00  | 0.00  | -0.01 | -0.03 | 0.04  | 0.08  | -0.04 | -0.16 | -0.03 |
| 21   | 1  | 0.00  | 0.01  | -0.01 | 0.02  | 0.08  | 0.06  | -0.09 | -0.18 | 0.00  |
| 22   | 6  | 0.00  | 0.00  | 0.00  | -0.02 | 0.02  | 0.05  | -0.01 | -0.06 | 0.03  |
| 23   | 1  | 0.01  | 0.00  | 0.01  | -0.10 | 0.04  | -0.18 | 0.07  | 0.14  | -0.01 |
| 24   | 1  | -0.01 | 0.01  | -0.01 | 0.14  | -0.05 | 0.05  | 0.03  | 0.12  | -0.14 |
| 25   | 1  | 0.00  | 0.01  | 0.01  | 0.04  | -0.09 | -0.10 | 0.04  | -0.05 | 0.11  |
| 26   | 6  | 0.00  | -0.03 | 0.00  | -0.01 | 0.00  | 0.00  | 0.02  | 0.00  | 0.00  |
| 27   | 1  | -0.06 | 0.05  | -0.01 | -0.01 | 0.02  | 0.00  | 0.01  | -0.01 | 0.01  |
| 28   | 1  | 0.13  | -0.18 | 0.00  | -0.04 | 0.03  | 0.00  | 0.02  | -0.02 | -0.01 |
| 29   | 6  | 0.00  | 0.00  | 0.00  | 0.00  | 0.01  | 0.00  | 0.01  | 0.02  | -0.03 |
| 30   | 1  | 0.00  | 0.01  | 0.00  | -0.04 | 0.08  | 0.04  | 0.16  | -0.34 | -0.23 |

|    |   |       |       |       |       |       |       |       |       |       |
|----|---|-------|-------|-------|-------|-------|-------|-------|-------|-------|
| 31 | 1 | 0.01  | -0.03 | -0.01 | 0.02  | -0.06 | -0.04 | 0.02  | 0.00  | 0.02  |
| 32 | 6 | 0.00  | 0.00  | 0.00  | -0.01 | -0.04 | -0.02 | 0.02  | -0.01 | -0.02 |
| 33 | 1 | 0.00  | 0.00  | 0.00  | -0.14 | -0.30 | -0.16 | -0.11 | -0.28 | -0.18 |
| 34 | 6 | 0.00  | 0.00  | 0.00  | 0.04  | 0.00  | -0.06 | 0.00  | 0.00  | -0.02 |
| 35 | 1 | -0.03 | -0.03 | 0.02  | 0.48  | 0.35  | -0.38 | 0.06  | 0.05  | -0.08 |
| 36 | 6 | 0.00  | -0.01 | 0.00  | 0.00  | 0.00  | 0.00  | 0.00  | 0.00  | 0.00  |
| 37 | 1 | -0.01 | 0.01  | -0.02 | 0.00  | 0.00  | -0.01 | -0.02 | 0.00  | -0.01 |
| 38 | 1 | -0.01 | 0.00  | 0.00  | 0.00  | 0.00  | 0.00  | -0.01 | 0.00  | 0.00  |
| 39 | 1 | 0.00  | 0.01  | 0.01  | 0.00  | 0.00  | -0.01 | 0.00  | 0.00  | 0.00  |
| 40 | 6 | -0.02 | 0.00  | 0.01  | 0.03  | 0.01  | 0.00  | -0.04 | -0.03 | -0.01 |
| 41 | 1 | 0.03  | 0.02  | 0.01  | 0.07  | -0.08 | 0.11  | -0.09 | 0.11  | -0.18 |
| 42 | 6 | 0.00  | -0.03 | 0.01  | 0.00  | 0.00  | 0.00  | 0.00  | 0.00  | 0.00  |
| 43 | 1 | -0.02 | 0.04  | -0.01 | 0.00  | 0.01  | -0.01 | 0.00  | 0.00  | 0.01  |
| 44 | 1 | -0.01 | -0.02 | 0.11  | -0.01 | 0.00  | 0.00  | -0.01 | 0.00  | -0.01 |
| 45 | 1 | 0.02  | 0.05  | 0.03  | 0.00  | 0.00  | -0.01 | 0.00  | 0.00  | -0.01 |
| 46 | 6 | 0.02  | 0.01  | -0.04 | 0.00  | 0.00  | -0.01 | 0.00  | 0.00  | 0.01  |
| 47 | 1 | -0.08 | -0.01 | 0.08  | 0.01  | -0.02 | 0.01  | -0.05 | 0.10  | -0.06 |
| 48 | 6 | 0.02  | 0.03  | -0.01 | 0.00  | 0.00  | 0.00  | 0.00  | 0.01  | 0.00  |
| 49 | 1 | -0.24 | -0.18 | -0.23 | -0.02 | -0.01 | -0.01 | 0.01  | 0.01  | 0.01  |
| 50 | 1 | 0.17  | 0.21  | 0.21  | 0.02  | 0.01  | 0.02  | -0.03 | 0.00  | -0.01 |
| 51 | 6 | -0.04 | -0.05 | 0.02  | 0.00  | 0.00  | 0.00  | 0.00  | 0.00  | 0.00  |
| 52 | 1 | -0.17 | -0.19 | -0.16 | -0.02 | 0.00  | 0.00  | 0.00  | -0.01 | -0.02 |
| 53 | 6 | 0.02  | -0.02 | 0.02  | 0.00  | 0.00  | 0.00  | 0.00  | 0.00  | 0.00  |
| 54 | 1 | -0.16 | -0.10 | -0.15 | -0.01 | -0.01 | -0.01 | 0.01  | 0.00  | 0.01  |
| 55 | 6 | 0.00  | -0.02 | 0.00  | 0.00  | 0.00  | 0.00  | 0.00  | 0.00  | 0.00  |
| 56 | 1 | -0.13 | 0.46  | -0.20 | -0.01 | 0.03  | -0.01 | 0.00  | -0.01 | 0.00  |
| 57 | 6 | -0.01 | -0.03 | 0.00  | 0.00  | 0.00  | 0.00  | 0.00  | 0.00  | 0.00  |
| 58 | 1 | 0.28  | -0.10 | 0.29  | 0.02  | -0.01 | 0.02  | -0.02 | 0.01  | -0.03 |
| 59 | 8 | 0.00  | 0.00  | 0.00  | 0.00  | 0.00  | -0.02 | -0.01 | 0.00  | 0.02  |
| 60 | 8 | 0.00  | 0.01  | 0.00  | 0.01  | 0.02  | 0.00  | 0.00  | 0.00  | 0.00  |
| 61 | 8 | 0.00  | 0.00  | 0.02  | 0.00  | 0.00  | 0.00  | 0.00  | -0.01 | 0.00  |
| 62 | 6 | -0.01 | -0.02 | 0.00  | -0.01 | -0.06 | 0.00  | 0.00  | 0.01  | 0.00  |
| 63 | 6 | 0.00  | 0.02  | 0.02  | 0.00  | 0.06  | 0.04  | 0.00  | -0.01 | -0.01 |
| 64 | 6 | 0.01  | 0.00  | -0.01 | 0.01  | 0.01  | -0.01 | 0.00  | 0.00  | 0.00  |
| 65 | 8 | 0.00  | 0.00  | -0.01 | 0.00  | 0.01  | -0.01 | 0.00  | 0.00  | 0.00  |
| 66 | 1 | -0.01 | -0.04 | -0.01 | -0.04 | -0.09 | -0.02 | 0.01  | 0.01  | 0.00  |
| 67 | 6 | -0.01 | 0.00  | 0.01  | -0.02 | -0.01 | 0.01  | 0.00  | 0.00  | 0.00  |
| 68 | 1 | 0.01  | 0.03  | 0.01  | 0.02  | 0.07  | 0.02  | 0.00  | -0.01 | 0.00  |
| 69 | 1 | 0.00  | 0.00  | -0.02 | 0.00  | -0.01 | -0.04 | 0.00  | 0.00  | 0.01  |
| 70 | 1 | 0.01  | -0.01 | -0.01 | 0.02  | -0.03 | -0.02 | 0.00  | 0.00  | 0.00  |
| 71 | 6 | 0.00  | -0.01 | -0.01 | 0.00  | -0.02 | -0.02 | 0.00  | 0.00  | 0.00  |
| 72 | 1 | -0.01 | 0.01  | 0.02  | -0.04 | 0.03  | 0.03  | 0.00  | 0.00  | 0.00  |
| 73 | 1 | 0.01  | 0.02  | 0.00  | 0.03  | 0.05  | -0.01 | 0.00  | -0.01 | 0.00  |
| 74 | 1 | 0.03  | 0.00  | -0.01 | 0.06  | 0.00  | -0.03 | -0.01 | 0.00  | 0.00  |

133

134

135

A

A

A

|                |           |           |           |
|----------------|-----------|-----------|-----------|
| Frequencies -- | 1271.8325 | 1278.0044 | 1287.2529 |
| Red. masses -- | 1.5425    | 1.5726    | 1.9901    |
| Frc consts --  | 1.4700    | 1.5133    | 1.9429    |
| IR Inten --    | 4.2401    | 2.9774    | 7.0952    |
| Raman Activ -- | 20.9966   | 29.5326   | 7.5823    |
| Depolar (P) -- | 0.1960    | 0.3383    | 0.1005    |

|      |    | Depolar (U) -- |       |       | 0.3278 |       |       | 0.5055 |       |       | 0.1827 |   |   |
|------|----|----------------|-------|-------|--------|-------|-------|--------|-------|-------|--------|---|---|
| Atom | AN | X              | Y     | Z     | X      | Y     | Z     | X      | Y     | Z     | X      | Y | Z |
| 1    | 6  | 0.01           | -0.07 | 0.03  | 0.00   | -0.01 | 0.01  | 0.00   | -0.09 | 0.08  |        |   |   |
| 2    | 6  | 0.00           | 0.00  | 0.00  | 0.00   | 0.00  | 0.00  | 0.01   | 0.00  | -0.03 |        |   |   |
| 3    | 6  | -0.01          | 0.03  | 0.01  | -0.01  | 0.01  | 0.00  | -0.04  | 0.03  | 0.00  |        |   |   |
| 4    | 6  | -0.01          | -0.01 | -0.02 | 0.00   | -0.01 | -0.01 | 0.08   | -0.05 | -0.02 |        |   |   |
| 5    | 6  | 0.07           | -0.06 | -0.04 | 0.02   | -0.01 | -0.01 | -0.05  | 0.02  | -0.02 |        |   |   |
| 6    | 6  | -0.02          | -0.04 | -0.03 | -0.02  | -0.04 | 0.00  | 0.02   | 0.06  | 0.06  |        |   |   |
| 7    | 8  | 0.00           | 0.00  | 0.00  | 0.00   | 0.00  | 0.00  | 0.00   | 0.01  | 0.01  |        |   |   |
| 8    | 6  | 0.03           | -0.01 | 0.03  | 0.00   | 0.00  | 0.01  | -0.08  | 0.01  | 0.07  |        |   |   |
| 9    | 6  | 0.03           | -0.03 | -0.03 | 0.01   | -0.01 | -0.01 | 0.04   | -0.05 | -0.04 |        |   |   |
| 10   | 1  | 0.02           | 0.23  | 0.02  | 0.01   | 0.07  | 0.00  | -0.02  | 0.30  | 0.05  |        |   |   |
| 11   | 8  | -0.01          | 0.00  | 0.01  | 0.00   | 0.00  | 0.00  | 0.00   | -0.01 | 0.02  |        |   |   |
| 12   | 6  | -0.07          | 0.00  | 0.02  | -0.02  | 0.00  | 0.01  | -0.10  | 0.02  | 0.03  |        |   |   |
| 13   | 1  | 0.35           | 0.08  | -0.02 | 0.09   | 0.02  | 0.00  | 0.39   | 0.12  | -0.03 |        |   |   |
| 14   | 6  | 0.02           | 0.00  | 0.03  | -0.09  | 0.01  | -0.11 | -0.01  | -0.01 | 0.00  |        |   |   |
| 15   | 8  | 0.00           | 0.02  | -0.01 | 0.02   | -0.07 | 0.03  | 0.00   | 0.00  | 0.00  |        |   |   |
| 16   | 6  | -0.01          | 0.00  | -0.01 | 0.00   | 0.00  | 0.00  | 0.03   | 0.00  | -0.02 |        |   |   |
| 17   | 1  | 0.00           | 0.01  | 0.00  | 0.00   | 0.00  | 0.00  | 0.08   | 0.00  | 0.06  |        |   |   |
| 18   | 1  | -0.02          | 0.00  | -0.01 | -0.01  | 0.00  | 0.00  | -0.09  | -0.05 | 0.02  |        |   |   |
| 19   | 1  | -0.01          | 0.00  | 0.01  | 0.00   | 0.00  | 0.00  | -0.07  | 0.03  | 0.07  |        |   |   |
| 20   | 6  | -0.01          | 0.04  | -0.02 | 0.00   | 0.01  | -0.01 | 0.05   | 0.06  | -0.07 |        |   |   |
| 21   | 1  | -0.02          | 0.20  | 0.04  | -0.01  | 0.05  | 0.01  | 0.02   | 0.31  | 0.03  |        |   |   |
| 22   | 6  | 0.00           | 0.02  | -0.01 | 0.00   | 0.00  | 0.00  | 0.00   | 0.02  | -0.02 |        |   |   |
| 23   | 1  | -0.03          | -0.03 | -0.02 | -0.01  | 0.00  | 0.00  | -0.02  | -0.05 | 0.01  |        |   |   |
| 24   | 1  | 0.00           | -0.02 | 0.02  | 0.00   | 0.00  | 0.00  | -0.05  | -0.01 | 0.02  |        |   |   |
| 25   | 1  | -0.01          | 0.00  | -0.04 | 0.00   | 0.00  | -0.01 | -0.02  | 0.02  | -0.04 |        |   |   |
| 26   | 6  | 0.01           | 0.02  | 0.01  | 0.00   | 0.02  | 0.00  | 0.00   | -0.03 | -0.01 |        |   |   |
| 27   | 1  | -0.10          | 0.16  | 0.00  | 0.00   | 0.01  | 0.01  | 0.16   | -0.21 | -0.01 |        |   |   |
| 28   | 1  | 0.14           | -0.17 | -0.01 | -0.01  | 0.01  | -0.01 | -0.20  | 0.26  | 0.02  |        |   |   |
| 29   | 6  | -0.01          | 0.00  | 0.00  | 0.00   | 0.00  | 0.00  | 0.00   | 0.02  | 0.00  |        |   |   |
| 30   | 1  | -0.04          | 0.09  | 0.04  | 0.00   | 0.01  | 0.00  | 0.07   | -0.20 | -0.11 |        |   |   |
| 31   | 1  | 0.05           | -0.13 | -0.05 | 0.01   | -0.03 | -0.01 | 0.02   | -0.03 | -0.02 |        |   |   |
| 32   | 6  | 0.00           | 0.00  | 0.00  | 0.00   | 0.00  | 0.00  | 0.01   | -0.01 | -0.02 |        |   |   |
| 33   | 1  | -0.01          | -0.03 | -0.02 | -0.01  | -0.01 | -0.01 | -0.07  | -0.15 | -0.11 |        |   |   |
| 34   | 6  | 0.00           | 0.00  | 0.00  | 0.00   | 0.00  | 0.00  | 0.01   | 0.01  | 0.00  |        |   |   |
| 35   | 1  | -0.02          | -0.03 | 0.02  | 0.00   | -0.01 | 0.00  | 0.01   | 0.03  | -0.01 |        |   |   |
| 36   | 6  | 0.00           | 0.00  | 0.01  | 0.00   | 0.00  | 0.00  | -0.02  | 0.01  | 0.01  |        |   |   |
| 37   | 1  | -0.02          | 0.01  | -0.02 | 0.00   | 0.00  | 0.00  | 0.05   | 0.02  | 0.04  |        |   |   |
| 38   | 1  | -0.02          | -0.01 | -0.04 | 0.00   | -0.01 | -0.01 | 0.05   | -0.05 | -0.05 |        |   |   |
| 39   | 1  | 0.01           | -0.02 | -0.04 | 0.00   | -0.01 | -0.01 | -0.01  | -0.03 | -0.08 |        |   |   |
| 40   | 6  | -0.01          | -0.01 | 0.01  | 0.00   | -0.01 | 0.00  | 0.01   | 0.02  | -0.03 |        |   |   |
| 41   | 1  | -0.02          | 0.01  | -0.01 | -0.02  | 0.00  | -0.02 | 0.04   | -0.14 | 0.15  |        |   |   |
| 42   | 6  | 0.01           | 0.02  | 0.01  | 0.00   | 0.01  | 0.00  | -0.01  | -0.03 | -0.02 |        |   |   |
| 43   | 1  | 0.01           | -0.05 | 0.05  | 0.01   | -0.02 | 0.01  | -0.01  | 0.06  | -0.06 |        |   |   |
| 44   | 1  | -0.02          | 0.01  | -0.07 | 0.00   | 0.01  | -0.04 | 0.03   | -0.02 | 0.09  |        |   |   |
| 45   | 1  | -0.03          | -0.07 | -0.01 | -0.01  | -0.02 | -0.02 | 0.04   | 0.09  | 0.01  |        |   |   |
| 46   | 6  | 0.03           | 0.03  | 0.08  | -0.02  | 0.01  | 0.03  | -0.03  | 0.00  | -0.04 |        |   |   |
| 47   | 1  | -0.29          | 0.55  | -0.34 | -0.02  | 0.10  | -0.10 | 0.10   | -0.23 | 0.16  |        |   |   |
| 48   | 6  | -0.01          | 0.03  | -0.01 | 0.00   | 0.00  | 0.00  | 0.03   | 0.00  | 0.02  |        |   |   |
| 49   | 1  | 0.02           | 0.07  | 0.02  | 0.10   | 0.05  | 0.10  | -0.02  | -0.06 | -0.03 |        |   |   |
| 50   | 1  | -0.08          | 0.05  | 0.00  | -0.13  | -0.10 | -0.13 | -0.01  | -0.06 | -0.05 |        |   |   |

|    |   |       |       |       |       |       |       |       |       |       |
|----|---|-------|-------|-------|-------|-------|-------|-------|-------|-------|
| 51 | 6 | -0.01 | 0.00  | -0.01 | 0.06  | 0.01  | 0.04  | 0.02  | -0.01 | 0.00  |
| 52 | 1 | 0.01  | -0.13 | -0.11 | 0.27  | 0.06  | 0.19  | -0.17 | 0.08  | -0.01 |
| 53 | 6 | 0.00  | -0.01 | 0.00  | 0.01  | 0.06  | 0.00  | -0.01 | 0.00  | -0.01 |
| 54 | 1 | 0.03  | -0.01 | 0.02  | -0.12 | 0.03  | -0.12 | 0.03  | 0.02  | 0.04  |
| 55 | 6 | -0.01 | 0.00  | -0.01 | 0.03  | 0.00  | 0.03  | 0.00  | 0.01  | 0.00  |
| 56 | 1 | -0.01 | -0.01 | -0.01 | 0.01  | 0.10  | -0.01 | 0.02  | -0.07 | 0.03  |
| 57 | 6 | 0.01  | -0.01 | 0.01  | -0.05 | 0.03  | -0.06 | 0.00  | 0.00  | 0.00  |
| 58 | 1 | -0.13 | 0.03  | -0.14 | 0.57  | -0.12 | 0.60  | -0.03 | 0.00  | -0.02 |
| 59 | 8 | 0.01  | 0.00  | 0.00  | 0.00  | 0.00  | 0.00  | 0.00  | -0.01 | 0.00  |
| 60 | 8 | 0.00  | 0.00  | 0.00  | 0.00  | 0.00  | 0.00  | 0.01  | 0.00  | -0.01 |
| 61 | 8 | -0.02 | -0.03 | 0.00  | 0.00  | -0.01 | 0.00  | 0.01  | 0.01  | 0.01  |
| 62 | 6 | 0.00  | 0.00  | 0.00  | 0.00  | 0.00  | 0.00  | 0.00  | -0.01 | 0.00  |
| 63 | 6 | 0.00  | 0.00  | 0.00  | 0.00  | 0.00  | 0.00  | 0.00  | 0.01  | 0.00  |
| 64 | 6 | 0.00  | 0.00  | 0.00  | 0.00  | 0.00  | 0.00  | 0.00  | 0.00  | 0.00  |
| 65 | 8 | 0.00  | 0.00  | 0.00  | 0.00  | 0.00  | 0.00  | 0.00  | 0.00  | 0.00  |
| 66 | 1 | 0.00  | 0.00  | 0.00  | 0.00  | 0.00  | 0.00  | -0.01 | -0.01 | 0.00  |
| 67 | 6 | 0.00  | 0.00  | 0.00  | 0.00  | 0.00  | 0.00  | 0.00  | 0.00  | 0.00  |
| 68 | 1 | 0.00  | 0.00  | 0.00  | 0.00  | 0.00  | 0.00  | 0.00  | 0.01  | 0.00  |
| 69 | 1 | 0.00  | 0.00  | 0.00  | 0.00  | 0.00  | 0.00  | 0.00  | 0.00  | 0.00  |
| 70 | 1 | 0.00  | 0.00  | 0.00  | 0.00  | 0.00  | 0.00  | 0.00  | 0.00  | 0.00  |
| 71 | 6 | 0.00  | 0.00  | 0.00  | 0.00  | 0.00  | 0.00  | 0.00  | 0.00  | 0.00  |
| 72 | 1 | 0.00  | 0.00  | 0.00  | 0.00  | 0.00  | 0.00  | 0.00  | 0.00  | 0.02  |
| 73 | 1 | 0.02  | 0.01  | -0.01 | 0.00  | 0.00  | 0.00  | -0.01 | 0.00  | 0.00  |
| 74 | 1 | 0.01  | 0.00  | 0.00  | 0.00  | 0.00  | 0.00  | 0.01  | 0.00  | 0.01  |

136

137

138

A

A

A

|                |           |           |           |
|----------------|-----------|-----------|-----------|
| Frequencies -- | 1287.9090 | 1297.4084 | 1301.7097 |
| Red. masses -- | 2.3305    | 1.7024    | 1.7359    |
| Frc consts --  | 2.2776    | 1.6884    | 1.7330    |
| IR Inten --    | 1.5765    | 1.3878    | 7.1261    |
| Raman Activ -- | 14.1367   | 21.5171   | 6.9678    |
| Depolar (P) -- | 0.5582    | 0.7160    | 0.5342    |
| Depolar (U) -- | 0.7165    | 0.8345    | 0.6964    |

| Atom | AN | X     | Y     | Z     | X     | Y     | Z     | X     | Y     | Z     |
|------|----|-------|-------|-------|-------|-------|-------|-------|-------|-------|
| 1    | 6  | 0.06  | 0.08  | -0.06 | -0.01 | 0.01  | -0.01 | 0.00  | 0.00  | 0.00  |
| 2    | 6  | -0.01 | 0.01  | 0.02  | 0.00  | 0.00  | 0.00  | 0.00  | 0.00  | 0.00  |
| 3    | 6  | -0.02 | 0.01  | 0.01  | 0.00  | -0.01 | -0.01 | -0.01 | -0.02 | 0.00  |
| 4    | 6  | 0.05  | -0.02 | -0.01 | -0.02 | 0.04  | 0.03  | -0.02 | -0.01 | -0.01 |
| 5    | 6  | -0.03 | 0.01  | -0.01 | 0.02  | -0.09 | -0.09 | 0.05  | 0.02  | 0.03  |
| 6    | 6  | 0.01  | 0.04  | 0.04  | 0.01  | 0.09  | 0.10  | 0.01  | -0.04 | -0.08 |
| 7    | 8  | 0.00  | -0.01 | -0.01 | 0.00  | 0.00  | 0.00  | 0.00  | 0.00  | 0.00  |
| 8    | 6  | 0.22  | -0.02 | -0.05 | -0.01 | 0.00  | -0.01 | 0.00  | 0.00  | 0.01  |
| 9    | 6  | 0.03  | -0.05 | -0.05 | -0.02 | 0.03  | 0.03  | 0.00  | -0.01 | -0.01 |
| 10   | 1  | 0.09  | 0.36  | -0.02 | -0.01 | -0.18 | -0.01 | 0.00  | 0.06  | 0.00  |
| 11   | 8  | -0.01 | 0.02  | 0.01  | 0.00  | 0.00  | -0.01 | 0.00  | 0.00  | 0.00  |
| 12   | 6  | -0.06 | 0.01  | 0.01  | 0.04  | -0.02 | -0.01 | 0.00  | 0.01  | 0.00  |
| 13   | 1  | 0.21  | 0.07  | -0.03 | -0.15 | -0.03 | -0.02 | 0.03  | -0.01 | 0.02  |
| 14   | 6  | -0.01 | 0.00  | 0.00  | -0.05 | -0.01 | -0.02 | -0.03 | -0.01 | -0.04 |
| 15   | 8  | 0.00  | 0.00  | 0.00  | 0.01  | -0.01 | 0.01  | 0.01  | -0.01 | 0.01  |
| 16   | 6  | -0.06 | 0.00  | 0.02  | 0.00  | 0.00  | 0.00  | 0.00  | 0.00  | 0.00  |
| 17   | 1  | -0.13 | 0.01  | -0.10 | 0.00  | 0.00  | 0.00  | 0.00  | 0.00  | 0.00  |
| 18   | 1  | 0.08  | 0.08  | -0.06 | 0.01  | 0.00  | 0.00  | -0.01 | 0.00  | 0.00  |

|    |   |       |       |       |       |       |       |        |       |       |
|----|---|-------|-------|-------|-------|-------|-------|--------|-------|-------|
| 19 | 1 | 0.09  | -0.03 | -0.11 | 0.01  | 0.00  | 0.00  | 0.00   | 0.00  | 0.00  |
| 20 | 6 | -0.13 | -0.05 | 0.06  | 0.01  | -0.01 | 0.01  | 0.00   | 0.00  | 0.00  |
| 21 | 1 | -0.24 | 0.03  | 0.18  | 0.05  | -0.13 | -0.06 | -0.01  | 0.04  | 0.02  |
| 22 | 6 | -0.01 | -0.03 | 0.03  | 0.00  | 0.00  | 0.00  | 0.00   | 0.00  | 0.00  |
| 23 | 1 | 0.01  | 0.09  | -0.05 | 0.01  | 0.00  | 0.01  | 0.00   | 0.00  | 0.00  |
| 24 | 1 | 0.07  | 0.05  | -0.07 | 0.00  | -0.01 | 0.01  | 0.00   | 0.00  | 0.00  |
| 25 | 1 | 0.03  | -0.05 | 0.02  | 0.00  | 0.01  | 0.01  | 0.00   | 0.00  | 0.00  |
| 26 | 6 | 0.00  | -0.02 | 0.00  | 0.00  | -0.03 | -0.01 | -0.01  | 0.02  | 0.02  |
| 27 | 1 | 0.08  | -0.11 | 0.00  | 0.17  | -0.25 | 0.00  | -0.13  | 0.20  | -0.01 |
| 28 | 1 | -0.12 | 0.16  | 0.01  | -0.17 | 0.24  | 0.02  | 0.18   | -0.25 | -0.01 |
| 29 | 6 | -0.02 | -0.02 | 0.00  | 0.01  | 0.00  | 0.00  | 0.00   | 0.00  | 0.00  |
| 30 | 1 | -0.11 | 0.38  | 0.16  | -0.01 | 0.02  | 0.02  | 0.01   | -0.02 | -0.01 |
| 31 | 1 | 0.08  | -0.25 | -0.06 | -0.02 | 0.06  | 0.02  | 0.01   | -0.01 | -0.01 |
| 32 | 6 | -0.02 | 0.04  | 0.03  | 0.00  | 0.00  | 0.00  | 0.00   | 0.00  | 0.00  |
| 33 | 1 | 0.10  | 0.19  | 0.15  | 0.01  | 0.02  | 0.01  | 0.00   | -0.01 | -0.01 |
| 34 | 6 | -0.01 | -0.02 | -0.02 | 0.00  | 0.00  | 0.00  | 0.00   | 0.00  | 0.00  |
| 35 | 1 | -0.11 | -0.15 | 0.09  | 0.01  | 0.02  | -0.01 | 0.00   | 0.00  | 0.00  |
| 36 | 6 | -0.01 | 0.01  | 0.01  | 0.01  | -0.01 | 0.00  | 0.00   | 0.00  | 0.00  |
| 37 | 1 | 0.02  | 0.02  | 0.01  | -0.04 | 0.01  | -0.06 | -0.01  | -0.01 | 0.02  |
| 38 | 1 | 0.02  | -0.03 | -0.03 | -0.04 | 0.02  | 0.00  | -0.01  | 0.01  | 0.00  |
| 39 | 1 | 0.00  | -0.01 | -0.06 | 0.01  | 0.02  | 0.02  | 0.00   | -0.01 | 0.01  |
| 40 | 6 | 0.00  | 0.01  | -0.02 | 0.01  | 0.01  | -0.02 | 0.00   | 0.00  | 0.03  |
| 41 | 1 | 0.03  | -0.07 | 0.08  | -0.01 | -0.04 | 0.02  | 0.10   | 0.04  | 0.03  |
| 42 | 6 | 0.00  | -0.02 | -0.01 | 0.00  | -0.03 | -0.03 | 0.00   | 0.02  | 0.03  |
| 43 | 1 | 0.00  | 0.04  | -0.04 | -0.04 | 0.08  | -0.05 | 0.02   | -0.06 | 0.04  |
| 44 | 1 | 0.01  | -0.01 | 0.05  | 0.03  | -0.02 | 0.12  | -0.01  | 0.01  | -0.07 |
| 45 | 1 | 0.02  | 0.06  | 0.00  | 0.06  | 0.13  | 0.03  | -0.04  | -0.08 | 0.00  |
| 46 | 6 | -0.02 | 0.00  | -0.02 | 0.00  | 0.01  | 0.03  | -0.09  | 0.00  | -0.06 |
| 47 | 1 | 0.05  | -0.13 | 0.09  | -0.33 | 0.37  | -0.18 | 0.12   | -0.22 | 0.05  |
| 48 | 6 | 0.02  | 0.00  | 0.01  | 0.06  | 0.06  | 0.03  | 0.13   | 0.06  | 0.08  |
| 49 | 1 | -0.02 | -0.05 | -0.02 | -0.17 | -0.15 | -0.16 | -0.34  | -0.35 | -0.33 |
| 50 | 1 | -0.02 | -0.04 | -0.04 | -0.22 | -0.08 | -0.17 | -0.27  | -0.19 | -0.25 |
| 51 | 6 | 0.01  | 0.00  | 0.00  | 0.04  | -0.01 | 0.02  | -0.03  | 0.04  | 0.04  |
| 52 | 1 | -0.10 | 0.04  | -0.01 | -0.28 | -0.10 | -0.20 | 0.01   | -0.21 | -0.17 |
| 53 | 6 | 0.00  | 0.00  | -0.01 | -0.02 | 0.00  | -0.02 | -0.03  | -0.01 | -0.03 |
| 54 | 1 | 0.02  | 0.01  | 0.02  | 0.07  | 0.04  | 0.08  | 0.12   | 0.05  | 0.11  |
| 55 | 6 | 0.00  | 0.01  | 0.00  | 0.01  | 0.03  | 0.01  | 0.01   | 0.04  | 0.00  |
| 56 | 1 | 0.02  | -0.04 | 0.02  | 0.06  | -0.15 | 0.09  | 0.07   | -0.20 | 0.11  |
| 57 | 6 | 0.00  | 0.00  | 0.00  | 0.00  | -0.01 | 0.00  | 0.00   | -0.01 | 0.00  |
| 58 | 1 | -0.01 | 0.00  | -0.01 | 0.02  | -0.01 | 0.03  | 0.00   | -0.02 | -0.01 |
| 59 | 8 | 0.00  | -0.01 | 0.00  | 0.00  | 0.00  | 0.00  | 0.00   | 0.01  | -0.01 |
| 60 | 8 | 0.01  | 0.00  | 0.00  | 0.00  | 0.01  | 0.00  | 0.00</ |       |       |

|                |    |       |           |       |       |           |       |       |           |       |      |
|----------------|----|-------|-----------|-------|-------|-----------|-------|-------|-----------|-------|------|
| 71             | 6  | 0.00  | 0.00      | 0.00  | 0.00  | 0.00      | 0.00  | 0.00  | 0.00      | 0.00  | 0.00 |
| 72             | 1  | 0.00  | 0.00      | 0.01  | 0.00  | 0.00      | -0.01 | 0.00  | 0.00      | 0.00  | 0.00 |
| 73             | 1  | -0.01 | 0.00      | 0.00  | 0.01  | 0.01      | 0.00  | -0.01 | -0.01     | 0.00  | 0.00 |
| 74             | 1  | 0.00  | 0.00      | 0.00  | 0.00  | 0.00      | 0.00  | 0.00  | 0.00      | 0.00  | 0.00 |
|                |    |       | 139       |       |       | 140       |       |       | 141       |       |      |
|                |    |       | A         |       |       | A         |       |       | A         |       |      |
| Frequencies -- |    |       | 1322.4392 |       |       | 1338.9711 |       |       | 1343.2284 |       |      |
| Red. masses -- |    |       | 2.0573    |       |       | 1.4079    |       |       | 1.3888    |       |      |
| Frc consts --  |    |       | 2.1198    |       |       | 1.4872    |       |       | 1.4763    |       |      |
| IR Inten --    |    |       | 7.9781    |       |       | 2.6576    |       |       | 0.0396    |       |      |
| Raman Activ -- |    |       | 13.8929   |       |       | 14.3604   |       |       | 7.8405    |       |      |
| Depolar (P) -- |    |       | 0.6563    |       |       | 0.2962    |       |       | 0.7464    |       |      |
| Depolar (U) -- |    |       | 0.7925    |       |       | 0.4570    |       |       | 0.8548    |       |      |
| Atom           | AN | X     | Y         | Z     | X     | Y         | Z     | X     | Y         | Z     |      |
| 1              | 6  | 0.03  | 0.06      | 0.02  | 0.00  | 0.00      | 0.00  | -0.01 | 0.02      | -0.02 |      |
| 2              | 6  | 0.00  | 0.01      | -0.01 | 0.00  | 0.00      | 0.00  | 0.00  | 0.00      | 0.01  |      |
| 3              | 6  | -0.14 | -0.17     | -0.04 | -0.02 | 0.00      | 0.00  | 0.00  | 0.02      | 0.01  |      |
| 4              | 6  | 0.05  | 0.05      | 0.01  | 0.01  | 0.00      | 0.01  | 0.02  | -0.03     | -0.04 |      |
| 5              | 6  | -0.02 | -0.03     | -0.02 | -0.01 | 0.01      | -0.01 | 0.01  | 0.01      | 0.01  |      |
| 6              | 6  | 0.00  | -0.02     | 0.01  | 0.00  | -0.08     | 0.11  | -0.01 | -0.01     | 0.01  |      |
| 7              | 8  | -0.01 | -0.02     | 0.00  | 0.00  | 0.00      | 0.00  | 0.00  | 0.00      | 0.00  |      |
| 8              | 6  | -0.01 | 0.00      | 0.00  | 0.00  | 0.00      | 0.00  | -0.02 | 0.02      | 0.00  |      |
| 9              | 6  | 0.00  | 0.01      | 0.02  | 0.00  | -0.01     | -0.01 | 0.00  | 0.08      | 0.09  |      |
| 10             | 1  | 0.01  | 0.04      | 0.02  | -0.01 | 0.04      | 0.00  | 0.14  | -0.27     | -0.03 |      |
| 11             | 8  | 0.00  | 0.00      | 0.00  | 0.00  | 0.00      | 0.00  | 0.01  | 0.00      | -0.03 |      |
| 12             | 6  | -0.01 | -0.01     | 0.01  | 0.01  | 0.01      | 0.00  | -0.08 | -0.05     | 0.01  |      |
| 13             | 1  | 0.01  | 0.05      | -0.06 | -0.06 | -0.03     | 0.03  | 0.57  | 0.28      | -0.27 |      |
| 14             | 6  | 0.01  | 0.00      | 0.00  | 0.02  | -0.01     | 0.00  | 0.00  | 0.00      | 0.00  |      |
| 15             | 8  | 0.00  | 0.00      | 0.00  | 0.00  | 0.00      | 0.00  | 0.00  | 0.00      | 0.00  |      |
| 16             | 6  | 0.00  | 0.00      | 0.00  | 0.00  | 0.00      | 0.00  | 0.00  | -0.01     | 0.00  |      |
| 17             | 1  | 0.01  | 0.00      | 0.00  | 0.00  | 0.00      | 0.00  | -0.01 | 0.03      | 0.00  |      |
| 18             | 1  | -0.01 | 0.00      | 0.00  | 0.00  | 0.00      | 0.00  | 0.01  | 0.01      | -0.01 |      |
| 19             | 1  | -0.01 | 0.00      | 0.01  | 0.00  | 0.00      | 0.00  | 0.00  | 0.00      | 0.02  |      |
| 20             | 6  | 0.01  | -0.02     | -0.02 | 0.00  | 0.00      | 0.00  | -0.01 | -0.02     | 0.00  |      |
| 21             | 1  | 0.00  | -0.14     | -0.05 | -0.02 | 0.05      | 0.03  | 0.14  | -0.38     | -0.23 |      |
| 22             | 6  | 0.00  | -0.01     | -0.01 | 0.00  | 0.00      | 0.00  | 0.00  | 0.00      | 0.00  |      |
| 23             | 1  | 0.03  | 0.01      | 0.05  | 0.00  | 0.00      | 0.00  | 0.01  | -0.01     | 0.03  |      |
| 24             | 1  | 0.00  | 0.00      | -0.02 | 0.00  | 0.00      | 0.00  | 0.01  | -0.02     | 0.02  |      |
| 25             | 1  | 0.03  | 0.00      | 0.06  | 0.00  | 0.00      | 0.00  | 0.02  | 0.00      | 0.02  |      |
| 26             | 6  | -0.03 | 0.02      | 0.01  | -0.03 | 0.04      | -0.02 | 0.01  | 0.00      | 0.00  |      |
| 27             | 1  | -0.06 | 0.12      | -0.01 | 0.16  | -0.25     | 0.02  | 0.00  | 0.00      | 0.00  |      |
| 28             | 1  | -0.01 | 0.03      | 0.03  | -0.07 | 0.13      | 0.01  | -0.03 | 0.03      | 0.00  |      |
| 29             | 6  | 0.00  | 0.01      | 0.00  | 0.00  | 0.01      | 0.00  | 0.02  | -0.04     | -0.01 |      |
| 30             | 1  | 0.03  | -0.07     | -0.04 | 0.01  | -0.03     | -0.02 | -0.08 | 0.21      | 0.12  |      |
| 31             | 1  | 0.01  | -0.01     | -0.01 | 0.01  | -0.03     | -0.01 | -0.09 | 0.22      | 0.10  |      |
| 32             | 6  | 0.00  | 0.00      | 0.00  | 0.00  | 0.00      | 0.00  | 0.00  | 0.00      | 0.00  |      |
| 33             | 1  | 0.00  | 0.00      | -0.01 | 0.00  | 0.00      | 0.00  | -0.01 | -0.03     | -0.01 |      |
| 34             | 6  | 0.00  | 0.00      | 0.01  | 0.00  | 0.00      | 0.00  | 0.00  | 0.00      | 0.00  |      |
| 35             | 1  | 0.00  | 0.00      | 0.00  | 0.00  | 0.00      | 0.00  | -0.01 | 0.00      | 0.00  |      |
| 36             | 6  | -0.01 | -0.01     | 0.00  | 0.00  | 0.00      | 0.00  | 0.00  | 0.01      | 0.02  |      |
| 37             | 1  | 0.05  | 0.01      | 0.01  | 0.00  | -0.01     | 0.01  | 0.01  | 0.04      | -0.03 |      |
| 38             | 1  | 0.03  | 0.00      | 0.06  | 0.00  | 0.01      | 0.01  | 0.02  | -0.05     | -0.07 |      |



|    |   |       |       |       |       |       |       |       |       |       |
|----|---|-------|-------|-------|-------|-------|-------|-------|-------|-------|
| 39 | 1 | -0.01 | 0.03  | 0.01  | 0.00  | 0.00  | 0.01  | 0.00  | -0.03 | -0.06 |
| 40 | 6 | 0.08  | 0.07  | 0.09  | 0.03  | -0.01 | -0.01 | -0.01 | 0.00  | -0.01 |
| 41 | 1 | 0.76  | -0.03 | 0.48  | -0.08 | -0.01 | -0.05 | -0.03 | -0.02 | 0.00  |
| 42 | 6 | 0.00  | 0.01  | 0.00  | -0.02 | 0.01  | -0.02 | 0.00  | 0.00  | 0.00  |
| 43 | 1 | 0.01  | -0.02 | 0.00  | 0.08  | 0.00  | -0.10 | 0.01  | 0.00  | -0.01 |
| 44 | 1 | 0.01  | 0.01  | -0.01 | 0.09  | 0.02  | -0.08 | 0.01  | 0.00  | -0.03 |
| 45 | 1 | -0.01 | -0.01 | 0.00  | -0.01 | 0.02  | -0.02 | 0.00  | 0.00  | -0.02 |
| 46 | 6 | 0.02  | 0.01  | 0.02  | 0.01  | 0.01  | -0.01 | -0.01 | 0.00  | -0.01 |
| 47 | 1 | -0.07 | 0.09  | -0.02 | 0.00  | -0.01 | 0.04  | 0.04  | -0.05 | 0.03  |
| 48 | 6 | -0.01 | 0.00  | -0.01 | 0.02  | 0.01  | -0.03 | 0.01  | 0.00  | 0.00  |
| 49 | 1 | 0.05  | 0.05  | 0.04  | -0.08 | -0.09 | -0.10 | -0.01 | -0.02 | -0.01 |
| 50 | 1 | 0.00  | 0.02  | 0.02  | 0.08  | 0.14  | 0.14  | 0.01  | 0.00  | 0.01  |
| 51 | 6 | 0.00  | 0.00  | -0.01 | -0.07 | 0.06  | 0.02  | -0.01 | 0.01  | 0.00  |
| 52 | 1 | 0.06  | 0.00  | 0.02  | 0.58  | -0.57 | -0.24 | 0.10  | -0.07 | -0.02 |
| 53 | 6 | 0.01  | 0.00  | 0.01  | 0.01  | 0.01  | 0.01  | 0.00  | 0.00  | 0.00  |
| 54 | 1 | -0.02 | -0.01 | -0.02 | -0.03 | -0.01 | -0.04 | -0.01 | 0.00  | -0.01 |
| 55 | 6 | 0.00  | -0.01 | 0.00  | 0.00  | -0.01 | 0.00  | 0.00  | 0.00  | 0.00  |
| 56 | 1 | -0.02 | 0.04  | -0.02 | -0.02 | 0.06  | -0.03 | 0.00  | 0.01  | -0.01 |
| 57 | 6 | 0.00  | 0.00  | 0.00  | 0.00  | 0.01  | 0.00  | 0.00  | 0.00  | 0.00  |
| 58 | 1 | 0.00  | 0.01  | 0.00  | 0.00  | 0.01  | -0.01 | 0.00  | 0.00  | -0.01 |
| 59 | 8 | 0.00  | 0.02  | -0.09 | 0.00  | 0.01  | 0.00  | 0.00  | -0.01 | 0.00  |
| 60 | 8 | 0.00  | 0.00  | 0.00  | 0.00  | 0.00  | 0.00  | 0.01  | 0.01  | 0.01  |
| 61 | 8 | 0.00  | 0.00  | 0.00  | 0.00  | 0.00  | 0.00  | 0.00  | 0.00  | 0.00  |
| 62 | 6 | 0.00  | 0.00  | 0.00  | 0.00  | 0.00  | 0.00  | 0.00  | 0.00  | 0.00  |
| 63 | 6 | 0.00  | 0.00  | 0.00  | 0.00  | 0.00  | 0.00  | 0.00  | 0.00  | 0.00  |
| 64 | 6 | 0.00  | 0.00  | 0.00  | 0.00  | 0.00  | 0.00  | 0.00  | 0.00  | 0.00  |
| 65 | 8 | 0.00  | 0.00  | 0.00  | 0.00  | 0.00  | 0.00  | 0.00  | 0.00  | 0.00  |
| 66 | 1 | 0.00  | 0.00  | 0.00  | 0.00  | 0.00  | 0.00  | -0.01 | -0.02 | 0.00  |
| 67 | 6 | 0.00  | 0.00  | 0.00  | 0.00  | 0.00  | 0.00  | 0.00  | 0.00  | 0.00  |
| 68 | 1 | 0.00  | 0.00  | 0.00  | 0.00  | 0.00  | 0.00  | 0.00  | 0.00  | 0.00  |
| 69 | 1 | 0.00  | 0.00  | 0.00  | 0.00  | 0.00  | 0.00  | 0.00  | 0.00  | 0.00  |
| 70 | 1 | 0.00  | 0.00  | 0.00  | 0.00  | 0.00  | 0.00  | 0.00  | 0.00  | 0.00  |
| 71 | 6 | 0.00  | 0.00  | 0.00  | 0.00  | 0.00  | 0.00  | 0.00  | 0.00  | 0.00  |
| 72 | 1 | 0.00  | 0.00  | 0.00  | 0.00  | 0.00  | 0.00  | 0.01  | -0.01 | 0.03  |
| 73 | 1 | 0.00  | 0.00  | 0.00  | 0.00  | 0.00  | 0.00  | -0.02 | 0.00  | 0.01  |
| 74 | 1 | 0.00  | 0.00  | 0.00  | 0.00  | 0.00  | 0.00  | 0.01  | 0.00  | 0.02  |

142

143

144

A

A

A

|                |           |           |           |
|----------------|-----------|-----------|-----------|
| Frequencies -- | 1351.4078 | 1364.8154 | 1367.4102 |
| Red. masses -- | 1.6154    | 1.2713    | 1.8665    |
| Frc consts --  | 1.7382    | 1.3953    | 2.0563    |
| IR Inten --    | 3.8793    | 6.4354    | 5.4518    |
| Raman Activ -- | 2.9367    | 2.7506    | 20.2257   |
| Depolar (P) -- | 0.6670    | 0.6226    | 0.1185    |
| Depolar (U) -- | 0.8002    | 0.7674    | 0.2119    |

|      |    |       |       |       |      |       |       |       |       |       |
|------|----|-------|-------|-------|------|-------|-------|-------|-------|-------|
| Atom | AN | X     | Y     | Z     | X    | Y     | Z     | X     | Y     | Z     |
| 1    | 6  | 0.01  | 0.00  | -0.01 | 0.00 | -0.01 | 0.00  | 0.00  | 0.00  | 0.00  |
| 2    | 6  | 0.00  | 0.00  | 0.00  | 0.00 | 0.00  | -0.01 | 0.00  | 0.00  | 0.00  |
| 3    | 6  | -0.03 | 0.00  | 0.01  | 0.00 | 0.01  | 0.00  | 0.00  | 0.00  | 0.00  |
| 4    | 6  | 0.02  | 0.00  | 0.00  | 0.00 | -0.01 | -0.01 | 0.01  | 0.00  | 0.00  |
| 5    | 6  | -0.02 | -0.01 | -0.03 | 0.00 | 0.00  | 0.00  | -0.01 | 0.01  | 0.02  |
| 6    | 6  | 0.07  | -0.01 | -0.01 | 0.00 | 0.00  | 0.00  | -0.03 | -0.01 | -0.03 |

|    |   |       |       |       |       |       |       |       |       |       |
|----|---|-------|-------|-------|-------|-------|-------|-------|-------|-------|
| 7  | 8 | 0.00  | 0.00  | 0.00  | 0.00  | 0.00  | 0.00  | 0.00  | 0.00  | 0.00  |
| 8  | 6 | 0.00  | 0.00  | 0.00  | 0.01  | -0.02 | -0.03 | 0.00  | 0.00  | 0.00  |
| 9  | 6 | 0.00  | 0.00  | 0.00  | -0.09 | 0.01  | 0.03  | 0.00  | 0.00  | 0.00  |
| 10 | 1 | 0.01  | -0.01 | 0.00  | 0.59  | 0.21  | -0.30 | 0.01  | -0.01 | 0.00  |
| 11 | 8 | 0.00  | 0.00  | 0.00  | -0.01 | -0.02 | 0.04  | 0.00  | 0.00  | 0.00  |
| 12 | 6 | -0.01 | 0.00  | 0.00  | 0.03  | -0.03 | -0.02 | 0.00  | 0.00  | 0.00  |
| 13 | 1 | 0.03  | 0.04  | -0.04 | -0.10 | 0.21  | -0.29 | 0.02  | 0.01  | -0.01 |
| 14 | 6 | -0.01 | 0.02  | 0.00  | 0.00  | 0.00  | 0.00  | -0.02 | 0.09  | -0.02 |
| 15 | 8 | 0.01  | -0.01 | 0.01  | 0.00  | 0.00  | 0.00  | 0.03  | -0.02 | 0.03  |
| 16 | 6 | 0.00  | 0.00  | 0.00  | -0.02 | 0.01  | 0.00  | 0.00  | 0.00  | 0.00  |
| 17 | 1 | 0.00  | 0.00  | 0.00  | 0.04  | -0.04 | 0.07  | 0.00  | 0.00  | 0.00  |
| 18 | 1 | 0.00  | 0.00  | 0.00  | 0.11  | -0.03 | 0.03  | 0.01  | 0.00  | 0.00  |
| 19 | 1 | 0.00  | 0.00  | 0.00  | 0.08  | 0.01  | 0.00  | 0.01  | 0.00  | 0.00  |
| 20 | 6 | 0.00  | 0.00  | 0.00  | 0.01  | 0.02  | 0.00  | 0.00  | 0.00  | 0.00  |
| 21 | 1 | 0.01  | -0.01 | -0.01 | 0.05  | -0.05 | -0.06 | 0.00  | -0.01 | 0.00  |
| 22 | 6 | 0.00  | 0.00  | 0.00  | 0.00  | 0.00  | 0.00  | 0.00  | 0.00  | 0.00  |
| 23 | 1 | 0.00  | 0.00  | 0.01  | 0.00  | -0.01 | 0.00  | 0.00  | 0.00  | 0.00  |
| 24 | 1 | 0.02  | -0.01 | 0.01  | -0.01 | -0.01 | 0.01  | 0.00  | 0.00  | 0.00  |
| 25 | 1 | 0.02  | -0.01 | 0.01  | -0.01 | 0.01  | 0.00  | 0.00  | 0.00  | 0.00  |
| 26 | 6 | -0.13 | 0.14  | 0.01  | 0.00  | 0.00  | 0.00  | 0.03  | -0.03 | 0.00  |
| 27 | 1 | 0.41  | -0.49 | 0.01  | 0.00  | 0.00  | 0.00  | -0.12 | 0.17  | -0.01 |
| 28 | 1 | 0.38  | -0.46 | 0.00  | 0.00  | 0.00  | 0.00  | -0.07 | 0.08  | 0.00  |
| 29 | 6 | 0.00  | 0.00  | 0.00  | 0.00  | 0.05  | 0.01  | 0.00  | 0.01  | 0.00  |
| 30 | 1 | -0.01 | 0.02  | 0.01  | 0.09  | -0.24 | -0.13 | 0.01  | -0.03 | -0.02 |
| 31 | 1 | -0.01 | 0.02  | 0.01  | 0.10  | -0.22 | -0.16 | 0.01  | -0.02 | -0.01 |
| 32 | 6 | 0.00  | 0.00  | 0.00  | 0.00  | -0.01 | -0.01 | 0.00  | 0.00  | 0.00  |
| 33 | 1 | 0.00  | 0.00  | 0.00  | 0.05  | 0.12  | 0.06  | 0.00  | 0.00  | 0.00  |
| 34 | 6 | 0.00  | 0.00  | 0.00  | -0.01 | 0.00  | 0.02  | 0.00  | 0.00  | 0.00  |
| 35 | 1 | 0.00  | 0.00  | 0.00  | 0.06  | 0.06  | -0.03 | 0.00  | 0.00  | 0.00  |
| 36 | 6 | 0.00  | 0.00  | 0.00  | 0.01  | 0.00  | 0.03  | 0.00  | 0.00  | 0.00  |
| 37 | 1 | 0.01  | 0.00  | 0.00  | -0.03 | 0.04  | -0.07 | 0.01  | 0.00  | 0.01  |
| 38 | 1 | 0.01  | 0.00  | 0.00  | -0.07 | -0.02 | -0.10 | 0.01  | 0.00  | 0.01  |
| 39 | 1 | 0.00  | 0.00  | -0.01 | 0.02  | 0.02  | -0.09 | 0.00  | 0.00  | 0.01  |
| 40 | 6 | 0.05  | -0.05 | 0.01  | 0.00  | 0.00  | 0.00  | -0.01 | 0.01  | 0.00  |
| 41 | 1 | 0.01  | 0.04  | -0.12 | -0.02 | 0.00  | -0.01 | 0.02  | 0.00  | 0.03  |
| 42 | 6 | -0.01 | 0.02  | -0.02 | 0.00  | 0.00  | 0.00  | 0.01  | 0.00  | 0.01  |
| 43 | 1 | -0.02 | -0.11 | 0.08  | 0.00  | 0.00  | 0.00  | -0.01 | 0.02  | 0.02  |
| 44 | 1 | 0.03  | 0.02  | 0.10  | 0.00  | 0.00  | 0.00  | -0.05 | 0.00  | -0.02 |
| 45 | 1 | 0.01  | -0.06 | 0.13  | 0.00  | 0.00  | 0.00  | 0.00  | -0.03 | -0.02 |
| 46 | 6 | -0.01 | 0.03  | 0.00  | 0.00  | 0.00  | 0.00  | 0.02  | 0.00  | 0.00  |
| 47 | 1 | 0.04  | -0.03 | 0.06  | 0.01  | -0.01 | 0.00  | 0.05  | -0.04 | 0.03  |
| 48 | 6 | -0.02 | -0.02 | -0.02 | 0.00  | 0.00  | 0.00  | -0.07 | -0.03 | -0.09 |
| 49 | 1 | 0.07  | 0.06  | 0.05  | 0.00  | 0.00  | 0.00  | 0.11  | 0.06  | 0.09  |
| 50 | 1 | 0.06  | 0.05  | 0.07  | 0.00  | -0.01 | 0.00  | 0.27  | 0.26  | 0.28  |
| 51 | 6 | 0.03  | -0.02 | 0.02  | 0.00  | 0.00  | 0.00  | 0.08  | 0.03  | 0.11  |
| 52 | 1 | -0.24 | 0.08  | -0.02 | 0.01  | 0.01  | 0.01  | -0.18 | -0.34 | -0.33 |
| 53 | 6 | -0.02 | -0.01 | -0.02 | 0.00  | 0.00  | 0.00  | -0.09 | -0.07 | -0.08 |
| 54 | 1 | 0.05  | 0.02  | 0.06  | 0.00  | 0.00  | 0.00  | 0.26  | 0.06  | 0.25  |
| 55 | 6 | 0.01  | 0.02  | 0.00  | 0.00  | 0.00  | 0.00  | 0.02  | 0.09  | 0.01  |
| 56 | 1 | 0.03  | -0.08 | 0.05  | 0.00  | 0.01  | 0.00  | 0.14  | -0.35 | 0.20  |
| 57 | 6 | -0.01 | -0.01 | 0.00  | 0.00  | 0.00  | 0.00  | -0.03 | -0.05 | -0.02 |
| 58 | 1 | 0.02  | -0.02 | 0.02  | 0.00  | 0.00  | 0.00  | 0.10  | -0.09 | 0.11  |

|    |   |       |       |       |       |       |       |      |       |      |
|----|---|-------|-------|-------|-------|-------|-------|------|-------|------|
| 59 | 8 | 0.00  | 0.01  | -0.01 | 0.00  | 0.00  | 0.00  | 0.00 | 0.00  | 0.00 |
| 60 | 8 | 0.00  | 0.00  | 0.00  | 0.00  | 0.01  | 0.02  | 0.00 | 0.00  | 0.00 |
| 61 | 8 | 0.00  | -0.01 | 0.01  | 0.00  | 0.00  | 0.00  | 0.00 | 0.00  | 0.00 |
| 62 | 6 | 0.00  | 0.00  | 0.00  | -0.01 | 0.00  | 0.00  | 0.00 | 0.00  | 0.00 |
| 63 | 6 | 0.00  | 0.00  | 0.00  | 0.03  | 0.00  | -0.03 | 0.00 | 0.00  | 0.00 |
| 64 | 6 | 0.00  | 0.00  | 0.00  | 0.00  | 0.01  | 0.01  | 0.00 | 0.00  | 0.00 |
| 65 | 8 | 0.00  | 0.00  | 0.00  | 0.00  | 0.00  | 0.00  | 0.00 | 0.00  | 0.00 |
| 66 | 1 | 0.00  | -0.01 | 0.00  | -0.12 | -0.22 | -0.01 | 0.00 | -0.01 | 0.00 |
| 67 | 6 | 0.00  | 0.00  | 0.00  | -0.01 | 0.01  | 0.01  | 0.00 | 0.00  | 0.00 |
| 68 | 1 | 0.00  | 0.00  | 0.00  | -0.02 | -0.01 | 0.00  | 0.00 | 0.00  | 0.00 |
| 69 | 1 | 0.00  | 0.00  | 0.00  | 0.01  | -0.05 | -0.04 | 0.00 | 0.00  | 0.00 |
| 70 | 1 | 0.00  | 0.00  | 0.00  | 0.00  | -0.04 | -0.04 | 0.00 | 0.00  | 0.00 |
| 71 | 6 | 0.00  | 0.00  | 0.00  | 0.00  | 0.00  | 0.00  | 0.00 | 0.00  | 0.00 |
| 72 | 1 | 0.00  | 0.00  | 0.01  | -0.03 | 0.03  | 0.05  | 0.00 | 0.00  | 0.01 |
| 73 | 1 | -0.01 | 0.00  | 0.00  | -0.05 | 0.03  | 0.03  | 0.00 | 0.00  | 0.00 |
| 74 | 1 | 0.00  | 0.00  | 0.01  | -0.05 | -0.02 | 0.07  | 0.01 | 0.00  | 0.00 |

|    |   |       |       |       |       |       |       |       |       |       |
|----|---|-------|-------|-------|-------|-------|-------|-------|-------|-------|
| 27 | 1 | 0.01  | -0.01 | 0.00  | -0.01 | 0.01  | 0.00  | 0.01  | -0.01 | 0.00  |
| 28 | 1 | 0.00  | -0.01 | 0.00  | -0.01 | 0.01  | 0.00  | 0.00  | 0.00  | 0.00  |
| 29 | 6 | 0.00  | 0.02  | 0.00  | 0.03  | -0.10 | -0.03 | 0.00  | -0.03 | -0.01 |
| 30 | 1 | 0.04  | -0.11 | -0.06 | -0.16 | 0.45  | 0.24  | -0.02 | 0.09  | 0.04  |
| 31 | 1 | 0.05  | -0.10 | -0.07 | -0.17 | 0.38  | 0.19  | -0.04 | 0.08  | 0.04  |
| 32 | 6 | 0.00  | -0.01 | 0.00  | 0.01  | 0.00  | -0.01 | 0.00  | -0.05 | -0.05 |
| 33 | 1 | 0.03  | 0.06  | 0.03  | -0.03 | -0.09 | -0.05 | 0.15  | 0.29  | 0.12  |
| 34 | 6 | -0.01 | 0.00  | 0.01  | 0.01  | 0.01  | -0.01 | -0.05 | -0.02 | 0.06  |
| 35 | 1 | 0.03  | 0.03  | -0.02 | -0.03 | -0.02 | 0.01  | 0.20  | 0.18  | -0.12 |
| 36 | 6 | 0.00  | 0.00  | 0.01  | 0.00  | 0.00  | 0.01  | 0.00  | 0.00  | -0.02 |
| 37 | 1 | -0.01 | 0.01  | -0.02 | -0.02 | 0.01  | -0.02 | 0.02  | -0.05 | 0.08  |
| 38 | 1 | -0.02 | -0.01 | -0.03 | -0.06 | 0.01  | -0.04 | 0.02  | 0.05  | 0.09  |
| 39 | 1 | 0.01  | 0.01  | -0.03 | 0.01  | 0.03  | -0.05 | -0.01 | 0.00  | 0.07  |
| 40 | 6 | 0.00  | 0.00  | 0.00  | 0.00  | 0.00  | 0.00  | 0.00  | 0.00  | 0.00  |
| 41 | 1 | -0.01 | 0.00  | 0.00  | 0.03  | 0.01  | 0.01  | 0.01  | 0.00  | 0.01  |
| 42 | 6 | 0.00  | 0.00  | 0.00  | 0.00  | 0.00  | 0.00  | 0.00  | 0.00  | 0.00  |
| 43 | 1 | 0.00  | 0.00  | 0.00  | 0.00  | 0.00  | 0.00  | 0.00  | 0.00  | 0.00  |
| 44 | 1 | 0.00  | 0.00  | 0.00  | 0.00  | 0.00  | 0.00  | -0.01 | 0.00  | 0.01  |
| 45 | 1 | 0.00  | 0.00  | 0.00  | 0.00  | 0.00  | 0.00  | 0.00  | -0.01 | 0.01  |
| 46 | 6 | 0.00  | 0.00  | 0.00  | 0.00  | 0.00  | 0.00  | 0.00  | 0.00  | 0.00  |
| 47 | 1 | 0.01  | -0.01 | 0.00  | 0.01  | -0.01 | 0.00  | 0.00  | 0.00  | 0.00  |
| 48 | 6 | 0.00  | 0.00  | 0.00  | 0.00  | 0.00  | 0.00  | 0.00  | 0.00  | 0.00  |
| 49 | 1 | 0.00  | 0.00  | 0.00  | 0.01  | 0.01  | 0.01  | 0.00  | 0.00  | 0.00  |
| 50 | 1 | 0.00  | 0.00  | 0.00  | 0.01  | 0.01  | 0.01  | 0.00  | 0.00  | 0.00  |
| 51 | 6 | 0.00  | 0.00  | 0.00  | 0.00  | 0.00  | 0.00  | 0.00  | 0.00  | 0.00  |
| 52 | 1 | 0.00  | 0.00  | 0.00  | 0.00  | -0.01 | -0.01 | 0.00  | 0.00  | 0.00  |
| 53 | 6 | 0.00  | 0.00  | 0.00  | 0.00  | 0.00  | 0.00  | 0.00  | 0.00  | 0.00  |
| 54 | 1 | 0.00  | 0.00  | 0.00  | 0.01  | 0.00  | 0.01  | 0.00  | 0.00  | 0.00  |
| 55 | 6 | 0.00  | 0.00  | 0.00  | 0.00  | 0.00  | 0.00  | 0.00  | 0.00  | 0.00  |
| 56 | 1 | 0.00  | 0.00  | 0.00  | 0.00  | -0.01 | 0.01  | 0.00  | 0.00  | 0.00  |
| 57 | 6 | 0.00  | 0.00  | 0.00  | 0.00  | 0.00  | 0.00  | 0.00  | 0.00  | 0.00  |
| 58 | 1 | 0.00  | 0.00  | 0.00  | 0.00  | 0.00  | 0.00  | 0.00  | 0.00  | 0.00  |
| 59 | 8 | 0.00  | 0.00  | 0.00  | 0.00  | 0.00  | 0.00  | 0.00  | 0.00  | 0.00  |
| 60 | 8 | 0.00  | 0.01  | 0.00  | 0.00  | 0.00  | 0.01  | 0.00  | -0.01 | -0.02 |
| 61 | 8 | 0.00  | 0.00  | 0.00  | 0.00  | 0.00  | 0.00  | 0.00  | 0.00  | 0.00  |
| 62 | 6 | 0.01  | -0.02 | 0.00  | 0.00  | 0.00  | 0.00  | 0.00  | -0.01 | 0.00  |
| 63 | 6 | -0.09 | 0.01  | 0.11  | -0.01 | 0.00  | 0.01  | 0.01  | 0.00  | -0.01 |
| 64 | 6 | 0.00  | -0.05 | -0.03 | 0.00  | -0.01 | 0.00  | 0.00  | 0.01  | 0.00  |
| 65 | 8 | 0.00  | 0.00  | -0.01 | 0.00  | 0.00  | 0.00  | 0.00  | 0.00  | 0.00  |
| 66 | 1 | 0.38  | 0.70  | 0.02  | 0.03  | 0.06  | 0.00  | -0.03 | -0.06 | 0.00  |
| 67 | 6 | 0.01  | -0.03 | -0.04 | 0.00  | 0.00  | 0.00  | 0.00  | 0.00  | 0.01  |
| 68 | 1 | 0.08  | 0.07  | 0.00  | 0.01  | 0.01  | 0.00  | -0.01 | -0.02 | 0.00  |
| 69 | 1 | -0.04 | 0.18  | 0.12  | 0.00  | 0.02  | 0.01  | 0.01  | -0.03 | -0.02 |
| 70 | 1 | 0.02  | 0.14  | 0.14  | 0.00  | 0.02  | 0.02  | -0.01 | -0.03 | -0.03 |
| 71 | 6 | 0.00  | -0.01 | -0.01 | 0.00  | 0.00  | 0.00  | 0.00  | 0.00  | 0.01  |
| 72 | 1 | 0.08  | -0.09 | -0.16 | 0.00  | 0.00  | -0.02 | 0.00  | 0.00  | 0.01  |
| 73 | 1 | 0.15  | -0.03 | -0.09 | 0.02  | 0.01  | -0.01 | 0.00  | -0.03 | -0.01 |
| 74 | 1 | 0.15  | 0.04  | -0.15 | 0.00  | 0.00  | 0.00  | 0.00  | 0.00  | -0.04 |

148

149

150

A

A

A

Frequencies -- 1399.3170

1402.0625

1405.5801

Red. masses -- 1.1990

1.4004

1.3084

|                |    |       |        |       |       |         |       |       |         |       |  |
|----------------|----|-------|--------|-------|-------|---------|-------|-------|---------|-------|--|
| Frc consts --  |    |       | 1.3833 |       |       | 1.6220  |       |       | 1.5230  |       |  |
| IR Inten --    |    |       | 5.4113 |       |       | 12.7684 |       |       | 6.3221  |       |  |
| Raman Activ -- |    |       | 6.6084 |       |       | 4.8755  |       |       | 38.7377 |       |  |
| Depolar (P) -- |    |       | 0.5293 |       |       | 0.7456  |       |       | 0.5239  |       |  |
| Depolar (U) -- |    |       | 0.6922 |       |       | 0.8542  |       |       | 0.6876  |       |  |
| Atom           | AN | X     | Y      | Z     | X     | Y       | Z     | X     | Y       | Z     |  |
| 1              | 6  | 0.00  | 0.01   | -0.01 | 0.00  | 0.01    | 0.00  | 0.00  | 0.00    | 0.00  |  |
| 2              | 6  | -0.01 | 0.00   | 0.01  | 0.00  | -0.01   | -0.01 | 0.00  | 0.00    | 0.00  |  |
| 3              | 6  | 0.00  | -0.01  | -0.01 | 0.00  | 0.00    | 0.00  | 0.00  | 0.00    | 0.00  |  |
| 4              | 6  | 0.01  | 0.01   | 0.02  | 0.00  | 0.00    | -0.01 | 0.00  | 0.00    | 0.00  |  |
| 5              | 6  | 0.00  | 0.00   | -0.01 | 0.00  | 0.00    | 0.00  | 0.00  | 0.00    | 0.00  |  |
| 6              | 6  | 0.00  | 0.01   | 0.00  | 0.00  | 0.00    | 0.00  | 0.00  | 0.00    | 0.00  |  |
| 7              | 8  | 0.00  | 0.00   | 0.00  | 0.01  | 0.02    | 0.00  | 0.00  | 0.00    | 0.00  |  |
| 8              | 6  | 0.00  | -0.01  | -0.01 | 0.02  | 0.05    | 0.04  | 0.00  | 0.00    | 0.00  |  |
| 9              | 6  | -0.02 | 0.00   | 0.04  | 0.03  | -0.01   | -0.03 | 0.00  | 0.00    | 0.00  |  |
| 10             | 1  | 0.29  | 0.09   | -0.12 | -0.20 | 0.03    | 0.10  | -0.01 | -0.01   | 0.00  |  |
| 11             | 8  | 0.00  | -0.01  | 0.01  | 0.00  | 0.00    | -0.01 | 0.00  | 0.00    | 0.00  |  |
| 12             | 6  | -0.02 | 0.04   | -0.05 | 0.00  | -0.01   | 0.02  | 0.00  | 0.00    | 0.00  |  |
| 13             | 1  | 0.24  | -0.41  | 0.46  | -0.12 | 0.16    | -0.17 | -0.02 | 0.02    | -0.03 |  |
| 14             | 6  | 0.00  | 0.00   | 0.00  | 0.00  | 0.00    | 0.00  | 0.00  | 0.00    | 0.00  |  |
| 15             | 8  | 0.00  | 0.00   | 0.00  | 0.00  | 0.00    | 0.00  | 0.00  | 0.00    | 0.00  |  |
| 16             | 6  | 0.03  | -0.01  | 0.02  | 0.00  | -0.02   | -0.01 | 0.00  | 0.00    | 0.00  |  |
| 17             | 1  | -0.09 | 0.06   | -0.12 | -0.02 | 0.10    | 0.00  | 0.00  | 0.00    | 0.00  |  |
| 18             | 1  | -0.12 | 0.07   | -0.04 | -0.01 | 0.02    | -0.03 | 0.00  | 0.00    | 0.00  |  |
| 19             | 1  | -0.14 | -0.04  | -0.07 | -0.05 | 0.01    | 0.05  | 0.00  | 0.00    | 0.00  |  |
| 20             | 6  | 0.00  | 0.02   | 0.00  | -0.01 | -0.01   | -0.01 | 0.00  | 0.00    | 0.00  |  |
| 21             | 1  | -0.02 | -0.18  | -0.04 | -0.07 | 0.03    | 0.06  | -0.01 | 0.01    | 0.01  |  |
| 22             | 6  | -0.03 | 0.03   | -0.05 | -0.04 | 0.04    | -0.06 | 0.00  | 0.00    | 0.00  |  |
| 23             | 1  | 0.02  | -0.14  | 0.25  | 0.03  | -0.16   | 0.31  | 0.00  | 0.00    | 0.00  |  |
| 24             | 1  | 0.08  | -0.22  | 0.16  | 0.09  | -0.27   | 0.19  | 0.00  | 0.00    | 0.00  |  |
| 25             | 1  | 0.26  | -0.06  | 0.21  | 0.31  | -0.06   | 0.27  | 0.00  | 0.00    | 0.00  |  |
| 26             | 6  | 0.00  | 0.00   | 0.00  | 0.00  | -0.01   | 0.00  | 0.00  | 0.00    | 0.00  |  |
| 27             | 1  | -0.01 | 0.00   | 0.00  | -0.02 | 0.02    | 0.00  | 0.00  | 0.00    | 0.00  |  |
| 28             | 1  | 0.00  | 0.00   | 0.00  | -0.01 | 0.01    | 0.00  | 0.00  | 0.00    | 0.00  |  |
| 29             | 6  | 0.00  | 0.01   | 0.00  | 0.00  | -0.01   | 0.00  | 0.00  | 0.00    | 0.00  |  |
| 30             | 1  | 0.02  | -0.03  | -0.02 | -0.02 | 0.06    | 0.02  | 0.00  | 0.00    | 0.00  |  |
| 31             | 1  | 0.01  | -0.02  | -0.04 | -0.01 | 0.00    | 0.03  | 0.00  | 0.00    | 0.00  |  |
| 32             | 6  | 0.00  | 0.01   | 0.01  | 0.00  | -0.06   | -0.08 | 0.00  | 0.00    | 0.00  |  |
| 33             | 1  | -0.03 | -0.06  | -0.03 | 0.19  | 0.37    | 0.14  | 0.00  | 0.00    | 0.00  |  |
| 34             | 6  | 0.01  | 0.00   | -0.01 | -0.07 | -0.03   | 0.07  | 0.00  | 0.00    | 0.00  |  |
| 35             | 1  | -0.04 | -0.04  | 0.02  | 0.28  | 0.25    | -0.19 | 0.00  | 0.00    | 0.00  |  |
| 36             | 6  | 0.00  | 0.00   | 0.00  | 0.00  | 0.00    | 0.02  | 0.00  | 0.00    | 0.00  |  |
| 37             | 1  | -0.04 | -0.02  | 0.01  | -0.03 | 0.04    | -0.07 | 0.00  | 0.01    | -0.01 |  |
| 38             | 1  | -0.04 | 0.04   | 0.03  | -0.01 | -0.03   | -0.07 | 0.00  | -0.01   | -0.01 |  |
| 39             | 1  | 0.    |        |       |       |         |       |       |         |       |  |

|    |   |       |       |       |       |       |      |       |       |       |
|----|---|-------|-------|-------|-------|-------|------|-------|-------|-------|
| 47 | 1 | 0.01  | -0.01 | 0.01  | 0.01  | -0.01 | 0.00 | 0.00  | 0.00  | 0.00  |
| 48 | 6 | 0.00  | 0.00  | 0.00  | 0.00  | 0.00  | 0.00 | 0.00  | 0.00  | 0.00  |
| 49 | 1 | 0.01  | 0.00  | 0.00  | 0.00  | 0.00  | 0.00 | 0.00  | 0.00  | 0.00  |
| 50 | 1 | 0.00  | 0.00  | 0.00  | 0.00  | 0.00  | 0.00 | 0.00  | 0.00  | 0.00  |
| 51 | 6 | 0.00  | 0.00  | 0.00  | 0.00  | 0.00  | 0.00 | 0.00  | 0.00  | 0.00  |
| 52 | 1 | -0.01 | 0.01  | 0.00  | 0.00  | 0.01  | 0.01 | 0.00  | 0.00  | 0.00  |
| 53 | 6 | 0.00  | 0.00  | 0.00  | 0.00  | 0.00  | 0.00 | 0.00  | 0.00  | 0.00  |
| 54 | 1 | 0.00  | 0.00  | 0.00  | 0.00  | 0.00  | 0.00 | 0.00  | 0.00  | 0.00  |
| 55 | 6 | 0.00  | 0.00  | 0.00  | 0.00  | 0.00  | 0.00 | 0.00  | 0.00  | 0.00  |
| 56 | 1 | 0.00  | 0.00  | 0.00  | 0.00  | 0.00  | 0.00 | 0.00  | 0.00  | 0.00  |
| 57 | 6 | 0.00  | 0.00  | 0.00  | 0.00  | 0.00  | 0.00 | 0.00  | 0.00  | 0.00  |
| 58 | 1 | 0.00  | 0.00  | 0.00  | 0.00  | 0.00  | 0.00 | 0.00  | 0.00  | 0.00  |
| 59 | 8 | 0.00  | 0.00  | 0.00  | 0.00  | 0.00  | 0.00 | 0.00  | 0.00  | 0.00  |
| 60 | 8 | 0.00  | 0.00  | -0.03 | 0.00  | 0.00  | 0.01 | 0.00  | 0.00  | 0.00  |
| 61 | 8 | 0.00  | 0.00  | 0.00  | 0.00  | 0.00  | 0.00 | 0.00  | 0.00  | 0.00  |
| 62 | 6 | -0.01 | -0.03 | -0.01 | 0.00  | 0.01  | 0.00 | 0.00  | -0.01 | 0.00  |
| 63 | 6 | 0.00  | 0.01  | 0.00  | 0.00  | 0.00  | 0.00 | -0.04 | 0.01  | 0.05  |
| 64 | 6 | 0.01  | 0.01  | 0.00  | 0.00  | 0.00  | 0.00 | 0.01  | -0.03 | -0.03 |
| 65 | 8 | 0.00  | 0.00  | 0.01  | 0.00  | 0.00  | 0.00 | 0.00  | 0.00  | -0.01 |
| 66 | 1 | -0.03 | -0.06 | -0.01 | 0.01  | 0.02  | 0.00 | 0.14  | 0.22  | -0.02 |
| 67 | 6 | 0.00  | 0.01  | 0.01  | 0.00  | 0.00  | 0.00 | 0.04  | 0.12  | 0.04  |
| 68 | 1 | -0.02 | -0.03 | 0.00  | 0.01  | 0.01  | 0.00 | -0.22 | -0.35 | -0.04 |
| 69 | 1 | 0.01  | -0.05 | -0.02 | 0.00  | 0.02  | 0.01 | 0.07  | -0.60 | 0.00  |
| 70 | 1 | -0.01 | -0.04 | -0.04 | 0.00  | 0.01  | 0.01 | -0.34 | -0.32 | -0.36 |
| 71 | 6 | 0.00  | 0.00  | 0.01  | 0.00  | 0.00  | 0.00 | 0.02  | -0.01 | -0.03 |
| 72 | 1 | 0.00  | 0.00  | 0.00  | 0.00  | 0.00  | 0.00 | -0.04 | 0.05  | 0.06  |
| 73 | 1 | 0.02  | -0.05 | -0.02 | -0.01 | 0.02  | 0.01 | -0.04 | 0.04  | 0.01  |
| 74 | 1 | 0.00  | 0.01  | -0.07 | 0.00  | 0.00  | 0.03 | -0.03 | -0.03 | 0.06  |

151

152

153

A

A

A

|                |           |           |           |
|----------------|-----------|-----------|-----------|
| Frequencies -- | 1413.9695 | 1414.8341 | 1416.3711 |
| Red. masses -- | 1.3251    | 1.7452    | 1.4309    |
| Frc consts --  | 1.5609    | 2.0583    | 1.6913    |
| IR Inten --    | 11.5954   | 5.2808    | 0.6332    |
| Raman Activ -- | 25.6085   | 12.6492   | 11.5796   |
| Depolar (P) -- | 0.3239    | 0.7191    | 0.7353    |
| Depolar (U) -- | 0.4894    | 0.8366    | 0.8475    |

| Atom | AN | X     | Y     | Z     | X     | Y     | Z     | X     | Y     | Z     |
|------|----|-------|-------|-------|-------|-------|-------|-------|-------|-------|
| 1    | 6  | 0.00  | 0.00  | 0.00  | 0.00  | 0.00  | 0.00  | 0.00  | 0.00  | 0.00  |
| 2    | 6  | 0.00  | 0.00  | 0.00  | 0.00  | 0.00  | 0.00  | 0.00  | 0.00  | 0.00  |
| 3    | 6  | 0.00  | 0.00  | 0.00  | -0.01 | -0.01 | 0.00  | 0.02  | 0.00  | 0.00  |
| 4    | 6  | 0.00  | 0.00  | 0.00  | 0.00  | 0.01  | 0.00  | -0.01 | 0.00  | 0.01  |
| 5    | 6  | 0.00  | -0.01 | -0.01 | 0.00  | -0.01 | -0.01 | 0.02  | 0.00  | 0.00  |
| 6    | 6  | 0.01  | 0.00  | 0.01  | 0.01  | 0.01  | 0.02  | -0.01 | -0.01 | 0.03  |
| 7    | 8  | 0.00  | 0.00  | 0.00  | 0.00  | 0.00  | 0.00  | 0.00  | 0.00  | 0.00  |
| 8    | 6  | 0.00  | 0.00  | 0.00  | 0.00  | 0.00  | 0.00  | 0.00  | 0.00  | 0.00  |
| 9    | 6  | 0.00  | 0.00  | 0.00  | 0.00  | 0.00  | 0.00  | 0.01  | 0.00  | 0.00  |
| 10   | 1  | -0.03 | -0.02 | 0.01  | 0.00  | 0.00  | 0.00  | -0.05 | -0.02 | 0.03  |
| 11   | 8  | 0.00  | 0.00  | 0.00  | 0.00  | 0.00  | 0.00  | 0.00  | 0.00  | 0.00  |
| 12   | 6  | 0.00  | 0.00  | 0.01  | 0.00  | 0.00  | 0.00  | 0.00  | 0.01  | -0.01 |
| 13   | 1  | -0.03 | 0.05  | -0.05 | 0.00  | -0.03 | 0.03  | 0.00  | -0.07 | 0.08  |
| 14   | 6  | 0.02  | 0.05  | 0.01  | 0.06  | 0.14  | 0.02  | 0.04  | 0.08  | 0.01  |

|    |   |       |       |       |       |       |       |       |       |       |      |
|----|---|-------|-------|-------|-------|-------|-------|-------|-------|-------|------|
| 15 | 8 | 0.00  | 0.00  | 0.00  | 0.00  | -0.01 | 0.00  | 0.00  | 0.00  | 0.00  | 0.00 |
| 16 | 6 | -0.01 | 0.00  | -0.01 | -0.01 | 0.00  | -0.01 | -0.01 | 0.00  | -0.01 |      |
| 17 | 1 | 0.02  | -0.01 | 0.03  | 0.03  | -0.01 | 0.04  | 0.03  | -0.02 | 0.04  |      |
| 18 | 1 | 0.03  | -0.02 | 0.01  | 0.05  | -0.03 | 0.02  | 0.05  | -0.02 | 0.01  |      |
| 19 | 1 | 0.03  | 0.01  | 0.02  | 0.05  | 0.01  | 0.03  | 0.05  | 0.01  | 0.02  |      |
| 20 | 6 | 0.00  | 0.00  | 0.00  | 0.00  | 0.00  | 0.00  | 0.00  | 0.00  | 0.00  |      |
| 21 | 1 | -0.02 | 0.03  | 0.03  | -0.01 | -0.01 | 0.01  | 0.02  | 0.02  | -0.01 |      |
| 22 | 6 | 0.00  | 0.00  | 0.00  | 0.00  | 0.00  | 0.00  | 0.00  | 0.00  | -0.01 |      |
| 23 | 1 | 0.00  | 0.01  | -0.01 | 0.00  | 0.00  | 0.00  | 0.01  | 0.01  | 0.03  |      |
| 24 | 1 | 0.00  | 0.01  | -0.01 | 0.00  | 0.00  | 0.00  | 0.02  | -0.03 | 0.02  |      |
| 25 | 1 | -0.02 | 0.01  | -0.01 | 0.00  | 0.00  | 0.00  | 0.01  | 0.01  | 0.03  |      |
| 26 | 6 | -0.01 | 0.01  | 0.00  | -0.02 | 0.01  | 0.00  | 0.02  | 0.00  | 0.00  |      |
| 27 | 1 | 0.03  | -0.02 | -0.01 | 0.05  | -0.05 | -0.01 | -0.04 | -0.02 | 0.04  |      |
| 28 | 1 | 0.02  | -0.01 | 0.01  | 0.04  | -0.01 | 0.02  | -0.09 | 0.04  | -0.03 |      |
| 29 | 6 | 0.00  | 0.00  | 0.00  | 0.00  | 0.00  | 0.00  | 0.00  | 0.00  | 0.00  |      |
| 30 | 1 | -0.01 | 0.00  | 0.01  | -0.01 | 0.01  | 0.01  | 0.00  | 0.00  | 0.00  |      |
| 31 | 1 | 0.00  | 0.00  | 0.01  | 0.00  | 0.01  | 0.01  | 0.00  | 0.01  | 0.01  |      |
| 32 | 6 | 0.00  | 0.00  | 0.00  | 0.00  | 0.00  | 0.00  | 0.00  | 0.00  | 0.01  |      |
| 33 | 1 | -0.01 | -0.01 | -0.01 | -0.01 | -0.02 | -0.01 | -0.01 | -0.03 | -0.01 |      |
| 34 | 6 | 0.00  | 0.00  | 0.00  | 0.00  | 0.00  | 0.00  | 0.01  | 0.00  | -0.01 |      |
| 35 | 1 | -0.01 | -0.01 | 0.01  | -0.02 | -0.02 | 0.01  | -0.02 | -0.02 | 0.01  |      |
| 36 | 6 | 0.00  | 0.00  | 0.02  | 0.00  | 0.00  | -0.01 | 0.01  | -0.01 | 0.05  |      |
| 37 | 1 | -0.02 | 0.05  | -0.08 | 0.00  | -0.01 | 0.02  | -0.06 | 0.10  | -0.19 |      |
| 38 | 1 | -0.04 | -0.03 | -0.08 | 0.00  | 0.01  | 0.02  | -0.10 | -0.06 | -0.20 |      |
| 39 | 1 | 0.01  | 0.01  | -0.08 | 0.00  | 0.00  | 0.02  | 0.03  | 0.04  | -0.20 |      |
| 40 | 6 | 0.00  | 0.00  | 0.00  | 0.02  | 0.00  | 0.01  | -0.03 | 0.00  | -0.01 |      |
| 41 | 1 | 0.01  | 0.00  | 0.00  | -0.06 | 0.00  | -0.03 | 0.12  | 0.00  | 0.05  |      |
| 42 | 6 | -0.01 | -0.01 | 0.03  | -0.03 | -0.03 | 0.07  | 0.02  | 0.04  | -0.10 |      |
| 43 | 1 | 0.08  | 0.09  | -0.12 | 0.17  | 0.16  | -0.24 | -0.23 | -0.25 | 0.32  |      |
| 44 | 1 | 0.06  | -0.02 | -0.16 | 0.14  | -0.03 | -0.30 | -0.11 | 0.05  | 0.43  |      |
| 45 | 1 | -0.03 | 0.09  | -0.14 | -0.05 | 0.19  | -0.27 | 0.08  | -0.20 | 0.38  |      |
| 46 | 6 | 0.00  | 0.00  | 0.00  | 0.00  | 0.00  | 0.01  | -0.01 | 0.01  | 0.00  |      |
| 47 | 1 | 0.01  | -0.01 | 0.01  | -0.04 | 0.05  | -0.02 | 0.03  | -0.02 | 0.00  |      |
| 48 | 6 | 0.00  | 0.00  | 0.01  | 0.01  | 0.01  | 0.03  | 0.01  | 0.00  | 0.02  |      |
| 49 | 1 | 0.00  | 0.01  | 0.00  | -0.01 | 0.02  | 0.00  | -0.01 | 0.05  | -0.03 |      |
| 50 | 1 | -0.03 | -0.03 | -0.03 | -0.07 | -0.07 | -0.08 | -0.08 | -0.02 | -0.02 |      |
| 51 | 6 | -0.02 | -0.02 | -0.03 | -0.06 | -0.05 | -0.07 | -0.05 | -0.02 | -0.05 |      |
| 52 | 1 | 0.11  | 0.08  | 0.12  | 0.28  | 0.21  | 0.32  | 0.28  | 0.06  | 0.18  |      |
| 53 | 6 | -0.03 | -0.02 | -0.02 | -0.07 | -0.06 | -0.06 | -0.04 | -0.04 | -0.03 |      |
| 54 | 1 | 0.05  | 0.00  | 0.05  | 0.13  | 0.01  | 0.13  | 0.07  | 0.00  | 0.07  |      |
| 55 | 6 | 0.01  | 0.02  | 0.01  | 0.02  | 0.04  | 0.02  | 0.01  | 0.02  | 0.01  |      |
| 56 | 1 | 0.02  | -0.03 | 0.03  | 0.06  | -0.09 | 0.07  | 0.03  | -0.05 | 0.04  |      |
| 57 | 6 | 0.00  | -0.03 | 0.00  | 0.00  | -0.07 | 0.01  | 0.00  | -0.04 | 0.01  |      |
| 58 | 1 | 0.01  | -0.03 | 0.02  | 0.03  | -0.09 | 0.05  | 0.02  | -0.05 | 0.02  |      |
| 59 | 8 | 0.00  | 0.00  | 0.00  | 0.00  | 0.00  | 0.00  | 0.00  | 0.00  | 0.00  |      |
| 60 | 8 | 0.00  | 0.00  | 0.00  | 0.00  | 0.00  | 0.00  | 0.00  | 0.00  | 0.00  |      |
| 61 | 8 | 0.00  | 0.00  | 0.00  | 0.00  | 0.00  | 0.00  | 0.00  | 0.00  | 0.00  |      |
| 62 | 6 | -0.01 | -0.01 | 0.00  | 0.00  | 0.01  | 0.00  | 0.00  | 0.00  | 0.00  |      |
| 63 | 6 | 0.03  | 0.00  | -0.03 | -0.01 | 0.00  | 0.02  | 0.00  | 0.00  | 0.00  |      |
| 64 | 6 | 0.00  | 0.01  | 0.01  | 0.00  | -0.01 | 0.00  | 0.00  | 0.00  | 0.00  |      |
| 65 | 8 | 0.00  | 0.00  | 0.00  | 0.00  | 0.00  | 0.00  | 0.00  | 0.00  | 0.00  |      |
| 66 | 1 | -0.08 | -0.15 | 0.00  | 0.04  | 0.08  | 0.00  | 0.00  | 0.00  | 0.00  |      |

|    |   |       |       |       |       |       |       |       |      |      |
|----|---|-------|-------|-------|-------|-------|-------|-------|------|------|
| 67 | 6 | 0.00  | 0.02  | 0.01  | 0.00  | -0.01 | 0.00  | 0.00  | 0.00 | 0.00 |
| 68 | 1 | -0.02 | -0.05 | 0.00  | 0.01  | 0.03  | 0.00  | 0.00  | 0.00 | 0.00 |
| 69 | 1 | 0.00  | -0.14 | 0.02  | 0.00  | 0.08  | -0.01 | 0.00  | 0.01 | 0.00 |
| 70 | 1 | -0.09 | -0.09 | -0.08 | 0.05  | 0.05  | 0.05  | 0.01  | 0.00 | 0.00 |
| 71 | 6 | -0.07 | 0.02  | 0.10  | 0.04  | -0.01 | -0.06 | 0.00  | 0.00 | 0.00 |
| 72 | 1 | 0.12  | -0.15 | -0.42 | -0.07 | 0.09  | 0.24  | -0.01 | 0.01 | 0.01 |
| 73 | 1 | 0.44  | -0.17 | -0.21 | -0.25 | 0.10  | 0.12  | 0.00  | 0.00 | 0.00 |
| 74 | 1 | 0.20  | 0.11  | -0.43 | -0.12 | -0.06 | 0.25  | -0.01 | 0.00 | 0.00 |

154

155

156

A

A

A

|                |           |           |           |
|----------------|-----------|-----------|-----------|
| Frequencies -- | 1417.3472 | 1420.5762 | 1430.8730 |
| Red. masses -- | 1.2798    | 1.2435    | 3.1249    |
| Frc consts --  | 1.5148    | 1.4785    | 3.7696    |
| IR Inten --    | 1.5081    | 63.3216   | 5.2082    |
| Raman Activ -- | 2.4117    | 10.8875   | 17.6337   |
| Depolar (P) -- | 0.5610    | 0.3972    | 0.3196    |
| Depolar (U) -- | 0.7188    | 0.5686    | 0.4844    |

| Atom | AN | X     | Y     | Z     | X     | Y     | Z     | X     | Y     | Z     |
|------|----|-------|-------|-------|-------|-------|-------|-------|-------|-------|
| 1    | 6  | 0.00  | 0.01  | 0.00  | 0.01  | 0.00  | -0.01 | 0.02  | 0.00  | 0.00  |
| 2    | 6  | -0.01 | 0.00  | 0.01  | -0.01 | 0.00  | 0.01  | 0.00  | 0.00  | 0.00  |
| 3    | 6  | 0.00  | -0.01 | 0.00  | -0.02 | 0.00  | 0.00  | -0.04 | -0.01 | 0.00  |
| 4    | 6  | 0.00  | 0.00  | 0.01  | 0.01  | 0.00  | -0.01 | -0.03 | 0.02  | 0.01  |
| 5    | 6  | 0.00  | -0.01 | -0.01 | -0.01 | 0.01  | 0.01  | 0.17  | -0.15 | -0.14 |
| 6    | 6  | 0.00  | 0.00  | -0.01 | 0.00  | 0.00  | 0.00  | -0.03 | 0.04  | 0.02  |
| 7    | 8  | 0.00  | -0.01 | 0.00  | 0.00  | 0.00  | 0.00  | 0.00  | 0.00  | 0.00  |
| 8    | 6  | -0.01 | -0.01 | -0.01 | -0.01 | -0.01 | -0.01 | -0.01 | 0.00  | -0.03 |
| 9    | 6  | 0.00  | 0.00  | 0.00  | -0.01 | -0.01 | -0.01 | 0.02  | -0.02 | -0.01 |
| 10   | 1  | -0.08 | -0.03 | 0.03  | 0.06  | 0.08  | -0.03 | -0.09 | 0.08  | 0.06  |
| 11   | 8  | 0.00  | 0.01  | -0.01 | 0.00  | 0.00  | 0.00  | 0.00  | 0.00  | 0.00  |
| 12   | 6  | 0.01  | 0.01  | 0.00  | 0.00  | -0.02 | 0.01  | 0.00  | -0.01 | 0.02  |
| 13   | 1  | -0.03 | -0.05 | 0.06  | -0.03 | 0.14  | -0.16 | -0.07 | 0.06  | -0.07 |
| 14   | 6  | -0.02 | -0.04 | -0.01 | 0.01  | 0.02  | 0.00  | 0.00  | 0.00  | 0.00  |
| 15   | 8  | 0.00  | 0.00  | 0.00  | 0.00  | 0.00  | 0.00  | 0.00  | 0.00  | 0.00  |
| 16   | 6  | -0.07 | 0.02  | -0.05 | -0.04 | 0.01  | -0.02 | 0.01  | 0.00  | 0.01  |
| 17   | 1  | 0.22  | -0.10 | 0.33  | 0.11  | -0.04 | 0.16  | -0.02 | -0.02 | -0.03 |
| 18   | 1  | 0.37  | -0.19 | 0.11  | 0.19  | -0.09 | 0.05  | -0.02 | 0.03  | -0.01 |
| 19   | 1  | 0.34  | 0.11  | 0.19  | 0.16  | 0.05  | 0.09  | 0.00  | -0.02 | -0.05 |
| 20   | 6  | 0.01  | -0.01 | -0.01 | 0.00  | 0.00  | 0.00  | -0.03 | 0.02  | 0.03  |
| 21   | 1  | -0.04 | 0.07  | 0.07  | 0.03  | 0.01  | -0.02 | 0.22  | -0.05 | -0.20 |
| 22   | 6  | -0.02 | 0.01  | -0.03 | -0.02 | 0.02  | -0.03 | 0.00  | 0.00  | 0.00  |
| 23   | 1  | 0.03  | -0.03 | 0.15  | 0.01  | -0.09 | 0.15  | 0.01  | 0.01  | 0.01  |
| 24   | 1  | 0.06  | -0.15 | 0.10  | 0.05  | -0.14 | 0.10  | 0.02  | 0.01  | -0.01 |
| 25   | 1  | 0.11  | 0.00  | 0.15  | 0.16  | -0.04 | 0.14  | 0.00  | -0.01 | -0.01 |
| 26   | 6  | 0.00  | 0.00  | 0.00  | 0.00  | -0.01 | -0.01 | 0.01  | -0.03 | 0.00  |
| 27   | 1  | 0.00  | 0.02  | -0.01 | -0.05 | 0.02  | 0.00  | -0.08 | 0.15  | -0.04 |
| 28   | 1  | 0.02  | -0.01 | 0.01  | -0.03 | 0.02  | 0.00  | 0.00  | 0.08  | 0.04  |
| 29   | 6  | 0.01  | -0.01 | -0.01 | 0.00  | -0.01 | 0.00  | 0.00  | 0.00  | 0.01  |
| 30   | 1  | -0.05 | 0.05  | 0.05  | -0.02 | 0.02  | 0.02  | 0.03  | -0.05 | -0.03 |
| 31   | 1  | -0.02 | 0.06  | 0.06  | -0.01 | 0.03  | 0.02  | 0.00  | -0.01 | -0.02 |
| 32   | 6  | -0.01 | 0.02  | 0.03  | 0.00  | 0.01  | 0.02  | 0.00  | 0.00  | 0.01  |
| 33   | 1  | -0.09 | -0.17 | -0.06 | -0.06 | -0.10 | -0.04 | -0.02 | -0.03 | -0.01 |
| 34   | 6  | 0.03  | 0.02  | -0.03 | 0.02  | 0.01  | -0.02 | 0.01  | 0.00  | -0.01 |



|    |   |       |       |       |       |       |       |       |       |       |
|----|---|-------|-------|-------|-------|-------|-------|-------|-------|-------|
| 35 | 1 | -0.13 | -0.12 | 0.09  | -0.08 | -0.07 | 0.05  | -0.03 | -0.02 | 0.02  |
| 36 | 6 | 0.01  | -0.01 | 0.05  | -0.02 | 0.01  | -0.09 | 0.01  | 0.00  | -0.03 |
| 37 | 1 | -0.08 | 0.11  | -0.20 | 0.09  | -0.21 | 0.35  | -0.06 | -0.12 | 0.12  |
| 38 | 1 | -0.11 | -0.07 | -0.21 | 0.19  | 0.13  | 0.38  | -0.07 | 0.13  | 0.15  |
| 39 | 1 | 0.04  | 0.03  | -0.23 | -0.06 | -0.09 | 0.37  | 0.00  | 0.02  | 0.06  |
| 40 | 6 | 0.00  | 0.00  | 0.00  | 0.03  | 0.01  | 0.01  | 0.06  | 0.01  | 0.03  |
| 41 | 1 | 0.00  | 0.01  | -0.01 | -0.17 | -0.01 | -0.05 | -0.26 | -0.01 | -0.07 |
| 42 | 6 | 0.00  | -0.01 | 0.02  | 0.01  | 0.01  | -0.03 | 0.01  | -0.01 | 0.00  |
| 43 | 1 | 0.05  | 0.06  | -0.07 | -0.07 | -0.08 | 0.10  | -0.05 | 0.04  | 0.03  |
| 44 | 1 | 0.01  | -0.01 | -0.09 | -0.02 | 0.01  | 0.14  | -0.03 | -0.01 | -0.01 |
| 45 | 1 | -0.02 | 0.04  | -0.08 | 0.03  | -0.05 | 0.12  | 0.02  | 0.03  | 0.00  |
| 46 | 6 | -0.01 | 0.02  | 0.00  | 0.02  | -0.03 | 0.00  | -0.18 | 0.23  | 0.02  |
| 47 | 1 | 0.05  | -0.04 | 0.02  | -0.08 | 0.05  | -0.03 | 0.50  | -0.28 | 0.17  |
| 48 | 6 | 0.00  | -0.01 | -0.01 | 0.00  | 0.01  | 0.01  | 0.02  | -0.08 | -0.02 |
| 49 | 1 | 0.02  | 0.00  | 0.02  | -0.04 | -0.01 | -0.03 | 0.18  | 0.18  | 0.07  |
| 50 | 1 | 0.04  | 0.02  | 0.03  | -0.04 | -0.02 | -0.03 | 0.05  | 0.09  | 0.17  |
| 51 | 6 | 0.02  | 0.01  | 0.02  | -0.01 | -0.01 | -0.01 | -0.01 | 0.00  | -0.02 |
| 52 | 1 | -0.11 | -0.04 | -0.09 | 0.06  | 0.03  | 0.05  | 0.03  | 0.01  | 0.01  |
| 53 | 6 | 0.02  | 0.02  | 0.02  | -0.01 | -0.01 | -0.01 | 0.01  | 0.00  | 0.01  |
| 54 | 1 | -0.03 | 0.00  | -0.03 | 0.02  | 0.00  | 0.02  | -0.01 | -0.01 | -0.01 |
| 55 | 6 | -0.01 | -0.01 | 0.00  | 0.00  | 0.01  | 0.00  | 0.00  | 0.00  | 0.00  |
| 56 | 1 | -0.02 | 0.02  | -0.02 | 0.01  | -0.01 | 0.01  | -0.01 | 0.02  | -0.01 |
| 57 | 6 | 0.00  | 0.02  | 0.00  | 0.00  | -0.01 | 0.00  | 0.01  | -0.01 | 0.01  |
| 58 | 1 | -0.01 | 0.02  | -0.01 | 0.01  | -0.01 | 0.01  | -0.04 | 0.00  | -0.04 |
| 59 | 8 | 0.00  | 0.00  | 0.00  | 0.00  | 0.00  | 0.00  | 0.00  | 0.01  | -0.01 |
| 60 | 8 | 0.00  | 0.00  | 0.00  | 0.00  | 0.01  | 0.01  | 0.00  | 0.00  | 0.00  |
| 61 | 8 | 0.00  | 0.00  | 0.00  | 0.00  | 0.00  | -0.01 | -0.02 | -0.04 | 0.06  |
| 62 | 6 | 0.00  | 0.00  | 0.00  | 0.00  | 0.00  | 0.00  | 0.00  | 0.01  | 0.00  |
| 63 | 6 | 0.00  | 0.00  | 0.00  | 0.00  | 0.00  | 0.00  | 0.00  | 0.00  | 0.00  |
| 64 | 6 | 0.00  | 0.00  | 0.00  | 0.00  | 0.00  | 0.00  | 0.00  | 0.00  | 0.00  |
| 65 | 8 | 0.00  | 0.00  | 0.00  | 0.00  | 0.00  | 0.00  | 0.00  | 0.00  | 0.00  |
| 66 | 1 | 0.00  | 0.01  | 0.00  | 0.00  | -0.01 | 0.00  | 0.00  | 0.00  | 0.00  |
| 67 | 6 | 0.00  | 0.00  | 0.00  | 0.00  | 0.00  | 0.00  | 0.00  | 0.00  | 0.00  |
| 68 | 1 | 0.00  | 0.01  | 0.00  | 0.00  | 0.00  | 0.00  | 0.00  | 0.00  | 0.00  |
| 69 | 1 | 0.00  | 0.02  | 0.00  | 0.00  | -0.02 | 0.01  | 0.00  | -0.01 | 0.01  |
| 70 | 1 | 0.01  | 0.01  | 0.01  | -0.02 | -0.01 | -0.01 | -0.01 | 0.00  | 0.00  |
| 71 | 6 | 0.01  | 0.00  | -0.01 | -0.01 | 0.00  | 0.01  | 0.00  | 0.00  | 0.00  |
| 72 | 1 | -0.01 | 0.02  | 0.04  | 0.02  | -0.02 | -0.07 | 0.01  | -0.02 | -0.01 |
| 73 | 1 | -0.05 | 0.02  | 0.02  | 0.07  | -0.01 | -0.03 | -0.01 | 0.02  | 0.01  |
| 74 | 1 | -0.02 | -0.01 | 0.05  | 0.03  | 0.01  | -0.05 | 0.02  | 0.01  | 0.02  |

157

158

159

A

A

A

|                |           |           |           |
|----------------|-----------|-----------|-----------|
| Frequencies -- | 1432.3470 | 1441.0254 | 1459.7847 |
| Red. masses -- | 1.4988    | 1.8012    | 1.3625    |
| Frc consts --  | 1.8117    | 2.2037    | 1.7107    |
| IR Inten --    | 13.1700   | 8.4482    | 4.0997    |
| Raman Activ -- | 2.5850    | 14.8596   | 2.0734    |
| Depolar (P) -- | 0.7017    | 0.2464    | 0.7087    |
| Depolar (U) -- | 0.8247    | 0.3954    | 0.8295    |

| Atom | AN | X | Y | Z | X | Y | Z | X | Y | Z |
|------|----|---|---|---|---|---|---|---|---|---|
|------|----|---|---|---|---|---|---|---|---|---|

|   |   |      |       |      |      |       |       |      |      |      |
|---|---|------|-------|------|------|-------|-------|------|------|------|
| 1 | 6 | 0.03 | -0.01 | 0.00 | 0.00 | -0.02 | -0.01 | 0.04 | 0.02 | 0.03 |
|---|---|------|-------|------|------|-------|-------|------|------|------|

|   |   |       |      |      |       |      |      |      |      |      |
|---|---|-------|------|------|-------|------|------|------|------|------|
| 2 | 6 | -0.01 | 0.00 | 0.01 | -0.01 | 0.01 | 0.01 | 0.00 | 0.00 | 0.00 |
|---|---|-------|------|------|-------|------|------|------|------|------|

|    |   |       |       |       |       |       |       |       |       |       |
|----|---|-------|-------|-------|-------|-------|-------|-------|-------|-------|
| 3  | 6 | -0.04 | -0.02 | 0.00  | 0.10  | 0.07  | -0.01 | 0.00  | 0.00  | 0.00  |
| 4  | 6 | 0.02  | -0.01 | 0.00  | -0.03 | 0.00  | 0.00  | 0.00  | 0.00  | 0.00  |
| 5  | 6 | -0.04 | 0.03  | 0.03  | 0.02  | -0.01 | -0.01 | 0.00  | 0.00  | 0.00  |
| 6  | 6 | 0.01  | 0.00  | -0.01 | -0.01 | -0.02 | 0.01  | 0.00  | 0.00  | 0.00  |
| 7  | 8 | 0.00  | 0.00  | 0.00  | 0.00  | 0.00  | 0.00  | 0.00  | 0.01  | 0.00  |
| 8  | 6 | -0.03 | 0.00  | -0.06 | -0.01 | -0.01 | -0.03 | -0.01 | 0.02  | -0.02 |
| 9  | 6 | 0.05  | -0.06 | -0.03 | 0.03  | -0.04 | -0.02 | -0.03 | 0.07  | 0.01  |
| 10 | 1 | -0.17 | 0.21  | 0.13  | -0.08 | 0.15  | 0.06  | 0.09  | -0.25 | -0.10 |
| 11 | 8 | 0.00  | 0.01  | 0.01  | 0.00  | 0.00  | 0.01  | 0.00  | 0.00  | 0.00  |
| 12 | 6 | 0.00  | 0.00  | 0.02  | 0.01  | 0.00  | 0.01  | -0.01 | -0.01 | -0.01 |
| 13 | 1 | -0.11 | 0.06  | -0.05 | -0.10 | 0.03  | -0.04 | 0.11  | -0.03 | 0.02  |
| 14 | 6 | 0.00  | 0.00  | 0.00  | 0.00  | 0.00  | 0.00  | 0.00  | 0.00  | 0.00  |
| 15 | 8 | 0.00  | 0.00  | 0.00  | 0.00  | 0.00  | 0.00  | 0.00  | 0.00  | 0.00  |
| 16 | 6 | 0.01  | 0.00  | 0.03  | 0.00  | 0.00  | 0.01  | 0.00  | -0.01 | 0.02  |
| 17 | 1 | -0.03 | -0.04 | -0.05 | 0.00  | -0.02 | 0.01  | 0.01  | -0.01 | 0.03  |
| 18 | 1 | -0.03 | 0.08  | -0.04 | 0.03  | 0.02  | -0.01 | 0.00  | 0.13  | -0.09 |
| 19 | 1 | 0.01  | -0.05 | -0.12 | 0.03  | -0.01 | -0.04 | 0.01  | -0.06 | -0.14 |
| 20 | 6 | -0.07 | 0.04  | 0.07  | -0.04 | 0.03  | 0.04  | -0.04 | -0.14 | 0.00  |
| 21 | 1 | 0.56  | -0.09 | -0.51 | 0.26  | -0.11 | -0.26 | 0.33  | 0.78  | -0.04 |
| 22 | 6 | -0.01 | 0.00  | -0.01 | -0.02 | 0.02  | -0.02 | -0.03 | -0.01 | -0.02 |
| 23 | 1 | 0.02  | 0.03  | 0.05  | 0.00  | -0.06 | 0.11  | 0.09  | 0.14  | 0.11  |
| 24 | 1 | 0.08  | -0.02 | -0.02 | 0.05  | -0.12 | 0.08  | 0.14  | -0.07 | -0.01 |
| 25 | 1 | 0.02  | -0.02 | 0.00  | 0.12  | -0.02 | 0.10  | -0.01 | 0.03  | 0.07  |
| 26 | 6 | -0.01 | -0.01 | -0.01 | 0.02  | 0.04  | 0.03  | 0.00  | 0.00  | 0.00  |
| 27 | 1 | -0.07 | 0.03  | 0.00  | 0.18  | -0.13 | 0.02  | 0.02  | 0.00  | -0.01 |
| 28 | 1 | 0.01  | -0.01 | 0.00  | 0.00  | -0.03 | -0.02 | 0.01  | 0.01  | 0.01  |
| 29 | 6 | 0.00  | 0.00  | 0.01  | 0.00  | 0.00  | 0.01  | 0.00  | 0.00  | 0.01  |
| 30 | 1 | 0.07  | -0.09 | -0.07 | 0.03  | -0.04 | -0.03 | 0.08  | 0.01  | -0.05 |
| 31 | 1 | -0.02 | 0.02  | -0.04 | -0.01 | 0.01  | -0.02 | -0.03 | 0.03  | -0.11 |
| 32 | 6 | 0.00  | 0.01  | 0.02  | 0.00  | 0.01  | 0.01  | 0.00  | 0.00  | 0.00  |
| 33 | 1 | -0.03 | -0.06 | -0.02 | -0.02 | -0.03 | -0.01 | 0.01  | 0.02  | 0.01  |
| 34 | 6 | 0.01  | 0.01  | -0.01 | 0.01  | 0.00  | -0.01 | -0.01 | -0.01 | 0.00  |
| 35 | 1 | -0.05 | -0.04 | 0.03  | -0.01 | -0.01 | 0.00  | 0.00  | 0.01  | -0.01 |
| 36 | 6 | 0.00  | 0.00  | 0.03  | 0.00  | 0.00  | -0.02 | 0.00  | 0.00  | -0.01 |
| 37 | 1 | -0.02 | 0.09  | -0.13 | 0.01  | -0.05 | 0.07  | -0.03 | -0.03 | 0.02  |
| 38 | 1 | 0.00  | -0.08 | -0.14 | 0.03  | 0.05  | 0.10  | 0.00  | 0.02  | 0.04  |
| 39 | 1 | 0.01  | -0.02 | -0.12 | -0.01 | -0.01 | 0.11  | 0.00  | -0.02 | 0.00  |
| 40 | 6 | 0.06  | 0.01  | 0.03  | -0.17 | -0.03 | -0.08 | -0.01 | 0.00  | 0.00  |
| 41 | 1 | -0.27 | 0.01  | -0.10 | 0.70  | -0.01 | 0.23  | 0.04  | 0.00  | 0.02  |
| 42 | 6 | 0.00  | 0.00  | 0.00  | 0.00  | 0.00  | 0.02  | 0.00  | 0.00  | 0.00  |
| 43 | 1 | -0.02 | 0.01  | 0.01  | 0.04  | 0.05  | -0.06 | 0.01  | 0.04  | -0.03 |
| 44 | 1 | 0.03  | 0.00  | -0.02 | 0.01  | -0.01 | -0.10 | -0.05 | 0.0   |       |

|    |   |       |       |       |       |       |      |       |       |       |
|----|---|-------|-------|-------|-------|-------|------|-------|-------|-------|
| 55 | 6 | 0.00  | 0.00  | 0.00  | 0.00  | 0.00  | 0.00 | 0.00  | 0.00  | 0.00  |
| 56 | 1 | 0.00  | 0.00  | 0.00  | 0.00  | 0.00  | 0.00 | 0.00  | 0.00  | 0.00  |
| 57 | 6 | 0.00  | 0.00  | 0.00  | 0.00  | 0.00  | 0.00 | 0.00  | 0.00  | 0.00  |
| 58 | 1 | 0.01  | 0.00  | 0.01  | 0.00  | 0.00  | 0.00 | 0.00  | 0.00  | 0.00  |
| 59 | 8 | 0.00  | 0.01  | -0.01 | 0.00  | -0.03 | 0.03 | 0.00  | 0.00  | 0.00  |
| 60 | 8 | 0.00  | 0.00  | 0.00  | 0.00  | 0.00  | 0.00 | 0.00  | 0.00  | 0.00  |
| 61 | 8 | 0.00  | 0.01  | -0.01 | 0.00  | 0.00  | 0.00 | 0.00  | 0.00  | 0.00  |
| 62 | 6 | 0.00  | 0.01  | 0.00  | 0.00  | 0.01  | 0.00 | 0.00  | -0.01 | 0.00  |
| 63 | 6 | 0.00  | 0.00  | 0.00  | 0.00  | 0.00  | 0.00 | 0.00  | 0.00  | 0.00  |
| 64 | 6 | 0.00  | 0.00  | 0.00  | 0.00  | 0.00  | 0.00 | 0.00  | 0.00  | 0.00  |
| 65 | 8 | 0.00  | 0.00  | 0.00  | 0.00  | 0.00  | 0.00 | 0.00  | 0.00  | 0.00  |
| 66 | 1 | 0.00  | 0.01  | 0.00  | 0.00  | 0.01  | 0.00 | 0.00  | 0.00  | 0.00  |
| 67 | 6 | 0.00  | 0.00  | 0.00  | 0.00  | 0.00  | 0.00 | 0.00  | 0.00  | 0.00  |
| 68 | 1 | 0.00  | 0.00  | 0.00  | 0.00  | 0.00  | 0.00 | 0.00  | -0.02 | 0.00  |
| 69 | 1 | 0.00  | -0.01 | 0.01  | 0.00  | 0.00  | 0.01 | 0.00  | 0.01  | -0.02 |
| 70 | 1 | -0.01 | 0.00  | 0.00  | -0.01 | 0.00  | 0.00 | 0.03  | 0.00  | -0.01 |
| 71 | 6 | 0.00  | 0.00  | 0.00  | 0.00  | 0.00  | 0.00 | 0.00  | 0.00  | 0.00  |
| 72 | 1 | 0.00  | 0.00  | -0.01 | 0.00  | 0.00  | 0.00 | 0.00  | 0.00  | 0.02  |
| 73 | 1 | 0.01  | 0.01  | 0.00  | 0.00  | 0.01  | 0.00 | -0.01 | -0.03 | 0.00  |
| 74 | 1 | 0.00  | 0.00  | 0.01  | 0.00  | 0.00  | 0.01 | 0.00  | 0.00  | -0.02 |

|    |   |       |       |       |       |       |       |       |       |       |
|----|---|-------|-------|-------|-------|-------|-------|-------|-------|-------|
| 23 | 1 | 0.00  | 0.00  | 0.00  | 0.00  | 0.00  | 0.00  | 0.01  | 0.02  | 0.00  |
| 24 | 1 | 0.00  | 0.00  | 0.00  | 0.00  | 0.00  | 0.00  | 0.00  | -0.01 | 0.01  |
| 25 | 1 | 0.00  | 0.00  | 0.00  | 0.00  | 0.00  | 0.00  | -0.01 | 0.01  | 0.01  |
| 26 | 6 | 0.00  | 0.00  | 0.00  | 0.00  | 0.00  | 0.00  | 0.06  | 0.04  | 0.00  |
| 27 | 1 | -0.01 | 0.00  | 0.00  | 0.00  | 0.00  | 0.00  | -0.38 | -0.29 | 0.38  |
| 28 | 1 | 0.00  | 0.00  | 0.00  | 0.00  | 0.00  | 0.00  | -0.37 | -0.29 | -0.37 |
| 29 | 6 | 0.00  | 0.00  | 0.00  | 0.00  | 0.00  | 0.00  | 0.00  | 0.00  | 0.00  |
| 30 | 1 | 0.00  | -0.01 | 0.00  | 0.00  | 0.00  | 0.00  | 0.00  | 0.00  | 0.00  |
| 31 | 1 | 0.00  | 0.00  | 0.01  | 0.00  | 0.00  | 0.00  | 0.00  | 0.00  | -0.01 |
| 32 | 6 | 0.00  | 0.00  | 0.00  | 0.00  | 0.00  | 0.00  | 0.00  | 0.00  | 0.00  |
| 33 | 1 | 0.00  | 0.00  | 0.00  | 0.00  | 0.00  | 0.00  | 0.00  | 0.00  | 0.00  |
| 34 | 6 | 0.00  | 0.00  | 0.00  | 0.00  | 0.00  | 0.00  | 0.00  | 0.00  | 0.00  |
| 35 | 1 | 0.00  | 0.00  | 0.00  | 0.00  | 0.00  | 0.00  | 0.00  | 0.00  | 0.00  |
| 36 | 6 | 0.00  | 0.00  | 0.00  | 0.00  | 0.00  | 0.00  | 0.00  | 0.00  | 0.00  |
| 37 | 1 | 0.00  | 0.00  | 0.00  | 0.00  | 0.00  | 0.00  | 0.00  | -0.01 | 0.02  |
| 38 | 1 | 0.00  | 0.00  | 0.00  | 0.00  | 0.00  | 0.00  | -0.02 | 0.02  | 0.01  |
| 39 | 1 | 0.00  | 0.00  | 0.00  | 0.00  | 0.00  | 0.00  | 0.00  | 0.02  | -0.01 |
| 40 | 6 | 0.00  | 0.00  | 0.00  | 0.00  | 0.00  | 0.00  | 0.01  | 0.01  | 0.00  |
| 41 | 1 | 0.00  | 0.00  | 0.00  | 0.00  | 0.00  | 0.00  | -0.01 | 0.00  | 0.01  |
| 42 | 6 | 0.00  | 0.00  | 0.00  | 0.00  | 0.00  | 0.00  | -0.03 | 0.01  | 0.01  |
| 43 | 1 | 0.00  | -0.01 | 0.01  | 0.00  | 0.00  | 0.00  | 0.13  | -0.27 | 0.02  |
| 44 | 1 | 0.03  | 0.00  | 0.00  | 0.01  | 0.00  | 0.00  | 0.30  | 0.03  | 0.12  |
| 45 | 1 | 0.00  | 0.02  | 0.00  | 0.00  | 0.00  | 0.00  | -0.03 | 0.14  | -0.18 |
| 46 | 6 | 0.00  | 0.00  | 0.00  | 0.00  | 0.00  | 0.00  | 0.00  | 0.01  | 0.00  |
| 47 | 1 | 0.01  | -0.01 | 0.00  | 0.00  | 0.00  | -0.01 | 0.01  | -0.01 | 0.01  |
| 48 | 6 | 0.00  | 0.00  | 0.00  | 0.00  | 0.00  | 0.00  | 0.00  | 0.00  | 0.00  |
| 49 | 1 | 0.00  | -0.01 | 0.01  | 0.00  | 0.00  | 0.00  | 0.01  | -0.01 | 0.02  |
| 50 | 1 | 0.01  | 0.00  | 0.00  | 0.00  | 0.00  | 0.00  | 0.03  | 0.00  | 0.00  |
| 51 | 6 | 0.00  | 0.00  | 0.00  | 0.00  | 0.00  | 0.00  | 0.01  | 0.00  | 0.00  |
| 52 | 1 | 0.00  | 0.00  | 0.00  | 0.00  | 0.00  | 0.00  | -0.04 | 0.01  | -0.01 |
| 53 | 6 | 0.00  | 0.00  | 0.00  | 0.00  | 0.00  | 0.00  | 0.00  | 0.00  | 0.00  |
| 54 | 1 | 0.00  | 0.00  | 0.00  | 0.00  | 0.00  | 0.00  | 0.00  | 0.00  | 0.00  |
| 55 | 6 | 0.00  | 0.00  | 0.00  | 0.00  | 0.00  | 0.00  | 0.00  | 0.00  | 0.00  |
| 56 | 1 | 0.00  | 0.00  | 0.00  | 0.00  | 0.00  | 0.00  | 0.00  | 0.00  | 0.00  |
| 57 | 6 | 0.00  | 0.00  | 0.00  | 0.00  | 0.00  | 0.00  | 0.00  | 0.00  | 0.00  |
| 58 | 1 | 0.00  | 0.00  | 0.00  | 0.00  | 0.00  | 0.00  | -0.01 | 0.00  | 0.00  |
| 59 | 8 | 0.00  | 0.00  | 0.00  | 0.00  | 0.00  | 0.00  | 0.00  | 0.00  | 0.00  |
| 60 | 8 | 0.00  | 0.00  | 0.00  | 0.00  | 0.00  | 0.00  | 0.00  | 0.00  | 0.00  |
| 61 | 8 | 0.00  | 0.00  | 0.00  | 0.00  | 0.00  | 0.00  | 0.00  | 0.00  | 0.00  |
| 62 | 6 | 0.00  | 0.00  | 0.01  | 0.00  | 0.00  | 0.00  | 0.00  | 0.00  | 0.00  |
| 63 | 6 | -0.03 | -0.02 | 0.03  | -0.01 | -0.01 | 0.00  | 0.00  | 0.00  | 0.00  |
| 64 | 6 | 0.01  | 0.01  | 0.00  | -0.01 | 0.01  | -0.01 | 0.00  | 0.00  | 0.00  |
| 65 | 8 | 0.00  | 0.00  | -0.01 | 0.00  | 0.00  | 0.00  | 0.00  | 0.00  | 0.00  |
| 66 | 1 | 0.02  | 0.05  | -0.01 | 0.03  | -0.03 | 0.03  | 0.00  | 0.00  | 0.00  |
| 67 | 6 | -0.02 | 0.01  | 0.05  | -0.04 | 0.03  | -0.02 | 0.00  | 0.00  | 0.00  |
| 68 | 1 | -0.30 | -0.33 | -0.11 | 0.38  | -0.41 | 0.41  | 0.00  | 0.01  | 0.00  |
| 69 | 1 | 0.17  | 0.20  | -0.52 | -0.13 | 0.24  | 0.28  | 0.00  | -0.01 | 0.01  |
| 70 | 1 | 0.48  | 0.03  | -0.03 | 0.35  | -0.26 | -0.37 | -0.02 | 0.00  | 0.00  |
| 71 | 6 | 0.02  | 0.01  | 0.01  | 0.00  | 0.01  | -0.01 | 0.00  | 0.00  | 0.00  |
| 72 | 1 | -0.12 | 0.19  | 0.00  | 0.07  | -0.10 | 0.09  | 0.00  | 0.00  | 0.01  |
| 73 | 1 | 0.12  | -0.18 | -0.09 | -0.08 | -0.07 | 0.01  | 0.00  | -0.01 | 0.00  |
| 74 | 1 | -0.24 | -0.08 | -0.20 | 0.07  | 0.03  | -0.02 | 0.00  | 0.00  | -0.01 |

|                |    |  | 163       |       |       | 164       |       |       | 165       |       |       |
|----------------|----|--|-----------|-------|-------|-----------|-------|-------|-----------|-------|-------|
|                |    |  | A         |       |       | A         |       |       | A         |       |       |
| Frequencies -- |    |  | 1481.7402 |       |       | 1485.6820 |       |       | 1488.1057 |       |       |
| Red. masses -- |    |  | 1.0998    |       |       | 1.0717    |       |       | 1.0535    |       |       |
| Frc consts --  |    |  | 1.4227    |       |       | 1.3937    |       |       | 1.3746    |       |       |
| IR Inten --    |    |  | 4.3280    |       |       | 6.7043    |       |       | 5.2919    |       |       |
| Raman Activ -- |    |  | 14.1082   |       |       | 7.8167    |       |       | 16.1909   |       |       |
| Depolar (P) -- |    |  | 0.7480    |       |       | 0.7358    |       |       | 0.6943    |       |       |
| Depolar (U) -- |    |  | 0.8558    |       |       | 0.8478    |       |       | 0.8196    |       |       |
| Atom           | AN |  | X         | Y     | Z     | X         | Y     | Z     | X         | Y     | Z     |
| 1              | 6  |  | 0.00      | 0.00  | 0.00  | -0.02     | -0.02 | 0.00  | 0.00      | 0.01  | 0.01  |
| 2              | 6  |  | 0.00      | 0.00  | 0.00  | 0.00      | 0.00  | 0.00  | 0.00      | 0.00  | 0.00  |
| 3              | 6  |  | 0.00      | 0.00  | 0.00  | 0.00      | 0.00  | 0.00  | 0.00      | 0.00  | 0.00  |
| 4              | 6  |  | 0.00      | 0.00  | 0.00  | 0.01      | 0.01  | 0.00  | -0.01     | 0.00  | 0.00  |
| 5              | 6  |  | -0.01     | 0.01  | 0.01  | 0.00      | 0.00  | 0.00  | 0.01      | 0.00  | -0.01 |
| 6              | 6  |  | 0.00      | 0.01  | 0.00  | 0.00      | 0.00  | 0.00  | 0.00      | 0.00  | 0.00  |
| 7              | 8  |  | 0.00      | 0.00  | 0.00  | 0.00      | 0.00  | 0.00  | 0.00      | 0.00  | 0.00  |
| 8              | 6  |  | 0.00      | 0.00  | 0.00  | -0.01     | -0.01 | 0.02  | -0.01     | -0.02 | 0.00  |
| 9              | 6  |  | 0.00      | 0.00  | 0.00  | 0.00      | -0.01 | 0.00  | 0.00      | 0.00  | 0.00  |
| 10             | 1  |  | 0.00      | 0.01  | 0.00  | 0.00      | 0.02  | 0.01  | -0.01     | -0.01 | 0.00  |
| 11             | 8  |  | 0.00      | 0.00  | 0.00  | 0.00      | 0.00  | 0.00  | 0.00      | 0.00  | 0.00  |
| 12             | 6  |  | 0.00      | 0.00  | 0.00  | 0.00      | 0.00  | 0.00  | 0.00      | 0.00  | 0.00  |
| 13             | 1  |  | 0.00      | 0.00  | 0.00  | -0.02     | 0.00  | -0.01 | 0.00      | -0.01 | 0.02  |
| 14             | 6  |  | 0.00      | 0.00  | 0.00  | 0.00      | 0.00  | 0.00  | 0.00      | 0.00  | 0.00  |
| 15             | 8  |  | 0.00      | 0.00  | 0.00  | 0.00      | 0.00  | 0.00  | 0.00      | 0.00  | 0.00  |
| 16             | 6  |  | 0.00      | 0.00  | 0.00  | -0.01     | -0.01 | 0.02  | -0.01     | -0.04 | 0.00  |
| 17             | 1  |  | 0.00      | 0.01  | 0.00  | 0.13      | 0.04  | 0.23  | 0.06      | 0.40  | 0.24  |
| 18             | 1  |  | 0.01      | 0.00  | 0.00  | 0.12      | 0.30  | -0.23 | 0.35      | 0.20  | -0.18 |
| 19             | 1  |  | 0.00      | 0.00  | 0.00  | 0.01      | -0.11 | -0.30 | -0.24     | -0.06 | -0.07 |
| 20             | 6  |  | 0.00      | 0.00  | 0.00  | 0.02      | 0.03  | -0.01 | 0.00      | 0.00  | 0.00  |
| 21             | 1  |  | 0.01      | 0.00  | -0.01 | -0.12     | -0.13 | 0.06  | 0.01      | 0.03  | 0.00  |
| 22             | 6  |  | 0.00      | 0.00  | 0.00  | -0.03     | -0.01 | 0.01  | 0.00      | 0.02  | 0.02  |
| 23             | 1  |  | -0.01     | -0.02 | 0.00  | 0.15      | 0.17  | 0.25  | -0.11     | -0.28 | 0.04  |
| 24             | 1  |  | -0.01     | 0.01  | 0.00  | 0.38      | 0.03  | -0.13 | -0.04     | 0.18  | -0.13 |
| 25             | 1  |  | 0.01      | -0.01 | 0.00  | -0.11     | -0.05 | -0.23 | 0.20      | -0.24 | -0.19 |
| 26             | 6  |  | 0.00      | 0.00  | 0.00  | 0.00      | 0.00  | 0.00  | 0.00      | 0.00  | 0.00  |
| 27             | 1  |  | -0.02     | -0.03 | 0.02  | 0.02      | 0.01  | -0.02 | -0.01     | -0.01 | 0.01  |
| 28             | 1  |  | -0.02     | -0.01 | -0.02 | 0.01      | 0.01  | 0.02  | -0.01     | -0.01 | -0.01 |
| 29             | 6  |  | 0.00      | 0.00  | 0.00  | 0.00      | 0.00  | -0.01 | 0.00      | 0.00  | 0.01  |
| 30             | 1  |  | 0.00      | 0.00  | 0.00  | -0.04     | -0.01 | 0.03  | 0.05      | 0.01  | -0.03 |
| 31             | 1  |  | 0.00      | 0.00  | 0.00  | 0.01      | 0.00  | 0.05  | -0.02     | 0.02  | -0.06 |
| 32             | 6  |  | 0.00      | 0.00  | 0.00  | 0.00      | -0.01 | 0.00  | 0.00      | 0.00  | 0.00  |
| 33             | 1  |  | 0.00      | 0.00  | 0.00  | -0.01     | -0.01 | -0.01 | -0.01     | -0.02 | 0.00  |
| 34             | 6  |  | 0.00      | 0.00  | 0.00  | 0.00      | 0.00  | 0.00  | 0.01      | 0.01  | 0.00  |
| 35             | 1  |  | 0.00      | 0.00  | 0.00  | 0.01      | 0.01  | 0.00  | -0.01     | -0.01 | 0.01  |
| 36             | 6  |  | 0.00      | 0.00  | 0.00  | 0.02      | 0.02  | 0.00  | -0.02     | -0.01 | 0.00  |
| 37             | 1  |  | 0.04      | 0.03  | -0.02 | -0.33     | -0.09 | -0.04 | 0.29      | 0.14  | -0.05 |
| 38             | 1  |  | 0.03      | -0.03 | -0.03 | 0.08      | 0.06  | 0.16  | 0.07      | -0.13 | -0.16 |
| 39             | 1  |  | -0.01     | 0.01  | 0.03  | 0.00      | -0.31 | -0.16 | -0.02     | 0.15  | 0.20  |
| 40             | 6  |  | 0.00      | 0.00  | 0.00  | 0.00      | 0.00  | 0.00  | 0.00      | 0.00  | 0.00  |
| 41             | 1  |  | 0.00      | 0.00  | 0.00  | 0.01      | 0.00  | 0.01  | 0.00      | 0.00  | 0.00  |
| 42             | 6  |  | 0.00      | 0.01  | 0.01  | 0.00      | 0.00  | 0.00  | 0.00      | 0.00  | 0.00  |

|    |   |       |       |       |       |       |       |       |       |       |
|----|---|-------|-------|-------|-------|-------|-------|-------|-------|-------|
| 43 | 1 | 0.13  | -0.01 | -0.11 | 0.02  | -0.04 | 0.00  | -0.01 | 0.01  | 0.01  |
| 44 | 1 | -0.11 | 0.00  | 0.04  | 0.03  | 0.00  | 0.03  | 0.00  | 0.00  | -0.01 |
| 45 | 1 | -0.07 | -0.16 | -0.11 | -0.01 | 0.00  | -0.02 | 0.01  | 0.01  | 0.01  |
| 46 | 6 | 0.00  | -0.02 | -0.01 | 0.00  | 0.00  | 0.00  | 0.00  | 0.01  | 0.00  |
| 47 | 1 | -0.02 | -0.02 | 0.00  | 0.00  | -0.01 | 0.00  | 0.01  | 0.00  | 0.00  |
| 48 | 6 | 0.05  | -0.06 | 0.01  | 0.00  | 0.00  | 0.00  | 0.00  | 0.00  | 0.00  |
| 49 | 1 | -0.08 | 0.56  | -0.35 | 0.00  | 0.02  | -0.01 | 0.01  | -0.03 | 0.02  |
| 50 | 1 | -0.54 | 0.28  | 0.28  | -0.02 | 0.01  | 0.01  | 0.03  | -0.01 | -0.01 |
| 51 | 6 | 0.01  | 0.00  | 0.00  | 0.00  | 0.00  | 0.00  | 0.00  | 0.00  | 0.00  |
| 52 | 1 | -0.03 | 0.02  | 0.00  | 0.00  | 0.00  | 0.00  | 0.00  | 0.00  | 0.00  |
| 53 | 6 | 0.00  | 0.00  | 0.00  | 0.00  | 0.00  | 0.00  | 0.00  | 0.00  | 0.00  |
| 54 | 1 | 0.00  | 0.00  | 0.00  | 0.00  | 0.00  | 0.00  | 0.00  | 0.00  | 0.00  |
| 55 | 6 | 0.00  | 0.00  | 0.00  | 0.00  | 0.00  | 0.00  | 0.00  | 0.00  | 0.00  |
| 56 | 1 | 0.00  | -0.01 | 0.00  | 0.00  | 0.00  | 0.00  | 0.00  | 0.00  | 0.00  |
| 57 | 6 | 0.00  | 0.00  | 0.00  | 0.00  | 0.00  | 0.00  | 0.00  | 0.00  | 0.00  |
| 58 | 1 | 0.00  | 0.00  | 0.01  | 0.00  | 0.00  | 0.00  | 0.00  | 0.00  | 0.00  |
| 59 | 8 | 0.00  | 0.00  | 0.00  | 0.00  | 0.00  | 0.00  | 0.00  | 0.00  | 0.00  |
| 60 | 8 | 0.00  | 0.00  | 0.00  | 0.00  | 0.00  | 0.00  | 0.00  | 0.00  | 0.00  |
| 61 | 8 | 0.00  | 0.01  | 0.00  | 0.00  | 0.00  | 0.00  | 0.00  | 0.00  | 0.00  |
| 62 | 6 | 0.00  | 0.00  | 0.00  | 0.00  | 0.00  | 0.00  | 0.00  | 0.00  | 0.00  |
| 63 | 6 | 0.00  | 0.00  | 0.00  | 0.00  | 0.00  | 0.00  | 0.00  | 0.00  | 0.00  |
| 64 | 6 | 0.00  | 0.00  | 0.00  | 0.00  | 0.00  | 0.00  | 0.00  | 0.00  | 0.00  |
| 65 | 8 | 0.00  | 0.00  | 0.00  | 0.00  | 0.00  | 0.00  | 0.00  | 0.00  | 0.00  |
| 66 | 1 | 0.00  | 0.00  | 0.00  | 0.00  | 0.00  | 0.00  | 0.00  | 0.00  | 0.00  |
| 67 | 6 | 0.00  | 0.00  | 0.00  | 0.00  | 0.00  | 0.00  | 0.00  | 0.00  | 0.00  |
| 68 | 1 | -0.01 | -0.02 | 0.00  | 0.01  | 0.00  | 0.01  | 0.00  | 0.00  | 0.00  |
| 69 | 1 | 0.01  | 0.01  | -0.02 | 0.00  | 0.00  | 0.01  | 0.00  | 0.00  | 0.00  |
| 70 | 1 | 0.02  | 0.00  | -0.01 | 0.00  | 0.00  | 0.00  | 0.00  | 0.00  | 0.00  |
| 71 | 6 | 0.00  | 0.00  | 0.00  | 0.00  | 0.00  | 0.00  | 0.00  | 0.00  | 0.00  |
| 72 | 1 | 0.00  | 0.00  | -0.02 | -0.01 | 0.02  | -0.02 | 0.00  | -0.01 | 0.01  |
| 73 | 1 | 0.00  | 0.02  | 0.00  | 0.01  | 0.01  | 0.00  | -0.01 | -0.01 | 0.00  |
| 74 | 1 | 0.00  | 0.00  | 0.02  | -0.01 | -0.01 | 0.01  | 0.01  | 0.00  | 0.00  |

|     |     |     |
|-----|-----|-----|
| 166 | 167 | 168 |
| A   | A   | A   |

|                |           |           |           |
|----------------|-----------|-----------|-----------|
| Frequencies -- | 1490.8318 | 1492.6161 | 1494.1815 |
| Red. masses -- | 1.0625    | 1.0599    | 1.0559    |
| Frc consts --  | 1.3914    | 1.3912    | 1.3890    |
| IR Inten --    | 17.7098   | 9.3270    | 11.4059   |
| Raman Activ -- | 3.4410    | 17.4033   | 9.3344    |
| Depolar (P) -- | 0.7492    | 0.6115    | 0.6538    |
| Depolar (U) -- | 0.8566    | 0.7589    | 0.7906    |

| Atom | AN | X     | Y     | Z     | X     | Y     | Z     | X    | Y     | Z     |
|------|----|-------|-------|-------|-------|-------|-------|------|-------|-------|
| 1    | 6  | 0.00  | 0.00  | 0.00  | 0.00  | 0.00  | 0.00  | 0.00 | 0.00  | 0.01  |
| 2    | 6  | 0.00  | 0.00  | 0.00  | 0.00  | 0.00  | 0.00  | 0.00 | 0.00  | 0.00  |
| 3    | 6  | 0.01  | 0.00  | 0.00  | 0.00  | 0.00  | 0.00  | 0.00 | 0.00  | 0.00  |
| 4    | 6  | 0.00  | 0.00  | 0.00  | 0.00  | 0.00  | 0.00  | 0.00 | 0.01  | 0.00  |
| 5    | 6  | 0.01  | 0.01  | 0.01  | 0.00  | -0.01 | -0.01 | 0.00 | 0.00  | 0.00  |
| 6    | 6  | -0.03 | -0.01 | -0.01 | 0.00  | 0.03  | 0.02  | 0.00 | 0.00  | 0.00  |
| 7    | 8  | 0.00  | 0.00  | 0.00  | 0.00  | 0.00  | 0.00  | 0.00 | 0.00  | 0.00  |
| 8    | 6  | 0.00  | 0.00  | 0.00  | 0.00  | 0.00  | 0.00  | 0.01 | 0.00  | -0.02 |
| 9    | 6  | 0.00  | 0.00  | 0.00  | 0.00  | 0.00  | 0.00  | 0.00 | 0.01  | 0.00  |
| 10   | 1  | 0.01  | -0.01 | -0.01 | -0.01 | 0.01  | 0.01  | 0.02 | -0.03 | -0.01 |

|    |   |       |       |       |       |       |       |       |       |       |
|----|---|-------|-------|-------|-------|-------|-------|-------|-------|-------|
| 11 | 8 | 0.00  | 0.00  | 0.00  | 0.00  | 0.00  | 0.00  | 0.00  | 0.00  | 0.00  |
| 12 | 6 | 0.00  | 0.00  | 0.00  | 0.00  | 0.00  | 0.00  | 0.00  | 0.00  | 0.00  |
| 13 | 1 | 0.01  | -0.01 | 0.02  | -0.02 | 0.02  | -0.02 | 0.00  | 0.00  | 0.00  |
| 14 | 6 | 0.00  | 0.00  | 0.00  | 0.00  | 0.01  | 0.00  | 0.00  | 0.00  | 0.00  |
| 15 | 8 | 0.00  | 0.00  | 0.00  | 0.00  | 0.00  | 0.00  | 0.00  | 0.00  | 0.00  |
| 16 | 6 | 0.00  | 0.00  | 0.00  | 0.00  | 0.00  | 0.00  | 0.02  | 0.00  | -0.03 |
| 17 | 1 | 0.00  | 0.02  | 0.00  | 0.01  | -0.02 | 0.01  | -0.15 | 0.13  | -0.20 |
| 18 | 1 | 0.01  | 0.00  | 0.00  | 0.00  | 0.02  | -0.02 | -0.02 | -0.33 | 0.24  |
| 19 | 1 | -0.01 | 0.00  | 0.01  | 0.02  | -0.01 | -0.03 | -0.12 | 0.14  | 0.4   |
| 20 | 6 | 0.00  | -0.01 | 0.00  | 0.00  | 0.00  | 0.00  | -0.01 | -0.01 | 0.01  |
| 21 | 1 | 0.02  | 0.04  | 0.00  | 0.02  | -0.01 | -0.02 | 0.06  | 0.06  | -0.03 |
| 22 | 6 | 0.00  | 0.00  | 0.00  | 0.00  | 0.00  | 0.00  | -0.02 | 0.01  | 0.02  |
| 23 | 1 | -0.01 | -0.01 | -0.02 | -0.01 | 0.00  | -0.02 | 0.01  | -0.10 | 0.20  |
| 24 | 1 | -0.03 | 0.00  | 0.01  | -0.03 | -0.01 | 0.02  | 0.21  | 0.17  | -0.19 |
| 25 | 1 | 0.01  | 0.01  | 0.02  | 0.00  | 0.01  | 0.03  | 0.09  | -0.22 | -0.29 |
| 26 | 6 | -0.02 | -0.02 | 0.00  | -0.01 | -0.02 | 0.00  | 0.00  | 0.00  | 0.00  |
| 27 | 1 | 0.17  | 0.19  | -0.20 | 0.08  | 0.05  | -0.08 | 0.00  | -0.01 | 0.01  |
| 28 | 1 | 0.19  | 0.15  | 0.19  | 0.06  | 0.09  | 0.08  | -0.01 | 0.00  | -0.01 |
| 29 | 6 | 0.00  | 0.00  | 0.00  | 0.00  | 0.00  | 0.00  | 0.00  | 0.00  | 0.01  |
| 30 | 1 | 0.01  | 0.01  | -0.01 | 0.00  | 0.00  | 0.00  | 0.05  | 0.02  | -0.03 |
| 31 | 1 | 0.00  | 0.00  | -0.02 | 0.00  | 0.00  | 0.00  | -0.01 | 0.00  | -0.06 |
| 32 | 6 | 0.00  | 0.00  | 0.00  | 0.00  | 0.00  | 0.00  | 0.00  | 0.00  | 0.00  |
| 33 | 1 | 0.00  | 0.00  | 0.00  | 0.00  | 0.00  | 0.00  | 0.01  | 0.02  | 0.02  |
| 34 | 6 | 0.00  | 0.00  | 0.00  | 0.00  | 0.00  | 0.00  | 0.00  | 0.00  | 0.00  |
| 35 | 1 | 0.00  | 0.00  | 0.00  | 0.00  | 0.00  | 0.00  | -0.01 | -0.01 | 0.01  |
| 36 | 6 | 0.00  | 0.00  | 0.00  | 0.00  | 0.00  | 0.00  | 0.00  | 0.02  | 0.00  |
| 37 | 1 | 0.03  | 0.00  | 0.01  | 0.04  | 0.01  | 0.01  | -0.18 | 0.00  | -0.09 |
| 38 | 1 | -0.02 | 0.00  | -0.01 | -0.02 | 0.00  | -0.02 | 0.15  | -0.03 | 0.07  |
| 39 | 1 | 0.00  | 0.04  | 0.00  | 0.00  | 0.04  | 0.02  | -0.02 | -0.26 | -0.04 |
| 40 | 6 | -0.01 | -0.01 | 0.00  | 0.00  | 0.00  | 0.00  | 0.00  | 0.00  | 0.00  |
| 41 | 1 | 0.02  | 0.00  | 0.00  | -0.01 | 0.00  | -0.01 | 0.02  | 0.00  | 0.01  |
| 42 | 6 | -0.04 | 0.00  | -0.01 | 0.00  | 0.05  | 0.01  | 0.00  | 0.00  | 0.00  |
| 43 | 1 | 0.02  | -0.42 | 0.19  | 0.44  | -0.32 | -0.22 | 0.03  | -0.02 | -0.01 |
| 44 | 1 | 0.58  | 0.04  | 0.15  | -0.15 | 0.04  | 0.36  | -0.01 | 0.00  | 0.02  |
| 45 | 1 | 0.05  | 0.39  | -0.14 | -0.23 | -0.44 | -0.37 | -0.01 | -0.02 | -0.02 |
| 46 | 6 | 0.00  | -0.01 | 0.00  | 0.00  | 0.01  | 0.00  | 0.00  | 0.00  | 0.00  |
| 47 | 1 | 0.00  | 0.00  | -0.01 | 0.00  | 0.00  | 0.00  | 0.01  | -0.01 | 0.01  |
| 48 | 6 | 0.00  | -0.01 | 0.00  | -0.01 | 0.02  | 0.00  | 0.00  | 0.00  | 0.00  |
| 49 | 1 | -0.01 | 0.09  | -0.05 | 0.02  | -0.14 | 0.08  | 0.00  | 0.00  | 0.00  |
| 50 | 1 | -0.07 | 0.05  | 0.05  | 0.13  | -0.07 | -0.07 | 0.01  | 0.00  | 0.00  |
| 51 | 6 | 0.01  | 0.00  | 0.01  | 0.00  | 0.00  | 0.00  | 0.00  | 0.00  | 0.00  |
| 52 | 1 | -0.01 | 0.00  | -0.01 | 0.00  | 0.00  | 0.00  | 0.00  |       |       |

|    |   |       |       |       |       |       |       |       |       |       |
|----|---|-------|-------|-------|-------|-------|-------|-------|-------|-------|
| 63 | 6 | 0.00  | 0.00  | 0.00  | 0.00  | 0.00  | 0.00  | 0.00  | 0.00  | 0.00  |
| 64 | 6 | 0.00  | 0.00  | 0.00  | 0.00  | 0.00  | 0.00  | 0.00  | 0.00  | 0.00  |
| 65 | 8 | 0.00  | 0.00  | 0.00  | 0.00  | 0.00  | 0.00  | 0.00  | 0.00  | 0.00  |
| 66 | 1 | 0.00  | 0.00  | 0.00  | 0.00  | 0.00  | 0.00  | 0.00  | 0.00  | 0.00  |
| 67 | 6 | 0.00  | 0.00  | 0.00  | 0.00  | 0.00  | 0.00  | 0.00  | 0.00  | -0.01 |
| 68 | 1 | 0.02  | 0.03  | 0.01  | 0.02  | 0.02  | 0.01  | 0.06  | 0.05  | 0.03  |
| 69 | 1 | -0.01 | -0.01 | 0.04  | -0.01 | -0.01 | 0.03  | -0.03 | -0.02 | 0.09  |
| 70 | 1 | -0.03 | 0.00  | 0.00  | -0.02 | 0.00  | 0.00  | -0.06 | -0.01 | 0.00  |
| 71 | 6 | 0.00  | 0.00  | 0.00  | 0.00  | 0.00  | 0.00  | 0.01  | 0.00  | 0.00  |
| 72 | 1 | -0.02 | 0.02  | 0.03  | -0.02 | 0.03  | 0.04  | -0.08 | 0.12  | 0.04  |
| 73 | 1 | 0.00  | -0.05 | -0.01 | 0.00  | -0.07 | -0.01 | 0.04  | -0.10 | -0.04 |
| 74 | 1 | -0.04 | -0.01 | -0.04 | -0.05 | -0.02 | -0.06 | -0.16 | -0.05 | -0.09 |

169

170

171

A

A

A

|                |           |           |           |
|----------------|-----------|-----------|-----------|
| Frequencies -- | 1494.6062 | 1496.0744 | 1498.5877 |
| Red. masses -- | 1.0512    | 1.0510    | 1.0659    |
| Frc consts --  | 1.3835    | 1.3860    | 1.4104    |
| IR Inten --    | 16.7694   | 20.9180   | 19.7850   |
| Raman Activ -- | 18.0139   | 19.3754   | 13.2898   |
| Depolar (P) -- | 0.6020    | 0.6653    | 0.7481    |
| Depolar (U) -- | 0.7516    | 0.7990    | 0.8559    |

| Atom | AN | X     | Y     | Z     | X     | Y     | Z     | X     | Y     | Z     |
|------|----|-------|-------|-------|-------|-------|-------|-------|-------|-------|
| 1    | 6  | 0.00  | 0.00  | 0.00  | 0.00  | 0.00  | 0.00  | -0.01 | -0.01 | 0.00  |
| 2    | 6  | 0.00  | 0.00  | 0.00  | 0.00  | 0.00  | 0.00  | 0.00  | 0.00  | 0.00  |
| 3    | 6  | 0.00  | 0.00  | 0.00  | 0.00  | 0.00  | 0.00  | 0.00  | 0.00  | 0.00  |
| 4    | 6  | 0.00  | 0.00  | 0.00  | 0.00  | 0.00  | 0.00  | -0.02 | 0.00  | 0.01  |
| 5    | 6  | 0.00  | 0.00  | 0.00  | 0.00  | 0.00  | 0.00  | 0.02  | -0.01 | -0.01 |
| 6    | 6  | 0.00  | 0.00  | 0.00  | 0.00  | 0.00  | 0.00  | 0.00  | 0.00  | 0.00  |
| 7    | 8  | 0.00  | 0.00  | 0.00  | 0.00  | 0.00  | 0.00  | 0.00  | 0.00  | 0.00  |
| 8    | 6  | 0.00  | 0.00  | 0.01  | 0.00  | 0.00  | 0.00  | 0.00  | 0.02  | 0.01  |
| 9    | 6  | 0.00  | 0.00  | 0.00  | 0.00  | -0.01 | 0.00  | -0.01 | 0.00  | 0.00  |
| 10   | 1  | -0.01 | 0.01  | 0.01  | -0.01 | 0.01  | 0.00  | 0.07  | 0.02  | -0.03 |
| 11   | 8  | 0.00  | 0.00  | 0.00  | 0.00  | 0.00  | 0.00  | 0.00  | 0.00  | 0.00  |
| 12   | 6  | 0.00  | 0.00  | 0.00  | 0.00  | 0.00  | 0.00  | 0.00  | 0.01  | -0.01 |
| 13   | 1  | 0.00  | 0.02  | -0.02 | -0.05 | 0.03  | -0.04 | 0.00  | -0.04 | 0.04  |
| 14   | 6  | 0.00  | 0.00  | 0.00  | 0.00  | 0.00  | 0.00  | 0.00  | 0.00  | 0.00  |
| 15   | 8  | 0.00  | 0.00  | 0.00  | 0.00  | 0.00  | 0.00  | 0.00  | 0.00  | 0.00  |
| 16   | 6  | -0.01 | 0.00  | 0.01  | 0.00  | 0.00  | 0.00  | 0.00  | 0.02  | 0.01  |
| 17   | 1  | 0.05  | -0.05 | 0.06  | 0.00  | -0.02 | 0.00  | 0.03  | -0.35 | -0.07 |
| 18   | 1  | 0.00  | 0.10  | -0.07 | -0.01 | 0.00  | 0.00  | -0.23 | -0.01 | 0.03  |
| 19   | 1  | 0.04  | -0.04 | -0.13 | 0.01  | 0.00  | 0.00  | 0.26  | -0.01 | -0.12 |
| 20   | 6  | 0.00  | 0.00  | 0.00  | 0.00  | 0.00  | 0.00  | 0.01  | 0.00  | -0.01 |
| 21   | 1  | -0.02 | -0.02 | 0.01  | -0.01 | -0.01 | 0.00  | -0.03 | -0.01 | 0.02  |
| 22   | 6  | 0.01  | 0.00  | -0.01 | 0.00  | 0.00  | 0.00  | -0.02 | 0.00  | 0.00  |
| 23   | 1  | -0.01 | 0.03  | -0.06 | 0.01  | 0.00  | 0.02  | 0.08  | 0.07  | 0.17  |
| 24   | 1  | -0.06 | -0.05 | 0.06  | 0.03  | 0.01  | -0.01 | 0.23  | -0.01 | -0.06 |
| 25   | 1  | -0.03 | 0.07  | 0.09  | 0.00  | -0.01 | -0.02 | -0.02 | -0.04 | -0.10 |
| 26   | 6  | 0.00  | 0.00  | 0.00  | 0.00  | 0.00  | 0.00  | 0.00  | 0.00  | 0.00  |
| 27   | 1  | -0.02 | -0.02 | 0.02  | 0.00  | -0.01 | 0.01  | 0.00  | 0.01  | 0.00  |
| 28   | 1  | -0.02 | -0.02 | -0.02 | 0.00  | 0.00  | -0.01 | 0.00  | 0.00  | 0.00  |
| 29   | 6  | 0.00  | 0.00  | 0.00  | 0.00  | 0.00  | 0.00  | 0.00  | 0.00  | -0.01 |
| 30   | 1  | -0.02 | -0.01 | 0.01  | -0.01 | -0.01 | 0.01  | -0.08 | -0.02 | 0.05  |



|    |   |       |       |       |       |       |       |       |       |       |
|----|---|-------|-------|-------|-------|-------|-------|-------|-------|-------|
| 31 | 1 | 0.01  | 0.00  | 0.03  | 0.00  | 0.00  | 0.02  | 0.02  | -0.02 | 0.09  |
| 32 | 6 | 0.00  | 0.00  | 0.00  | 0.00  | 0.00  | 0.00  | 0.00  | 0.00  | -0.01 |
| 33 | 1 | 0.00  | -0.01 | 0.00  | 0.00  | 0.00  | 0.00  | 0.01  | 0.01  | 0.00  |
| 34 | 6 | 0.00  | 0.00  | 0.00  | 0.00  | 0.00  | 0.00  | 0.00  | 0.00  | 0.00  |
| 35 | 1 | 0.00  | 0.00  | 0.00  | 0.00  | 0.00  | 0.00  | 0.01  | 0.01  | -0.01 |
| 36 | 6 | 0.00  | 0.00  | 0.00  | 0.00  | 0.00  | 0.00  | -0.04 | 0.01  | 0.00  |
| 37 | 1 | 0.07  | 0.01  | 0.02  | -0.01 | 0.00  | 0.00  | 0.33  | 0.25  | -0.19 |
| 38 | 1 | -0.02 | 0.00  | -0.03 | 0.00  | 0.00  | 0.00  | 0.34  | -0.29 | -0.20 |
| 39 | 1 | 0.00  | 0.07  | 0.03  | 0.00  | 0.00  | 0.00  | -0.06 | -0.05 | 0.37  |
| 40 | 6 | 0.00  | 0.00  | 0.00  | 0.00  | 0.00  | 0.00  | 0.00  | 0.00  | 0.00  |
| 41 | 1 | -0.01 | 0.00  | 0.00  | 0.00  | 0.00  | 0.00  | 0.00  | 0.01  | -0.01 |
| 42 | 6 | 0.01  | -0.01 | 0.00  | 0.00  | 0.00  | 0.00  | 0.00  | 0.00  | 0.00  |
| 43 | 1 | -0.06 | 0.09  | 0.01  | -0.02 | 0.03  | 0.00  | -0.01 | -0.01 | 0.02  |
| 44 | 1 | -0.05 | -0.01 | -0.07 | -0.01 | 0.00  | -0.02 | 0.03  | 0.00  | 0.00  |
| 45 | 1 | 0.03  | 0.02  | 0.06  | 0.01  | 0.01  | 0.02  | 0.01  | 0.03  | 0.00  |
| 46 | 6 | 0.00  | 0.00  | 0.00  | 0.00  | 0.00  | 0.00  | -0.01 | 0.01  | 0.00  |
| 47 | 1 | 0.00  | 0.00  | 0.00  | 0.01  | 0.02  | -0.02 | 0.02  | -0.01 | 0.01  |
| 48 | 6 | 0.00  | 0.00  | 0.00  | 0.00  | 0.00  | 0.00  | 0.00  | 0.00  | 0.00  |
| 49 | 1 | 0.00  | 0.03  | -0.02 | 0.00  | 0.02  | -0.01 | 0.01  | -0.02 | 0.02  |
| 50 | 1 | -0.03 | 0.02  | 0.02  | -0.02 | 0.01  | 0.01  | 0.03  | -0.01 | 0.00  |
| 51 | 6 | 0.00  | 0.00  | 0.00  | 0.00  | 0.00  | 0.00  | 0.00  | 0.00  | 0.00  |
| 52 | 1 | 0.00  | 0.00  | 0.00  | 0.00  | 0.00  | 0.00  | 0.00  | 0.00  | 0.00  |
| 53 | 6 | 0.00  | 0.00  | 0.00  | 0.00  | 0.00  | 0.00  | 0.00  | 0.00  | 0.00  |
| 54 | 1 | 0.00  | 0.00  | 0.00  | 0.00  | 0.00  | 0.00  | 0.00  | 0.00  | 0.00  |
| 55 | 6 | 0.00  | 0.00  | 0.00  | 0.00  | 0.00  | 0.00  | 0.00  | 0.00  | 0.00  |
| 56 | 1 | 0.00  | 0.00  | 0.00  | 0.00  | 0.00  | 0.00  | 0.00  | 0.00  | 0.00  |
| 57 | 6 | 0.00  | 0.00  | 0.00  | 0.00  | 0.00  | 0.00  | 0.00  | 0.00  | 0.00  |
| 58 | 1 | 0.00  | 0.00  | 0.00  | 0.00  | 0.00  | 0.00  | 0.00  | 0.00  | 0.00  |
| 59 | 8 | 0.00  | 0.00  | 0.00  | 0.00  | 0.00  | 0.00  | 0.00  | 0.00  | 0.00  |
| 60 | 8 | 0.00  | 0.00  | 0.00  | 0.00  | 0.00  | 0.00  | 0.00  | 0.00  | 0.00  |
| 61 | 8 | 0.00  | 0.00  | 0.00  | 0.00  | 0.00  | 0.00  | 0.00  | 0.00  | 0.00  |
| 62 | 6 | 0.00  | 0.00  | 0.00  | 0.00  | 0.00  | 0.00  | 0.00  | 0.00  | 0.00  |
| 63 | 6 | 0.01  | 0.01  | 0.01  | -0.02 | 0.01  | 0.01  | 0.00  | 0.00  | 0.00  |
| 64 | 6 | 0.00  | 0.00  | -0.01 | 0.02  | 0.02  | 0.00  | 0.00  | 0.00  | 0.00  |
| 65 | 8 | 0.00  | 0.00  | 0.00  | 0.00  | 0.00  | 0.00  | 0.00  | 0.00  | 0.00  |
| 66 | 1 | 0.00  | 0.01  | -0.01 | 0.00  | -0.02 | -0.01 | 0.00  | 0.00  | 0.00  |
| 67 | 6 | 0.00  | -0.01 | -0.02 | 0.00  | -0.01 | 0.01  | 0.00  | 0.00  | 0.00  |
| 68 | 1 | 0.19  | 0.15  | 0.09  | -0.09 | 0.07  | -0.08 | 0.00  | 0.00  | 0.00  |
| 69 | 1 | -0.09 | -0.05 | 0.27  | 0.03  | -0.06 | -0.07 | 0.00  | 0.00  | 0.00  |
| 70 | 1 | -0.18 | -0.02 | 0.00  | -0.07 | 0.03  | 0.06  | 0.00  | 0.00  | 0.00  |
| 71 | 6 | 0.04  | 0.00  | 0.01  | 0.00  | 0.05  | -0.02 | 0.00  | 0.00  | 0.00  |
| 72 | 1 | -0.26 | 0.37  | 0.13  | 0.20  | -0.33 | 0.50  | 0.00  | -0.01 | -0.02 |
| 73 | 1 | 0.11  | -0.32 | -0.11 | -0.33 | -0.53 | 0.02  | 0.00  | 0.02  | 0.00  |
| 74 | 1 | -0.49 | -0.16 | -0.30 | 0.19  | 0.10  | -0.33 | 0.01  | 0.00  | 0.02  |

|                |           |           |           |
|----------------|-----------|-----------|-----------|
|                | 172       | 173       | 174       |
|                | A         | A         | A         |
| Frequencies -- | 1507.2569 | 1514.0912 | 1522.5028 |
| Red. masses -- | 1.0543    | 1.0607    | 1.0929    |
| Frc consts --  | 1.4111    | 1.4327    | 1.4927    |
| IR Inten --    | 2.2136    | 12.9483   | 5.4574    |
| Raman Activ -- | 5.2799    | 27.3727   | 13.4777   |
| Depolar (P) -- | 0.7500    | 0.7216    | 0.7440    |

| Depolar (U) -- |   |       |       | 0.8571 |       | 0.8383 |       |   | 0.8532 |       |       |
|----------------|---|-------|-------|--------|-------|--------|-------|---|--------|-------|-------|
| Atom           |   | AN    | X     | Y      | Z     | X      | Y     | Z | X      | Y     | Z     |
| 1              | 6 | -0.01 | 0.00  | 0.01   | -0.01 | -0.02  | -0.01 |   | 0.01   | 0.00  | 0.00  |
| 2              | 6 | 0.00  | 0.00  | 0.00   | 0.00  | 0.00   | 0.00  |   | 0.00   | 0.00  | 0.00  |
| 3              | 6 | 0.00  | 0.00  | 0.00   | 0.00  | 0.00   | 0.00  |   | 0.00   | 0.00  | 0.00  |
| 4              | 6 | 0.01  | -0.02 | -0.01  | -0.01 | -0.01  | 0.00  |   | 0.00   | 0.00  | 0.00  |
| 5              | 6 | -0.01 | 0.01  | 0.01   | 0.00  | 0.00   | 0.00  |   | 0.00   | 0.00  | 0.00  |
| 6              | 6 | 0.00  | 0.00  | 0.00   | 0.00  | 0.00   | 0.00  |   | 0.00   | 0.00  | 0.00  |
| 7              | 8 | 0.00  | 0.00  | 0.00   | 0.00  | 0.00   | 0.00  |   | 0.00   | 0.00  | 0.00  |
| 8              | 6 | 0.00  | 0.01  | 0.00   | 0.01  | -0.01  | -0.01 |   | 0.00   | -0.01 | -0.02 |
| 9              | 6 | 0.00  | 0.00  | 0.00   | 0.00  | 0.00   | 0.00  |   | -0.01  | 0.00  | 0.00  |
| 10             | 1 | -0.03 | -0.03 | 0.02   | -0.01 | 0.03   | 0.01  |   | 0.02   | 0.00  | -0.01 |
| 11             | 8 | 0.00  | 0.00  | 0.00   | 0.00  | 0.00   | 0.00  |   | 0.00   | 0.00  | -0.01 |
| 12             | 6 | 0.00  | 0.00  | 0.00   | 0.00  | 0.00   | 0.00  |   | 0.00   | 0.00  | 0.00  |
| 13             | 1 | 0.02  | 0.02  | -0.02  | 0.00  | 0.01   | -0.01 |   | 0.01   | -0.01 | 0.01  |
| 14             | 6 | 0.00  | 0.00  | 0.00   | 0.00  | 0.00   | 0.00  |   | 0.00   | 0.00  | 0.00  |
| 15             | 8 | 0.00  | 0.00  | 0.00   | 0.00  | 0.00   | 0.00  |   | 0.00   | 0.00  | 0.00  |
| 16             | 6 | 0.00  | 0.02  | 0.00   | 0.01  | -0.02  | -0.01 |   | 0.01   | -0.01 | 0.00  |
| 17             | 1 | 0.02  | -0.21 | -0.05  | -0.07 | 0.28   | -0.01 |   | -0.05  | 0.20  | -0.02 |
| 18             | 1 | -0.13 | -0.02 | 0.03   | 0.13  | -0.08  | 0.04  |   | 0.09   | -0.02 | 0.01  |
| 19             | 1 | 0.17  | 0.00  | -0.05  | -0.23 | 0.05   | 0.20  |   | -0.16  | 0.02  | 0.10  |
| 20             | 6 | 0.00  | 0.00  | 0.00   | 0.01  | 0.02   | 0.00  |   | -0.01  | -0.01 | 0.01  |
| 21             | 1 | 0.00  | 0.00  | 0.00   | -0.04 | -0.09  | 0.01  |   | 0.09   | 0.08  | -0.05 |
| 22             | 6 | -0.02 | 0.01  | 0.01   | -0.02 | -0.03  | -0.02 |   | 0.00   | -0.01 | 0.00  |
| 23             | 1 | 0.02  | -0.10 | 0.23   | 0.24  | 0.45   | 0.14  |   | 0.03   | 0.08  | -0.01 |
| 24             | 1 | 0.24  | 0.13  | -0.17  | 0.35  | -0.18  | 0.04  |   | 0.02   | -0.04 | 0.02  |
| 25             | 1 | 0.10  | -0.21 | -0.26  | -0.30 | 0.22   | 0.05  |   | -0.05  | 0.05  | 0.04  |
| 26             | 6 | 0.00  | 0.00  | 0.00   | 0.00  | 0.00   | 0.00  |   | 0.00   | 0.00  | 0.00  |
| 27             | 1 | 0.00  | 0.00  | 0.00   | 0.00  | 0.00   | 0.00  |   | 0.00   | 0.00  | 0.00  |
| 28             | 1 | 0.00  | 0.00  | 0.00   | 0.00  | 0.00   | 0.00  |   | 0.00   | 0.00  | 0.00  |
| 29             | 6 | 0.00  | 0.00  | -0.01  | -0.01 | -0.01  | 0.01  |   | 0.03   | 0.05  | -0.06 |
| 30             | 1 | -0.08 | -0.04 | 0.04   | 0.12  | 0.07   | -0.06 |   | -0.52  | -0.35 | 0.26  |
| 31             | 1 | 0.03  | -0.03 | 0.10   | -0.04 | 0.03   | -0.13 |   | 0.20   | -0.20 | 0.58  |
| 32             | 6 | 0.00  | 0.00  | 0.00   | 0.00  | 0.00   | 0.00  |   | 0.00   | 0.00  | 0.00  |
| 33             | 1 | 0.01  | 0.01  | 0.00   | 0.00  | 0.00   | 0.01  |   | 0.00   | 0.01  | 0.01  |
| 34             | 6 | 0.00  | 0.00  | 0.00   | 0.01  | 0.01   | 0.00  |   | 0.00   | 0.00  | 0.00  |
| 35             | 1 | 0.01  | 0.01  | -0.01  | -0.01 | -0.01  | 0.01  |   | 0.00   | 0.00  | 0.00  |
| 36             | 6 | 0.01  | -0.04 | -0.01  | -0.01 | -0.02  | -0.01 |   | 0.00   | 0.00  | 0.00  |
| 37             | 1 | 0.15  | -0.12 | 0.25   | 0.24  | 0.04   | 0.07  |   | 0.01   | 0.01  | -0.01 |
| 38             | 1 | -0.43 | 0.20  | -0.01  | -0.09 | -0.01  | -0.09 |   | 0.02   | -0.01 | -0.01 |
| 39             | 1 | 0.06  | 0.49  | -0.12  | 0.00  | 0.26   | 0.11  |   | 0.00   | 0.00  | 0.02  |
| 40             | 6 | 0.00  | 0.00  | 0.00   | 0.00  | 0.00   | 0.00  |   | 0.00   | 0.00  | 0.00  |
| 41             | 1 | -0.01 | 0.00  | 0.00   | -0.01 | 0.00   | 0.00  |   | 0.00   | 0.00  | 0.00  |
| 42             | 6 | 0.00  | 0.00  | 0.00   | 0.00  | 0.00   | 0.00  |   | 0.00   | 0.00  | 0.00  |
| 43             | 1 | 0.00  | 0.01  | 0.00   | 0.00  | 0.01   | 0.00  |   | 0.00   | -0.01 | 0.00  |
| 44             | 1 | -0.01 | 0.00  | 0.00   | -0.01 | 0.00   | 0.00  |   | 0.01   | 0.00  | 0.00  |
| 45             | 1 | 0.00  | 0.00  | 0.01   | 0.00  | -0.01  | 0.00  |   | 0.00   | 0.00  | 0.00  |
| 46             | 6 | 0.00  | -0.01 | 0.00   | 0.00  | 0.00   | 0.00  |   | 0.00   | 0.00  | 0.00  |
| 47             | 1 | -0.03 | 0.01  | -0.01  | -0.01 | 0.01   | 0.00  |   | 0.00   | 0.00  | 0.00  |
| 48             | 6 | 0.00  | 0.00  | 0.00   | 0.00  | 0.00   | 0.00  |   | 0.00   | 0.00  | 0.00  |
| 49             | 1 | -0.01 | 0.00  | -0.01  | 0.00  | 0.00   | 0.00  |   | 0.00   | 0.00  | 0.00  |
| 50             | 1 | -0.01 | 0.00  | 0.00   | 0.00  | 0.00   | 0.00  |   | 0.00   | 0.00  | 0.00  |

|    |   |       |       |       |      |      |      |      |      |       |
|----|---|-------|-------|-------|------|------|------|------|------|-------|
| 51 | 6 | 0.00  | 0.00  | 0.00  | 0.00 | 0.00 | 0.00 | 0.00 | 0.00 | 0.00  |
| 52 | 1 | 0.00  | 0.00  | 0.00  | 0.00 | 0.00 | 0.00 | 0.00 | 0.00 | 0.00  |
| 53 | 6 | 0.00  | 0.00  | 0.00  | 0.00 | 0.00 | 0.00 | 0.00 | 0.00 | 0.00  |
| 54 | 1 | 0.00  | 0.00  | 0.00  | 0.00 | 0.00 | 0.00 | 0.00 | 0.00 | 0.00  |
| 55 | 6 | 0.00  | 0.00  | 0.00  | 0.00 | 0.00 | 0.00 | 0.00 | 0.00 | 0.00  |
| 56 | 1 | 0.00  | 0.00  | 0.00  | 0.00 | 0.00 | 0.00 | 0.00 | 0.00 | 0.00  |
| 57 | 6 | 0.00  | 0.00  | 0.00  | 0.00 | 0.00 | 0.00 | 0.00 | 0.00 | 0.00  |
| 58 | 1 | 0.00  | 0.00  | 0.00  | 0.00 | 0.00 | 0.00 | 0.00 | 0.00 | 0.00  |
| 59 | 8 | 0.00  | 0.00  | 0.00  | 0.00 | 0.00 | 0.00 | 0.00 | 0.00 | 0.00  |
| 60 | 8 | 0.00  | 0.00  | 0.00  | 0.00 | 0.00 | 0.00 | 0.00 | 0.00 | 0.00  |
| 61 | 8 | 0.00  | 0.00  | 0.00  | 0.00 | 0.00 | 0.00 | 0.00 | 0.00 | 0.00  |
| 62 | 6 | 0.00  | 0.00  | 0.00  | 0.00 | 0.00 | 0.00 | 0.00 | 0.00 | 0.00  |
| 63 | 6 | 0.00  | 0.00  | 0.00  | 0.00 | 0.00 | 0.00 | 0.00 | 0.00 | 0.00  |
| 64 | 6 | 0.00  | 0.00  | 0.00  | 0.00 | 0.00 | 0.00 | 0.00 | 0.00 | 0.00  |
| 65 | 8 | 0.00  | 0.00  | 0.00  | 0.00 | 0.00 | 0.00 | 0.00 | 0.00 | 0.00  |
| 66 | 1 | 0.00  | 0.00  | 0.00  | 0.00 | 0.00 | 0.00 | 0.00 | 0.00 | 0.00  |
| 67 | 6 | 0.00  | 0.00  | 0.00  | 0.00 | 0.00 | 0.00 | 0.00 | 0.00 | 0.00  |
| 68 | 1 | 0.00  | 0.00  | 0.00  | 0.00 | 0.00 | 0.00 | 0.00 | 0.00 | 0.00  |
| 69 | 1 | 0.00  | 0.00  | 0.00  | 0.00 | 0.00 | 0.00 | 0.00 | 0.00 | 0.00  |
| 70 | 1 | 0.00  | 0.00  | 0.00  | 0.00 | 0.00 | 0.00 | 0.00 | 0.00 | 0.00  |
| 71 | 6 | 0.00  | 0.00  | 0.00  | 0.00 | 0.00 | 0.00 | 0.00 | 0.00 | 0.00  |
| 72 | 1 | -0.01 | 0.02  | -0.02 | 0.00 | 0.00 | 0.00 | 0.00 | 0.00 | -0.01 |
| 73 | 1 | 0.01  | 0.02  | 0.00  | 0.00 | 0.00 | 0.00 | 0.00 | 0.01 | 0.00  |
| 74 | 1 | -0.01 | -0.01 | 0.01  | 0.00 | 0.00 | 0.00 | 0.00 | 0.00 | 0.01  |

175

176

177

A

A

A

|                |           |           |           |
|----------------|-----------|-----------|-----------|
| Frequencies -- | 1530.1712 | 1625.9499 | 1648.5716 |
| Red. masses -- | 3.9431    | 5.6809    | 6.9531    |
| Frc consts --  | 5.4396    | 8.8487    | 11.1338   |
| IR Inten --    | 23.5845   | 1.4847    | 54.0221   |
| Raman Activ -- | 101.1704  | 24.0532   | 158.0979  |
| Depolar (P) -- | 0.1357    | 0.1538    | 0.1882    |
| Depolar (U) -- | 0.2390    | 0.2665    | 0.3168    |

| Atom | AN | X    | Y     | Z    | X     | Y     | Z    | X     | Y     | Z     |
|------|----|------|-------|------|-------|-------|------|-------|-------|-------|
| 1    | 6  | 0.00 | 0.00  | 0.00 | 0.00  | 0.00  | 0.00 | -0.01 | -0.01 | 0.00  |
| 2    | 6  | 0.00 | 0.00  | 0.00 | 0.00  | 0.00  | 0.00 | 0.02  | 0.03  | 0.01  |
| 3    | 6  | 0.00 | 0.00  | 0.00 | 0.00  | 0.00  | 0.00 | 0.00  | 0.00  | 0.00  |
| 4    | 6  | 0.00 | 0.00  | 0.00 | 0.00  | 0.00  | 0.00 | 0.00  | 0.00  | 0.00  |
| 5    | 6  | 0.01 | 0.00  | 0.00 | 0.01  | 0.00  | 0.00 | 0.00  | 0.00  | 0.00  |
| 6    | 6  | 0.00 | 0.01  | 0.01 | -0.01 | 0.00  | 0.00 | 0.00  | 0.00  | 0.00  |
| 7    | 8  | 0.00 | 0.00  | 0.00 | 0.00  | 0.00  | 0.00 | 0.02  | 0.02  | -0.02 |
| 8    | 6  | 0.00 | 0.00  | 0.00 | 0.00  | 0.00  | 0.00 | -0.03 | -0.08 | -0.03 |
| 9    | 6  | 0.00 | 0.00  | 0.00 | 0.00  | 0.00  | 0.00 | -0.01 | -0.01 | 0.00  |
| 10   | 1  | 0.00 | 0.00  | 0.00 | 0.00  | 0.00  | 0.00 | 0.01  | 0.00  | -0.01 |
| 11   | 8  | 0.00 | 0.00  | 0.00 | 0.00  | 0.00  | 0.00 | 0.00  | 0.00  | 0.00  |
| 12   | 6  | 0.00 | 0.00  | 0.00 | 0.00  | 0.00  | 0.00 | 0.00  | 0.00  | 0.00  |
| 13   | 1  | 0.00 | 0.00  | 0.00 | 0.00  | 0.00  | 0.00 | -0.02 | 0.00  | 0.00  |
| 14   | 6  | 0.11 | -0.04 | 0.12 | 0.23  | -0.25 | 0.28 | 0.00  | 0.00  | 0.00  |
| 15   | 8  | 0.04 | -0.04 | 0.04 | 0.00  | -0.02 | 0.00 | 0.00  | 0.00  | 0.00  |
| 16   | 6  | 0.00 | 0.00  | 0.00 | 0.00  | 0.00  | 0.00 | -0.01 | 0.00  | -0.01 |
| 17   | 1  | 0.00 | 0.00  | 0.00 | 0.00  | 0.00  | 0.00 | 0.02  | 0.02  | 0.05  |
| 18   | 1  | 0.00 | 0.00  | 0.00 | 0.00  | 0.00  | 0.00 | 0.09  | -0.04 | 0.02  |

[illegible]

|                |    |           |       |      |       |           |       |       |       |           |
|----------------|----|-----------|-------|------|-------|-----------|-------|-------|-------|-----------|
| 71             | 6  | 0.00      | 0.00  | 0.00 | 0.00  | 0.00      | 0.00  | 0.00  | 0.00  | 0.00      |
| 72             | 1  | 0.00      | 0.00  | 0.00 | 0.00  | 0.00      | 0.00  | 0.00  | 0.00  | 0.00      |
| 73             | 1  | 0.00      | 0.00  | 0.00 | 0.00  | 0.00      | 0.00  | 0.00  | 0.00  | 0.00      |
| 74             | 1  | 0.00      | 0.00  | 0.00 | 0.00  | 0.00      | 0.00  | 0.00  | 0.00  | 0.00      |
| 178            |    |           |       | 179  |       |           |       | 180   |       |           |
| A              |    |           |       | A    |       |           |       | A     |       |           |
| Frequencies -- |    | 1692.7491 |       |      |       | 1719.1678 |       |       |       | 1753.6214 |
| Red. masses -- |    | 6.6007    |       |      |       | 11.6727   |       |       |       | 11.3940   |
| Frc consts --  |    | 11.1436   |       |      |       | 20.3263   |       |       |       | 20.6443   |
| IR Inten --    |    | 159.0973  |       |      |       | 374.9763  |       |       |       | 326.2675  |
| Raman Activ -- |    | 264.4437  |       |      |       | 96.2937   |       |       |       | 24.7567   |
| Depolar (P) -- |    | 0.2061    |       |      |       | 0.3500    |       |       |       | 0.1984    |
| Depolar (U) -- |    | 0.3418    |       |      |       | 0.5185    |       |       |       | 0.3311    |
| Atom           | AN | X         | Y     | Z    | X     | Y         | Z     | X     | Y     | Z         |
| 1              | 6  | 0.00      | 0.00  | 0.00 | -0.03 | -0.04     | 0.01  | 0.00  | 0.00  | 0.00      |
| 2              | 6  | 0.00      | 0.00  | 0.00 | 0.32  | 0.70      | 0.01  | 0.00  | 0.01  | 0.00      |
| 3              | 6  | 0.00      | 0.00  | 0.00 | 0.02  | 0.02      | 0.01  | 0.00  | 0.00  | 0.00      |
| 4              | 6  | 0.00      | 0.00  | 0.00 | -0.01 | 0.00      | 0.00  | 0.00  | 0.00  | 0.00      |
| 5              | 6  | 0.00      | 0.00  | 0.00 | 0.00  | 0.00      | 0.00  | 0.00  | 0.00  | 0.00      |
| 6              | 6  | 0.00      | 0.00  | 0.00 | 0.00  | 0.00      | 0.00  | 0.00  | 0.00  | 0.00      |
| 7              | 8  | 0.00      | 0.00  | 0.00 | -0.22 | -0.47     | 0.01  | 0.00  | -0.01 | 0.00      |
| 8              | 6  | 0.00      | 0.00  | 0.00 | 0.00  | 0.01      | 0.01  | 0.00  | 0.00  | 0.00      |
| 9              | 6  | 0.00      | 0.00  | 0.00 | 0.00  | 0.01      | 0.01  | -0.01 | 0.00  | 0.01      |
| 10             | 1  | -0.01     | 0.00  | 0.00 | 0.00  | 0.00      | 0.00  | 0.06  | -0.02 | -0.03     |
| 11             | 8  | 0.00      | 0.00  | 0.00 | 0.00  | 0.00      | 0.00  | 0.00  | 0.00  | 0.00      |
| 12             | 6  | 0.00      | -0.01 | 0.00 | 0.00  | 0.00      | 0.00  | 0.00  | 0.03  | -0.04     |
| 13             | 1  | 0.00      | 0.00  | 0.00 | 0.00  | 0.00      | -0.01 | 0.04  | -0.08 | 0.07      |
| 14             | 6  | 0.00      | 0.00  | 0.00 | 0.00  | 0.00      | 0.00  | 0.00  | 0.00  | 0.00      |
| 15             | 8  | 0.00      | 0.00  | 0.00 | 0.00  | 0.00      | 0.00  | 0.00  | 0.00  | 0.00      |
| 16             | 6  | 0.00      | 0.00  | 0.00 | 0.00  | 0.00      | 0.00  | 0.00  | 0.00  | 0.00      |
| 17             | 1  | 0.00      | 0.00  | 0.00 | 0.00  | 0.00      | 0.00  | 0.00  | 0.00  | 0.00      |
| 18             | 1  | 0.00      | 0.00  | 0.00 | 0.01  | 0.00      | 0.00  | 0.00  | 0.00  | 0.00      |
| 19             | 1  | 0.00      | 0.00  | 0.00 | 0.00  | 0.00      | 0.00  | 0.00  | 0.00  | 0.00      |
| 20             | 6  | 0.00      | 0.00  | 0.00 | 0.00  | -0.03     | -0.02 | 0.00  | 0.00  | 0.00      |
| 21             | 1  | 0.00      | 0.01  | 0.00 | 0.02  | 0.04      | -0.01 | -0.02 | 0.01  | 0.02      |
| 22             | 6  | 0.00      | 0.00  | 0.00 | -0.01 | 0.01      | -0.02 | 0.00  | 0.00  | 0.00      |
| 23             | 1  | 0.00      | 0.00  | 0.00 | 0.01  | 0.04      | 0.04  | 0.00  | 0.00  | 0.00      |
| 24             | 1  | 0.00      | 0.00  | 0.00 | 0.05  | -0.09     | 0.06  | 0.00  | 0.00  | 0.00      |
| 25             | 1  | 0.00      | 0.00  | 0.00 | 0.01  | 0.04      | 0.06  | 0.00  | 0.00  | 0.00      |
| 26             |    |           |       |      |       |           |       |       |       |           |



[illegible]

|    |   |      |      |      |       |       |       |       |       |       |
|----|---|------|------|------|-------|-------|-------|-------|-------|-------|
| 59 | 8 | 0.00 | 0.00 | 0.00 | 0.00  | 0.00  | 0.00  | 0.00  | 0.00  | 0.00  |
| 60 | 8 | 0.00 | 0.00 | 0.00 | 0.00  | 0.00  | 0.00  | 0.00  | 0.00  | 0.00  |
| 61 | 8 | 0.00 | 0.00 | 0.00 | 0.00  | 0.00  | 0.00  | 0.00  | 0.00  | 0.00  |
| 62 | 6 | 0.00 | 0.00 | 0.00 | 0.00  | 0.00  | 0.00  | 0.00  | 0.00  | 0.00  |
| 63 | 6 | 0.00 | 0.00 | 0.00 | 0.00  | 0.00  | 0.00  | 0.00  | 0.00  | 0.00  |
| 64 | 6 | 0.00 | 0.00 | 0.00 | 0.00  | 0.00  | 0.00  | 0.00  | 0.00  | 0.00  |
| 65 | 8 | 0.00 | 0.00 | 0.00 | 0.00  | 0.00  | 0.00  | 0.00  | 0.00  | 0.00  |
| 66 | 1 | 0.00 | 0.00 | 0.00 | -0.01 | 0.00  | 0.01  | -0.01 | 0.00  | 0.01  |
| 67 | 6 | 0.00 | 0.00 | 0.00 | -0.03 | -0.05 | 0.00  | 0.00  | 0.00  | 0.00  |
| 68 | 1 | 0.00 | 0.00 | 0.00 | -0.21 | 0.06  | 0.27  | 0.00  | 0.00  | -0.01 |
| 69 | 1 | 0.00 | 0.00 | 0.00 | 0.63  | 0.01  | 0.21  | 0.03  | 0.00  | 0.01  |
| 70 | 1 | 0.00 | 0.00 | 0.00 | -0.08 | 0.48  | -0.45 | 0.00  | 0.02  | -0.02 |
| 71 | 6 | 0.00 | 0.00 | 0.00 | 0.00  | 0.00  | 0.00  | 0.00  | 0.00  | -0.06 |
| 72 | 1 | 0.00 | 0.00 | 0.00 | 0.01  | 0.01  | 0.00  | -0.25 | -0.18 | -0.05 |
| 73 | 1 | 0.00 | 0.00 | 0.00 | -0.01 | 0.01  | -0.02 | 0.37  | -0.18 | 0.76  |
| 74 | 1 | 0.00 | 0.00 | 0.00 | 0.01  | -0.02 | 0.00  | -0.12 | 0.36  | -0.01 |

184

185

186

A

A

A

|                |           |           |           |
|----------------|-----------|-----------|-----------|
| Frequencies -- | 3032.6993 | 3037.1375 | 3037.6919 |
| Red. masses -- | 1.0627    | 1.0595    | 1.0605    |
| Frc consts --  | 5.7587    | 5.7581    | 5.7654    |
| IR Inten --    | 53.4612   | 41.1544   | 31.8756   |
| Raman Activ -- | 124.5063  | 121.0025  | 223.2480  |
| Depolar (P) -- | 0.1018    | 0.1476    | 0.0745    |
| Depolar (U) -- | 0.1848    | 0.2573    | 0.1386    |

| Atom | AN | X     | Y     | Z     | X     | Y    | Z     | X     | Y     | Z     |
|------|----|-------|-------|-------|-------|------|-------|-------|-------|-------|
| 1    | 6  | 0.00  | 0.00  | 0.00  | 0.00  | 0.00 | 0.00  | 0.00  | 0.00  | 0.00  |
| 2    | 6  | 0.00  | 0.00  | 0.00  | 0.00  | 0.00 | 0.00  | 0.00  | 0.00  | 0.00  |
| 3    | 6  | 0.00  | 0.00  | 0.00  | 0.00  | 0.00 | 0.00  | 0.00  | 0.00  | 0.00  |
| 4    | 6  | 0.00  | 0.00  | 0.00  | 0.00  | 0.00 | 0.00  | 0.00  | 0.00  | 0.00  |
| 5    | 6  | 0.00  | 0.00  | 0.00  | 0.00  | 0.00 | 0.00  | 0.00  | 0.00  | 0.00  |
| 6    | 6  | 0.00  | 0.00  | 0.00  | 0.00  | 0.00 | 0.00  | 0.00  | 0.00  | 0.00  |
| 7    | 8  | 0.00  | 0.00  | 0.00  | 0.00  | 0.00 | 0.00  | 0.00  | 0.00  | 0.00  |
| 8    | 6  | 0.00  | 0.00  | 0.00  | 0.00  | 0.00 | 0.00  | 0.00  | 0.00  | 0.00  |
| 9    | 6  | 0.00  | 0.00  | 0.00  | 0.00  | 0.00 | 0.00  | 0.00  | 0.00  | 0.00  |
| 10   | 1  | 0.01  | 0.00  | 0.03  | 0.00  | 0.00 | 0.00  | 0.00  | 0.00  | 0.00  |
| 11   | 8  | 0.00  | 0.00  | 0.00  | 0.00  | 0.00 | 0.00  | 0.00  | 0.00  | 0.00  |
| 12   | 6  | 0.00  | 0.00  | 0.00  | 0.00  | 0.00 | 0.00  | 0.00  | 0.00  | 0.00  |
| 13   | 1  | 0.00  | 0.00  | 0.00  | 0.00  | 0.00 | 0.00  | 0.00  | 0.00  | 0.00  |
| 14   | 6  | 0.00  | 0.00  | 0.00  | 0.00  | 0.00 | 0.00  | 0.00  | 0.00  | 0.00  |
| 15   | 8  | 0.00  | 0.00  | 0.00  | 0.00  | 0.00 | 0.00  | 0.00  | 0.00  | 0.00  |
| 16   | 6  | -0.01 | 0.00  | 0.00  | 0.00  | 0.00 | 0.00  | 0.00  | 0.00  | 0.00  |
| 17   | 1  | 0.09  | 0.02  | -0.06 | -0.01 | 0.00 | 0.01  | -0.01 | 0.00  | 0.01  |
| 18   | 1  | 0.00  | 0.05  | 0.07  | 0.00  | 0.00 | -0.01 | 0.00  | -0.01 | -0.01 |
| 19   | 1  | 0.00  | -0.05 | 0.02  | 0.00  | 0.00 | 0.00  | 0.00  | 0.01  | 0.00  |
| 20   | 6  | 0.00  | 0.00  | 0.00  | 0.00  | 0.00 | 0.00  | 0.00  | 0.00  | 0.00  |
| 21   | 1  | 0.05  | -0.01 | 0.05  | 0.00  | 0.00 | 0.00  | 0.00  | 0.00  | 0.00  |
| 22   | 6  | 0.00  | 0.00  | 0.00  | 0.00  | 0.00 | 0.00  | 0.00  | 0.00  | 0.00  |
| 23   | 1  | -0.01 | 0.00  | 0.00  | 0.00  | 0.00 | 0.00  | 0.00  | 0.00  | 0.00  |
| 24   | 1  | 0.00  | 0.00  | 0.00  | 0.00  | 0.00 | 0.00  | 0.00  | 0.00  | 0.00  |
| 25   | 1  | 0.00  | 0.00  | 0.00  | 0.00  | 0.00 | 0.00  | 0.00  | 0.00  | 0.00  |
| 26   | 6  | 0.00  | 0.00  | 0.00  | 0.05  | 0.04 | -0.01 | 0.01  | 0.01  | 0.00  |



|    |   |       |       |       |       |       |       |       |       |       |
|----|---|-------|-------|-------|-------|-------|-------|-------|-------|-------|
| 27 | 1 | 0.00  | 0.00  | -0.01 | -0.27 | -0.23 | -0.51 | -0.05 | -0.04 | -0.09 |
| 28 | 1 | 0.00  | 0.00  | 0.01  | -0.32 | -0.28 | 0.61  | -0.06 | -0.05 | 0.11  |
| 29 | 6 | -0.02 | 0.03  | -0.06 | 0.00  | 0.00  | 0.00  | 0.00  | 0.00  | 0.00  |
| 30 | 1 | 0.53  | -0.17 | 0.71  | 0.00  | 0.00  | 0.00  | 0.00  | 0.00  | -0.01 |
| 31 | 1 | -0.35 | -0.15 | 0.03  | 0.00  | 0.00  | 0.00  | 0.00  | 0.00  | 0.00  |
| 32 | 6 | 0.00  | 0.00  | 0.00  | 0.00  | 0.00  | 0.00  | 0.00  | 0.00  | 0.00  |
| 33 | 1 | 0.01  | 0.00  | -0.01 | 0.00  | 0.00  | 0.00  | 0.00  | 0.00  | 0.00  |
| 34 | 6 | 0.00  | 0.00  | 0.00  | 0.00  | 0.00  | 0.00  | 0.00  | 0.00  | 0.00  |
| 35 | 1 | 0.00  | 0.00  | 0.00  | 0.00  | 0.00  | 0.00  | 0.00  | 0.00  | 0.00  |
| 36 | 6 | 0.00  | 0.00  | 0.00  | 0.00  | 0.00  | 0.00  | 0.00  | 0.00  | 0.00  |
| 37 | 1 | 0.00  | 0.00  | 0.00  | 0.00  | 0.00  | 0.00  | 0.00  | 0.00  | 0.00  |
| 38 | 1 | 0.00  | 0.00  | 0.00  | 0.00  | 0.00  | 0.00  | 0.00  | 0.00  | 0.00  |
| 39 | 1 | 0.00  | 0.00  | 0.00  | 0.00  | 0.00  | 0.00  | 0.00  | 0.00  | 0.00  |
| 40 | 6 | 0.00  | 0.00  | 0.00  | 0.00  | 0.00  | 0.00  | 0.00  | 0.00  | 0.00  |
| 41 | 1 | 0.00  | 0.00  | 0.00  | 0.00  | 0.02  | 0.02  | 0.00  | 0.00  | 0.00  |
| 42 | 6 | 0.00  | 0.00  | 0.00  | 0.00  | 0.00  | -0.01 | 0.00  | 0.00  | -0.01 |
| 43 | 1 | 0.00  | 0.00  | 0.00  | 0.06  | 0.04  | 0.06  | 0.06  | 0.04  | 0.06  |
| 44 | 1 | 0.00  | 0.00  | 0.00  | 0.00  | -0.04 | 0.00  | 0.00  | -0.08 | 0.00  |
| 45 | 1 | 0.00  | 0.00  | 0.00  | -0.04 | 0.01  | 0.01  | -0.05 | 0.01  | 0.01  |
| 46 | 6 | 0.00  | 0.00  | 0.00  | 0.00  | 0.00  | 0.00  | 0.00  | 0.00  | 0.00  |
| 47 | 1 | 0.00  | 0.00  | 0.00  | 0.00  | 0.01  | 0.01  | -0.02 | -0.03 | -0.02 |
| 48 | 6 | 0.00  | 0.00  | 0.00  | 0.00  | 0.01  | 0.00  | 0.02  | -0.06 | 0.02  |
| 49 | 1 | 0.00  | 0.00  | 0.00  | 0.07  | -0.02 | -0.06 | -0.38 | 0.11  | 0.33  |
| 50 | 1 | 0.00  | 0.01  | 0.00  | -0.02 | -0.12 | 0.11  | 0.09  | 0.61  | -0.55 |
| 51 | 6 | 0.00  | 0.00  | 0.00  | 0.00  | 0.00  | 0.00  | 0.00  | 0.00  | 0.00  |
| 52 | 1 | 0.00  | 0.00  | 0.00  | 0.02  | 0.04  | -0.05 | -0.03 | -0.05 | 0.05  |
| 53 | 6 | 0.00  | 0.00  | 0.00  | 0.00  | 0.00  | 0.00  | 0.00  | 0.00  | 0.00  |
| 54 | 1 | 0.00  | 0.00  | 0.00  | 0.00  | 0.00  | 0.00  | 0.00  | 0.00  | 0.00  |
| 55 | 6 | 0.00  | 0.00  | 0.00  | 0.00  | 0.00  | 0.00  | 0.00  | 0.00  | 0.00  |
| 56 | 1 | 0.00  | 0.00  | 0.00  | 0.00  | 0.00  | 0.00  | 0.00  | 0.00  | 0.00  |
| 57 | 6 | 0.00  | 0.00  | 0.00  | 0.00  | 0.00  | 0.00  | 0.00  | 0.00  | 0.00  |
| 58 | 1 | 0.00  | 0.00  | 0.00  | 0.00  | 0.00  | 0.00  | 0.00  | -0.01 | 0.00  |
| 59 | 8 | 0.00  | 0.00  | 0.00  | 0.00  | 0.00  | 0.00  | 0.00  | 0.00  | 0.00  |
| 60 | 8 | 0.00  | 0.00  | 0.00  | 0.00  | 0.00  | 0.00  | 0.00  | 0.00  | 0.00  |
| 61 | 8 | 0.00  | 0.00  | 0.00  | 0.00  | 0.00  | 0.00  | 0.00  | 0.00  | 0.00  |
| 62 | 6 | 0.00  | 0.00  | 0.00  | 0.00  | 0.00  | 0.00  | 0.00  | 0.00  | 0.00  |
| 63 | 6 | 0.00  | 0.00  | 0.00  | 0.00  | 0.00  | 0.00  | 0.00  | 0.00  | 0.00  |
| 64 | 6 | 0.00  | 0.00  | 0.00  | 0.00  | 0.00  | 0.00  | 0.00  | 0.00  | 0.00  |
| 65 | 8 | 0.00  | 0.00  | 0.00  | 0.00  | 0.00  | 0.00  | 0.00  | 0.00  | 0.00  |
| 66 | 1 | 0.00  | 0.00  | 0.00  | 0.00  | 0.00  | 0.00  | 0.00  | 0.00  | 0.00  |
| 67 | 6 | 0.00  | 0.00  | 0.00  | 0.00  | 0.00  | 0.00  | 0.00  | 0.00  | 0.00  |
| 68 | 1 | 0.00  | 0.00  | 0.00  | 0.00  | 0.00  | 0.00  | 0.00  | 0.00  | 0.00  |
| 69 | 1 | 0.00  | 0.00  | 0.00  | 0.00  | 0.00  | 0.00  | 0.00  | 0.00  | 0.00  |
| 70 | 1 | 0.00  | 0.00  | 0.00  | 0.00  | 0.00  | 0.00  | 0.00  | 0.00  | 0.00  |
| 71 | 6 | 0.00  | 0.00  | 0.00  | 0.00  | 0.00  | 0.00  | 0.00  | 0.00  | 0.00  |
| 72 | 1 | 0.00  | 0.00  | 0.00  | 0.00  | 0.00  | 0.00  | 0.00  | 0.00  | 0.00  |
| 73 | 1 | 0.00  | 0.00  | 0.01  | 0.00  | 0.00  | 0.00  | -0.01 | 0.00  | -0.01 |
| 74 | 1 | 0.00  | 0.00  | 0.00  | 0.00  | 0.00  | 0.00  | 0.00  | -0.01 | 0.00  |

187

188

189

A

A

A

Frequencies -- 3040.0004

3050.8703

3050.9200

Red. masses -- 1.0398

1.0557

1.0665

|                |    |       |          |       |       |          |       |       |         |       |  |
|----------------|----|-------|----------|-------|-------|----------|-------|-------|---------|-------|--|
| Frc consts --  |    |       | 5.6616   |       |       | 5.7896   |       |       | 5.8487  |       |  |
| IR Inten --    |    |       | 30.2712  |       |       | 2.6091   |       |       | 53.1131 |       |  |
| Raman Activ -- |    |       | 283.1418 |       |       | 311.9550 |       |       | 89.4753 |       |  |
| Depolar (P) -- |    |       | 0.0417   |       |       | 0.0503   |       |       | 0.1617  |       |  |
| Depolar (U) -- |    |       | 0.0800   |       |       | 0.0958   |       |       | 0.2784  |       |  |
| Atom           | AN | X     | Y        | Z     | X     | Y        | Z     | X     | Y       | Z     |  |
| 1              | 6  | 0.00  | 0.00     | 0.00  | 0.00  | 0.00     | 0.00  | 0.00  | 0.00    | 0.00  |  |
| 2              | 6  | 0.00  | 0.00     | 0.00  | 0.00  | 0.00     | 0.00  | 0.00  | 0.00    | 0.00  |  |
| 3              | 6  | 0.00  | 0.00     | 0.00  | 0.00  | 0.00     | 0.00  | 0.00  | 0.00    | 0.00  |  |
| 4              | 6  | 0.00  | 0.00     | 0.00  | 0.00  | 0.00     | 0.00  | 0.00  | 0.00    | 0.00  |  |
| 5              | 6  | 0.00  | 0.00     | 0.00  | 0.00  | 0.00     | 0.00  | 0.00  | 0.00    | 0.00  |  |
| 6              | 6  | 0.00  | 0.00     | 0.00  | 0.00  | 0.00     | 0.00  | 0.00  | 0.00    | 0.00  |  |
| 7              | 8  | 0.00  | 0.00     | 0.00  | 0.00  | 0.00     | 0.00  | 0.00  | 0.00    | 0.00  |  |
| 8              | 6  | 0.00  | 0.00     | 0.00  | 0.00  | 0.00     | 0.00  | 0.00  | 0.00    | 0.00  |  |
| 9              | 6  | 0.00  | 0.00     | 0.01  | -0.02 | 0.01     | -0.04 | -0.03 | 0.01    | -0.05 |  |
| 10             | 1  | -0.04 | 0.01     | -0.08 | 0.26  | -0.08    | 0.50  | 0.35  | -0.10   | 0.65  |  |
| 11             | 8  | 0.00  | 0.00     | 0.00  | 0.00  | 0.00     | 0.00  | 0.00  | 0.00    | 0.00  |  |
| 12             | 6  | 0.00  | 0.00     | 0.00  | 0.00  | 0.00     | 0.00  | 0.00  | 0.01    | 0.00  |  |
| 13             | 1  | 0.00  | 0.00     | 0.00  | 0.00  | -0.05    | -0.05 | 0.00  | -0.06   | -0.06 |  |
| 14             | 6  | 0.00  | 0.00     | 0.00  | 0.00  | 0.00     | 0.00  | 0.00  | 0.00    | 0.00  |  |
| 15             | 8  | 0.00  | 0.00     | 0.00  | 0.00  | 0.00     | 0.00  | 0.00  | 0.00    | 0.00  |  |
| 16             | 6  | -0.05 | -0.01    | -0.02 | 0.00  | 0.00     | 0.00  | 0.00  | 0.00    | 0.00  |  |
| 17             | 1  | 0.56  | 0.13     | -0.39 | 0.04  | 0.01     | -0.03 | 0.05  | 0.01    | -0.04 |  |
| 18             | 1  | 0.00  | 0.35     | 0.46  | 0.00  | 0.01     | 0.01  | 0.00  | 0.01    | 0.01  |  |
| 19             | 1  | 0.00  | -0.35    | 0.11  | 0.00  | -0.02    | 0.01  | 0.00  | -0.03   | 0.01  |  |
| 20             | 6  | 0.00  | 0.00     | 0.00  | 0.00  | 0.00     | 0.00  | -0.01 | 0.00    | -0.01 |  |
| 21             | 1  | -0.03 | 0.01     | -0.04 | 0.05  | -0.02    | 0.06  | 0.07  | -0.02   | 0.08  |  |
| 22             | 6  | 0.00  | 0.00     | 0.00  | 0.00  | 0.00     | 0.00  | 0.00  | 0.00    | 0.00  |  |
| 23             | 1  | -0.05 | 0.02     | 0.02  | -0.03 | 0.01     | 0.01  | -0.04 | 0.02    | 0.02  |  |
| 24             | 1  | -0.01 | -0.02    | -0.03 | -0.01 | -0.03    | -0.04 | -0.01 | -0.04   | -0.04 |  |
| 25             | 1  | 0.02  | 0.02     | -0.01 | 0.02  | 0.03     | -0.01 | 0.02  | 0.03    | -0.01 |  |
| 26             | 6  | 0.00  | 0.00     | 0.00  | 0.00  | 0.00     | 0.00  | 0.00  | 0.00    | 0.00  |  |
| 27             | 1  | 0.00  | 0.00     | -0.01 | -0.02 | -0.02    | -0.03 | 0.01  | 0.01    | 0.02  |  |
| 28             | 1  | 0.00  | 0.00     | 0.01  | -0.04 | -0.04    | 0.08  | 0.03  | 0.03    | -0.06 |  |
| 29             | 6  | 0.00  | 0.00     | 0.01  | 0.00  | 0.00     | 0.00  | 0.00  | 0.00    | 0.00  |  |
| 30             | 1  | -0.08 | 0.03     | -0.11 | -0.02 | 0.01     | -0.03 | -0.03 | 0.01    | -0.04 |  |
| 31             | 1  | 0.03  | 0.01     | 0.00  | -0.01 | 0.00     | 0.00  | -0.01 | 0.00    | 0.00  |  |
| 32             | 6  | 0.00  | 0.00     | 0.00  | 0.00  | 0.00     | 0.00  | 0.00  | 0.00    | 0.00  |  |
| 33             | 1  | -0.01 | 0.00     | 0.01  | 0.00  | 0.00     | 0.00  | 0.00  | 0.00    | 0.00  |  |
| 34             | 6  | 0.00  | 0.00     | 0.00  | 0.00  | 0.00     | 0.00  | 0.00  | 0.00    | 0.00  |  |
| 35             | 1  | 0.00  | 0.00     | 0.00  | 0.00  | 0.00     | 0.00  | 0.00  | 0.00    | 0.00  |  |
| 36             | 6  | 0.00  | 0.00     | 0.00  | 0.01  | 0.00     | 0.00  | 0.01  | 0.00    | 0.00  |  |
| 37             | 1  | 0.00  | 0.00     | 0.00  | 0.02  | -0.04    | -0.03 | 0.02  | -0.05   | -0.03 |  |
| 38             | 1  | 0.00  | 0.00     | 0.00  | 0.02  | 0.03     | -0.01 | 0.02  | 0.04    | -0.02 |  |
| 39             | 1  |       |          |       |       |          |       |       |         |       |  |



[illegible]





|    |   |       |       |       |       |       |       |       |       |       |
|----|---|-------|-------|-------|-------|-------|-------|-------|-------|-------|
| 3  | 6 | 0.00  | 0.00  | 0.00  | 0.00  | 0.00  | 0.00  | 0.00  | 0.00  | 0.00  |
| 4  | 6 | 0.00  | 0.00  | 0.00  | 0.00  | 0.00  | 0.00  | 0.00  | 0.00  | 0.00  |
| 5  | 6 | 0.00  | 0.00  | 0.00  | 0.00  | 0.00  | 0.00  | 0.00  | 0.00  | 0.00  |
| 6  | 6 | 0.00  | 0.00  | 0.00  | 0.00  | 0.00  | 0.00  | 0.00  | 0.00  | 0.00  |
| 7  | 8 | 0.00  | 0.00  | 0.00  | 0.00  | 0.00  | 0.00  | 0.00  | 0.00  | 0.00  |
| 8  | 6 | 0.00  | 0.00  | 0.00  | 0.00  | 0.00  | 0.00  | 0.00  | 0.00  | 0.00  |
| 9  | 6 | 0.00  | 0.00  | 0.01  | -0.01 | 0.00  | -0.01 | 0.00  | 0.00  | 0.00  |
| 10 | 1 | -0.04 | 0.01  | -0.06 | 0.06  | -0.02 | 0.10  | 0.02  | -0.01 | 0.05  |
| 11 | 8 | 0.00  | 0.00  | 0.00  | 0.00  | 0.00  | 0.00  | 0.00  | 0.00  | 0.00  |
| 12 | 6 | 0.00  | 0.03  | 0.03  | 0.01  | -0.05 | -0.05 | 0.00  | 0.00  | 0.00  |
| 13 | 1 | 0.03  | -0.33 | -0.31 | -0.06 | 0.62  | 0.59  | 0.00  | 0.05  | 0.04  |
| 14 | 6 | 0.00  | 0.00  | 0.00  | 0.00  | 0.00  | 0.00  | 0.00  | 0.00  | 0.00  |
| 15 | 8 | 0.00  | 0.00  | 0.00  | 0.00  | 0.00  | 0.00  | 0.00  | 0.00  | 0.00  |
| 16 | 6 | 0.00  | 0.00  | 0.00  | 0.00  | 0.00  | 0.01  | 0.04  | -0.01 | -0.08 |
| 17 | 1 | -0.01 | 0.00  | 0.01  | 0.04  | 0.01  | -0.03 | -0.53 | -0.13 | 0.36  |
| 18 | 1 | 0.00  | 0.00  | 0.01  | 0.00  | -0.03 | -0.04 | 0.02  | 0.44  | 0.56  |
| 19 | 1 | 0.00  | 0.00  | 0.00  | 0.00  | 0.01  | 0.00  | 0.02  | -0.15 | 0.03  |
| 20 | 6 | 0.00  | 0.00  | 0.00  | 0.00  | 0.00  | 0.00  | 0.00  | 0.00  | 0.00  |
| 21 | 1 | 0.00  | 0.00  | 0.00  | 0.00  | 0.00  | 0.01  | 0.01  | 0.00  | 0.01  |
| 22 | 6 | 0.00  | 0.00  | 0.00  | 0.00  | 0.00  | 0.00  | 0.00  | 0.00  | 0.00  |
| 23 | 1 | -0.01 | 0.01  | 0.01  | 0.02  | -0.01 | -0.01 | 0.00  | 0.00  | 0.00  |
| 24 | 1 | 0.00  | 0.00  | 0.00  | 0.00  | 0.00  | 0.00  | 0.00  | 0.02  | 0.02  |
| 25 | 1 | 0.01  | 0.01  | 0.00  | -0.01 | -0.01 | 0.00  | -0.02 | -0.03 | 0.01  |
| 26 | 6 | 0.00  | 0.00  | 0.00  | 0.00  | 0.00  | 0.00  | 0.00  | 0.00  | 0.00  |
| 27 | 1 | 0.00  | 0.00  | 0.00  | 0.00  | 0.00  | 0.00  | 0.00  | 0.00  | 0.00  |
| 28 | 1 | 0.00  | 0.00  | 0.00  | 0.00  | 0.00  | 0.00  | 0.00  | 0.00  | 0.00  |
| 29 | 6 | 0.00  | 0.00  | 0.00  | 0.00  | 0.00  | 0.00  | -0.01 | 0.00  | 0.00  |
| 30 | 1 | 0.01  | 0.00  | 0.01  | -0.01 | 0.00  | -0.02 | 0.03  | -0.01 | 0.04  |
| 31 | 1 | 0.02  | 0.01  | 0.00  | -0.04 | -0.02 | 0.00  | 0.11  | 0.05  | -0.01 |
| 32 | 6 | 0.00  | 0.00  | 0.00  | 0.00  | 0.00  | 0.00  | 0.00  | 0.00  | 0.00  |
| 33 | 1 | 0.00  | 0.00  | 0.00  | 0.00  | 0.00  | 0.00  | 0.00  | 0.00  | 0.00  |
| 34 | 6 | 0.00  | 0.00  | 0.00  | 0.00  | 0.00  | 0.00  | 0.00  | 0.00  | 0.00  |
| 35 | 1 | 0.00  | 0.00  | 0.00  | 0.00  | 0.00  | 0.00  | 0.00  | 0.00  | 0.00  |
| 36 | 6 | 0.00  | 0.00  | 0.00  | 0.00  | 0.00  | -0.01 | 0.00  | 0.00  | 0.00  |
| 37 | 1 | 0.02  | -0.04 | -0.03 | -0.02 | 0.06  | 0.03  | -0.01 | 0.02  | 0.01  |
| 38 | 1 | 0.02  | 0.03  | -0.02 | -0.03 | -0.06 | 0.03  | 0.00  | -0.01 | 0.00  |
| 39 | 1 | -0.05 | 0.00  | 0.00  | 0.09  | -0.01 | 0.01  | 0.00  | 0.00  | 0.00  |
| 40 | 6 | 0.00  | 0.00  | 0.00  | 0.00  | 0.00  | 0.00  | 0.00  | 0.00  | 0.00  |
| 41 | 1 | 0.00  | 0.00  | 0.00  | 0.00  | 0.00  | 0.00  | 0.00  | 0.00  | 0.00  |
| 42 | 6 | 0.00  | 0.00  | 0.00  | 0.00  | 0.00  | 0.00  | 0.00  | 0.00  | 0.00  |
| 43 | 1 | 0.00  | 0.00  | 0.00  | 0.00  | 0.00  | 0.00  | 0.00  | 0.00  | 0.00  |
| 44 | 1 | 0.00  | -0.01 | 0.00  | 0.00  | 0.01  | 0.00  | 0.00  | 0.0   |       |

|    |   |       |       |       |       |       |       |      |       |      |
|----|---|-------|-------|-------|-------|-------|-------|------|-------|------|
| 55 | 6 | 0.00  | 0.00  | 0.00  | 0.00  | 0.00  | 0.00  | 0.00 | 0.00  | 0.00 |
| 56 | 1 | 0.00  | 0.00  | 0.00  | 0.00  | 0.00  | 0.00  | 0.00 | 0.00  | 0.00 |
| 57 | 6 | 0.00  | 0.00  | 0.00  | 0.00  | 0.00  | 0.00  | 0.00 | 0.00  | 0.00 |
| 58 | 1 | 0.00  | 0.00  | 0.00  | 0.00  | 0.00  | 0.00  | 0.00 | 0.00  | 0.00 |
| 59 | 8 | 0.00  | 0.00  | 0.00  | 0.00  | 0.00  | 0.00  | 0.00 | 0.00  | 0.00 |
| 60 | 8 | 0.00  | 0.00  | 0.00  | 0.00  | 0.00  | 0.00  | 0.00 | 0.00  | 0.00 |
| 61 | 8 | 0.00  | 0.00  | 0.00  | 0.00  | 0.00  | 0.00  | 0.00 | 0.00  | 0.00 |
| 62 | 6 | 0.00  | 0.00  | 0.00  | 0.00  | 0.00  | 0.00  | 0.00 | 0.00  | 0.00 |
| 63 | 6 | 0.00  | 0.00  | 0.00  | 0.00  | 0.00  | 0.00  | 0.00 | 0.00  | 0.00 |
| 64 | 6 | 0.00  | 0.00  | 0.00  | 0.00  | 0.00  | 0.00  | 0.00 | 0.00  | 0.00 |
| 65 | 8 | 0.00  | 0.00  | 0.00  | 0.00  | 0.00  | 0.00  | 0.00 | 0.00  | 0.00 |
| 66 | 1 | 0.01  | 0.00  | -0.01 | 0.00  | 0.00  | -0.01 | 0.00 | 0.00  | 0.00 |
| 67 | 6 | 0.01  | 0.00  | -0.01 | 0.00  | 0.00  | 0.00  | 0.00 | 0.00  | 0.00 |
| 68 | 1 | -0.05 | 0.02  | 0.07  | -0.03 | 0.01  | 0.04  | 0.00 | 0.00  | 0.00 |
| 69 | 1 | -0.04 | 0.00  | -0.01 | -0.02 | 0.00  | -0.01 | 0.00 | 0.00  | 0.00 |
| 70 | 1 | 0.00  | -0.01 | 0.01  | 0.00  | -0.01 | 0.00  | 0.00 | 0.00  | 0.00 |
| 71 | 6 | -0.05 | 0.05  | -0.03 | -0.03 | 0.03  | -0.02 | 0.00 | 0.00  | 0.00 |
| 72 | 1 | 0.21  | 0.18  | 0.02  | 0.11  | 0.09  | 0.01  | 0.00 | 0.00  | 0.00 |
| 73 | 1 | 0.16  | -0.07 | 0.34  | 0.10  | -0.05 | 0.21  | 0.00 | 0.00  | 0.01 |
| 74 | 1 | 0.22  | -0.70 | -0.02 | 0.11  | -0.36 | -0.01 | 0.00 | -0.02 | 0.00 |



|    |   |       |       |       |       |       |       |       |       |       |
|----|---|-------|-------|-------|-------|-------|-------|-------|-------|-------|
| 23 | 1 | 0.00  | 0.00  | 0.00  | 0.00  | 0.00  | 0.00  | 0.00  | 0.00  | 0.00  |
| 24 | 1 | 0.00  | 0.01  | 0.01  | 0.00  | 0.00  | 0.00  | 0.00  | 0.00  | 0.00  |
| 25 | 1 | 0.00  | -0.01 | 0.00  | 0.00  | 0.00  | 0.00  | 0.00  | 0.00  | 0.00  |
| 26 | 6 | 0.00  | 0.00  | 0.00  | 0.00  | 0.00  | 0.00  | 0.00  | 0.00  | 0.00  |
| 27 | 1 | 0.00  | 0.00  | 0.00  | 0.01  | 0.01  | 0.02  | 0.00  | 0.00  | 0.00  |
| 28 | 1 | 0.00  | 0.00  | 0.00  | 0.00  | 0.00  | 0.01  | 0.00  | 0.00  | 0.00  |
| 29 | 6 | -0.09 | -0.03 | -0.02 | 0.00  | 0.00  | 0.00  | 0.00  | 0.00  | 0.00  |
| 30 | 1 | 0.20  | -0.08 | 0.29  | 0.00  | 0.00  | 0.00  | 0.00  | 0.00  | 0.00  |
| 31 | 1 | 0.82  | 0.39  | -0.10 | 0.00  | 0.00  | 0.00  | 0.00  | 0.00  | 0.00  |
| 32 | 6 | 0.00  | 0.00  | 0.00  | 0.00  | 0.00  | 0.00  | 0.00  | 0.00  | 0.00  |
| 33 | 1 | 0.00  | 0.00  | 0.00  | 0.00  | 0.00  | 0.00  | 0.00  | 0.00  | 0.00  |
| 34 | 6 | 0.00  | 0.00  | 0.00  | 0.00  | 0.00  | 0.00  | 0.00  | 0.00  | 0.00  |
| 35 | 1 | 0.00  | 0.00  | 0.00  | 0.00  | 0.00  | 0.00  | 0.00  | 0.00  | 0.00  |
| 36 | 6 | 0.00  | 0.00  | 0.00  | 0.00  | 0.00  | 0.00  | 0.00  | 0.00  | 0.00  |
| 37 | 1 | 0.00  | 0.01  | 0.01  | 0.00  | 0.00  | 0.00  | 0.00  | 0.00  | 0.00  |
| 38 | 1 | 0.00  | 0.00  | 0.00  | 0.00  | 0.00  | 0.00  | 0.00  | 0.00  | 0.00  |
| 39 | 1 | 0.00  | 0.00  | 0.00  | 0.00  | 0.00  | 0.00  | 0.00  | 0.00  | 0.00  |
| 40 | 6 | 0.00  | 0.00  | 0.00  | 0.00  | 0.00  | 0.00  | 0.00  | 0.00  | 0.00  |
| 41 | 1 | 0.00  | 0.00  | 0.00  | 0.00  | 0.00  | 0.00  | 0.00  | 0.00  | 0.00  |
| 42 | 6 | 0.00  | 0.00  | 0.00  | -0.05 | -0.07 | -0.02 | 0.00  | 0.00  | 0.00  |
| 43 | 1 | 0.00  | 0.00  | 0.00  | 0.39  | 0.23  | 0.40  | -0.01 | 0.00  | -0.01 |
| 44 | 1 | 0.00  | 0.00  | 0.00  | -0.05 | 0.72  | -0.04 | 0.00  | -0.01 | 0.00  |
| 45 | 1 | 0.00  | 0.00  | 0.00  | 0.30  | -0.10 | -0.09 | 0.00  | 0.00  | 0.00  |
| 46 | 6 | 0.00  | 0.00  | 0.00  | 0.00  | 0.00  | 0.00  | 0.00  | 0.00  | 0.00  |
| 47 | 1 | 0.00  | 0.00  | 0.00  | 0.00  | 0.00  | 0.00  | -0.01 | -0.01 | -0.01 |
| 48 | 6 | 0.00  | 0.00  | 0.00  | 0.00  | 0.00  | 0.00  | 0.00  | 0.00  | 0.00  |
| 49 | 1 | 0.00  | 0.00  | 0.00  | 0.02  | 0.00  | -0.01 | 0.00  | 0.00  | 0.00  |
| 50 | 1 | 0.00  | 0.00  | 0.00  | 0.00  | 0.03  | -0.03 | 0.00  | 0.00  | 0.00  |
| 51 | 6 | 0.00  | 0.00  | 0.00  | 0.00  | 0.00  | 0.00  | 0.00  | 0.00  | 0.00  |
| 52 | 1 | 0.00  | 0.00  | 0.00  | 0.00  | 0.00  | 0.00  | 0.00  | 0.00  | 0.00  |
| 53 | 6 | 0.00  | 0.00  | 0.00  | 0.00  | 0.00  | 0.00  | 0.00  | 0.00  | 0.00  |
| 54 | 1 | 0.00  | 0.00  | 0.00  | 0.00  | 0.00  | 0.00  | 0.00  | 0.00  | 0.00  |
| 55 | 6 | 0.00  | 0.00  | 0.00  | 0.00  | 0.00  | 0.00  | 0.00  | 0.00  | 0.00  |
| 56 | 1 | 0.00  | 0.00  | 0.00  | 0.00  | 0.00  | 0.00  | 0.00  | 0.00  | 0.00  |
| 57 | 6 | 0.00  | 0.00  | 0.00  | 0.00  | 0.00  | 0.00  | 0.00  | 0.00  | 0.00  |
| 58 | 1 | 0.00  | 0.00  | 0.00  | 0.00  | 0.00  | 0.00  | 0.00  | 0.00  | 0.00  |
| 59 | 8 | 0.00  | 0.00  | 0.00  | 0.00  | 0.00  | 0.00  | 0.00  | 0.00  | 0.00  |
| 60 | 8 | 0.00  | 0.00  | 0.00  | 0.00  | 0.00  | 0.00  | 0.00  | 0.00  | 0.00  |
| 61 | 8 | 0.00  | 0.00  | 0.00  | 0.00  | 0.00  | 0.00  | 0.00  | 0.00  | 0.00  |
| 62 | 6 | 0.00  | 0.00  | 0.00  | 0.00  | 0.00  | 0.00  | 0.00  | 0.00  | 0.00  |
| 63 | 6 | 0.00  | 0.00  | 0.00  | 0.00  | 0.00  | 0.00  | 0.00  | 0.00  | 0.00  |
| 64 | 6 | 0.00  | 0.00  | 0.00  | 0.00  | 0.00  | 0.00  | -0.01 | 0.00  | 0.01  |
| 65 | 8 | 0.00  | 0.00  | 0.00  | 0.00  | 0.00  | 0.00  | 0.00  | 0.00  | 0.00  |
| 66 | 1 | 0.00  | 0.00  | 0.00  | 0.00  | 0.00  | 0.00  | 0.11  | -0.04 | -0.15 |
| 67 | 6 | 0.00  | 0.00  | 0.00  | 0.00  | 0.00  | 0.00  | 0.06  | 0.00  | -0.07 |
| 68 | 1 | 0.00  | 0.00  | 0.00  | -0.01 | 0.00  | 0.01  | -0.54 | 0.17  | 0.70  |
| 69 | 1 | 0.00  | 0.00  | 0.00  | 0.00  | 0.00  | 0.00  | -0.19 | 0.00  | -0.08 |
| 70 | 1 | 0.00  | 0.00  | 0.00  | 0.00  | 0.00  | 0.00  | 0.04  | -0.17 | 0.15  |
| 71 | 6 | 0.00  | 0.00  | 0.00  | 0.00  | 0.00  | 0.00  | 0.01  | 0.01  | 0.00  |
| 72 | 1 | 0.00  | 0.00  | 0.00  | 0.00  | 0.00  | 0.00  | -0.14 | -0.10 | -0.02 |
| 73 | 1 | 0.00  | 0.00  | 0.00  | 0.00  | 0.00  | 0.00  | -0.02 | 0.01  | -0.04 |
| 74 | 1 | 0.00  | 0.00  | 0.00  | 0.00  | 0.00  | 0.00  | -0.01 | 0.04  | 0.00  |

[illegible]

|    |   |       |      |      |       |       |       |       |      |      |      |
|----|---|-------|------|------|-------|-------|-------|-------|------|------|------|
| 43 | 1 | 0.00  | 0.00 | 0.00 | 0.00  | 0.00  | 0.00  | 0.00  | 0.00 | 0.00 | 0.00 |
| 44 | 1 | 0.00  | 0.00 | 0.00 | 0.00  | 0.00  | 0.00  | 0.00  | 0.00 | 0.00 | 0.00 |
| 45 | 1 | 0.00  | 0.00 | 0.00 | 0.00  | 0.00  | 0.00  | -0.01 | 0.00 | 0.00 | 0.00 |
| 46 | 6 | 0.00  | 0.00 | 0.00 | 0.00  | 0.01  | 0.00  | 0.00  | 0.00 | 0.00 | 0.00 |
| 47 | 1 | 0.00  | 0.00 | 0.00 | -0.04 | -0.07 | -0.05 | 0.00  | 0.01 | 0.01 | 0.00 |
| 48 | 6 | 0.00  | 0.00 | 0.00 | 0.00  | 0.00  | 0.00  | 0.00  | 0.00 | 0.00 | 0.00 |
| 49 | 1 | 0.00  | 0.00 | 0.00 | 0.00  | 0.00  | 0.00  | 0.00  | 0.00 | 0.00 | 0.00 |
| 50 | 1 | 0.00  | 0.00 | 0.00 | 0.00  | 0.00  | 0.00  | 0.00  | 0.00 | 0.00 | 0.00 |
| 51 | 6 | 0.00  | 0.00 | 0.00 | 0.00  | 0.00  | 0.00  | 0.00  | 0.00 | 0.00 | 0.00 |
| 52 | 1 | 0.00  | 0.00 | 0.00 | 0.00  | 0.00  | 0.00  | 0.00  | 0.00 | 0.00 | 0.00 |
| 53 | 6 | 0.00  | 0.00 | 0.00 | 0.00  | 0.00  | 0.00  | 0.00  | 0.00 | 0.00 | 0.00 |
| 54 | 1 | 0.00  | 0.00 | 0.00 | 0.00  | 0.00  | 0.00  | 0.00  | 0.00 | 0.00 | 0.00 |
| 55 | 6 | 0.00  | 0.00 | 0.00 | 0.00  | 0.00  | 0.00  | 0.00  | 0.00 | 0.00 | 0.00 |
| 56 | 1 | 0.00  | 0.00 | 0.00 | 0.00  | 0.00  | 0.00  | 0.00  | 0.00 | 0.00 | 0.00 |
| 57 | 6 | 0.00  | 0.00 | 0.00 | 0.00  | 0.00  | 0.00  | 0.00  | 0.00 | 0.00 | 0.00 |
| 58 | 1 | 0.00  | 0.00 | 0.00 | 0.00  | 0.00  | 0.00  | 0.00  | 0.00 | 0.00 | 0.00 |
| 59 | 8 | 0.00  | 0.00 | 0.00 | 0.00  | 0.00  | 0.00  | 0.00  | 0.00 | 0.00 | 0.00 |
| 60 | 8 | 0.00  | 0.00 | 0.00 | 0.00  | 0.00  | 0.00  | 0.00  | 0.00 | 0.00 | 0.00 |
| 61 | 8 | 0.00  | 0.00 | 0.00 | 0.00  | 0.00  | 0.00  | 0.00  | 0.00 | 0.00 | 0.00 |
| 62 | 6 | 0.00  | 0.00 | 0.00 | 0.00  | 0.00  | 0.00  | 0.00  | 0.00 | 0.00 | 0.00 |
| 63 | 6 | 0.00  | 0.00 | 0.00 | 0.00  | 0.00  | 0.00  | 0.00  | 0.00 | 0.00 | 0.00 |
| 64 | 6 | 0.00  | 0.00 | 0.00 | 0.00  | 0.00  | 0.00  | 0.00  | 0.00 | 0.00 | 0.00 |
| 65 | 8 | 0.00  | 0.00 | 0.00 | 0.00  | 0.00  | 0.00  | 0.00  | 0.00 | 0.00 | 0.00 |
| 66 | 1 | 0.00  | 0.00 | 0.00 | -0.02 | 0.01  | 0.03  | 0.00  | 0.00 | 0.00 | 0.00 |
| 67 | 6 | 0.00  | 0.00 | 0.00 | -0.01 | 0.00  | 0.01  | 0.00  | 0.00 | 0.00 | 0.00 |
| 68 | 1 | 0.00  | 0.00 | 0.00 | 0.08  | -0.03 | -0.11 | 0.00  | 0.00 | 0.00 | 0.00 |
| 69 | 1 | 0.00  | 0.00 | 0.00 | 0.03  | 0.00  | 0.01  | 0.00  | 0.00 | 0.00 | 0.00 |
| 70 | 1 | 0.00  | 0.00 | 0.00 | -0.01 | 0.03  | -0.03 | 0.00  | 0.00 | 0.00 | 0.00 |
| 71 | 6 | 0.00  | 0.00 | 0.00 | 0.05  | 0.07  | 0.02  | 0.00  | 0.00 | 0.00 | 0.00 |
| 72 | 1 | -0.01 | 0.00 | 0.00 | -0.71 | -0.51 | -0.09 | 0.03  | 0.02 | 0.00 | 0.00 |
| 73 | 1 | 0.00  | 0.00 | 0.00 | -0.05 | 0.04  | -0.11 | 0.00  | 0.00 | 0.00 | 0.00 |
| 74 | 1 | 0.00  | 0.00 | 0.00 | 0.14  | -0.39 | 0.00  | -0.01 | 0.02 | 0.00 | 0.00 |

|     |     |     |
|-----|-----|-----|
| 205 | 206 | 207 |
| A   | A   | A   |

|                |           |           |           |
|----------------|-----------|-----------|-----------|
| Frequencies -- | 3140.2706 | 3141.8739 | 3143.4693 |
| Red. masses -- | 1.1003    | 1.0998    | 1.0997    |
| Frc consts --  | 6.3928    | 6.3962    | 6.4023    |
| IR Inten --    | 38.9181   | 28.9110   | 10.9021   |
| Raman Activ -- | 116.5827  | 111.4035  | 48.9392   |
| Depolar (P) -- | 0.6330    | 0.7411    | 0.5829    |
| Depolar (U) -- | 0.7753    | 0.8513    | 0.7365    |

| Atom | AN | X    | Y    | Z    | X    | Y     | Z    | X     | Y    | Z     |
|------|----|------|------|------|------|-------|------|-------|------|-------|
| 1    | 6  | 0.00 | 0.00 | 0.00 | 0.00 | 0.00  | 0.00 | 0.00  | 0.00 | 0.00  |
| 2    | 6  | 0.00 | 0.00 | 0.00 | 0.00 | 0.00  | 0.00 | 0.00  | 0.00 | 0.00  |
| 3    | 6  | 0.00 | 0.00 | 0.00 | 0.00 | 0.00  | 0.00 | 0.00  | 0.00 | 0.00  |
| 4    | 6  | 0.00 | 0.00 | 0.00 | 0.00 | 0.00  | 0.00 | 0.00  | 0.00 | 0.00  |
| 5    | 6  | 0.00 | 0.00 | 0.00 | 0.00 | 0.00  | 0.00 | 0.00  | 0.00 | 0.00  |
| 6    | 6  | 0.00 | 0.00 | 0.00 | 0.00 | 0.00  | 0.00 | 0.00  | 0.00 | 0.00  |
| 7    | 8  | 0.00 | 0.00 | 0.00 | 0.00 | 0.00  | 0.00 | 0.00  | 0.00 | 0.00  |
| 8    | 6  | 0.00 | 0.00 | 0.00 | 0.00 | 0.00  | 0.00 | 0.00  | 0.00 | 0.00  |
| 9    | 6  | 0.00 | 0.00 | 0.00 | 0.00 | 0.00  | 0.00 | 0.00  | 0.00 | 0.00  |
| 10   | 1  | 0.00 | 0.00 | 0.00 | 0.02 | -0.01 | 0.04 | -0.01 | 0.00 | -0.01 |

[illegible]

|    |   |      |      |      |      |      |      |      |      |      |
|----|---|------|------|------|------|------|------|------|------|------|
| 63 | 6 | 0.00 | 0.00 | 0.00 | 0.00 | 0.00 | 0.00 | 0.00 | 0.00 | 0.00 |
| 64 | 6 | 0.00 | 0.00 | 0.00 | 0.00 | 0.00 | 0.00 | 0.00 | 0.00 | 0.00 |
| 65 | 8 | 0.00 | 0.00 | 0.00 | 0.00 | 0.00 | 0.00 | 0.00 | 0.00 | 0.00 |
| 66 | 1 | 0.00 | 0.00 | 0.00 | 0.00 | 0.00 | 0.00 | 0.00 | 0.00 | 0.00 |
| 67 | 6 | 0.00 | 0.00 | 0.00 | 0.00 | 0.00 | 0.00 | 0.00 | 0.00 | 0.00 |
| 68 | 1 | 0.00 | 0.00 | 0.00 | 0.00 | 0.00 | 0.00 | 0.00 | 0.00 | 0.00 |
| 69 | 1 | 0.00 | 0.00 | 0.00 | 0.00 | 0.00 | 0.00 | 0.00 | 0.00 | 0.00 |
| 70 | 1 | 0.00 | 0.00 | 0.00 | 0.00 | 0.00 | 0.00 | 0.00 | 0.00 | 0.00 |
| 71 | 6 | 0.00 | 0.00 | 0.00 | 0.00 | 0.00 | 0.00 | 0.00 | 0.00 | 0.00 |
| 72 | 1 | 0.00 | 0.00 | 0.00 | 0.00 | 0.00 | 0.00 | 0.00 | 0.00 | 0.00 |
| 73 | 1 | 0.00 | 0.00 | 0.00 | 0.00 | 0.00 | 0.00 | 0.00 | 0.00 | 0.00 |
| 74 | 1 | 0.00 | 0.00 | 0.00 | 0.00 | 0.00 | 0.00 | 0.00 | 0.00 | 0.00 |

208

209

210

A

A

A

|                |           |           |           |
|----------------|-----------|-----------|-----------|
| Frequencies -- | 3144.3416 | 3154.8146 | 3160.4647 |
| Red. masses -- | 1.0877    | 1.0910    | 1.0887    |
| Frc consts --  | 6.3363    | 6.3974    | 6.4073    |
| IR Inten --    | 14.1749   | 36.7377   | 13.1398   |
| Raman Activ -- | 225.2879  | 233.4891  | 103.7241  |
| Depolar (P) -- | 0.4552    | 0.1956    | 0.2100    |
| Depolar (U) -- | 0.6256    | 0.3272    | 0.3471    |

| Atom | AN | X     | Y     | Z     | X    | Y    | Z    | X    | Y    | Z    |
|------|----|-------|-------|-------|------|------|------|------|------|------|
| 1    | 6  | 0.00  | 0.00  | 0.00  | 0.00 | 0.00 | 0.00 | 0.00 | 0.00 | 0.00 |
| 2    | 6  | 0.00  | 0.00  | 0.00  | 0.00 | 0.00 | 0.00 | 0.00 | 0.00 | 0.00 |
| 3    | 6  | 0.00  | 0.00  | 0.00  | 0.00 | 0.00 | 0.00 | 0.00 | 0.00 | 0.00 |
| 4    | 6  | 0.00  | 0.00  | 0.00  | 0.00 | 0.00 | 0.00 | 0.00 | 0.00 | 0.00 |
| 5    | 6  | 0.00  | 0.00  | 0.00  | 0.00 | 0.00 | 0.00 | 0.00 | 0.00 | 0.00 |
| 6    | 6  | 0.00  | 0.00  | 0.00  | 0.00 | 0.00 | 0.00 | 0.00 | 0.00 | 0.00 |
| 7    | 8  | 0.00  | 0.00  | 0.00  | 0.00 | 0.00 | 0.00 | 0.00 | 0.00 | 0.00 |
| 8    | 6  | 0.00  | 0.00  | 0.00  | 0.00 | 0.00 | 0.00 | 0.00 | 0.00 | 0.00 |
| 9    | 6  | 0.00  | 0.00  | 0.00  | 0.00 | 0.00 | 0.00 | 0.00 | 0.00 | 0.00 |
| 10   | 1  | 0.00  | 0.00  | 0.00  | 0.00 | 0.00 | 0.00 | 0.00 | 0.00 | 0.00 |
| 11   | 8  | 0.00  | 0.00  | 0.00  | 0.00 | 0.00 | 0.00 | 0.00 | 0.00 | 0.00 |
| 12   | 6  | 0.00  | 0.00  | 0.00  | 0.00 | 0.00 | 0.00 | 0.00 | 0.00 | 0.00 |
| 13   | 1  | 0.00  | 0.00  | 0.00  | 0.00 | 0.02 | 0.02 | 0.00 | 0.00 | 0.00 |
| 14   | 6  | 0.00  | 0.00  | 0.00  | 0.00 | 0.00 | 0.00 | 0.00 | 0.00 | 0.00 |
| 15   | 8  | 0.00  | 0.00  | 0.00  | 0.00 | 0.00 | 0.00 | 0.00 | 0.00 | 0.00 |
| 16   | 6  | 0.00  | 0.01  | 0.00  | 0.00 | 0.00 | 0.00 | 0.00 | 0.00 | 0.00 |
| 17   | 1  | -0.02 | 0.00  | 0.01  | 0.00 | 0.00 | 0.00 | 0.00 | 0.00 | 0.00 |
| 18   | 1  | 0.00  | -0.02 | -0.03 | 0.00 | 0.00 | 0.00 | 0.00 | 0.00 | 0.00 |
| 19   | 1  | 0.00  | -0.07 | 0.02  | 0.00 | 0.00 | 0.00 | 0.00 | 0.00 | 0.00 |
| 20   | 6  | 0.00  | 0.00  | 0.00  | 0.00 | 0.00 | 0.00 | 0.00 | 0.00 | 0.00 |
| 21   | 1  | 0.00  | 0.00  | 0.00  | 0.00 | 0.00 | 0.00 | 0.00 | 0.00 | 0.00 |
| 22   | 6  | 0.00  | 0.00  | 0.00  | 0.00 | 0.00 | 0.00 | 0.00 | 0.00 | 0.00 |
| 23   | 1  | 0.03  | -0.01 | -0.01 | 0.00 | 0.00 | 0.00 | 0.00 | 0.00 | 0.00 |
| 24   | 1  | 0.00  | 0.00  | 0.00  | 0.00 | 0.00 | 0.00 | 0.00 | 0.00 | 0.00 |
| 25   | 1  | 0.02  | 0.03  | -0.01 | 0.00 | 0.00 | 0.00 | 0.00 | 0.00 | 0.00 |
| 26   | 6  | 0.00  | 0.00  | 0.00  | 0.00 | 0.00 | 0.00 | 0.00 | 0.00 | 0.00 |
| 27   | 1  | 0.00  | 0.00  | 0.00  | 0.00 | 0.00 | 0.00 | 0.00 | 0.00 | 0.00 |
| 28   | 1  | 0.00  | 0.00  | 0.00  | 0.00 | 0.00 | 0.00 | 0.00 | 0.00 | 0.00 |
| 29   | 6  | 0.00  | 0.00  | 0.00  | 0.00 | 0.00 | 0.00 | 0.00 | 0.00 | 0.00 |
| 30   | 1  | 0.01  | 0.00  | 0.01  | 0.00 | 0.00 | 0.00 | 0.00 | 0.00 | 0.00 |

|    |   |       |       |       |       |       |       |       |       |       |
|----|---|-------|-------|-------|-------|-------|-------|-------|-------|-------|
| 31 | 1 | -0.01 | 0.00  | 0.00  | 0.00  | 0.00  | 0.00  | 0.00  | 0.00  | 0.00  |
| 32 | 6 | 0.05  | 0.01  | -0.06 | 0.00  | 0.00  | 0.00  | 0.00  | 0.00  | 0.00  |
| 33 | 1 | -0.58 | -0.12 | 0.72  | 0.00  | 0.00  | 0.00  | 0.00  | 0.00  | 0.00  |
| 34 | 6 | 0.00  | 0.02  | 0.02  | 0.00  | 0.00  | 0.00  | 0.00  | 0.00  | 0.00  |
| 35 | 1 | 0.00  | -0.22 | -0.24 | 0.00  | 0.00  | 0.00  | 0.00  | 0.00  | 0.00  |
| 36 | 6 | 0.00  | 0.00  | 0.00  | 0.00  | 0.00  | 0.00  | 0.00  | 0.00  | 0.00  |
| 37 | 1 | 0.00  | 0.00  | 0.00  | 0.00  | 0.00  | 0.00  | 0.00  | 0.00  | 0.00  |
| 38 | 1 | 0.00  | 0.00  | 0.00  | -0.02 | -0.03 | 0.02  | 0.00  | 0.00  | 0.00  |
| 39 | 1 | 0.00  | 0.00  | 0.00  | -0.02 | 0.00  | 0.00  | 0.00  | 0.00  | 0.00  |
| 40 | 6 | 0.00  | 0.00  | 0.00  | 0.00  | 0.00  | 0.00  | 0.00  | 0.00  | 0.00  |
| 41 | 1 | 0.00  | 0.00  | 0.00  | 0.00  | 0.00  | 0.00  | 0.00  | 0.00  | 0.00  |
| 42 | 6 | 0.00  | 0.00  | 0.00  | 0.00  | 0.00  | 0.00  | 0.00  | 0.00  | 0.00  |
| 43 | 1 | 0.00  | 0.00  | 0.00  | 0.00  | 0.00  | 0.00  | 0.00  | 0.00  | 0.00  |
| 44 | 1 | 0.00  | 0.00  | 0.00  | 0.00  | 0.00  | 0.00  | 0.00  | 0.00  | 0.00  |
| 45 | 1 | 0.00  | 0.00  | 0.00  | 0.01  | 0.00  | 0.00  | 0.00  | 0.00  | 0.00  |
| 46 | 6 | 0.00  | 0.00  | 0.00  | -0.04 | -0.06 | -0.05 | 0.00  | 0.00  | 0.00  |
| 47 | 1 | 0.00  | 0.00  | 0.00  | 0.45  | 0.71  | 0.52  | 0.00  | 0.01  | 0.00  |
| 48 | 6 | 0.00  | 0.00  | 0.00  | 0.00  | 0.00  | 0.00  | 0.00  | 0.00  | 0.00  |
| 49 | 1 | 0.00  | 0.00  | 0.00  | -0.03 | 0.01  | 0.02  | 0.00  | 0.00  | 0.00  |
| 50 | 1 | 0.00  | 0.00  | 0.00  | 0.00  | 0.02  | -0.02 | 0.00  | 0.00  | 0.00  |
| 51 | 6 | 0.00  | 0.00  | 0.00  | 0.00  | 0.00  | 0.00  | 0.00  | 0.00  | 0.00  |
| 52 | 1 | 0.00  | 0.00  | 0.00  | 0.00  | 0.00  | 0.00  | 0.00  | 0.00  | 0.00  |
| 53 | 6 | 0.00  | 0.00  | 0.00  | 0.00  | 0.00  | 0.00  | 0.00  | 0.00  | 0.00  |
| 54 | 1 | 0.00  | 0.00  | 0.00  | 0.00  | 0.00  | 0.00  | 0.00  | 0.00  | 0.00  |
| 55 | 6 | 0.00  | 0.00  | 0.00  | 0.00  | 0.00  | 0.00  | 0.00  | 0.00  | 0.00  |
| 56 | 1 | 0.00  | 0.00  | 0.00  | 0.00  | 0.00  | 0.00  | 0.00  | 0.00  | 0.00  |
| 57 | 6 | 0.00  | 0.00  | 0.00  | 0.00  | 0.00  | 0.00  | 0.00  | 0.00  | 0.00  |
| 58 | 1 | 0.00  | 0.00  | 0.00  | 0.00  | 0.00  | 0.00  | 0.00  | 0.00  | 0.00  |
| 59 | 8 | 0.00  | 0.00  | 0.00  | 0.00  | 0.00  | 0.00  | 0.00  | 0.00  | 0.00  |
| 60 | 8 | 0.00  | 0.00  | 0.00  | 0.00  | 0.00  | 0.00  | 0.00  | 0.00  | 0.00  |
| 61 | 8 | 0.00  | 0.00  | 0.00  | 0.00  | 0.00  | 0.00  | 0.00  | 0.00  | 0.00  |
| 62 | 6 | 0.00  | 0.00  | 0.00  | 0.00  | 0.00  | 0.00  | 0.00  | 0.00  | 0.00  |
| 63 | 6 | 0.00  | 0.00  | 0.00  | 0.00  | 0.00  | 0.00  | 0.00  | 0.00  | 0.00  |
| 64 | 6 | 0.00  | 0.00  | 0.00  | 0.00  | 0.00  | 0.00  | 0.05  | -0.02 | -0.07 |
| 65 | 8 | 0.00  | 0.00  | 0.00  | 0.00  | 0.00  | 0.00  | 0.00  | 0.00  | 0.00  |
| 66 | 1 | 0.00  | 0.00  | 0.00  | 0.00  | 0.00  | 0.00  | -0.55 | 0.22  | 0.78  |
| 67 | 6 | 0.00  | 0.00  | 0.00  | 0.00  | 0.00  | 0.00  | 0.01  | 0.00  | -0.01 |
| 68 | 1 | 0.00  | 0.00  | 0.00  | 0.00  | 0.00  | 0.00  | -0.10 | 0.04  | 0.14  |
| 69 | 1 | 0.00  | 0.00  | 0.00  | 0.00  | 0.00  | 0.00  | -0.05 | 0.00  | -0.02 |
| 70 | 1 | 0.00  | 0.00  | 0.00  | 0.00  | 0.00  | 0.00  | 0.01  | -0.04 | 0.04  |
| 71 | 6 | 0.00  | 0.00  | 0.00  | 0.01  | 0.01  | 0.00  | 0.00  | 0.00  | 0.00  |
| 72 | 1 | 0.00  | 0.00  | 0.00  | -0.07 | -0.05 | -0.01 | 0.01  | 0.01  | 0.00  |
| 73 | 1 | 0.00  | 0.00  | 0.00  | 0.00  | 0.00  | -0.01 | 0.00  | 0.00  | -0.01 |
| 74 | 1 | 0.00  | 0.00  | 0.00  | 0.01  | -0.03 | 0.00  | 0.00  | 0.00  | 0.00  |

211

212

213

A

A

A

|                |           |           |           |
|----------------|-----------|-----------|-----------|
| Frequencies -- | 3170.4225 | 3175.3082 | 3189.3244 |
| Red. masses -- | 1.1006    | 1.0950    | 1.0881    |
| Frc consts --  | 6.5180    | 6.5050    | 6.5212    |
| IR Inten --    | 12.9561   | 19.8811   | 8.3712    |
| Raman Activ -- | 111.1091  | 372.2174  | 160.0412  |
| Depolar (P) -- | 0.7239    | 0.2288    | 0.1687    |

| Depolar (U) -- |   |       | 0.8398 |       |       | 0.3724 |       |       | 0.2887 |       |      |
|----------------|---|-------|--------|-------|-------|--------|-------|-------|--------|-------|------|
|                |   |       | Atom   | AN    | X     | Y      | Z     | X     | Y      | Z     | X    |
| 1              | 6 | 0.00  | 0.00   | 0.00  | 0.00  | 0.00   | 0.00  | 0.00  | 0.00   | 0.00  | 0.00 |
| 2              | 6 | 0.00  | 0.00   | 0.00  | 0.00  | 0.00   | 0.00  | 0.00  | 0.00   | 0.00  | 0.00 |
| 3              | 6 | 0.00  | 0.00   | 0.00  | 0.00  | 0.00   | 0.00  | 0.00  | 0.00   | 0.00  | 0.00 |
| 4              | 6 | 0.00  | 0.00   | 0.00  | 0.00  | 0.00   | 0.00  | 0.00  | 0.00   | 0.00  | 0.00 |
| 5              | 6 | 0.00  | 0.00   | 0.00  | 0.00  | 0.00   | 0.00  | 0.00  | 0.00   | 0.00  | 0.00 |
| 6              | 6 | 0.00  | 0.00   | 0.00  | 0.00  | 0.00   | 0.00  | 0.00  | 0.00   | 0.00  | 0.00 |
| 7              | 8 | 0.00  | 0.00   | 0.00  | 0.00  | 0.00   | 0.00  | 0.00  | 0.00   | 0.00  | 0.00 |
| 8              | 6 | 0.00  | 0.00   | 0.00  | 0.00  | 0.00   | 0.00  | 0.00  | 0.00   | 0.00  | 0.00 |
| 9              | 6 | 0.00  | 0.00   | 0.00  | 0.00  | 0.00   | 0.00  | 0.00  | 0.00   | 0.00  | 0.00 |
| 10             | 1 | 0.01  | 0.00   | 0.02  | 0.00  | 0.00   | 0.00  | 0.00  | 0.00   | 0.00  | 0.00 |
| 11             | 8 | 0.00  | 0.00   | 0.00  | 0.00  | 0.00   | 0.00  | 0.00  | 0.00   | 0.00  | 0.00 |
| 12             | 6 | 0.00  | 0.00   | 0.00  | 0.00  | 0.00   | 0.00  | 0.00  | 0.00   | 0.00  | 0.00 |
| 13             | 1 | 0.00  | 0.01   | 0.01  | 0.00  | 0.00   | 0.00  | 0.00  | 0.00   | 0.00  | 0.00 |
| 14             | 6 | 0.00  | 0.00   | 0.00  | 0.00  | 0.00   | 0.00  | 0.00  | 0.00   | 0.00  | 0.00 |
| 15             | 8 | 0.00  | 0.00   | 0.00  | 0.00  | 0.00   | 0.00  | 0.00  | 0.00   | 0.00  | 0.00 |
| 16             | 6 | 0.00  | 0.00   | 0.00  | 0.00  | 0.00   | 0.00  | 0.00  | 0.00   | 0.00  | 0.00 |
| 17             | 1 | 0.00  | 0.00   | 0.00  | 0.00  | 0.00   | 0.00  | 0.00  | 0.00   | 0.00  | 0.00 |
| 18             | 1 | 0.00  | 0.00   | 0.00  | 0.00  | 0.00   | 0.00  | 0.00  | 0.00   | 0.00  | 0.00 |
| 19             | 1 | 0.00  | 0.00   | 0.00  | 0.00  | 0.00   | 0.00  | 0.00  | 0.00   | 0.00  | 0.00 |
| 20             | 6 | 0.00  | 0.00   | 0.00  | 0.00  | 0.00   | 0.00  | 0.00  | 0.00   | 0.00  | 0.00 |
| 21             | 1 | 0.00  | 0.00   | 0.00  | 0.00  | 0.00   | 0.00  | 0.00  | 0.00   | 0.00  | 0.00 |
| 22             | 6 | 0.00  | -0.01  | 0.00  | 0.00  | 0.00   | 0.00  | 0.00  | 0.00   | 0.00  | 0.00 |
| 23             | 1 | -0.01 | 0.00   | 0.00  | 0.00  | 0.00   | 0.00  | 0.00  | 0.00   | 0.00  | 0.00 |
| 24             | 1 | 0.01  | 0.04   | 0.05  | 0.00  | 0.00   | 0.00  | 0.00  | 0.00   | 0.00  | 0.00 |
| 25             | 1 | 0.02  | 0.03   | -0.01 | 0.00  | 0.00   | 0.00  | 0.00  | 0.00   | 0.00  | 0.00 |
| 26             | 6 | 0.00  | 0.00   | 0.00  | 0.00  | 0.00   | 0.00  | 0.00  | 0.00   | 0.00  | 0.00 |
| 27             | 1 | 0.00  | 0.00   | 0.00  | 0.00  | 0.00   | 0.00  | 0.03  | 0.02   | 0.05  |      |
| 28             | 1 | 0.00  | 0.00   | 0.00  | 0.00  | 0.00   | 0.00  | -0.01 | -0.01  | 0.01  |      |
| 29             | 6 | 0.00  | 0.00   | 0.00  | 0.00  | 0.00   | 0.00  | 0.00  | 0.00   | 0.00  |      |
| 30             | 1 | 0.00  | 0.00   | 0.00  | 0.00  | 0.00   | 0.00  | 0.00  | 0.00   | 0.00  |      |
| 31             | 1 | 0.00  | 0.00   | 0.00  | 0.00  | 0.00   | 0.00  | 0.00  | 0.00   | 0.00  |      |
| 32             | 6 | 0.00  | 0.00   | 0.00  | 0.02  | 0.01   | -0.02 | 0.00  | 0.00   | 0.00  |      |
| 33             | 1 | 0.00  | 0.00   | 0.00  | -0.20 | -0.04  | 0.24  | 0.00  | 0.00   | 0.00  |      |
| 34             | 6 | 0.00  | 0.00   | 0.00  | 0.00  | -0.06  | -0.06 | 0.00  | 0.00   | 0.00  |      |
| 35             | 1 | 0.00  | 0.00   | 0.00  | -0.01 | 0.64   | 0.69  | 0.00  | 0.00   | 0.00  |      |
| 36             | 6 | -0.06 | -0.07  | 0.02  | 0.00  | 0.00   | 0.00  | 0.00  | 0.00   | 0.00  |      |
| 37             | 1 | -0.07 | 0.15   | 0.10  | 0.00  | 0.00   | 0.00  | 0.00  | 0.00   | 0.00  |      |
| 38             | 1 | 0.39  | 0.73   | -0.37 | 0.00  | 0.00   | 0.00  | -0.01 | -0.01  | 0.01  |      |
| 39             | 1 | 0.36  | -0.04  | 0.03  | 0.00  | 0.00   | 0.00  | -0.01 | 0.00   | 0.00  |      |
| 40             | 6 | 0.00  | 0.00   | 0.00  | 0.00  | 0.00   | 0.00  | 0.02  | -0.06  | -0.05 |      |
| 41             | 1 | 0.00  | 0.01   | 0.01  | 0.00  | 0.00   | 0.00  | -0.25 | 0.71   | 0.65  |      |
| 42             | 6 | 0.00  | 0.00   | 0.00  | 0.00  | 0.00   | 0.00  | 0.00  | 0.00   | 0.00  |      |
| 43             | 1 | 0.00  | 0.00   | 0.00  | 0.00  | 0.00   | 0.00  | 0.00  | 0.00   | 0.00  |      |
| 44             | 1 | 0.00  | 0.00   | 0.00  | 0.00  | 0.00   | 0.00  | 0.00  | 0.00   | 0.00  |      |
| 45             | 1 | 0.00  | 0.00   | 0.00  | 0.00  | 0.00   | 0.00  | 0.00  | 0.00   | 0.00  |      |
| 46             | 6 | 0.00  | 0.00   | 0.00  | 0.00  | 0.00   | 0.00  | 0.00  | 0.00   | 0.00  |      |
| 47             | 1 | 0.02  | 0.03   | 0.02  | 0.00  | 0.00   | 0.00  | 0.00  | 0.00   | 0.00  |      |
| 48             | 6 | 0.00  | 0.00   | 0.00  | 0.00  | 0.00   | 0.00  | 0.00  | 0.00   | 0.00  |      |
| 49             | 1 | 0.00  | 0.00   | 0.00  | 0.00  | 0.00   | 0.00  | 0.00  | 0.00   | 0.00  |      |
| 50             | 1 | 0.00  | 0.00   | 0.00  | 0.00  | 0.00   | 0.00  | 0.00  | 0.00   | 0.00  |      |

[illegible]



[illegible]

[illegible]
