# Supplementary material for: Electronic Structure, Spectroscopic (IR, Raman, UV-Vis, NMR), Optoelectronic, and NLO Properties Investigations of Rubescin E (C31H36O7) Molecule in Gas Phase and Chloroform Solution Using Ab Initio and DFT Methods
Source: Hindawi journal article supplement (doi:10.1155/2019/4246810), 2019-01-02
Supplement: f1 [file 4246810.f1.zip]

Archive with 3 entries (2 files):
- 4246810.f1/
- 4246810.f1/Supplementary material S1.pdf
- 4246810.f1/Supplementary material S2.pdf
